# Supplementary material for: IMK–IAA MIPAS retrieval version 8: CH 4 and N 2 O
Source: Copernicus journal article supplement (doi:10.5194/amt-17-2849-2024), 2024-05-13
Supplement: Supplementary file 1 [file amt-17-2849-2024-supplement.pdf]

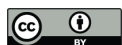

*Supplement of*

## **IMK–IAA MIPAS retrieval version 8: CH<sub>4</sub> and N<sub>2</sub>O**

**Norbert Glatthor et al.**

*Correspondence to:* Norbert Glatthor (norbert.glatthor@kit.edu)

The copyright of individual parts of the supplement might differ from the article licence.

## S1 Overview

This document serves as reference for the definition of the representative atmospheres used for the calculation of methane and nitrous oxide error budgets, as listed in Tab. S0, and as collection of the respective error budgets for methane and nitrous oxide retrievals for different measurement modes and periods:

- Nominal measurement mode (NOM) CH<sub>4</sub> errors for the FR period (V8H\_CH4\_61, 2002-2004), which are listed in tables S1–S34 and depicted in figures S1–S34,
- Nominal measurement mode (NOM) CH<sub>4</sub> errors for the RR period (V8R\_CH4\_261, 2005-2012), which are listed in tables S35–S68 and depicted in figures S35–S68.
- 10 – Middle Atmosphere measurement mode (MA) CH<sub>4</sub> errors for the RR period (V8R\_CH4\_561, 2005-2012), which are listed in tables S69–S102 and depicted in figures S69–S102.
- Upper Atmosphere measurement mode (UA) CH<sub>4</sub> errors at low solar activity for the RR period (V8R\_CH4\_662, 2005-2012), which are listed in tables S103–S136 and depicted in figures S103–S136.
- 15 – Nominal measurement mode (NOM) N<sub>2</sub>O errors for the FR period (V8H\_N2O\_61, 2002-2004), which are listed in tables S137–S170 and depicted in figures S137–S170,
- Nominal measurement mode (NOM) N<sub>2</sub>O errors for the RR period (V8R\_N2O\_261, 2005-2012), which are listed in tables S171–S204 and depicted in figures S171–S204.
- 20 – Middle Atmosphere measurement mode (MA) N<sub>2</sub>O errors for the RR period (V8R\_N2O\_561, 2005-2012), which are listed in tables S205–S238 and depicted in figures S205–S238.
- Upper Atmosphere measurement mode (UA) N<sub>2</sub>O errors at low solar activity for the RR period (V8R\_N2O\_662, 2005-2012), which are listed in tables S239–S272 and depicted in figures S239–S272.

In the plots, the errors are presented as relative errors in percent, regardless of whether they are additive or multiplicative errors. They were calculated with respect to the average gas profiles that were calculated from the single geolocations which contribute to the respective representative atmospheres.

**Table S0.** Labels and definitions of the representative atmospheric conditions which were used to calculate the error budget. Daytime atmospheres are defined by solar zenith angles  $< 90^\circ$ . Nighttime atmospheres are defined by solar zenith angles  $> 95^\circ$  for NOM observations,  $> 98^\circ$  for MA observations, and  $> 100^\circ$  for UA observations.

| representative atmosphere label   | month(s) used | latitude range                        |
|-----------------------------------|---------------|---------------------------------------|
| Northern polar winter day         | Jan, Feb      | $65^\circ\text{N} - 90^\circ\text{N}$ |
| Northern polar winter night       | Jan, Feb      | $65^\circ\text{N} - 90^\circ\text{N}$ |
| Northern polar spring day         | Apr           | $65^\circ\text{N} - 90^\circ\text{N}$ |
| Northern polar spring night       | Apr           | $65^\circ\text{N} - 90^\circ\text{N}$ |
| Northern polar summer day         | Jul, Aug      | $65^\circ\text{N} - 90^\circ\text{N}$ |
| Northern polar summer night       | Jul, Aug      | $65^\circ\text{N} - 90^\circ\text{N}$ |
| Northern polar autumn day         | Oct           | $65^\circ\text{N} - 90^\circ\text{N}$ |
| Northern polar autumn night       | Oct           | $65^\circ\text{N} - 90^\circ\text{N}$ |
| Northern midlatitude winter day   | Jan, Feb      | $40^\circ\text{N} - 60^\circ\text{N}$ |
| Northern midlatitude winter night | Jan, Feb      | $40^\circ\text{N} - 60^\circ\text{N}$ |
| Northern midlatitude spring day   | Apr           | $40^\circ\text{N} - 60^\circ\text{N}$ |
| Northern midlatitude spring night | Apr           | $40^\circ\text{N} - 60^\circ\text{N}$ |
| Northern midlatitude summer day   | Jul, Aug      | $40^\circ\text{N} - 60^\circ\text{N}$ |
| Northern midlatitude summer night | Jul, Aug      | $40^\circ\text{N} - 60^\circ\text{N}$ |
| Northern midlatitude autumn day   | Oct           | $40^\circ\text{N} - 60^\circ\text{N}$ |
| Northern midlatitude autumn night | Oct           | $40^\circ\text{N} - 60^\circ\text{N}$ |
| Tropics day                       | Apr           | $20^\circ\text{S} - 20^\circ\text{N}$ |
| Tropics night                     | Apr           | $20^\circ\text{S} - 20^\circ\text{N}$ |
| Southern midlatitude winter day   | Jul, Aug      | $40^\circ\text{S} - 60^\circ\text{S}$ |
| Southern midlatitude winter night | Jul, Aug      | $40^\circ\text{S} - 60^\circ\text{S}$ |
| Southern midlatitude spring day   | Oct           | $40^\circ\text{S} - 60^\circ\text{S}$ |
| Southern midlatitude spring night | Oct           | $40^\circ\text{S} - 60^\circ\text{S}$ |
| Southern midlatitude summer day   | Jan, Feb      | $40^\circ\text{S} - 60^\circ\text{S}$ |
| Southern midlatitude summer night | Jan, Feb      | $40^\circ\text{S} - 60^\circ\text{S}$ |
| Southern midlatitude autumn day   | Apr           | $40^\circ\text{S} - 60^\circ\text{S}$ |
| Southern midlatitude autumn night | Apr           | $40^\circ\text{S} - 60^\circ\text{S}$ |
| Southern polar winter day         | Jul, Aug      | $65^\circ\text{S} - 90^\circ\text{S}$ |
| Southern polar winter night       | Jul, Aug      | $65^\circ\text{S} - 90^\circ\text{S}$ |
| Southern polar spring day         | Oct           | $65^\circ\text{S} - 90^\circ\text{S}$ |
| Southern polar spring night       | Oct           | $65^\circ\text{S} - 90^\circ\text{S}$ |
| Southern polar summer day         | Jan, Feb      | $65^\circ\text{S} - 90^\circ\text{S}$ |
| Southern polar summer night       | Jan, Feb      | $65^\circ\text{S} - 90^\circ\text{S}$ |
| Southern polar autumn day         | Apr           | $65^\circ\text{S} - 90^\circ\text{S}$ |
| Southern polar autumn night       | Apr           | $65^\circ\text{S} - 90^\circ\text{S}$ |

**Table S1.** Methane error budget for Northern polar winter day. All uncertainties are  $1\sigma$ .

| altitude<br>(km) | mean target<br>(ppbv) | interf<br>(ppbv) | ILS<br>(ppbv) | shift<br>(ppbv) | offset<br>(ppbv) | gain<br>(ppbv) | spectro<br>(ppbv) | T+LOS<br>(ppbv) | noise<br>(ppbv) | random<br>(ppbv) | syst<br>(ppbv) | total<br>(ppbv) |
|------------------|-----------------------|------------------|---------------|-----------------|------------------|----------------|-------------------|-----------------|-----------------|------------------|----------------|-----------------|
| 9                | 1703.54               | 25.61            | 11.15         | 1.50            | 25.12            | 62.87          | 253.64            | 38.68           | 72.17           | 149.18           | 232.70         | 276.41          |
| 12               | 1689.48               | 7.85             | 19.93         | 1.77            | 12.68            | 54.18          | 346.12            | 32.57           | 38.02           | 77.32            | 346.25         | 354.78          |
| 15               | 1546.57               | 11.61            | 46.55         | 5.17            | 15.48            | 71.62          | 293.79            | 46.95           | 47.49           | 113.99           | 292.37         | 313.80          |
| 18               | 1261.38               | 3.30             | 55.36         | 5.70            | 12.23            | 85.18          | 269.25            | 36.65           | 37.93           | 122.53           | 266.04         | 292.90          |
| 21               | 972.43                | 1.89             | 44.42         | 10.23           | 13.93            | 83.25          | 253.48            | 28.11           | 35.38           | 133.27           | 240.29         | 274.77          |
| 24               | 891.76                | 1.21             | 23.75         | 6.40            | 13.12            | 69.03          | 243.85            | 19.11           | 30.95           | 129.84           | 222.43         | 257.55          |
| 27               | 919.91                | 1.61             | 12.70         | 3.24            | 10.31            | 37.08          | 221.82            | 17.10           | 30.17           | 104.92           | 202.61         | 228.17          |
| 30               | 891.22                | 0.88             | 10.08         | 2.49            | 8.34             | 23.07          | 232.18            | 17.82           | 25.09           | 84.31            | 220.13         | 235.73          |
| 33               | 644.05                | 0.67             | 12.34         | 1.91            | 7.12             | 14.08          | 168.43            | 13.48           | 22.21           | 73.51            | 155.07         | 171.61          |
| 36               | 520.89                | 0.50             | 6.53          | 1.57            | 6.57             | 23.14          | 123.16            | 8.80            | 20.51           | 45.57            | 119.22         | 127.63          |
| 39               | 505.17                | 0.51             | 15.12         | 2.46            | 7.73             | 35.39          | 113.54            | 8.36            | 19.40           | 41.30            | 114.80         | 122.01          |
| 42               | 496.82                | 0.38             | 10.56         | 2.08            | 7.51             | 39.17          | 112.85            | 7.57            | 16.45           | 44.68            | 113.02         | 121.53          |
| 45               | 419.88                | 0.80             | 9.01          | 2.27            | 6.88             | 33.19          | 93.62             | 7.59            | 17.54           | 46.72            | 90.46          | 101.81          |
| 48               | 371.87                | 0.26             | 5.74          | 2.98            | 5.28             | 23.35          | 85.32             | 7.18            | 12.56           | 36.00            | 82.51          | 90.02           |
| 52               | 305.45                | 0.25             | 9.25          | 2.78            | 5.77             | 25.25          | 74.87             | 6.44            | 9.88            | 34.78            | 72.79          | 80.67           |
| 56               | 192.88                | 0.31             | 6.78          | 2.93            | 4.53             | 15.51          | 53.37             | 5.14            | 11.70           | 31.20            | 48.51          | 57.68           |
| 60               | 125.45                | 0.11             | 1.79          | 0.97            | 2.04             | 3.91           | 32.98             | 2.92            | 9.51            | 18.29            | 29.60          | 34.79           |
| 64               | 47.20                 | 0.21             | 1.56          | 2.12            | 2.83             | 7.74           | 24.50             | 2.71            | 9.82            | 20.03            | 19.44          | 27.91           |
| 68               | 17.62                 | 0.09             | 0.87          | 1.01            | 4.36             | 2.68           | 13.73             | 1.25            | 19.34           | 22.52            | 9.21           | 24.33           |

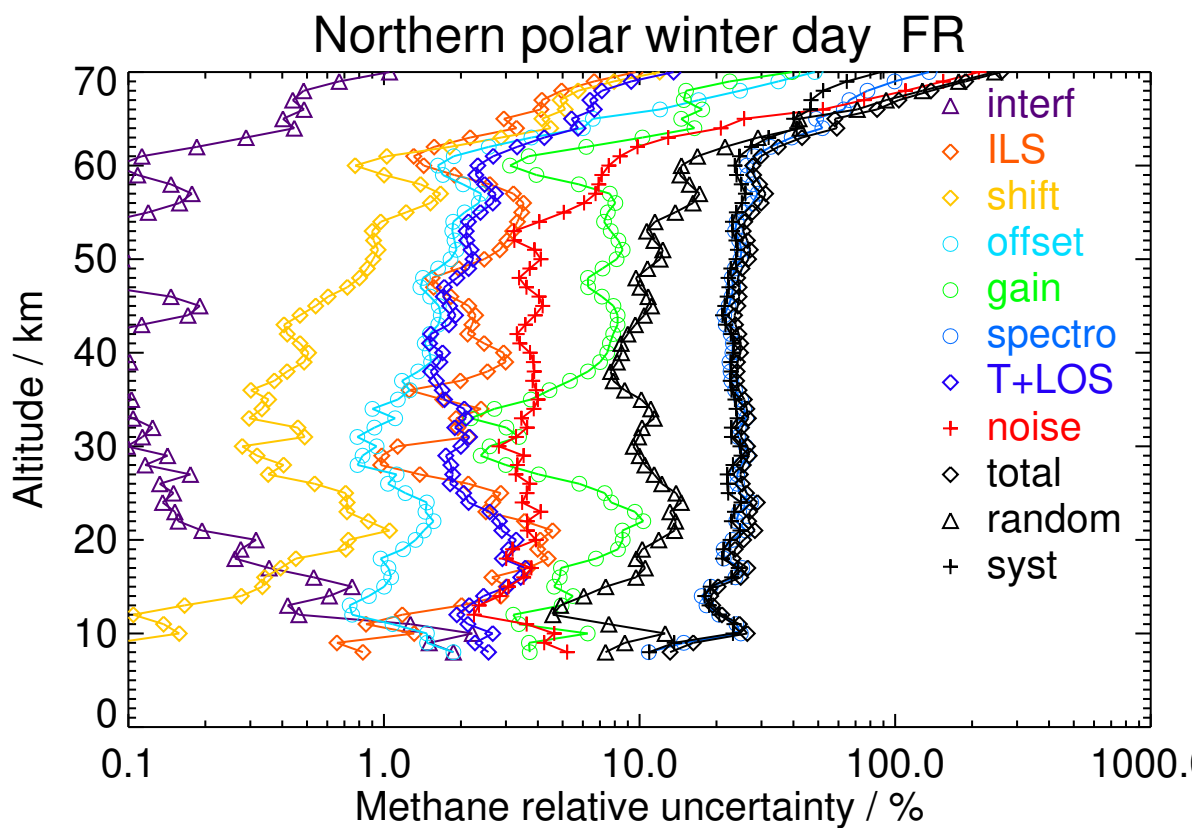

**Figure S1.** V8H\_CH4\_61 Northern polar winter day



**Table S2.** Methane error budget for Northern polar winter night. All uncertainties are  $1\sigma$ .

| altitude<br>(km) | mean target<br>(ppbv) | interf<br>(ppbv) | ILS<br>(ppbv) | shift<br>(ppbv) | offset<br>(ppbv) | gain<br>(ppbv) | spectro<br>(ppbv) | T+LOS<br>(ppbv) | noise<br>(ppbv) | random<br>(ppbv) | syst<br>(ppbv) | total<br>(ppbv) |
|------------------|-----------------------|------------------|---------------|-----------------|------------------|----------------|-------------------|-----------------|-----------------|------------------|----------------|-----------------|
| 9                | 1720.51               | 30.07            | 8.67          | 1.51            | 22.64            | 55.72          | 284.90            | 34.93           | 66.84           | 151.80           | 261.56         | 302.42          |
| 12               | 1716.84               | 13.54            | 39.45         | 2.95            | 15.56            | 71.48          | 352.73            | 39.15           | 44.31           | 90.96            | 356.00         | 367.44          |
| 15               | 1534.28               | 15.99            | 59.97         | 4.42            | 17.95            | 70.96          | 291.15            | 48.35           | 53.82           | 111.94           | 294.45         | 315.01          |
| 18               | 1227.13               | 4.04             | 55.19         | 5.60            | 13.02            | 68.73          | 277.16            | 42.56           | 41.82           | 122.84           | 270.69         | 297.26          |
| 21               | 886.53                | 3.78             | 39.15         | 6.84            | 12.26            | 55.70          | 229.38            | 25.41           | 38.79           | 124.22           | 210.20         | 244.16          |
| 24               | 827.44                | 1.29             | 29.98         | 5.47            | 9.71             | 34.67          | 228.38            | 17.22           | 34.40           | 111.46           | 208.42         | 236.35          |
| 27               | 775.47                | 2.09             | 9.28          | 2.75            | 8.73             | 24.98          | 222.31            | 14.84           | 31.73           | 133.43           | 183.41         | 226.82          |
| 30               | 735.55                | 0.91             | 10.87         | 1.43            | 7.62             | 11.59          | 218.71            | 13.84           | 26.77           | 110.23           | 192.11         | 221.49          |
| 33               | 563.72                | 0.92             | 8.87          | 1.55            | 6.54             | 16.75          | 147.81            | 10.74           | 21.68           | 63.74            | 137.03         | 151.12          |
| 36               | 457.74                | 0.59             | 8.86          | 1.28            | 5.45             | 21.36          | 110.52            | 6.99            | 17.49           | 37.29            | 108.37         | 114.61          |
| 39               | 377.61                | 0.47             | 12.02         | 1.48            | 4.84             | 21.04          | 86.37             | 5.57            | 14.81           | 31.99            | 85.44          | 91.23           |
| 42               | 376.38                | 0.41             | 7.93          | 1.56            | 3.77             | 16.91          | 88.00             | 4.78            | 13.27           | 32.08            | 85.32          | 91.15           |
| 45               | 367.66                | 0.86             | 12.36         | 1.60            | 5.07             | 23.77          | 79.39             | 5.87            | 15.87           | 42.36            | 74.44          | 85.65           |
| 48               | 331.72                | 0.32             | 5.29          | 2.06            | 2.75             | 12.20          | 75.87             | 4.65            | 9.92            | 33.95            | 70.08          | 77.88           |
| 52               | 257.99                | 0.21             | 5.17          | 1.58            | 3.11             | 10.81          | 61.78             | 4.32            | 9.56            | 25.22            | 58.71          | 63.89           |
| 56               | 200.97                | 0.38             | 4.56          | 3.66            | 5.24             | 19.04          | 52.84             | 5.19            | 12.27           | 33.90            | 47.38          | 58.25           |
| 60               | 173.53                | 0.17             | 1.53          | 1.38            | 2.78             | 5.28           | 41.53             | 4.47            | 12.17           | 18.49            | 39.89          | 43.96           |
| 64               | 117.17                | 0.33             | 1.78          | 2.15            | 3.79             | 10.19          | 40.23             | 4.65            | 14.04           | 22.73            | 38.03          | 44.31           |
| 68               | 77.60                 | 0.28             | 2.09          | 1.70            | 6.50             | 10.91          | 33.59             | 4.44            | 28.07           | 35.02            | 29.63          | 45.88           |

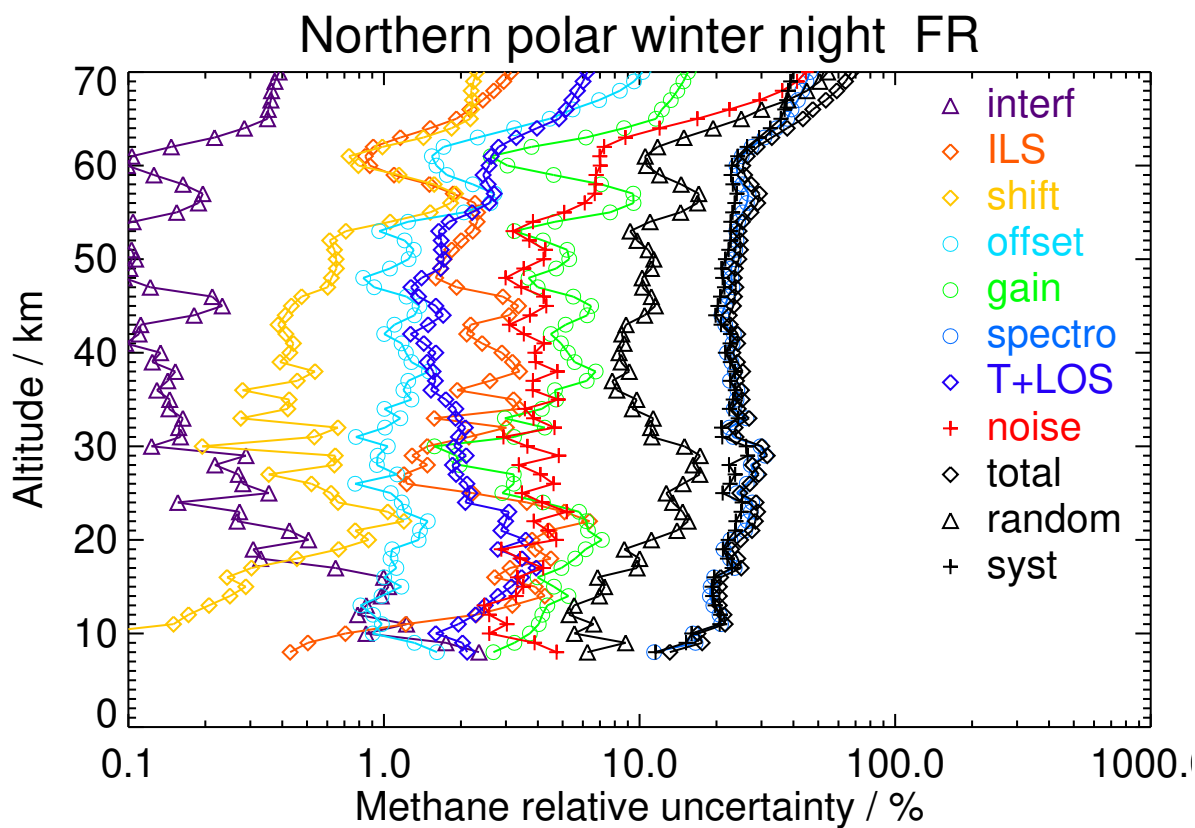

**Figure S2.** V8H\_CH4\_61 Northern polar winter night

**Table S3.** Methane error budget for Northern polar spring day. All uncertainties are  $1\sigma$ .

| altitude<br>(km) | mean target<br>(ppbv) | interf<br>(ppbv) | ILS<br>(ppbv) | shift<br>(ppbv) | offset<br>(ppbv) | gain<br>(ppbv) | spectro<br>(ppbv) | T+LOS<br>(ppbv) | noise<br>(ppbv) | random<br>(ppbv) | syst<br>(ppbv) | total<br>(ppbv) |
|------------------|-----------------------|------------------|---------------|-----------------|------------------|----------------|-------------------|-----------------|-----------------|------------------|----------------|-----------------|
| 9                | 1472.87               | 10.75            | 7.89          | 2.41            | 26.35            | 90.45          | 466.92            | 49.76           | 93.01           | 115.75           | 474.14         | 488.06          |
| 12               | 1711.14               | 4.43             | 24.96         | 1.38            | 12.90            | 112.77         | 296.52            | 35.92           | 39.84           | 72.58            | 314.74         | 323.00          |
| 15               | 1233.92               | 4.63             | 39.02         | 3.61            | 12.16            | 53.16          | 277.33            | 43.62           | 46.06           | 104.34           | 273.09         | 292.34          |
| 18               | 994.93                | 1.99             | 46.39         | 4.05            | 9.87             | 57.44          | 204.24            | 32.33           | 33.44           | 95.61            | 200.76         | 222.37          |
| 21               | 754.75                | 1.10             | 43.23         | 9.36            | 9.46             | 47.54          | 204.15            | 21.75           | 31.93           | 111.63           | 187.12         | 217.89          |
| 24               | 914.29                | 1.14             | 40.26         | 8.13            | 7.48             | 32.66          | 221.97            | 19.29           | 32.30           | 97.74            | 209.63         | 231.29          |
| 27               | 845.10                | 1.00             | 18.21         | 4.98            | 6.30             | 18.95          | 214.67            | 16.65           | 30.34           | 82.86            | 202.90         | 219.17          |
| 30               | 817.18                | 1.14             | 33.41         | 2.90            | 5.54             | 20.69          | 189.73            | 16.36           | 26.93           | 63.16            | 185.98         | 196.41          |
| 33               | 754.48                | 0.64             | 13.33         | 4.00            | 5.13             | 19.79          | 162.34            | 12.59           | 22.74           | 51.98            | 157.92         | 166.26          |
| 36               | 687.33                | 0.51             | 12.13         | 2.91            | 4.96             | 23.49          | 142.47            | 9.14            | 19.43           | 41.10            | 140.71         | 146.59          |
| 39               | 538.39                | 0.67             | 19.47         | 4.31            | 4.87             | 21.39          | 117.57            | 7.79            | 17.64           | 39.15            | 116.37         | 122.78          |
| 42               | 422.65                | 0.44             | 17.64         | 3.48            | 4.44             | 23.10          | 93.45             | 5.19            | 13.57           | 36.26            | 92.22          | 99.10           |
| 45               | 328.14                | 1.06             | 18.10         | 4.00            | 5.17             | 25.22          | 95.36             | 6.70            | 20.55           | 41.09            | 94.24          | 102.81          |
| 48               | 292.41                | 0.48             | 6.86          | 4.63            | 5.63             | 34.09          | 71.85             | 7.37            | 14.35           | 43.68            | 69.12          | 81.76           |
| 52               | 155.78                | 0.14             | 4.00          | 1.42            | 2.47             | 11.69          | 41.51             | 2.39            | 6.04            | 21.86            | 38.06          | 43.89           |
| 56               | 154.29                | 0.29             | 7.19          | 3.19            | 3.88             | 17.43          | 33.23             | 3.63            | 10.77           | 28.50            | 28.31          | 40.17           |
| 60               | 111.94                | 0.10             | 2.89          | 1.79            | 1.36             | 4.30           | 29.61             | 2.31            | 5.40            | 11.46            | 28.49          | 30.71           |
| 64               | 23.41                 | 0.49             | 2.90          | 5.68            | 4.78             | 18.87          | 36.67             | 4.50            | 10.13           | 19.13            | 39.00          | 43.44           |
| 68               | 44.98                 | 0.09             | 0.45          | 0.50            | 2.35             | 2.25           | 9.95              | 0.84            | 9.90            | 11.58            | 8.65           | 14.45           |

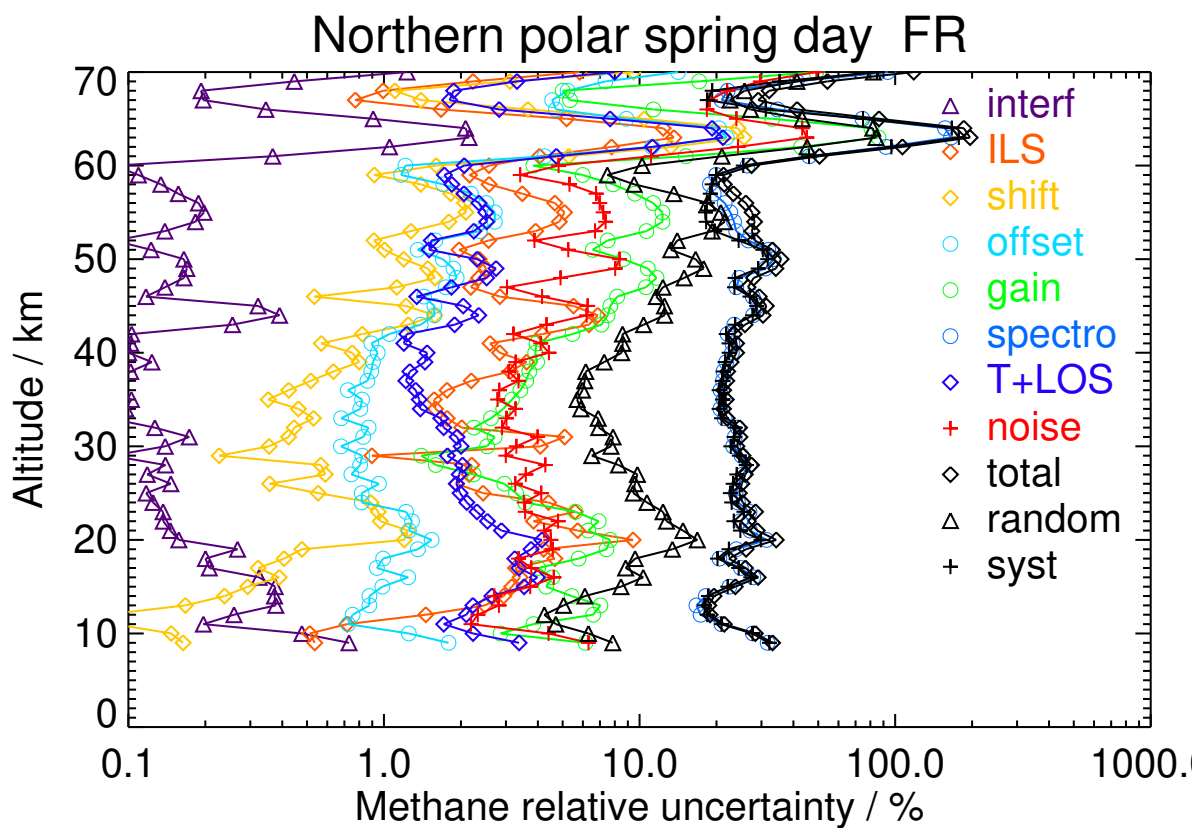

**Figure S3.** V8H\_CH4\_61 Northern polar spring day

**Table S4.** Methane error budget for Northern polar spring night. All uncertainties are  $1\sigma$ .

| altitude<br>(km) | mean target<br>(ppbv) | interf<br>(ppbv) | ILS<br>(ppbv) | shift<br>(ppbv) | offset<br>(ppbv) | gain<br>(ppbv) | spectro<br>(ppbv) | T+LOS<br>(ppbv) | noise<br>(ppbv) | random<br>(ppbv) | syst<br>(ppbv) | total<br>(ppbv) |
|------------------|-----------------------|------------------|---------------|-----------------|------------------|----------------|-------------------|-----------------|-----------------|------------------|----------------|-----------------|
| 9                | 1482.32               | 13.83            | 3.93          | 2.62            | 25.49            | 109.31         | 405.09            | 45.86           | 86.96           | 217.21           | 373.35         | 431.94          |
| 12               | 1670.88               | 3.78             | 18.98         | 1.57            | 11.57            | 97.14          | 310.12            | 34.08           | 37.75           | 72.96            | 321.53         | 329.70          |
| 15               | 1349.32               | 4.69             | 31.49         | 3.12            | 12.36            | 57.50          | 303.31            | 44.04           | 45.45           | 110.42           | 297.14         | 316.99          |
| 18               | 1126.54               | 1.80             | 41.09         | 4.64            | 11.18            | 72.67          | 223.81            | 32.25           | 34.18           | 104.87           | 220.04         | 243.76          |
| 21               | 872.62                | 1.38             | 47.63         | 12.70           | 9.69             | 50.19          | 236.42            | 23.47           | 30.94           | 133.08           | 211.52         | 249.90          |
| 24               | 1001.51               | 1.03             | 28.33         | 7.38            | 9.18             | 50.46          | 244.86            | 19.23           | 30.90           | 108.36           | 230.28         | 254.50          |
| 27               | 933.61                | 0.85             | 18.81         | 4.84            | 6.94             | 20.67          | 237.51            | 17.36           | 29.01           | 90.75            | 223.99         | 241.67          |
| 30               | 842.72                | 1.01             | 24.39         | 3.35            | 5.44             | 14.82          | 202.15            | 16.39           | 24.88           | 68.45            | 194.74         | 206.42          |
| 33               | 734.69                | 0.61             | 12.26         | 3.75            | 5.06             | 18.81          | 157.07            | 13.03           | 21.39           | 53.43            | 151.61         | 160.75          |
| 36               | 596.17                | 0.55             | 10.39         | 2.84            | 5.14             | 22.95          | 124.78            | 8.97            | 18.70           | 47.57            | 120.02         | 129.11          |
| 39               | 477.95                | 0.68             | 17.88         | 4.42            | 4.77             | 19.20          | 104.15            | 7.27            | 16.55           | 35.15            | 103.30         | 109.11          |
| 42               | 355.17                | 0.28             | 10.76         | 2.60            | 3.79             | 16.94          | 81.63             | 4.19            | 13.38           | 32.49            | 78.92          | 85.35           |
| 45               | 269.70                | 0.86             | 18.08         | 3.61            | 4.71             | 19.09          | 83.98             | 6.15            | 21.52           | 39.05            | 82.20          | 91.00           |
| 48               | 233.75                | 0.40             | 6.35          | 4.26            | 4.77             | 25.97          | 51.53             | 5.79            | 14.11           | 33.79            | 50.02          | 60.36           |
| 52               | 158.71                | 0.13             | 4.07          | 0.87            | 1.93             | 9.19           | 41.48             | 1.97            | 6.22            | 20.22            | 38.21          | 43.23           |
| 56               | 119.84                | 0.39             | 4.61          | 4.34            | 4.16             | 14.69          | 35.83             | 3.87            | 11.71           | 30.09            | 28.36          | 41.35           |
| 60               | 84.69                 | 0.07             | 2.07          | 1.07            | 1.05             | 2.91           | 23.75             | 1.71            | 4.82            | 11.33            | 21.84          | 24.61           |
| 64               | 36.18                 | 0.38             | 2.57          | 3.86            | 3.67             | 13.03          | 28.11             | 3.40            | 9.25            | 16.87            | 28.42          | 33.05           |
| 68               | 29.59                 | 0.09             | 0.45          | 0.49            | 2.57             | 1.93           | 10.24             | 0.89            | 10.95           | 13.38            | 7.57           | 15.37           |

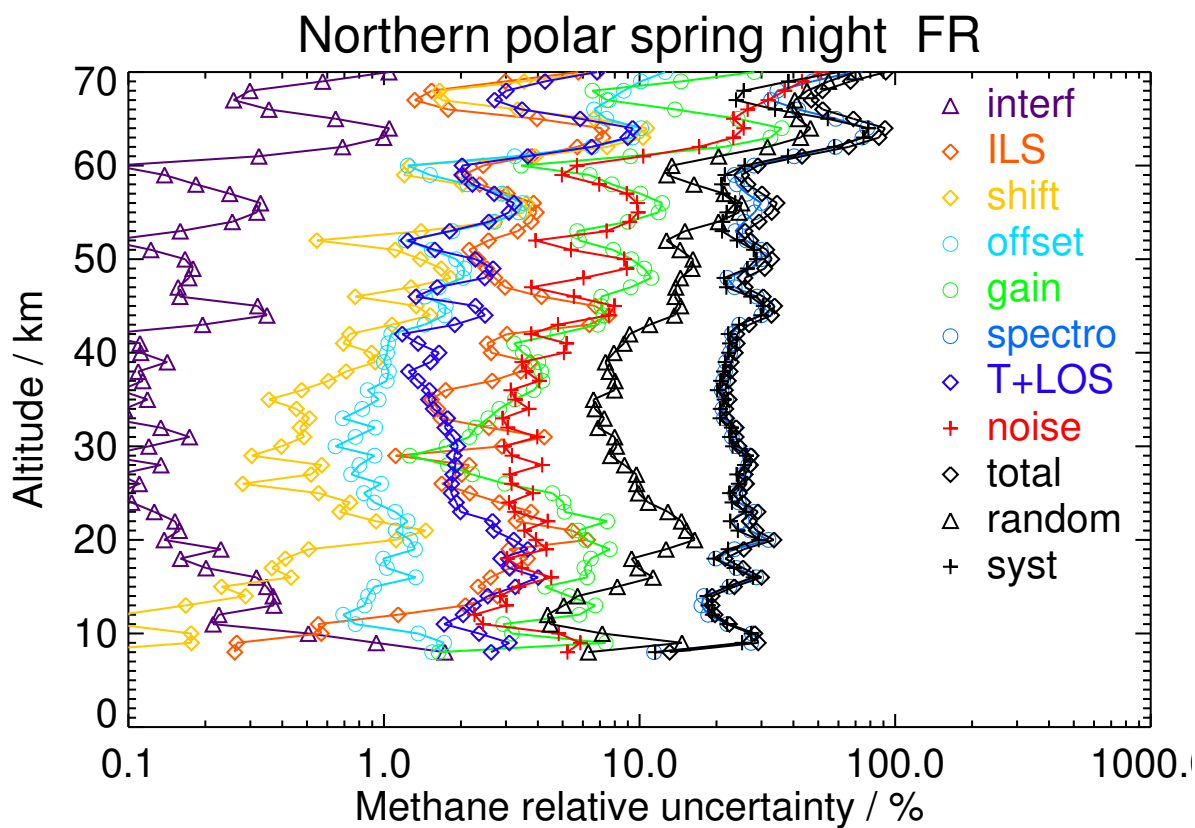

**Figure S4.** V8H\_CH4\_61 Northern polar spring night

**Table S5.** Methane error budget for Northern polar summer day. All uncertainties are  $1\sigma$ .

| altitude<br>(km) | mean target<br>(ppbv) | interf<br>(ppbv) | ILS<br>(ppbv) | shift<br>(ppbv) | offset<br>(ppbv) | gain<br>(ppbv) | spectro<br>(ppbv) | T+LOS<br>(ppbv) | noise<br>(ppbv) | random<br>(ppbv) | syst<br>(ppbv) | total<br>(ppbv) |
|------------------|-----------------------|------------------|---------------|-----------------|------------------|----------------|-------------------|-----------------|-----------------|------------------|----------------|-----------------|
| 9                | 1483.67               | 14.03            | 24.48         | 3.85            | 23.27            | 82.69          | 541.35            | 38.94           | 85.51           | 98.94            | 547.98         | 556.84          |
| 12               | 1719.42               | 4.08             | 15.62         | 1.83            | 12.30            | 60.81          | 405.31            | 28.16           | 42.95           | 104.62           | 400.10         | 413.55          |
| 15               | 1800.21               | 6.29             | 79.33         | 4.83            | 14.88            | 143.45         | 299.17            | 42.17           | 42.37           | 98.65            | 332.42         | 346.75          |
| 18               | 1519.17               | 1.63             | 47.69         | 3.17            | 11.31            | 96.85          | 341.60            | 39.13           | 37.30           | 103.99           | 347.26         | 362.50          |
| 21               | 1268.03               | 0.97             | 54.22         | 11.62           | 13.79            | 109.88         | 314.82            | 34.87           | 33.91           | 122.76           | 318.97         | 341.78          |
| 24               | 1173.55               | 0.94             | 25.87         | 4.97            | 10.94            | 69.84          | 288.62            | 23.75           | 32.26           | 83.14            | 289.29         | 301.00          |
| 27               | 996.46                | 1.24             | 10.80         | 6.11            | 7.81             | 16.10          | 234.35            | 18.94           | 29.92           | 45.24            | 233.68         | 238.02          |
| 30               | 867.78                | 0.78             | 12.12         | 2.27            | 6.54             | 10.08          | 219.46            | 15.92           | 26.52           | 43.26            | 218.05         | 222.30          |
| 33               | 742.96                | 1.00             | 16.83         | 4.35            | 6.05             | 20.82          | 167.96            | 12.47           | 22.49           | 35.42            | 168.50         | 172.18          |
| 36               | 595.57                | 0.68             | 5.97          | 1.44            | 5.03             | 15.91          | 128.73            | 8.80            | 20.31           | 28.65            | 128.67         | 131.83          |
| 39               | 454.96                | 0.62             | 15.99         | 2.94            | 4.23             | 14.17          | 95.70             | 5.70            | 17.84           | 27.63            | 96.07          | 99.96           |
| 42               | 335.19                | 0.43             | 8.27          | 2.30            | 3.14             | 6.98           | 79.05             | 4.87            | 19.26           | 27.23            | 77.68          | 82.31           |
| 45               | 267.96                | 1.14             | 18.81         | 3.90            | 3.97             | 18.50          | 91.40             | 6.55            | 21.27           | 39.86            | 89.38          | 97.87           |
| 48               | 171.99                | 0.39             | 3.94          | 1.50            | 2.75             | 16.40          | 32.56             | 2.47            | 8.71            | 18.20            | 33.25          | 37.90           |
| 52               | 124.33                | 0.28             | 1.91          | 1.28            | 1.92             | 9.10           | 37.10             | 2.08            | 10.46           | 15.09            | 36.80          | 39.77           |
| 56               | 72.38                 | 0.30             | 6.82          | 1.78            | 2.27             | 7.31           | 17.47             | 2.25            | 11.27           | 15.67            | 17.32          | 23.36           |
| 60               | 97.60                 | 0.10             | 1.53          | 0.97            | 1.33             | 5.78           | 20.20             | 1.23            | 4.29            | 7.07             | 20.40          | 21.59           |
| 64               | 91.41                 | 0.36             | 2.19          | 3.99            | 2.95             | 11.39          | 39.16             | 2.73            | 8.41            | 12.74            | 40.11          | 42.09           |
| 68               | 134.90                | 0.18             | 0.95          | 1.79            | 2.55             | 2.76           | 33.89             | 2.09            | 11.31           | 13.87            | 33.27          | 36.05           |

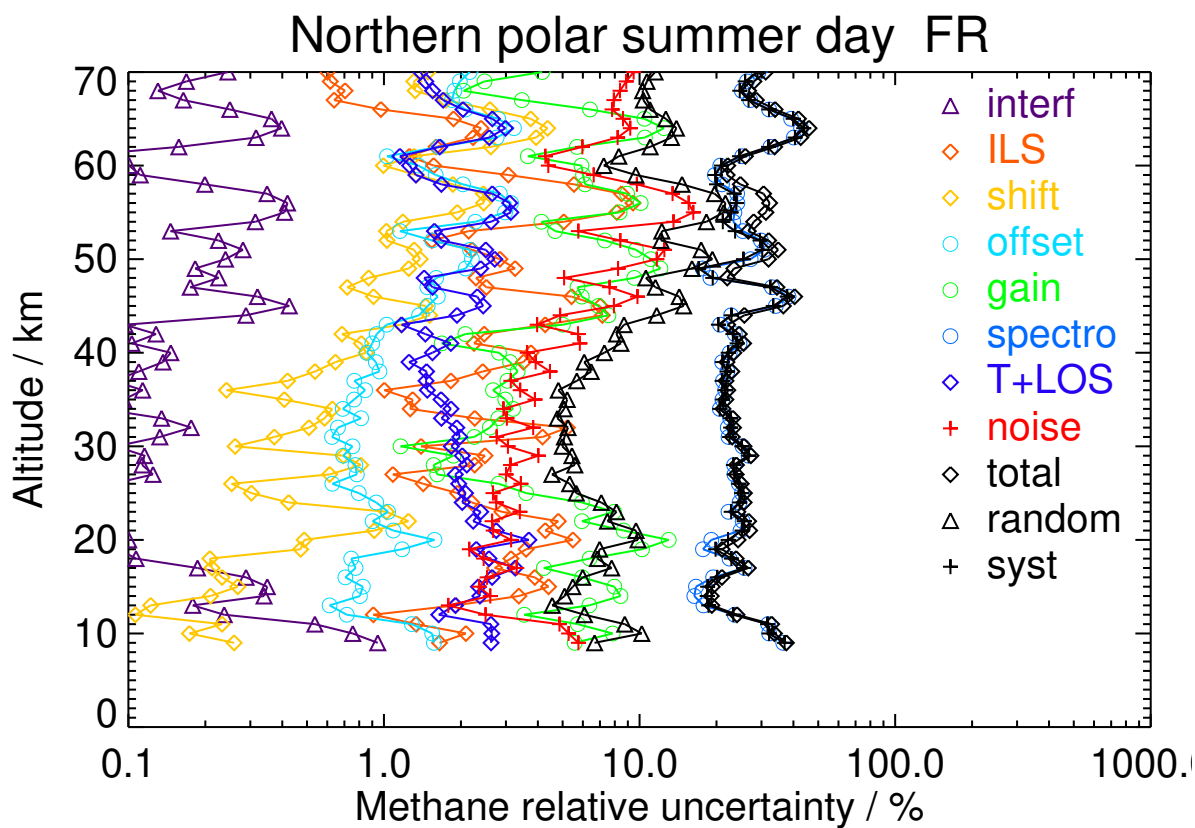

**Figure S5.** V8H\_CH4\_61 Northern polar summer day

**Table S6.** Methane error budget for Northern polar summer night. All uncertainties are  $1\sigma$ .

| altitude (km) | mean target (ppbv) | interf (ppbv) | ILS (ppbv) | shift (ppbv) | offset (ppbv) | gain (ppbv) | spectro (ppbv) | T+LOS (ppbv) | noise (ppbv) | random (ppbv) | syst (ppbv) | total (ppbv) |
|---------------|--------------------|---------------|------------|--------------|---------------|-------------|----------------|--------------|--------------|---------------|-------------|--------------|
| 12            | 1682.03            | 4.79          | 15.34      | 1.68         | 14.18         | 33.97       | 420.33         | 28.00        | 50.30        | 76.58         | 419.22      | 426.16       |
| 15            | 1836.17            | 6.49          | 73.07      | 3.77         | 14.56         | 127.10      | 295.33         | 37.58        | 42.16        | 91.81         | 322.09      | 334.92       |
| 18            | 1537.59            | 1.76          | 48.58      | 1.60         | 12.95         | 101.30      | 357.64         | 39.56        | 38.65        | 109.33        | 363.06      | 379.16       |
| 21            | 1285.60            | 1.26          | 33.64      | 7.47         | 13.73         | 100.49      | 306.53         | 33.73        | 36.40        | 104.41        | 311.44      | 328.48       |
| 24            | 1140.41            | 1.10          | 27.01      | 4.70         | 9.45          | 43.47       | 286.38         | 21.62        | 32.86        | 65.63         | 286.33      | 293.75       |
| 27            | 1008.67            | 1.37          | 7.79       | 3.88         | 8.18          | 13.14       | 238.18         | 19.13        | 31.12        | 42.56         | 237.85      | 241.62       |
| 30            | 831.14             | 0.78          | 8.60       | 2.02         | 6.95          | 7.22        | 220.97         | 16.15        | 27.51        | 37.76         | 220.45      | 223.66       |
| 33            | 665.71             | 1.16          | 16.50      | 3.48         | 6.32          | 17.86       | 156.70         | 12.13        | 22.78        | 30.95         | 157.83      | 160.83       |
| 36            | 553.16             | 0.73          | 5.85       | 1.47         | 5.20          | 13.15       | 124.53         | 8.46         | 20.94        | 28.75         | 124.21      | 127.49       |
| 39            | 422.66             | 0.45          | 15.73      | 3.04         | 4.52          | 18.04       | 92.54          | 5.95         | 19.16        | 27.30         | 93.94       | 97.82        |
| 42            | 257.04             | 0.47          | 10.57      | 1.86         | 3.68          | 6.48        | 74.26          | 5.73         | 21.07        | 26.73         | 73.80       | 78.50        |
| 45            | 202.18             | 0.61          | 19.02      | 2.34         | 4.13          | 22.08       | 62.11          | 6.26         | 21.88        | 31.18         | 65.39       | 72.44        |
| 48            | 117.83             | 0.16          | 1.08       | 1.10         | 1.20          | 4.31        | 25.04          | 1.31         | 6.45         | 11.69         | 23.58       | 26.32        |
| 52            | 99.75              | 0.19          | 1.18       | 1.16         | 1.86          | 7.81        | 25.92          | 1.55         | 8.26         | 11.72         | 25.93       | 28.45        |
| 56            | 89.87              | 0.26          | 3.61       | 1.69         | 2.20          | 7.31        | 26.48          | 2.10         | 10.24        | 15.54         | 25.36       | 29.74        |
| 60            | 124.08             | 0.08          | 1.69       | 1.11         | 1.42          | 5.23        | 27.17          | 1.76         | 5.10         | 10.74         | 26.18       | 28.29        |
| 64            | 128.66             | 0.43          | 0.99       | 3.09         | 2.76          | 9.39        | 49.69          | 2.75         | 8.59         | 12.89         | 49.91       | 51.54        |
| 68            | 170.40             | 0.28          | 2.57       | 2.18         | 3.62          | 4.17        | 47.89          | 3.85         | 16.33        | 19.22         | 47.41       | 51.16        |

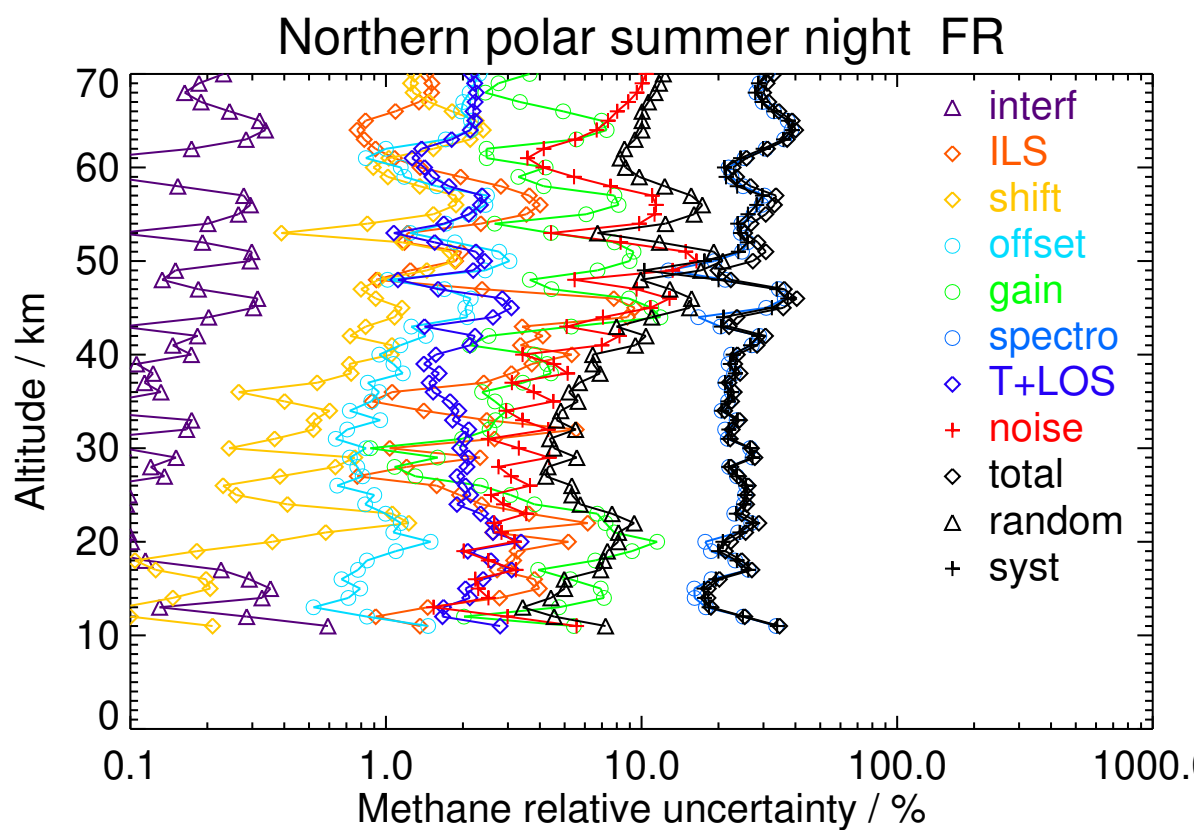

**Figure S6.** V8H\_CH4\_61 Northern polar summer night

**Table S7.** Methane error budget for Northern polar autumn day. All uncertainties are  $1\sigma$ .

| altitude<br>(km) | mean target<br>(ppbv) | interf<br>(ppbv) | ILS<br>(ppbv) | shift<br>(ppbv) | offset<br>(ppbv) | gain<br>(ppbv) | spectro<br>(ppbv) | T+LOS<br>(ppbv) | noise<br>(ppbv) | random<br>(ppbv) | syst<br>(ppbv) | total<br>(ppbv) |
|------------------|-----------------------|------------------|---------------|-----------------|------------------|----------------|-------------------|-----------------|-----------------|------------------|----------------|-----------------|
| 9                | 1662.66               | 57.33            | 13.57         | 2.11            | 26.92            | 91.20          | 407.76            | 45.71           | 90.21           | 177.58           | 396.84         | 434.76          |
| 12               | 1734.22               | 24.13            | 24.30         | 2.55            | 14.52            | 75.42          | 388.86            | 31.23           | 49.62           | 112.89           | 385.98         | 402.15          |
| 15               | 1670.62               | 8.24             | 34.37         | 3.31            | 13.05            | 74.05          | 381.58            | 51.33           | 51.61           | 116.26           | 379.87         | 397.26          |
| 18               | 1621.53               | 3.91             | 120.58        | 8.34            | 14.44            | 136.32         | 305.21            | 69.79           | 49.92           | 154.22           | 331.89         | 365.97          |
| 21               | 1382.36               | 3.73             | 60.15         | 6.35            | 17.56            | 119.48         | 254.18            | 44.79           | 47.42           | 96.91            | 278.79         | 295.16          |
| 24               | 1195.56               | 1.40             | 24.72         | 10.61           | 13.93            | 86.43          | 244.35            | 26.13           | 41.31           | 74.63            | 254.79         | 265.50          |
| 27               | 936.03                | 1.00             | 14.42         | 6.29            | 8.92             | 44.05          | 214.47            | 19.16           | 37.25           | 60.17            | 215.41         | 223.66          |
| 30               | 735.64                | 1.00             | 8.57          | 2.61            | 7.34             | 20.85          | 179.22            | 16.89           | 33.12           | 53.58            | 176.64         | 184.59          |
| 33               | 527.63                | 0.42             | 7.86          | 1.79            | 6.15             | 12.36          | 131.33            | 12.95           | 27.34           | 44.07            | 128.36         | 135.72          |
| 36               | 331.29                | 0.27             | 6.68          | 1.92            | 4.86             | 8.47           | 83.63             | 7.42            | 22.71           | 38.07            | 79.12          | 87.80           |
| 39               | 191.49                | 0.29             | 6.37          | 1.27            | 3.51             | 9.59           | 50.70             | 4.37            | 18.05           | 34.42            | 43.32          | 55.33           |
| 42               | 101.26                | 0.26             | 4.43          | 1.22            | 2.72             | 8.17           | 39.07             | 3.06            | 14.77           | 33.68            | 26.73          | 43.00           |
| 45               | 140.12                | 0.24             | 4.61          | 0.76            | 3.11             | 12.14          | 35.29             | 3.65            | 10.56           | 25.86            | 29.67          | 39.36           |
| 48               | 189.41                | 0.15             | 4.29          | 1.59            | 3.37             | 13.86          | 49.92             | 3.38            | 9.20            | 25.71            | 46.38          | 53.03           |
| 52               | 212.71                | 0.19             | 5.89          | 1.15            | 3.18             | 11.21          | 50.44             | 2.94            | 10.45           | 19.50            | 49.53          | 53.23           |
| 56               | 161.28                | 0.18             | 5.65          | 1.76            | 2.50             | 7.00           | 41.43             | 2.78            | 7.93            | 19.50            | 38.70          | 43.33           |
| 60               | 120.74                | 0.10             | 1.55          | 0.81            | 2.00             | 3.61           | 30.06             | 2.01            | 8.02            | 15.42            | 27.46          | 31.49           |
| 64               | 67.49                 | 0.17             | 1.34          | 1.20            | 2.03             | 4.87           | 25.21             | 2.05            | 7.07            | 16.13            | 21.46          | 26.84           |
| 68               | 41.55                 | 0.11             | 0.82          | 0.75            | 4.13             | 4.11           | 17.43             | 1.39            | 17.54           | 21.53            | 13.59          | 25.46           |

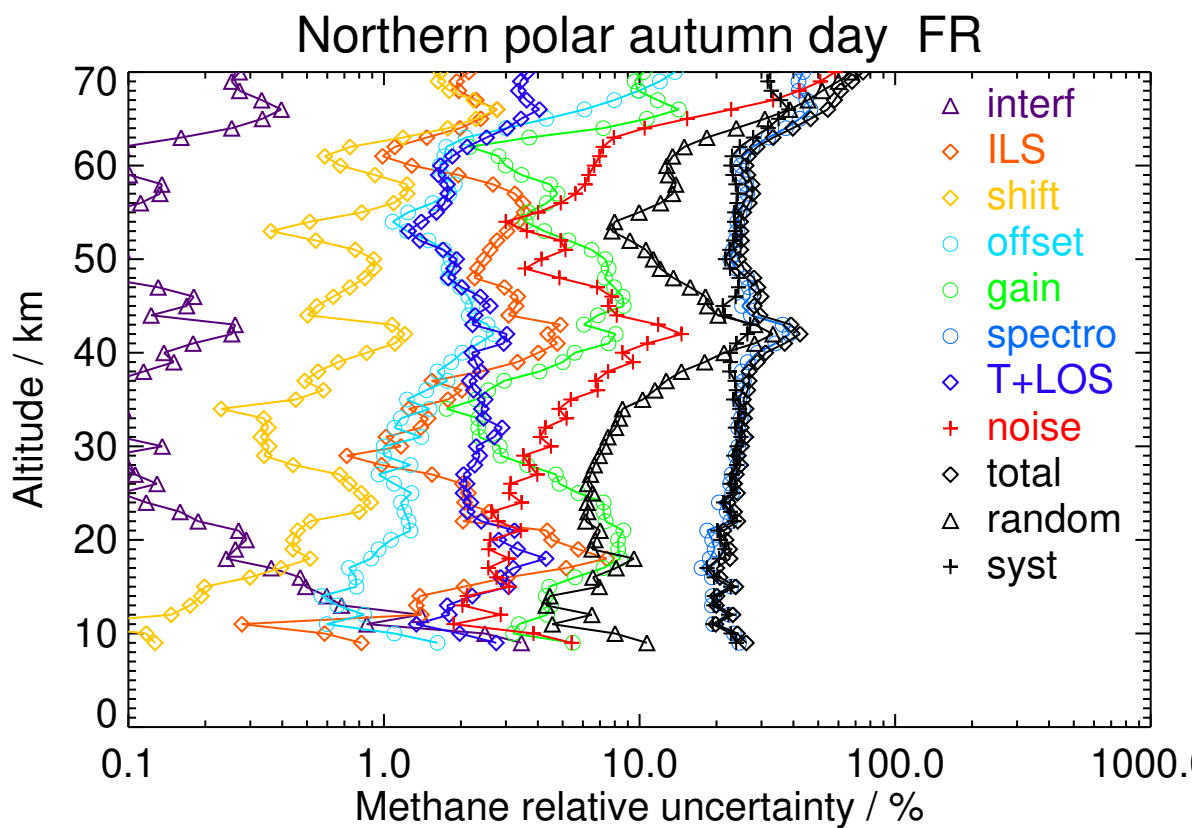

**Figure S7.** V8H\_CH4\_61 Northern polar autumn day

**Table S8.** Methane error budget for Northern polar autumn night. All uncertainties are  $1\sigma$ .

| altitude<br>(km) | mean target<br>(ppbv) | interf<br>(ppbv) | ILS<br>(ppbv) | shift<br>(ppbv) | offset<br>(ppbv) | gain<br>(ppbv) | spectro<br>(ppbv) | T+LOS<br>(ppbv) | noise<br>(ppbv) | random<br>(ppbv) | syst<br>(ppbv) | total<br>(ppbv) |
|------------------|-----------------------|------------------|---------------|-----------------|------------------|----------------|-------------------|-----------------|-----------------|------------------|----------------|-----------------|
| 9                | 1683.45               | 69.37            | 11.31         | 2.48            | 27.41            | 91.81          | 443.51            | 47.57           | 94.92           | 170.78           | 439.25         | 471.28          |
| 12               | 1740.74               | 26.13            | 19.28         | 2.63            | 13.27            | 75.55          | 369.94            | 30.52           | 44.72           | 103.67           | 368.76         | 383.05          |
| 15               | 1530.95               | 8.12             | 34.01         | 3.42            | 12.67            | 56.55          | 352.27            | 50.91           | 50.82           | 109.71           | 349.04         | 365.87          |
| 18               | 1540.36               | 3.67             | 97.78         | 7.80            | 13.16            | 121.73         | 289.60            | 70.00           | 50.69           | 143.20           | 308.97         | 340.54          |
| 21               | 1412.56               | 4.49             | 62.52         | 6.36            | 18.15            | 121.92         | 275.07            | 44.06           | 45.31           | 97.01            | 299.02         | 314.36          |
| 24               | 1144.66               | 1.84             | 25.15         | 11.86           | 13.09            | 80.14          | 259.34            | 25.55           | 39.75           | 70.12            | 268.23         | 277.24          |
| 27               | 856.76                | 1.31             | 11.72         | 6.05            | 8.07             | 37.22          | 206.92            | 18.85           | 35.50           | 55.89            | 207.21         | 214.62          |
| 30               | 686.12                | 0.87             | 12.18         | 2.37            | 6.46             | 20.84          | 166.60            | 17.20           | 31.89           | 55.20            | 163.25         | 172.33          |
| 33               | 484.51                | 0.40             | 7.35          | 1.36            | 5.36             | 8.99           | 124.49            | 13.29           | 26.39           | 42.14            | 121.49         | 128.59          |
| 36               | 289.45                | 0.28             | 6.46          | 2.12            | 4.51             | 9.37           | 78.84             | 7.19            | 21.99           | 39.22            | 73.26          | 83.10           |
| 39               | 178.44                | 0.28             | 6.67          | 1.27            | 3.39             | 10.83          | 50.69             | 4.33            | 17.32           | 33.05            | 44.39          | 55.35           |
| 42               | 115.61                | 0.22             | 3.27          | 0.99            | 2.59             | 7.89           | 35.17             | 3.31            | 14.23           | 26.57            | 28.72          | 39.13           |
| 45               | 136.43                | 0.20             | 2.95          | 0.65            | 2.65             | 10.47          | 30.89             | 3.63            | 10.05           | 18.71            | 29.06          | 34.56           |
| 48               | 168.08                | 0.16             | 2.42          | 1.07            | 2.37             | 8.46           | 39.61             | 2.79            | 8.44            | 14.67            | 38.95          | 41.62           |
| 52               | 183.38                | 0.19             | 3.59          | 1.11            | 2.62             | 6.44           | 46.25             | 2.31            | 10.63           | 16.55            | 45.23          | 48.16           |
| 56               | 164.42                | 0.25             | 4.74          | 1.79            | 3.40             | 9.97           | 39.50             | 3.02            | 8.81            | 21.20            | 36.53          | 42.24           |
| 60               | 113.88                | 0.16             | 1.62          | 1.10            | 2.50             | 5.55           | 30.02             | 2.22            | 8.55            | 18.10            | 26.31          | 31.94           |
| 64               | 68.25                 | 0.19             | 0.61          | 1.14            | 1.86             | 4.06           | 26.42             | 2.18            | 6.57            | 16.33            | 22.38          | 27.70           |
| 68               | 43.58                 | 0.15             | 0.67          | 0.89            | 4.29             | 4.32           | 18.50             | 1.73            | 18.13           | 21.42            | 15.92          | 26.69           |

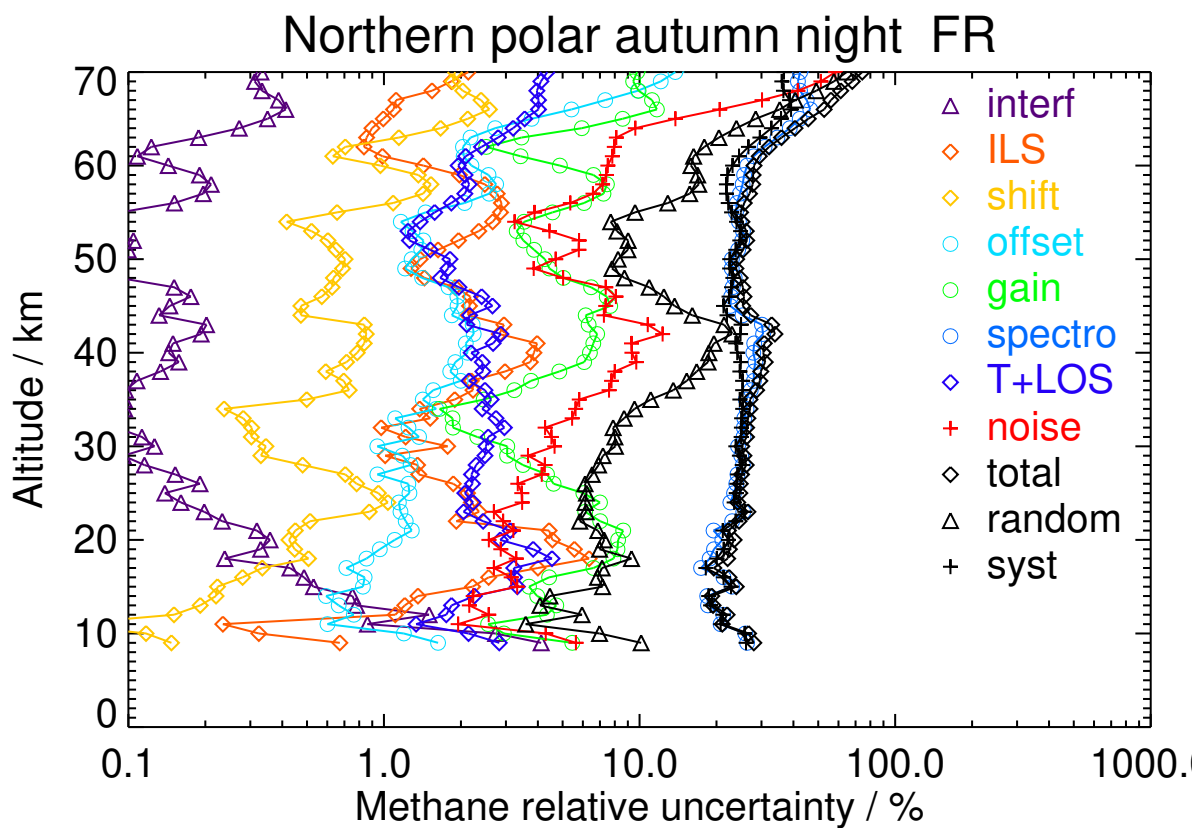

**Figure S8.** V8H\_CH4\_61 Northern polar autumn night



**Table S9.** Methane error budget for Northern midlatitude winter day. All uncertainties are  $1\sigma$ .

| altitude<br>(km) | mean target<br>(ppbv) | interf<br>(ppbv) | ILS<br>(ppbv) | shift<br>(ppbv) | offset<br>(ppbv) | gain<br>(ppbv) | spectro<br>(ppbv) | T+LOS<br>(ppbv) | noise<br>(ppbv) | random<br>(ppbv) | syst<br>(ppbv) | total<br>(ppbv) |
|------------------|-----------------------|------------------|---------------|-----------------|------------------|----------------|-------------------|-----------------|-----------------|------------------|----------------|-----------------|
| 9                | 1791.17               | 22.02            | 2.59          | 0.52            | 23.52            | 45.04          | 228.08            | 38.90           | 71.66           | 116.24           | 219.62         | 248.48          |
| 12               | 1657.78               | 3.63             | 13.98         | 1.24            | 12.65            | 33.48          | 365.43            | 28.77           | 39.13           | 76.82            | 362.61         | 370.66          |
| 15               | 1574.00               | 5.39             | 51.96         | 6.12            | 14.33            | 62.94          | 310.26            | 40.88           | 44.52           | 100.53           | 311.03         | 326.88          |
| 18               | 1444.43               | 1.63             | 43.88         | 4.52            | 12.26            | 75.40          | 321.64            | 33.81           | 35.09           | 105.98           | 319.97         | 337.06          |
| 21               | 1271.88               | 1.44             | 51.55         | 11.36           | 15.19            | 89.99          | 323.02            | 28.86           | 32.75           | 121.19           | 320.43         | 342.58          |
| 24               | 1221.72               | 1.10             | 35.89         | 10.01           | 13.88            | 66.56          | 310.13            | 23.15           | 31.31           | 93.75            | 308.10         | 322.04          |
| 27               | 1096.50               | 1.13             | 13.24         | 2.54            | 11.15            | 29.83          | 255.63            | 20.76           | 30.86           | 76.12            | 249.27         | 260.63          |
| 30               | 1047.79               | 0.63             | 8.52          | 2.33            | 9.05             | 17.25          | 273.37            | 20.75           | 26.20           | 84.81            | 262.89         | 276.23          |
| 33               | 714.72                | 0.81             | 8.54          | 2.98            | 7.83             | 18.81          | 181.63            | 15.67           | 22.66           | 67.67            | 172.24         | 185.06          |
| 36               | 562.49                | 0.52             | 7.44          | 1.97            | 6.30             | 22.20          | 129.41            | 9.39            | 19.68           | 44.64            | 125.79         | 133.47          |
| 39               | 412.90                | 0.37             | 13.38         | 2.08            | 5.35             | 19.05          | 89.55             | 6.53            | 17.21           | 31.53            | 89.10          | 94.51           |
| 42               | 467.38                | 0.32             | 9.25          | 1.82            | 5.55             | 26.94          | 104.92            | 5.61            | 14.07           | 37.61            | 103.29         | 109.92          |
| 45               | 468.65                | 0.89             | 13.44         | 2.82            | 6.84             | 34.21          | 108.77            | 7.86            | 16.81           | 46.90            | 106.69         | 116.54          |
| 48               | 420.94                | 0.30             | 6.48          | 4.39            | 5.81             | 29.51          | 95.51             | 7.82            | 11.19           | 42.85            | 91.86          | 101.36          |
| 52               | 306.96                | 0.21             | 9.07          | 2.71            | 4.44             | 17.41          | 69.01             | 5.60            | 8.64            | 28.45            | 66.87          | 72.67           |
| 56               | 166.63                | 0.41             | 6.28          | 5.22            | 5.76             | 22.16          | 59.88             | 6.80            | 12.61           | 37.58            | 54.50          | 66.20           |
| 60               | 180.74                | 0.10             | 2.13          | 1.37            | 1.78             | 3.71           | 38.91             | 3.77            | 8.47            | 15.71            | 37.10          | 40.29           |
| 64               | 63.42                 | 0.37             | 2.56          | 3.46            | 4.88             | 16.57          | 41.69             | 4.62            | 12.24           | 28.78            | 37.39          | 47.18           |
| 68               | 50.61                 | 0.16             | 1.54          | 1.43            | 4.74             | 8.16           | 25.21             | 2.49            | 20.41           | 27.51            | 19.88          | 33.94           |

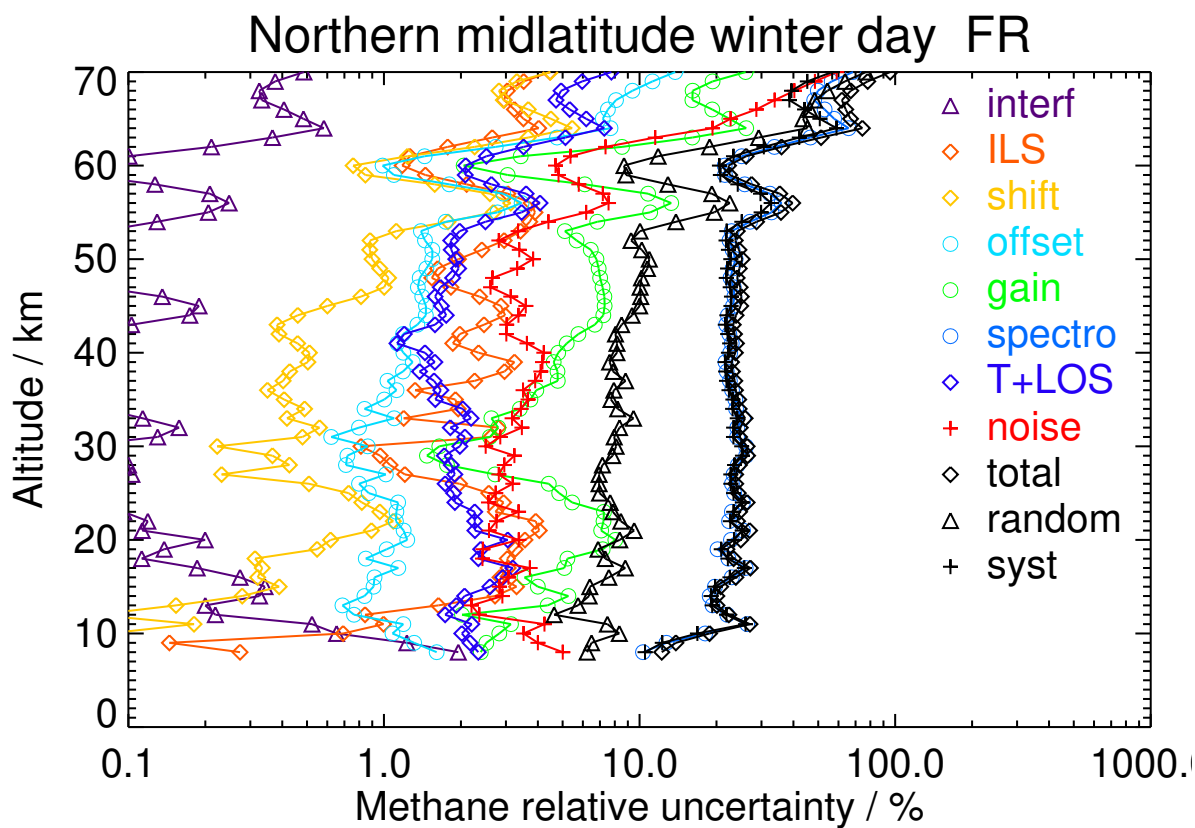

**Figure S9.** V8H\_CH4\_61 Northern midlatitude winter day



**Table S10.** Methane error budget for Northern midlatitude winter night. All uncertainties are  $1\sigma$ .

| altitude<br>(km) | mean target<br>(ppbv) | interf<br>(ppbv) | ILS<br>(ppbv) | shift<br>(ppbv) | offset<br>(ppbv) | gain<br>(ppbv) | spectro<br>(ppbv) | T+LOS<br>(ppbv) | noise<br>(ppbv) | random<br>(ppbv) | syst<br>(ppbv) | total<br>(ppbv) |
|------------------|-----------------------|------------------|---------------|-----------------|------------------|----------------|-------------------|-----------------|-----------------|------------------|----------------|-----------------|
| 9                | 1730.58               | 24.88            | 5.98          | 1.20            | 24.28            | 43.56          | 280.60            | 38.29           | 78.84           | 148.32           | 259.93         | 299.27          |
| 12               | 1627.43               | 4.83             | 19.80         | 1.47            | 12.74            | 48.31          | 369.70            | 28.34           | 43.70           | 87.03            | 367.06         | 377.23          |
| 15               | 1526.07               | 5.38             | 48.81         | 6.06            | 13.94            | 68.84          | 304.39            | 36.47           | 45.04           | 117.99           | 299.12         | 321.55          |
| 18               | 1353.90               | 2.06             | 38.77         | 4.17            | 12.45            | 58.91          | 343.76            | 40.45           | 40.39           | 104.17           | 340.20         | 355.79          |
| 21               | 1240.75               | 2.28             | 35.62         | 6.28            | 11.21            | 60.71          | 318.76            | 30.05           | 36.47           | 96.45            | 315.69         | 330.10          |
| 24               | 1245.79               | 0.97             | 37.35         | 8.37            | 12.64            | 76.15          | 311.87            | 24.01           | 33.29           | 98.11            | 311.04         | 326.15          |
| 27               | 1217.75               | 0.98             | 23.04         | 2.09            | 10.18            | 48.34          | 279.00            | 18.61           | 31.20           | 68.34            | 278.33         | 286.60          |
| 30               | 1143.65               | 0.92             | 9.95          | 2.32            | 8.50             | 19.46          | 286.74            | 19.16           | 29.09           | 56.76            | 284.19         | 289.80          |
| 33               | 884.79                | 1.01             | 14.26         | 4.03            | 7.62             | 22.16          | 205.10            | 15.18           | 24.85           | 53.89            | 201.94         | 209.01          |
| 36               | 586.14                | 0.45             | 9.68          | 1.59            | 6.10             | 19.43          | 137.80            | 9.43            | 20.19           | 42.67            | 134.81         | 141.40          |
| 39               | 425.44                | 0.37             | 12.53         | 2.29            | 5.14             | 17.54          | 97.88             | 6.07            | 16.88           | 36.70            | 95.15          | 101.98          |
| 42               | 410.38                | 0.37             | 8.32          | 1.98            | 5.37             | 25.62          | 101.53            | 5.02            | 14.76           | 35.17            | 100.37         | 106.35          |
| 45               | 407.78                | 0.74             | 13.45         | 1.86            | 4.85             | 22.68          | 95.12             | 6.61            | 16.38           | 29.46            | 95.99          | 100.41          |
| 48               | 350.48                | 0.22             | 4.71          | 2.70            | 3.83             | 18.44          | 80.45             | 5.16            | 9.05            | 28.01            | 78.61          | 83.45           |
| 52               | 271.80                | 0.18             | 7.85          | 1.46            | 3.61             | 14.74          | 64.08             | 4.19            | 7.79            | 23.27            | 62.75          | 66.92           |
| 56               | 214.73                | 0.41             | 4.55          | 4.24            | 5.21             | 17.01          | 58.00             | 5.60            | 13.00           | 26.54            | 56.70          | 62.61           |
| 60               | 186.25                | 0.15             | 2.20          | 1.27            | 2.36             | 4.05           | 44.80             | 4.20            | 10.38           | 15.19            | 43.93          | 46.49           |
| 64               | 128.98                | 0.25             | 2.37          | 2.07            | 3.27             | 8.16           | 38.61             | 4.02            | 11.82           | 17.76            | 37.66          | 41.64           |
| 68               | 82.27                 | 0.15             | 1.74          | 1.58            | 5.18             | 6.41           | 27.93             | 3.30            | 23.04           | 27.89            | 24.85          | 37.36           |

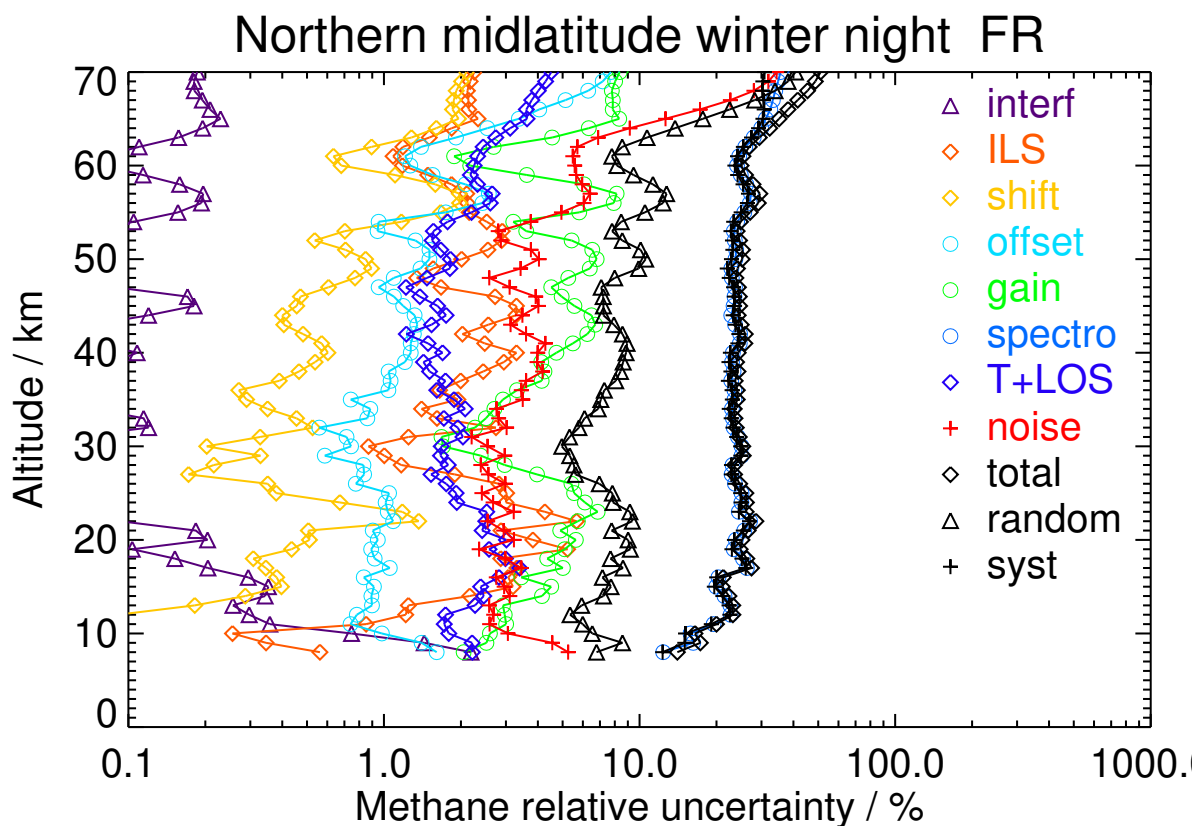

**Figure S10.** V8H\_CH4\_61 Northern midlatitude winter night

**Table S11.** Methane error budget for Northern midlatitude spring day. All uncertainties are  $1\sigma$ .

| altitude<br>(km) | mean target<br>(ppbv) | interf<br>(ppbv) | ILS<br>(ppbv) | shift<br>(ppbv) | offset<br>(ppbv) | gain<br>(ppbv) | spectro<br>(ppbv) | T+LOS<br>(ppbv) | noise<br>(ppbv) | random<br>(ppbv) | syst<br>(ppbv) | total<br>(ppbv) |
|------------------|-----------------------|------------------|---------------|-----------------|------------------|----------------|-------------------|-----------------|-----------------|------------------|----------------|-----------------|
| 9                | 1441.39               | 12.80            | 17.28         | 2.31            | 29.00            | 122.43         | 412.24            | 50.10           | 96.57           | 137.53           | 423.28         | 445.06          |
| 12               | 1746.35               | 4.05             | 26.69         | 1.35            | 12.55            | 97.81          | 333.35            | 34.28           | 39.07           | 80.53            | 343.21         | 352.53          |
| 15               | 1572.31               | 4.23             | 42.12         | 3.24            | 13.12            | 55.65          | 351.20            | 47.24           | 46.80           | 105.71           | 348.80         | 364.47          |
| 18               | 1573.78               | 2.40             | 101.25        | 6.28            | 18.83            | 145.42         | 298.94            | 54.37           | 38.61           | 137.09           | 326.83         | 354.41          |
| 21               | 1209.87               | 2.10             | 46.76         | 12.82           | 16.18            | 97.86          | 267.54            | 31.54           | 35.83           | 125.70           | 265.05         | 293.35          |
| 24               | 1152.54               | 1.20             | 30.56         | 7.33            | 10.71            | 52.76          | 272.12            | 24.28           | 34.43           | 99.91            | 264.06         | 282.33          |
| 27               | 1030.76               | 1.12             | 15.55         | 5.45            | 8.04             | 17.37          | 248.32            | 20.27           | 32.69           | 70.61            | 242.48         | 252.55          |
| 30               | 907.29                | 1.44             | 31.81         | 3.47            | 6.51             | 21.01          | 226.52            | 19.57           | 29.55           | 60.98            | 224.41         | 232.55          |
| 33               | 814.31                | 0.89             | 19.28         | 4.88            | 6.10             | 22.90          | 174.33            | 14.80           | 25.06           | 46.35            | 173.34         | 179.43          |
| 36               | 695.15                | 0.67             | 6.98          | 3.27            | 5.35             | 21.42          | 143.72            | 10.05           | 21.61           | 44.84            | 140.57         | 147.55          |
| 39               | 568.41                | 0.63             | 10.30         | 4.72            | 5.08             | 15.72          | 122.49            | 8.02            | 19.77           | 42.39            | 118.59         | 125.94          |
| 42               | 476.90                | 0.36             | 16.72         | 2.65            | 5.09             | 25.19          | 107.59            | 6.07            | 13.51           | 40.28            | 105.44         | 112.88          |
| 45               | 432.53                | 0.77             | 19.14         | 2.07            | 6.42             | 36.80          | 120.94            | 6.77            | 16.65           | 46.09            | 120.80         | 129.29          |
| 48               | 391.98                | 0.43             | 13.73         | 5.21            | 6.82             | 43.08          | 100.28            | 9.37            | 15.91           | 54.48            | 97.71          | 111.87          |
| 52               | 229.98                | 0.19             | 6.60          | 2.45            | 3.18             | 13.68          | 53.10             | 4.13            | 8.67            | 28.28            | 48.57          | 56.21           |
| 56               | 176.19                | 0.30             | 7.44          | 3.39            | 3.36             | 14.41          | 39.15             | 4.13            | 10.90           | 27.74            | 34.42          | 44.21           |
| 60               | 105.45                | 0.17             | 2.86          | 3.43            | 2.76             | 9.49           | 34.85             | 3.54            | 7.49            | 16.61            | 33.54          | 37.43           |
| 64               | 37.72                 | 0.31             | 1.94          | 4.54            | 4.48             | 18.26          | 30.65             | 3.95            | 8.12            | 18.20            | 32.68          | 37.41           |
| 68               | 46.81                 | 0.13             | 0.90          | 0.94            | 2.45             | 4.83           | 14.33             | 1.33            | 10.04           | 13.28            | 12.75          | 18.41           |

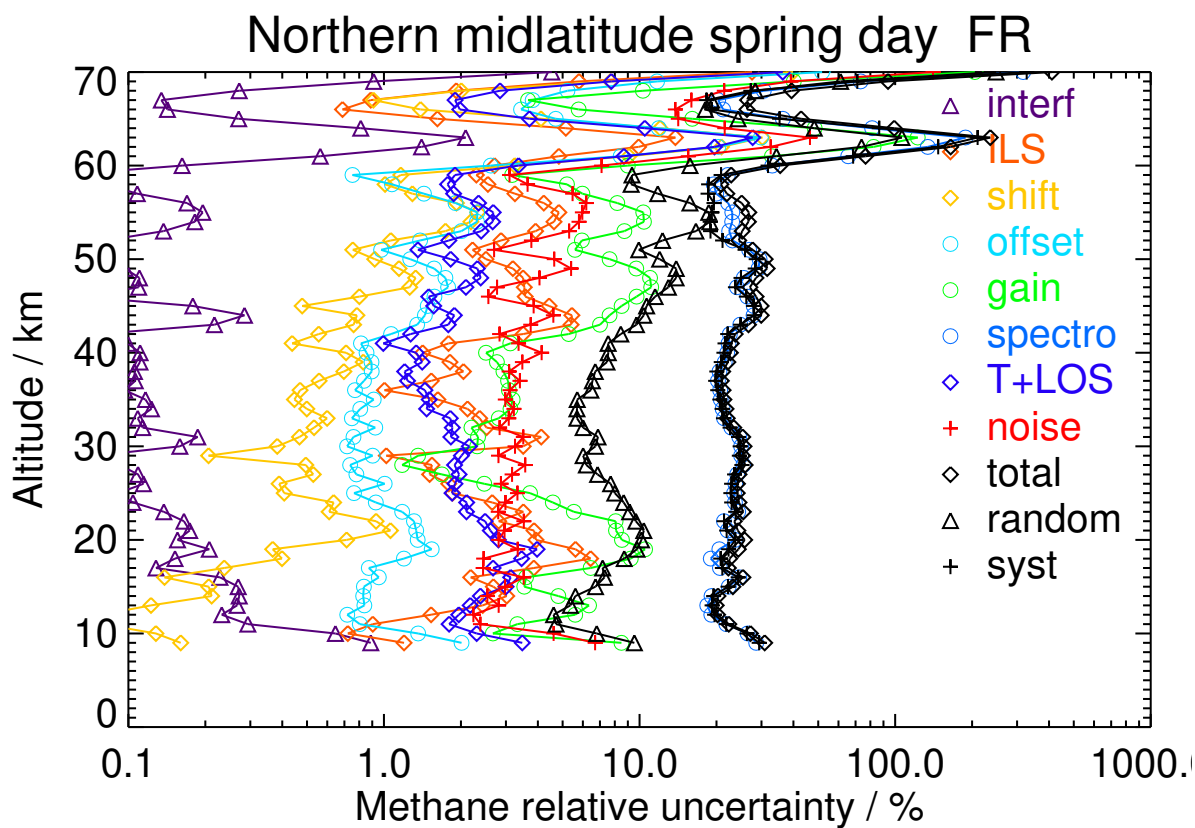

**Figure S11.** V8H\_CH4\_61 Northern midlatitude spring day

**Table S12.** Methane error budget for Northern midlatitude spring night. All uncertainties are  $1\sigma$ .

| altitude<br>(km) | mean target<br>(ppbv) | interf<br>(ppbv) | ILS<br>(ppbv) | shift<br>(ppbv) | offset<br>(ppbv) | gain<br>(ppbv) | spectro<br>(ppbv) | T+LOS<br>(ppbv) | noise<br>(ppbv) | random<br>(ppbv) | syst<br>(ppbv) | total<br>(ppbv) |
|------------------|-----------------------|------------------|---------------|-----------------|------------------|----------------|-------------------|-----------------|-----------------|------------------|----------------|-----------------|
| 9                | 1570.98               | 13.29            | 12.27         | 3.39            | 27.30            | 67.74          | 513.48            | 50.86           | 94.51           | 112.08           | 517.96         | 529.95          |
| 12               | 1733.52               | 2.92             | 21.91         | 1.38            | 11.06            | 96.51          | 303.38            | 31.76           | 33.33           | 71.94            | 314.50         | 322.62          |
| 15               | 1593.12               | 4.71             | 51.58         | 3.21            | 13.13            | 76.47          | 321.17            | 45.69           | 44.59           | 108.96           | 322.59         | 340.50          |
| 18               | 1418.07               | 1.89             | 54.51         | 6.29            | 12.71            | 96.39          | 273.21            | 34.43           | 32.45           | 115.13           | 275.85         | 298.91          |
| 21               | 1143.28               | 2.08             | 60.34         | 13.77           | 14.70            | 87.02          | 280.97            | 28.21           | 32.73           | 137.15           | 271.34         | 304.03          |
| 24               | 1174.03               | 1.40             | 26.36         | 4.23            | 9.63             | 37.14          | 276.59            | 21.34           | 30.91           | 79.96            | 271.49         | 283.02          |
| 27               | 1119.91               | 1.30             | 14.44         | 7.45            | 8.08             | 16.44          | 271.92            | 20.71           | 29.96           | 51.65            | 270.55         | 275.44          |
| 30               | 1011.64               | 1.17             | 27.22         | 4.02            | 6.10             | 19.31          | 237.98            | 19.41           | 25.54           | 48.80            | 237.59         | 242.55          |
| 33               | 878.93                | 0.82             | 14.61         | 4.74            | 6.01             | 19.88          | 191.74            | 15.45           | 22.92           | 51.03            | 188.66         | 195.44          |
| 36               | 721.38                | 0.47             | 6.77          | 3.17            | 5.64             | 23.82          | 147.72            | 10.08           | 20.24           | 39.29            | 146.44         | 151.62          |
| 39               | 577.78                | 0.58             | 15.61         | 4.69            | 4.85             | 16.37          | 126.35            | 8.14            | 18.28           | 33.87            | 125.60         | 130.09          |
| 42               | 473.26                | 0.25             | 14.14         | 2.99            | 5.04             | 26.05          | 108.53            | 5.22            | 12.63           | 32.78            | 108.65         | 113.48          |
| 45               | 397.15                | 1.03             | 17.94         | 2.50            | 5.44             | 27.06          | 96.84             | 6.42            | 17.69           | 34.37            | 98.20          | 104.04          |
| 48               | 337.88                | 0.37             | 4.91          | 5.18            | 4.54             | 26.95          | 72.86             | 6.65            | 13.01           | 29.01            | 74.02          | 79.50           |
| 52               | 236.37                | 0.14             | 6.52          | 1.64            | 2.67             | 11.05          | 54.06             | 3.33            | 6.89            | 19.92            | 52.53          | 56.18           |
| 56               | 190.88                | 0.45             | 6.59          | 5.02            | 4.40             | 17.47          | 49.96             | 5.02            | 11.25           | 31.23            | 45.44          | 55.14           |
| 60               | 139.59                | 0.14             | 2.43          | 2.59            | 1.87             | 5.68           | 39.58             | 3.07            | 5.99            | 16.67            | 37.18          | 40.75           |
| 64               | 66.04                 | 0.33             | 1.61          | 4.23            | 4.44             | 17.57          | 35.12             | 4.28            | 8.65            | 18.77            | 36.37          | 40.93           |
| 68               | 47.29                 | 0.12             | 1.20          | 0.84            | 2.87             | 4.43           | 16.66             | 1.73            | 12.07           | 15.66            | 14.52          | 21.36           |

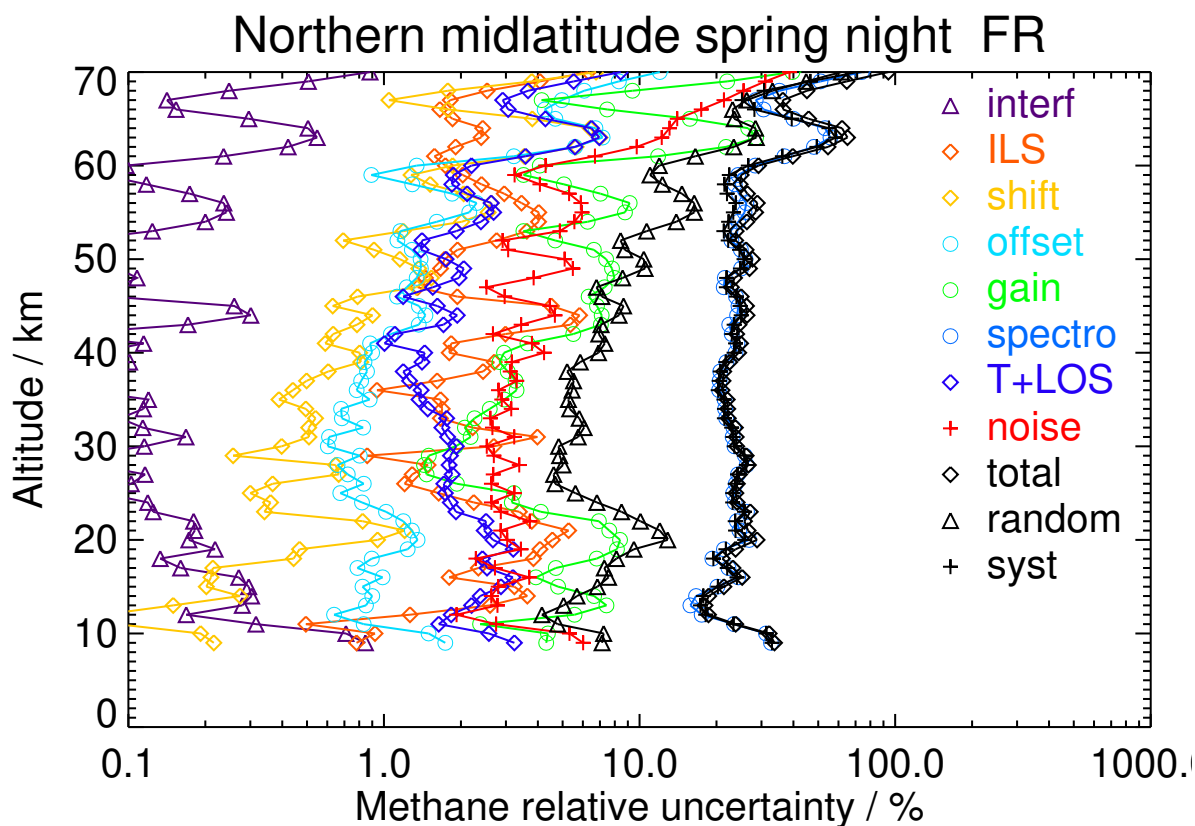

**Figure S12.** V8H\_CH4\_61 Northern midlatitude spring night

**Table S13.** Methane error budget for Northern midlatitude summer day. All uncertainties are  $1\sigma$ .

| altitude<br>(km) | mean target<br>(ppbv) | interf<br>(ppbv) | ILS<br>(ppbv) | shift<br>(ppbv) | offset<br>(ppbv) | gain<br>(ppbv) | spectro<br>(ppbv) | T+LOS<br>(ppbv) | noise<br>(ppbv) | random<br>(ppbv) | syst<br>(ppbv) | total<br>(ppbv) |
|------------------|-----------------------|------------------|---------------|-----------------|------------------|----------------|-------------------|-----------------|-----------------|------------------|----------------|-----------------|
| 12               | 1776.59               | 5.40             | 32.29         | 1.32            | 14.33            | 72.36          | 404.96            | 34.81           | 43.00           | 86.04            | 407.63         | 416.61          |
| 15               | 1876.20               | 6.40             | 110.95        | 4.59            | 19.42            | 112.24         | 367.34            | 54.36           | 53.34           | 118.87           | 389.82         | 407.54          |
| 18               | 1674.14               | 2.65             | 30.33         | 3.88            | 13.68            | 75.04          | 368.81            | 38.43           | 41.45           | 93.92            | 370.35         | 382.07          |
| 21               | 1245.16               | 2.13             | 72.09         | 8.53            | 13.07            | 29.05          | 328.18            | 32.46           | 36.41           | 72.76            | 333.28         | 341.13          |
| 24               | 1140.89               | 1.55             | 39.35         | 4.07            | 11.12            | 20.42          | 285.05            | 23.43           | 32.00           | 51.93            | 286.77         | 291.44          |
| 27               | 1076.55               | 1.42             | 5.78          | 6.17            | 9.57             | 12.13          | 241.87            | 20.99           | 30.11           | 45.07            | 241.10         | 245.27          |
| 30               | 1022.50               | 0.65             | 11.89         | 2.83            | 7.56             | 16.96          | 251.93            | 19.28           | 25.03           | 42.90            | 251.24         | 254.87          |
| 33               | 794.28                | 0.94             | 10.02         | 4.34            | 6.61             | 15.17          | 183.47            | 14.61           | 21.28           | 38.18            | 182.39         | 186.34          |
| 36               | 688.28                | 0.70             | 7.76          | 2.39            | 5.43             | 14.23          | 149.48            | 10.05           | 19.17           | 32.32            | 148.55         | 152.03          |
| 39               | 554.88                | 0.72             | 17.22         | 3.08            | 4.50             | 12.89          | 112.35            | 6.97            | 16.15           | 27.41            | 112.58         | 115.87          |
| 42               | 435.59                | 0.31             | 14.51         | 2.79            | 4.36             | 23.38          | 111.15            | 4.35            | 14.27           | 37.70            | 109.27         | 115.59          |
| 45               | 358.98                | 1.05             | 23.50         | 3.01            | 6.29             | 36.44          | 109.94            | 7.80            | 21.22           | 46.74            | 111.10         | 120.53          |
| 48               | 268.83                | 0.36             | 5.02          | 3.21            | 4.36             | 27.67          | 63.35             | 4.90            | 11.30           | 41.07            | 57.43          | 70.60           |
| 52               | 211.88                | 0.18             | 3.60          | 1.34            | 2.77             | 13.36          | 56.36             | 2.64            | 5.79            | 28.20            | 51.21          | 58.46           |
| 56               | 171.72                | 0.39             | 5.08          | 3.47            | 3.09             | 12.18          | 49.80             | 4.07            | 11.45           | 26.14            | 46.27          | 53.14           |
| 60               | 192.79                | 0.12             | 3.46          | 2.67            | 1.29             | 3.80           | 46.84             | 2.97            | 5.64            | 18.44            | 43.93          | 47.64           |
| 64               | 162.22                | 0.26             | 1.08          | 2.81            | 3.57             | 12.62          | 51.77             | 2.99            | 9.74            | 18.60            | 51.18          | 54.45           |
| 68               | 169.18                | 0.16             | 1.81          | 1.73            | 3.66             | 4.96           | 44.49             | 2.99            | 16.49           | 21.54            | 42.90          | 48.01           |

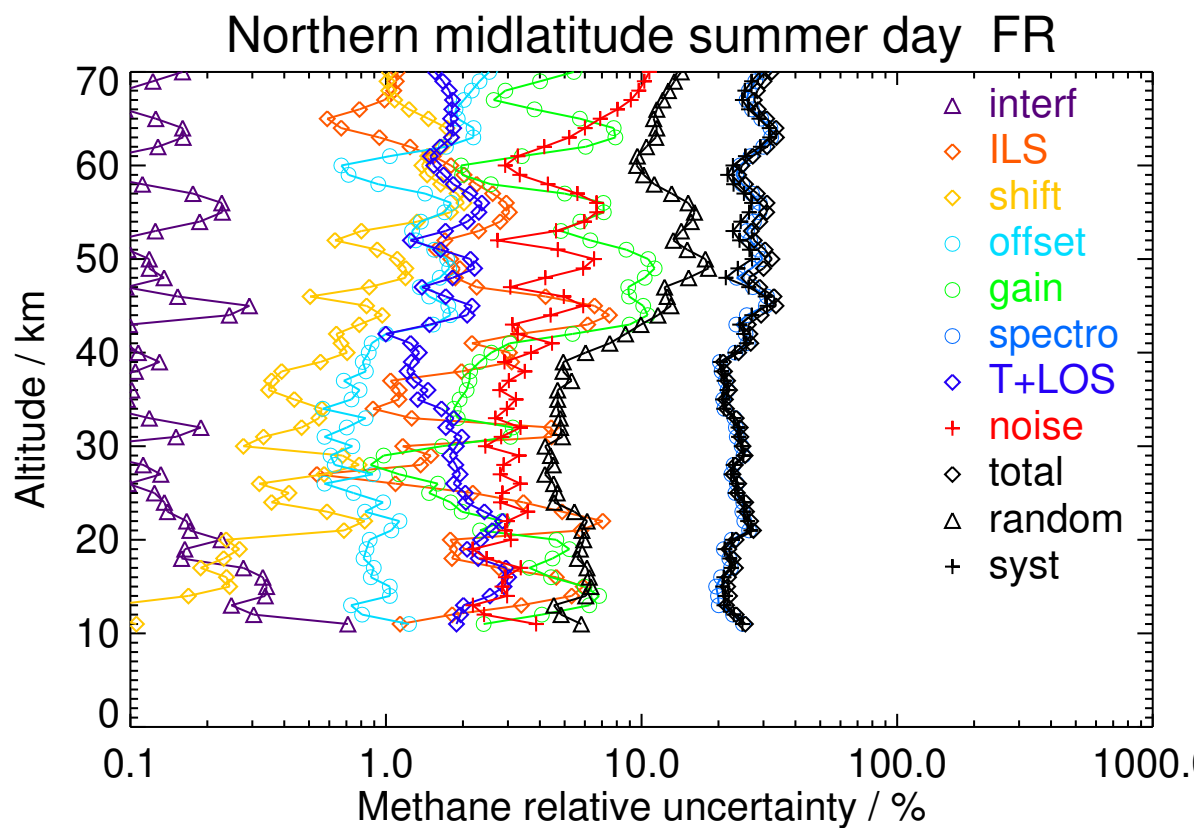

**Figure S13.** V8H\_CH4\_61 Northern midlatitude summer day

**Table S14.** Methane error budget for Northern midlatitude summer night. All uncertainties are  $1\sigma$ .

| altitude<br>(km) | mean target<br>(ppbv) | interf<br>(ppbv) | ILS<br>(ppbv) | shift<br>(ppbv) | offset<br>(ppbv) | gain<br>(ppbv) | spectro<br>(ppbv) | T+LOS<br>(ppbv) | noise<br>(ppbv) | random<br>(ppbv) | syst<br>(ppbv) | total<br>(ppbv) |
|------------------|-----------------------|------------------|---------------|-----------------|------------------|----------------|-------------------|-----------------|-----------------|------------------|----------------|-----------------|
| 12               | 1791.40               | 7.53             | 20.34         | 1.09            | 16.51            | 46.52          | 421.02            | 34.65           | 51.11           | 86.10            | 420.20         | 428.93          |
| 15               | 1890.44               | 6.78             | 87.67         | 2.93            | 17.20            | 112.69         | 298.34            | 48.71           | 51.16           | 111.83           | 319.72         | 338.72          |
| 18               | 1599.47               | 3.32             | 32.69         | 3.08            | 12.63            | 55.32          | 348.62            | 40.40           | 43.53           | 92.44            | 347.60         | 359.68          |
| 21               | 1227.12               | 2.53             | 53.22         | 4.16            | 10.40            | 19.11          | 314.80            | 28.87           | 36.34           | 60.66            | 317.65         | 323.39          |
| 24               | 1096.50               | 1.62             | 36.78         | 1.78            | 9.47             | 17.55          | 273.06            | 21.92           | 32.49           | 47.03            | 275.03         | 279.02          |
| 27               | 1102.36               | 1.49             | 5.84          | 3.83            | 8.41             | 11.31          | 247.73            | 19.17           | 30.32           | 42.59            | 247.17         | 250.81          |
| 30               | 954.35                | 0.65             | 5.78          | 2.00            | 7.22             | 14.34          | 250.07            | 17.11           | 26.46           | 42.76            | 248.99         | 252.64          |
| 33               | 824.06                | 1.07             | 13.74         | 4.53            | 6.60             | 16.77          | 193.32            | 13.50           | 22.20           | 35.53            | 193.18         | 196.42          |
| 36               | 674.28                | 0.84             | 6.00          | 1.53            | 5.39             | 10.73          | 152.99            | 9.59            | 20.20           | 30.63            | 152.15         | 155.20          |
| 39               | 538.38                | 0.37             | 15.80         | 2.73            | 4.48             | 12.71          | 117.18            | 6.51            | 17.89           | 26.60            | 117.58         | 120.55          |
| 42               | 417.87                | 0.46             | 7.73          | 2.41            | 3.46             | 13.63          | 104.34            | 4.05            | 17.11           | 30.93            | 102.48         | 107.05          |
| 45               | 372.21                | 1.03             | 18.18         | 2.77            | 5.62             | 34.23          | 90.39             | 8.17            | 19.92           | 39.58            | 92.79          | 100.88          |
| 48               | 298.70                | 0.21             | 4.25          | 3.55            | 3.00             | 20.27          | 72.68             | 3.93            | 7.92            | 39.66            | 65.10          | 76.23           |
| 52               | 225.56                | 0.13             | 4.70          | 1.01            | 2.45             | 10.95          | 56.71             | 2.75            | 6.56            | 23.06            | 53.71          | 58.45           |
| 56               | 189.71                | 0.32             | 5.34          | 3.83            | 2.97             | 11.51          | 48.92             | 4.22            | 11.06           | 22.87            | 46.85          | 52.14           |
| 60               | 200.96                | 0.14             | 2.29          | 2.69            | 1.56             | 3.81           | 49.23             | 3.68            | 7.31            | 17.21            | 47.16          | 50.20           |
| 64               | 186.49                | 0.29             | 1.67          | 2.39            | 3.43             | 11.10          | 57.31             | 3.54            | 9.67            | 16.32            | 57.16          | 59.44           |
| 68               | 182.52                | 0.18             | 3.10          | 1.64            | 4.59             | 6.26           | 52.17             | 4.77            | 20.43           | 24.88            | 51.14          | 56.87           |

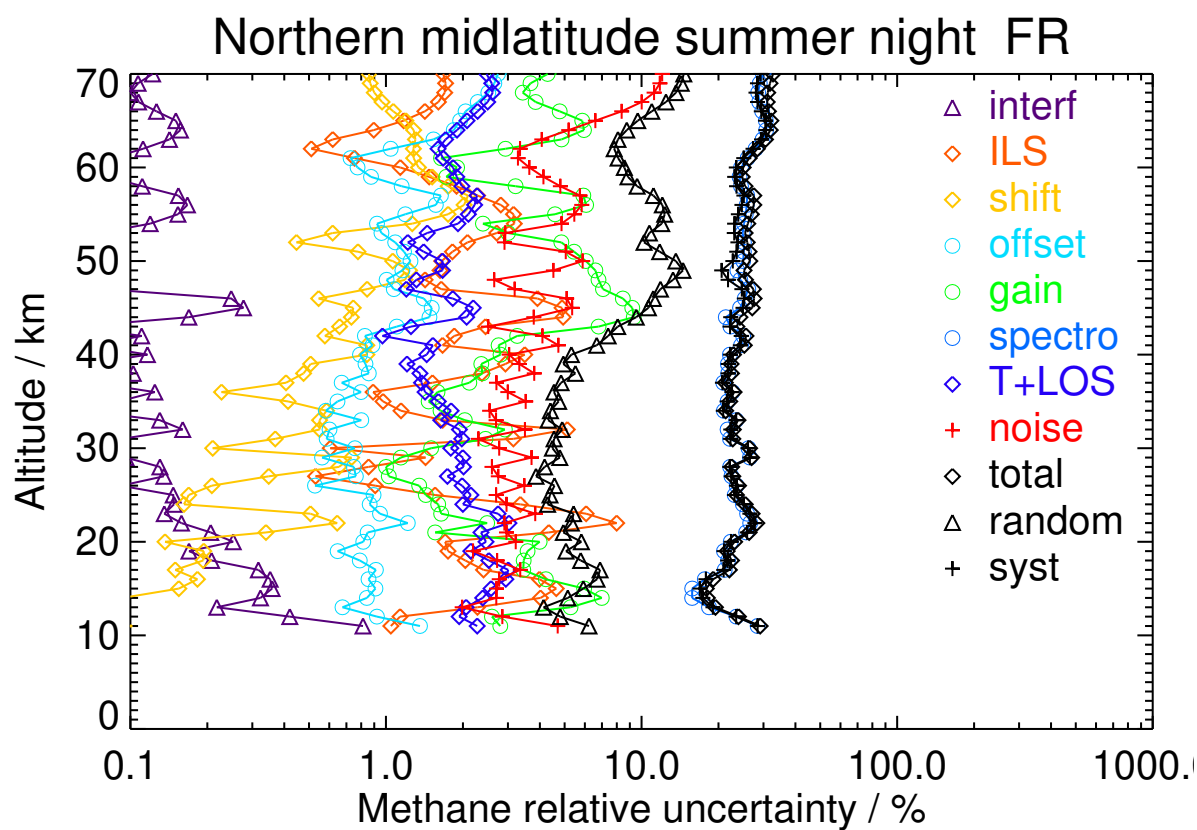

**Figure S14.** V8H\_CH4\_61 Northern midlatitude summer night

**Table S15.** Methane error budget for Northern midlatitude autumn day. All uncertainties are  $1\sigma$ .

| altitude<br>(km) | mean target<br>(ppbv) | interf<br>(ppbv) | ILS<br>(ppbv) | shift<br>(ppbv) | offset<br>(ppbv) | gain<br>(ppbv) | spectro<br>(ppbv) | T+LOS<br>(ppbv) | noise<br>(ppbv) | random<br>(ppbv) | syst<br>(ppbv) | total<br>(ppbv) |
|------------------|-----------------------|------------------|---------------|-----------------|------------------|----------------|-------------------|-----------------|-----------------|------------------|----------------|-----------------|
| 12               | 1821.12               | 8.29             | 38.44         | 1.50            | 21.32            | 50.56          | 428.91            | 37.92           | 62.07           | 103.30           | 427.96         | 440.25          |
| 15               | 1906.00               | 5.80             | 76.63         | 3.26            | 17.91            | 102.87         | 362.28            | 48.39           | 56.62           | 122.77           | 372.21         | 391.93          |
| 18               | 1599.35               | 3.43             | 106.27        | 3.69            | 16.23            | 101.20         | 332.26            | 59.30           | 47.06           | 172.04           | 329.17         | 371.41          |
| 21               | 1257.58               | 2.51             | 64.07         | 4.37            | 13.69            | 61.35          | 307.78            | 37.17           | 43.29           | 123.40           | 301.39         | 325.68          |
| 24               | 1099.64               | 1.20             | 54.78         | 4.52            | 9.25             | 26.76          | 274.79            | 23.73           | 37.87           | 67.25            | 277.15         | 285.19          |
| 27               | 1031.16               | 1.15             | 21.47         | 2.37            | 8.20             | 13.39          | 246.36            | 17.93           | 32.79           | 52.94            | 244.95         | 250.61          |
| 30               | 988.98                | 1.06             | 14.45         | 2.05            | 7.61             | 16.02          | 251.96            | 16.49           | 29.19           | 56.61            | 248.86         | 255.22          |
| 33               | 870.49                | 0.97             | 18.11         | 4.08            | 6.95             | 20.82          | 201.26            | 12.92           | 23.97           | 51.82            | 198.46         | 205.12          |
| 36               | 733.56                | 0.59             | 4.17          | 2.14            | 5.98             | 18.02          | 159.11            | 9.23            | 21.09           | 37.98            | 157.43         | 161.95          |
| 39               | 661.51                | 0.46             | 11.53         | 4.10            | 5.41             | 18.31          | 129.01            | 7.36            | 19.15           | 35.15            | 127.85         | 132.59          |
| 42               | 553.29                | 0.28             | 6.79          | 3.64            | 4.34             | 16.43          | 123.80            | 5.07            | 16.41           | 33.62            | 121.82         | 126.37          |
| 45               | 512.22                | 0.66             | 13.12         | 1.37            | 6.11             | 33.37          | 122.65            | 7.79            | 14.65           | 37.71            | 123.37         | 129.01          |
| 48               | 460.31                | 0.20             | 4.72          | 6.27            | 6.84             | 37.46          | 110.82            | 9.05            | 10.45           | 39.41            | 111.49         | 118.25          |
| 52               | 417.60                | 0.17             | 10.81         | 2.38            | 5.99             | 27.08          | 91.13             | 5.71            | 9.01            | 28.75            | 92.10          | 96.49           |
| 56               | 273.24                | 0.34             | 9.64          | 4.65            | 4.47             | 12.20          | 84.27             | 5.73            | 11.16           | 22.59            | 83.86          | 86.85           |
| 60               | 267.80                | 0.16             | 2.93          | 2.58            | 2.17             | 3.37           | 59.78             | 5.54            | 9.04            | 13.88            | 59.37          | 60.97           |
| 64               | 153.21                | 0.24             | 1.25          | 2.61            | 4.15             | 12.43          | 52.30             | 4.81            | 9.62            | 16.33            | 52.58          | 55.06           |
| 68               | 114.63                | 0.09             | 1.30          | 1.09            | 4.72             | 6.23           | 34.45             | 3.37            | 20.24           | 23.10            | 33.74          | 40.89           |

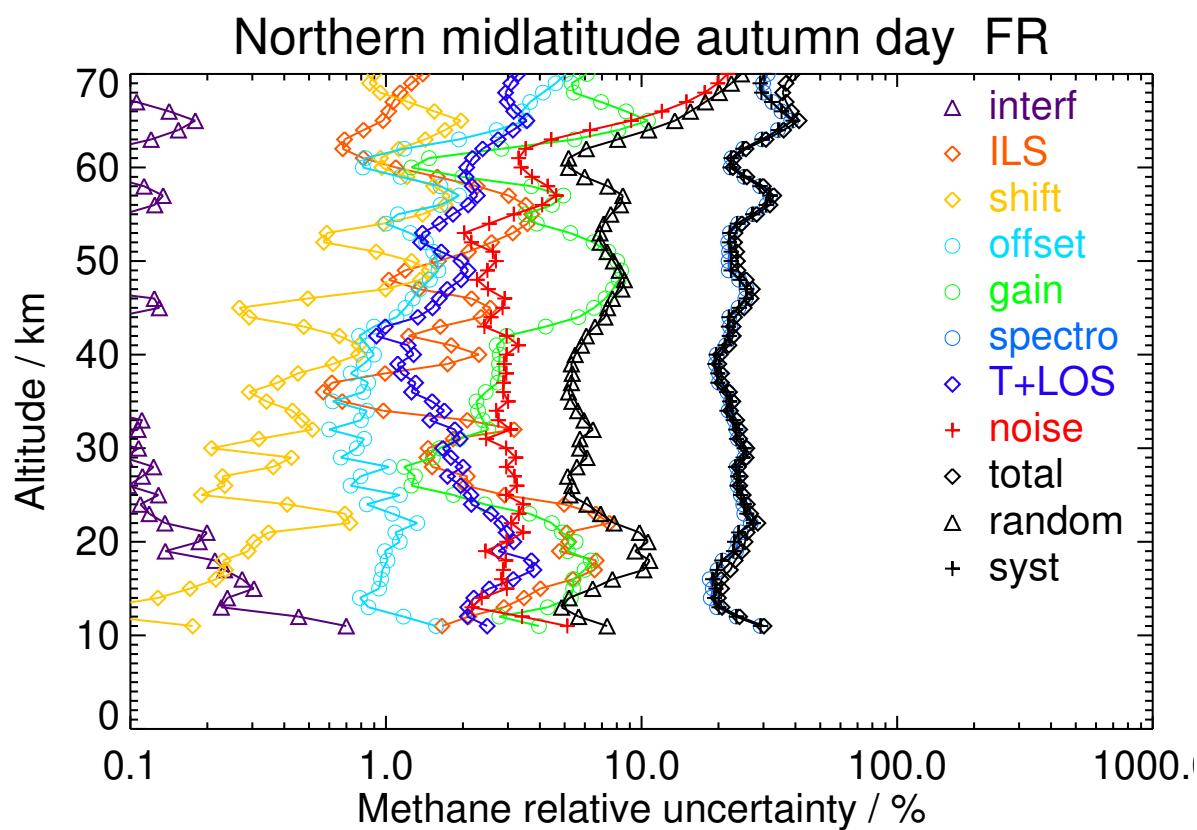

**Figure S15.** V8H\_CH4\_61 Northern midlatitude autumn day

**Table S16.** Methane error budget for Northern midlatitude autumn night. All uncertainties are  $1\sigma$ .

| altitude<br>(km) | mean target<br>(ppbv) | interf<br>(ppbv) | ILS<br>(ppbv) | shift<br>(ppbv) | offset<br>(ppbv) | gain<br>(ppbv) | spectro<br>(ppbv) | T+LOS<br>(ppbv) | noise<br>(ppbv) | random<br>(ppbv) | syst<br>(ppbv) | total<br>(ppbv) |
|------------------|-----------------------|------------------|---------------|-----------------|------------------|----------------|-------------------|-----------------|-----------------|------------------|----------------|-----------------|
| 9                | 1635.24               | 16.60            | 4.51          | 1.01            | 27.81            | 98.55          | 501.80            | 43.60           | 90.15           | 119.36           | 508.30         | 522.12          |
| 12               | 1810.93               | 5.72             | 27.32         | 2.26            | 16.53            | 94.26          | 395.73            | 34.50           | 48.44           | 126.57           | 392.51         | 412.41          |
| 15               | 1795.28               | 4.79             | 49.16         | 3.90            | 14.61            | 98.51          | 342.68            | 46.23           | 52.67           | 118.12           | 347.51         | 367.03          |
| 18               | 1680.03               | 2.66             | 117.99        | 5.80            | 16.95            | 130.45         | 329.15            | 61.03           | 46.50           | 174.43           | 339.22         | 381.44          |
| 21               | 1315.79               | 2.41             | 76.02         | 5.18            | 17.00            | 101.74         | 304.41            | 43.40           | 43.16           | 151.40           | 299.90         | 335.95          |
| 24               | 1176.88               | 1.09             | 61.32         | 8.38            | 11.89            | 60.41          | 282.31            | 27.11           | 38.44           | 93.44            | 284.26         | 299.22          |
| 27               | 1040.27               | 1.02             | 27.68         | 3.83            | 8.56             | 23.72          | 258.09            | 19.60           | 34.68           | 64.14            | 255.93         | 263.84          |
| 30               | 973.08                | 1.27             | 22.67         | 1.91            | 7.31             | 20.91          | 248.40            | 18.69           | 31.05           | 63.10            | 245.04         | 253.03          |
| 33               | 836.20                | 0.79             | 14.34         | 3.65            | 6.21             | 16.85          | 193.11            | 14.14           | 25.35           | 52.82            | 189.43         | 196.66          |
| 36               | 696.31                | 0.53             | 8.63          | 2.64            | 5.44             | 18.61          | 157.86            | 9.71            | 21.46           | 47.42            | 153.90         | 161.04          |
| 39               | 578.97                | 0.51             | 15.42         | 3.56            | 5.37             | 22.63          | 132.91            | 6.98            | 18.91           | 47.58            | 128.83         | 137.34          |
| 42               | 481.50                | 0.28             | 11.60         | 2.87            | 4.63             | 20.96          | 122.06            | 5.61            | 17.19           | 50.48            | 115.25         | 125.82          |
| 45               | 415.57                | 0.59             | 16.26         | 1.57            | 6.23             | 34.62          | 103.71            | 7.87            | 14.57           | 52.06            | 99.11          | 111.95          |
| 48               | 363.60                | 0.24             | 6.37          | 3.66            | 5.19             | 30.48          | 95.11             | 6.36            | 9.26            | 44.56            | 90.54          | 100.91          |
| 52               | 337.59                | 0.21             | 6.47          | 1.81            | 5.17             | 23.94          | 82.23             | 4.89            | 8.53            | 33.01            | 80.08          | 86.62           |
| 56               | 278.91                | 0.37             | 5.98          | 3.80            | 3.79             | 10.68          | 71.82             | 5.04            | 11.19           | 22.90            | 70.45          | 74.08           |
| 60               | 238.27                | 0.21             | 1.89          | 2.27            | 2.66             | 4.92           | 58.43             | 4.75            | 9.66            | 15.00            | 57.84          | 59.75           |
| 64               | 170.37                | 0.24             | 1.49          | 2.29            | 3.53             | 10.78          | 49.52             | 4.46            | 9.48            | 17.69            | 48.84          | 51.95           |
| 68               | 119.25                | 0.12             | 1.86          | 1.27            | 4.97             | 6.81           | 37.28             | 4.03            | 21.17           | 25.28            | 35.94          | 43.94           |

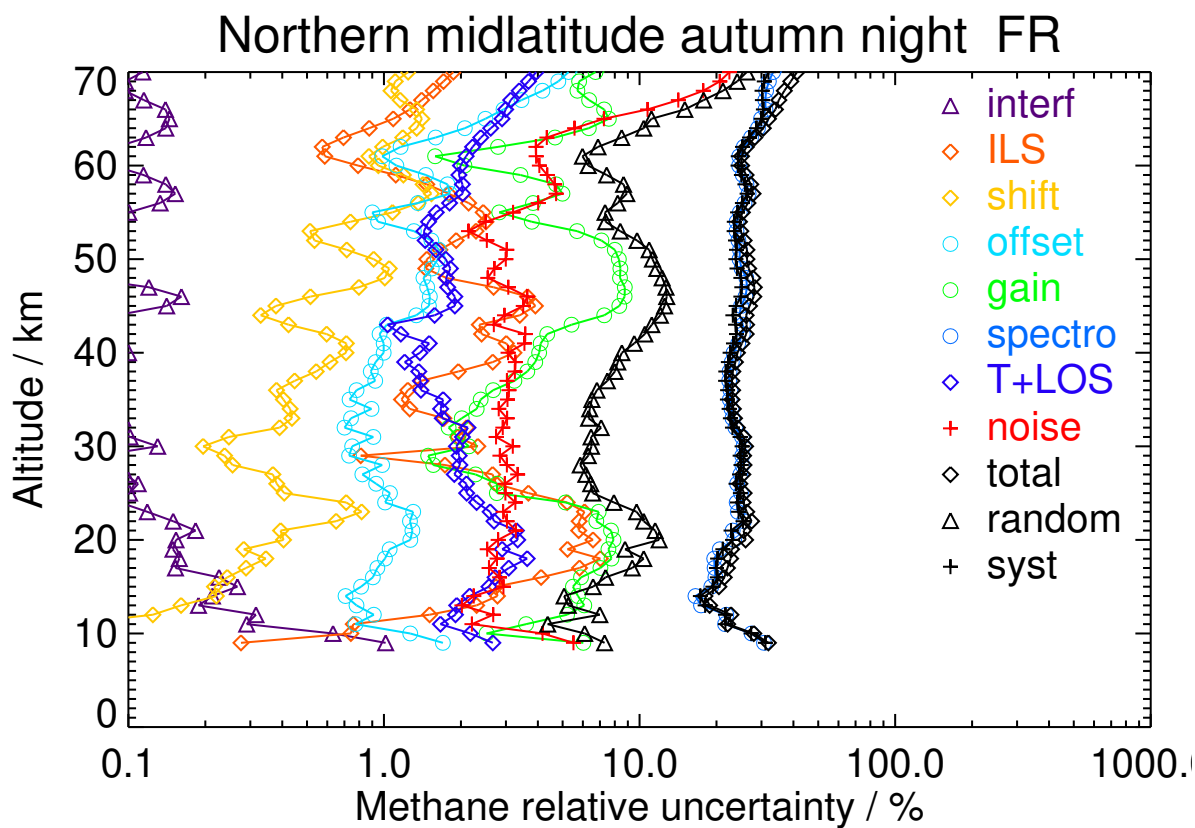

**Figure S16.** V8H\_CH4\_61 Northern midlatitude autumn night



**Table S17.** Methane error budget for Tropics day. All uncertainties are  $1\sigma$ .

| altitude<br>(km) | mean target<br>(ppbv) | interf<br>(ppbv) | ILS<br>(ppbv) | shift<br>(ppbv) | offset<br>(ppbv) | gain<br>(ppbv) | spectro<br>(ppbv) | T+LOS<br>(ppbv) | noise<br>(ppbv) | random<br>(ppbv) | syst<br>(ppbv) | total<br>(ppbv) |
|------------------|-----------------------|------------------|---------------|-----------------|------------------|----------------|-------------------|-----------------|-----------------|------------------|----------------|-----------------|
| 12               | 1904.76               | 4.35             | 50.15         | 8.97            | 12.79            | 96.16          | 356.48            | 38.44           | 47.75           | 100.31           | 364.42         | 377.97          |
| 15               | 1890.71               | 10.30            | 115.31        | 13.27           | 21.87            | 66.73          | 358.81            | 60.05           | 60.95           | 109.09           | 377.72         | 393.16          |
| 18               | 1778.17               | 5.92             | 88.75         | 13.27           | 22.42            | 49.83          | 369.23            | 61.04           | 60.66           | 126.01           | 372.74         | 393.46          |
| 21               | 1620.31               | 2.81             | 31.56         | 5.81            | 19.57            | 24.18          | 379.91            | 42.07           | 48.36           | 81.59            | 379.20         | 387.87          |
| 24               | 1608.92               | 1.36             | 32.41         | 7.01            | 13.25            | 34.05          | 369.66            | 29.82           | 38.96           | 60.99            | 371.17         | 376.15          |
| 27               | 1467.06               | 1.10             | 18.31         | 7.59            | 9.97             | 20.19          | 352.29            | 26.25           | 35.44           | 59.06            | 351.38         | 356.31          |
| 30               | 1476.20               | 1.41             | 39.10         | 3.99            | 7.54             | 40.96          | 362.91            | 25.07           | 30.00           | 59.40            | 364.67         | 369.48          |
| 33               | 1324.19               | 1.54             | 28.02         | 7.17            | 6.95             | 32.28          | 284.82            | 19.92           | 26.88           | 51.64            | 285.49         | 290.12          |
| 36               | 1157.37               | 0.74             | 11.80         | 6.90            | 6.03             | 23.18          | 227.30            | 13.63           | 23.85           | 42.06            | 226.74         | 230.61          |
| 39               | 877.30                | 0.56             | 16.78         | 5.53            | 5.36             | 13.16          | 188.27            | 10.86           | 22.52           | 36.55            | 187.74         | 191.27          |
| 42               | 712.50                | 0.93             | 34.44         | 5.31            | 9.41             | 50.29          | 165.97            | 9.51            | 15.66           | 46.68            | 171.85         | 178.08          |
| 45               | 552.56                | 0.66             | 22.37         | 2.56            | 8.17             | 48.73          | 137.31            | 8.42            | 14.05           | 35.47            | 144.27         | 148.56          |
| 48               | 440.22                | 0.24             | 8.29          | 5.14            | 6.37             | 39.39          | 111.08            | 8.20            | 15.12           | 44.97            | 110.91         | 119.68          |
| 52               | 320.11                | 0.27             | 5.67          | 1.95            | 3.70             | 16.48          | 71.82             | 5.32            | 10.31           | 28.28            | 69.38          | 74.92           |
| 56               | 242.32                | 0.32             | 4.96          | 3.79            | 3.14             | 11.69          | 59.51             | 4.50            | 9.86            | 21.20            | 58.27          | 62.01           |
| 60               | 202.06                | 0.11             | 5.83          | 3.71            | 2.64             | 9.98           | 54.04             | 4.03            | 6.23            | 13.65            | 54.25          | 55.94           |
| 64               | 177.72                | 0.14             | 1.40          | 3.11            | 2.95             | 8.90           | 49.76             | 3.52            | 9.34            | 15.01            | 49.50          | 51.73           |
| 68               | 163.07                | 0.16             | 2.45          | 2.22            | 3.03             | 6.29           | 43.88             | 3.60            | 12.83           | 17.32            | 43.16          | 46.51           |

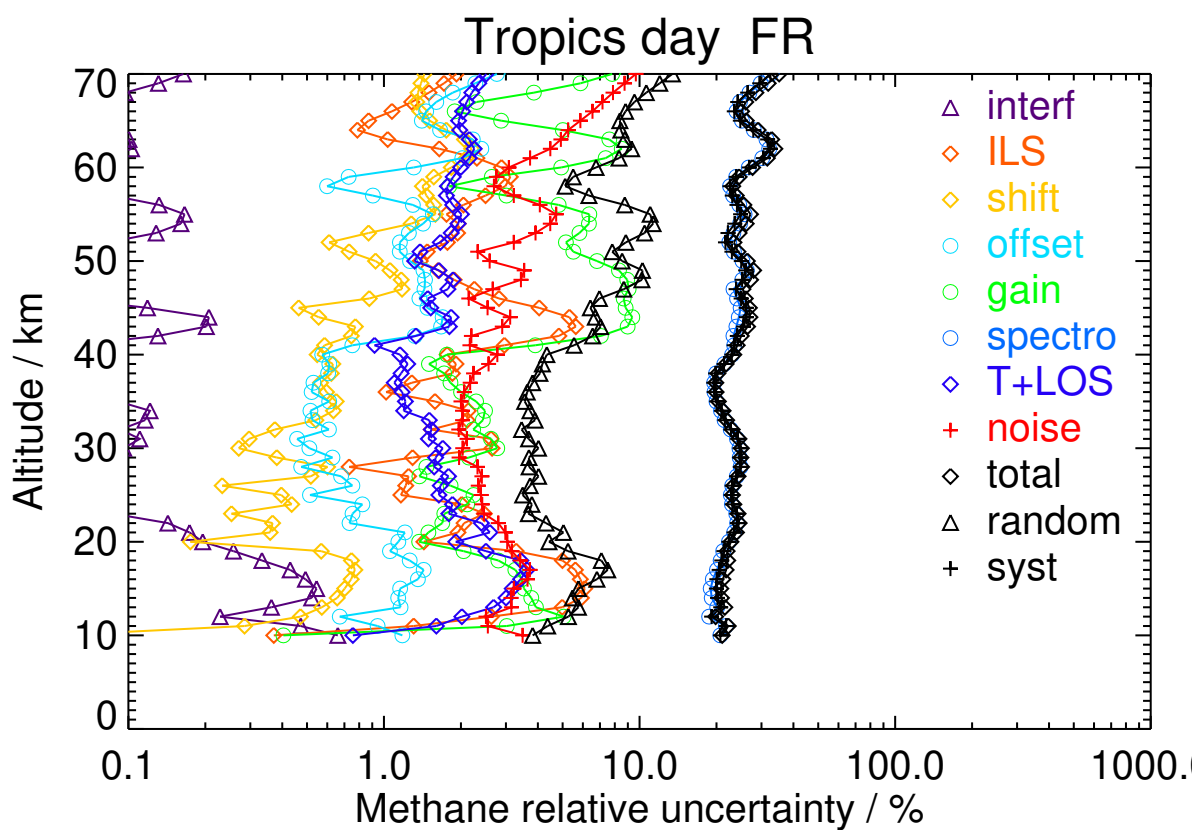

**Figure S17.** V8H\_CH4\_61 Tropics day



**Table S18.** Methane error budget for Tropics night. All uncertainties are  $1\sigma$ .

| altitude<br>(km) | mean target<br>(ppbv) | interf<br>(ppbv) | ILS<br>(ppbv) | shift<br>(ppbv) | offset<br>(ppbv) | gain<br>(ppbv) | spectro<br>(ppbv) | T+LOS<br>(ppbv) | noise<br>(ppbv) | random<br>(ppbv) | syst<br>(ppbv) | total<br>(ppbv) |
|------------------|-----------------------|------------------|---------------|-----------------|------------------|----------------|-------------------|-----------------|-----------------|------------------|----------------|-----------------|
| 12               | 1907.14               | 5.67             | 13.47         | 5.14            | 10.87            | 112.17         | 332.93            | 32.20           | 50.18           | 102.53           | 341.79         | 356.84          |
| 15               | 1858.51               | 9.80             | 73.03         | 16.37           | 19.67            | 61.16          | 359.50            | 50.00           | 56.88           | 122.78           | 360.17         | 380.53          |
| 18               | 1840.00               | 6.38             | 65.59         | 16.94           | 23.51            | 51.36          | 386.78            | 56.51           | 61.45           | 116.79           | 388.26         | 405.45          |
| 21               | 1655.19               | 3.17             | 28.96         | 8.71            | 20.31            | 23.23          | 395.88            | 41.72           | 49.85           | 77.21            | 396.06         | 403.51          |
| 24               | 1638.57               | 1.43             | 16.56         | 6.74            | 13.68            | 33.32          | 375.42            | 30.27           | 39.03           | 58.82            | 376.22         | 380.79          |
| 27               | 1527.71               | 1.06             | 9.85          | 8.88            | 9.92             | 27.25          | 356.06            | 26.71           | 33.98           | 53.60            | 356.08         | 360.09          |
| 30               | 1536.44               | 1.39             | 40.69         | 4.37            | 7.38             | 41.76          | 374.65            | 25.98           | 28.49           | 53.98            | 377.37         | 381.21          |
| 33               | 1363.96               | 1.51             | 18.60         | 8.17            | 6.69             | 29.22          | 286.42            | 19.66           | 26.16           | 44.82            | 287.07         | 290.55          |
| 36               | 1215.49               | 0.70             | 14.13         | 6.45            | 6.54             | 27.60          | 234.74            | 14.02           | 23.26           | 40.37            | 235.07         | 238.51          |
| 39               | 906.40                | 0.57             | 22.31         | 5.04            | 5.67             | 14.42          | 191.11            | 11.47           | 21.64           | 35.25            | 191.42         | 194.64          |
| 42               | 688.11                | 0.40             | 23.97         | 4.56            | 6.65             | 39.52          | 159.37            | 7.35            | 14.21           | 36.82            | 162.79         | 166.90          |
| 45               | 534.21                | 0.87             | 18.31         | 2.79            | 8.19             | 48.53          | 129.16            | 9.19            | 16.61           | 32.09            | 137.04         | 140.75          |
| 48               | 404.92                | 0.31             | 9.31          | 5.08            | 5.46             | 34.23          | 95.31             | 7.31            | 13.94           | 41.44            | 94.49          | 103.18          |
| 52               | 283.91                | 0.15             | 8.60          | 1.99            | 2.04             | 6.91           | 64.80             | 4.99            | 8.60            | 16.51            | 64.46          | 66.54           |
| 56               | 230.91                | 0.25             | 9.10          | 3.55            | 2.50             | 9.80           | 53.34             | 5.03            | 9.86            | 19.96            | 52.61          | 56.27           |
| 60               | 201.14                | 0.10             | 3.06          | 3.63            | 2.06             | 6.37           | 50.85             | 3.76            | 6.15            | 10.96            | 50.84          | 52.01           |
| 64               | 179.12                | 0.20             | 2.50          | 3.60            | 4.12             | 13.81          | 50.89             | 4.05            | 9.54            | 14.52            | 52.09          | 54.07           |
| 68               | 165.73                | 0.16             | 2.05          | 1.78            | 3.34             | 6.23           | 42.90             | 4.04            | 14.15           | 16.46            | 42.94          | 45.98           |

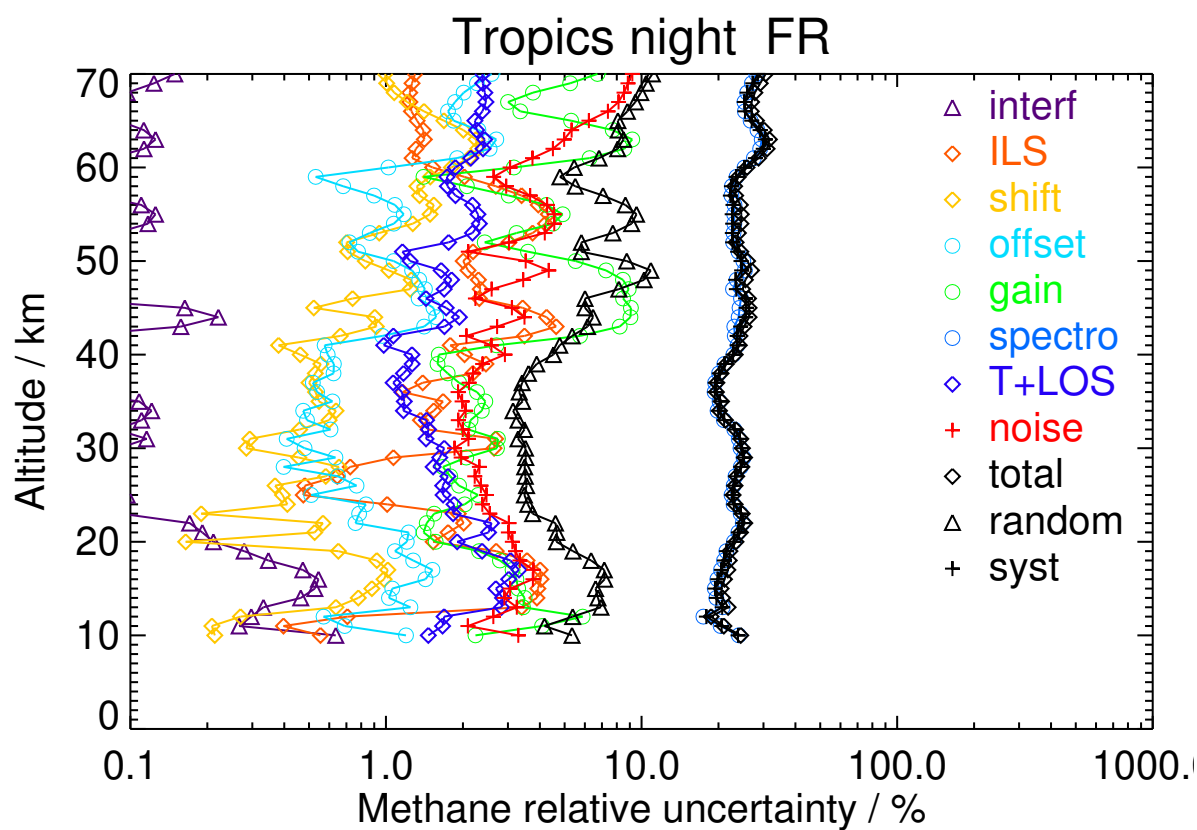

**Figure S18.** V8H\_CH4\_61 Tropics night

**Table S19.** Methane error budget for Southern midlatitude winter day. All uncertainties are  $1\sigma$ .

| altitude<br>(km) | mean target<br>(ppbv) | interf<br>(ppbv) | ILS<br>(ppbv) | shift<br>(ppbv) | offset<br>(ppbv) | gain<br>(ppbv) | spectro<br>(ppbv) | T+LOS<br>(ppbv) | noise<br>(ppbv) | random<br>(ppbv) | syst<br>(ppbv) | total<br>(ppbv) |
|------------------|-----------------------|------------------|---------------|-----------------|------------------|----------------|-------------------|-----------------|-----------------|------------------|----------------|-----------------|
| 9                | 1724.83               | 10.04            | 13.65         | 1.81            | 24.80            | 60.22          | 430.23            | 46.28           | 75.45           | 116.96           | 428.70         | 444.37          |
| 12               | 1717.92               | 5.54             | 26.68         | 2.03            | 16.81            | 77.22          | 385.37            | 36.98           | 53.84           | 101.45           | 386.62         | 399.71          |
| 15               | 1621.34               | 3.56             | 38.33         | 3.77            | 13.88            | 64.48          | 361.68            | 45.18           | 52.46           | 109.43           | 359.83         | 376.10          |
| 18               | 1665.52               | 2.77             | 107.20        | 5.21            | 16.65            | 125.37         | 351.33            | 71.59           | 50.84           | 140.66           | 372.67         | 398.33          |
| 21               | 1501.19               | 3.20             | 38.91         | 6.42            | 16.94            | 104.22         | 339.72            | 41.16           | 46.07           | 102.05           | 348.61         | 363.24          |
| 24               | 1313.53               | 1.43             | 38.07         | 11.76           | 13.11            | 71.45          | 318.82            | 27.57           | 40.58           | 80.22            | 323.24         | 333.05          |
| 27               | 1197.31               | 1.10             | 18.56         | 6.23            | 10.75            | 39.56          | 297.62            | 25.23           | 38.08           | 72.83            | 295.68         | 304.52          |
| 30               | 1194.72               | 1.24             | 20.34         | 3.84            | 9.73             | 29.56          | 302.09            | 26.99           | 35.43           | 88.50            | 294.63         | 307.63          |
| 33               | 808.06                | 0.93             | 10.71         | 3.34            | 7.60             | 14.91          | 203.13            | 19.00           | 30.52           | 66.16            | 196.43         | 207.27          |
| 36               | 547.53                | 0.57             | 10.10         | 3.05            | 6.37             | 13.17          | 142.17            | 11.63           | 25.90           | 54.64            | 135.49         | 146.10          |
| 39               | 374.52                | 0.41             | 12.47         | 3.44            | 5.06             | 16.79          | 97.66             | 7.45            | 21.23           | 54.40            | 86.95          | 102.56          |
| 42               | 260.73                | 0.39             | 7.28          | 2.31            | 3.55             | 10.94          | 66.74             | 4.91            | 17.15           | 32.91            | 62.29          | 70.45           |
| 45               | 258.31                | 0.47             | 6.81          | 1.90            | 4.04             | 16.61          | 59.01             | 5.95            | 15.13           | 28.43            | 57.28          | 63.95           |
| 48               | 261.42                | 0.16             | 3.92          | 2.53            | 2.66             | 12.27          | 60.02             | 3.87            | 7.81            | 24.14            | 57.23          | 62.11           |
| 52               | 254.34                | 0.24             | 8.53          | 1.95            | 3.58             | 11.51          | 61.40             | 3.62            | 10.01           | 24.33            | 59.27          | 64.07           |
| 56               | 211.73                | 0.33             | 6.74          | 3.38            | 4.68             | 12.54          | 58.68             | 4.26            | 12.76           | 31.00            | 53.84          | 62.13           |
| 60               | 195.80                | 0.17             | 2.71          | 1.66            | 2.50             | 5.40           | 49.42             | 3.73            | 9.60            | 19.54            | 47.04          | 50.93           |
| 64               | 136.90                | 0.22             | 1.76          | 1.75            | 2.62             | 6.07           | 43.95             | 3.14            | 9.61            | 20.32            | 40.88          | 45.65           |
| 68               | 93.49                 | 0.11             | 0.99          | 0.88            | 4.55             | 3.49           | 31.22             | 2.54            | 20.01           | 25.40            | 27.76          | 37.63           |

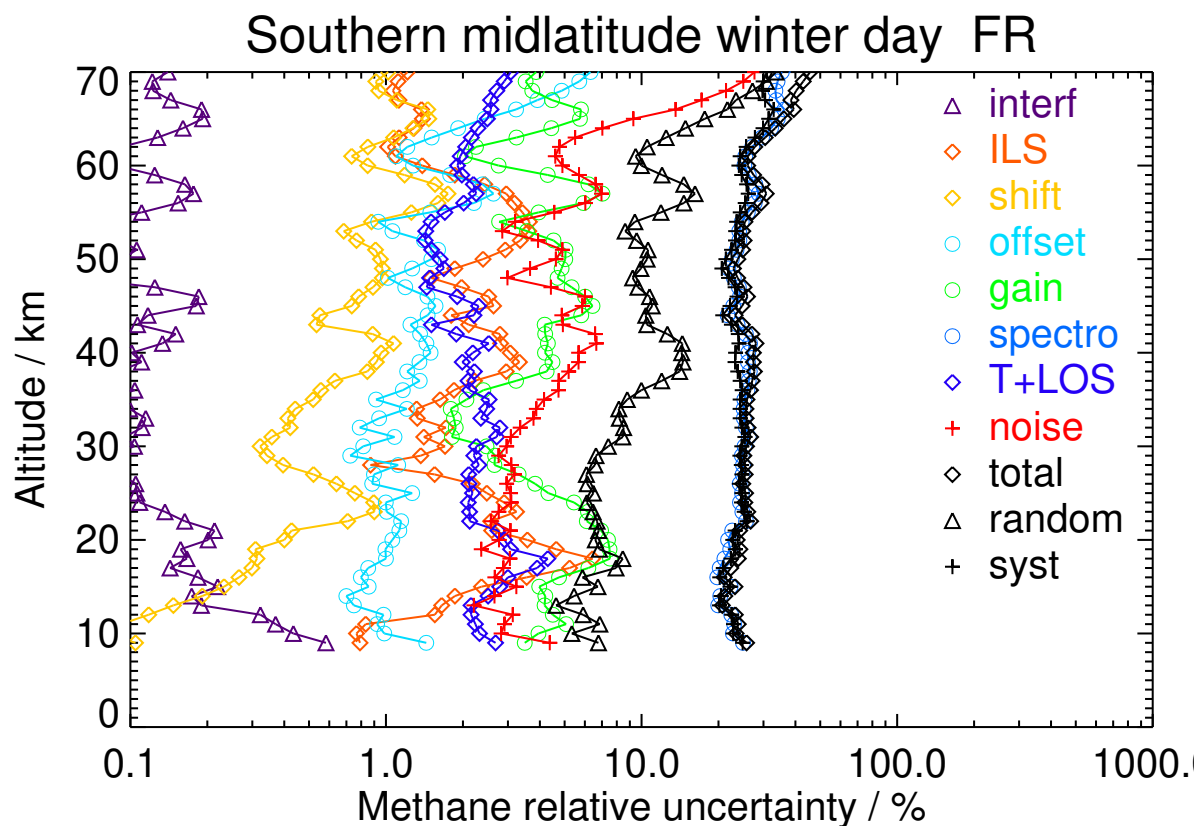

**Figure S19.** V8H\_CH4\_61 Southern midlatitude winter day

**Table S20.** Methane error budget for Southern midlatitude winter night. All uncertainties are  $1\sigma$ .

| altitude<br>(km) | mean target<br>(ppbv) | interf<br>(ppbv) | ILS<br>(ppbv) | shift<br>(ppbv) | offset<br>(ppbv) | gain<br>(ppbv) | spectro<br>(ppbv) | T+LOS<br>(ppbv) | noise<br>(ppbv) | random<br>(ppbv) | syst<br>(ppbv) | total<br>(ppbv) |
|------------------|-----------------------|------------------|---------------|-----------------|------------------|----------------|-------------------|-----------------|-----------------|------------------|----------------|-----------------|
| 9                | 1719.35               | 17.73            | 8.21          | 1.58            | 24.15            | 61.42          | 292.31            | 36.68           | 67.81           | 159.59           | 265.82         | 310.05          |
| 12               | 1738.30               | 5.18             | 27.09         | 1.47            | 15.66            | 85.66          | 353.93            | 34.76           | 47.15           | 106.45           | 354.56         | 370.19          |
| 15               | 1679.77               | 4.90             | 63.28         | 5.15            | 15.58            | 81.86          | 341.87            | 42.60           | 47.82           | 129.19           | 339.53         | 363.28          |
| 18               | 1615.11               | 3.06             | 96.55         | 5.09            | 17.17            | 115.70         | 318.67            | 54.53           | 46.75           | 150.00           | 327.49         | 360.21          |
| 21               | 1344.13               | 2.26             | 39.47         | 4.35            | 13.71            | 69.52          | 305.42            | 33.23           | 41.97           | 106.60           | 302.30         | 320.54          |
| 24               | 1218.30               | 1.05             | 57.53         | 8.92            | 13.11            | 62.73          | 294.40            | 29.06           | 40.37           | 102.34           | 293.55         | 310.88          |
| 27               | 1142.35               | 1.07             | 22.70         | 3.65            | 10.75            | 31.37          | 276.43            | 22.88           | 38.35           | 81.82            | 270.82         | 282.91          |
| 30               | 1090.16               | 1.25             | 14.74         | 3.25            | 8.78             | 21.12          | 283.64            | 22.90           | 34.69           | 89.17            | 273.83         | 287.98          |
| 33               | 887.58                | 0.91             | 14.85         | 3.52            | 7.04             | 20.65          | 205.55            | 18.43           | 30.18           | 71.34            | 197.79         | 210.26          |
| 36               | 576.62                | 0.43             | 9.57          | 2.40            | 5.78             | 17.77          | 140.45            | 11.61           | 24.55           | 55.78            | 133.41         | 144.61          |
| 39               | 391.15                | 0.36             | 11.89         | 2.58            | 4.63             | 17.64          | 93.62             | 7.00            | 19.99           | 38.55            | 90.60          | 98.46           |
| 42               | 265.45                | 0.25             | 7.99          | 1.91            | 3.53             | 14.52          | 67.95             | 5.17            | 16.53           | 31.16            | 65.09          | 72.16           |
| 45               | 233.29                | 0.39             | 5.17          | 1.34            | 3.31             | 13.57          | 57.27             | 5.05            | 12.97           | 26.52            | 54.71          | 60.80           |
| 48               | 248.30                | 0.22             | 3.71          | 1.67            | 2.47             | 10.78          | 61.51             | 3.26            | 8.80            | 25.43            | 58.00          | 63.33           |
| 52               | 238.51                | 0.23             | 7.48          | 1.72            | 3.72             | 14.37          | 59.93             | 3.81            | 9.98            | 27.57            | 56.79          | 63.13           |
| 56               | 220.02                | 0.27             | 4.43          | 2.77            | 3.91             | 11.51          | 55.43             | 4.02            | 10.53           | 26.64            | 51.62          | 58.09           |
| 60               | 185.67                | 0.20             | 1.26          | 1.53            | 2.93             | 5.58           | 47.35             | 3.60            | 10.57           | 21.02            | 44.37          | 49.10           |
| 64               | 135.03                | 0.19             | 1.88          | 1.18            | 2.36             | 5.65           | 35.93             | 3.42            | 9.40            | 16.55            | 34.05          | 37.86           |
| 68               | 85.03                 | 0.14             | 1.27          | 0.90            | 4.74             | 4.79           | 25.57             | 2.65            | 20.79           | 24.23            | 23.53          | 33.78           |

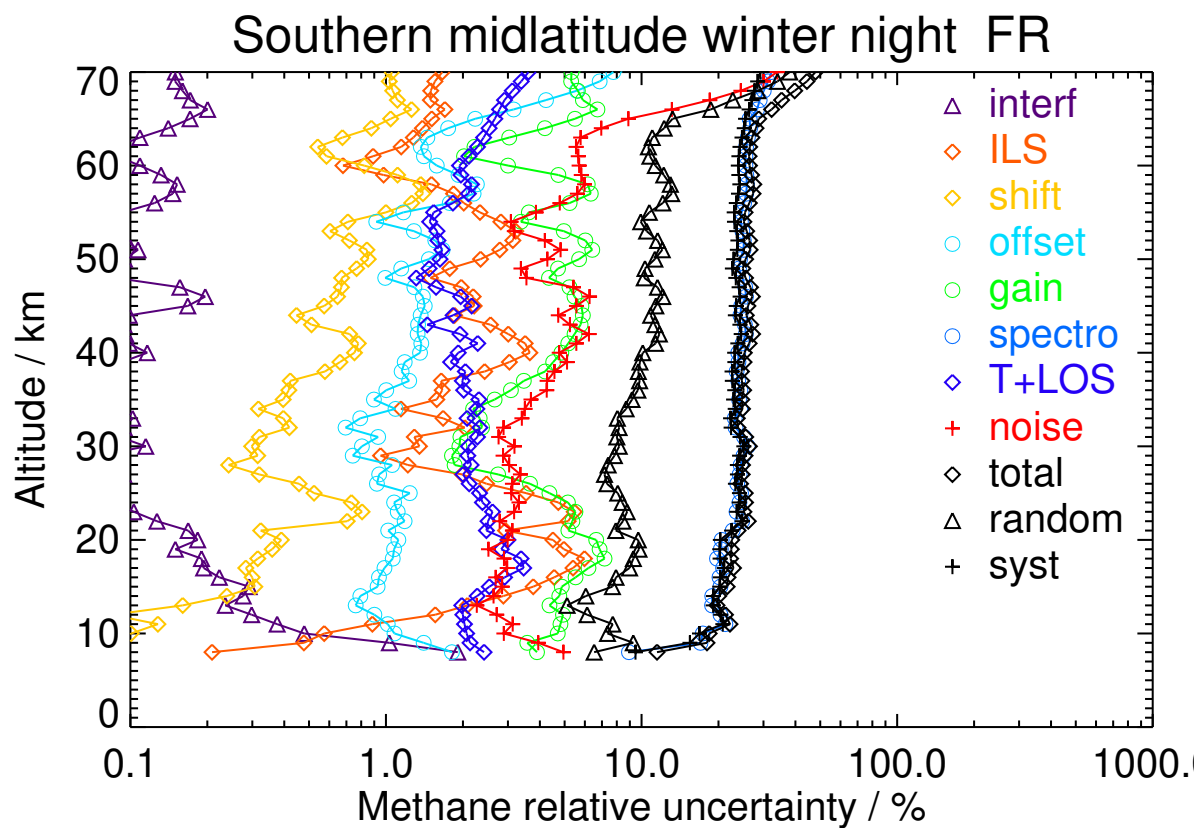

**Figure S20.** V8H\_CH4\_61 Southern midlatitude winter night

**Table S21.** Methane error budget for Southern midlatitude spring day. All uncertainties are  $1\sigma$ .

| altitude<br>(km) | mean target<br>(ppbv) | interf<br>(ppbv) | ILS<br>(ppbv) | shift<br>(ppbv) | offset<br>(ppbv) | gain<br>(ppbv) | spectro<br>(ppbv) | T+LOS<br>(ppbv) | noise<br>(ppbv) | random<br>(ppbv) | syst<br>(ppbv) | total<br>(ppbv) |
|------------------|-----------------------|------------------|---------------|-----------------|------------------|----------------|-------------------|-----------------|-----------------|------------------|----------------|-----------------|
| 9                | 1571.14               | 14.98            | 13.82         | 2.82            | 24.62            | 93.60          | 421.03            | 49.81           | 79.98           | 172.72           | 407.56         | 442.64          |
| 12               | 1762.20               | 6.92             | 39.07         | 1.51            | 13.63            | 100.81         | 344.24            | 39.58           | 45.46           | 102.05           | 351.63         | 366.14          |
| 15               | 1528.02               | 6.05             | 52.14         | 3.86            | 16.62            | 92.64          | 399.99            | 55.65           | 54.50           | 179.78           | 381.27         | 421.53          |
| 18               | 1679.59               | 4.60             | 169.00        | 8.87            | 22.69            | 182.25         | 308.29            | 80.11           | 48.81           | 241.05           | 328.83         | 407.72          |
| 21               | 1278.86               | 3.02             | 78.57         | 7.73            | 15.21            | 97.82          | 301.16            | 42.59           | 43.58           | 160.70           | 290.91         | 332.35          |
| 24               | 1105.11               | 1.15             | 65.75         | 12.53           | 10.65            | 63.62          | 320.75            | 28.03           | 39.26           | 152.40           | 301.04         | 337.42          |
| 27               | 1036.04               | 1.46             | 42.44         | 4.28            | 9.04             | 41.50          | 302.87            | 21.22           | 36.54           | 134.86           | 280.99         | 311.68          |
| 30               | 1096.31               | 1.83             | 34.49         | 2.62            | 7.27             | 30.11          | 289.70            | 20.98           | 35.08           | 112.93           | 273.87         | 296.24          |
| 33               | 809.88                | 0.96             | 15.23         | 3.94            | 5.78             | 17.49          | 181.89            | 15.58           | 28.30           | 59.15            | 176.68         | 186.32          |
| 36               | 603.18                | 0.53             | 7.09          | 2.33            | 5.08             | 16.08          | 132.30            | 9.43            | 22.54           | 44.05            | 128.45         | 135.80          |
| 39               | 481.72                | 0.47             | 9.11          | 2.85            | 4.56             | 16.54          | 99.05             | 6.36            | 18.44           | 34.30            | 96.95          | 102.84          |
| 42               | 466.03                | 0.37             | 8.38          | 3.52            | 4.14             | 18.24          | 106.94            | 5.58            | 16.47           | 29.14            | 106.40         | 110.32          |
| 45               | 453.72                | 0.55             | 15.65         | 1.61            | 6.29             | 35.18          | 101.29            | 7.92            | 12.90           | 41.31            | 101.52         | 109.60          |
| 48               | 420.79                | 0.32             | 10.18         | 3.99            | 6.46             | 36.33          | 103.33            | 7.19            | 11.00           | 40.69            | 103.32         | 111.05          |
| 52               | 341.33                | 0.21             | 8.18          | 2.40            | 4.27             | 19.99          | 83.02             | 4.86            | 10.70           | 29.88            | 81.41          | 86.72           |
| 56               | 245.57                | 0.30             | 9.23          | 4.34            | 3.45             | 12.84          | 68.95             | 5.40            | 9.75            | 24.16            | 67.65          | 71.83           |
| 60               | 220.25                | 0.21             | 3.10          | 2.64            | 2.43             | 5.54           | 51.75             | 3.85            | 8.61            | 14.73            | 51.02          | 53.10           |
| 64               | 126.35                | 0.29             | 1.98          | 3.13            | 4.26             | 14.63          | 48.39             | 4.29            | 7.94            | 18.52            | 48.23          | 51.66           |
| 68               | 94.98                 | 0.18             | 1.97          | 1.86            | 5.12             | 12.02          | 36.99             | 3.18            | 19.27           | 25.23            | 35.94          | 43.91           |

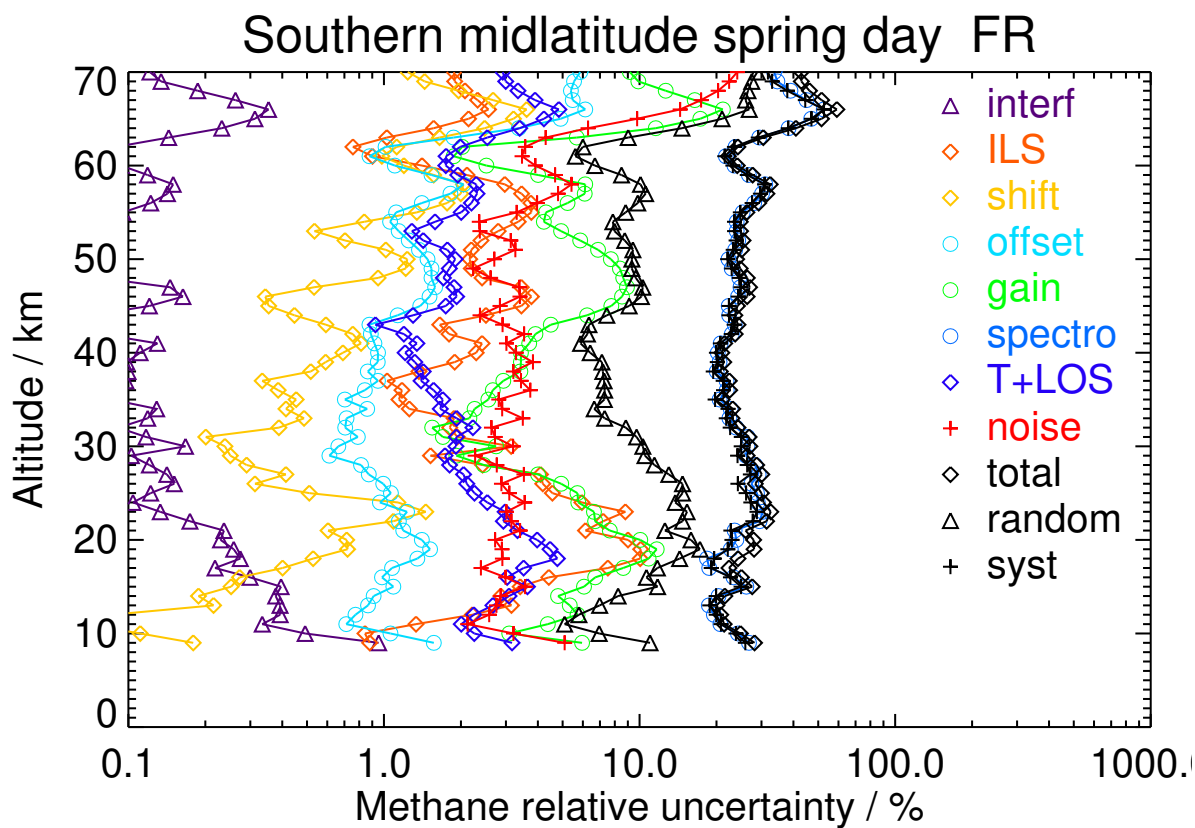

**Figure S21.** V8H\_CH4\_61 Southern midlatitude spring day

**Table S22.** Methane error budget for Southern midlatitude spring night. All uncertainties are  $1\sigma$ .

| altitude<br>(km) | mean target<br>(ppbv) | interf<br>(ppbv) | ILS<br>(ppbv) | shift<br>(ppbv) | offset<br>(ppbv) | gain<br>(ppbv) | spectro<br>(ppbv) | T+LOS<br>(ppbv) | noise<br>(ppbv) | random<br>(ppbv) | syst<br>(ppbv) | total<br>(ppbv) |
|------------------|-----------------------|------------------|---------------|-----------------|------------------|----------------|-------------------|-----------------|-----------------|------------------|----------------|-----------------|
| 9                | 1551.85               | 15.99            | 22.75         | 3.41            | 27.27            | 113.96         | 420.20            | 55.05           | 88.60           | 177.56           | 412.84         | 449.40          |
| 12               | 1718.93               | 6.39             | 33.94         | 2.30            | 13.75            | 94.10          | 357.91            | 34.50           | 47.72           | 109.84           | 360.20         | 376.57          |
| 15               | 1632.59               | 4.70             | 62.21         | 4.04            | 16.59            | 114.44         | 452.22            | 63.70           | 55.87           | 173.51           | 445.94         | 478.50          |
| 18               | 1870.41               | 2.94             | 204.74        | 13.89           | 22.44            | 227.62         | 328.69            | 99.78           | 48.42           | 216.09           | 409.97         | 463.43          |
| 21               | 1616.04               | 3.18             | 98.96         | 7.15            | 23.84            | 184.93         | 321.83            | 58.48           | 44.81           | 164.35           | 355.82         | 391.94          |
| 24               | 1467.22               | 1.33             | 57.84         | 16.42           | 16.49            | 126.72         | 330.63            | 32.85           | 42.16           | 125.50           | 341.13         | 363.48          |
| 27               | 1353.35               | 1.19             | 38.25         | 6.73            | 9.02             | 48.55          | 329.21            | 24.97           | 39.01           | 80.20            | 328.70         | 338.34          |
| 30               | 1380.19               | 1.89             | 35.15         | 2.85            | 8.00             | 47.30          | 339.67            | 27.10           | 36.51           | 61.23            | 342.40         | 347.84          |
| 33               | 976.98                | 0.89             | 11.92         | 3.95            | 6.02             | 16.15          | 232.58            | 20.98           | 30.04           | 50.49            | 230.96         | 236.41          |
| 36               | 657.96                | 0.55             | 9.49          | 2.59            | 4.74             | 17.07          | 157.28            | 12.81           | 23.23           | 39.46            | 155.87         | 160.78          |
| 39               | 475.92                | 0.37             | 8.50          | 3.31            | 4.55             | 18.11          | 100.55            | 7.23            | 19.98           | 33.62            | 99.32          | 104.85          |
| 42               | 418.96                | 0.38             | 8.64          | 4.24            | 4.18             | 15.36          | 95.36             | 6.63            | 17.95           | 30.26            | 94.29          | 99.02           |
| 45               | 389.18                | 0.34             | 8.24          | 1.29            | 4.87             | 25.54          | 86.75             | 6.32            | 11.79           | 27.47            | 87.72          | 91.92           |
| 48               | 358.17                | 0.27             | 4.55          | 3.09            | 4.19             | 23.55          | 90.74             | 5.19            | 11.37           | 23.83            | 91.78          | 94.83           |
| 52               | 318.78                | 0.24             | 6.40          | 3.53            | 4.16             | 18.92          | 74.07             | 4.73            | 11.73           | 22.58            | 74.59          | 77.94           |
| 56               | 251.09                | 0.31             | 10.93         | 3.95            | 3.01             | 9.87           | 63.98             | 4.83            | 9.44            | 18.94            | 63.94          | 66.69           |
| 60               | 199.35                | 0.26             | 4.17          | 3.03            | 3.03             | 6.57           | 50.64             | 3.81            | 8.90            | 14.97            | 50.13          | 52.32           |
| 64               | 134.57                | 0.29             | 2.42          | 2.78            | 3.21             | 10.20          | 42.80             | 3.92            | 7.04            | 14.43            | 42.62          | 45.00           |
| 68               | 86.92                 | 0.20             | 1.98          | 1.87            | 4.60             | 10.43          | 32.71             | 3.24            | 16.91           | 21.81            | 32.06          | 38.77           |

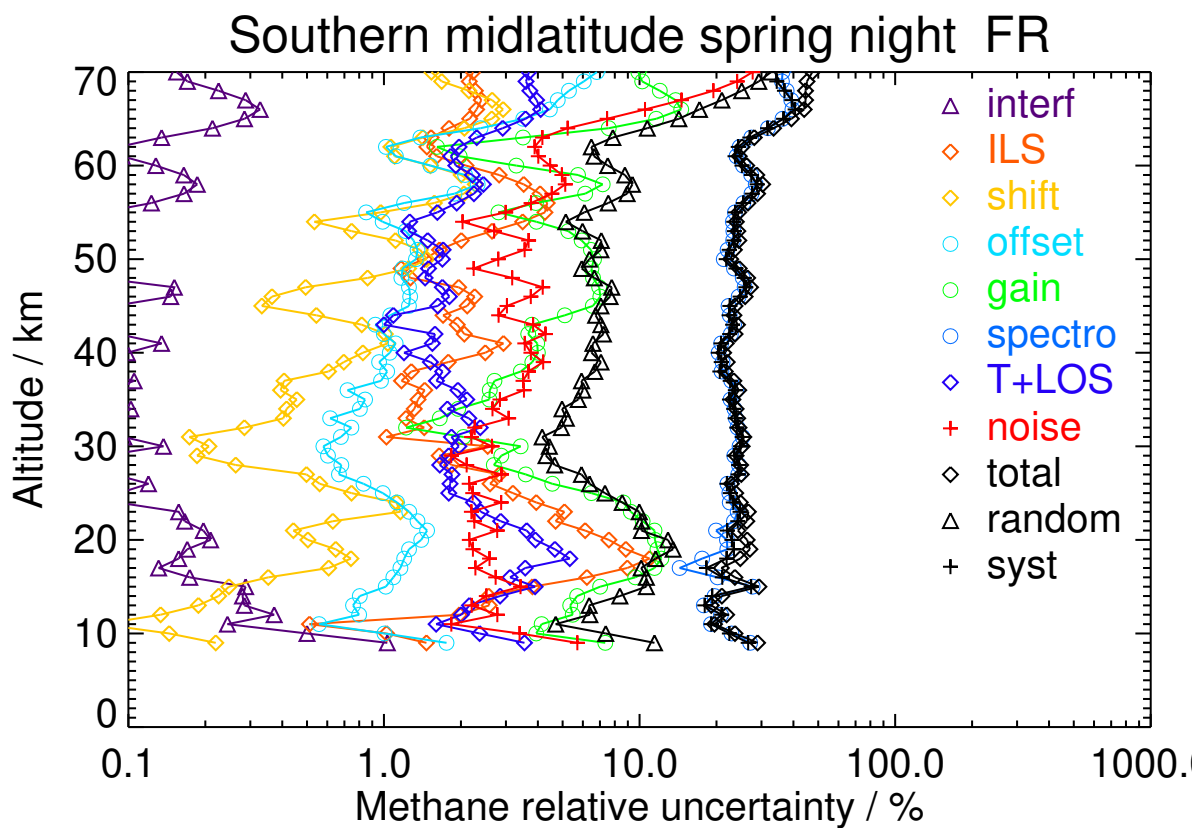

**Figure S22.** V8H\_CH4\_61 Southern midlatitude spring night

**Table S23.** Methane error budget for Southern midlatitude summer day. All uncertainties are  $1\sigma$ .

| altitude<br>(km) | mean target<br>(ppbv) | interf<br>(ppbv) | ILS<br>(ppbv) | shift<br>(ppbv) | offset<br>(ppbv) | gain<br>(ppbv) | spectro<br>(ppbv) | T+LOS<br>(ppbv) | noise<br>(ppbv) | random<br>(ppbv) | syst<br>(ppbv) | total<br>(ppbv) |
|------------------|-----------------------|------------------|---------------|-----------------|------------------|----------------|-------------------|-----------------|-----------------|------------------|----------------|-----------------|
| 9                | 1715.91               | 28.26            | 11.99         | 1.56            | 22.89            | 61.04          | 343.57            | 35.42           | 76.26           | 185.43           | 309.71         | 360.98          |
| 12               | 1738.40               | 6.10             | 36.56         | 1.40            | 13.65            | 111.22         | 325.95            | 33.12           | 44.47           | 121.76           | 329.28         | 351.07          |
| 15               | 1668.76               | 6.89             | 62.00         | 3.25            | 14.55            | 91.46          | 332.05            | 44.14           | 50.23           | 137.31           | 329.17         | 356.66          |
| 18               | 1453.19               | 3.35             | 52.67         | 2.85            | 10.89            | 58.62          | 320.61            | 42.44           | 42.88           | 113.58           | 316.04         | 335.83          |
| 21               | 1141.32               | 2.12             | 71.65         | 3.66            | 10.50            | 39.38          | 292.55            | 33.32           | 40.81           | 72.72            | 299.81         | 308.50          |
| 24               | 1141.56               | 1.35             | 62.88         | 6.33            | 8.56             | 21.38          | 285.57            | 26.29           | 38.19           | 56.85            | 291.53         | 297.03          |
| 27               | 1044.41               | 1.26             | 34.80         | 4.47            | 7.33             | 13.82          | 255.75            | 19.93           | 35.38           | 55.52            | 255.84         | 261.79          |
| 30               | 1028.09               | 1.70             | 28.91         | 2.99            | 6.40             | 24.40          | 248.62            | 18.18           | 32.17           | 50.03            | 249.31         | 254.29          |
| 33               | 843.79                | 1.19             | 21.91         | 4.63            | 5.65             | 19.38          | 177.96            | 12.54           | 26.76           | 34.02            | 179.71         | 182.90          |
| 36               | 719.12                | 0.58             | 6.20          | 1.99            | 4.99             | 9.83           | 149.22            | 9.34            | 22.90           | 29.05            | 148.99         | 151.79          |
| 39               | 562.14                | 0.81             | 16.31         | 3.30            | 4.54             | 15.96          | 119.62            | 6.70            | 19.89           | 27.38            | 120.63         | 123.70          |
| 42               | 417.07                | 0.35             | 5.87          | 3.12            | 3.23             | 9.26           | 105.74            | 5.51            | 19.19           | 26.76            | 104.90         | 108.26          |
| 45               | 367.52                | 0.71             | 24.93         | 4.24            | 5.88             | 37.60          | 82.95             | 7.97            | 16.63           | 34.55            | 90.09          | 96.49           |
| 48               | 269.79                | 0.22             | 6.27          | 2.28            | 3.17             | 21.22          | 70.07             | 3.36            | 8.04            | 24.17            | 70.05          | 74.10           |
| 52               | 201.28                | 0.19             | 3.95          | 2.06            | 2.87             | 14.00          | 51.83             | 3.02            | 10.97           | 26.24            | 48.49          | 55.13           |
| 56               | 165.34                | 0.27             | 5.61          | 2.88            | 2.38             | 8.16           | 44.81             | 3.27            | 10.73           | 21.54            | 42.22          | 47.39           |
| 60               | 176.15                | 0.16             | 3.51          | 2.64            | 1.44             | 3.48           | 42.41             | 2.68            | 6.57            | 17.57            | 39.67          | 43.38           |
| 64               | 164.85                | 0.27             | 1.18          | 3.06            | 2.91             | 10.10          | 57.16             | 2.62            | 7.75            | 14.77            | 56.90          | 58.79           |
| 68               | 195.75                | 0.19             | 2.82          | 2.64            | 3.83             | 6.39           | 54.57             | 3.61            | 16.46           | 19.70            | 54.26          | 57.73           |

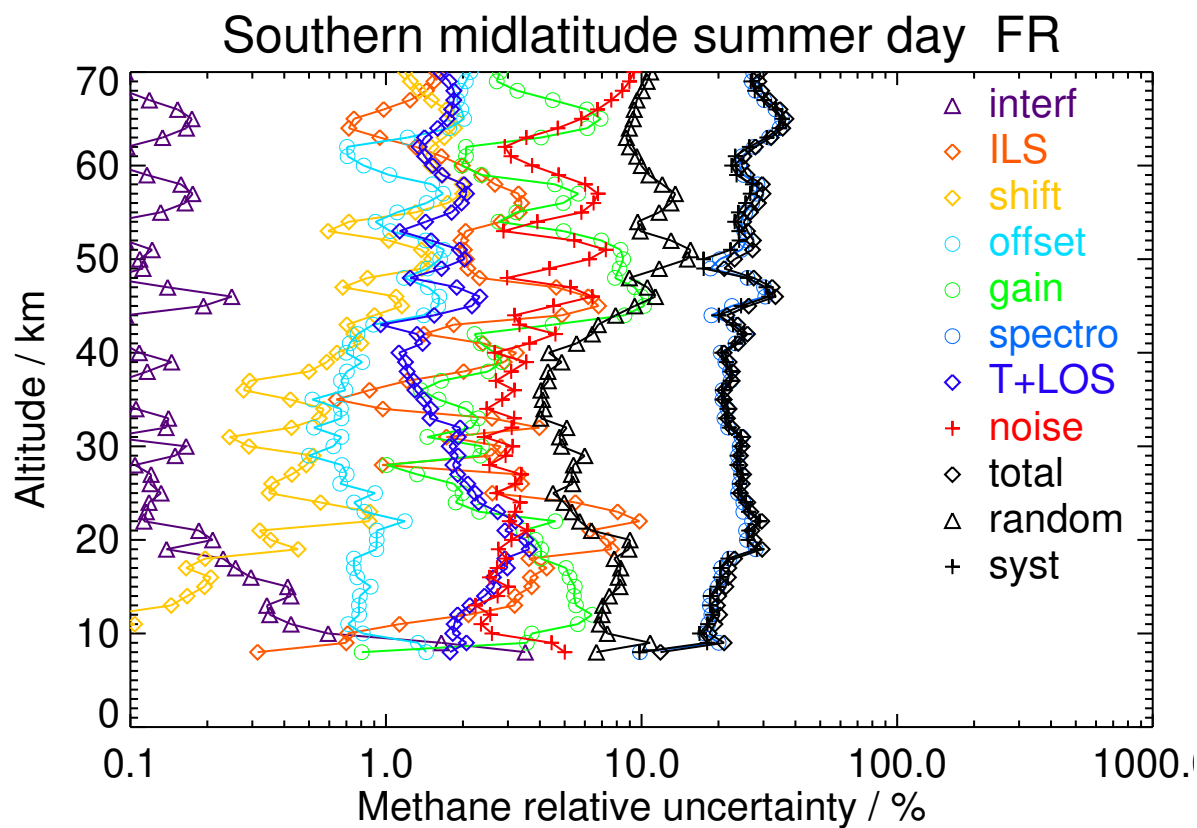

**Figure S23.** V8H\_CH4\_61 Southern midlatitude summer day

**Table S24.** Methane error budget for Southern midlatitude summer night. All uncertainties are  $1\sigma$ .

| altitude<br>(km) | mean target<br>(ppbv) | interf<br>(ppbv) | ILS<br>(ppbv) | shift<br>(ppbv) | offset<br>(ppbv) | gain<br>(ppbv) | spectro<br>(ppbv) | T+LOS<br>(ppbv) | noise<br>(ppbv) | random<br>(ppbv) | syst<br>(ppbv) | total<br>(ppbv) |
|------------------|-----------------------|------------------|---------------|-----------------|------------------|----------------|-------------------|-----------------|-----------------|------------------|----------------|-----------------|
| 9                | 1717.87               | 29.72            | 14.89         | 1.82            | 22.51            | 64.43          | 331.56            | 34.49           | 69.65           | 186.26           | 295.04         | 348.91          |
| 12               | 1740.90               | 6.08             | 39.84         | 1.66            | 16.43            | 98.89          | 391.05            | 37.55           | 44.92           | 108.48           | 395.29         | 409.91          |
| 15               | 1801.29               | 6.19             | 103.78        | 4.85            | 18.50            | 137.07         | 369.56            | 54.46           | 52.91           | 133.65           | 392.99         | 415.09          |
| 18               | 1621.47               | 3.02             | 128.33        | 4.19            | 17.18            | 136.65         | 331.64            | 53.93           | 41.53           | 181.50           | 342.26         | 387.40          |
| 21               | 1241.11               | 2.31             | 70.11         | 6.92            | 11.08            | 45.60          | 291.16            | 30.29           | 37.78           | 101.58           | 289.78         | 307.07          |
| 24               | 1100.45               | 1.38             | 55.24         | 5.29            | 9.16             | 25.89          | 273.85            | 24.70           | 35.53           | 61.30            | 277.39         | 284.08          |
| 27               | 1087.19               | 1.38             | 32.45         | 5.40            | 7.99             | 17.70          | 254.17            | 20.65           | 34.04           | 60.11            | 253.05         | 260.09          |
| 30               | 992.91                | 1.51             | 26.15         | 3.09            | 6.60             | 22.21          | 253.09            | 18.74           | 30.94           | 50.44            | 253.09         | 258.06          |
| 33               | 854.29                | 1.16             | 24.52         | 4.50            | 5.80             | 20.45          | 187.02            | 13.53           | 26.06           | 37.26            | 188.48         | 192.13          |
| 36               | 709.58                | 0.73             | 5.96          | 1.60            | 4.99             | 9.64           | 152.54            | 9.42            | 22.69           | 28.91            | 152.29         | 155.01          |
| 39               | 586.63                | 0.71             | 15.18         | 2.60            | 4.45             | 13.04          | 124.22            | 7.06            | 20.39           | 27.79            | 124.71         | 127.77          |
| 42               | 433.33                | 0.41             | 7.73          | 3.58            | 3.52             | 15.69          | 115.77            | 5.81            | 19.06           | 29.24            | 115.22         | 118.87          |
| 45               | 354.91                | 0.74             | 22.82         | 3.82            | 5.66             | 37.22          | 91.92             | 7.84            | 17.66           | 36.67            | 97.12          | 103.81          |
| 48               | 253.37                | 0.25             | 7.24          | 2.22            | 2.87             | 18.73          | 67.19             | 3.08            | 9.35            | 22.99            | 67.08          | 70.91           |
| 52               | 187.83                | 0.19             | 3.72          | 2.09            | 2.71             | 13.09          | 47.83             | 2.76            | 11.54           | 22.07            | 46.24          | 51.24           |
| 56               | 146.76                | 0.29             | 5.52          | 3.41            | 2.98             | 13.86          | 38.56             | 3.87            | 11.69           | 19.59            | 38.69          | 43.37           |
| 60               | 164.84                | 0.15             | 2.90          | 2.66            | 1.35             | 3.18           | 39.22             | 2.65            | 6.28            | 16.89            | 36.43          | 40.15           |
| 64               | 167.26                | 0.28             | 1.42          | 2.60            | 2.75             | 10.74          | 48.69             | 2.53            | 7.16            | 15.00            | 48.32          | 50.60           |
| 68               | 177.02                | 0.17             | 1.63          | 2.12            | 3.32             | 5.86           | 46.58             | 3.74            | 14.47           | 17.22            | 46.36          | 49.45           |

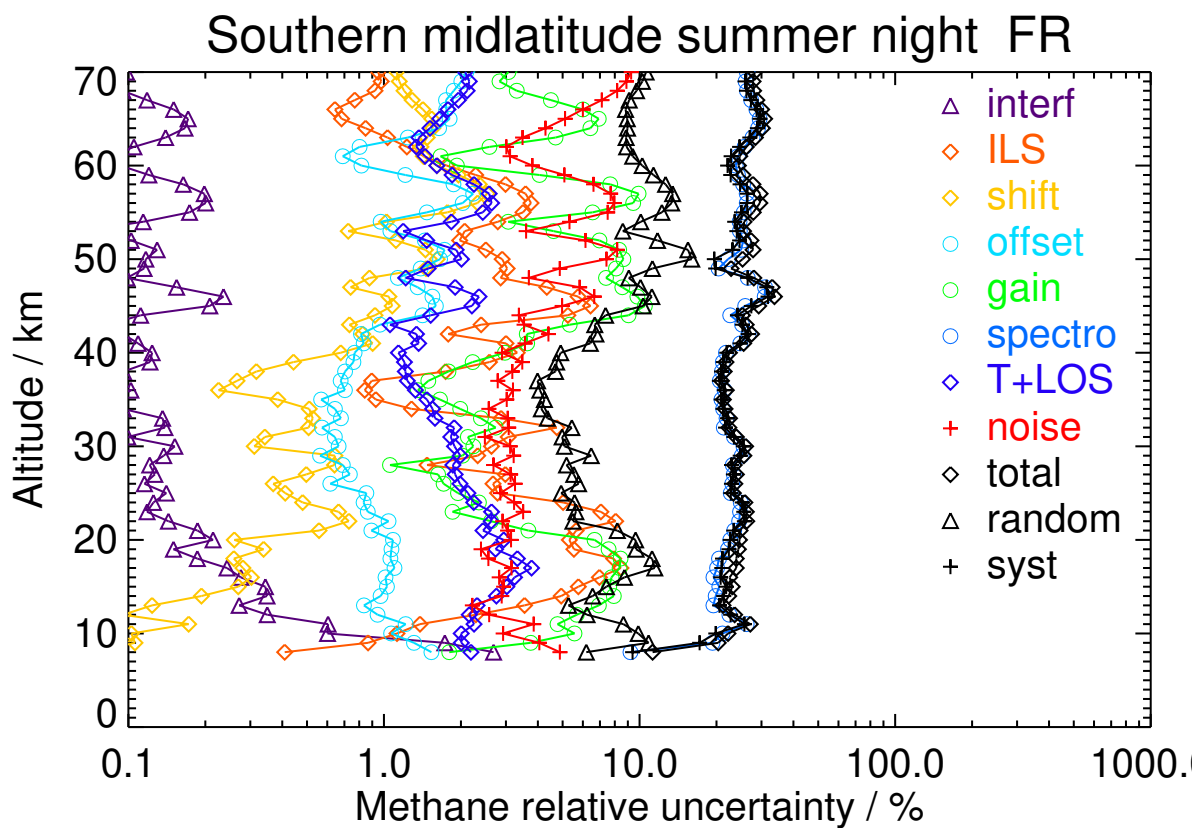

**Figure S24.** V8H\_CH4\_61 Southern midlatitude summer night



**Table S25.** Methane error budget for Southern midlatitude autumn day. All uncertainties are  $1\sigma$ .

| altitude<br>(km) | mean target<br>(ppbv) | interf<br>(ppbv) | ILS<br>(ppbv) | shift<br>(ppbv) | offset<br>(ppbv) | gain<br>(ppbv) | spectro<br>(ppbv) | T+LOS<br>(ppbv) | noise<br>(ppbv) | random<br>(ppbv) | syst<br>(ppbv) | total<br>(ppbv) |
|------------------|-----------------------|------------------|---------------|-----------------|------------------|----------------|-------------------|-----------------|-----------------|------------------|----------------|-----------------|
| 12               | 1782.34               | 4.07             | 30.41         | 1.47            | 12.74            | 92.12          | 340.86            | 32.88           | 36.38           | 81.38            | 348.65         | 358.03          |
| 15               | 1711.88               | 4.36             | 62.44         | 4.03            | 15.26            | 88.94          | 340.18            | 44.52           | 45.72           | 119.48           | 342.92         | 363.14          |
| 18               | 1606.85               | 1.83             | 54.48         | 4.46            | 19.67            | 136.79         | 319.51            | 35.66           | 35.91           | 125.72           | 333.06         | 356.00          |
| 21               | 1262.38               | 1.69             | 64.21         | 12.34           | 15.15            | 76.61          | 327.16            | 28.52           | 32.40           | 103.68           | 329.43         | 345.36          |
| 24               | 1170.47               | 1.28             | 29.90         | 2.97            | 13.03            | 53.92          | 282.75            | 23.34           | 31.07           | 79.41            | 281.31         | 292.30          |
| 27               | 1023.92               | 1.10             | 12.06         | 4.94            | 9.82             | 16.95          | 242.14            | 20.04           | 29.88           | 54.83            | 239.74         | 245.93          |
| 30               | 981.39                | 0.84             | 19.49         | 3.19            | 7.83             | 21.39          | 239.68            | 20.17           | 25.41           | 48.47            | 238.87         | 243.74          |
| 33               | 811.19                | 0.56             | 8.40          | 3.60            | 7.49             | 21.75          | 189.28            | 14.74           | 23.42           | 46.22            | 187.27         | 192.89          |
| 36               | 650.85                | 0.45             | 7.02          | 2.55            | 6.41             | 25.96          | 153.10            | 10.64           | 21.48           | 46.86            | 150.30         | 157.43          |
| 39               | 540.85                | 0.39             | 15.32         | 4.08            | 6.57             | 26.28          | 129.51            | 8.39            | 20.19           | 50.25            | 125.34         | 135.04          |
| 42               | 465.37                | 0.31             | 16.93         | 2.04            | 5.82             | 29.17          | 116.80            | 5.75            | 14.69           | 49.44            | 112.35         | 122.75          |
| 45               | 382.98                | 0.71             | 15.87         | 2.30            | 6.08             | 31.34          | 100.15            | 6.46            | 15.71           | 44.77            | 97.93          | 107.68          |
| 48               | 368.89                | 0.23             | 4.55          | 4.46            | 5.90             | 28.70          | 83.93             | 7.30            | 10.81           | 38.39            | 81.48          | 90.07           |
| 52               | 332.83                | 0.21             | 7.99          | 1.72            | 4.31             | 16.44          | 74.60             | 5.13            | 7.71            | 24.38            | 73.57          | 77.50           |
| 56               | 218.96                | 0.50             | 5.01          | 4.81            | 6.26             | 17.42          | 71.63             | 6.46            | 15.14           | 29.97            | 69.96          | 76.11           |
| 60               | 247.59                | 0.15             | 2.75          | 1.89            | 1.96             | 3.82           | 59.45             | 4.58            | 8.40            | 16.81            | 58.08          | 60.46           |
| 64               | 134.62                | 0.21             | 1.46          | 2.32            | 3.57             | 9.97           | 43.24             | 3.52            | 9.24            | 22.09            | 39.99          | 45.69           |
| 68               | 79.59                 | 0.07             | 1.25          | 0.40            | 3.63             | 1.75           | 24.31             | 2.47            | 15.97           | 19.15            | 22.44          | 29.50           |

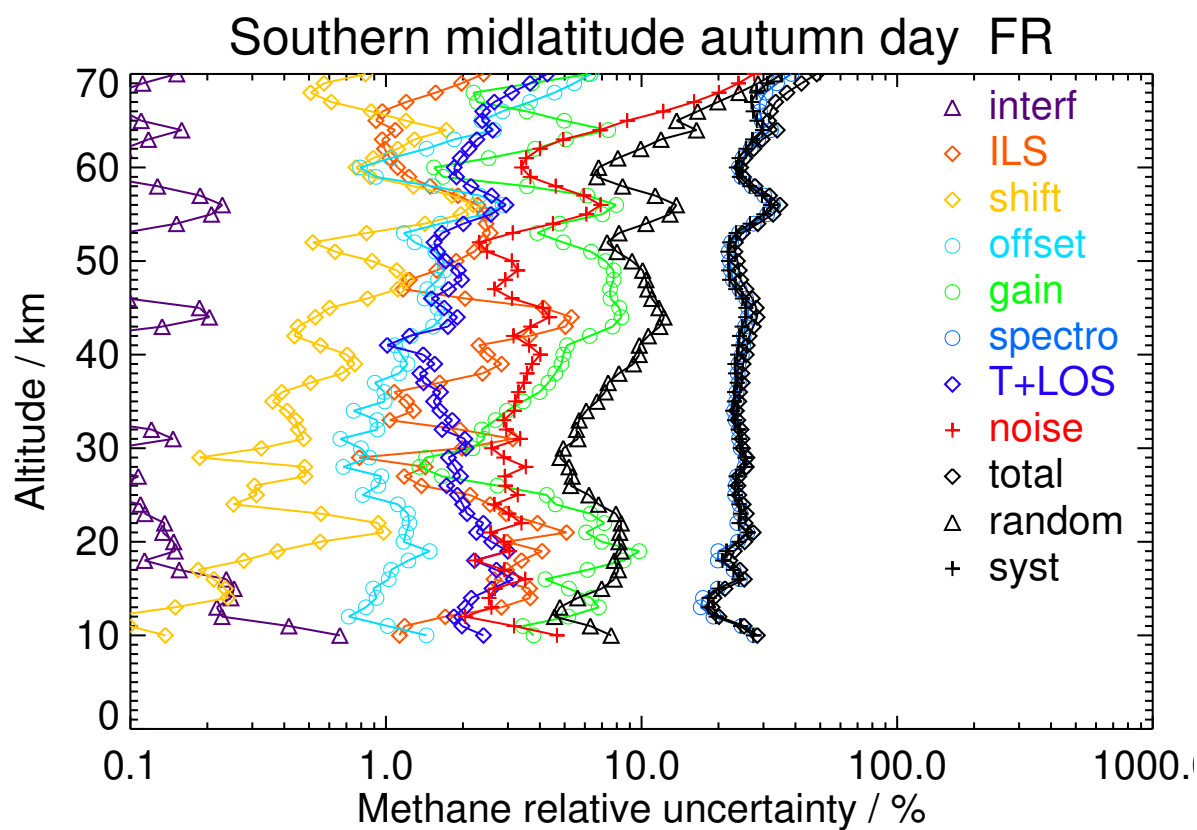

**Figure S25.** V8H\_CH4\_61 Southern midlatitude autumn day



**Table S26.** Methane error budget for Southern midlatitude autumn night. All uncertainties are  $1\sigma$ .

| altitude (km) | mean target (ppbv) | interf (ppbv) | ILS (ppbv) | shift (ppbv) | offset (ppbv) | gain (ppbv) | spectro (ppbv) | T+LOS (ppbv) | noise (ppbv) | random (ppbv) | syst (ppbv) | total (ppbv) |
|---------------|--------------------|---------------|------------|--------------|---------------|-------------|----------------|--------------|--------------|---------------|-------------|--------------|
| 12            | 1819.62            | 4.94          | 42.94      | 1.79         | 15.45         | 121.26      | 353.98         | 37.14        | 39.93        | 82.34         | 371.90      | 380.90       |
| 15            | 1769.79            | 4.90          | 57.28      | 3.53         | 14.20         | 74.16       | 358.43         | 45.64        | 46.60        | 96.81         | 363.83      | 376.49       |
| 18            | 1715.79            | 2.35          | 47.67      | 5.38         | 22.58         | 155.32      | 311.50         | 37.75        | 35.88        | 110.05        | 338.49      | 355.94       |
| 21            | 1259.34            | 1.88          | 75.59      | 13.31        | 16.37         | 78.67       | 314.08         | 31.97        | 34.00        | 107.36        | 318.83      | 336.42       |
| 24            | 1172.69            | 1.39          | 20.18      | 2.46         | 11.89         | 34.00       | 274.32         | 23.99        | 32.01        | 62.54         | 273.22      | 280.29       |
| 27            | 1031.80            | 1.23          | 11.98      | 5.78         | 9.37          | 15.01       | 236.01         | 20.30        | 29.76        | 48.91         | 234.73      | 239.77       |
| 30            | 987.22             | 0.82          | 20.90      | 3.44         | 7.54          | 22.59       | 231.90         | 19.68        | 24.91        | 48.72         | 231.14      | 236.22       |
| 33            | 804.90             | 0.55          | 8.50       | 3.98         | 7.12          | 18.33       | 173.61         | 14.73        | 22.64        | 44.74         | 171.30      | 177.05       |
| 36            | 703.98             | 0.51          | 6.13       | 2.15         | 6.25          | 21.21       | 143.78         | 10.22        | 21.41        | 46.78         | 139.93      | 147.54       |
| 39            | 580.40             | 0.60          | 16.05      | 4.42         | 5.66          | 16.65       | 115.49         | 7.96         | 19.01        | 44.98         | 111.02      | 119.79       |
| 42            | 471.14             | 0.29          | 10.06      | 2.29         | 5.06          | 22.76       | 111.09         | 4.92         | 13.97        | 45.46         | 105.57      | 114.94       |
| 45            | 437.34             | 0.72          | 13.03      | 1.63         | 5.79          | 30.73       | 111.12         | 7.59         | 17.45        | 43.74         | 109.30      | 117.73       |
| 48            | 357.56             | 0.27          | 4.96       | 5.05         | 5.23          | 27.63       | 86.55          | 6.36         | 10.84        | 42.45         | 81.78       | 92.14        |
| 52            | 311.18             | 0.13          | 10.26      | 1.34         | 3.74          | 14.48       | 70.75          | 4.49         | 7.15         | 23.06         | 69.82       | 73.53        |
| 56            | 271.89             | 0.46          | 6.03       | 5.27         | 6.02          | 19.01       | 73.99          | 6.48         | 12.82        | 28.73         | 72.92       | 78.37        |
| 60            | 244.38             | 0.16          | 2.56       | 2.46         | 2.06          | 4.36        | 59.59          | 4.74         | 8.04         | 17.56         | 58.01       | 60.61        |
| 64            | 166.43             | 0.20          | 2.49       | 2.27         | 3.70          | 10.55       | 46.24          | 4.39         | 9.51         | 20.09         | 44.50       | 48.83        |
| 68            | 91.19              | 0.09          | 1.96       | 0.63         | 3.69          | 3.58        | 29.34          | 3.10         | 16.26        | 22.05         | 26.06       | 34.14        |

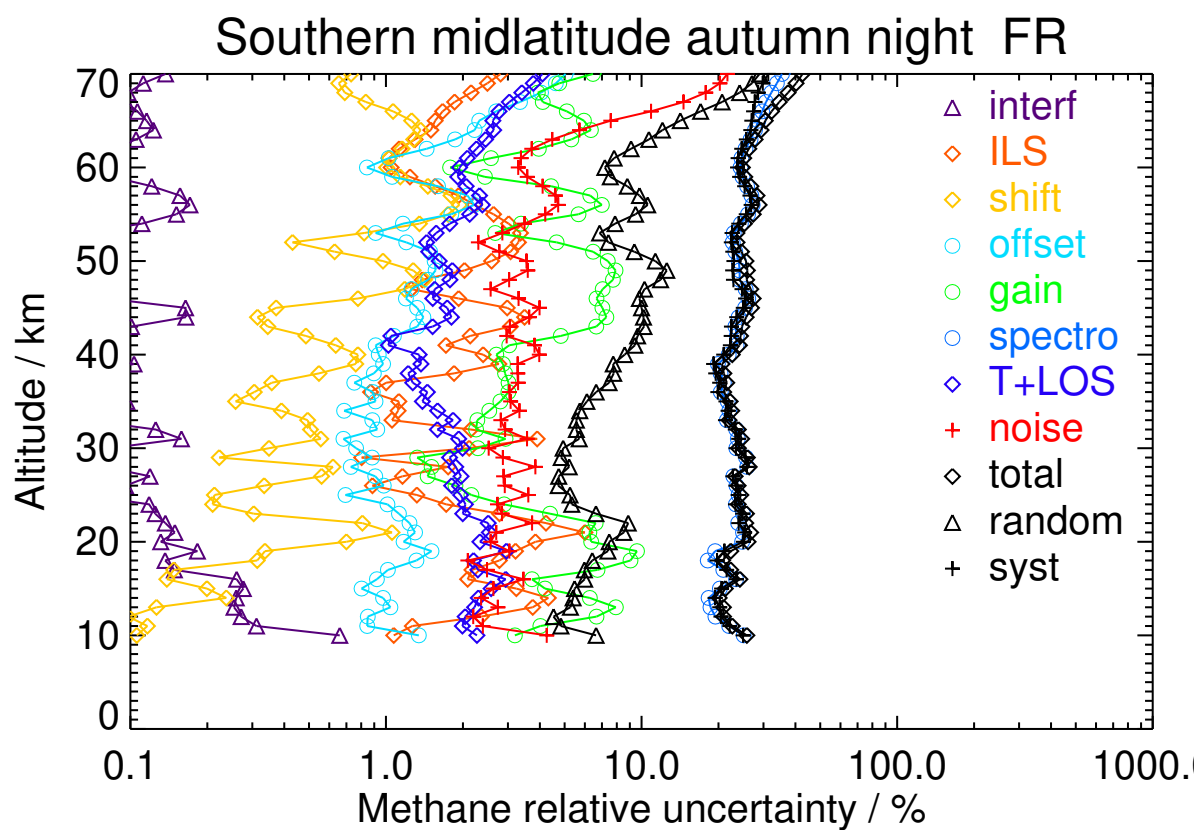

**Figure S26.** V8H\_CH4\_61 Southern midlatitude autumn night

**Table S27.** Methane error budget for Southern polar winter day. All uncertainties are  $1\sigma$ .

| altitude<br>(km) | mean target<br>(ppbv) | interf<br>(ppbv) | ILS<br>(ppbv) | shift<br>(ppbv) | offset<br>(ppbv) | gain<br>(ppbv) | spectro<br>(ppbv) | T+LOS<br>(ppbv) | noise<br>(ppbv) | random<br>(ppbv) | syst<br>(ppbv) | total<br>(ppbv) |
|------------------|-----------------------|------------------|---------------|-----------------|------------------|----------------|-------------------|-----------------|-----------------|------------------|----------------|-----------------|
| 9                | 1728.40               | 30.76            | 8.41          | 1.45            | 31.97            | 58.62          | 338.44            | 53.37           | 78.99           | 153.19           | 325.03         | 359.32          |
| 12               | 1731.06               | 11.51            | 12.54         | 3.17            | 26.65            | 71.85          | 375.50            | 63.50           | 68.37           | 114.32           | 377.90         | 394.82          |
| 15               | 1426.38               | 13.48            | 18.39         | 4.97            | 24.68            | 59.63          | 293.79            | 62.47           | 71.46           | 112.65           | 295.54         | 316.28          |
| 18               | 1134.57               | 5.24             | 21.74         | 6.04            | 18.53            | 49.24          | 277.63            | 46.72           | 51.81           | 92.24            | 277.03         | 291.98          |
| 21               | 1005.48               | 3.34             | 15.60         | 9.42            | 14.98            | 45.23          | 249.82            | 31.12           | 48.83           | 78.21            | 249.52         | 261.49          |
| 24               | 547.81                | 1.09             | 11.14         | 2.52            | 8.88             | 11.48          | 160.22            | 20.59           | 42.34           | 60.83            | 156.62         | 168.02          |
| 27               | 370.08                | 1.08             | 9.68          | 1.94            | 8.70             | 4.89           | 89.63             | 12.74           | 35.57           | 45.93            | 86.89          | 98.28           |
| 30               | 408.29                | 0.76             | 12.28         | 1.46            | 7.84             | 6.76           | 100.13            | 11.57           | 31.47           | 42.57            | 97.97          | 106.82          |
| 33               | 270.19                | 0.56             | 5.93          | 1.74            | 6.38             | 4.61           | 67.22             | 7.70            | 29.13           | 36.30            | 64.88          | 74.34           |
| 36               | 199.03                | 0.40             | 3.33          | 2.69            | 4.70             | 3.75           | 47.95             | 5.02            | 23.73           | 27.99            | 46.47          | 54.25           |
| 39               | 169.24                | 0.31             | 4.11          | 1.13            | 3.28             | 5.38           | 39.16             | 3.75            | 17.19           | 20.43            | 38.51          | 43.60           |
| 42               | 183.12                | 0.31             | 2.12          | 1.39            | 3.04             | 4.10           | 47.56             | 3.36            | 17.14           | 20.64            | 46.62          | 50.99           |
| 45               | 210.34                | 0.36             | 3.71          | 2.12            | 3.43             | 12.06          | 44.24             | 4.84            | 14.00           | 20.65            | 43.88          | 48.50           |
| 48               | 209.65                | 0.20             | 2.10          | 1.21            | 1.77             | 6.52           | 51.04             | 1.89            | 7.94            | 13.81            | 50.33          | 52.19           |
| 52               | 202.92                | 0.24             | 2.92          | 2.29            | 3.17             | 12.13          | 43.11             | 2.80            | 10.95           | 16.23            | 43.52          | 46.45           |
| 56               | 145.72                | 0.35             | 5.97          | 3.27            | 3.69             | 10.27          | 48.49             | 3.31            | 11.24           | 20.73            | 47.17          | 51.52           |
| 60               | 122.34                | 0.16             | 1.68          | 1.27            | 2.32             | 4.46           | 33.09             | 2.08            | 9.08            | 13.91            | 31.90          | 34.81           |
| 64               | 86.68                 | 0.24             | 1.54          | 1.37            | 2.00             | 4.54           | 28.34             | 1.93            | 8.32            | 12.61            | 27.31          | 30.08           |
| 68               | 56.64                 | 0.22             | 1.61          | 1.35            | 4.89             | 5.36           | 22.72             | 1.81            | 21.58           | 24.50            | 21.02          | 32.28           |

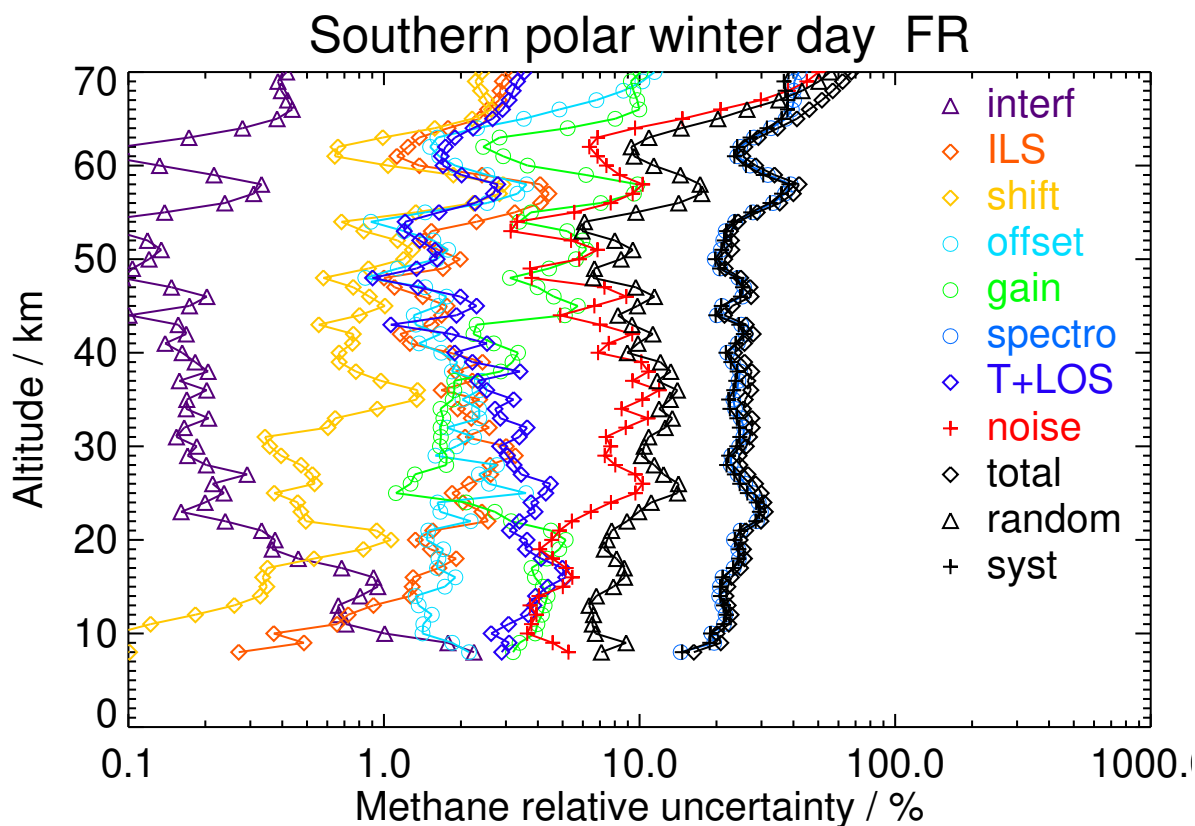

**Figure S27.** V8H\_CH4\_61 Southern polar winter day

**Table S28.** Methane error budget for Southern polar winter night. All uncertainties are  $1\sigma$ .

| altitude<br>(km) | mean target<br>(ppbv) | interf<br>(ppbv) | ILS<br>(ppbv) | shift<br>(ppbv) | offset<br>(ppbv) | gain<br>(ppbv) | spectro<br>(ppbv) | T+LOS<br>(ppbv) | noise<br>(ppbv) | random<br>(ppbv) | syst<br>(ppbv) | total<br>(ppbv) |
|------------------|-----------------------|------------------|---------------|-----------------|------------------|----------------|-------------------|-----------------|-----------------|------------------|----------------|-----------------|
| 9                | 1690.76               | 27.07            | 5.47          | 1.12            | 28.33            | 56.94          | 222.13            | 39.30           | 71.68           | 110.27           | 220.62         | 246.64          |
| 12               | 1722.99               | 9.80             | 20.73         | 2.26            | 20.49            | 57.42          | 310.91            | 47.30           | 53.24           | 94.20            | 311.62         | 325.55          |
| 15               | 1442.18               | 12.34            | 30.14         | 3.97            | 21.79            | 53.33          | 233.88            | 54.43           | 62.36           | 107.76           | 233.10         | 256.80          |
| 18               | 1163.56               | 4.53             | 23.28         | 4.36            | 16.62            | 41.48          | 237.68            | 37.40           | 46.79           | 84.88            | 235.49         | 250.32          |
| 21               | 1011.86               | 2.39             | 14.40         | 8.81            | 15.83            | 44.88          | 208.47            | 28.52           | 46.10           | 70.66            | 209.67         | 221.26          |
| 24               | 724.71                | 0.97             | 14.50         | 4.20            | 11.85            | 22.59          | 188.07            | 23.04           | 44.21           | 68.29            | 184.58         | 196.81          |
| 27               | 415.03                | 0.93             | 7.58          | 2.08            | 9.78             | 7.79           | 108.80            | 16.03           | 38.86           | 59.98            | 101.12         | 117.57          |
| 30               | 347.57                | 0.66             | 10.76         | 1.43            | 7.84             | 4.48           | 88.47             | 11.29           | 32.09           | 46.34            | 83.89          | 95.83           |
| 33               | 314.99                | 0.38             | 5.06          | 1.68            | 6.56             | 5.84           | 77.32             | 9.12            | 29.60           | 38.85            | 74.39          | 83.92           |
| 36               | 230.68                | 0.35             | 5.34          | 2.57            | 4.78             | 6.08           | 61.55             | 6.32            | 24.51           | 31.77            | 59.28          | 67.26           |
| 39               | 197.35                | 0.33             | 4.16          | 1.34            | 3.38             | 7.58           | 50.18             | 4.60            | 19.11           | 24.94            | 48.69          | 54.71           |
| 42               | 168.55                | 0.33             | 2.81          | 1.76            | 3.23             | 5.55           | 43.59             | 3.94            | 18.24           | 23.48            | 41.83          | 47.96           |
| 45               | 177.87                | 0.26             | 2.75          | 1.73            | 3.25             | 10.33          | 39.86             | 4.39            | 13.76           | 18.82            | 39.63          | 43.88           |
| 48               | 179.91                | 0.18             | 2.77          | 1.13            | 1.90             | 5.14           | 44.39             | 1.86            | 9.36            | 14.50            | 43.48          | 45.84           |
| 52               | 154.77                | 0.23             | 3.37          | 1.87            | 3.03             | 9.49           | 36.84             | 2.19            | 11.18           | 15.90            | 36.72          | 40.02           |
| 56               | 138.40                | 0.25             | 4.45          | 2.45            | 2.73             | 7.65           | 36.97             | 2.37            | 9.22            | 17.31            | 35.35          | 39.36           |
| 60               | 108.97                | 0.17             | 1.84          | 1.40            | 2.34             | 5.29           | 29.22             | 1.97            | 8.95            | 15.32            | 27.24          | 31.25           |
| 64               | 78.92                 | 0.20             | 1.23          | 1.17            | 1.83             | 3.17           | 25.45             | 1.96            | 8.16            | 11.83            | 24.39          | 27.11           |
| 68               | 55.22                 | 0.22             | 1.79          | 1.17            | 4.83             | 3.96           | 21.88             | 2.03            | 21.34           | 24.50            | 19.53          | 31.34           |

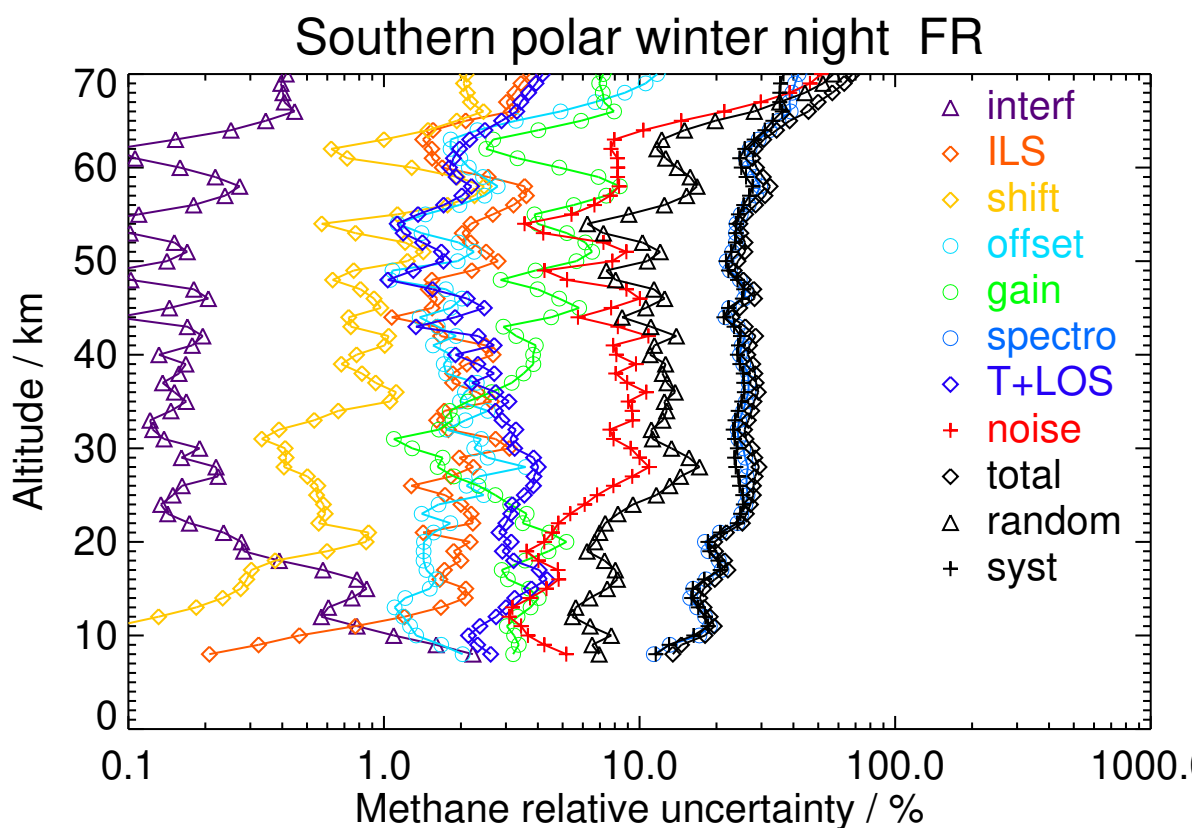

**Figure S28.** V8H\_CH4\_61 Southern polar winter night

**Table S29.** Methane error budget for Southern polar spring day. All uncertainties are  $1\sigma$ .

| altitude<br>(km) | mean target<br>(ppbv) | interf<br>(ppbv) | ILS<br>(ppbv) | shift<br>(ppbv) | offset<br>(ppbv) | gain<br>(ppbv) | spectro<br>(ppbv) | T+LOS<br>(ppbv) | noise<br>(ppbv) | random<br>(ppbv) | syst<br>(ppbv) | total<br>(ppbv) |
|------------------|-----------------------|------------------|---------------|-----------------|------------------|----------------|-------------------|-----------------|-----------------|------------------|----------------|-----------------|
| 9                | 1797.35               | 15.47            | 13.56         | 3.74            | 29.04            | 59.33          | 368.60            | 59.81           | 79.01           | 146.21           | 359.32         | 387.93          |
| 12               | 1816.55               | 14.84            | 83.35         | 6.86            | 22.11            | 75.34          | 305.56            | 69.67           | 65.62           | 111.98           | 321.51         | 340.46          |
| 15               | 1319.71               | 9.34             | 34.97         | 8.54            | 19.38            | 31.00          | 280.88            | 61.84           | 67.74           | 115.20           | 277.05         | 300.04          |
| 18               | 922.35                | 3.81             | 27.91         | 4.45            | 9.95             | 17.37          | 208.57            | 53.51           | 45.38           | 82.67            | 206.89         | 222.80          |
| 21               | 413.52                | 0.83             | 21.58         | 3.83            | 7.33             | 6.76           | 119.87            | 24.64           | 35.63           | 59.02            | 115.51         | 129.72          |
| 24               | 374.05                | 1.19             | 14.25         | 2.67            | 3.91             | 13.50          | 100.09            | 13.34           | 31.54           | 56.38            | 91.77          | 107.70          |
| 27               | 351.28                | 3.40             | 13.36         | 3.99            | 4.11             | 7.88           | 125.46            | 11.07           | 29.34           | 94.13            | 90.27          | 130.42          |
| 30               | 544.34                | 2.44             | 35.48         | 4.94            | 5.32             | 37.59          | 142.32            | 14.75           | 29.89           | 104.91           | 114.41         | 155.23          |
| 33               | 542.55                | 1.17             | 10.45         | 3.22            | 5.23             | 12.77          | 127.38            | 10.29           | 24.93           | 64.71            | 114.35         | 131.39          |
| 36               | 454.47                | 0.88             | 14.40         | 3.94            | 5.41             | 20.86          | 99.47             | 7.74            | 21.38           | 43.03            | 96.17          | 105.36          |
| 39               | 443.37                | 0.63             | 14.08         | 3.44            | 4.49             | 21.72          | 92.61             | 6.00            | 17.03           | 37.67            | 90.48          | 98.01           |
| 42               | 406.44                | 0.44             | 17.83         | 3.76            | 4.04             | 24.76          | 93.64             | 5.57            | 13.61           | 37.88            | 92.26          | 99.73           |
| 45               | 404.85                | 0.62             | 30.68         | 4.81            | 7.20             | 52.72          | 91.44             | 7.75            | 10.62           | 55.37            | 96.25          | 111.04          |
| 48               | 371.81                | 0.93             | 31.47         | 3.12            | 6.56             | 50.61          | 106.14            | 7.50            | 14.66           | 61.44            | 106.62         | 123.05          |
| 52               | 298.76                | 0.35             | 11.89         | 2.74            | 4.20             | 26.32          | 71.88             | 5.54            | 12.63           | 40.81            | 67.46          | 78.85           |
| 56               | 251.46                | 0.31             | 8.85          | 3.88            | 1.70             | 7.86           | 64.30             | 4.43            | 8.66            | 17.98            | 63.75          | 66.24           |
| 60               | 209.28                | 0.24             | 5.28          | 3.87            | 3.36             | 10.37          | 56.58             | 3.82            | 9.75            | 17.27            | 56.35          | 58.93           |
| 64               | 185.56                | 0.22             | 2.18          | 2.33            | 1.74             | 5.81           | 50.73             | 2.91            | 5.73            | 12.47            | 50.07          | 51.60           |
| 68               | 168.14                | 0.19             | 3.05          | 1.57            | 4.32             | 5.99           | 52.61             | 3.46            | 17.86           | 24.15            | 50.81          | 56.26           |

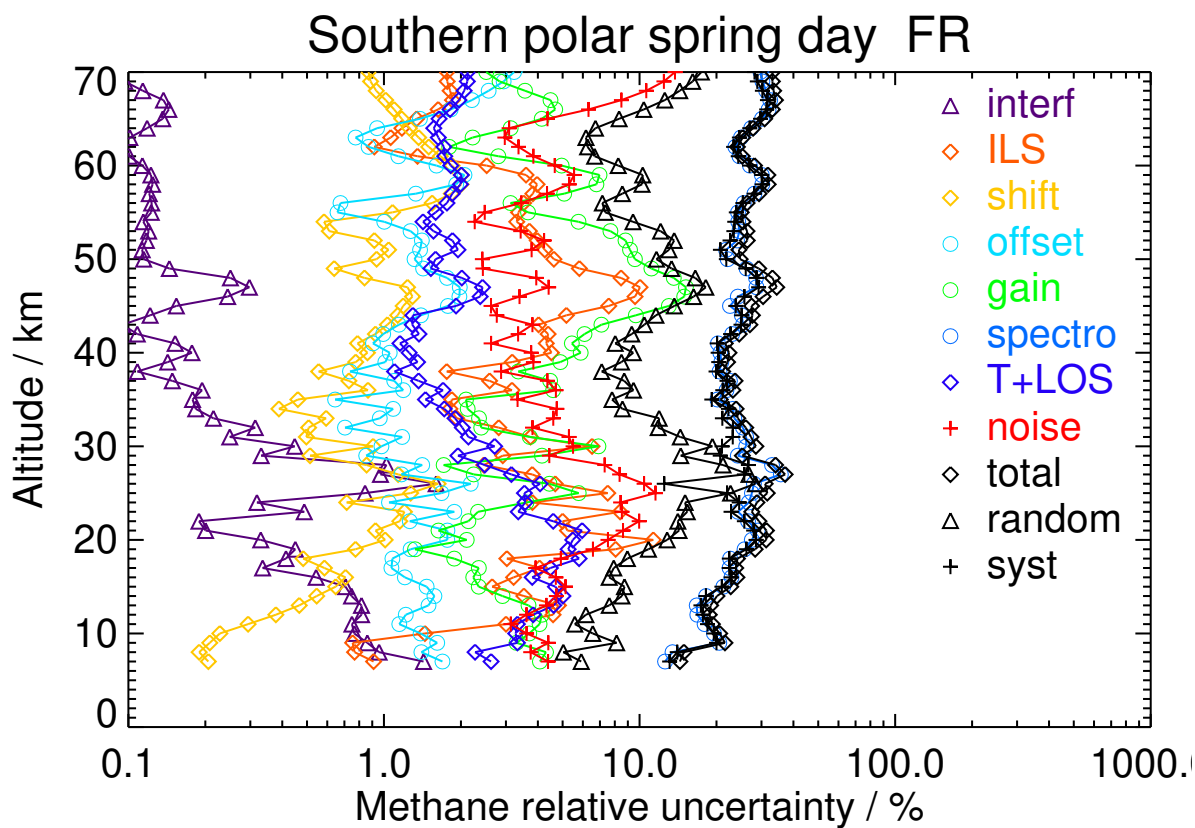

**Figure S29.** V8H\_CH4\_61 Southern polar spring day

**Table S30.** Methane error budget for Southern polar spring night. All uncertainties are  $1\sigma$ .

| altitude<br>(km) | mean target<br>(ppbv) | interf<br>(ppbv) | ILS<br>(ppbv) | shift<br>(ppbv) | offset<br>(ppbv) | gain<br>(ppbv) | spectro<br>(ppbv) | T+LOS<br>(ppbv) | noise<br>(ppbv) | random<br>(ppbv) | syst<br>(ppbv) | total<br>(ppbv) |
|------------------|-----------------------|------------------|---------------|-----------------|------------------|----------------|-------------------|-----------------|-----------------|------------------|----------------|-----------------|
| 9                | 1761.25               | 11.06            | 13.96         | 2.22            | 27.95            | 51.32          | 402.46            | 56.19           | 75.58           | 129.06           | 397.40         | 417.83          |
| 12               | 1787.98               | 8.98             | 83.24         | 7.60            | 18.55            | 79.85          | 300.54            | 55.37           | 57.31           | 126.16           | 307.48         | 332.35          |
| 15               | 1289.57               | 6.26             | 50.92         | 7.69            | 18.15            | 51.08          | 298.53            | 54.42           | 61.14           | 125.82           | 292.60         | 318.51          |
| 18               | 1032.05               | 3.85             | 40.18         | 7.26            | 12.23            | 43.20          | 217.62            | 57.44           | 49.19           | 108.15           | 212.32         | 238.28          |
| 21               | 771.05                | 1.49             | 55.78         | 8.18            | 9.68             | 24.22          | 193.04            | 32.52           | 43.02           | 94.69            | 187.27         | 209.85          |
| 24               | 677.11                | 1.05             | 50.21         | 9.23            | 7.26             | 50.51          | 210.74            | 20.70           | 38.36           | 151.45           | 169.07         | 226.98          |
| 27               | 624.46                | 3.86             | 29.99         | 6.78            | 6.81             | 29.32          | 203.82            | 17.22           | 36.36           | 133.46           | 164.97         | 212.19          |
| 30               | 602.15                | 1.62             | 30.18         | 4.50            | 6.67             | 25.33          | 179.51            | 17.09           | 31.81           | 113.74           | 149.04         | 187.48          |
| 33               | 551.20                | 1.54             | 19.06         | 3.69            | 6.63             | 14.50          | 144.56            | 13.57           | 28.45           | 76.01            | 129.41         | 150.08          |
| 36               | 446.51                | 0.81             | 10.08         | 2.76            | 5.54             | 18.11          | 110.81            | 8.46            | 23.15           | 49.30            | 104.52         | 115.57          |
| 39               | 414.26                | 0.66             | 16.62         | 2.95            | 5.05             | 25.69          | 102.32            | 6.68            | 18.87           | 44.74            | 99.19          | 108.82          |
| 42               | 392.04                | 0.59             | 14.75         | 3.12            | 5.09             | 26.49          | 99.22             | 6.60            | 16.50           | 40.94            | 97.15          | 105.43          |
| 45               | 362.45                | 0.40             | 11.08         | 2.00            | 4.47             | 27.30          | 78.08             | 5.50            | 11.74           | 34.27            | 77.34          | 84.59           |
| 48               | 328.12                | 0.55             | 10.76         | 2.10            | 4.59             | 25.85          | 82.37             | 4.30            | 12.28           | 39.23            | 78.90          | 88.11           |
| 52               | 301.50                | 0.31             | 6.19          | 2.41            | 3.55             | 15.27          | 69.14             | 4.43            | 12.78           | 26.38            | 67.51          | 72.48           |
| 56               | 239.49                | 0.32             | 7.51          | 4.37            | 2.85             | 11.73          | 59.15             | 4.50            | 9.61            | 18.92            | 58.94          | 61.90           |
| 60               | 186.56                | 0.27             | 3.58          | 3.71            | 3.75             | 10.93          | 47.85             | 3.74            | 9.96            | 16.85            | 47.74          | 50.63           |
| 64               | 143.46                | 0.25             | 2.48          | 2.29            | 2.20             | 7.14           | 40.86             | 3.09            | 6.84            | 14.82            | 39.67          | 42.35           |
| 68               | 98.53                 | 0.23             | 2.71          | 1.96            | 4.77             | 9.88           | 35.77             | 3.41            | 18.53           | 24.11            | 34.42          | 42.02           |

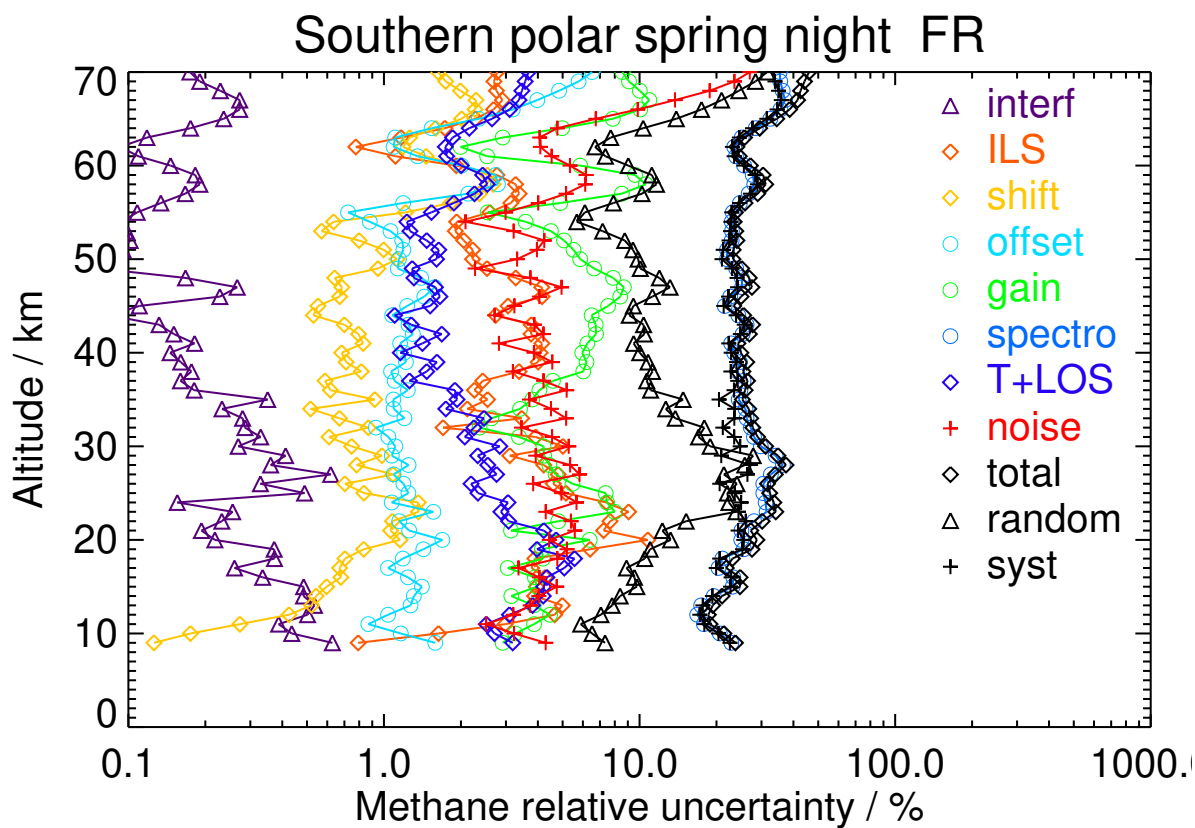

**Figure S30.** V8H\_CH4\_61 Southern polar spring night

**Table S31.** Methane error budget for Southern polar summer day. All uncertainties are  $1\sigma$ .

| altitude<br>(km) | mean target<br>(ppbv) | interf<br>(ppbv) | ILS<br>(ppbv) | shift<br>(ppbv) | offset<br>(ppbv) | gain<br>(ppbv) | spectro<br>(ppbv) | T+LOS<br>(ppbv) | noise<br>(ppbv) | random<br>(ppbv) | syst<br>(ppbv) | total<br>(ppbv) |
|------------------|-----------------------|------------------|---------------|-----------------|------------------|----------------|-------------------|-----------------|-----------------|------------------|----------------|-----------------|
| 9                | 1631.40               | 21.95            | 10.77         | 1.24            | 22.55            | 81.93          | 301.04            | 38.53           | 76.61           | 164.56           | 280.56         | 325.26          |
| 12               | 1684.67               | 3.49             | 23.43         | 1.59            | 10.36            | 65.71          | 342.44            | 24.17           | 37.39           | 69.39            | 345.58         | 352.47          |
| 15               | 1525.00               | 6.53             | 58.70         | 3.17            | 13.22            | 84.93          | 336.56            | 40.04           | 44.01           | 131.35           | 332.33         | 357.35          |
| 18               | 1296.62               | 2.26             | 56.00         | 3.03            | 11.58            | 60.30          | 304.41            | 43.27           | 41.36           | 105.93           | 303.22         | 321.20          |
| 21               | 1155.77               | 2.05             | 41.26         | 3.62            | 9.07             | 39.25          | 297.26            | 30.97           | 42.14           | 83.02            | 295.89         | 307.32          |
| 24               | 1133.25               | 1.08             | 60.37         | 11.73           | 7.84             | 32.91          | 296.29            | 27.15           | 41.92           | 76.59            | 298.90         | 308.56          |
| 27               | 960.46                | 0.90             | 54.76         | 5.73            | 8.32             | 35.02          | 258.00            | 22.77           | 40.62           | 60.56            | 263.43         | 270.30          |
| 30               | 919.20                | 2.33             | 32.54         | 3.84            | 6.17             | 14.62          | 228.00            | 20.78           | 37.61           | 54.05            | 228.56         | 234.86          |
| 33               | 792.61                | 1.18             | 35.46         | 3.62            | 5.36             | 22.11          | 165.59            | 14.35           | 30.99           | 39.75            | 169.70         | 174.29          |
| 36               | 671.23                | 0.84             | 10.39         | 1.99            | 5.01             | 14.24          | 145.69            | 9.85            | 25.27           | 37.05            | 144.66         | 149.33          |
| 39               | 508.13                | 0.79             | 15.76         | 2.91            | 4.70             | 18.59          | 117.04            | 7.74            | 22.73           | 29.73            | 118.39         | 122.06          |
| 42               | 350.56                | 0.41             | 7.13          | 3.13            | 3.20             | 7.54           | 94.69             | 6.67            | 21.20           | 27.10            | 94.09          | 97.92           |
| 45               | 289.65                | 0.42             | 22.76         | 4.72            | 4.70             | 29.79          | 49.51             | 5.74            | 14.73           | 24.42            | 59.62          | 64.43           |
| 48               | 180.80                | 0.31             | 5.53          | 0.94            | 2.46             | 11.65          | 66.58             | 2.86            | 12.93           | 23.09            | 65.18          | 69.15           |
| 52               | 152.56                | 0.40             | 4.00          | 1.97            | 3.40             | 14.20          | 39.99             | 3.21            | 18.30           | 24.65            | 39.63          | 46.67           |
| 56               | 72.81                 | 0.30             | 5.19          | 1.63            | 2.33             | 8.21           | 22.29             | 2.76            | 12.54           | 16.19            | 22.41          | 27.64           |
| 60               | 95.41                 | 0.23             | 3.25          | 1.33            | 1.46             | 3.31           | 21.18             | 1.43            | 6.73            | 10.97            | 20.03          | 22.83           |
| 64               | 111.57                | 0.31             | 1.03          | 2.78            | 1.80             | 7.01           | 38.66             | 1.65            | 5.89            | 10.27            | 38.57          | 39.92           |
| 68               | 150.32                | 0.25             | 1.48          | 2.76            | 2.76             | 6.17           | 42.93             | 2.38            | 11.01           | 13.90            | 42.81          | 45.01           |

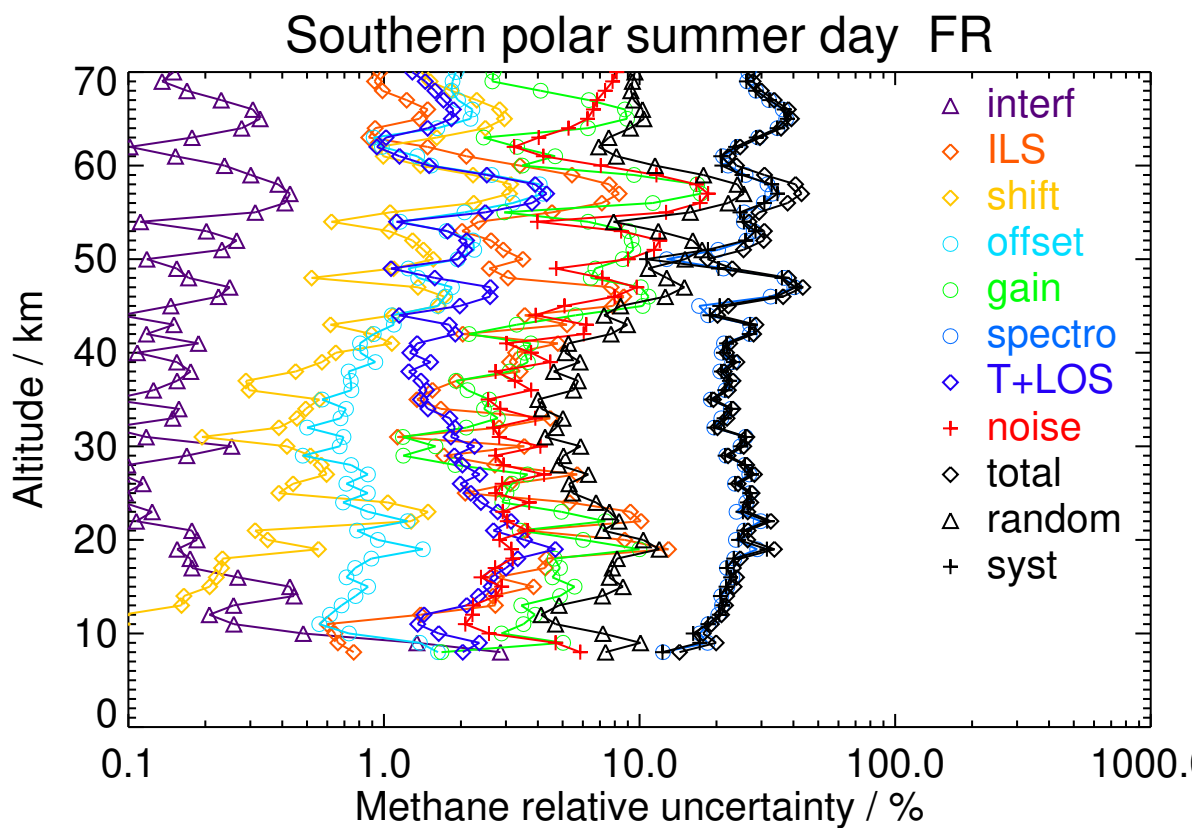

**Figure S31.** V8H\_CH4\_61 Southern polar summer day

**Table S32.** Methane error budget for Southern polar summer night. All uncertainties are  $1\sigma$ .

| altitude<br>(km) | mean target<br>(ppbv) | interf<br>(ppbv) | ILS<br>(ppbv) | shift<br>(ppbv) | offset<br>(ppbv) | gain<br>(ppbv) | spectro<br>(ppbv) | T+LOS<br>(ppbv) | noise<br>(ppbv) | random<br>(ppbv) | syst<br>(ppbv) | total<br>(ppbv) |
|------------------|-----------------------|------------------|---------------|-----------------|------------------|----------------|-------------------|-----------------|-----------------|------------------|----------------|-----------------|
| 9                | 1666.27               | 22.59            | 8.90          | 1.29            | 20.38            | 80.01          | 268.42            | 38.13           | 69.31           | 170.90           | 237.72         | 292.77          |
| 12               | 1708.85               | 2.45             | 14.84         | 1.14            | 9.99             | 56.37          | 355.86            | 25.30           | 30.13           | 65.97            | 356.84         | 362.89          |
| 15               | 1765.85               | 5.56             | 85.59         | 5.45            | 16.27            | 138.26         | 323.13            | 42.96           | 42.14           | 108.89           | 350.64         | 367.16          |
| 18               | 1499.96               | 1.57             | 44.84         | 3.94            | 11.66            | 95.67          | 336.29            | 34.44           | 33.18           | 93.24            | 343.51         | 355.94          |
| 21               | 1253.06               | 0.86             | 53.79         | 12.14           | 14.05            | 100.85         | 327.41            | 30.70           | 33.18           | 113.97           | 331.15         | 350.21          |
| 24               | 1122.03               | 0.86             | 34.95         | 4.09            | 10.35            | 49.79          | 293.86            | 22.31           | 31.71           | 74.97            | 293.36         | 302.79          |
| 27               | 957.08                | 1.47             | 21.96         | 3.56            | 8.77             | 21.64          | 227.60            | 18.49           | 30.59           | 48.03            | 227.63         | 232.64          |
| 30               | 865.14                | 0.87             | 9.04          | 1.91            | 7.06             | 7.42           | 225.51            | 15.57           | 27.91           | 39.83            | 224.68         | 228.18          |
| 33               | 741.63                | 1.17             | 19.14         | 3.33            | 6.54             | 22.23          | 163.67            | 12.26           | 24.91           | 35.06            | 165.06         | 168.75          |
| 36               | 566.23                | 0.64             | 8.38          | 1.36            | 5.33             | 13.30          | 126.15            | 8.78            | 22.54           | 28.18            | 126.42         | 129.53          |
| 39               | 388.96                | 0.53             | 12.20         | 2.69            | 4.58             | 15.46          | 84.09             | 5.85            | 20.92           | 25.28            | 85.56          | 89.22           |
| 42               | 221.33                | 0.42             | 9.07          | 1.71            | 3.65             | 6.67           | 69.66             | 5.02            | 21.37           | 25.68            | 69.41          | 74.01           |
| 45               | 189.45                | 0.51             | 16.70         | 1.92            | 4.38             | 23.20          | 46.36             | 5.35            | 18.93           | 25.20            | 52.36          | 58.10           |
| 48               | 109.42                | 0.22             | 2.13          | 1.00            | 1.16             | 4.44           | 31.60             | 1.15            | 6.13            | 11.59            | 30.49          | 32.62           |
| 52               | 82.32                 | 0.19             | 1.16          | 1.30            | 2.12             | 7.56           | 21.03             | 1.50            | 9.21            | 13.70            | 20.16          | 24.37           |
| 56               | 106.99                | 0.24             | 4.45          | 1.75            | 2.11             | 6.20           | 28.92             | 1.72            | 9.39            | 14.30            | 28.09          | 31.52           |
| 60               | 171.33                | 0.14             | 2.91          | 1.82            | 1.47             | 4.16           | 41.29             | 2.24            | 6.15            | 14.68            | 39.55          | 42.18           |
| 64               | 172.82                | 0.44             | 1.68          | 2.73            | 2.54             | 7.75           | 49.88             | 2.49            | 7.53            | 12.84            | 49.63          | 51.26           |
| 68               | 159.29                | 0.27             | 1.43          | 1.74            | 3.44             | 4.71           | 43.60             | 3.54            | 15.11           | 17.07            | 43.47          | 46.70           |

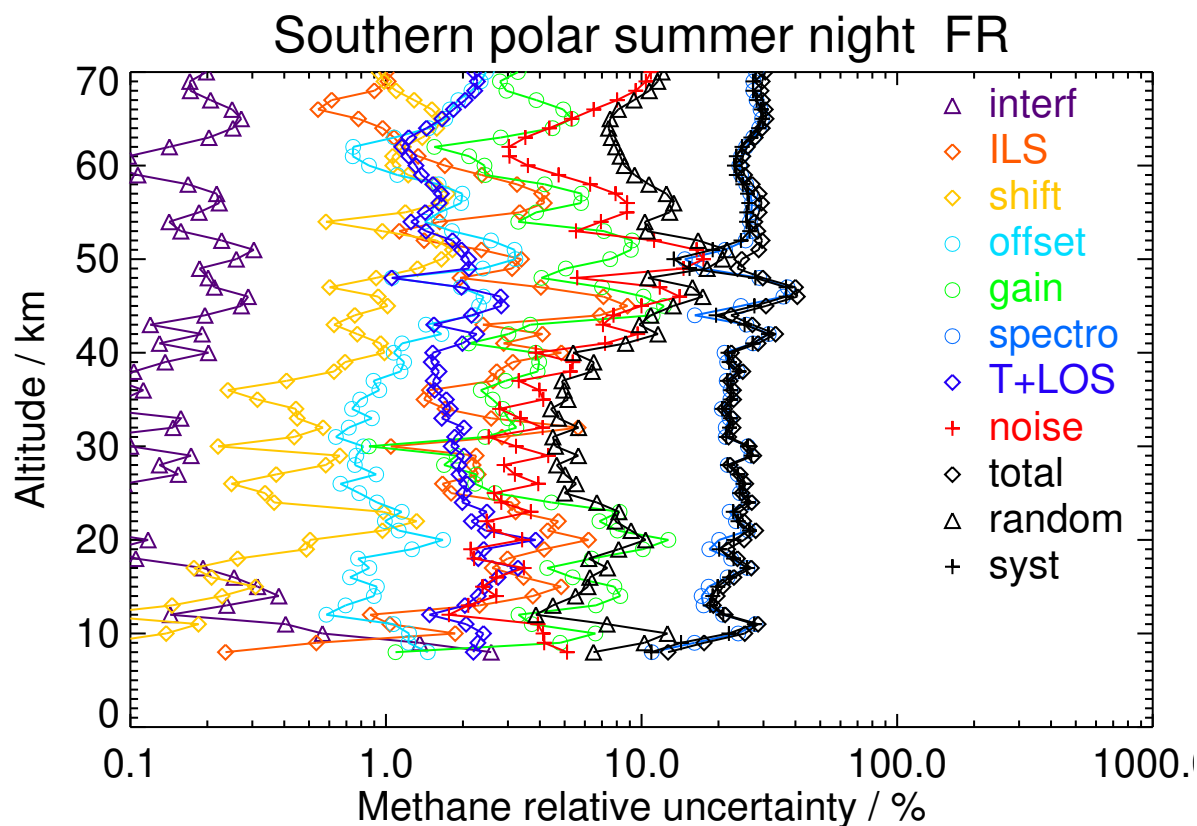

**Figure S32.** V8H\_CH4\_61 Southern polar summer night



**Table S33.** Methane error budget for Southern polar autumn day. All uncertainties are  $1\sigma$ .

| altitude<br>(km) | mean target<br>(ppbv) | interf<br>(ppbv) | ILS<br>(ppbv) | shift<br>(ppbv) | offset<br>(ppbv) | gain<br>(ppbv) | spectro<br>(ppbv) | T+LOS<br>(ppbv) | noise<br>(ppbv) | random<br>(ppbv) | syst<br>(ppbv) | total<br>(ppbv) |
|------------------|-----------------------|------------------|---------------|-----------------|------------------|----------------|-------------------|-----------------|-----------------|------------------|----------------|-----------------|
| 9                | 1692.53               | 63.20            | 1.74          | 2.91            | 27.70            | 63.24          | 473.24            | 48.93           | 101.72          | 133.81           | 477.04         | 495.45          |
| 12               | 1754.13               | 4.44             | 17.17         | 1.92            | 10.38            | 88.19          | 323.61            | 30.75           | 35.37           | 60.37            | 333.89         | 339.30          |
| 15               | 1551.81               | 11.12            | 36.20         | 3.91            | 12.45            | 43.42          | 326.90            | 43.48           | 45.23           | 78.97            | 328.72         | 338.07          |
| 18               | 1375.14               | 3.14             | 25.26         | 5.47            | 13.21            | 100.18         | 272.31            | 32.26           | 37.02           | 64.31            | 288.65         | 295.73          |
| 21               | 1209.83               | 2.34             | 21.43         | 13.51           | 16.04            | 95.88          | 278.79            | 24.68           | 33.24           | 58.64            | 293.42         | 299.22          |
| 24               | 1038.03               | 1.66             | 21.52         | 5.09            | 13.71            | 58.61          | 245.34            | 21.51           | 32.33           | 53.42            | 250.92         | 256.54          |
| 27               | 807.87                | 1.27             | 8.18          | 1.88            | 10.38            | 18.62          | 190.45            | 18.58           | 31.10           | 46.21            | 189.67         | 195.22          |
| 30               | 666.81                | 0.51             | 5.27          | 2.54            | 7.89             | 12.14          | 166.35            | 17.65           | 25.18           | 39.71            | 165.18         | 169.88          |
| 33               | 428.21                | 0.46             | 9.71          | 1.88            | 6.24             | 11.79          | 111.89            | 11.35           | 21.64           | 34.80            | 110.37         | 115.73          |
| 36               | 224.36                | 0.30             | 4.99          | 1.77            | 4.23             | 9.39           | 61.01             | 5.74            | 17.40           | 29.57            | 57.60          | 64.75           |
| 39               | 123.40                | 0.26             | 5.49          | 1.52            | 2.96             | 6.30           | 31.72             | 3.21            | 13.23           | 19.65            | 29.77          | 35.67           |
| 42               | 88.25                 | 0.23             | 3.09          | 0.73            | 2.28             | 3.58           | 22.77             | 1.64            | 11.06           | 14.14            | 21.71          | 25.91           |
| 45               | 109.63                | 0.39             | 4.59          | 1.08            | 2.93             | 5.96           | 27.58             | 2.58            | 15.41           | 18.83            | 26.77          | 32.73           |
| 48               | 163.88                | 0.14             | 1.31          | 1.57            | 2.24             | 7.20           | 36.12             | 3.09            | 7.99            | 12.58            | 35.79          | 37.94           |
| 52               | 221.36                | 0.15             | 5.06          | 0.75            | 2.38             | 7.71           | 51.49             | 2.42            | 6.12            | 10.43            | 51.73          | 52.78           |
| 56               | 209.78                | 0.25             | 5.24          | 2.17            | 4.18             | 11.56          | 46.64             | 3.11            | 10.19           | 17.75            | 46.44          | 49.72           |
| 60               | 167.32                | 0.07             | 1.65          | 0.81            | 1.45             | 4.56           | 42.42             | 2.67            | 6.47            | 12.32            | 41.51          | 43.30           |
| 64               | 91.92                 | 0.24             | 1.36          | 1.65            | 2.63             | 4.17           | 32.70             | 2.49            | 9.58            | 15.73            | 30.81          | 34.59           |
| 68               | 44.72                 | 0.10             | 0.52          | 0.50            | 3.80             | 1.18           | 16.79             | 1.53            | 16.84           | 19.26            | 14.60          | 24.17           |

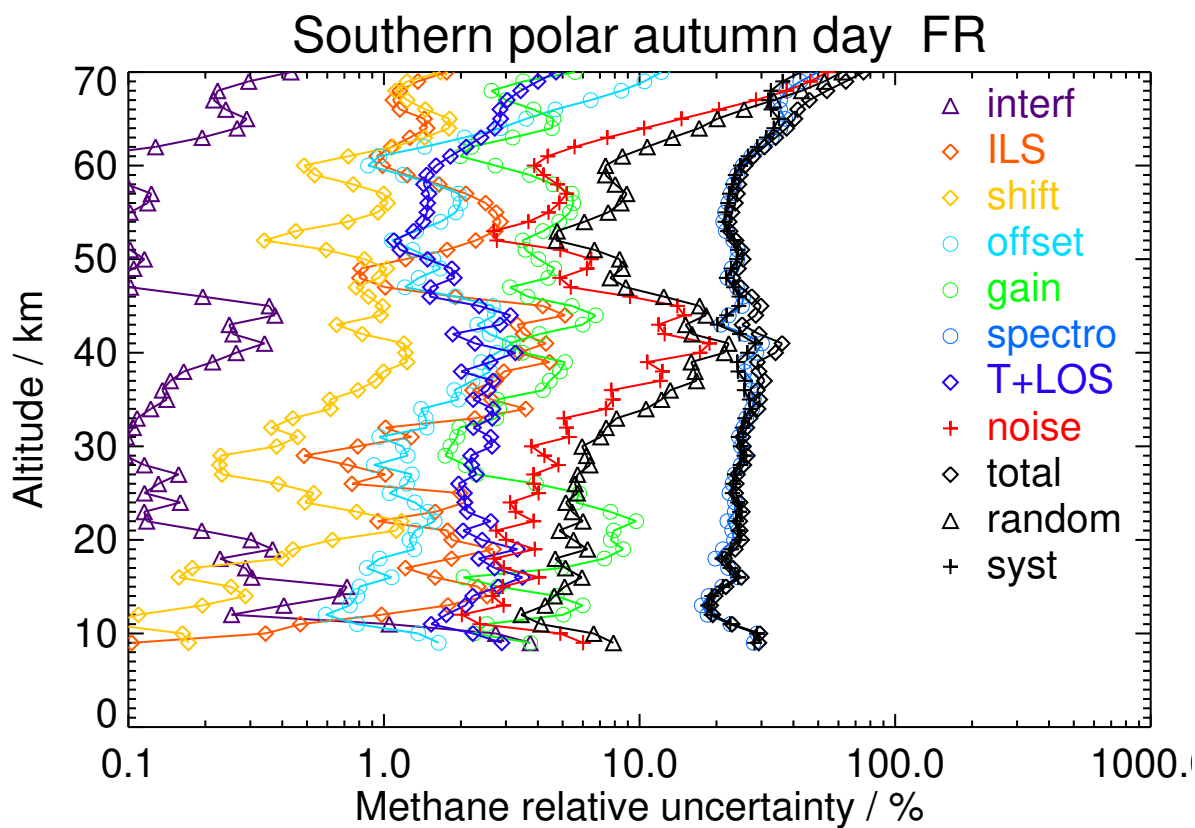

**Figure S33.** V8H\_CH4\_61 Southern polar autumn day



**Table S34.** Methane error budget for Southern polar autumn night. All uncertainties are  $1\sigma$ .

| altitude<br>(km) | mean target<br>(ppbv) | interf<br>(ppbv) | ILS<br>(ppbv) | shift<br>(ppbv) | offset<br>(ppbv) | gain<br>(ppbv) | spectro<br>(ppbv) | T+LOS<br>(ppbv) | noise<br>(ppbv) | random<br>(ppbv) | syst<br>(ppbv) | total<br>(ppbv) |
|------------------|-----------------------|------------------|---------------|-----------------|------------------|----------------|-------------------|-----------------|-----------------|------------------|----------------|-----------------|
| 9                | 1706.65               | 31.30            | 1.76          | 1.79            | 23.34            | 52.79          | 292.35            | 35.58           | 71.94           | 164.17           | 263.20         | 310.20          |
| 12               | 1751.21               | 8.09             | 13.75         | 2.08            | 11.08            | 69.08          | 338.47            | 29.15           | 33.49           | 69.79            | 341.78         | 348.83          |
| 15               | 1623.13               | 11.35            | 47.95         | 6.21            | 13.74            | 66.63          | 308.03            | 43.91           | 46.14           | 88.52            | 313.36         | 325.62          |
| 18               | 1407.28               | 3.04             | 44.54         | 4.81            | 14.52            | 99.69          | 256.90            | 32.18           | 36.79           | 74.52            | 273.86         | 283.82          |
| 21               | 1205.42               | 2.13             | 23.44         | 10.36           | 16.68            | 93.70          | 260.21            | 25.86           | 34.38           | 70.68            | 272.55         | 281.56          |
| 24               | 1015.13               | 1.25             | 16.63         | 7.16            | 15.02            | 55.11          | 230.94            | 21.73           | 34.60           | 61.56            | 234.10         | 242.06          |
| 27               | 773.07                | 1.02             | 9.32          | 2.48            | 11.90            | 16.43          | 181.29            | 18.21           | 33.38           | 51.16            | 179.45         | 186.60          |
| 30               | 617.60                | 0.55             | 3.73          | 1.87            | 9.35             | 11.51          | 157.84            | 16.77           | 27.32           | 46.18            | 155.07         | 161.80          |
| 33               | 350.68                | 0.39             | 6.23          | 1.29            | 7.00             | 7.27           | 97.85             | 10.08           | 22.96           | 45.14            | 91.15          | 101.71          |
| 36               | 168.21                | 0.25             | 3.29          | 1.28            | 4.75             | 5.44           | 47.21             | 4.88            | 19.29           | 32.39            | 40.50          | 51.86           |
| 39               | 106.11                | 0.22             | 4.12          | 1.14            | 3.20             | 4.79           | 28.33             | 3.11            | 14.74           | 21.25            | 25.08          | 32.88           |
| 42               | 105.16                | 0.22             | 3.28          | 0.88            | 2.59             | 4.04           | 28.00             | 2.05            | 14.27           | 18.25            | 26.33          | 32.04           |
| 45               | 155.76                | 0.31             | 2.32          | 1.12            | 2.85             | 6.45           | 38.40             | 3.74            | 15.08           | 20.08            | 37.01          | 42.10           |
| 48               | 188.60                | 0.13             | 2.02          | 1.30            | 2.30             | 7.70           | 43.61             | 3.14            | 7.80            | 12.06            | 43.56          | 45.20           |
| 52               | 195.28                | 0.19             | 3.68          | 0.97            | 2.34             | 6.63           | 46.87             | 2.21            | 9.41            | 13.94            | 46.47          | 48.52           |
| 56               | 144.66                | 0.15             | 4.24          | 1.24            | 2.73             | 7.28           | 35.25             | 2.32            | 8.85            | 15.37            | 34.21          | 37.50           |
| 60               | 97.77                 | 0.08             | 1.13          | 0.62            | 1.71             | 3.89           | 25.81             | 1.87            | 7.42            | 13.29            | 23.83          | 27.28           |
| 64               | 59.40                 | 0.19             | 1.56          | 1.35            | 2.14             | 3.23           | 21.62             | 2.04            | 8.48            | 13.93            | 19.21          | 23.73           |
| 68               | 26.23                 | 0.10             | 0.77          | 0.60            | 4.02             | 1.54           | 12.46             | 1.23            | 17.75           | 19.94            | 9.69           | 22.16           |

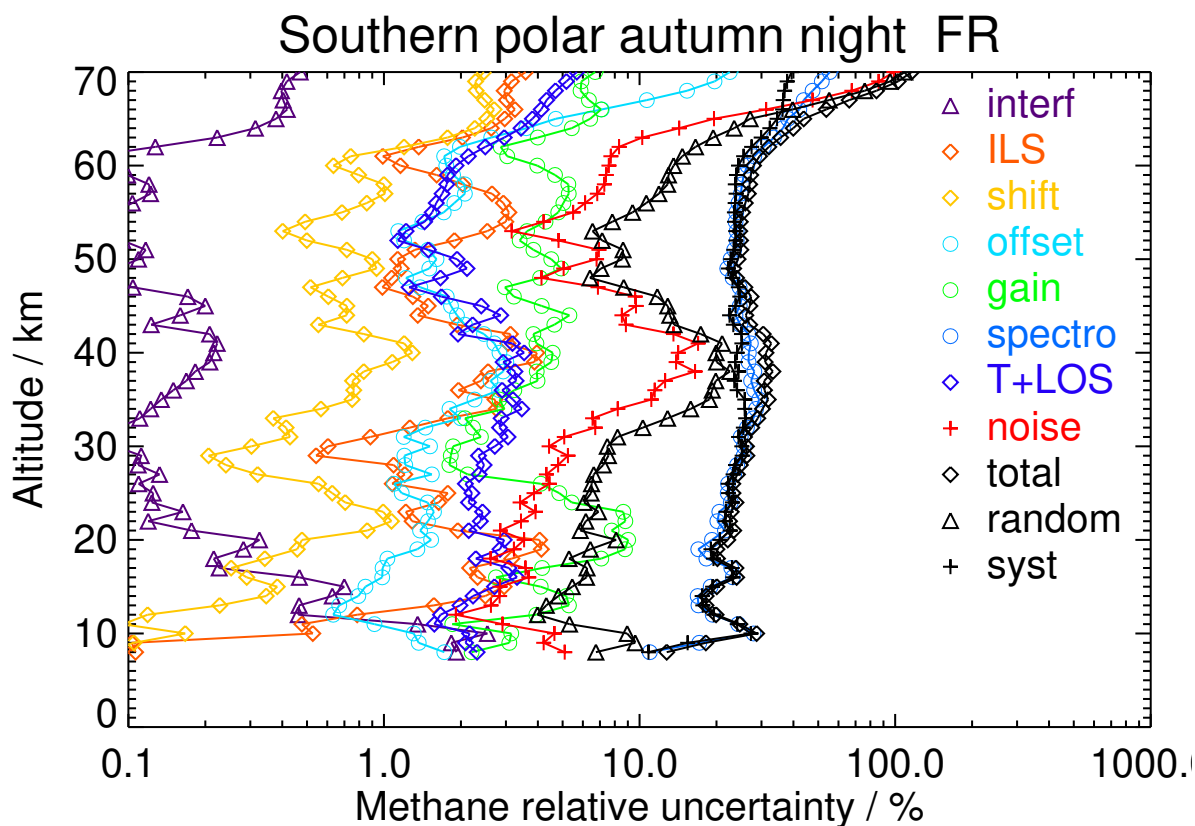

**Figure S34.** V8H\_CH4\_61 Southern polar autumn night

**Table S35.** Methane error budget for Northern polar winter day. All uncertainties are  $1\sigma$ .

| altitude (km) | mean target (ppbv) | interf (ppbv) | ILS (ppbv) | shift (ppbv) | offset (ppbv) | gain (ppbv) | spectro (ppbv) | T+LOS (ppbv) | noise (ppbv) | random (ppbv) | syst (ppbv) | total (ppbv) |
|---------------|--------------------|---------------|------------|--------------|---------------|-------------|----------------|--------------|--------------|---------------|-------------|--------------|
| 12            | 1746.26            | 21.62         | 22.64      | 2.77         | 18.81         | 47.11       | 430.83         | 51.32        | 79.44        | 114.98        | 430.00      | 445.11       |
| 15            | 1481.96            | 19.82         | 25.62      | 3.15         | 10.94         | 33.75       | 320.66         | 33.72        | 40.29        | 75.54         | 319.68      | 328.48       |
| 18            | 1305.88            | 4.77          | 43.53      | 2.61         | 5.50          | 66.42       | 328.15         | 27.91        | 28.89        | 94.43         | 326.72      | 340.09       |
| 21            | 1309.03            | 2.08          | 43.39      | 2.04         | 5.85          | 58.00       | 359.46         | 21.19        | 26.50        | 90.30         | 357.07      | 368.31       |
| 24            | 1214.42            | 1.88          | 32.58      | 1.49         | 5.21          | 33.95       | 281.37         | 17.85        | 26.12        | 63.41         | 279.99      | 287.08       |
| 27            | 1155.32            | 1.44          | 24.49      | 1.66         | 7.76          | 30.66       | 268.84         | 20.94        | 30.92        | 62.53         | 267.15      | 274.37       |
| 30            | 980.98             | 0.94          | 13.80      | 1.66         | 6.12          | 22.69       | 238.07         | 19.64        | 24.29        | 79.12         | 228.35      | 241.66       |
| 33            | 750.91             | 0.81          | 5.51       | 2.17         | 3.52          | 12.33       | 186.63         | 16.06        | 22.96        | 53.72         | 181.47      | 189.25       |
| 36            | 492.62             | 1.04          | 8.39       | 1.90         | 3.12          | 15.10       | 119.60         | 8.40         | 20.07        | 39.46         | 116.34      | 122.85       |
| 39            | 381.19             | 1.13          | 8.35       | 1.17         | 3.17          | 11.80       | 81.59          | 6.24         | 20.31        | 30.57         | 79.97       | 85.61        |
| 42            | 329.13             | 1.03          | 7.63       | 1.18         | 3.20          | 9.92        | 66.68          | 5.56         | 20.55        | 26.86         | 65.93       | 71.19        |
| 45            | 274.68             | 0.71          | 5.13       | 1.23         | 3.34          | 14.40       | 59.50          | 4.88         | 18.65        | 27.01         | 58.56       | 64.49        |
| 48            | 245.02             | 0.81          | 4.48       | 0.77         | 4.71          | 22.34       | 52.92          | 5.96         | 17.40        | 22.67         | 56.29       | 60.68        |
| 52            | 183.22             | 0.26          | 1.39       | 0.43         | 2.48          | 7.02        | 42.83          | 3.98         | 13.06        | 15.89         | 42.73       | 45.59        |
| 56            | 165.29             | 0.23          | 1.12       | 0.42         | 1.64          | 2.99        | 38.94          | 3.90         | 12.85        | 14.63         | 38.67       | 41.35        |
| 60            | 118.11             | 0.17          | 0.60       | 0.24         | 1.65          | 1.74        | 28.91          | 3.15         | 14.70        | 16.40         | 28.27       | 32.68        |
| 64            | 52.86              | 0.27          | 1.50       | 0.21         | 2.98          | 2.05        | 16.86          | 1.82         | 17.24        | 18.85         | 15.64       | 24.50        |
| 68            | 10.66              | 0.33          | 2.16       | 0.27         | 5.40          | 3.61        | 12.41          | 1.06         | 24.69        | 26.43         | 10.63       | 28.49        |

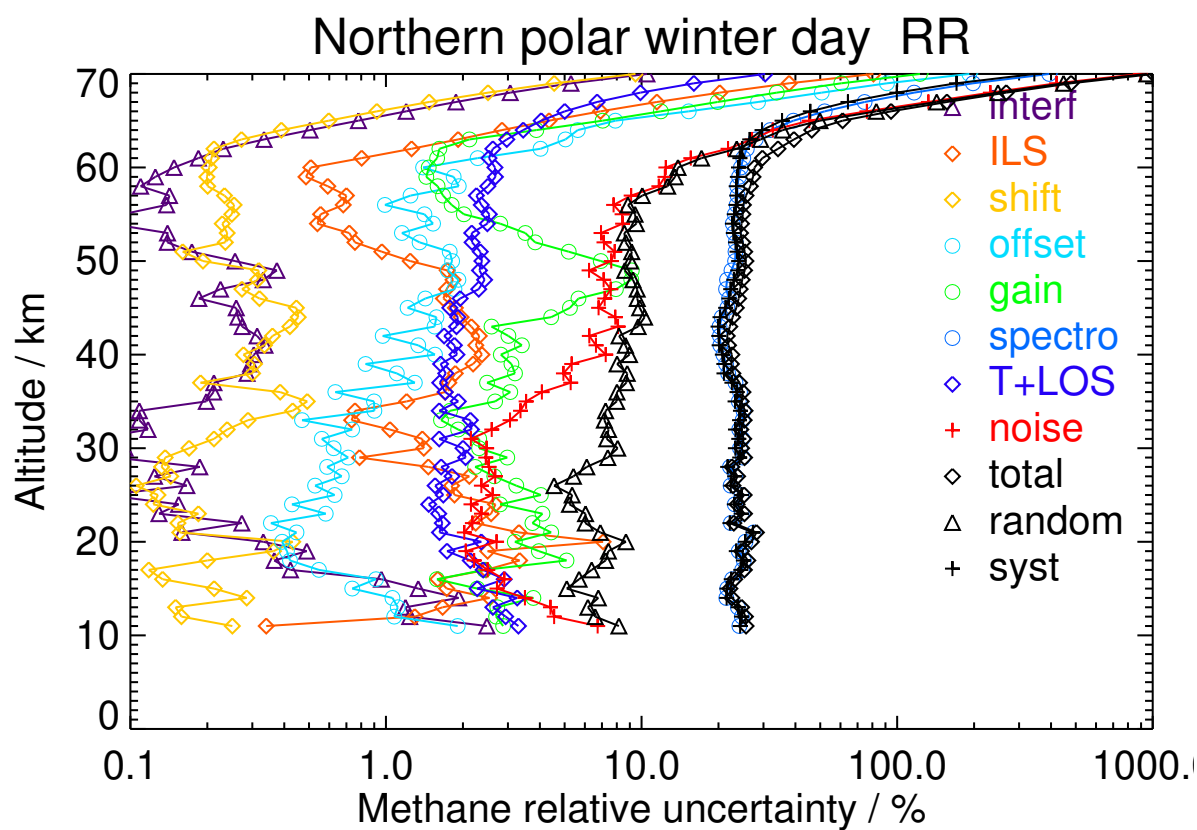

**Figure S35.** V8R\_CH4\_261 Northern polar winter day

**Table S36.** Methane error budget for Northern polar winter night. All uncertainties are  $1\sigma$ .

| altitude<br>(km) | mean target<br>(ppbv) | interf<br>(ppbv) | ILS<br>(ppbv) | shift<br>(ppbv) | offset<br>(ppbv) | gain<br>(ppbv) | spectro<br>(ppbv) | T+LOS<br>(ppbv) | noise<br>(ppbv) | random<br>(ppbv) | syst<br>(ppbv) | total<br>(ppbv) |
|------------------|-----------------------|------------------|---------------|-----------------|------------------|----------------|-------------------|-----------------|-----------------|------------------|----------------|-----------------|
| 9                | 1923.46               | 39.60            | 25.18         | 3.22            | 32.32            | 73.90          | 391.36            | 75.21           | 118.10          | 149.88           | 398.77         | 426.01          |
| 12               | 1792.23               | 22.84            | 34.25         | 2.99            | 18.80            | 51.22          | 403.16            | 50.66           | 81.95           | 109.44           | 405.62         | 420.12          |
| 15               | 1457.38               | 22.83            | 31.20         | 2.50            | 14.15            | 20.09          | 312.26            | 42.46           | 50.96           | 84.35            | 311.28         | 322.51          |
| 18               | 1303.36               | 5.87             | 18.95         | 4.24            | 6.57             | 34.66          | 327.82            | 31.47           | 35.28           | 78.82            | 324.26         | 333.71          |
| 21               | 1057.78               | 1.72             | 42.32         | 2.24            | 7.23             | 44.34          | 314.99            | 23.90           | 33.35           | 115.44           | 302.31         | 323.60          |
| 24               | 928.85                | 2.98             | 26.30         | 2.59            | 4.15             | 28.65          | 206.55            | 14.34           | 22.26           | 104.76           | 184.21         | 211.92          |
| 27               | 939.22                | 1.60             | 16.69         | 2.28            | 7.67             | 18.54          | 249.34            | 18.07           | 30.02           | 111.67           | 227.20         | 253.16          |
| 30               | 889.99                | 4.30             | 20.93         | 4.22            | 6.47             | 34.98          | 174.23            | 14.21           | 20.32           | 80.23            | 162.09         | 180.86          |
| 33               | 668.08                | 2.14             | 10.39         | 3.08            | 4.94             | 25.55          | 156.42            | 11.72           | 23.08           | 57.54            | 150.41         | 161.04          |
| 36               | 413.39                | 2.29             | 13.43         | 2.57            | 4.18             | 17.86          | 100.17            | 5.78            | 20.15           | 46.40            | 94.07          | 104.89          |
| 39               | 346.83                | 1.48             | 11.94         | 1.78            | 3.68             | 18.72          | 75.60             | 4.71            | 17.01           | 31.39            | 74.52          | 80.86           |
| 42               | 351.64                | 1.40             | 14.49         | 2.15            | 3.13             | 15.81          | 73.97             | 4.43            | 14.38           | 26.31            | 74.04          | 78.58           |
| 45               | 341.86                | 1.10             | 10.45         | 2.45            | 2.53             | 10.78          | 72.87             | 4.39            | 13.19           | 24.06            | 71.85          | 75.77           |
| 48               | 279.07                | 0.96             | 5.19          | 1.48            | 2.17             | 4.23           | 59.84             | 4.08            | 13.25           | 22.47            | 57.62          | 61.85           |
| 52               | 194.66                | 0.35             | 2.95          | 0.49            | 1.67             | 3.74           | 43.67             | 3.42            | 10.44           | 15.27            | 42.67          | 45.32           |
| 56               | 160.45                | 0.30             | 3.21          | 0.63            | 1.21             | 2.23           | 36.63             | 3.23            | 9.70            | 12.04            | 36.31          | 38.25           |
| 60               | 141.48                | 0.28             | 1.34          | 0.72            | 1.48             | 1.68           | 33.02             | 3.27            | 12.02           | 13.85            | 32.57          | 35.39           |
| 64               | 97.70                 | 0.40             | 1.66          | 0.70            | 2.58             | 3.62           | 27.11             | 2.97            | 15.90           | 19.23            | 25.50          | 31.94           |
| 68               | 64.50                 | 0.51             | 3.13          | 1.09            | 5.09             | 6.01           | 26.24             | 2.86            | 24.64           | 28.64            | 23.60          | 37.11           |

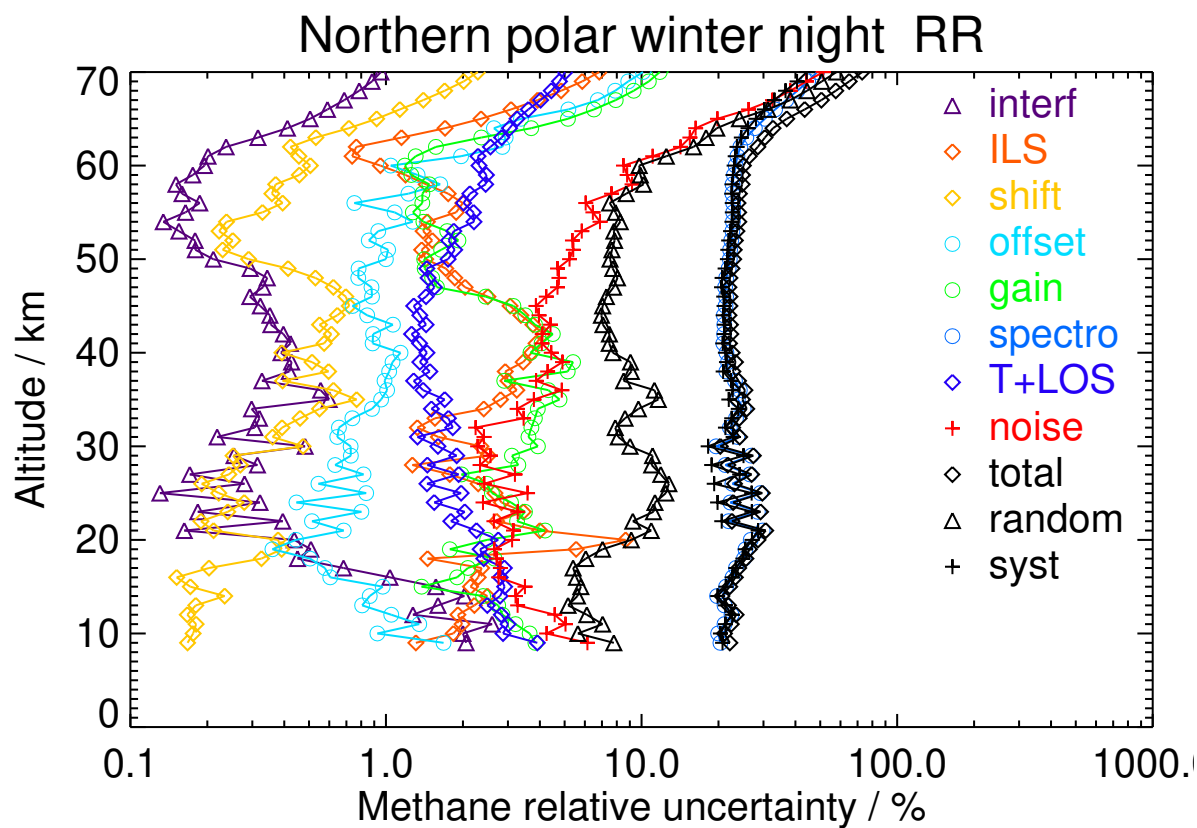

**Figure S36.** V8R\_CH4\_261 Northern polar winter night

**Table S37.** Methane error budget for Northern polar spring day. All uncertainties are  $1\sigma$ .

| altitude<br>(km) | mean target<br>(ppbv) | interf<br>(ppbv) | ILS<br>(ppbv) | shift<br>(ppbv) | offset<br>(ppbv) | gain<br>(ppbv) | spectro<br>(ppbv) | T+LOS<br>(ppbv) | noise<br>(ppbv) | random<br>(ppbv) | syst<br>(ppbv) | total<br>(ppbv) |
|------------------|-----------------------|------------------|---------------|-----------------|------------------|----------------|-------------------|-----------------|-----------------|------------------|----------------|-----------------|
| 12               | 1720.71               | 8.35             | 12.70         | 2.22            | 18.47            | 45.32          | 395.07            | 50.18           | 71.05           | 95.33            | 396.47         | 407.77          |
| 15               | 1507.60               | 5.81             | 24.82         | 2.26            | 12.48            | 47.66          | 292.80            | 44.84           | 47.43           | 77.19            | 295.16         | 305.09          |
| 18               | 1365.51               | 3.13             | 27.92         | 2.53            | 6.61             | 70.20          | 316.46            | 28.71           | 33.38           | 62.50            | 322.41         | 328.41          |
| 21               | 1174.56               | 1.19             | 23.33         | 2.15            | 6.04             | 50.80          | 279.57            | 23.90           | 33.50           | 51.48            | 283.50         | 288.13          |
| 24               | 1148.19               | 0.77             | 13.68         | 1.78            | 6.61             | 37.22          | 261.70            | 20.84           | 34.62           | 48.44            | 263.42         | 267.84          |
| 27               | 935.54                | 0.64             | 7.95          | 1.41            | 8.00             | 12.56          | 219.52            | 21.12           | 37.57           | 49.80            | 218.76         | 224.35          |
| 30               | 786.62                | 0.67             | 28.92         | 1.62            | 6.09             | 11.07          | 189.84            | 19.40           | 29.84           | 41.70            | 191.23         | 195.72          |
| 33               | 529.44                | 0.88             | 5.42          | 2.38            | 4.74             | 6.91           | 124.49            | 12.76           | 26.58           | 33.04            | 124.02         | 128.34          |
| 36               | 365.16                | 1.20             | 7.65          | 2.11            | 4.29             | 5.21           | 79.14             | 6.77            | 23.34           | 27.08            | 78.93          | 83.45           |
| 39               | 277.64                | 0.72             | 6.11          | 1.30            | 3.48             | 11.40          | 61.73             | 4.40            | 19.54           | 21.79            | 62.60          | 66.29           |
| 42               | 200.55                | 0.26             | 6.50          | 1.19            | 2.55             | 7.80           | 48.72             | 3.06            | 16.46           | 18.97            | 49.04          | 52.58           |
| 45               | 118.17                | 0.22             | 4.24          | 0.68            | 2.36             | 5.17           | 31.48             | 1.97            | 14.30           | 17.50            | 30.73          | 35.36           |
| 48               | 56.50                 | 0.29             | 2.97          | 0.61            | 2.06             | 4.21           | 16.32             | 1.21            | 10.61           | 16.50            | 11.80          | 20.29           |
| 52               | 67.23                 | 0.12             | 0.84          | 0.29            | 0.96             | 2.02           | 19.06             | 0.77            | 5.12            | 11.34            | 16.35          | 19.89           |
| 56               | 73.51                 | 0.10             | 0.83          | 0.23            | 0.75             | 1.59           | 19.08             | 0.78            | 4.35            | 8.71             | 17.65          | 19.69           |
| 60               | 55.37                 | 0.08             | 0.56          | 0.13            | 0.95             | 1.17           | 14.85             | 0.73            | 5.56            | 7.86             | 13.89          | 15.95           |
| 64               | 39.75                 | 0.21             | 0.60          | 0.23            | 1.16             | 1.13           | 10.74             | 0.61            | 8.13            | 9.31             | 9.91           | 13.60           |
| 68               | 19.74                 | 0.24             | 0.84          | 0.56            | 3.06             | 2.58           | 8.52              | 0.60            | 14.47           | 15.68            | 7.31           | 17.30           |

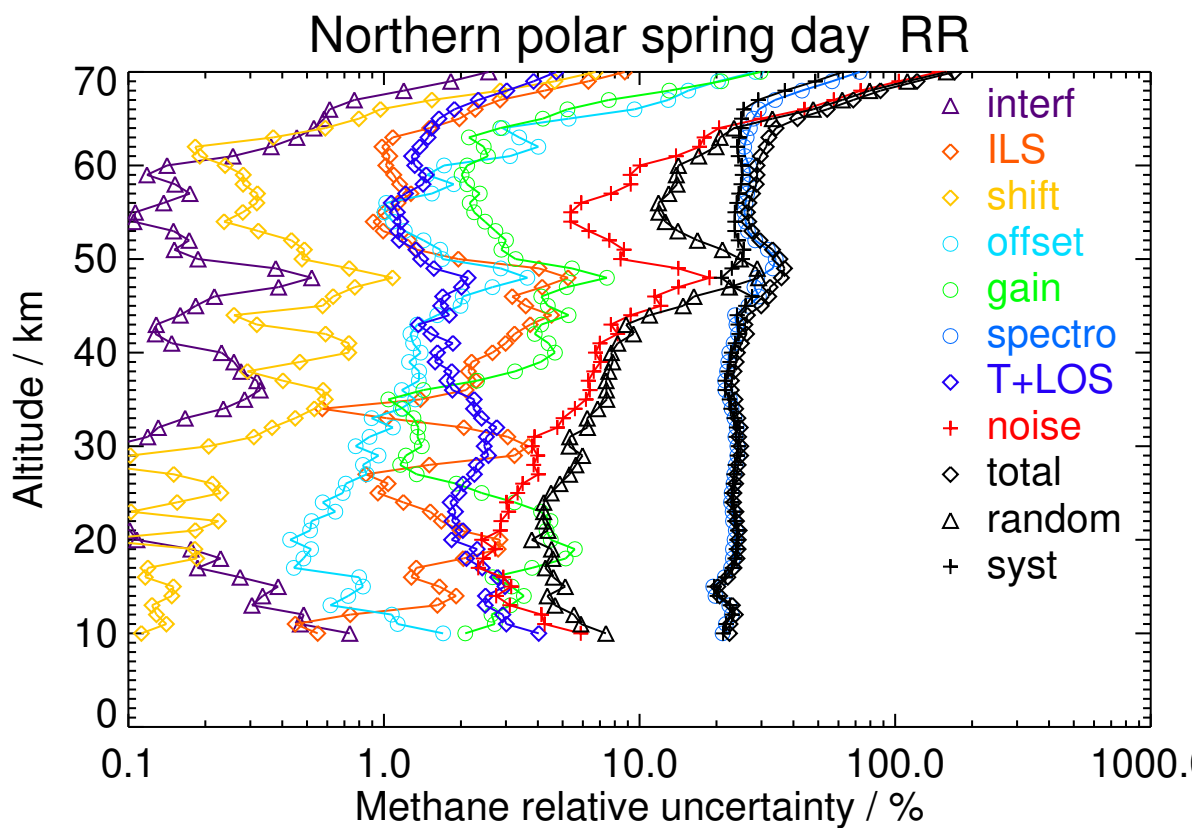

**Figure S37.** V8R\_CH4\_261 Northern polar spring day

**Table S38.** Methane error budget for Northern polar spring night. All uncertainties are  $1\sigma$ .

| altitude<br>(km) | mean target<br>(ppbv) | interf<br>(ppbv) | ILS<br>(ppbv) | shift<br>(ppbv) | offset<br>(ppbv) | gain<br>(ppbv) | spectro<br>(ppbv) | T+LOS<br>(ppbv) | noise<br>(ppbv) | random<br>(ppbv) | syst<br>(ppbv) | total<br>(ppbv) |
|------------------|-----------------------|------------------|---------------|-----------------|------------------|----------------|-------------------|-----------------|-----------------|------------------|----------------|-----------------|
| 12               | 1709.81               | 8.32             | 13.69         | 2.43            | 19.94            | 44.26          | 405.61            | 52.47           | 77.84           | 103.19           | 406.58         | 419.47          |
| 15               | 1626.37               | 5.35             | 18.34         | 2.23            | 13.31            | 38.62          | 337.09            | 42.76           | 46.36           | 74.98            | 337.67         | 345.90          |
| 18               | 1452.32               | 2.88             | 19.80         | 2.34            | 6.86             | 87.14          | 336.54            | 34.16           | 34.03           | 64.10            | 345.72         | 351.61          |
| 21               | 1246.59               | 1.19             | 12.40         | 2.43            | 7.42             | 70.71          | 304.74            | 25.15           | 35.73           | 54.15            | 311.55         | 316.22          |
| 24               | 1092.23               | 0.91             | 19.06         | 1.73            | 5.19             | 31.70          | 254.61            | 19.22           | 31.59           | 48.09            | 255.50         | 259.99          |
| 27               | 972.46                | 0.69             | 7.21          | 1.15            | 8.80             | 13.99          | 231.22            | 21.45           | 41.08           | 54.32            | 230.18         | 236.51          |
| 30               | 784.11                | 0.69             | 24.80         | 1.52            | 6.07             | 10.95          | 190.24            | 19.22           | 29.45           | 40.03            | 191.32         | 195.46          |
| 33               | 537.79                | 0.87             | 3.87          | 1.89            | 4.16             | 6.42           | 127.71            | 13.22           | 26.56           | 34.18            | 126.89         | 131.41          |
| 36               | 368.56                | 1.17             | 8.75          | 2.23            | 3.77             | 6.39           | 86.33             | 6.90            | 23.01           | 26.53            | 86.39          | 90.38           |
| 39               | 305.19                | 0.87             | 6.61          | 1.61            | 3.38             | 12.92          | 74.71             | 4.86            | 19.61           | 22.37            | 75.60          | 78.84           |
| 42               | 219.54                | 0.26             | 8.40          | 1.25            | 2.27             | 9.33           | 53.86             | 3.78            | 16.11           | 17.82            | 54.97          | 57.79           |
| 45               | 147.02                | 0.20             | 4.10          | 0.62            | 2.29             | 5.23           | 35.00             | 2.43            | 14.75           | 16.10            | 35.20          | 38.70           |
| 48               | 109.84                | 0.33             | 4.33          | 0.64            | 2.31             | 6.52           | 22.92             | 2.06            | 12.05           | 14.50            | 23.06          | 27.24           |
| 52               | 77.81                 | 0.13             | 1.21          | 0.31            | 1.17             | 1.90           | 20.34             | 0.95            | 6.73            | 11.06            | 18.55          | 21.60           |
| 56               | 87.03                 | 0.08             | 0.78          | 0.23            | 0.77             | 1.96           | 21.95             | 0.96            | 4.78            | 8.22             | 21.05          | 22.59           |
| 60               | 60.67                 | 0.08             | 0.74          | 0.22            | 0.81             | 1.34           | 16.57             | 1.00            | 5.63            | 8.03             | 15.68          | 17.62           |
| 64               | 37.61                 | 0.20             | 0.32          | 0.24            | 1.02             | 0.57           | 10.96             | 0.74            | 8.09            | 9.29             | 10.08          | 13.70           |
| 68               | 20.45                 | 0.20             | 0.40          | 0.52            | 3.37             | 1.50           | 9.95              | 0.71            | 15.56           | 17.06            | 8.04           | 18.86           |

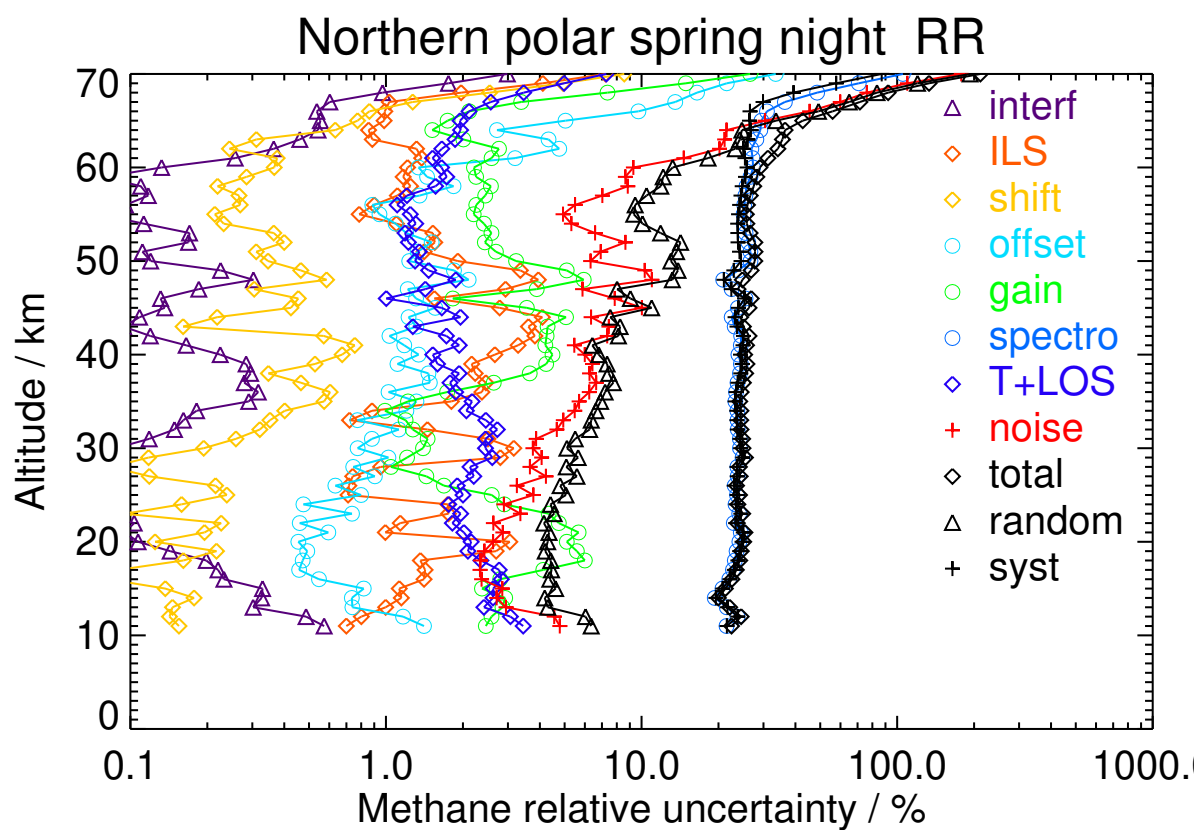

**Figure S38.** V8R\_CH4\_261 Northern polar spring night

**Table S39.** Methane error budget for Northern polar summer day. All uncertainties are  $1\sigma$ .

| altitude<br>(km) | mean target<br>(ppbv) | interf<br>(ppbv) | ILS<br>(ppbv) | shift<br>(ppbv) | offset<br>(ppbv) | gain<br>(ppbv) | spectro<br>(ppbv) | T+LOS<br>(ppbv) | noise<br>(ppbv) | random<br>(ppbv) | syst<br>(ppbv) | total<br>(ppbv) |
|------------------|-----------------------|------------------|---------------|-----------------|------------------|----------------|-------------------|-----------------|-----------------|------------------|----------------|-----------------|
| 12               | 1843.22               | 11.38            | 19.14         | 2.58            | 19.07            | 43.12          | 398.94            | 53.52           | 77.66           | 110.02           | 398.34         | 413.25          |
| 15               | 1769.22               | 9.07             | 50.49         | 4.24            | 12.23            | 59.32          | 346.03            | 46.57           | 46.92           | 87.66            | 350.34         | 361.14          |
| 18               | 1642.57               | 3.41             | 62.65         | 3.77            | 7.70             | 93.25          | 378.05            | 30.38           | 32.59           | 104.78           | 382.93         | 397.00          |
| 21               | 1286.26               | 2.09             | 53.06         | 5.24            | 7.70             | 31.79          | 342.99            | 29.63           | 34.90           | 74.09            | 343.75         | 351.64          |
| 24               | 1133.34               | 1.31             | 15.14         | 1.35            | 2.89             | 10.07          | 250.59            | 14.77           | 19.80           | 34.58            | 250.11         | 252.49          |
| 27               | 1073.63               | 0.76             | 11.63         | 4.05            | 8.13             | 9.79           | 256.00            | 21.70           | 34.10           | 44.32            | 255.97         | 259.78          |
| 30               | 916.31                | 0.69             | 45.73         | 1.85            | 3.83             | 24.81          | 171.90            | 12.46           | 19.03           | 28.22            | 178.88         | 181.09          |
| 33               | 706.98                | 1.00             | 6.83          | 2.52            | 3.72             | 18.81          | 141.71            | 9.61            | 22.30           | 27.40            | 142.63         | 145.23          |
| 36               | 502.13                | 1.89             | 18.49         | 3.26            | 3.66             | 10.51          | 109.96            | 5.70            | 22.60           | 26.03            | 111.52         | 114.52          |
| 39               | 317.43                | 1.31             | 8.29          | 1.66            | 3.05             | 11.66          | 70.06             | 3.20            | 20.37           | 22.72            | 70.96          | 74.51           |
| 42               | 244.09                | 0.59             | 7.42          | 1.27            | 2.37             | 9.36           | 56.11             | 2.28            | 17.20           | 19.66            | 56.69          | 60.00           |
| 45               | 174.75                | 0.39             | 4.11          | 0.74            | 2.42             | 6.43           | 50.26             | 1.99            | 16.94           | 20.36            | 49.67          | 53.68           |
| 48               | 119.15                | 0.31             | 9.05          | 0.95            | 2.54             | 10.56          | 27.74             | 2.22            | 14.87           | 20.33            | 27.99          | 34.59           |
| 52               | 76.46                 | 0.24             | 3.65          | 0.28            | 1.77             | 4.06           | 18.74             | 1.02            | 10.87           | 16.37            | 15.34          | 22.44           |
| 56               | 71.85                 | 0.12             | 1.37          | 0.32            | 0.97             | 1.81           | 18.02             | 0.67            | 5.94            | 8.10             | 17.35          | 19.15           |
| 60               | 69.17                 | 0.17             | 0.66          | 0.27            | 0.86             | 0.63           | 17.50             | 0.69            | 4.53            | 5.86             | 17.16          | 18.13           |
| 64               | 72.01                 | 0.25             | 1.14          | 0.25            | 0.80             | 0.90           | 19.55             | 0.79            | 6.16            | 7.08             | 19.33          | 20.58           |
| 68               | 96.49                 | 0.53             | 2.23          | 1.06            | 1.91             | 3.24           | 27.39             | 1.22            | 10.30           | 11.66            | 27.25          | 29.64           |

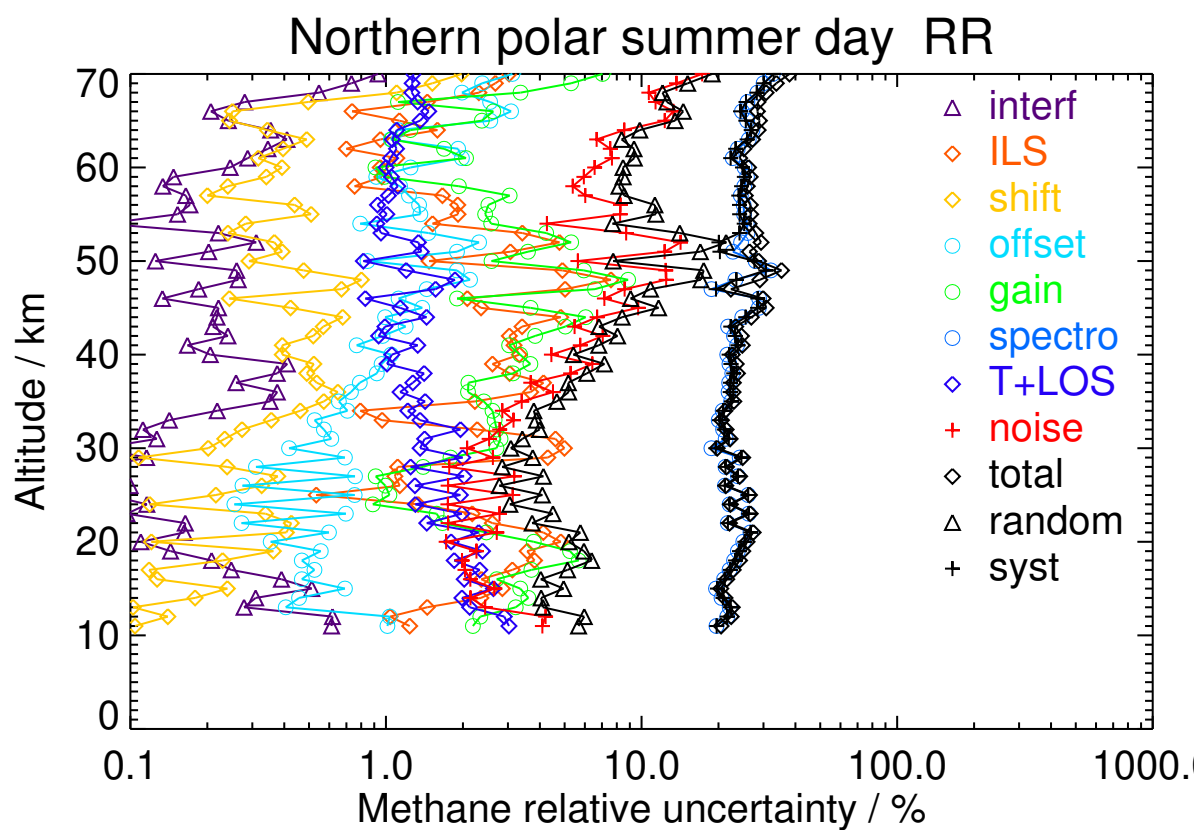

**Figure S39.** V8R\_CH4\_261 Northern polar summer day

**Table S40.** Methane error budget for Northern polar summer night. All uncertainties are  $1\sigma$ .

| altitude<br>(km) | mean target<br>(ppbv) | interf<br>(ppbv) | ILS<br>(ppbv) | shift<br>(ppbv) | offset<br>(ppbv) | gain<br>(ppbv) | spectro<br>(ppbv) | T+LOS<br>(ppbv) | noise<br>(ppbv) | random<br>(ppbv) | syst<br>(ppbv) | total<br>(ppbv) |
|------------------|-----------------------|------------------|---------------|-----------------|------------------|----------------|-------------------|-----------------|-----------------|------------------|----------------|-----------------|
| 15               | 1841.87               | 6.03             | 33.34         | 1.72            | 26.62            | 20.83          | 428.98            | 89.31           | 78.34           | 127.97           | 429.02         | 447.70          |
| 18               | 1634.77               | 1.55             | 58.28         | 2.31            | 8.07             | 111.79         | 356.84            | 41.24           | 31.38           | 79.35            | 373.75         | 382.08          |
| 21               | 1347.15               | 1.28             | 31.34         | 3.32            | 7.87             | 75.16          | 344.22            | 28.89           | 31.63           | 72.11            | 349.04         | 356.41          |
| 24               | 1114.34               | 1.18             | 18.63         | 1.35            | 4.60             | 14.74          | 253.27            | 19.18           | 24.49           | 39.35            | 253.28         | 256.32          |
| 27               | 1028.79               | 0.64             | 13.90         | 2.68            | 7.20             | 12.11          | 249.39            | 21.09           | 31.36           | 42.17            | 249.49         | 253.02          |
| 30               | 839.76                | 0.93             | 32.92         | 2.13            | 4.86             | 20.38          | 169.09            | 16.22           | 21.09           | 34.06            | 172.25         | 175.58          |
| 33               | 590.09                | 0.98             | 5.83          | 1.82            | 3.68             | 15.37          | 131.73            | 12.62           | 23.77           | 29.62            | 132.24         | 135.52          |
| 36               | 370.82                | 1.69             | 13.70         | 2.42            | 3.73             | 11.63          | 84.28             | 5.87            | 24.04           | 27.01            | 85.62          | 89.78           |
| 39               | 231.98                | 0.64             | 7.39          | 0.89            | 2.80             | 10.73          | 55.44             | 3.49            | 21.89           | 24.46            | 56.08          | 61.19           |
| 42               | 156.86                | 0.45             | 8.40          | 0.76            | 2.51             | 6.48           | 41.44             | 2.58            | 18.84           | 21.28            | 41.78          | 46.89           |
| 45               | 86.61                 | 0.24             | 3.47          | 0.28            | 2.59             | 4.79           | 20.63             | 1.58            | 16.69           | 18.98            | 19.71          | 27.36           |
| 48               | 79.30                 | 0.23             | 2.87          | 0.41            | 1.97             | 4.32           | 19.72             | 1.31            | 11.40           | 14.38            | 18.57          | 23.48           |
| 52               | 77.51                 | 0.08             | 0.95          | 0.22            | 1.09             | 1.63           | 19.16             | 0.82            | 6.79            | 9.63             | 18.06          | 20.46           |
| 56               | 92.53                 | 0.12             | 0.58          | 0.36            | 0.79             | 2.15           | 23.52             | 1.10            | 5.05            | 10.26            | 21.91          | 24.20           |
| 60               | 119.11                | 0.20             | 0.88          | 0.42            | 0.92             | 2.46           | 32.38             | 1.61            | 5.76            | 14.46            | 29.72          | 33.05           |
| 64               | 170.73                | 0.48             | 1.35          | 0.73            | 1.47             | 2.18           | 44.71             | 2.40            | 8.60            | 14.60            | 43.30          | 45.69           |
| 68               | 178.15                | 0.79             | 1.15          | 1.65            | 3.86             | 2.84           | 51.63             | 3.62            | 18.83           | 23.75            | 49.98          | 55.33           |

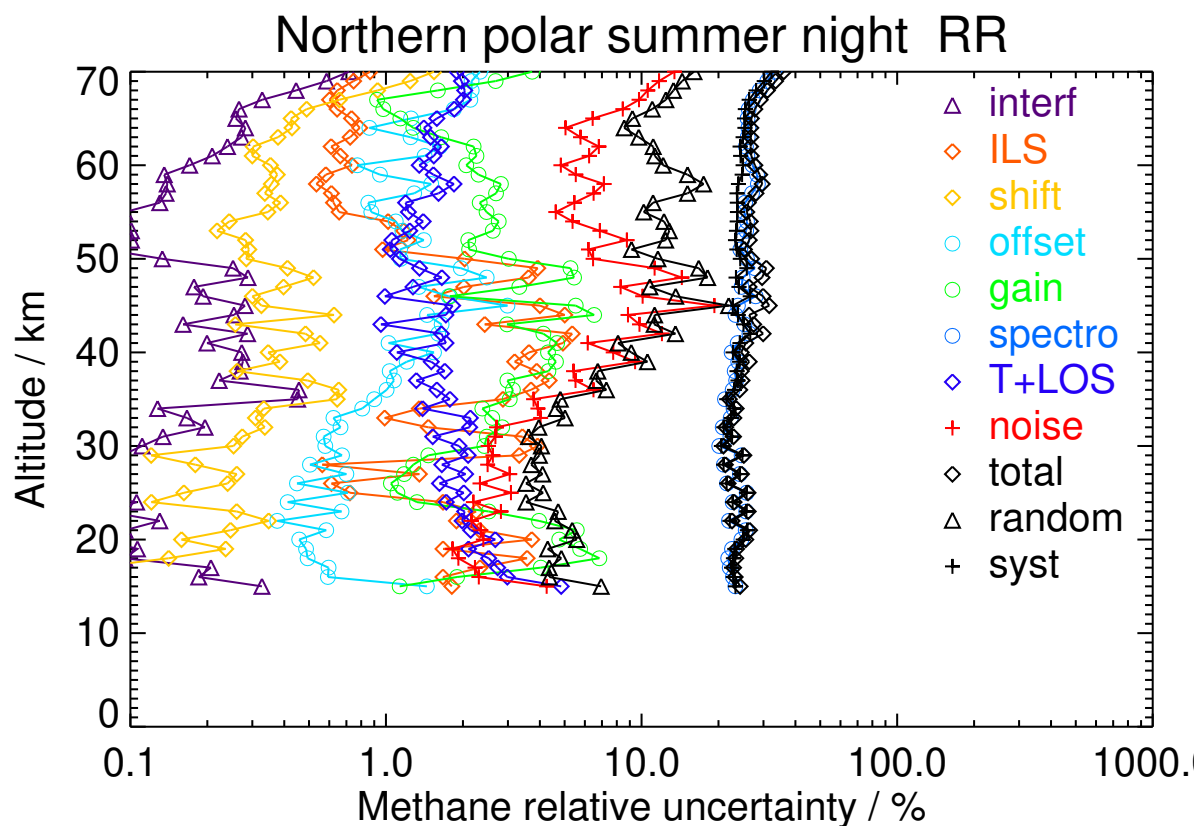

**Figure S40.** V8R\_CH4\_261 Northern polar summer night



**Table S41.** Methane error budget for Northern polar autumn day. All uncertainties are  $1\sigma$ .

| altitude<br>(km) | mean target<br>(ppbv) | interf<br>(ppbv) | ILS<br>(ppbv) | shift<br>(ppbv) | offset<br>(ppbv) | gain<br>(ppbv) | spectro<br>(ppbv) | T+LOS<br>(ppbv) | noise<br>(ppbv) | random<br>(ppbv) | syst<br>(ppbv) | total<br>(ppbv) |
|------------------|-----------------------|------------------|---------------|-----------------|------------------|----------------|-------------------|-----------------|-----------------|------------------|----------------|-----------------|
| 15               | 1625.29               | 13.39            | 17.25         | 3.10            | 15.79            | 33.74          | 335.37            | 44.70           | 57.19           | 83.25            | 335.68         | 345.85          |
| 18               | 1483.33               | 1.90             | 21.53         | 2.92            | 5.15             | 73.36          | 328.90            | 35.49           | 31.96           | 67.14            | 334.41         | 341.08          |
| 21               | 1202.93               | 1.31             | 26.56         | 1.40            | 7.05             | 70.23          | 289.32            | 24.12           | 33.02           | 65.44            | 294.60         | 301.78          |
| 24               | 1060.73               | 1.51             | 20.29         | 1.58            | 6.55             | 37.79          | 241.64            | 20.98           | 33.54           | 51.64            | 243.25         | 248.68          |
| 27               | 849.96                | 1.24             | 16.12         | 1.34            | 7.70             | 17.44          | 203.32            | 19.09           | 35.99           | 53.81            | 201.82         | 208.87          |
| 30               | 610.47                | 1.17             | 12.53         | 1.38            | 6.32             | 14.84          | 153.09            | 16.47           | 26.93           | 54.25            | 148.02         | 157.65          |
| 33               | 351.31                | 1.18             | 3.93          | 1.11            | 3.87             | 9.90           | 92.06             | 10.57           | 24.39           | 46.31            | 84.66          | 96.50           |
| 36               | 217.74                | 1.06             | 4.88          | 1.09            | 2.85             | 8.58           | 60.78             | 5.03            | 20.18           | 41.10            | 50.46          | 65.08           |
| 39               | 141.18                | 0.79             | 5.41          | 0.84            | 2.18             | 7.99           | 42.63             | 2.90            | 15.92           | 35.90            | 29.83          | 46.68           |
| 42               | 165.10                | 0.54             | 6.52          | 0.94            | 2.23             | 11.35          | 49.28             | 3.01            | 12.56           | 36.98            | 37.49          | 52.66           |
| 45               | 193.34                | 0.30             | 5.33          | 0.48            | 2.05             | 11.16          | 49.86             | 3.18            | 11.10           | 28.03            | 44.63          | 52.70           |
| 48               | 218.01                | 0.48             | 3.49          | 0.57            | 2.80             | 13.09          | 50.20             | 4.08            | 11.00           | 19.25            | 49.79          | 53.38           |
| 52               | 238.04                | 0.36             | 2.52          | 0.39            | 2.43             | 10.58          | 55.24             | 3.95            | 9.07            | 16.55            | 54.77          | 57.22           |
| 56               | 207.74                | 0.30             | 1.36          | 0.48            | 1.35             | 4.83           | 50.29             | 3.70            | 8.51            | 16.75            | 48.60          | 51.41           |
| 60               | 154.35                | 0.24             | 1.31          | 0.29            | 1.15             | 2.80           | 38.76             | 3.17            | 9.46            | 15.86            | 36.90          | 40.16           |
| 64               | 92.18                 | 0.26             | 1.08          | 0.20            | 1.74             | 1.60           | 24.30             | 1.89            | 11.14           | 14.04            | 22.98          | 26.93           |
| 68               | 55.72                 | 0.36             | 1.18          | 0.47            | 4.15             | 3.73           | 18.23             | 1.69            | 19.92           | 22.32            | 16.32          | 27.65           |

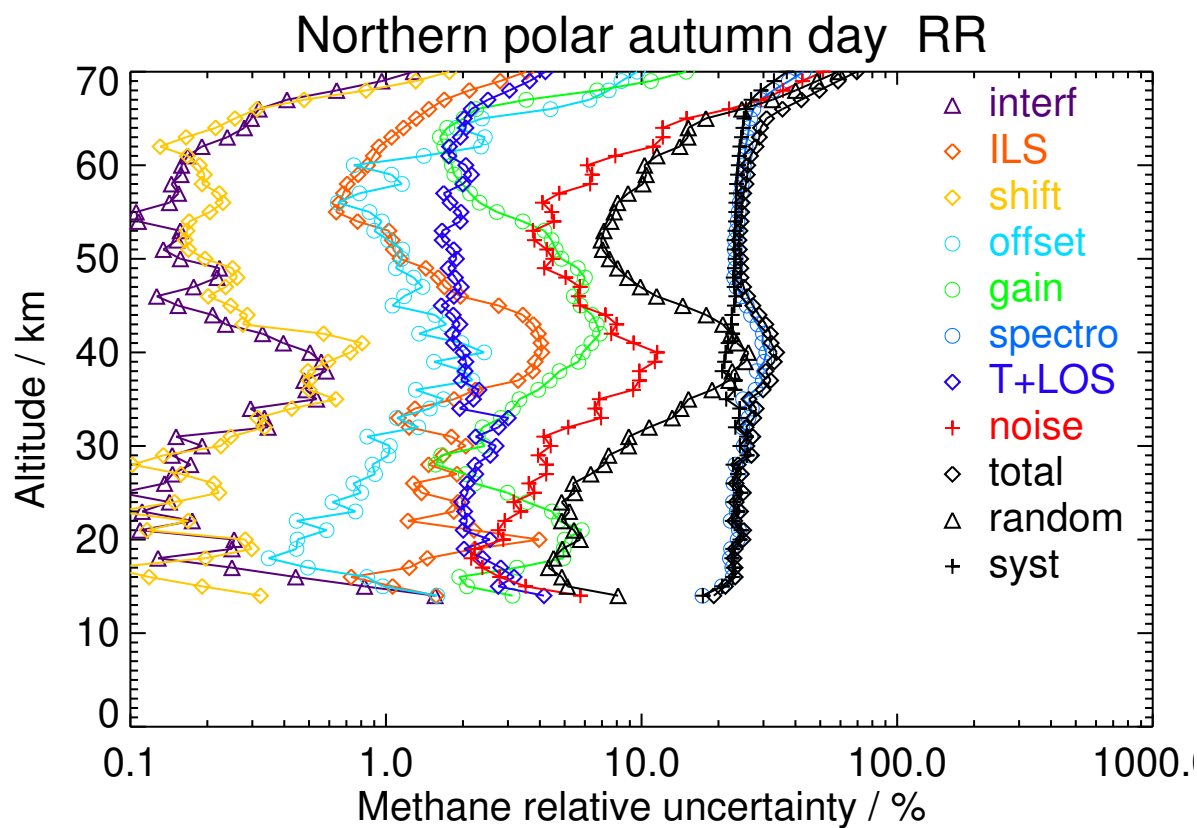

**Figure S41.** V8R\_CH4\_261 Northern polar autumn day

**Table S42.** Methane error budget for Northern polar autumn night. All uncertainties are  $1\sigma$ .

| altitude<br>(km) | mean target<br>(ppbv) | interf<br>(ppbv) | ILS<br>(ppbv) | shift<br>(ppbv) | offset<br>(ppbv) | gain<br>(ppbv) | spectro<br>(ppbv) | T+LOS<br>(ppbv) | noise<br>(ppbv) | random<br>(ppbv) | syst<br>(ppbv) | total<br>(ppbv) |
|------------------|-----------------------|------------------|---------------|-----------------|------------------|----------------|-------------------|-----------------|-----------------|------------------|----------------|-----------------|
| 15               | 1618.58               | 12.63            | 17.04         | 3.30            | 16.42            | 30.26          | 344.41            | 45.55           | 57.77           | 93.04            | 342.08         | 354.51          |
| 18               | 1455.36               | 2.10             | 19.98         | 3.35            | 5.96             | 79.02          | 346.23            | 34.82           | 32.94           | 66.51            | 352.77         | 358.98          |
| 21               | 1227.13               | 1.50             | 21.67         | 1.38            | 7.03             | 65.80          | 309.30            | 23.13           | 33.58           | 54.89            | 314.91         | 319.66          |
| 24               | 1035.15               | 1.79             | 20.41         | 1.39            | 6.37             | 35.77          | 247.52            | 20.22           | 32.83           | 50.00            | 248.99         | 253.96          |
| 27               | 813.68                | 1.50             | 13.94         | 1.07            | 7.69             | 16.98          | 203.96            | 18.72           | 36.77           | 57.91            | 201.23         | 209.40          |
| 30               | 545.84                | 1.66             | 11.03         | 1.61            | 6.03             | 12.83          | 141.78            | 15.28           | 26.33           | 49.60            | 137.46         | 146.14          |
| 33               | 343.07                | 1.19             | 4.07          | 2.09            | 3.74             | 13.64          | 96.01             | 9.74            | 23.89           | 58.43            | 81.81          | 100.53          |
| 36               | 236.50                | 1.19             | 5.74          | 1.24            | 2.91             | 8.30           | 73.45             | 5.06            | 21.43           | 55.79            | 53.66          | 77.41           |
| 39               | 174.51                | 1.22             | 7.13          | 1.23            | 2.27             | 8.68           | 60.18             | 3.41            | 17.36           | 51.57            | 37.54          | 63.78           |
| 42               | 162.19                | 0.77             | 7.82          | 1.12            | 2.27             | 11.14          | 52.90             | 3.13            | 13.12           | 42.61            | 36.84          | 56.33           |
| 45               | 171.05                | 0.25             | 3.89          | 0.39            | 1.83             | 7.89           | 45.07             | 2.88            | 11.04           | 25.18            | 40.11          | 47.36           |
| 48               | 194.56                | 0.26             | 4.30          | 0.48            | 2.45             | 10.89          | 48.04             | 3.80            | 9.97            | 20.38            | 46.37          | 50.65           |
| 52               | 216.54                | 0.28             | 3.21          | 0.36            | 2.02             | 8.72           | 50.57             | 3.42            | 7.95            | 13.77            | 50.33          | 52.18           |
| 56               | 200.55                | 0.22             | 1.93          | 0.51            | 1.32             | 5.93           | 49.27             | 3.46            | 7.82            | 15.57            | 47.95          | 50.41           |
| 60               | 146.66                | 0.08             | 1.45          | 0.22            | 1.15             | 3.75           | 38.11             | 3.04            | 8.91            | 15.85            | 36.15          | 39.47           |
| 64               | 94.97                 | 0.21             | 0.98          | 0.29            | 1.84             | 1.69           | 27.72             | 2.04            | 11.05           | 16.40            | 25.15          | 30.03           |
| 68               | 73.80                 | 0.27             | 1.31          | 0.87            | 4.24             | 2.19           | 25.96             | 2.21            | 20.36           | 25.21            | 21.98          | 33.45           |

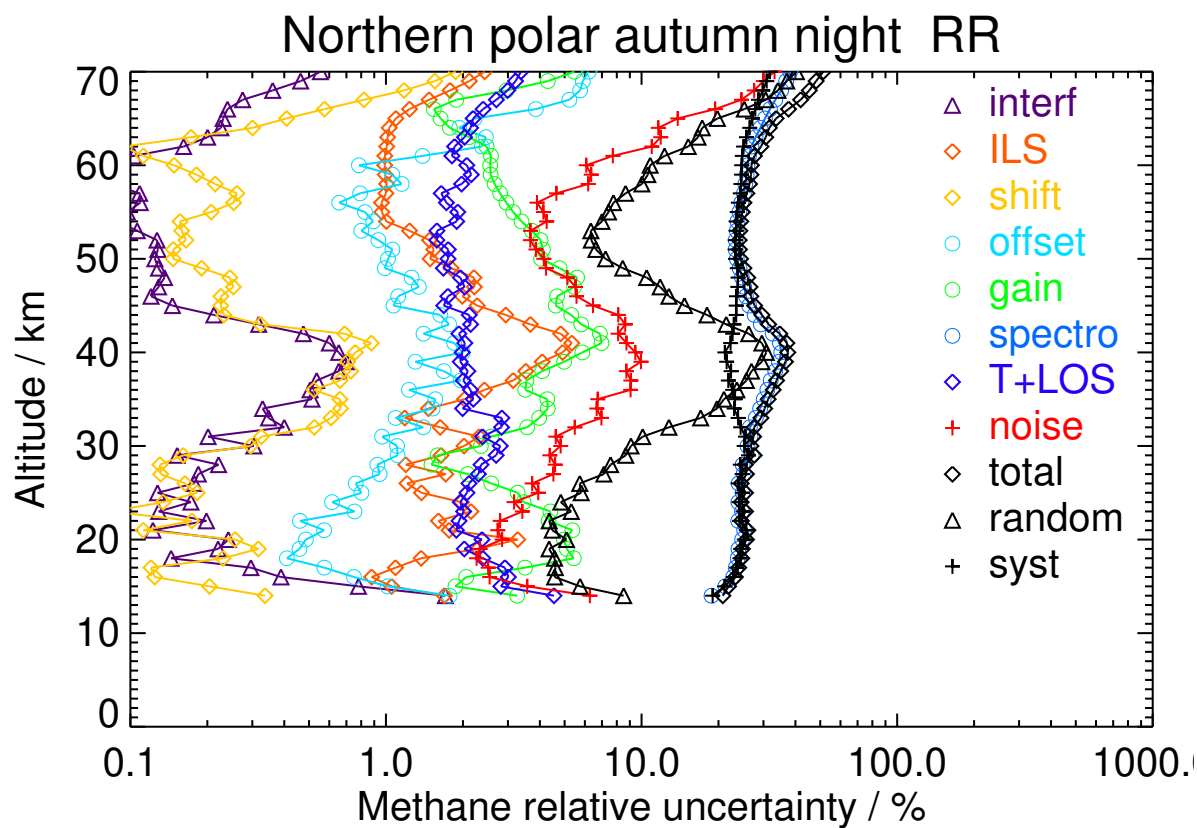

**Figure S42.** V8R\_CH4\_261 Northern polar autumn night

**Table S43.** Methane error budget for Northern midlatitude winter day. All uncertainties are  $1\sigma$ .

| altitude<br>(km) | mean target<br>(ppbv) | interf<br>(ppbv) | ILS<br>(ppbv) | shift<br>(ppbv) | offset<br>(ppbv) | gain<br>(ppbv) | spectro<br>(ppbv) | T+LOS<br>(ppbv) | noise<br>(ppbv) | random<br>(ppbv) | syst<br>(ppbv) | total<br>(ppbv) |
|------------------|-----------------------|------------------|---------------|-----------------|------------------|----------------|-------------------|-----------------|-----------------|------------------|----------------|-----------------|
| 12               | 1771.39               | 11.84            | 17.03         | 2.37            | 22.35            | 40.10          | 398.81            | 52.43           | 90.91           | 115.01           | 399.22         | 415.46          |
| 15               | 1658.32               | 5.65             | 53.73         | 2.50            | 11.67            | 50.97          | 351.47            | 37.82           | 44.54           | 82.38            | 354.71         | 364.15          |
| 18               | 1608.30               | 3.36             | 53.99         | 3.04            | 11.29            | 103.58         | 385.27            | 39.97           | 37.02           | 96.98            | 394.70         | 406.44          |
| 21               | 1345.93               | 1.50             | 48.98         | 1.82            | 4.61             | 37.34          | 339.38            | 27.40           | 35.87           | 70.68            | 340.65         | 347.91          |
| 24               | 1289.13               | 1.26             | 36.02         | 1.91            | 6.04             | 27.02          | 311.54            | 21.44           | 30.36           | 67.96            | 309.66         | 317.03          |
| 27               | 1141.01               | 0.93             | 19.98         | 3.36            | 8.00             | 16.09          | 266.86            | 22.01           | 36.69           | 64.97            | 263.74         | 271.63          |
| 30               | 1155.91               | 1.07             | 47.51         | 2.65            | 6.12             | 28.86          | 262.06            | 19.31           | 24.58           | 59.59            | 263.13         | 269.79          |
| 33               | 1005.04               | 1.46             | 17.57         | 5.25            | 6.11             | 27.73          | 222.84            | 15.62           | 21.99           | 53.81            | 220.53         | 227.00          |
| 36               | 539.91                | 1.51             | 18.73         | 2.89            | 4.93             | 18.70          | 132.43            | 9.29            | 18.01           | 54.23            | 125.47         | 136.68          |
| 39               | 355.20                | 0.99             | 13.86         | 1.65            | 4.07             | 15.18          | 78.00             | 5.61            | 15.84           | 31.81            | 76.14          | 82.52           |
| 42               | 308.15                | 0.61             | 15.30         | 1.67            | 3.77             | 19.54          | 71.60             | 4.81            | 13.78           | 28.83            | 71.71          | 77.29           |
| 45               | 282.22                | 0.50             | 10.83         | 1.38            | 2.86             | 13.52          | 65.51             | 4.26            | 12.60           | 23.70            | 64.95          | 69.13           |
| 48               | 251.39                | 0.45             | 5.50          | 1.11            | 2.47             | 10.19          | 57.11             | 3.97            | 10.30           | 19.40            | 56.12          | 59.38           |
| 52               | 194.72                | 0.25             | 2.02          | 0.59            | 1.80             | 5.12           | 44.48             | 3.12            | 8.11            | 12.52            | 43.94          | 45.69           |
| 56               | 181.61                | 0.25             | 2.77          | 0.44            | 1.61             | 3.21           | 42.88             | 3.20            | 8.86            | 12.05            | 42.46          | 44.13           |
| 60               | 185.36                | 0.30             | 3.05          | 0.50            | 2.01             | 2.89           | 43.67             | 3.83            | 12.41           | 15.17            | 43.21          | 45.80           |
| 64               | 152.47                | 0.50             | 1.56          | 1.00            | 3.40             | 4.10           | 41.06             | 3.74            | 17.81           | 21.46            | 39.85          | 45.26           |
| 68               | 86.85                 | 1.03             | 4.06          | 2.20            | 5.05             | 12.63          | 44.63             | 3.61            | 25.14           | 33.00            | 41.90          | 53.33           |

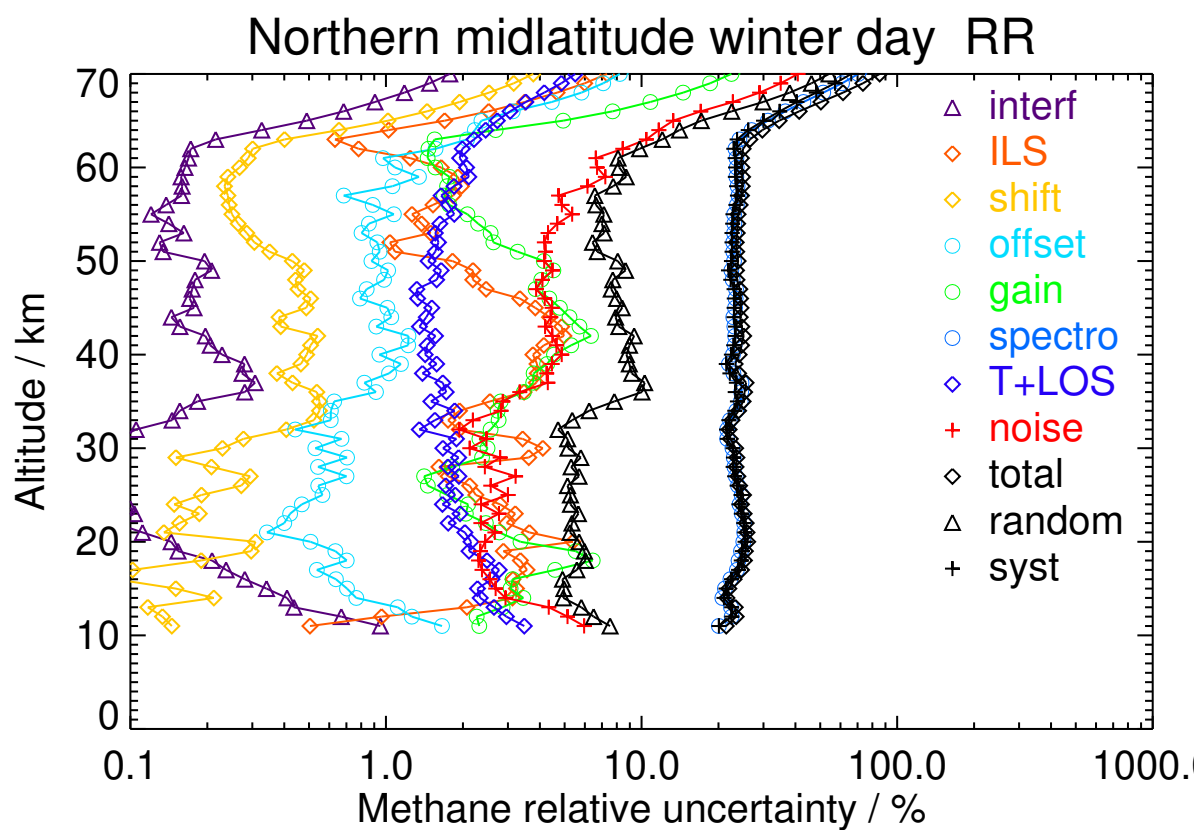

**Figure S43.** V8R\_CH4\_261 Northern midlatitude winter day

**Table S44.** Methane error budget for Northern midlatitude winter night. All uncertainties are  $1\sigma$ .

| altitude (km) | mean target (ppbv) | interf (ppbv) | ILS (ppbv) | shift (ppbv) | offset (ppbv) | gain (ppbv) | spectro (ppbv) | T+LOS (ppbv) | noise (ppbv) | random (ppbv) | syst (ppbv) | total (ppbv) |
|---------------|--------------------|---------------|------------|--------------|---------------|-------------|----------------|--------------|--------------|---------------|-------------|--------------|
| 12            | 1855.06            | 10.10         | 27.38      | 2.04         | 23.62         | 53.02       | 424.54         | 55.25        | 89.48        | 117.88        | 426.18      | 442.18       |
| 15            | 1745.37            | 5.65          | 49.65      | 2.71         | 12.20         | 48.75       | 353.15         | 39.84        | 44.33        | 76.72         | 356.95      | 365.10       |
| 18            | 1614.13            | 2.85          | 47.85      | 3.22         | 9.50          | 84.45       | 366.32         | 36.66        | 34.91        | 95.39         | 370.39      | 382.47       |
| 21            | 1368.28            | 1.62          | 56.29      | 2.00         | 5.52          | 33.39       | 350.83         | 29.47        | 37.45        | 73.81         | 352.45      | 360.10       |
| 24            | 1296.39            | 1.20          | 33.40      | 1.27         | 6.10          | 18.34       | 317.93         | 21.56        | 31.37        | 60.38         | 316.82      | 322.52       |
| 27            | 1150.42            | 1.03          | 18.07      | 3.75         | 8.45          | 12.72       | 268.20         | 22.82        | 37.69        | 63.72         | 265.31      | 272.85       |
| 30            | 1114.08            | 1.12          | 49.05      | 1.69         | 5.72          | 22.20       | 255.05         | 18.54        | 23.45        | 56.06         | 256.39      | 262.45       |
| 33            | 938.76             | 1.58          | 10.63      | 5.93         | 5.62          | 22.73       | 210.52         | 14.01        | 21.06        | 54.01         | 206.73      | 213.67       |
| 36            | 547.02             | 1.66          | 16.35      | 2.53         | 4.92          | 13.64       | 127.02         | 8.81         | 17.61        | 51.82         | 119.67      | 130.41       |
| 39            | 357.96             | 0.86          | 14.16      | 1.73         | 3.86          | 15.34       | 80.87          | 5.23         | 14.37        | 29.54         | 79.72       | 85.02        |
| 42            | 303.18             | 0.57          | 12.27      | 1.68         | 3.45          | 16.56       | 71.52          | 4.40         | 12.21        | 26.17         | 70.98       | 75.65        |
| 45            | 301.96             | 0.43          | 12.27      | 1.56         | 2.74          | 15.26       | 71.63          | 4.21         | 10.80        | 26.26         | 70.49       | 75.22        |
| 48            | 249.62             | 0.34          | 4.45       | 1.15         | 1.90          | 7.56        | 56.78          | 3.31         | 8.48         | 16.86         | 55.72       | 58.21        |
| 52            | 180.09             | 0.28          | 2.57       | 0.53         | 1.46          | 3.32        | 40.93          | 2.75         | 6.90         | 10.83         | 40.41       | 41.84        |
| 56            | 171.03             | 0.28          | 2.83       | 0.29         | 1.47          | 1.95        | 39.32          | 3.00         | 8.24         | 10.31         | 39.12       | 40.46        |
| 60            | 168.61             | 0.32          | 2.92       | 0.58         | 2.01          | 2.42        | 39.53          | 3.72         | 12.37        | 14.34         | 39.28       | 41.81        |
| 64            | 151.36             | 0.47          | 1.83       | 1.20         | 3.55          | 3.44        | 40.37          | 3.83         | 18.16        | 22.28         | 38.82       | 44.76        |
| 68            | 120.10             | 0.81          | 5.24       | 2.41         | 4.58          | 9.61        | 41.95          | 3.67         | 24.66        | 31.10         | 39.51       | 50.28        |

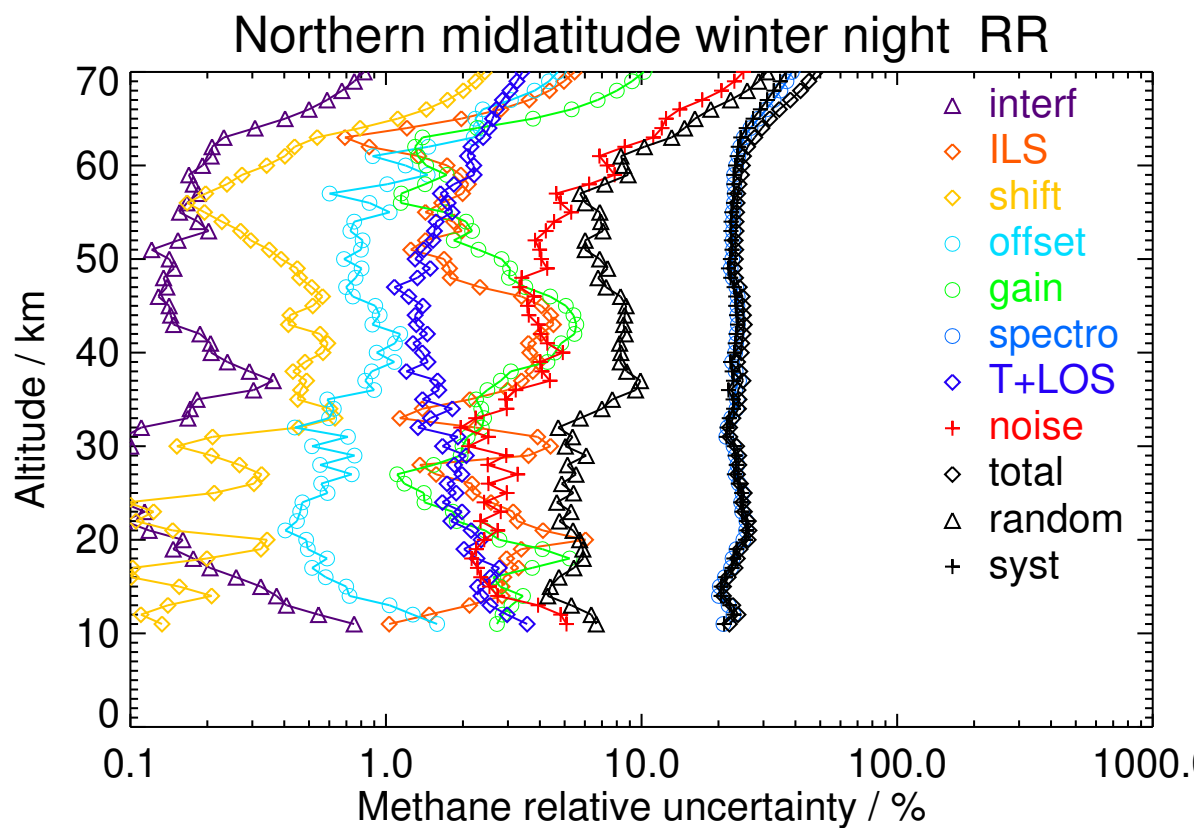

**Figure S44.** V8R\_CH4\_261 Northern midlatitude winter night

**Table S45.** Methane error budget for Northern midlatitude spring day. All uncertainties are  $1\sigma$ .

| altitude<br>(km) | mean target<br>(ppbv) | interf<br>(ppbv) | ILS<br>(ppbv) | shift<br>(ppbv) | offset<br>(ppbv) | gain<br>(ppbv) | spectro<br>(ppbv) | T+LOS<br>(ppbv) | noise<br>(ppbv) | random<br>(ppbv) | syst<br>(ppbv) | total<br>(ppbv) |
|------------------|-----------------------|------------------|---------------|-----------------|------------------|----------------|-------------------|-----------------|-----------------|------------------|----------------|-----------------|
| 12               | 1796.90               | 8.00             | 18.14         | 2.01            | 12.70            | 55.69          | 416.30            | 46.35           | 61.43           | 92.13            | 417.61         | 427.66          |
| 15               | 1750.56               | 6.16             | 42.90         | 2.49            | 11.80            | 55.27          | 366.26            | 43.30           | 46.18           | 87.41            | 368.23         | 378.46          |
| 18               | 1628.81               | 3.32             | 57.36         | 3.80            | 12.23            | 123.82         | 362.25            | 42.31           | 38.41           | 97.16            | 379.27         | 391.52          |
| 21               | 1318.12               | 1.48             | 30.76         | 2.16            | 5.64             | 57.53          | 314.65            | 27.89           | 35.45           | 73.34            | 316.15         | 324.55          |
| 24               | 1163.23               | 1.01             | 18.96         | 2.15            | 7.09             | 19.70          | 282.98            | 22.88           | 36.35           | 55.10            | 282.29         | 287.62          |
| 27               | 1114.52               | 0.88             | 9.95          | 2.68            | 6.51             | 16.02          | 251.80            | 19.89           | 32.56           | 57.05            | 249.02         | 255.47          |
| 30               | 1021.05               | 1.02             | 39.99         | 2.58            | 7.19             | 22.66          | 243.12            | 21.12           | 29.11           | 65.96            | 241.30         | 250.15          |
| 33               | 750.46                | 1.12             | 9.17          | 2.36            | 5.40             | 18.11          | 165.83            | 14.10           | 23.17           | 48.24            | 162.35         | 169.36          |
| 36               | 476.08                | 1.60             | 9.08          | 2.43            | 4.38             | 10.97          | 105.70            | 7.56            | 19.29           | 40.42            | 100.99         | 108.78          |
| 39               | 386.99                | 1.24             | 7.62          | 1.93            | 3.75             | 12.93          | 85.03             | 5.09            | 16.54           | 31.94            | 82.18          | 88.17           |
| 42               | 358.98                | 0.69             | 14.40         | 1.85            | 3.31             | 17.94          | 86.25             | 4.67            | 13.59           | 30.73            | 85.12          | 90.50           |
| 45               | 285.97                | 0.38             | 9.59          | 1.12            | 2.72             | 15.96          | 72.99             | 4.13            | 11.30           | 31.80            | 69.40          | 76.34           |
| 48               | 282.17                | 0.52             | 7.23          | 1.43            | 2.72             | 15.77          | 69.99             | 4.28            | 9.52            | 27.95            | 67.36          | 72.93           |
| 52               | 211.29                | 0.34             | 2.74          | 0.57            | 1.44             | 5.01           | 49.66             | 3.21            | 7.39            | 15.94            | 48.08          | 50.65           |
| 56               | 168.01                | 0.27             | 1.26          | 0.60            | 1.18             | 1.88           | 39.94             | 2.99            | 7.00            | 11.61            | 39.05          | 40.74           |
| 60               | 126.48                | 0.23             | 0.99          | 0.37            | 1.22             | 1.30           | 30.40             | 2.45            | 8.31            | 11.11            | 29.66          | 31.68           |
| 64               | 84.79                 | 0.30             | 0.81          | 0.34            | 2.07             | 1.70           | 21.69             | 1.82            | 11.33           | 12.83            | 21.11          | 24.70           |
| 68               | 35.99                 | 0.46             | 1.66          | 0.85            | 4.01             | 6.73           | 18.29             | 1.62            | 19.27           | 21.12            | 18.09          | 27.81           |

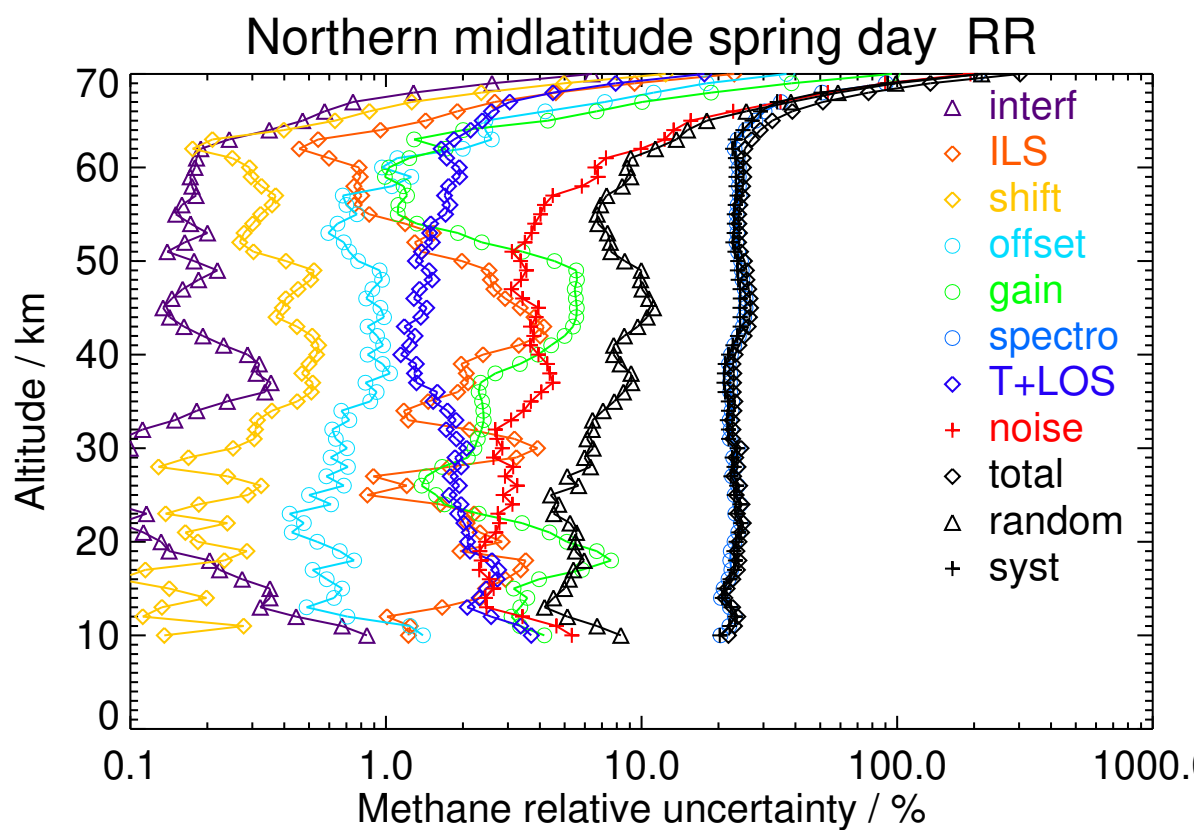

**Figure S45.** V8R\_CH4\_261 Northern midlatitude spring day

**Table S46.** Methane error budget for Northern midlatitude spring night. All uncertainties are  $1\sigma$ .

| altitude<br>(km) | mean target<br>(ppbv) | interf<br>(ppbv) | ILS<br>(ppbv) | shift<br>(ppbv) | offset<br>(ppbv) | gain<br>(ppbv) | spectro<br>(ppbv) | T+LOS<br>(ppbv) | noise<br>(ppbv) | random<br>(ppbv) | syst<br>(ppbv) | total<br>(ppbv) |
|------------------|-----------------------|------------------|---------------|-----------------|------------------|----------------|-------------------|-----------------|-----------------|------------------|----------------|-----------------|
| 12               | 1831.94               | 8.71             | 15.87         | 2.08            | 16.42            | 52.67          | 406.14            | 49.46           | 68.65           | 93.40            | 408.36         | 418.91          |
| 15               | 1663.92               | 6.16             | 39.44         | 2.60            | 11.72            | 51.22          | 338.50            | 40.94           | 44.81           | 75.67            | 341.91         | 350.18          |
| 18               | 1579.18               | 3.39             | 46.13         | 3.19            | 10.51            | 107.01         | 359.58            | 35.55           | 35.90           | 91.41            | 370.41         | 381.52          |
| 21               | 1330.25               | 1.46             | 35.02         | 2.69            | 5.98             | 58.83          | 326.91            | 26.54           | 33.99           | 73.84            | 328.65         | 336.84          |
| 24               | 1176.24               | 1.09             | 16.97         | 2.10            | 6.36             | 28.61          | 279.96            | 21.87           | 34.62           | 55.96            | 279.42         | 284.96          |
| 27               | 1110.07               | 0.87             | 10.86         | 2.67            | 6.70             | 13.57          | 257.44            | 20.71           | 33.65           | 54.29            | 255.43         | 261.14          |
| 30               | 1005.99               | 0.77             | 39.82         | 2.08            | 6.61             | 17.70          | 235.50            | 20.68           | 27.93           | 49.40            | 237.01         | 242.11          |
| 33               | 740.02                | 1.47             | 9.04          | 3.13            | 5.29             | 16.88          | 165.80            | 12.94           | 22.54           | 42.54            | 163.59         | 169.03          |
| 36               | 492.56                | 1.64             | 12.39         | 2.56            | 4.69             | 12.52          | 113.83            | 7.82            | 19.32           | 42.22            | 109.32         | 117.19          |
| 39               | 382.28                | 1.19             | 10.60         | 1.86            | 3.86             | 12.93          | 85.73             | 5.28            | 16.35           | 33.23            | 82.70          | 89.13           |
| 42               | 342.26                | 0.59             | 12.59         | 1.69            | 3.33             | 17.96          | 82.76             | 4.76            | 13.15           | 33.41            | 80.15          | 86.83           |
| 45               | 262.88                | 0.35             | 8.01          | 1.06            | 2.38             | 13.73          | 65.34             | 3.85            | 10.58           | 31.06            | 60.76          | 68.24           |
| 48               | 243.51                | 0.30             | 4.98          | 0.86            | 2.04             | 10.20          | 57.37             | 3.43            | 8.09            | 20.59            | 55.48          | 59.18           |
| 52               | 203.90                | 0.21             | 1.58          | 0.56            | 1.46             | 5.46           | 47.18             | 2.96            | 6.73            | 13.18            | 46.27          | 48.11           |
| 56               | 172.24                | 0.25             | 1.41          | 0.57            | 1.30             | 2.46           | 41.46             | 2.93            | 7.08            | 11.25            | 40.75          | 42.28           |
| 60               | 138.98                | 0.27             | 1.00          | 0.49            | 1.60             | 1.95           | 34.72             | 2.83            | 9.29            | 11.81            | 34.18          | 36.16           |
| 64               | 86.17                 | 0.28             | 0.52          | 0.38            | 2.61             | 1.06           | 23.24             | 2.01            | 12.99           | 14.32            | 22.73          | 26.86           |
| 68               | 48.06                 | 0.45             | 1.22          | 0.96            | 4.02             | 5.64           | 20.97             | 1.90            | 19.80           | 22.21            | 19.81          | 29.76           |

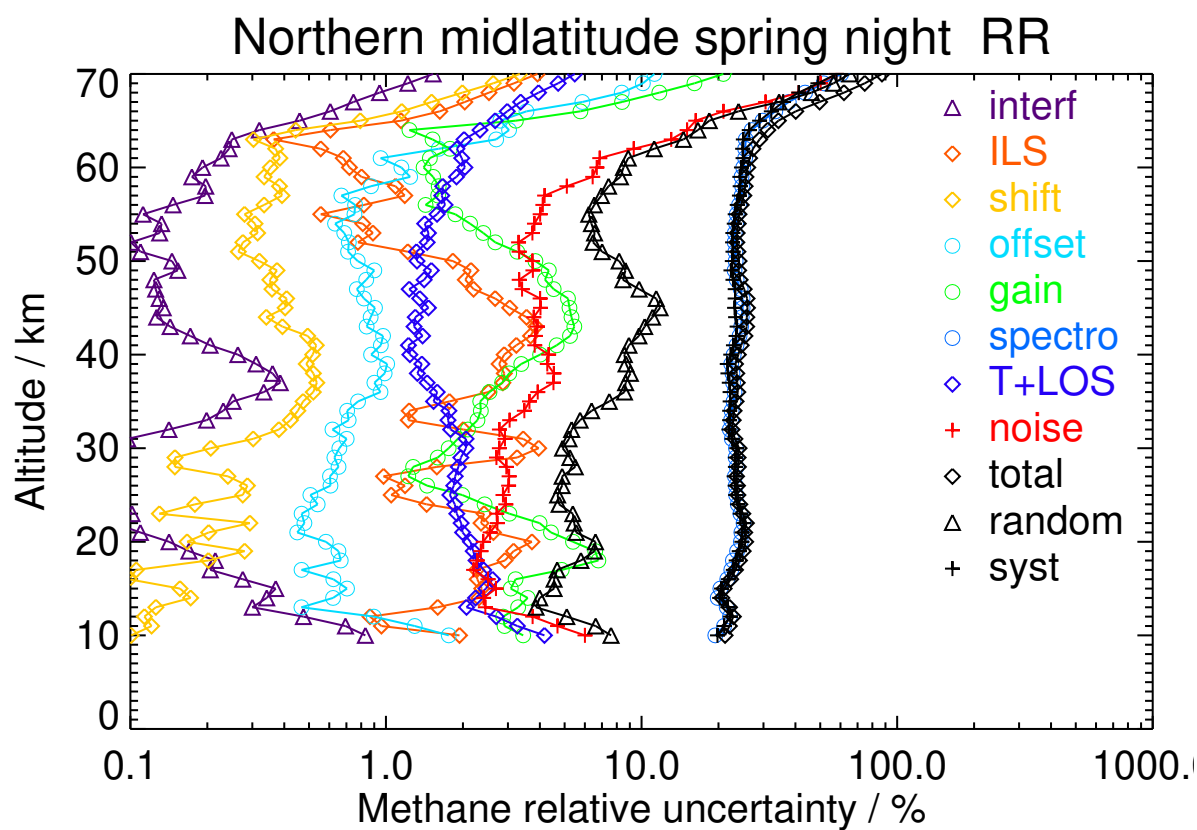

**Figure S46.** V8R\_CH4\_261 Northern midlatitude spring night

**Table S47.** Methane error budget for Northern midlatitude summer day. All uncertainties are  $1\sigma$ .

| altitude (km) | mean target (ppbv) | interf (ppbv) | ILS (ppbv) | shift (ppbv) | offset (ppbv) | gain (ppbv) | spectro (ppbv) | T+LOS (ppbv) | noise (ppbv) | random (ppbv) | syst (ppbv) | total (ppbv) |
|---------------|--------------------|---------------|------------|--------------|---------------|-------------|----------------|--------------|--------------|---------------|-------------|--------------|
| 12            | 1979.46            | 7.43          | 26.08      | 1.73         | 11.51         | 73.08       | 432.96         | 47.32        | 53.54        | 74.11         | 439.63      | 445.84       |
| 15            | 1943.59            | 7.04          | 89.81      | 3.23         | 14.77         | 54.42       | 421.57         | 50.90        | 57.24        | 88.73         | 432.46      | 441.47       |
| 18            | 1862.12            | 4.25          | 35.11      | 2.62         | 13.59         | 61.33       | 439.47         | 53.12        | 48.06        | 88.00         | 442.40      | 451.07       |
| 21            | 1489.38            | 2.05          | 53.33      | 2.43         | 4.79          | 11.56       | 363.71         | 39.23        | 43.88        | 66.18         | 366.58      | 372.50       |
| 24            | 1255.82            | 1.10          | 17.57      | 0.84         | 4.83          | 20.51       | 303.57         | 20.30        | 30.02        | 42.95         | 303.93      | 306.96       |
| 27            | 1080.49            | 0.99          | 16.94      | 3.51         | 7.52          | 13.09       | 249.89         | 20.86        | 37.33        | 48.40         | 249.92      | 254.56       |
| 30            | 1132.70            | 1.15          | 46.85      | 1.45         | 5.42          | 23.63       | 263.35         | 17.98        | 23.79        | 35.89         | 267.84      | 270.24       |
| 33            | 918.77             | 0.84          | 8.97       | 4.13         | 5.72          | 22.90       | 191.57         | 13.37        | 22.02        | 36.44         | 191.55      | 194.98       |
| 36            | 742.26             | 2.19          | 9.51       | 3.76         | 5.20          | 16.92       | 153.07         | 9.22         | 18.82        | 31.73         | 152.59      | 155.86       |
| 39            | 511.21             | 1.91          | 15.26      | 2.50         | 4.21          | 15.77       | 110.90         | 6.29         | 15.81        | 27.67         | 111.05      | 114.45       |
| 42            | 413.41             | 0.88          | 17.70      | 3.02         | 4.01          | 22.58       | 98.50          | 5.37         | 13.17        | 28.79         | 99.62       | 103.70       |
| 45            | 362.97             | 0.53          | 18.50      | 1.63         | 3.31          | 22.98       | 92.92          | 5.03         | 11.51        | 34.35         | 92.17       | 98.37        |
| 48            | 279.19             | 0.41          | 8.50       | 1.49         | 2.42          | 13.66       | 71.65          | 4.04         | 9.30         | 35.33         | 65.24       | 74.19        |
| 52            | 275.75             | 0.46          | 3.43       | 1.19         | 1.87          | 6.76        | 67.59          | 3.91         | 7.75         | 29.63         | 61.87       | 68.60        |
| 56            | 240.66             | 0.48          | 3.44       | 0.73         | 1.43          | 2.55        | 59.65          | 4.16         | 8.08         | 26.40         | 54.45       | 60.51        |
| 60            | 216.66             | 0.38          | 4.43       | 0.68         | 1.52          | 2.41        | 51.64          | 4.38         | 10.35        | 19.53         | 49.39       | 53.11        |
| 64            | 221.89             | 0.46          | 1.72       | 0.70         | 2.93          | 2.38        | 54.24          | 4.24         | 15.19        | 21.52         | 52.40       | 56.65        |
| 68            | 212.21             | 0.68          | 5.47       | 1.59         | 4.68          | 8.29        | 57.38          | 3.84         | 25.07        | 30.01         | 56.21       | 63.71        |

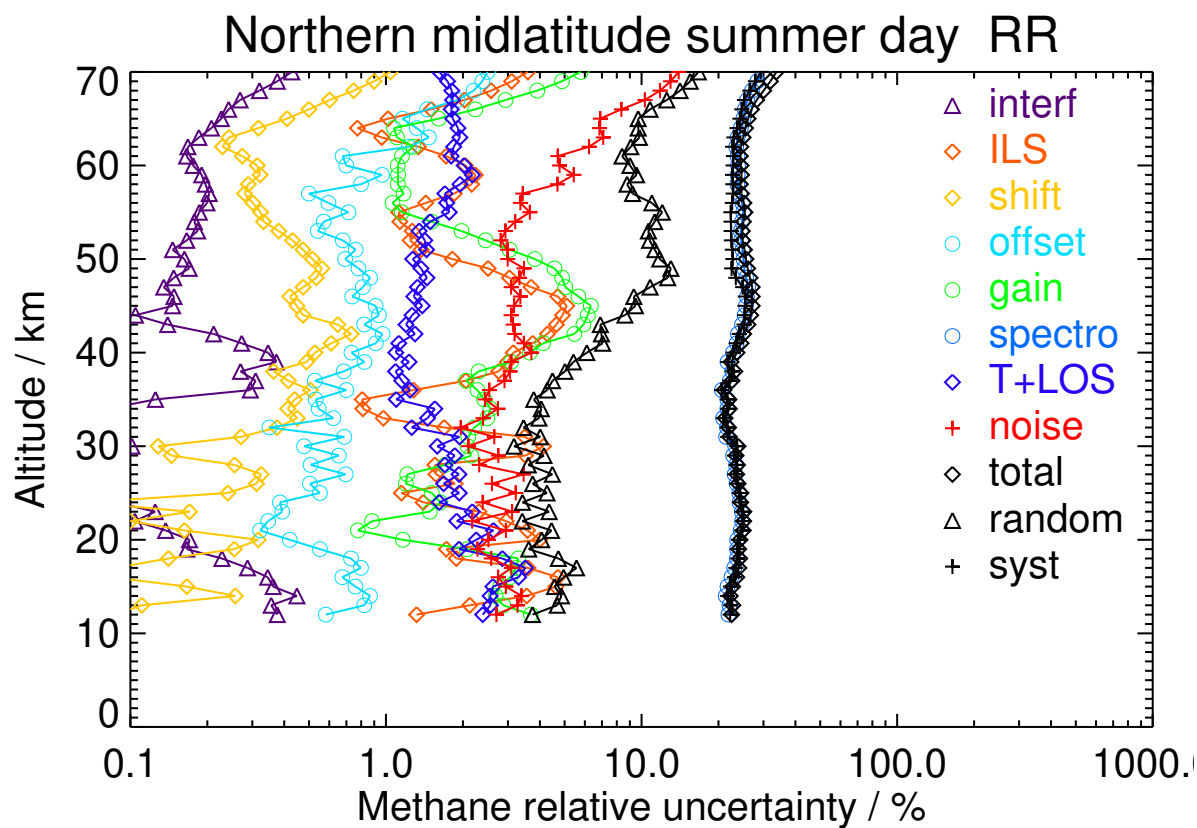

**Figure S47.** V8R\_CH4\_261 Northern midlatitude summer day



**Table S48.** Methane error budget for Northern midlatitude summer night. All uncertainties are  $1\sigma$ .

| altitude<br>(km) | mean target<br>(ppbv) | interf<br>(ppbv) | ILS<br>(ppbv) | shift<br>(ppbv) | offset<br>(ppbv) | gain<br>(ppbv) | spectro<br>(ppbv) | T+LOS<br>(ppbv) | noise<br>(ppbv) | random<br>(ppbv) | syst<br>(ppbv) | total<br>(ppbv) |
|------------------|-----------------------|------------------|---------------|-----------------|------------------|----------------|-------------------|-----------------|-----------------|------------------|----------------|-----------------|
| 12               | 1991.42               | 9.34             | 24.59         | 2.01            | 19.21            | 77.23          | 415.79            | 61.87           | 78.47           | 115.25           | 420.26         | 435.77          |
| 15               | 1909.28               | 8.14             | 64.37         | 3.42            | 15.03            | 48.00          | 353.58            | 50.74           | 60.03           | 91.82            | 359.89         | 371.42          |
| 18               | 1767.91               | 4.15             | 26.54         | 2.57            | 7.00             | 34.81          | 384.57            | 37.93           | 41.28           | 74.00            | 384.12         | 391.18          |
| 21               | 1476.72               | 2.12             | 59.62         | 1.91            | 5.64             | 11.61          | 364.95            | 36.73           | 40.93           | 63.40            | 368.67         | 374.08          |
| 24               | 1258.15               | 1.10             | 21.34         | 1.05            | 5.40             | 20.10          | 306.50            | 22.38           | 31.72           | 46.34            | 306.91         | 310.39          |
| 27               | 1104.42               | 0.88             | 15.58         | 3.35            | 6.88             | 15.80          | 252.96            | 21.13           | 34.28           | 47.35            | 252.82         | 257.22          |
| 30               | 1097.42               | 1.14             | 44.80         | 1.53            | 5.46             | 20.61          | 250.31            | 19.08           | 24.11           | 38.33            | 254.16         | 257.04          |
| 33               | 907.92                | 1.14             | 14.33         | 4.12            | 5.43             | 19.59          | 190.29            | 14.31           | 21.79           | 39.94            | 189.56         | 193.72          |
| 36               | 732.22                | 2.20             | 14.43         | 3.61            | 4.98             | 12.78          | 154.97            | 10.04           | 19.25           | 34.71            | 153.94         | 157.80          |
| 39               | 479.72                | 1.80             | 13.75         | 2.69            | 4.01             | 11.45          | 104.49            | 6.73            | 16.60           | 30.34            | 103.27         | 107.64          |
| 42               | 396.20                | 0.81             | 13.21         | 2.09            | 3.49             | 17.50          | 89.45             | 5.19            | 13.25           | 31.65            | 87.74          | 93.28           |
| 45               | 347.28                | 0.47             | 10.28         | 1.34            | 2.89             | 18.47          | 81.26             | 4.89            | 11.00           | 28.99            | 79.78          | 84.88           |
| 48               | 330.99                | 0.40             | 7.34          | 1.73            | 2.49             | 14.92          | 77.37             | 4.46            | 8.90            | 29.63            | 74.12          | 79.82           |
| 52               | 266.54                | 0.39             | 3.96          | 1.42            | 1.74             | 7.15           | 66.82             | 4.04            | 7.92            | 33.12            | 59.32          | 67.94           |
| 56               | 216.16                | 0.30             | 2.35          | 0.67            | 1.44             | 2.76           | 53.24             | 4.08            | 8.02            | 21.63            | 49.63          | 54.14           |
| 60               | 216.84                | 0.35             | 3.53          | 0.56            | 1.68             | 2.90           | 52.91             | 4.37            | 10.50           | 19.16            | 50.86          | 54.35           |
| 64               | 189.53                | 0.40             | 1.17          | 0.67            | 2.89             | 2.17           | 50.66             | 4.09            | 14.64           | 21.79            | 48.35          | 53.03           |
| 68               | 187.40                | 0.65             | 4.02          | 1.78            | 4.44             | 7.76           | 54.31             | 4.55            | 23.81           | 28.94            | 52.91          | 60.31           |

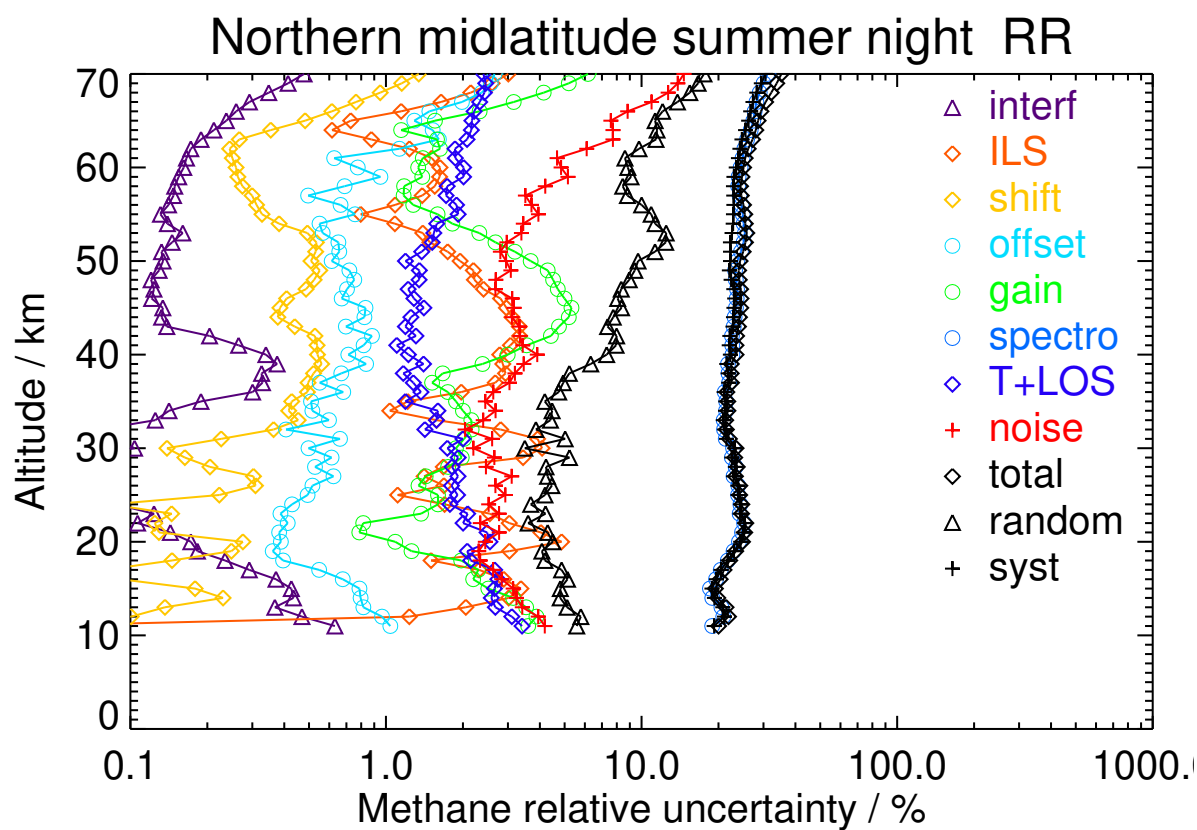

**Figure S48.** V8R\_CH4\_261 Northern midlatitude summer night

**Table S49.** Methane error budget for Northern midlatitude autumn day. All uncertainties are  $1\sigma$ .

| altitude<br>(km) | mean target<br>(ppbv) | interf<br>(ppbv) | ILS<br>(ppbv) | shift<br>(ppbv) | offset<br>(ppbv) | gain<br>(ppbv) | spectro<br>(ppbv) | T+LOS<br>(ppbv) | noise<br>(ppbv) | random<br>(ppbv) | syst<br>(ppbv) | total<br>(ppbv) |
|------------------|-----------------------|------------------|---------------|-----------------|------------------|----------------|-------------------|-----------------|-----------------|------------------|----------------|-----------------|
| 12               | 1915.65               | 6.24             | 25.02         | 1.43            | 11.14            | 67.91          | 408.48            | 42.94           | 50.29           | 68.62            | 414.64         | 420.28          |
| 15               | 1857.96               | 6.73             | 71.80         | 2.68            | 18.33            | 58.23          | 406.63            | 55.03           | 68.26           | 111.47           | 411.76         | 426.58          |
| 18               | 1789.51               | 2.84             | 29.60         | 2.73            | 9.44             | 62.68          | 415.69            | 41.77           | 39.96           | 76.33            | 418.60         | 425.50          |
| 21               | 1470.25               | 1.71             | 70.07         | 3.04            | 6.01             | 13.50          | 369.46            | 35.10           | 40.98           | 66.17            | 374.40         | 380.20          |
| 24               | 1238.53               | 1.12             | 29.55         | 1.72            | 5.66             | 14.79          | 301.38            | 21.44           | 30.94           | 48.80            | 301.65         | 305.57          |
| 27               | 1082.13               | 0.88             | 25.15         | 3.32            | 8.45             | 11.93          | 259.18            | 22.61           | 41.11           | 53.87            | 259.48         | 265.02          |
| 30               | 1080.83               | 0.95             | 42.10         | 1.01            | 5.89             | 20.36          | 250.83            | 19.25           | 27.15           | 42.20            | 253.90         | 257.38          |
| 33               | 948.92                | 0.79             | 14.18         | 4.49            | 7.19             | 20.98          | 204.63            | 14.70           | 27.61           | 44.52            | 203.92         | 208.72          |
| 36               | 878.11                | 1.93             | 7.62          | 3.41            | 6.71             | 18.71          | 183.45            | 11.10           | 25.00           | 40.07            | 182.39         | 186.74          |
| 39               | 673.92                | 2.33             | 14.48         | 3.79            | 5.83             | 15.55          | 139.40            | 8.38            | 22.96           | 41.33            | 137.21         | 143.30          |
| 42               | 627.97                | 1.55             | 18.53         | 2.82            | 5.44             | 23.40          | 130.31            | 7.30            | 20.35           | 36.78            | 130.48         | 135.57          |
| 45               | 492.58                | 0.49             | 19.15         | 1.49            | 4.57             | 27.87          | 113.89            | 7.29            | 16.69           | 34.39            | 115.27         | 120.29          |
| 48               | 412.56                | 0.56             | 13.75         | 2.34            | 4.03             | 21.60          | 93.58             | 7.06            | 13.61           | 25.36            | 95.01          | 98.34           |
| 52               | 346.00                | 0.40             | 4.18          | 1.57            | 2.66             | 9.31           | 76.18             | 6.03            | 11.02           | 18.72            | 75.67          | 77.95           |
| 56               | 296.41                | 0.42             | 3.20          | 0.78            | 1.90             | 2.52           | 66.73             | 6.24            | 11.07           | 14.77            | 66.46          | 68.08           |
| 60               | 257.11                | 0.42             | 3.45          | 0.55            | 1.96             | 2.11           | 59.53             | 6.00            | 13.11           | 16.34            | 59.20          | 61.42           |
| 64               | 213.35                | 0.41             | 1.09          | 0.60            | 3.12             | 2.42           | 51.52             | 4.91            | 16.13           | 20.50            | 50.35          | 54.37           |
| 68               | 136.62                | 0.44             | 2.95          | 0.86            | 4.46             | 5.64           | 42.74             | 3.95            | 23.29           | 27.36            | 41.20          | 49.46           |

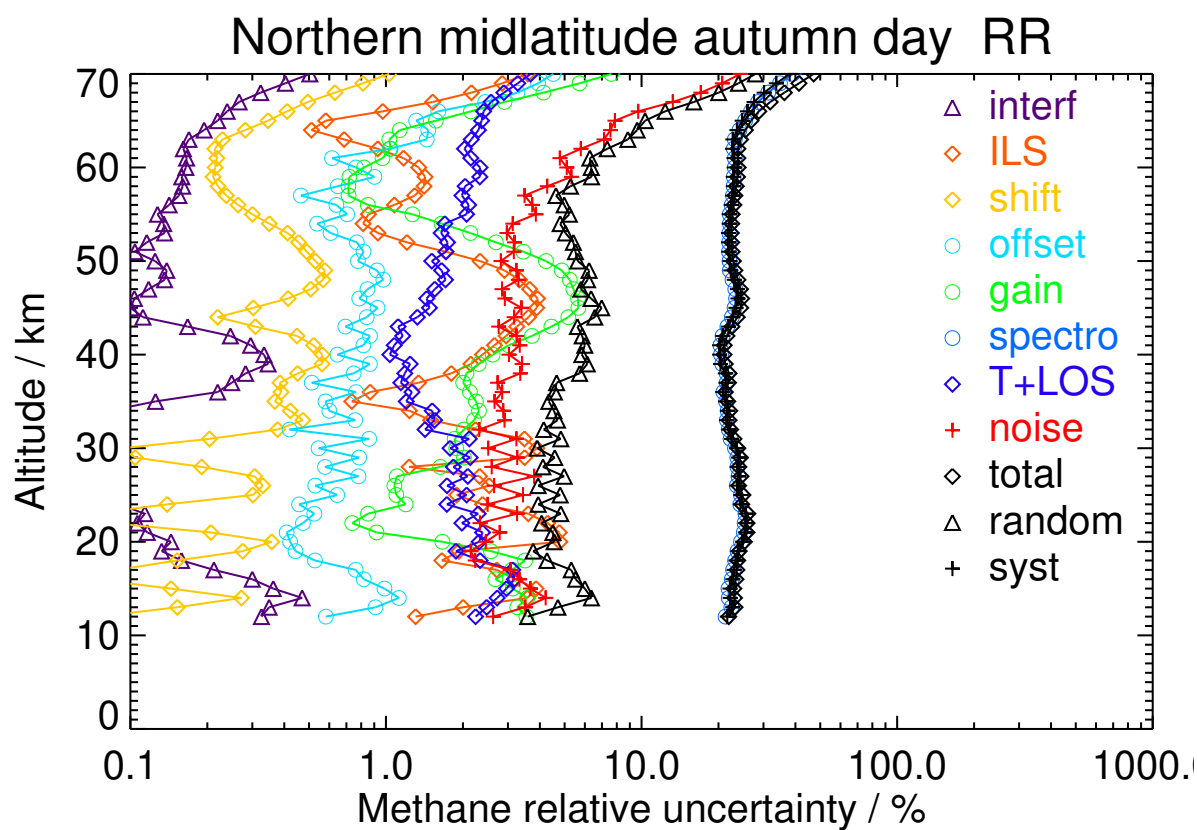

**Figure S49.** V8R\_CH4\_261 Northern midlatitude autumn day

**Table S50.** Methane error budget for Northern midlatitude autumn night. All uncertainties are  $1\sigma$ .

| altitude (km) | mean target (ppbv) | interf (ppbv) | ILS (ppbv) | shift (ppbv) | offset (ppbv) | gain (ppbv) | spectro (ppbv) | T+LOS (ppbv) | noise (ppbv) | random (ppbv) | syst (ppbv) | total (ppbv) |
|---------------|--------------------|---------------|------------|--------------|---------------|-------------|----------------|--------------|--------------|---------------|-------------|--------------|
| 12            | 1800.86            | 7.70          | 29.65      | 1.68         | 23.50         | 58.61       | 397.04         | 57.03        | 86.49        | 107.13        | 402.28      | 416.30       |
| 15            | 1877.60            | 6.13          | 59.23      | 2.09         | 18.93         | 54.32       | 380.71         | 56.57        | 66.92        | 105.56        | 385.15      | 399.35       |
| 18            | 1769.69            | 2.71          | 25.59      | 2.96         | 8.37          | 58.50       | 392.80         | 36.70        | 37.46        | 68.08         | 395.69      | 401.50       |
| 21            | 1446.90            | 1.66          | 51.13      | 2.37         | 6.04          | 35.92       | 359.78         | 32.24        | 40.32        | 75.18         | 361.12      | 368.86       |
| 24            | 1214.99            | 1.05          | 29.49      | 2.10         | 5.71          | 16.40       | 295.56         | 21.81        | 32.44        | 52.08         | 295.55      | 300.10       |
| 27            | 1083.36            | 0.86          | 23.31      | 2.89         | 7.95          | 13.05       | 258.18         | 21.89        | 38.55        | 56.05         | 257.42      | 263.45       |
| 30            | 1020.62            | 0.74          | 40.21      | 1.35         | 5.97          | 19.25       | 239.26         | 19.46        | 26.80        | 48.01         | 240.96      | 245.70       |
| 33            | 896.43             | 1.05          | 11.85      | 4.23         | 6.71          | 17.56       | 197.06         | 14.88        | 26.33        | 49.83         | 194.36      | 200.65       |
| 36            | 740.12             | 1.86          | 7.05       | 3.38         | 6.27          | 15.30       | 164.31         | 10.51        | 23.89        | 51.78         | 159.17      | 167.38       |
| 39            | 620.08             | 2.15          | 15.99      | 3.71         | 5.63          | 17.96       | 141.21         | 8.35         | 21.75        | 53.38         | 135.14      | 145.30       |
| 42            | 511.17             | 1.10          | 17.91      | 2.37         | 5.00          | 23.30       | 120.33         | 6.86         | 18.38        | 42.85         | 118.00      | 125.54       |
| 45            | 452.71             | 0.47          | 15.78      | 1.51         | 4.25          | 25.60       | 108.17         | 6.95         | 15.15        | 29.50         | 109.70      | 113.60       |
| 48            | 370.54             | 0.40          | 12.12      | 1.96         | 3.24          | 17.85       | 87.75          | 5.84         | 11.77        | 20.19         | 89.13       | 91.39        |
| 52            | 318.56             | 0.34          | 3.68       | 1.40         | 2.23          | 7.89        | 72.36          | 5.10         | 9.78         | 16.61         | 71.86       | 73.76        |
| 56            | 283.66             | 0.37          | 2.75       | 0.75         | 1.76          | 2.68        | 65.48          | 5.38         | 10.22        | 13.51         | 65.25       | 66.63        |
| 60            | 252.38             | 0.41          | 3.01       | 0.63         | 1.93          | 1.81        | 59.77          | 5.60         | 12.52        | 14.93         | 59.62       | 61.46        |
| 64            | 195.57             | 0.38          | 1.13       | 0.57         | 2.96          | 1.92        | 48.86          | 4.49         | 15.37        | 17.88         | 48.35       | 51.55        |
| 68            | 137.76             | 0.45          | 2.13       | 0.99         | 4.28          | 6.03        | 41.69          | 4.24         | 22.27        | 25.66         | 40.67       | 48.09        |

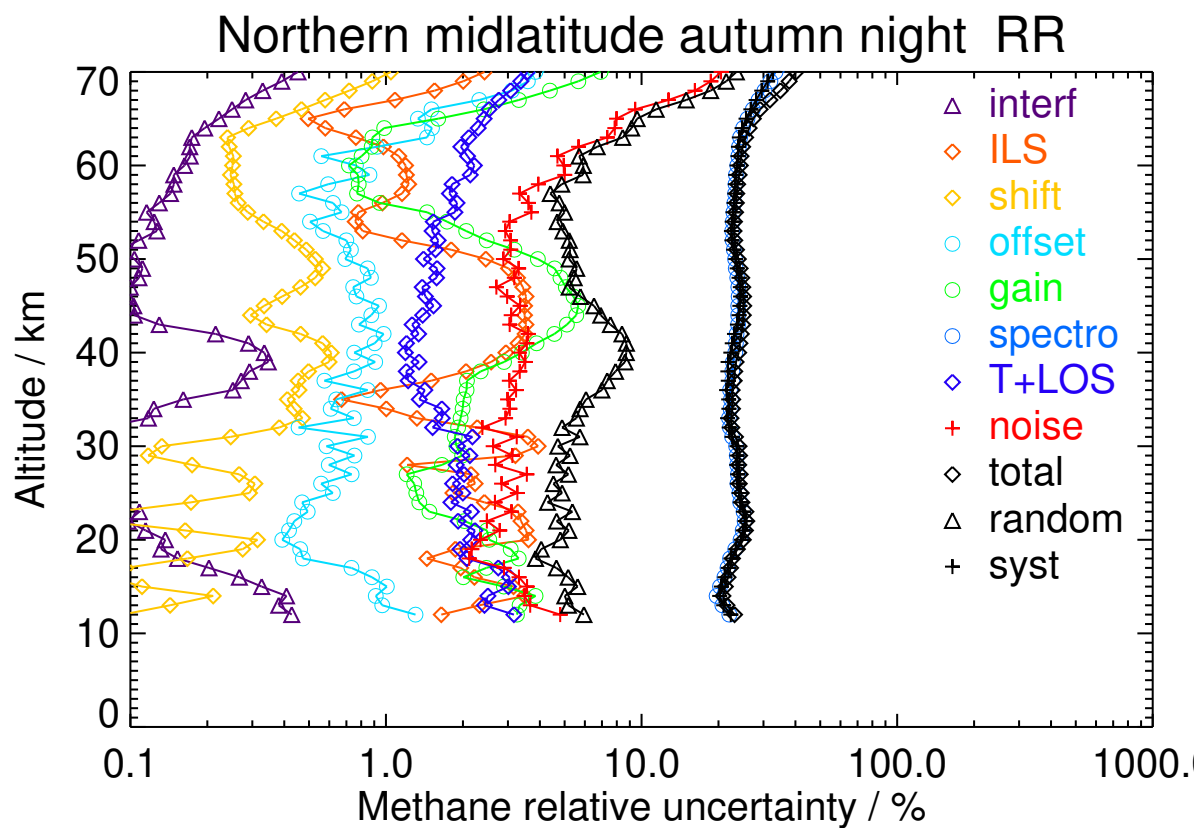

**Figure S50.** V8R\_CH4\_261 Northern midlatitude autumn night

**Table S51.** Methane error budget for Tropics day. All uncertainties are  $1\sigma$ .

| altitude<br>(km) | mean target<br>(ppbv) | interf<br>(ppbv) | ILS<br>(ppbv) | shift<br>(ppbv) | offset<br>(ppbv) | gain<br>(ppbv) | spectro<br>(ppbv) | T+LOS<br>(ppbv) | noise<br>(ppbv) | random<br>(ppbv) | syst<br>(ppbv) | total<br>(ppbv) |
|------------------|-----------------------|------------------|---------------|-----------------|------------------|----------------|-------------------|-----------------|-----------------|------------------|----------------|-----------------|
| 12               | 1895.22               | 7.11             | 17.47         | 2.29            | 10.88            | 71.88          | 406.97            | 47.09           | 52.68           | 78.88            | 412.36         | 419.84          |
| 15               | 2062.95               | 9.46             | 103.32        | 2.77            | 16.50            | 79.99          | 412.04            | 72.11           | 63.41           | 112.24           | 428.77         | 443.22          |
| 18               | 1940.08               | 8.33             | 56.40         | 2.50            | 16.18            | 61.17          | 391.58            | 64.39           | 61.13           | 98.38            | 398.49         | 410.46          |
| 21               | 1668.41               | 4.47             | 34.62         | 1.52            | 5.33             | 19.04          | 395.51            | 46.60           | 48.24           | 76.08            | 395.92         | 403.16          |
| 24               | 1582.60               | 1.18             | 7.71          | 1.74            | 5.31             | 32.71          | 392.35            | 27.20           | 38.74           | 68.62            | 390.68         | 396.66          |
| 27               | 1503.16               | 1.40             | 10.71         | 2.49            | 5.95             | 21.36          | 349.78            | 26.80           | 38.95           | 55.35            | 349.48         | 353.83          |
| 30               | 1474.73               | 0.71             | 48.09         | 3.11            | 6.38             | 32.20          | 341.94            | 25.54           | 31.06           | 52.99            | 345.16         | 349.20          |
| 33               | 1367.62               | 0.78             | 12.11         | 2.46            | 6.94             | 32.09          | 286.44            | 19.76           | 29.21           | 49.61            | 286.47         | 290.73          |
| 36               | 1127.12               | 1.07             | 9.63          | 3.43            | 4.85             | 21.44          | 239.41            | 14.15           | 23.61           | 38.51            | 239.13         | 242.21          |
| 39               | 804.57                | 1.56             | 13.50         | 3.66            | 4.56             | 16.73          | 168.93            | 9.08            | 19.30           | 40.34            | 166.93         | 171.73          |
| 42               | 618.38                | 1.06             | 16.98         | 3.64            | 4.78             | 28.48          | 139.89            | 7.40            | 15.44           | 39.95            | 139.30         | 144.91          |
| 45               | 453.24                | 0.42             | 14.78         | 2.16            | 3.57             | 26.62          | 110.20            | 6.31            | 12.03           | 30.72            | 111.04         | 115.22          |
| 48               | 350.18                | 0.34             | 8.29          | 1.12            | 2.29             | 14.50          | 81.19             | 4.67            | 9.97            | 25.32            | 79.74          | 83.66           |
| 52               | 243.72                | 0.32             | 2.93          | 0.65            | 1.36             | 5.41           | 55.12             | 3.63            | 8.06            | 17.17            | 53.50          | 56.19           |
| 56               | 196.01                | 0.28             | 1.72          | 0.36            | 1.06             | 1.79           | 44.87             | 3.10            | 6.86            | 11.40            | 44.13          | 45.58           |
| 60               | 167.94                | 0.28             | 1.64          | 0.28            | 1.47             | 1.58           | 39.59             | 2.81            | 8.59            | 10.53            | 39.32          | 40.70           |
| 64               | 166.80                | 0.30             | 0.59          | 0.30            | 1.94             | 1.46           | 37.87             | 2.74            | 11.98           | 13.73            | 37.46          | 39.90           |
| 68               | 122.29                | 0.70             | 2.99          | 1.64            | 3.52             | 10.98          | 43.39             | 3.36            | 19.80           | 23.33            | 43.44          | 49.30           |

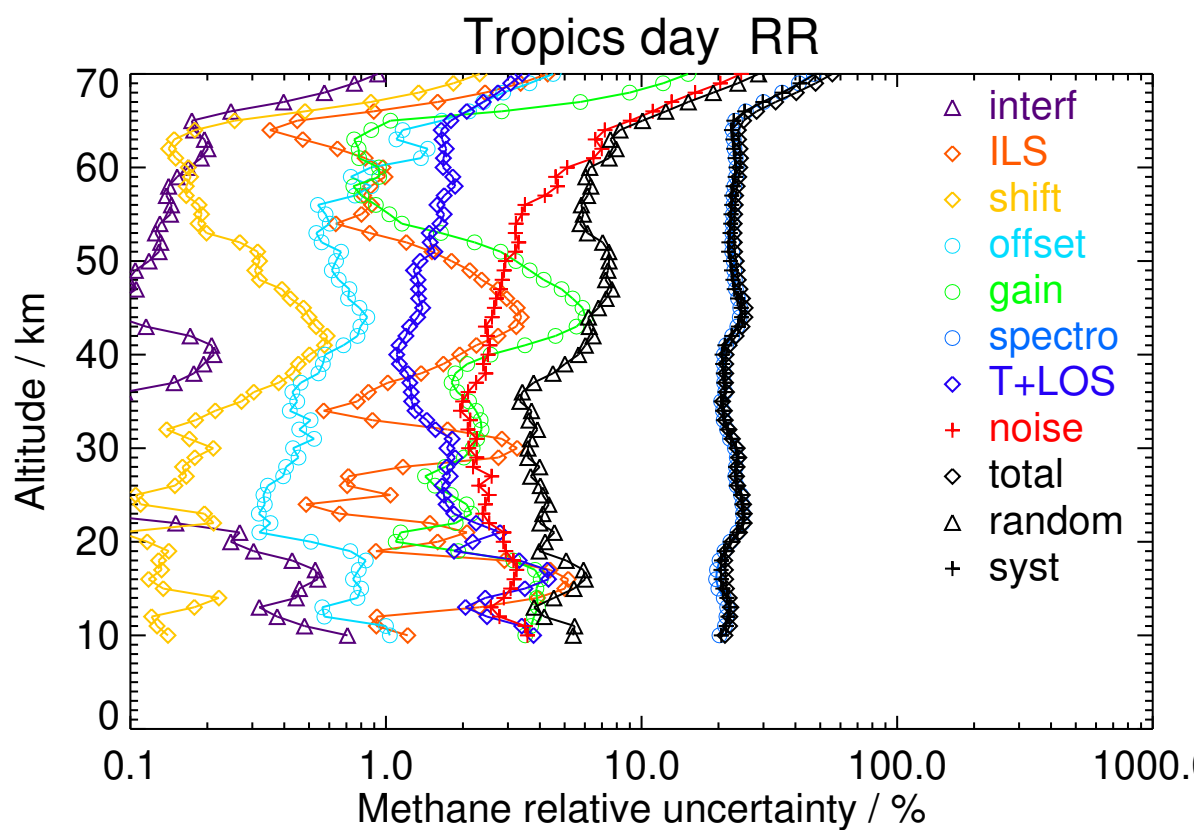

**Figure S51.** V8R\_CH4\_261 Tropics day

**Table S52.** Methane error budget for Tropics night. All uncertainties are  $1\sigma$ .

| altitude (km) | mean target (ppbv) | interf (ppbv) | ILS (ppbv) | shift (ppbv) | offset (ppbv) | gain (ppbv) | spectro (ppbv) | T+LOS (ppbv) | noise (ppbv) | random (ppbv) | syst (ppbv) | total (ppbv) |
|---------------|--------------------|---------------|------------|--------------|---------------|-------------|----------------|--------------|--------------|---------------|-------------|--------------|
| 12            | 1898.05            | 8.00          | 16.11      | 2.08         | 12.48         | 71.82       | 406.88         | 51.94        | 57.92        | 85.39         | 412.25      | 421.00       |
| 15            | 2080.55            | 9.37          | 88.50      | 2.98         | 15.95         | 75.72       | 408.44         | 81.73        | 64.15        | 116.10        | 421.96      | 437.64       |
| 18            | 1922.82            | 8.56          | 54.92      | 2.48         | 15.77         | 54.58       | 397.15         | 68.36        | 62.66        | 102.54        | 402.66      | 415.51       |
| 21            | 1679.24            | 4.68          | 39.96      | 2.11         | 5.57          | 17.47       | 409.37         | 51.29        | 49.80        | 81.32         | 409.93      | 417.92       |
| 24            | 1604.56            | 1.11          | 8.88       | 1.08         | 4.30          | 36.35       | 382.44         | 29.06        | 38.83        | 64.80         | 381.88      | 387.34       |
| 27            | 1487.33            | 1.34          | 10.57      | 2.40         | 6.02          | 23.24       | 354.90         | 27.90        | 37.52        | 59.72         | 353.93      | 358.93       |
| 30            | 1486.02            | 0.69          | 51.62      | 2.38         | 6.43          | 30.20       | 342.93         | 28.24        | 32.16        | 53.11         | 346.75      | 350.79       |
| 33            | 1388.88            | 0.70          | 17.63      | 3.14         | 6.49          | 32.09       | 296.26         | 21.09        | 28.96        | 46.70         | 297.09      | 300.74       |
| 36            | 1109.31            | 1.08          | 16.18      | 4.16         | 5.01          | 20.75       | 234.17         | 14.91        | 24.19        | 40.02         | 234.05      | 237.44       |
| 39            | 808.31             | 1.54          | 15.81      | 3.74         | 4.81          | 15.58       | 166.48         | 9.92         | 20.23        | 36.35         | 165.63      | 169.57       |
| 42            | 592.12             | 0.85          | 17.06      | 2.88         | 4.52          | 28.07       | 134.96         | 7.46         | 15.29        | 34.59         | 135.71      | 140.05       |
| 45            | 422.35             | 0.38          | 12.38      | 1.72         | 3.24          | 23.46       | 101.20         | 6.03         | 12.11        | 26.25         | 102.23      | 105.55       |
| 48            | 313.20             | 0.29          | 7.45       | 1.36         | 2.34          | 14.22       | 72.85          | 4.64         | 9.91         | 20.89         | 72.50       | 75.45        |
| 52            | 224.30             | 0.27          | 1.60       | 0.59         | 1.30          | 4.24        | 50.41          | 3.48         | 7.93         | 13.08         | 49.67       | 51.37        |
| 56            | 181.35             | 0.25          | 1.57       | 0.40         | 0.99          | 1.63        | 41.44          | 2.94         | 6.63         | 9.47          | 41.07       | 42.15        |
| 60            | 163.41             | 0.27          | 1.66       | 0.29         | 1.26          | 1.48        | 38.45          | 2.87         | 8.18         | 10.45         | 38.09       | 39.50        |
| 64            | 154.10             | 0.33          | 0.79       | 0.34         | 1.81          | 1.81        | 37.00          | 2.99         | 11.49        | 13.26         | 36.63       | 38.96        |
| 68            | 120.94             | 0.80          | 2.60       | 1.88         | 3.62          | 12.19       | 42.77          | 3.98         | 19.98        | 23.71         | 43.07       | 49.16        |

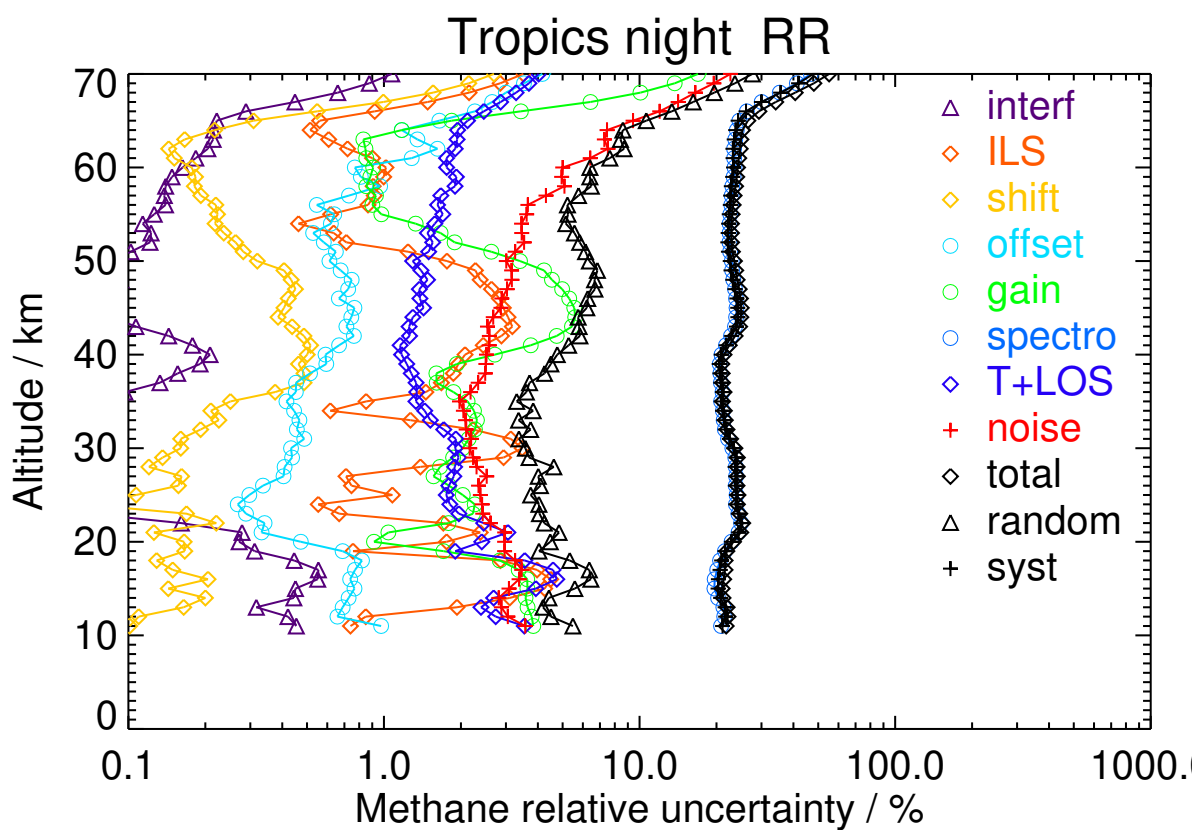

**Figure S52.** V8R\_CH4\_261 Tropics night

**Table S53.** Methane error budget for Southern midlatitude winter day. All uncertainties are  $1\sigma$ .

| altitude<br>(km) | mean target<br>(ppbv) | interf<br>(ppbv) | ILS<br>(ppbv) | shift<br>(ppbv) | offset<br>(ppbv) | gain<br>(ppbv) | spectro<br>(ppbv) | T+LOS<br>(ppbv) | noise<br>(ppbv) | random<br>(ppbv) | syst<br>(ppbv) | total<br>(ppbv) |
|------------------|-----------------------|------------------|---------------|-----------------|------------------|----------------|-------------------|-----------------|-----------------|------------------|----------------|-----------------|
| 9                | 1898.98               | 21.83            | 12.35         | 3.60            | 28.28            | 81.31          | 370.63            | 64.08           | 111.95          | 232.83           | 328.41         | 402.57          |
| 12               | 1806.19               | 6.00             | 37.07         | 1.51            | 7.16             | 60.15          | 402.76            | 37.23           | 47.31           | 70.78            | 407.32         | 413.43          |
| 15               | 1697.31               | 5.06             | 21.31         | 2.85            | 12.11            | 40.98          | 359.82            | 44.68           | 48.19           | 79.43            | 360.26         | 368.92          |
| 18               | 1587.80               | 3.34             | 29.37         | 3.37            | 7.42             | 84.97          | 382.90            | 35.58           | 39.64           | 77.55            | 389.35         | 397.00          |
| 21               | 1365.31               | 1.43             | 22.73         | 1.72            | 6.09             | 70.09          | 351.88            | 27.75           | 39.10           | 65.41            | 356.81         | 362.76          |
| 24               | 1207.62               | 1.04             | 11.98         | 1.89            | 7.59             | 38.61          | 293.30            | 24.24           | 43.28           | 59.76            | 294.30         | 300.30          |
| 27               | 1048.58               | 0.86             | 8.93          | 0.75            | 7.80             | 18.60          | 257.47            | 23.78           | 43.29           | 73.19            | 252.71         | 263.10          |
| 30               | 937.00                | 0.91             | 35.24         | 2.96            | 9.07             | 15.03          | 237.30            | 24.36           | 42.36           | 95.04            | 226.33         | 245.47          |
| 33               | 798.03                | 1.30             | 9.79          | 3.10            | 7.77             | 12.91          | 199.67            | 18.16           | 38.65           | 84.13            | 186.95         | 205.01          |
| 36               | 679.71                | 1.80             | 18.72         | 2.78            | 8.12             | 13.36          | 161.91            | 13.34           | 35.82           | 66.46            | 154.48         | 168.17          |
| 39               | 443.52                | 1.22             | 18.39         | 2.19            | 6.55             | 16.79          | 115.43            | 9.59            | 28.03           | 52.17            | 110.22         | 121.94          |
| 42               | 236.71                | 0.46             | 7.76          | 0.90            | 3.92             | 10.53          | 60.80             | 5.43            | 18.61           | 29.85            | 58.04          | 65.26           |
| 45               | 160.35                | 0.17             | 2.80          | 0.49            | 2.42             | 7.06           | 38.72             | 3.38            | 12.07           | 17.92            | 37.41          | 41.48           |
| 48               | 152.22                | 0.15             | 2.39          | 0.39            | 1.74             | 5.55           | 35.68             | 2.40            | 7.59            | 13.75            | 34.46          | 37.10           |
| 52               | 155.43                | 0.12             | 1.31          | 0.28            | 1.44             | 4.77           | 36.78             | 2.32            | 6.26            | 11.89            | 35.82          | 37.74           |
| 56               | 150.44                | 0.10             | 1.39          | 0.35            | 1.37             | 3.84           | 37.49             | 2.50            | 7.46            | 12.78            | 36.37          | 38.55           |
| 60               | 135.51                | 0.12             | 1.52          | 0.28            | 1.79             | 2.88           | 34.87             | 2.43            | 10.44           | 14.36            | 33.74          | 36.67           |
| 64               | 106.92                | 0.19             | 0.80          | 0.19            | 2.78             | 1.92           | 28.26             | 1.79            | 13.44           | 16.05            | 27.15          | 31.54           |
| 68               | 83.63                 | 0.22             | 1.81          | 0.69            | 4.26             | 1.68           | 26.14             | 1.75            | 21.07           | 24.12            | 23.95          | 33.99           |

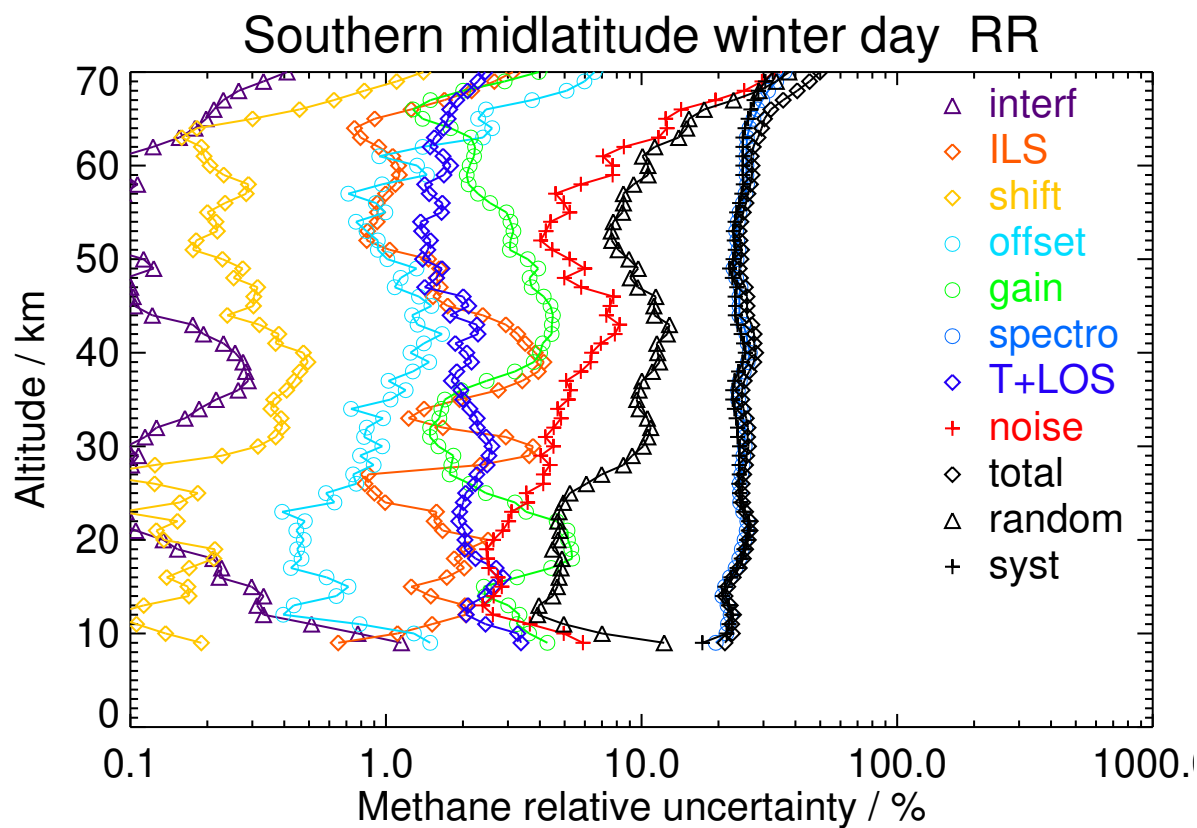

**Figure S53.** V8R\_CH4\_261 Southern midlatitude winter day

**Table S54.** Methane error budget for Southern midlatitude winter night. All uncertainties are  $1\sigma$ .

| altitude<br>(km) | mean target<br>(ppbv) | interf<br>(ppbv) | ILS<br>(ppbv) | shift<br>(ppbv) | offset<br>(ppbv) | gain<br>(ppbv) | spectro<br>(ppbv) | T+LOS<br>(ppbv) | noise<br>(ppbv) | random<br>(ppbv) | syst<br>(ppbv) | total<br>(ppbv) |
|------------------|-----------------------|------------------|---------------|-----------------|------------------|----------------|-------------------|-----------------|-----------------|------------------|----------------|-----------------|
| 9                | 1710.21               | 18.92            | 6.42          | 1.77            | 27.51            | 57.44          | 312.98            | 63.28           | 101.44          | 164.32           | 299.51         | 341.63          |
| 12               | 1838.01               | 6.64             | 31.89         | 1.37            | 6.07             | 56.69          | 386.83            | 35.21           | 41.88           | 71.64            | 389.64         | 396.17          |
| 15               | 1693.73               | 5.62             | 26.39         | 2.36            | 11.71            | 50.80          | 348.11            | 41.47           | 46.88           | 84.25            | 348.50         | 358.54          |
| 18               | 1611.63               | 3.15             | 51.82         | 2.08            | 10.53            | 121.44         | 316.15            | 40.42           | 38.78           | 86.05            | 336.51         | 347.34          |
| 21               | 1346.50               | 1.36             | 16.48         | 2.01            | 7.57             | 79.55          | 287.78            | 28.80           | 39.13           | 70.43            | 294.75         | 303.05          |
| 24               | 1187.35               | 0.89             | 12.60         | 1.73            | 6.09             | 38.22          | 265.71            | 22.10           | 37.07           | 58.07            | 265.99         | 272.26          |
| 27               | 1065.99               | 0.80             | 10.65         | 1.27            | 9.14             | 19.23          | 252.26            | 24.91           | 47.00           | 68.35            | 249.72         | 258.91          |
| 30               | 881.67                | 0.76             | 29.59         | 1.94            | 6.23             | 14.07          | 229.53            | 22.58           | 34.67           | 80.03            | 221.60         | 235.61          |
| 33               | 758.81                | 0.88             | 9.84          | 2.85            | 7.21             | 9.87           | 184.84            | 15.67           | 35.87           | 76.60            | 173.45         | 189.61          |
| 36               | 631.95                | 1.78             | 13.44         | 2.47            | 7.54             | 16.21          | 142.46            | 10.70           | 32.25           | 56.94            | 136.80         | 148.18          |
| 39               | 455.90                | 1.32             | 13.84         | 2.21            | 6.02             | 15.21          | 95.95             | 8.04            | 25.93           | 38.29            | 94.56          | 102.02          |
| 42               | 266.64                | 0.39             | 6.85          | 0.62            | 3.86             | 14.20          | 62.50             | 4.84            | 17.21           | 26.62            | 61.49          | 67.00           |
| 45               | 161.44                | 0.18             | 3.53          | 0.45            | 2.27             | 6.89           | 39.59             | 2.99            | 11.84           | 18.06            | 38.15          | 42.21           |
| 48               | 142.92                | 0.14             | 2.12          | 0.37            | 1.64             | 4.68           | 34.69             | 2.28            | 8.16            | 13.32            | 33.57          | 36.12           |
| 52               | 141.77                | 0.12             | 1.33          | 0.32            | 1.57             | 4.37           | 34.95             | 2.46            | 7.59            | 13.21            | 33.68          | 36.18           |
| 56               | 140.70                | 0.13             | 1.19          | 0.36            | 1.73             | 3.27           | 34.74             | 2.62            | 9.19            | 13.69            | 33.56          | 36.25           |
| 60               | 120.42                | 0.14             | 1.00          | 0.29            | 2.20             | 2.12           | 29.74             | 2.28            | 11.50           | 13.72            | 29.06          | 32.13           |
| 64               | 99.07                 | 0.19             | 0.60          | 0.25            | 2.93             | 1.50           | 24.58             | 1.82            | 14.44           | 16.17            | 23.79          | 28.77           |
| 68               | 76.34                 | 0.23             | 1.47          | 0.54            | 4.15             | 2.27           | 21.06             | 1.89            | 21.22           | 23.03            | 19.80          | 30.37           |

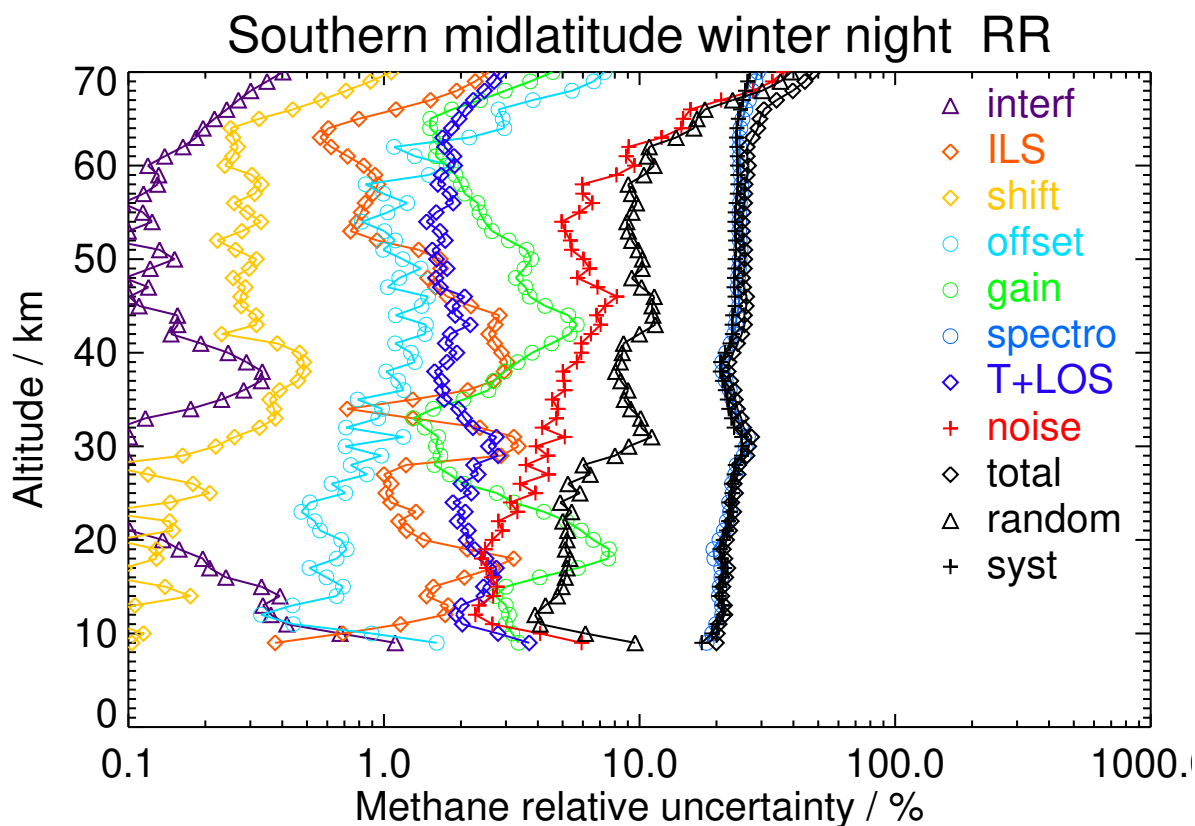

**Figure S54.** V8R\_CH4\_261 Southern midlatitude winter night



**Table S55.** Methane error budget for Southern midlatitude spring day. All uncertainties are  $1\sigma$ .

| altitude<br>(km) | mean target<br>(ppbv) | interf<br>(ppbv) | ILS<br>(ppbv) | shift<br>(ppbv) | offset<br>(ppbv) | gain<br>(ppbv) | spectro<br>(ppbv) | T+LOS<br>(ppbv) | noise<br>(ppbv) | random<br>(ppbv) | syst<br>(ppbv) | total<br>(ppbv) |
|------------------|-----------------------|------------------|---------------|-----------------|------------------|----------------|-------------------|-----------------|-----------------|------------------|----------------|-----------------|
| 9                | 1894.55               | 23.04            | 23.26         | 2.44            | 24.50            | 63.49          | 366.89            | 61.62           | 96.35           | 143.31           | 364.50         | 391.66          |
| 12               | 1782.24               | 9.69             | 43.39         | 2.08            | 6.74             | 56.59          | 402.54            | 39.30           | 44.44           | 92.81            | 402.71         | 413.27          |
| 15               | 1652.68               | 8.52             | 38.36         | 3.44            | 12.72            | 44.00          | 364.80            | 45.04           | 49.74           | 103.87           | 361.17         | 375.81          |
| 18               | 1472.92               | 3.29             | 48.07         | 3.60            | 7.71             | 70.65          | 363.52            | 33.56           | 35.61           | 122.60           | 356.22         | 376.73          |
| 21               | 1240.05               | 1.52             | 37.46         | 2.79            | 5.23             | 51.55          | 335.81            | 27.53           | 37.11           | 111.85           | 326.33         | 344.97          |
| 24               | 1322.32               | 1.00             | 20.86         | 1.53            | 6.29             | 30.17          | 335.68            | 21.11           | 30.31           | 66.47            | 333.19         | 339.76          |
| 27               | 1300.44               | 1.02             | 17.45         | 3.71            | 6.83             | 18.82          | 303.13            | 21.92           | 33.59           | 54.28            | 302.11         | 306.95          |
| 30               | 1273.64               | 0.94             | 44.57         | 4.09            | 5.79             | 24.23          | 292.15            | 21.87           | 25.29           | 51.93            | 293.93         | 298.48          |
| 33               | 1062.82               | 1.35             | 12.12         | 3.19            | 6.03             | 24.04          | 226.75            | 16.48           | 23.86           | 50.33            | 224.72         | 230.28          |
| 36               | 669.54                | 1.85             | 18.89         | 3.29            | 5.36             | 15.00          | 145.94            | 10.46           | 20.15           | 43.75            | 143.26         | 149.79          |
| 39               | 454.64                | 1.50             | 15.21         | 2.20            | 4.61             | 15.77          | 96.63             | 6.43            | 17.18           | 29.41            | 96.53          | 100.91          |
| 42               | 360.73                | 0.80             | 13.07         | 1.40            | 3.83             | 17.38          | 81.74             | 4.68            | 14.51           | 24.11            | 82.60          | 86.05           |
| 45               | 278.45                | 0.36             | 6.45          | 0.81            | 2.84             | 14.95          | 63.58             | 4.05            | 12.06           | 16.24            | 64.92          | 66.92           |
| 48               | 271.36                | 0.34             | 5.40          | 1.06            | 2.79             | 14.58          | 62.89             | 4.29            | 9.26            | 15.07            | 63.90          | 65.65           |
| 52               | 272.73                | 0.27             | 2.34          | 0.87            | 2.21             | 10.05          | 62.30             | 4.14            | 8.28            | 13.33            | 62.46          | 63.87           |
| 56               | 241.33                | 0.24             | 0.84          | 0.72            | 1.71             | 5.38           | 56.20             | 4.29            | 8.93            | 11.99            | 56.09          | 57.36           |
| 60               | 220.29                | 0.34             | 0.89          | 0.57            | 2.03             | 2.81           | 52.81             | 4.36            | 11.64           | 13.98            | 52.54          | 54.37           |
| 64               | 190.48                | 0.36             | 0.83          | 0.50            | 3.09             | 1.67           | 45.73             | 3.62            | 15.28           | 17.72            | 45.14          | 48.49           |
| 68               | 118.38                | 0.50             | 2.98          | 1.01            | 4.12             | 6.65           | 38.48             | 2.87            | 21.42           | 24.38            | 37.75          | 44.93           |

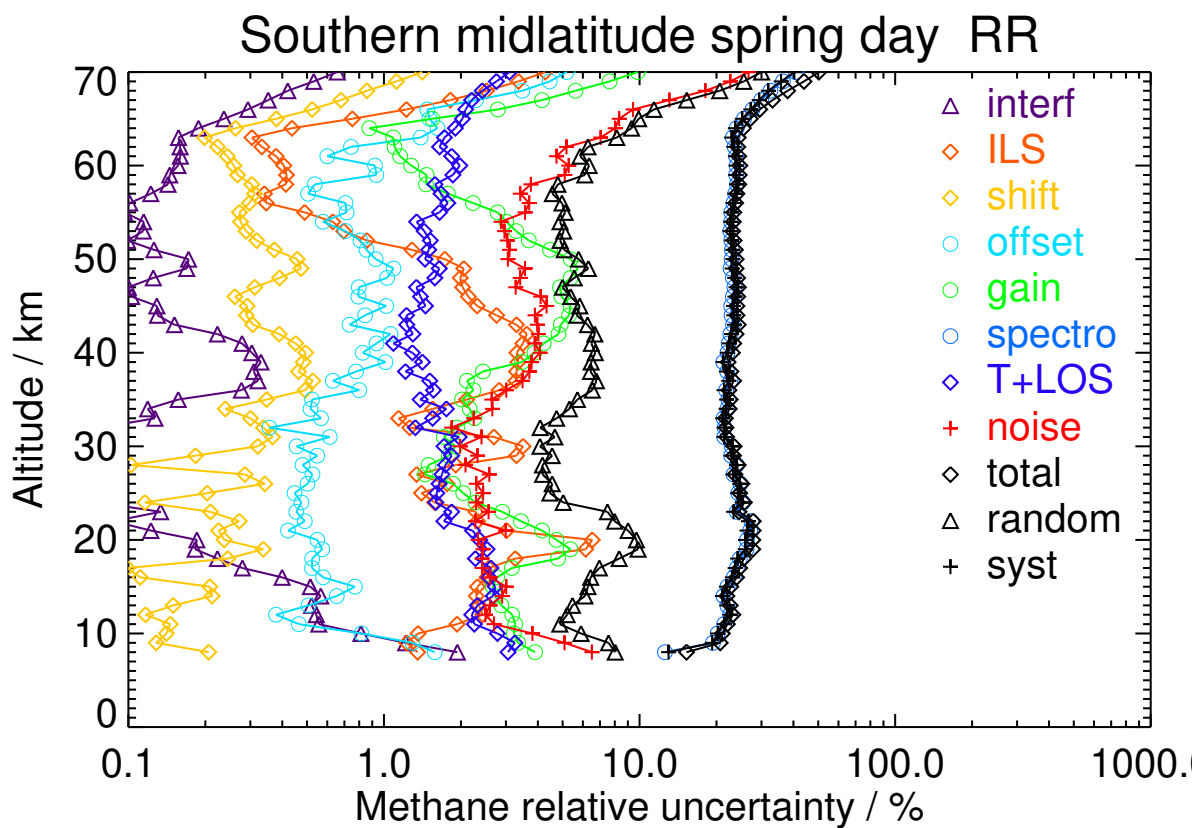

**Figure S55.** V8R\_CH4\_261 Southern midlatitude spring day

**Table S56.** Methane error budget for Southern midlatitude spring night. All uncertainties are  $1\sigma$ .

| altitude<br>(km) | mean target<br>(ppbv) | interf<br>(ppbv) | ILS<br>(ppbv) | shift<br>(ppbv) | offset<br>(ppbv) | gain<br>(ppbv) | spectro<br>(ppbv) | T+LOS<br>(ppbv) | noise<br>(ppbv) | random<br>(ppbv) | syst<br>(ppbv) | total<br>(ppbv) |
|------------------|-----------------------|------------------|---------------|-----------------|------------------|----------------|-------------------|-----------------|-----------------|------------------|----------------|-----------------|
| 9                | 1838.74               | 17.11            | 24.63         | 2.40            | 24.19            | 58.75          | 333.72            | 63.80           | 92.82           | 147.25           | 327.59         | 359.17          |
| 12               | 1851.12               | 7.71             | 70.98         | 1.92            | 7.76             | 75.55          | 387.34            | 40.50           | 46.51           | 90.49            | 395.62         | 405.84          |
| 15               | 1683.67               | 7.14             | 67.17         | 2.39            | 13.36            | 61.39          | 351.18            | 45.92           | 50.09           | 107.45           | 353.44         | 369.41          |
| 18               | 1455.49               | 3.07             | 61.89         | 2.87            | 12.13            | 122.80         | 344.12            | 38.07           | 37.77           | 137.09           | 348.68         | 374.66          |
| 21               | 1123.30               | 1.55             | 37.58         | 1.90            | 6.07             | 64.46          | 285.17            | 26.33           | 37.07           | 112.49           | 276.31         | 298.33          |
| 24               | 1094.81               | 1.08             | 18.97         | 1.46            | 5.24             | 22.95          | 278.94            | 17.75           | 29.48           | 109.51           | 260.60         | 282.68          |
| 27               | 1064.51               | 1.14             | 17.09         | 2.67            | 6.62             | 15.25          | 258.36            | 18.76           | 33.28           | 104.02           | 240.77         | 262.28          |
| 30               | 1193.54               | 0.91             | 48.04         | 3.50            | 5.42             | 29.00          | 276.33            | 18.59           | 23.48           | 75.14            | 273.50         | 283.63          |
| 33               | 963.31                | 1.57             | 14.01         | 3.54            | 5.61             | 24.27          | 220.81            | 14.69           | 22.66           | 59.93            | 216.16         | 224.31          |
| 36               | 626.00                | 1.92             | 18.31         | 2.90            | 5.30             | 19.81          | 139.02            | 9.47            | 19.60           | 42.64            | 136.93         | 143.42          |
| 39               | 410.72                | 1.35             | 17.23         | 2.07            | 4.42             | 17.50          | 92.03             | 5.97            | 16.42           | 29.09            | 92.51          | 96.98           |
| 42               | 303.55                | 0.68             | 11.01         | 1.28            | 3.42             | 15.36          | 70.47             | 4.10            | 13.03           | 21.37            | 71.18          | 74.32           |
| 45               | 261.59                | 0.35             | 7.26          | 0.95            | 2.62             | 14.39          | 62.57             | 3.86            | 10.83           | 16.76            | 63.51          | 65.68           |
| 48               | 268.71                | 0.35             | 6.01          | 0.98            | 2.36             | 12.33          | 64.02             | 3.85            | 8.56            | 15.68            | 64.31          | 66.20           |
| 52               | 254.35                | 0.29             | 2.36          | 0.72            | 1.95             | 8.52           | 58.99             | 3.76            | 7.51            | 13.41            | 58.77          | 60.28           |
| 56               | 227.81                | 0.27             | 1.79          | 0.74            | 1.55             | 3.86           | 53.37             | 3.94            | 8.31            | 11.44            | 53.13          | 54.35           |
| 60               | 200.61                | 0.38             | 2.03          | 0.66            | 1.92             | 2.24           | 48.53             | 3.98            | 10.64           | 13.17            | 48.21          | 49.97           |
| 64               | 167.17                | 0.36             | 1.67          | 0.52            | 2.91             | 1.60           | 41.53             | 3.46            | 14.14           | 17.50            | 40.55          | 44.17           |
| 68               | 110.94                | 0.45             | 2.70          | 1.08            | 3.90             | 5.36           | 35.26             | 3.14            | 20.19           | 23.70            | 33.94          | 41.40           |

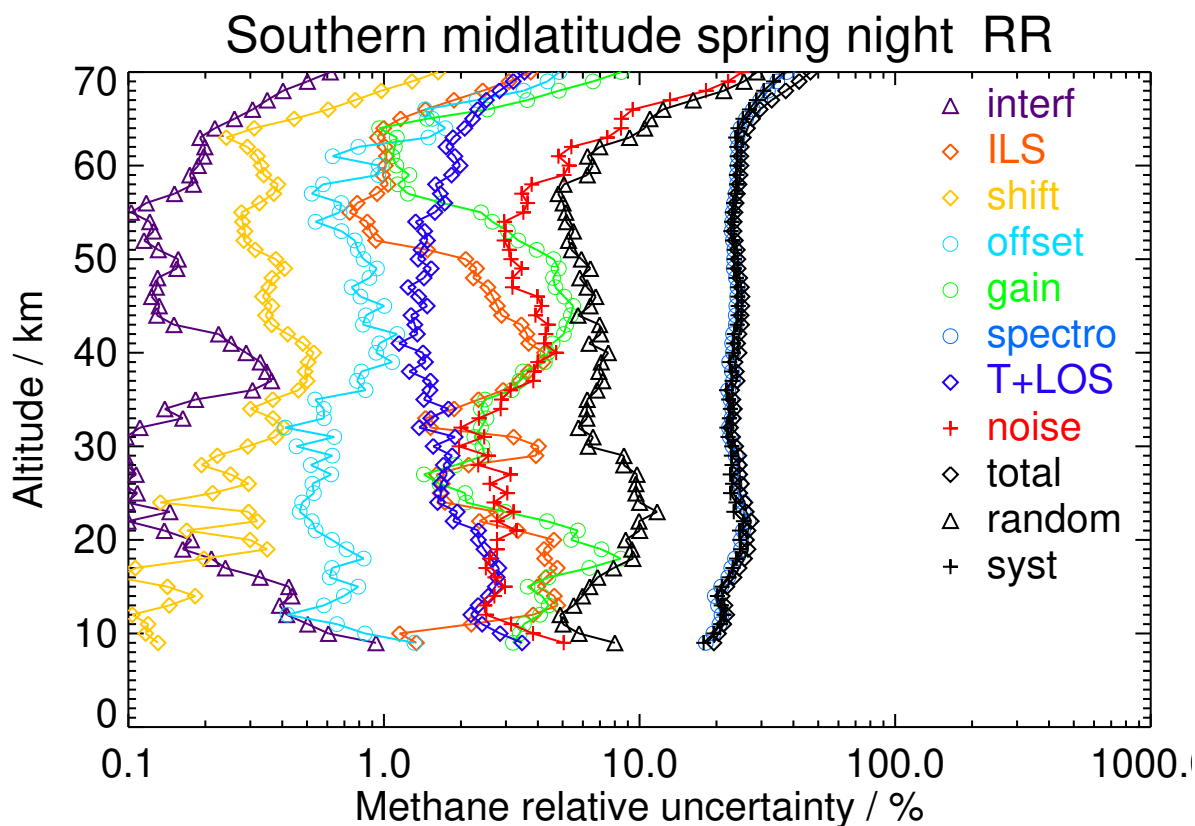

**Figure S56.** V8R\_CH4\_261 Southern midlatitude spring night

**Table S57.** Methane error budget for Southern midlatitude summer day. All uncertainties are  $1\sigma$ .

| altitude<br>(km) | mean target<br>(ppbv) | interf<br>(ppbv) | ILS<br>(ppbv) | shift<br>(ppbv) | offset<br>(ppbv) | gain<br>(ppbv) | spectro<br>(ppbv) | T+LOS<br>(ppbv) | noise<br>(ppbv) | random<br>(ppbv) | syst<br>(ppbv) | total<br>(ppbv) |
|------------------|-----------------------|------------------|---------------|-----------------|------------------|----------------|-------------------|-----------------|-----------------|------------------|----------------|-----------------|
| 9                | 1659.84               | 24.75            | 31.40         | 2.91            | 23.05            | 56.78          | 272.03            | 54.56           | 91.24           | 165.37           | 251.63         | 301.10          |
| 12               | 1785.30               | 8.25             | 50.31         | 1.93            | 6.67             | 69.64          | 357.88            | 33.76           | 39.84           | 104.80           | 356.82         | 371.89          |
| 15               | 1765.84               | 7.91             | 89.84         | 3.12            | 11.99            | 80.02          | 352.23            | 40.90           | 46.05           | 133.58           | 353.14         | 377.56          |
| 18               | 1596.47               | 4.43             | 83.55         | 2.66            | 9.94             | 96.34          | 338.38            | 37.69           | 38.13           | 132.31           | 340.96         | 365.73          |
| 21               | 1276.42               | 1.83             | 55.66         | 2.00            | 5.10             | 16.02          | 337.67            | 30.33           | 36.32           | 83.54            | 335.66         | 345.90          |
| 24               | 1177.37               | 1.37             | 21.57         | 1.08            | 4.59             | 12.46          | 286.37            | 19.17           | 26.56           | 58.80            | 283.32         | 289.35          |
| 27               | 1063.20               | 0.91             | 12.26         | 3.02            | 7.32             | 12.71          | 251.85            | 21.13           | 34.05           | 51.54            | 250.51         | 255.76          |
| 30               | 979.07                | 1.32             | 44.89         | 1.55            | 4.06             | 19.12          | 209.99            | 14.15           | 19.49           | 41.27            | 213.02         | 216.98          |
| 33               | 872.66                | 1.23             | 7.66          | 3.19            | 5.12             | 20.15          | 178.90            | 11.01           | 19.99           | 32.00            | 178.90         | 181.74          |
| 36               | 688.34                | 2.31             | 14.76         | 2.96            | 4.64             | 13.27          | 141.85            | 8.08            | 17.89           | 25.50            | 142.43         | 144.70          |
| 39               | 530.47                | 1.75             | 13.77         | 2.69            | 3.87             | 12.83          | 109.97            | 5.98            | 15.15           | 27.98            | 109.34         | 112.86          |
| 42               | 361.59                | 0.68             | 10.94         | 1.80            | 3.25             | 15.56          | 81.14             | 4.09            | 12.12           | 22.39            | 81.38          | 84.40           |
| 45               | 282.03                | 0.46             | 6.46          | 1.44            | 2.46             | 14.79          | 66.84             | 3.24            | 9.91            | 23.70            | 65.45          | 69.61           |
| 48               | 188.87                | 0.29             | 5.43          | 1.00            | 1.51             | 8.90           | 50.45             | 1.91            | 7.50            | 20.54            | 47.91          | 52.12           |
| 52               | 140.16                | 0.13             | 1.81          | 0.35            | 0.97             | 3.64           | 33.36             | 1.48            | 4.78            | 9.91             | 32.52          | 33.99           |
| 56               | 114.58                | 0.07             | 0.57          | 0.28            | 1.04             | 2.04           | 26.96             | 1.48            | 4.94            | 6.24             | 26.83          | 27.55           |
| 60               | 124.98                | 0.22             | 1.15          | 0.40            | 1.56             | 1.39           | 30.06             | 1.90            | 7.47            | 9.24             | 29.73          | 31.13           |
| 64               | 143.21                | 0.34             | 1.95          | 0.34            | 2.64             | 1.71           | 35.44             | 2.27            | 11.80           | 13.06            | 35.27          | 37.61           |
| 68               | 168.43                | 0.67             | 2.79          | 1.34            | 3.95             | 5.80           | 48.58             | 2.88            | 19.55           | 21.76            | 48.34          | 53.01           |

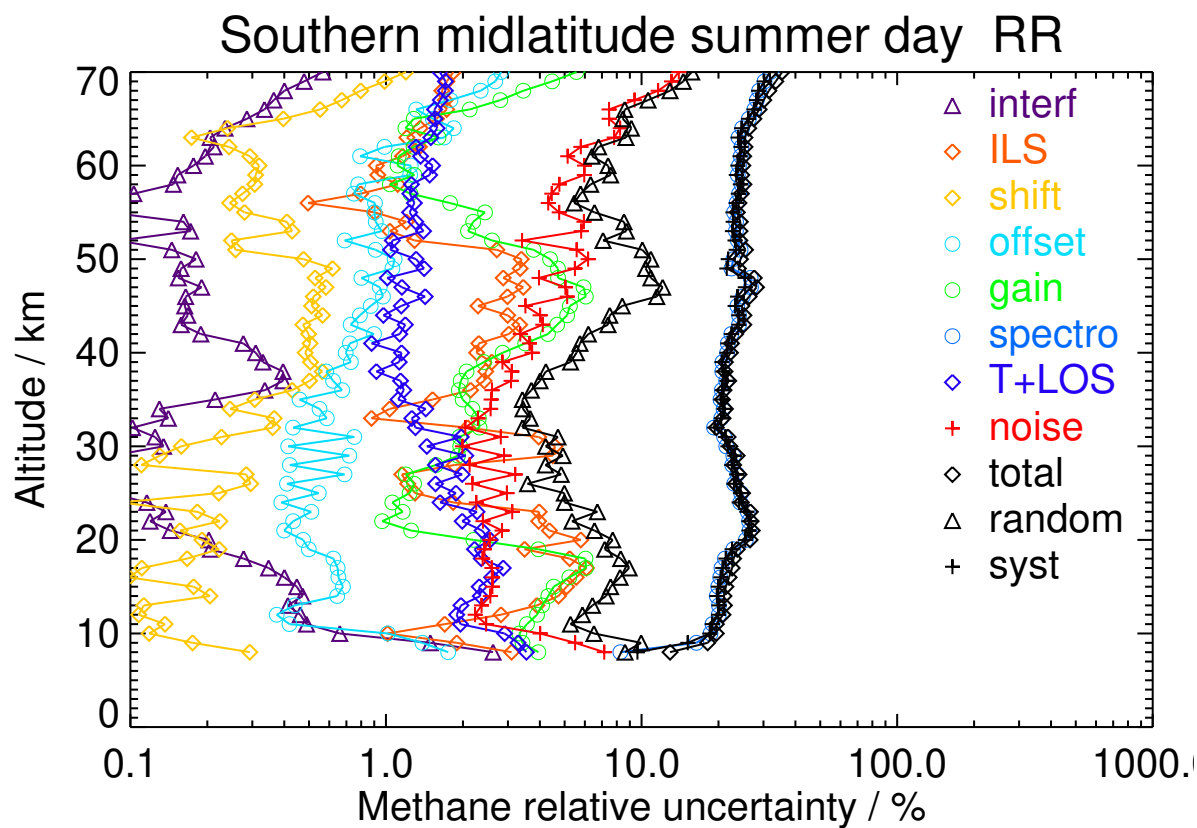

**Figure S57.** V8R\_CH4\_261 Southern midlatitude summer day

**Table S58.** Methane error budget for Southern midlatitude summer night. All uncertainties are  $1\sigma$ .

| altitude<br>(km) | mean target<br>(ppbv) | interf<br>(ppbv) | ILS<br>(ppbv) | shift<br>(ppbv) | offset<br>(ppbv) | gain<br>(ppbv) | spectro<br>(ppbv) | T+LOS<br>(ppbv) | noise<br>(ppbv) | random<br>(ppbv) | syst<br>(ppbv) | total<br>(ppbv) |
|------------------|-----------------------|------------------|---------------|-----------------|------------------|----------------|-------------------|-----------------|-----------------|------------------|----------------|-----------------|
| 9                | 1707.92               | 23.71            | 36.14         | 2.31            | 22.99            | 41.38          | 284.82            | 59.32           | 91.14           | 182.51           | 252.50         | 311.55          |
| 12               | 1770.64               | 7.50             | 35.64         | 1.82            | 6.87             | 60.29          | 383.05            | 32.94           | 41.03           | 101.02           | 379.87         | 393.07          |
| 15               | 1709.73               | 7.59             | 67.51         | 3.35            | 12.27            | 69.45          | 374.03            | 40.40           | 45.76           | 98.37            | 378.88         | 391.44          |
| 18               | 1580.12               | 3.57             | 75.62         | 4.53            | 12.95            | 119.94         | 373.89            | 37.45           | 37.23           | 121.32           | 384.92         | 403.59          |
| 21               | 1216.13               | 1.77             | 32.10         | 2.92            | 4.46             | 35.30          | 310.86            | 26.00           | 35.24           | 86.36            | 305.62         | 317.59          |
| 24               | 1163.30               | 1.47             | 14.56         | 1.35            | 4.17             | 11.38          | 259.45            | 18.24           | 27.67           | 56.12            | 256.17         | 262.25          |
| 27               | 1038.41               | 0.85             | 11.29         | 3.27            | 7.21             | 11.09          | 249.41            | 20.23           | 33.59           | 50.24            | 248.06         | 253.09          |
| 30               | 974.76                | 1.17             | 48.01         | 2.10            | 4.34             | 20.40          | 205.23            | 14.16           | 20.36           | 42.74            | 208.94         | 213.26          |
| 33               | 859.73                | 1.30             | 9.24          | 3.39            | 4.92             | 21.70          | 181.79            | 10.54           | 19.92           | 30.71            | 182.23         | 184.80          |
| 36               | 706.79                | 2.24             | 16.73         | 2.94            | 4.57             | 14.72          | 149.11            | 8.06            | 18.20           | 29.87            | 149.23         | 152.19          |
| 39               | 510.59                | 1.55             | 16.21         | 2.46            | 3.85             | 14.53          | 111.83            | 5.40            | 14.63           | 27.30            | 111.80         | 115.09          |
| 42               | 373.64                | 0.58             | 13.61         | 1.94            | 3.52             | 19.55          | 90.88             | 3.99            | 11.99           | 25.82            | 91.30          | 94.88           |
| 45               | 240.01                | 0.49             | 5.87          | 1.47            | 2.08             | 12.57          | 63.28             | 2.65            | 9.37            | 23.88            | 61.06          | 65.56           |
| 48               | 170.97                | 0.26             | 3.66          | 0.80            | 1.34             | 6.36           | 45.45             | 1.56            | 7.41            | 18.25            | 42.97          | 46.69           |
| 52               | 117.67                | 0.12             | 1.35          | 0.31            | 0.90             | 2.60           | 28.42             | 1.32            | 4.73            | 8.67             | 27.68          | 29.01           |
| 56               | 110.51                | 0.12             | 0.93          | 0.31            | 0.97             | 1.47           | 26.37             | 1.39            | 4.76            | 8.25             | 25.62          | 26.91           |
| 60               | 109.88                | 0.23             | 1.35          | 0.40            | 1.41             | 1.12           | 26.01             | 1.69            | 6.76            | 8.20             | 25.75          | 27.03           |
| 64               | 128.47                | 0.35             | 1.68          | 0.35            | 2.34             | 1.39           | 30.85             | 2.09            | 10.50           | 11.56            | 30.71          | 32.81           |
| 68               | 147.82                | 0.67             | 1.86          | 1.25            | 3.58             | 6.26           | 40.36             | 3.05            | 17.36           | 20.08            | 39.93          | 44.69           |

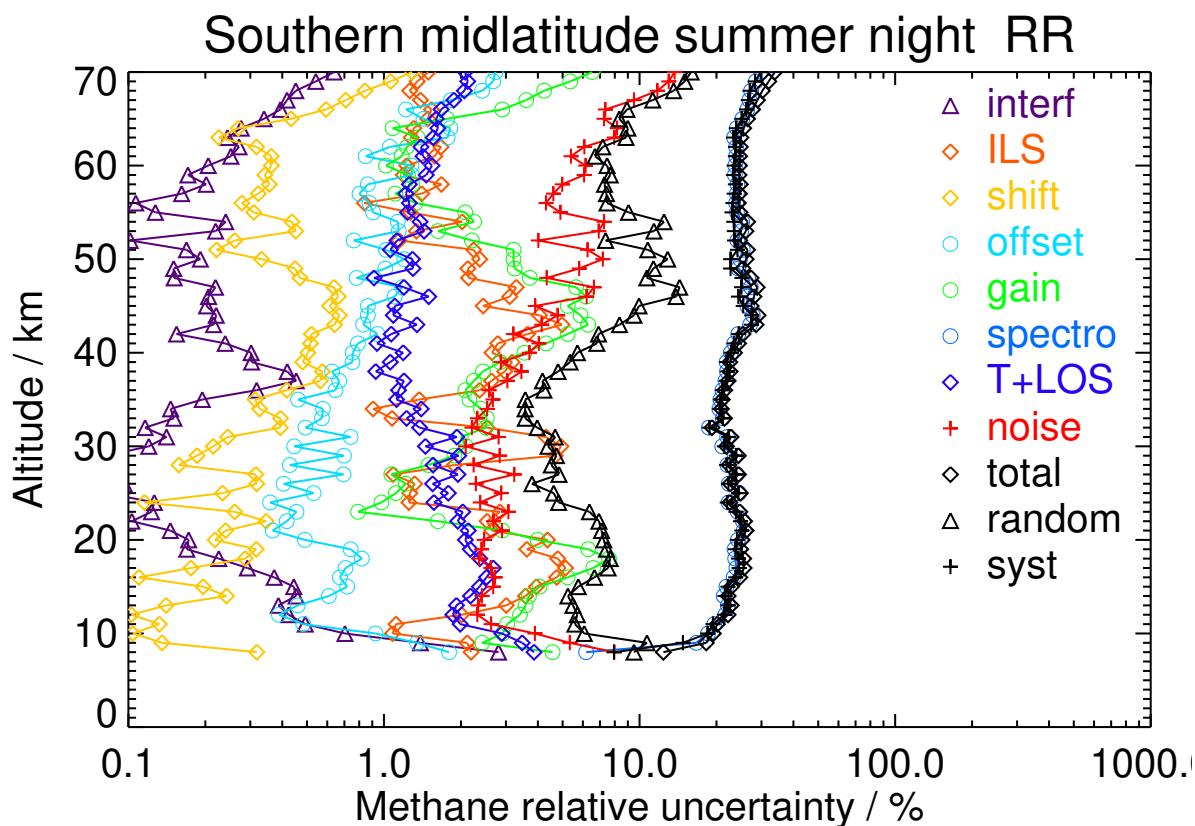

**Figure S58.** V8R\_CH4\_261 Southern midlatitude summer night

**Table S59.** Methane error budget for Southern midlatitude autumn day. All uncertainties are  $1\sigma$ .

| altitude<br>(km) | mean target<br>(ppbv) | interf<br>(ppbv) | ILS<br>(ppbv) | shift<br>(ppbv) | offset<br>(ppbv) | gain<br>(ppbv) | spectro<br>(ppbv) | T+LOS<br>(ppbv) | noise<br>(ppbv) | random<br>(ppbv) | syst<br>(ppbv) | total<br>(ppbv) |
|------------------|-----------------------|------------------|---------------|-----------------|------------------|----------------|-------------------|-----------------|-----------------|------------------|----------------|-----------------|
| 9                | 1751.93               | 16.59            | 12.65         | 2.46            | 25.77            | 61.65          | 348.78            | 66.02           | 90.45           | 128.32           | 350.18         | 372.96          |
| 12               | 1862.82               | 6.16             | 43.05         | 1.53            | 5.88             | 68.90          | 389.96            | 36.76           | 39.92           | 68.26            | 396.28         | 402.11          |
| 15               | 1775.10               | 5.78             | 51.37         | 2.42            | 13.08            | 69.17          | 370.54            | 45.58           | 47.53           | 88.91            | 375.99         | 386.36          |
| 18               | 1631.88               | 3.39             | 57.36         | 3.24            | 11.37            | 130.06         | 359.71            | 39.06           | 37.29           | 101.20           | 377.39         | 390.72          |
| 21               | 1319.51               | 1.36             | 32.44         | 2.74            | 7.14             | 80.39          | 319.11            | 30.40           | 36.83           | 86.72            | 322.75         | 334.20          |
| 24               | 1163.05               | 1.05             | 12.58         | 1.45            | 6.91             | 38.31          | 279.98            | 22.52           | 36.15           | 57.25            | 280.36         | 286.14          |
| 27               | 1014.39               | 0.99             | 8.68          | 1.48            | 6.58             | 17.06          | 236.45            | 20.14           | 33.37           | 51.14            | 235.00         | 240.50          |
| 30               | 874.21                | 0.63             | 27.84         | 2.43            | 6.96             | 15.62          | 211.64            | 19.81           | 28.59           | 48.19            | 211.54         | 216.96          |
| 33               | 763.02                | 1.09             | 8.55          | 2.52            | 6.67             | 17.11          | 174.60            | 13.91           | 26.22           | 50.39            | 171.01         | 178.28          |
| 36               | 548.79                | 1.50             | 15.62         | 1.94            | 5.87             | 18.06          | 134.99            | 9.02            | 22.77           | 58.02            | 126.76         | 139.40          |
| 39               | 462.15                | 1.44             | 16.78         | 2.01            | 5.27             | 19.95          | 113.79            | 7.24            | 20.80           | 58.27            | 103.69         | 118.94          |
| 42               | 370.98                | 0.81             | 14.79         | 1.06            | 4.62             | 21.55          | 96.25             | 5.79            | 17.96           | 51.95            | 87.34          | 101.62          |
| 45               | 345.66                | 0.37             | 9.45          | 1.00            | 3.95             | 22.04          | 89.33             | 5.92            | 15.50           | 46.87            | 81.54          | 94.05           |
| 48               | 317.20                | 0.41             | 6.48          | 1.08            | 3.72             | 19.12          | 81.49             | 5.88            | 12.58           | 39.02            | 75.72          | 85.19           |
| 52               | 305.85                | 0.35             | 2.13          | 0.70            | 2.97             | 12.32          | 70.82             | 6.11            | 11.23           | 22.52            | 69.55          | 73.10           |
| 56               | 294.77                | 0.33             | 1.74          | 0.67            | 2.26             | 6.99           | 68.35             | 6.39            | 12.18           | 18.00            | 67.79          | 70.14           |
| 60               | 230.02                | 0.31             | 1.02          | 0.45            | 2.25             | 3.43           | 55.58             | 5.24            | 13.40           | 19.14            | 54.29          | 57.57           |
| 64               | 137.30                | 0.26             | 1.22          | 0.31            | 3.14             | 1.38           | 35.63             | 3.16            | 15.77           | 19.41            | 34.13          | 39.27           |
| 68               | 60.35                 | 0.23             | 1.82          | 0.46            | 4.22             | 2.94           | 22.37             | 2.04            | 21.16           | 23.62            | 20.60          | 31.34           |

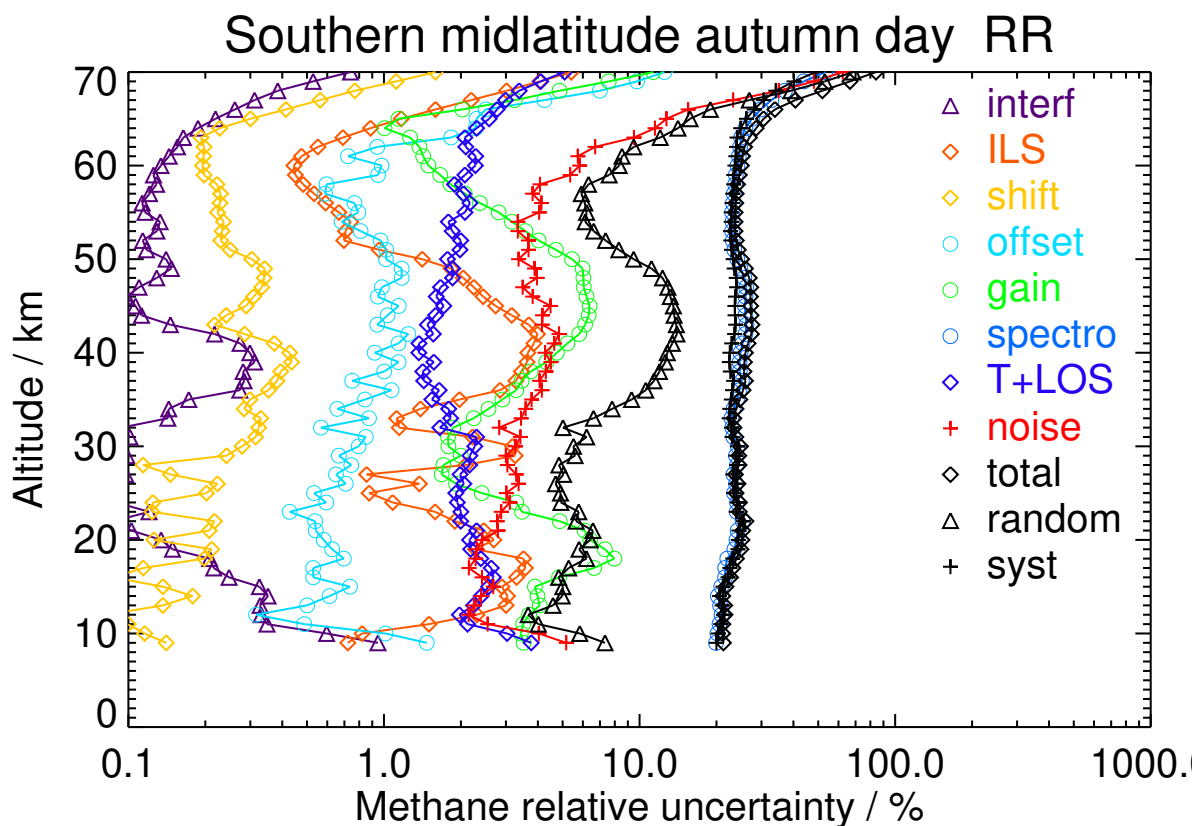

**Figure S59.** V8R\_CH4\_261 Southern midlatitude autumn day

**Table S60.** Methane error budget for Southern midlatitude autumn night. All uncertainties are  $1\sigma$ .

| altitude<br>(km) | mean target<br>(ppbv) | interf<br>(ppbv) | ILS<br>(ppbv) | shift<br>(ppbv) | offset<br>(ppbv) | gain<br>(ppbv) | spectro<br>(ppbv) | T+LOS<br>(ppbv) | noise<br>(ppbv) | random<br>(ppbv) | syst<br>(ppbv) | total<br>(ppbv) |
|------------------|-----------------------|------------------|---------------|-----------------|------------------|----------------|-------------------|-----------------|-----------------|------------------|----------------|-----------------|
| 9                | 1853.90               | 18.78            | 17.32         | 2.26            | 26.33            | 51.91          | 353.58            | 68.14           | 95.86           | 129.11           | 355.29         | 378.02          |
| 12               | 1860.35               | 6.43             | 50.19         | 1.36            | 5.93             | 75.72          | 409.73            | 36.53           | 40.37           | 77.31            | 416.17         | 423.29          |
| 15               | 1774.57               | 6.16             | 71.58         | 2.26            | 13.14            | 90.12          | 366.65            | 45.47           | 48.46           | 90.05            | 379.73         | 390.26          |
| 18               | 1622.12               | 3.16             | 71.65         | 3.49            | 11.84            | 135.66         | 344.37            | 40.63           | 36.76           | 91.67            | 369.98         | 381.17          |
| 21               | 1291.78               | 1.52             | 37.86         | 2.40            | 7.01             | 70.43          | 305.73            | 30.00           | 37.06           | 87.84            | 307.37         | 319.68          |
| 24               | 1125.80               | 1.16             | 16.49         | 1.76            | 5.26             | 20.84          | 260.72            | 20.01           | 30.25           | 52.26            | 259.42         | 264.63          |
| 27               | 999.83                | 0.84             | 15.70         | 2.51            | 8.51             | 12.66          | 243.23            | 21.78           | 39.05           | 58.84            | 241.21         | 248.28          |
| 30               | 882.03                | 0.68             | 34.52         | 2.33            | 4.67             | 16.70          | 200.66            | 16.39           | 23.27           | 47.93            | 200.69         | 206.34          |
| 33               | 751.09                | 1.02             | 6.21          | 2.52            | 6.00             | 15.72          | 166.86            | 11.77           | 24.11           | 45.95            | 163.64         | 169.97          |
| 36               | 572.37                | 1.38             | 10.33         | 1.87            | 6.01             | 14.83          | 127.86            | 8.08            | 22.49           | 51.56            | 120.95         | 131.48          |
| 39               | 491.76                | 1.65             | 14.65         | 2.26            | 5.36             | 16.21          | 111.39            | 6.63            | 20.46           | 55.82            | 101.33         | 115.69          |
| 42               | 420.69                | 1.02             | 13.78         | 1.52            | 4.63             | 20.18          | 101.45            | 5.53            | 17.46           | 50.49            | 93.28          | 106.06          |
| 45               | 346.08                | 0.39             | 8.20          | 1.03            | 3.69             | 19.73          | 89.88             | 5.43            | 14.58           | 47.38            | 80.91          | 93.76           |
| 48               | 324.94                | 0.45             | 5.81          | 1.29            | 3.19             | 15.91          | 81.40             | 5.16            | 11.40           | 36.14            | 75.99          | 84.15           |
| 52               | 294.19                | 0.36             | 1.94          | 0.78            | 2.55             | 9.30           | 67.54             | 5.52            | 11.06           | 21.74            | 65.87          | 69.37           |
| 56               | 283.11                | 0.47             | 2.10          | 0.73            | 2.34             | 4.74           | 63.75             | 6.07            | 12.41           | 17.79            | 63.02          | 65.49           |
| 60               | 225.61                | 0.40             | 1.32          | 0.48            | 2.61             | 2.42           | 52.97             | 5.22            | 14.03           | 17.64            | 52.28          | 55.18           |
| 64               | 136.10                | 0.29             | 0.97          | 0.36            | 3.25             | 1.45           | 34.93             | 3.39            | 16.34           | 19.84            | 33.45          | 38.89           |
| 68               | 67.60                 | 0.28             | 1.94          | 0.48            | 4.01             | 3.84           | 23.48             | 2.44            | 20.92           | 24.10            | 21.18          | 32.09           |

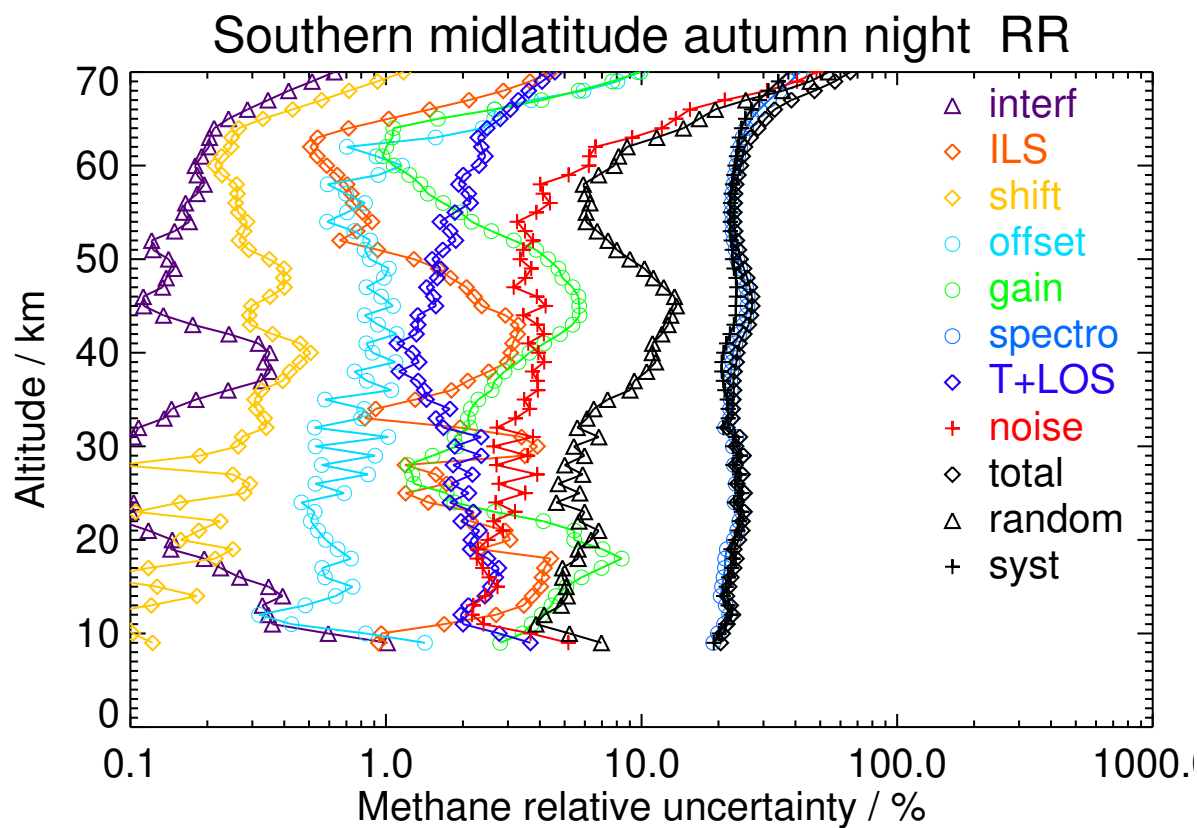

**Figure S60.** V8R\_CH4\_261 Southern midlatitude autumn night

**Table S61.** Methane error budget for Southern polar winter day. All uncertainties are  $1\sigma$ .

| altitude<br>(km) | mean target<br>(ppbv) | interf<br>(ppbv) | ILS<br>(ppbv) | shift<br>(ppbv) | offset<br>(ppbv) | gain<br>(ppbv) | spectro<br>(ppbv) | T+LOS<br>(ppbv) | noise<br>(ppbv) | random<br>(ppbv) | syst<br>(ppbv) | total<br>(ppbv) |
|------------------|-----------------------|------------------|---------------|-----------------|------------------|----------------|-------------------|-----------------|-----------------|------------------|----------------|-----------------|
| 9                | 1810.04               | 35.13            | 2.29          | 0.86            | 26.97            | 53.61          | 264.28            | 46.57           | 110.40          | 128.79           | 269.18         | 298.40          |
| 12               | 1789.07               | 12.00            | 34.82         | 2.31            | 11.43            | 58.32          | 406.36            | 44.92           | 58.32           | 83.04            | 410.54         | 418.85          |
| 15               | 1495.94               | 13.90            | 9.64          | 2.94            | 14.07            | 41.43          | 321.38            | 51.55           | 58.54           | 85.43            | 322.92         | 334.03          |
| 18               | 1273.25               | 3.97             | 22.83         | 3.47            | 8.78             | 56.12          | 334.97            | 33.19           | 40.92           | 66.62            | 338.11         | 344.61          |
| 21               | 966.45                | 1.70             | 19.20         | 1.18            | 6.18             | 29.92          | 261.86            | 22.93           | 39.09           | 63.33            | 260.62         | 268.20          |
| 24               | 659.44                | 1.09             | 12.09         | 2.23            | 8.56             | 10.69          | 178.43            | 22.20           | 50.06           | 80.11            | 169.58         | 187.55          |
| 27               | 487.20                | 1.14             | 8.16          | 0.80            | 6.08             | 5.33           | 115.12            | 13.94           | 36.13           | 62.02            | 105.08         | 122.01          |
| 30               | 531.93                | 1.41             | 17.82         | 2.21            | 8.80             | 6.54           | 127.35            | 15.34           | 39.27           | 50.22            | 126.17         | 135.80          |
| 33               | 328.93                | 2.04             | 6.31          | 2.49            | 6.31             | 4.67           | 85.64             | 10.70           | 30.95           | 50.35            | 77.35          | 92.29           |
| 36               | 216.24                | 1.44             | 4.88          | 1.53            | 4.56             | 4.96           | 55.93             | 6.25            | 24.12           | 40.71            | 46.53          | 61.83           |
| 39               | 198.65                | 0.79             | 4.00          | 0.78            | 3.41             | 5.68           | 48.23             | 4.67            | 17.93           | 25.10            | 45.83          | 52.25           |
| 42               | 189.61                | 0.32             | 3.18          | 1.11            | 2.56             | 6.54           | 44.83             | 4.12            | 12.81           | 17.61            | 44.06          | 47.45           |
| 45               | 205.12                | 0.21             | 4.05          | 0.75            | 2.08             | 7.27           | 47.40             | 3.50            | 9.66            | 14.77            | 46.99          | 49.26           |
| 48               | 192.32                | 0.19             | 3.67          | 0.53            | 1.67             | 6.45           | 43.65             | 2.84            | 7.32            | 12.56            | 43.21          | 45.00           |
| 52               | 166.01                | 0.14             | 2.23          | 0.48            | 1.35             | 4.49           | 38.54             | 2.31            | 5.70            | 9.38             | 38.24          | 39.37           |
| 56               | 144.92                | 0.10             | 2.04          | 0.31            | 1.10             | 3.25           | 35.66             | 2.06            | 6.21            | 8.83             | 35.39          | 36.48           |
| 60               | 129.49                | 0.08             | 1.15          | 0.33            | 1.46             | 2.74           | 33.00             | 2.16            | 9.29            | 11.89            | 32.40          | 34.51           |
| 64               | 101.88                | 0.22             | 0.73          | 0.48            | 2.87             | 1.82           | 28.15             | 1.86            | 14.26           | 16.60            | 27.12          | 31.80           |
| 68               | 90.71                 | 0.41             | 1.03          | 1.53            | 4.71             | 3.97           | 29.07             | 2.10            | 23.62           | 25.80            | 27.99          | 38.07           |

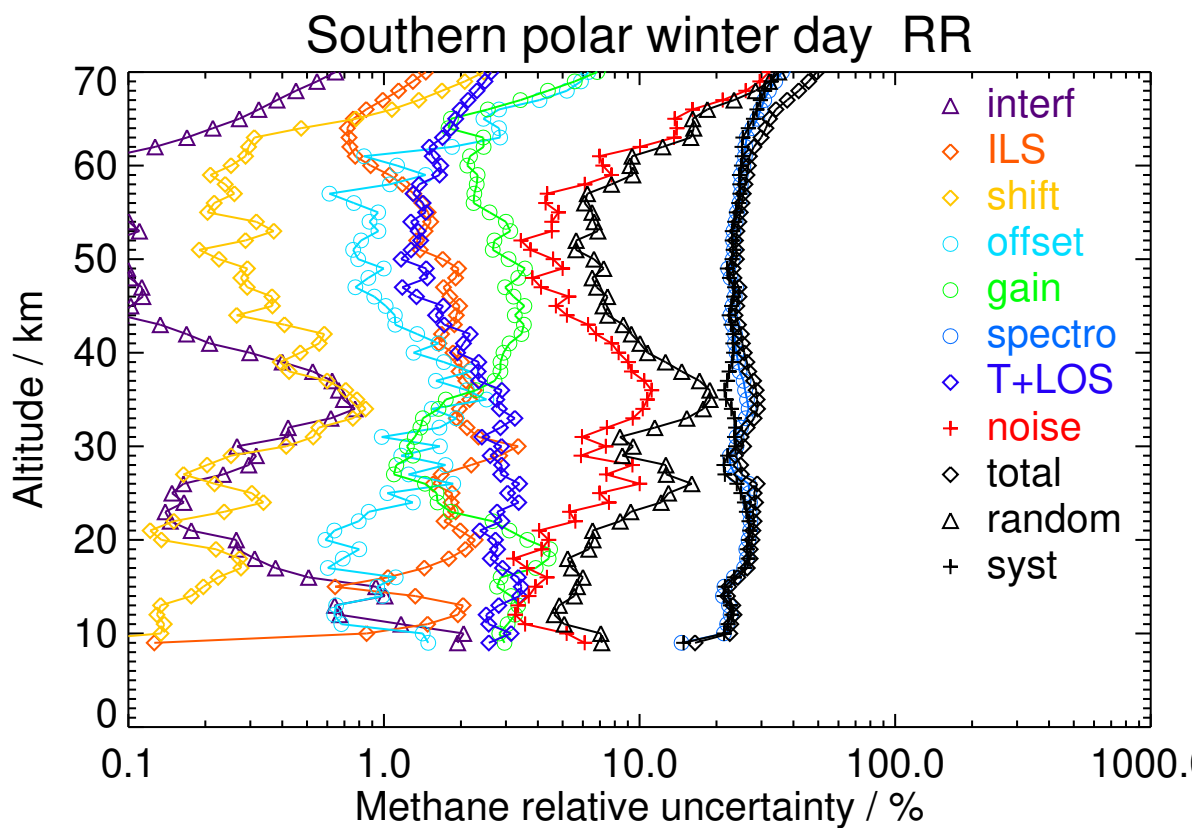

**Figure S61.** V8R\_CH4\_261 Southern polar winter day



**Table S62.** Methane error budget for Southern polar winter night. All uncertainties are  $1\sigma$ .

| altitude<br>(km) | mean target<br>(ppbv) | interf<br>(ppbv) | ILS<br>(ppbv) | shift<br>(ppbv) | offset<br>(ppbv) | gain<br>(ppbv) | spectro<br>(ppbv) | T+LOS<br>(ppbv) | noise<br>(ppbv) | random<br>(ppbv) | syst<br>(ppbv) | total<br>(ppbv) |
|------------------|-----------------------|------------------|---------------|-----------------|------------------|----------------|-------------------|-----------------|-----------------|------------------|----------------|-----------------|
| 9                | 1733.87               | 30.31            | 10.50         | 1.39            | 23.55            | 60.11          | 218.54            | 43.15           | 96.11           | 129.08           | 217.71         | 253.10          |
| 12               | 1824.70               | 8.83             | 39.54         | 1.37            | 8.43             | 62.45          | 348.32            | 42.01           | 47.88           | 72.36            | 354.63         | 361.94          |
| 15               | 1519.23               | 13.91            | 17.99         | 2.24            | 13.65            | 46.05          | 265.09            | 51.55           | 58.88           | 94.97            | 264.97         | 281.47          |
| 18               | 1244.95               | 3.82             | 14.11         | 2.27            | 8.92             | 49.02          | 260.11            | 35.76           | 42.69           | 71.67            | 261.39         | 271.03          |
| 21               | 988.52                | 2.39             | 18.59         | 1.09            | 5.86             | 28.03          | 232.12            | 25.44           | 42.12           | 60.10            | 232.08         | 239.74          |
| 24               | 724.20                | 1.04             | 12.74         | 2.28            | 9.08             | 16.54          | 187.54            | 23.03           | 50.57           | 73.09            | 182.87         | 196.93          |
| 27               | 459.93                | 1.16             | 9.17          | 1.08            | 6.36             | 6.72           | 119.42            | 14.74           | 36.69           | 64.06            | 109.06         | 126.48          |
| 30               | 447.10                | 0.95             | 12.78         | 1.92            | 8.55             | 10.24          | 114.87            | 13.57           | 37.12           | 54.52            | 110.14         | 122.89          |
| 33               | 331.56                | 1.88             | 6.51          | 2.17            | 6.60             | 8.82           | 87.30             | 10.39           | 28.85           | 45.15            | 81.83          | 93.45           |
| 36               | 216.10                | 1.16             | 4.31          | 1.31            | 5.03             | 6.36           | 59.39             | 6.18            | 22.44           | 38.69            | 51.57          | 64.47           |
| 39               | 182.95                | 0.68             | 3.11          | 0.85            | 3.76             | 7.61           | 48.18             | 4.68            | 17.03           | 26.83            | 44.67          | 52.11           |
| 42               | 180.93                | 0.33             | 4.62          | 1.20            | 2.79             | 7.90           | 45.92             | 4.05            | 12.55           | 21.34            | 43.82          | 48.74           |
| 45               | 181.79                | 0.21             | 4.32          | 0.69            | 2.05             | 7.29           | 43.78             | 3.17            | 9.19            | 16.30            | 42.68          | 45.69           |
| 48               | 176.67                | 0.17             | 2.60          | 0.30            | 1.53             | 5.66           | 41.68             | 2.33            | 6.74            | 12.62            | 40.87          | 42.77           |
| 52               | 151.94                | 0.13             | 1.96          | 0.37            | 1.23             | 4.18           | 36.95             | 2.08            | 5.50            | 8.23             | 36.81          | 37.72           |
| 56               | 138.31                | 0.10             | 1.55          | 0.36            | 1.20             | 3.22           | 34.05             | 2.11            | 6.71            | 8.83             | 33.84          | 34.98           |
| 60               | 115.17                | 0.09             | 0.89          | 0.29            | 1.67             | 2.26           | 29.21             | 2.11            | 10.10           | 12.06            | 28.69          | 31.12           |
| 64               | 101.01                | 0.21             | 0.97          | 0.31            | 2.89             | 1.43           | 25.55             | 1.86            | 14.02           | 15.99            | 24.67          | 29.40           |
| 68               | 76.58                 | 0.41             | 1.65          | 1.32            | 4.55             | 4.81           | 23.39             | 2.19            | 22.22           | 24.90            | 21.77          | 33.08           |

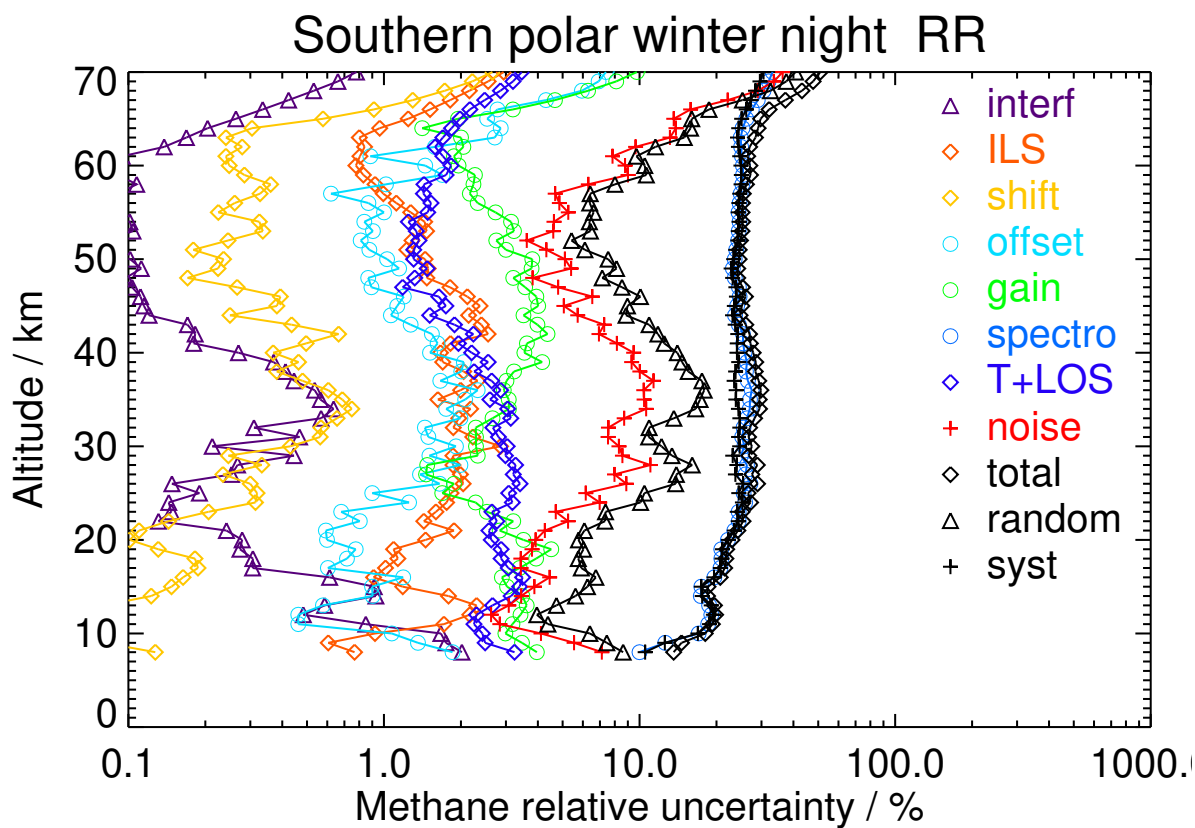

**Figure S62.** V8R\_CH4\_261 Southern polar winter night

**Table S63.** Methane error budget for Southern polar spring day. All uncertainties are  $1\sigma$ .

| altitude<br>(km) | mean target<br>(ppbv) | interf<br>(ppbv) | ILS<br>(ppbv) | shift<br>(ppbv) | offset<br>(ppbv) | gain<br>(ppbv) | spectro<br>(ppbv) | T+LOS<br>(ppbv) | noise<br>(ppbv) | random<br>(ppbv) | syst<br>(ppbv) | total<br>(ppbv) |
|------------------|-----------------------|------------------|---------------|-----------------|------------------|----------------|-------------------|-----------------|-----------------|------------------|----------------|-----------------|
| 9                | 1762.63               | 28.76            | 19.17         | 4.09            | 23.93            | 58.61          | 246.41            | 45.35           | 104.27          | 129.56           | 249.15         | 280.83          |
| 12               | 1728.51               | 11.79            | 52.81         | 4.16            | 8.42             | 52.20          | 419.53            | 49.74           | 51.10           | 114.10           | 416.91         | 432.24          |
| 15               | 1348.01               | 7.30             | 31.81         | 2.64            | 11.60            | 22.97          | 263.01            | 47.25           | 53.16           | 96.42            | 258.20         | 275.62          |
| 18               | 1238.69               | 2.07             | 26.07         | 3.43            | 7.40             | 37.82          | 291.04            | 32.93           | 32.43           | 87.63            | 285.20         | 298.36          |
| 21               | 1018.10               | 1.28             | 26.46         | 3.16            | 4.39             | 33.06          | 289.62            | 18.86           | 25.77           | 120.68           | 268.63         | 294.49          |
| 24               | 971.48                | 0.77             | 19.86         | 1.69            | 6.71             | 18.51          | 295.35            | 18.73           | 32.54           | 151.98           | 257.54         | 299.04          |
| 27               | 865.38                | 1.27             | 8.78          | 3.07            | 3.22             | 15.05          | 224.25            | 12.04           | 18.70           | 124.94           | 188.41         | 226.07          |
| 30               | 919.54                | 1.06             | 34.26         | 3.79            | 6.19             | 26.87          | 234.94            | 17.42           | 24.70           | 117.20           | 210.54         | 240.96          |
| 33               | 767.28                | 1.36             | 13.26         | 2.85            | 4.42             | 18.36          | 174.30            | 14.29           | 21.56           | 77.54            | 159.93         | 177.74          |
| 36               | 557.66                | 1.27             | 9.43          | 3.45            | 3.70             | 11.52          | 121.64            | 8.67            | 20.06           | 45.77            | 115.87         | 124.59          |
| 39               | 388.88                | 1.15             | 14.36         | 2.21            | 3.05             | 13.34          | 82.87             | 5.24            | 16.69           | 29.02            | 82.04          | 87.02           |
| 42               | 307.15                | 0.75             | 10.93         | 1.58            | 2.46             | 12.00          | 65.94             | 3.97            | 12.95           | 21.22            | 65.99          | 69.31           |
| 45               | 281.12                | 0.35             | 7.94          | 0.96            | 2.29             | 13.35          | 63.18             | 3.70            | 10.61           | 16.59            | 63.96          | 66.07           |
| 48               | 286.47                | 0.46             | 8.28          | 1.20            | 2.46             | 15.37          | 64.41             | 4.32            | 9.00            | 21.43            | 64.04          | 67.53           |
| 52               | 268.08                | 0.34             | 4.94          | 0.82            | 1.93             | 8.62           | 59.42             | 3.80            | 7.19            | 14.38            | 59.11          | 60.83           |
| 56               | 251.37                | 0.28             | 2.99          | 0.87            | 1.31             | 4.55           | 57.89             | 3.88            | 7.28            | 10.99            | 57.71          | 58.75           |
| 60               | 221.81                | 0.34             | 1.92          | 0.74            | 1.43             | 2.90           | 53.56             | 4.14            | 9.32            | 12.48            | 53.22          | 54.66           |
| 64               | 189.00                | 0.38             | 1.37          | 0.64            | 2.53             | 1.73           | 47.12             | 3.45            | 12.54           | 15.45            | 46.51          | 49.01           |
| 68               | 150.58                | 0.47             | 2.24          | 1.23            | 4.27             | 5.55           | 43.67             | 3.41            | 21.26           | 24.45            | 42.76          | 49.26           |

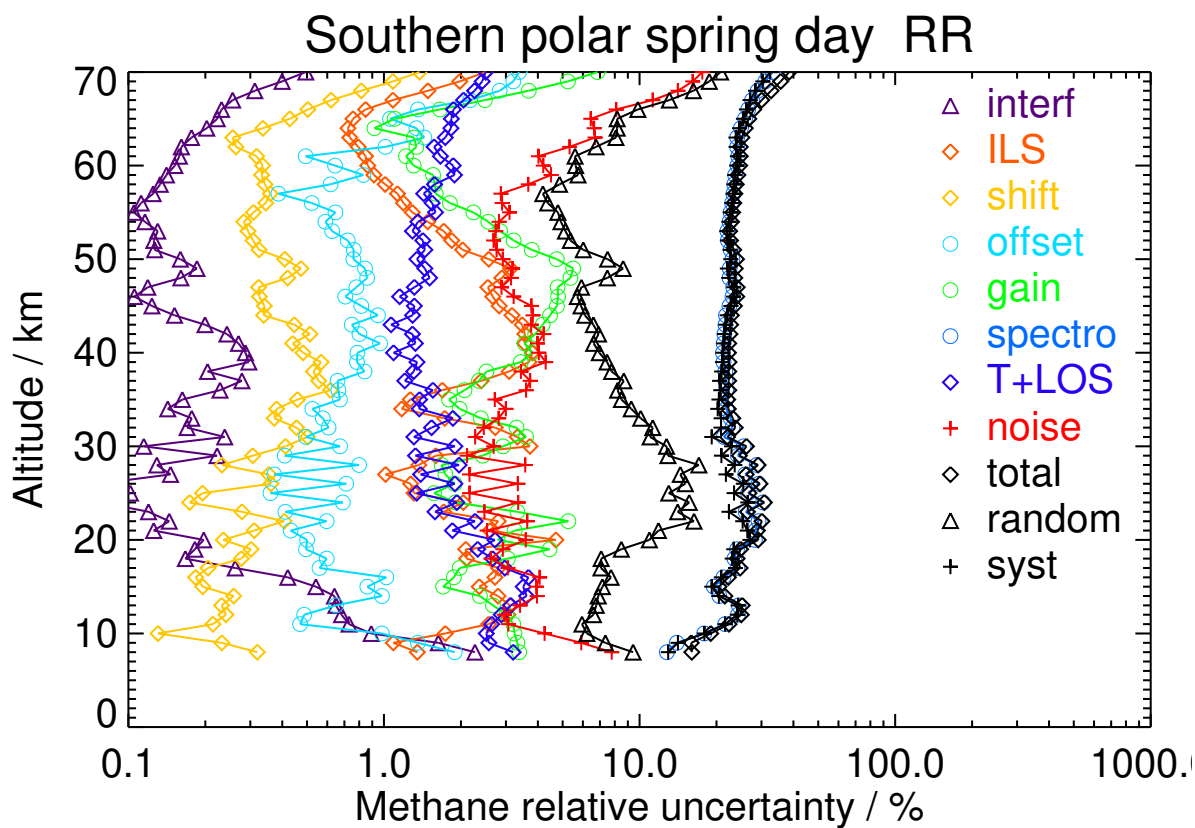

**Figure S63.** V8R\_CH4\_261 Southern polar spring day

**Table S64.** Methane error budget for Southern polar spring night. All uncertainties are  $1\sigma$ .

| altitude<br>(km) | mean target<br>(ppbv) | interf<br>(ppbv) | ILS<br>(ppbv) | shift<br>(ppbv) | offset<br>(ppbv) | gain<br>(ppbv) | spectro<br>(ppbv) | T+LOS<br>(ppbv) | noise<br>(ppbv) | random<br>(ppbv) | syst<br>(ppbv) | total<br>(ppbv) |
|------------------|-----------------------|------------------|---------------|-----------------|------------------|----------------|-------------------|-----------------|-----------------|------------------|----------------|-----------------|
| 9                | 1731.71               | 20.70            | 19.11         | 3.20            | 20.14            | 47.80          | 176.80            | 40.35           | 89.29           | 118.40           | 174.17         | 210.61          |
| 12               | 1685.64               | 7.08             | 33.19         | 2.51            | 7.96             | 36.83          | 355.19            | 38.42           | 45.45           | 87.40            | 353.05         | 363.70          |
| 15               | 1320.69               | 7.02             | 28.12         | 2.37            | 9.86             | 31.59          | 242.11            | 38.41           | 46.86           | 96.91            | 234.17         | 253.43          |
| 18               | 1242.33               | 1.89             | 33.74         | 3.66            | 6.71             | 46.38          | 294.54            | 29.73           | 29.84           | 81.94            | 291.83         | 303.12          |
| 21               | 1131.89               | 1.34             | 30.42         | 2.69            | 5.05             | 50.23          | 310.32            | 18.23           | 24.10           | 106.89           | 298.79         | 317.33          |
| 24               | 1027.94               | 0.89             | 20.00         | 1.74            | 6.92             | 35.13          | 282.36            | 19.24           | 33.95           | 124.13           | 259.86         | 287.99          |
| 27               | 1046.58               | 1.24             | 11.97         | 2.40            | 3.60             | 25.01          | 247.79            | 13.60           | 19.56           | 112.45           | 223.85         | 250.51          |
| 30               | 995.26                | 0.87             | 33.74         | 3.58            | 6.78             | 31.27          | 261.62            | 19.25           | 26.19           | 116.20           | 241.19         | 267.72          |
| 33               | 808.63                | 1.19             | 10.47         | 3.20            | 4.65             | 29.06          | 204.18            | 15.06           | 21.51           | 85.94            | 189.69         | 208.25          |
| 36               | 555.04                | 1.32             | 14.82         | 3.08            | 3.72             | 19.90          | 141.26            | 8.57            | 19.10           | 54.86            | 134.25         | 145.03          |
| 39               | 410.61                | 0.91             | 19.11         | 2.03            | 3.60             | 24.07          | 98.98             | 5.66            | 16.59           | 36.56            | 98.64          | 105.19          |
| 42               | 331.24                | 0.67             | 14.21         | 1.79            | 3.08             | 21.10          | 78.62             | 4.41            | 13.50           | 26.66            | 79.58          | 83.92           |
| 45               | 277.14                | 0.39             | 8.97          | 1.22            | 2.81             | 19.66          | 69.51             | 3.95            | 11.47           | 24.10            | 69.82          | 73.86           |
| 48               | 279.42                | 0.40             | 8.60          | 1.51            | 3.21             | 23.29          | 72.23             | 4.41            | 9.79            | 28.10            | 71.91          | 77.21           |
| 52               | 268.06                | 0.39             | 3.58          | 0.70            | 2.03             | 10.31          | 62.59             | 3.68            | 7.84            | 15.91            | 62.15          | 64.16           |
| 56               | 249.08                | 0.38             | 2.38          | 0.83            | 1.40             | 4.95           | 57.78             | 4.02            | 7.95            | 11.59            | 57.59          | 58.75           |
| 60               | 207.43                | 0.37             | 1.09          | 0.62            | 1.45             | 2.50           | 49.53             | 4.23            | 9.81            | 12.12            | 49.30          | 50.76           |
| 64               | 164.67                | 0.38             | 1.13          | 0.50            | 2.49             | 1.73           | 40.81             | 3.43            | 12.78           | 14.89            | 40.36          | 43.02           |
| 68               | 131.78                | 0.55             | 3.32          | 1.32            | 4.28             | 6.87           | 38.69             | 3.89            | 21.72           | 24.81            | 38.04          | 45.41           |

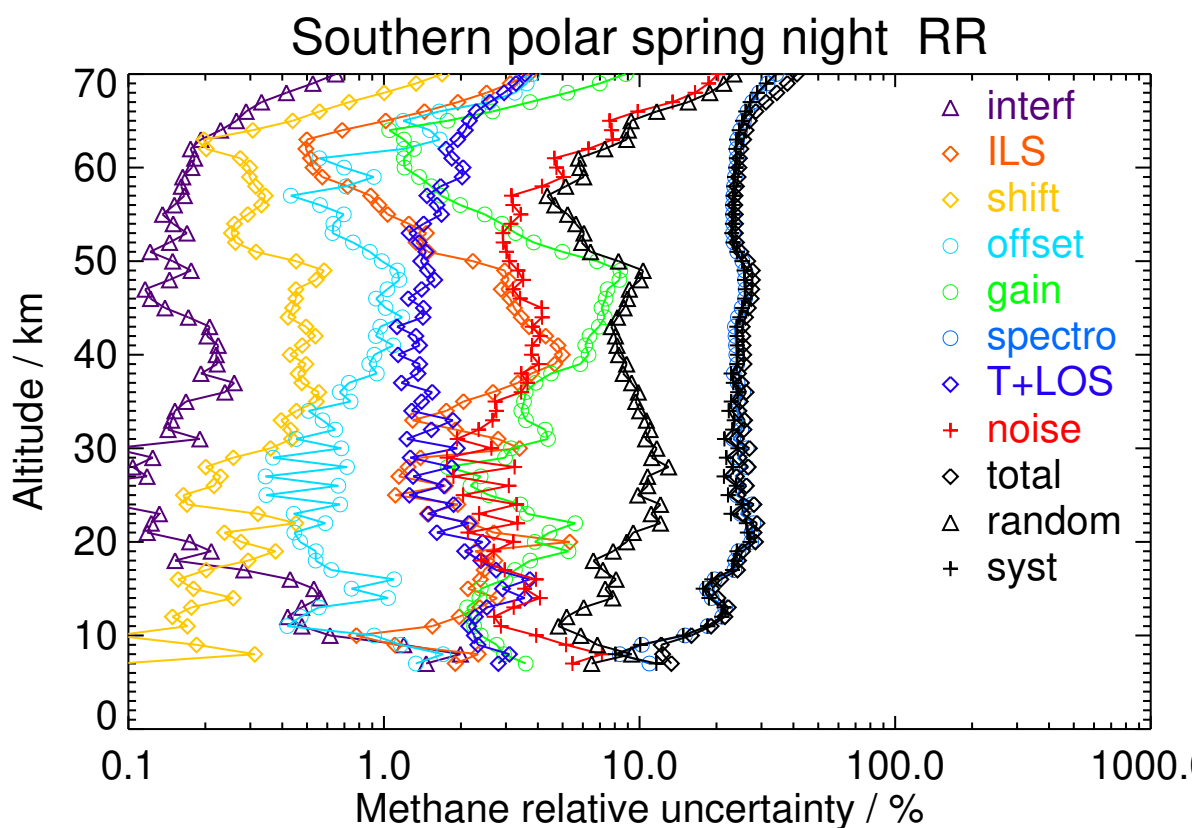

**Figure S64.** V8R\_CH4\_261 Southern polar spring night

**Table S65.** Methane error budget for Southern polar summer day. All uncertainties are  $1\sigma$ .

| altitude<br>(km) | mean target<br>(ppbv) | interf<br>(ppbv) | ILS<br>(ppbv) | shift<br>(ppbv) | offset<br>(ppbv) | gain<br>(ppbv) | spectro<br>(ppbv) | T+LOS<br>(ppbv) | noise<br>(ppbv) | random<br>(ppbv) | syst<br>(ppbv) | total<br>(ppbv) |
|------------------|-----------------------|------------------|---------------|-----------------|------------------|----------------|-------------------|-----------------|-----------------|------------------|----------------|-----------------|
| 9                | 1661.45               | 28.42            | 55.98         | 3.99            | 19.38            | 22.06          | 170.08            | 40.59           | 90.43           | 121.44           | 169.78         | 208.74          |
| 12               | 1748.10               | 5.30             | 36.53         | 1.71            | 6.31             | 45.78          | 388.77            | 31.71           | 36.12           | 70.93            | 389.77         | 396.17          |
| 15               | 1611.82               | 8.42             | 41.29         | 3.33            | 7.94             | 30.99          | 324.46            | 31.38           | 35.83           | 74.72            | 323.69         | 332.20          |
| 18               | 1448.98               | 2.41             | 56.20         | 5.39            | 5.54             | 34.29          | 369.79            | 25.98           | 26.95           | 61.52            | 372.51         | 377.56          |
| 21               | 1148.64               | 1.66             | 57.35         | 5.61            | 5.08             | 25.06          | 304.22            | 18.33           | 21.08           | 50.09            | 307.90         | 311.95          |
| 24               | 1154.60               | 0.88             | 27.84         | 1.55            | 7.94             | 14.86          | 314.01            | 21.28           | 32.27           | 49.14            | 314.24         | 318.06          |
| 27               | 1009.03               | 0.70             | 8.89          | 3.99            | 2.94             | 10.35          | 209.04            | 12.84           | 17.59           | 29.17            | 208.64         | 210.67          |
| 30               | 936.50                | 1.07             | 47.24         | 2.03            | 6.91             | 13.58          | 221.34            | 19.27           | 25.51           | 37.74            | 225.96         | 229.09          |
| 33               | 755.47                | 0.98             | 17.33         | 2.44            | 4.38             | 21.40          | 152.16            | 13.58           | 19.56           | 28.03            | 154.01         | 156.54          |
| 36               | 581.64                | 2.34             | 11.52         | 4.19            | 4.06             | 14.78          | 119.30            | 7.53            | 18.07           | 25.00            | 119.92         | 122.50          |
| 39               | 412.33                | 1.23             | 14.48         | 1.63            | 3.40             | 15.54          | 93.61             | 5.44            | 16.33           | 21.34            | 95.24          | 97.60           |
| 42               | 268.31                | 0.36             | 14.26         | 1.50            | 2.14             | 12.44          | 66.13             | 3.84            | 12.28           | 19.32            | 67.31          | 70.03           |
| 45               | 160.83                | 0.31             | 8.19          | 1.06            | 1.90             | 10.78          | 38.39             | 2.44            | 10.46           | 16.39            | 38.84          | 42.16           |
| 48               | 82.79                 | 0.19             | 2.34          | 0.39            | 1.21             | 2.97           | 19.27             | 1.07            | 7.36            | 9.82             | 18.60          | 21.03           |
| 52               | 55.88                 | 0.10             | 1.27          | 0.37            | 0.97             | 1.20           | 14.50             | 0.66            | 5.70            | 7.57             | 13.79          | 15.73           |
| 56               | 64.37                 | 0.06             | 0.70          | 0.10            | 0.74             | 1.25           | 17.00             | 0.74            | 3.84            | 6.63             | 16.22          | 17.52           |
| 60               | 104.22                | 0.21             | 0.78          | 0.53            | 0.86             | 1.75           | 30.20             | 1.25            | 4.79            | 16.72            | 25.72          | 30.68           |
| 64               | 102.29                | 0.35             | 1.11          | 0.44            | 1.72             | 1.67           | 29.04             | 1.40            | 7.67            | 15.06            | 26.17          | 30.19           |
| 68               | 114.68                | 0.43             | 2.16          | 0.89            | 3.56             | 1.77           | 33.47             | 1.81            | 15.64           | 19.17            | 31.97          | 37.28           |

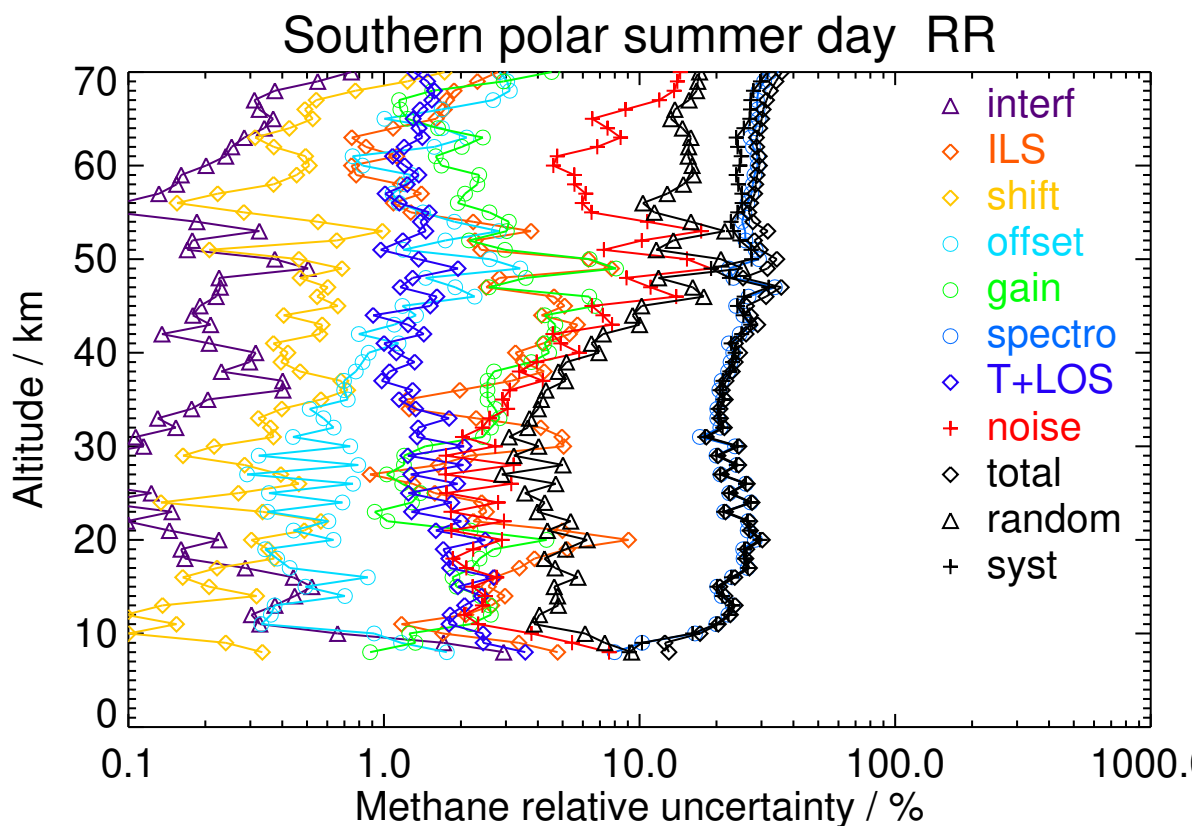

**Figure S65.** V8R\_CH4\_261 Southern polar summer day

**Table S66.** Methane error budget for Southern polar summer night. All uncertainties are  $1\sigma$ .

| altitude<br>(km) | mean target<br>(ppbv) | interf<br>(ppbv) | ILS<br>(ppbv) | shift<br>(ppbv) | offset<br>(ppbv) | gain<br>(ppbv) | spectro<br>(ppbv) | T+LOS<br>(ppbv) | noise<br>(ppbv) | random<br>(ppbv) | syst<br>(ppbv) | total<br>(ppbv) |
|------------------|-----------------------|------------------|---------------|-----------------|------------------|----------------|-------------------|-----------------|-----------------|------------------|----------------|-----------------|
| 9                | 1714.68               | 23.71            | 33.17         | 2.74            | 21.68            | 38.12          | 254.33            | 49.95           | 90.37           | 163.98           | 228.14         | 280.96          |
| 12               | 1759.22               | 6.39             | 35.99         | 1.68            | 6.30             | 50.44          | 382.16            | 34.18           | 40.26           | 74.51            | 383.68         | 390.85          |
| 15               | 1661.62               | 7.61             | 91.80         | 3.50            | 12.09            | 88.81          | 332.69            | 42.92           | 43.59           | 113.20           | 343.72         | 361.88          |
| 18               | 1526.14               | 3.17             | 53.58         | 5.73            | 10.98            | 112.21         | 352.73            | 30.40           | 32.87           | 91.31            | 365.66         | 376.89          |
| 21               | 1184.97               | 1.65             | 42.94         | 4.15            | 4.25             | 36.43          | 296.18            | 23.91           | 31.83           | 65.65            | 296.99         | 304.16          |
| 24               | 1136.63               | 0.72             | 15.73         | 1.16            | 7.82             | 18.87          | 301.52            | 21.68           | 32.69           | 47.04            | 301.50         | 305.15          |
| 27               | 976.40                | 0.84             | 9.50          | 3.36            | 3.96             | 9.19           | 198.43            | 14.13           | 21.52           | 30.66            | 198.24         | 200.60          |
| 30               | 894.71                | 1.36             | 46.36         | 1.79            | 6.54             | 14.09          | 216.43            | 17.08           | 23.50           | 34.64            | 221.09         | 223.79          |
| 33               | 718.12                | 1.75             | 7.18          | 3.40            | 4.86             | 22.46          | 139.14            | 10.77           | 17.48           | 25.22            | 140.50         | 142.75          |
| 36               | 515.08                | 2.51             | 16.91         | 2.88            | 4.49             | 17.23          | 105.27            | 6.85            | 15.31           | 21.86            | 107.25         | 109.46          |
| 39               | 359.08                | 0.92             | 15.09         | 1.25            | 3.15             | 14.71          | 81.04             | 4.91            | 12.65           | 19.88            | 82.54          | 84.90           |
| 42               | 194.95                | 0.42             | 10.83         | 1.68            | 2.20             | 12.32          | 49.27             | 2.88            | 9.25            | 17.39            | 49.96          | 52.90           |
| 45               | 117.49                | 0.32             | 2.89          | 0.72            | 1.33             | 6.29           | 31.62             | 1.60            | 7.47            | 12.82            | 30.73          | 33.29           |
| 48               | 73.05                 | 0.11             | 1.49          | 0.26            | 0.93             | 1.60           | 19.26             | 0.80            | 5.99            | 7.41             | 18.93          | 20.33           |
| 52               | 54.96                 | 0.06             | 0.71          | 0.24            | 0.76             | 1.27           | 13.49             | 0.59            | 3.84            | 4.95             | 13.25          | 14.14           |
| 56               | 66.06                 | 0.06             | 0.58          | 0.17            | 0.78             | 1.00           | 17.07             | 0.90            | 3.90            | 6.56             | 16.32          | 17.59           |
| 60               | 116.40                | 0.27             | 0.90          | 0.56            | 1.16             | 1.97           | 30.77             | 1.60            | 6.20            | 15.19            | 27.63          | 31.53           |
| 64               | 122.98                | 0.38             | 0.83          | 0.51            | 2.26             | 1.87           | 31.75             | 1.94            | 9.76            | 13.54            | 30.55          | 33.42           |
| 68               | 146.34                | 0.66             | 0.85          | 1.38            | 4.03             | 2.89           | 39.77             | 2.99            | 18.38           | 20.54            | 39.16          | 44.22           |

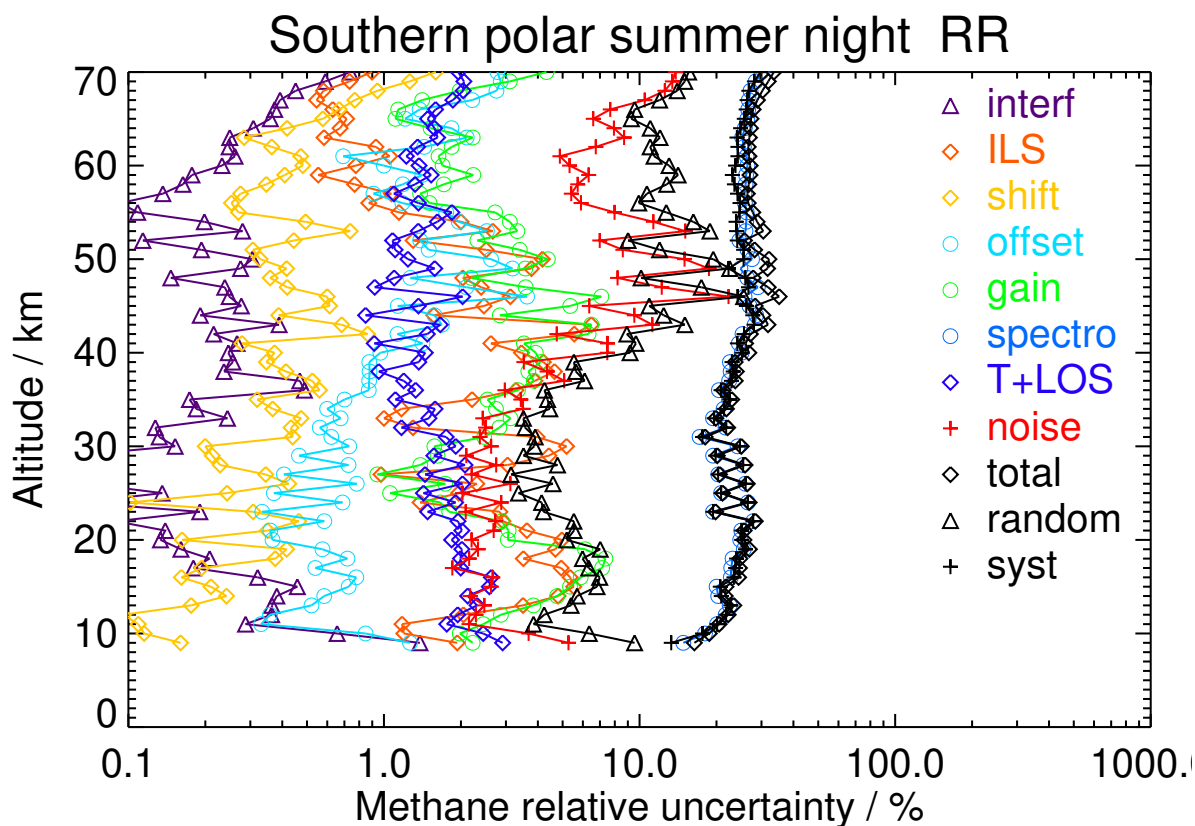

**Figure S66.** V8R\_CH4\_261 Southern polar summer night

**Table S67.** Methane error budget for Southern polar autumn day. All uncertainties are  $1\sigma$ .

| altitude<br>(km) | mean target<br>(ppbv) | interf<br>(ppbv) | ILS<br>(ppbv) | shift<br>(ppbv) | offset<br>(ppbv) | gain<br>(ppbv) | spectro<br>(ppbv) | T+LOS<br>(ppbv) | noise<br>(ppbv) | random<br>(ppbv) | syst<br>(ppbv) | total<br>(ppbv) |
|------------------|-----------------------|------------------|---------------|-----------------|------------------|----------------|-------------------|-----------------|-----------------|------------------|----------------|-----------------|
| 12               | 1802.40               | 9.82             | 41.08         | 1.61            | 5.72             | 55.81          | 390.19            | 33.68           | 36.21           | 56.97            | 395.45         | 399.54          |
| 15               | 1658.54               | 16.15            | 39.00         | 2.30            | 9.87             | 46.08          | 336.66            | 39.24           | 43.21           | 68.00            | 340.78         | 347.49          |
| 18               | 1464.13               | 7.07             | 27.17         | 4.60            | 6.27             | 75.76          | 346.54            | 27.77           | 31.46           | 56.33            | 353.93         | 358.39          |
| 21               | 1195.32               | 1.62             | 23.31         | 2.47            | 5.28             | 64.43          | 291.74            | 19.52           | 28.62           | 44.96            | 298.36         | 301.73          |
| 24               | 1065.32               | 1.48             | 9.45          | 2.14            | 8.73             | 43.88          | 252.43            | 24.09           | 43.01           | 55.10            | 255.37         | 261.24          |
| 27               | 866.97                | 1.40             | 8.26          | 0.91            | 5.02             | 17.43          | 202.70            | 17.45           | 30.52           | 40.65            | 202.66         | 206.70          |
| 30               | 667.87                | 0.98             | 14.71         | 2.04            | 8.82             | 9.11           | 170.40            | 19.98           | 35.95           | 49.34            | 169.34         | 176.38          |
| 33               | 428.95                | 1.67             | 4.96          | 1.56            | 6.00             | 8.17           | 109.38            | 13.71           | 28.54           | 40.61            | 107.00         | 114.45          |
| 36               | 191.99                | 0.89             | 6.55          | 0.85            | 3.99             | 7.71           | 51.57             | 6.76            | 22.14           | 30.46            | 48.86          | 57.57           |
| 39               | 80.41                 | 0.59             | 3.72          | 0.81            | 2.63             | 4.31           | 22.32             | 3.22            | 16.47           | 22.16            | 18.15          | 28.64           |
| 42               | 69.54                 | 0.29             | 1.67          | 0.49            | 2.22             | 3.27           | 19.51             | 2.10            | 13.00           | 17.69            | 16.11          | 23.93           |
| 45               | 92.77                 | 0.13             | 1.27          | 0.28            | 2.01             | 3.87           | 23.60             | 2.10            | 10.75           | 15.63            | 21.28          | 26.41           |
| 48               | 158.39                | 0.18             | 1.68          | 0.17            | 2.27             | 7.14           | 36.86             | 3.15            | 9.25            | 14.35            | 36.15          | 38.90           |
| 52               | 210.70                | 0.22             | 1.70          | 0.16            | 2.03             | 7.90           | 47.52             | 3.59            | 7.59            | 11.76            | 47.54          | 48.97           |
| 56               | 182.69                | 0.11             | 2.02          | 0.22            | 1.46             | 5.45           | 44.49             | 3.25            | 8.01            | 12.73            | 43.91          | 45.71           |
| 60               | 122.59                | 0.04             | 1.51          | 0.13            | 1.61             | 3.17           | 32.02             | 2.52            | 10.40           | 13.79            | 31.06          | 33.99           |
| 64               | 64.87                 | 0.17             | 0.77          | 0.11            | 2.79             | 1.37           | 18.45             | 1.39            | 13.73           | 15.64            | 17.23          | 23.27           |
| 68               | 31.88                 | 0.17             | 0.82          | 0.46            | 4.47             | 0.87           | 13.68             | 1.06            | 21.16           | 22.84            | 11.65          | 25.64           |

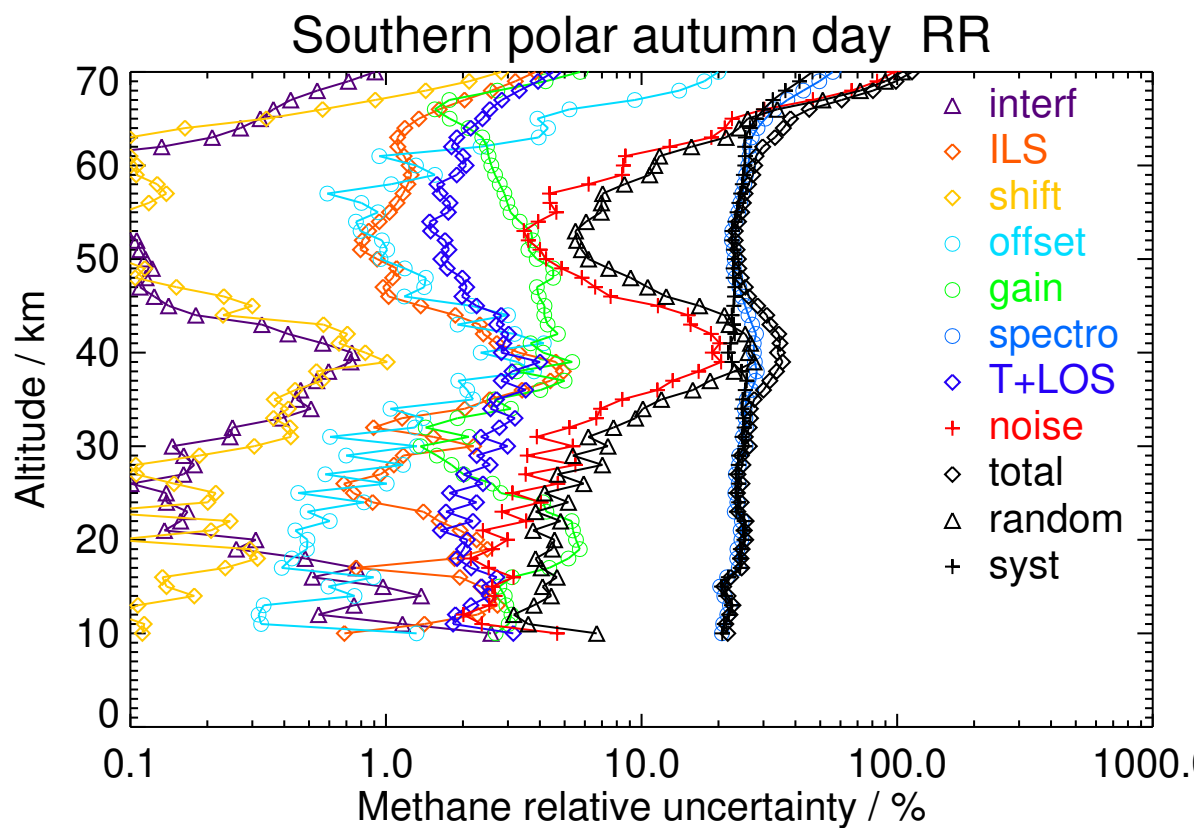

**Figure S67.** V8R\_CH4\_261 Southern polar autumn day

**Table S68.** Methane error budget for Southern polar autumn night. All uncertainties are  $1\sigma$ .

| altitude<br>(km) | mean target<br>(ppbv) | interf<br>(ppbv) | ILS<br>(ppbv) | shift<br>(ppbv) | offset<br>(ppbv) | gain<br>(ppbv) | spectro<br>(ppbv) | T+LOS<br>(ppbv) | noise<br>(ppbv) | random<br>(ppbv) | syst<br>(ppbv) | total<br>(ppbv) |
|------------------|-----------------------|------------------|---------------|-----------------|------------------|----------------|-------------------|-----------------|-----------------|------------------|----------------|-----------------|
| 9                | 1832.48               | 33.80            | 14.24         | 2.29            | 24.14            | 57.38          | 308.89            | 52.58           | 92.91           | 158.28           | 294.94         | 334.72          |
| 12               | 1766.14               | 9.57             | 39.15         | 1.56            | 5.91             | 62.32          | 387.13            | 36.03           | 39.65           | 66.99            | 392.17         | 397.85          |
| 15               | 1604.44               | 12.25            | 32.90         | 2.21            | 11.50            | 59.69          | 314.37            | 42.45           | 46.60           | 78.63            | 318.67         | 328.22          |
| 18               | 1383.84               | 6.07             | 22.16         | 2.91            | 8.23             | 93.24          | 292.98            | 30.98           | 33.55           | 65.38            | 304.87         | 311.80          |
| 21               | 1138.28               | 2.04             | 17.68         | 2.35            | 6.01             | 65.24          | 257.84            | 21.41           | 31.22           | 51.58            | 264.32         | 269.31          |
| 24               | 1016.33               | 1.33             | 13.95         | 2.11            | 8.83             | 38.77          | 237.93            | 24.40           | 43.89           | 60.59            | 239.26         | 246.81          |
| 27               | 795.27                | 1.21             | 9.58          | 0.90            | 5.08             | 13.68          | 186.09            | 17.44           | 30.62           | 42.02            | 185.51         | 190.21          |
| 30               | 595.02                | 0.89             | 8.85          | 1.16            | 8.58             | 9.27           | 159.52            | 18.75           | 34.43           | 48.60            | 157.67         | 164.99          |
| 33               | 324.63                | 1.58             | 6.16          | 1.39            | 5.83             | 12.21          | 84.65             | 11.30           | 26.06           | 40.70            | 80.88          | 90.54           |
| 36               | 132.26                | 0.74             | 5.32          | 0.91            | 3.70             | 6.37           | 37.71             | 5.15            | 19.59           | 27.81            | 33.80          | 43.77           |
| 39               | 59.49                 | 0.37             | 2.34          | 0.75            | 2.59             | 6.16           | 17.28             | 2.46            | 14.66           | 19.84            | 13.29          | 23.88           |
| 42               | 64.35                 | 0.20             | 1.62          | 0.43            | 2.06             | 2.71           | 16.71             | 1.95            | 11.82           | 14.87            | 14.70          | 20.91           |
| 45               | 115.55                | 0.14             | 0.98          | 0.30            | 2.14             | 5.39           | 28.52             | 2.47            | 10.53           | 15.06            | 27.17          | 31.07           |
| 48               | 175.25                | 0.18             | 1.69          | 0.13            | 2.30             | 8.02           | 40.31             | 3.53            | 9.14            | 12.49            | 40.46          | 42.34           |
| 52               | 194.81                | 0.21             | 1.80          | 0.22            | 1.87             | 7.75           | 45.40             | 3.42            | 7.34            | 11.79            | 45.33          | 46.84           |
| 56               | 145.90                | 0.11             | 1.88          | 0.24            | 1.31             | 4.16           | 36.80             | 2.72            | 7.36            | 12.65            | 35.75          | 37.92           |
| 60               | 96.87                 | 0.05             | 1.23          | 0.13            | 1.51             | 2.62           | 26.45             | 2.07            | 9.41            | 14.77            | 24.19          | 28.34           |
| 64               | 47.38                 | 0.17             | 0.63          | 0.08            | 2.67             | 1.02           | 14.15             | 1.17            | 12.96           | 14.91            | 12.49          | 19.45           |
| 68               | 26.13                 | 0.16             | 0.73          | 0.40            | 4.39             | 0.81           | 10.37             | 1.02            | 20.73           | 21.99            | 8.68           | 23.64           |

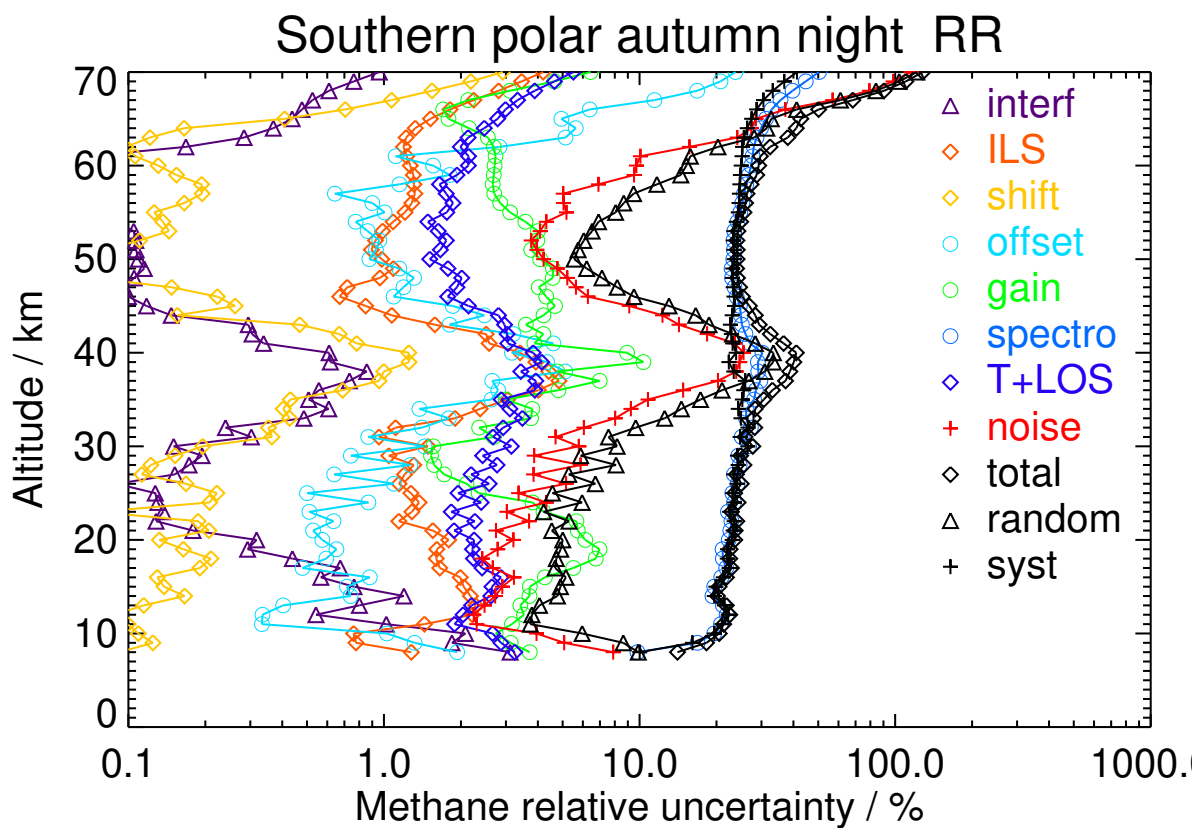

**Figure S68.** V8R\_CH4\_261 Southern polar autumn night



**Table S69.** Methane error budget for Northern polar winter day. All uncertainties are  $1\sigma$ .

| altitude (km) | mean target (ppbv) | NLTE (ppbv) | interf (ppbv) | ILS (ppbv) | shift (ppbv) | offset (ppbv) | gain (ppbv) | spectro (ppbv) | T+LOS (ppbv) | noise (ppbv) | random (ppbv) | syst (ppbv) | total (ppbv) |
|---------------|--------------------|-------------|---------------|------------|--------------|---------------|-------------|----------------|--------------|--------------|---------------|-------------|--------------|
| 30            | 1018.29            | 0.14        | 2.81          | 10.48      | 4.53         | 13.96         | 100.81      | 217.72         | 18.65        | 29.18        | 76.86         | 230.63      | 243.10       |
| 35            | 541.74             | 0.12        | 1.81          | 9.39       | 1.19         | 4.68          | 21.47       | 134.21         | 9.54         | 21.98        | 48.30         | 129.73      | 138.43       |
| 40            | 349.44             | 0.15        | 1.43          | 6.65       | 0.87         | 5.77          | 10.04       | 73.06          | 6.35         | 27.94        | 33.53         | 72.21       | 79.62        |
| 45            | 262.55             | 0.26        | 0.59          | 4.03       | 0.31         | 2.74          | 11.37       | 52.90          | 5.06         | 18.73        | 22.69         | 53.04       | 57.69        |
| 50            | 157.78             | 0.34        | 0.16          | 1.31       | 0.08         | 2.48          | 4.70        | 35.00          | 3.80         | 14.24        | 16.02         | 34.87       | 38.37        |
| 55            | 139.06             | 0.38        | 0.04          | 0.87       | 0.08         | 2.45          | 3.08        | 32.59          | 3.45         | 14.76        | 15.80         | 32.54       | 36.17        |
| 60            | 72.78              | 0.21        | 0.07          | 0.87       | 0.05         | 1.62          | 1.31        | 19.07          | 2.04         | 14.45        | 15.66         | 18.35       | 24.12        |
| 65            | 22.00              | 0.10        | 0.12          | 0.44       | 0.07         | 1.86          | 0.46        | 7.93           | 0.81         | 17.94        | 18.61         | 6.57        | 19.73        |
| 70            | 13.10              | 0.13        | 0.19          | 0.45       | 0.16         | 3.22          | 0.92        | 6.43           | 0.67         | 22.88        | 23.51         | 4.89        | 24.01        |
| 74            | -3.82              | 0.18        | 0.29          | 0.73       | 0.22         | 6.96          | 1.35        | 6.34           | 0.60         | 32.82        | 33.84         | 4.82        | 34.19        |
| 80            | -14.45             | 0.28        | 0.44          | 1.11       | 0.22         | 11.74         | 2.28        | 6.91           | 0.46         | 45.30        | 47.03         | 5.70        | 47.37        |
| 84            | -9.89              | 0.19        | 0.25          | 0.81       | 0.13         | 8.42          | 1.41        | 3.80           | 0.17         | 30.81        | 32.01         | 3.54        | 32.21        |

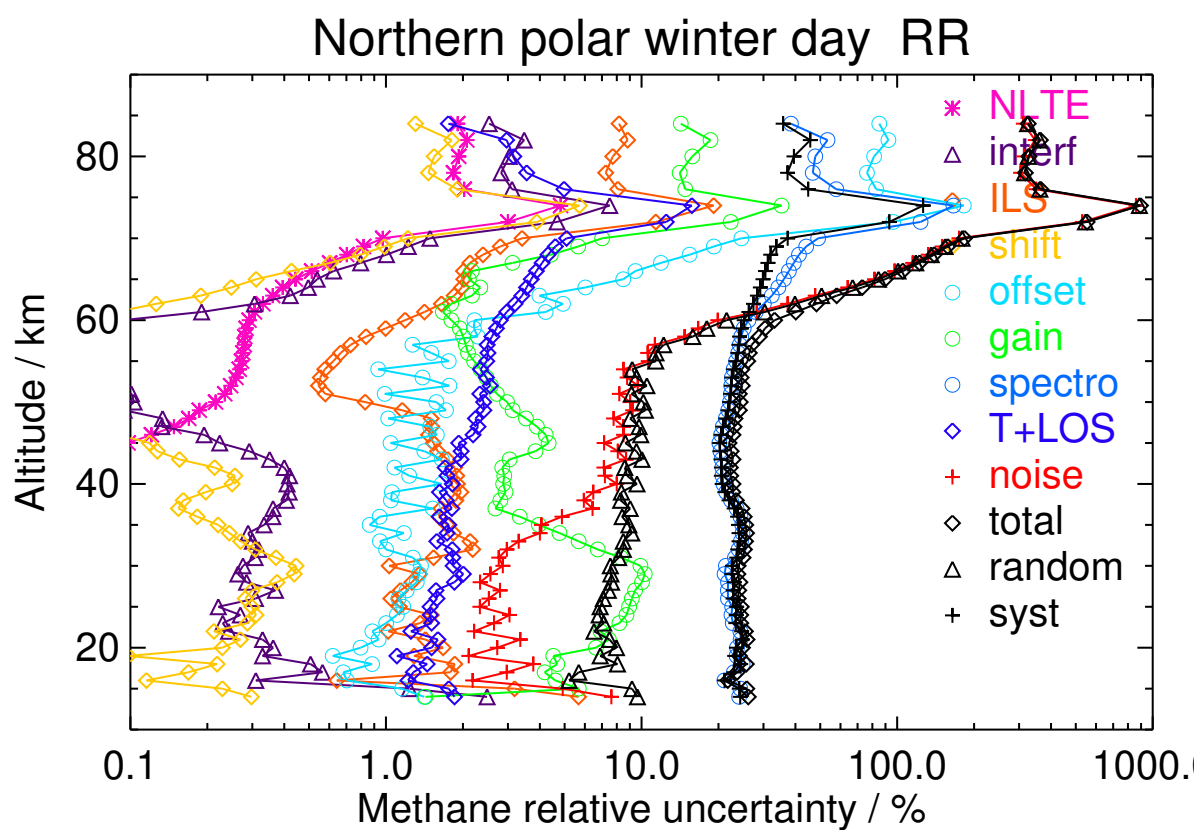

**Figure S69.** V8R\_CH4\_561 Northern polar winter day

**Table S70.** Methane error budget for Northern polar winter night. All uncertainties are  $1\sigma$ .

| altitude (km) | mean target (ppbv) | NLTE (ppbv) | interf (ppbv) | ILS (ppbv) | shift (ppbv) | offset (ppbv) | gain (ppbv) | spectro (ppbv) | T+LOS (ppbv) | noise (ppbv) | random (ppbv) | syst (ppbv) | total (ppbv) |
|---------------|--------------------|-------------|---------------|------------|--------------|---------------|-------------|----------------|--------------|--------------|---------------|-------------|--------------|
| 30            | 462.00             | 0.09        | 1.31          | 5.54       | 2.64         | 9.92          | 64.06       | 152.67         | 11.46        | 27.11        | 116.39        | 121.94      | 168.57       |
| 35            | 343.86             | 0.08        | 2.36          | 6.59       | 1.05         | 5.09          | 19.57       | 94.88          | 6.82         | 24.48        | 56.70         | 83.02       | 100.53       |
| 40            | 233.95             | 0.09        | 1.09          | 5.85       | 1.00         | 4.89          | 12.26       | 62.29          | 5.29         | 22.28        | 37.08         | 56.92       | 67.93        |
| 45            | 176.89             | 0.13        | 0.40          | 3.42       | 0.26         | 2.15          | 7.32        | 43.62          | 3.45         | 14.41        | 21.81         | 41.43       | 46.82        |
| 50            | 145.89             | 0.19        | 0.12          | 1.44       | 0.12         | 1.91          | 4.70        | 34.40          | 2.78         | 10.54        | 12.49         | 34.27       | 36.48        |
| 55            | 122.38             | 0.24        | 0.05          | 1.25       | 0.07         | 1.97          | 2.52        | 29.36          | 2.60         | 11.35        | 12.79         | 29.08       | 31.77        |
| 60            | 76.78              | 0.27        | 0.07          | 1.23       | 0.04         | 2.10          | 1.46        | 19.51          | 1.68         | 12.84        | 14.03         | 18.96       | 23.59        |
| 65            | 41.87              | 0.29        | 0.10          | 0.68       | 0.11         | 1.57          | 0.77        | 12.54          | 1.07         | 15.80        | 17.04         | 11.02       | 20.29        |
| 70            | 31.38              | 0.31        | 0.12          | 0.31       | 0.31         | 3.02          | 0.83        | 11.24          | 1.05         | 21.51        | 22.79         | 8.98        | 24.50        |
| 74            | 7.45               | 0.38        | 0.29          | 0.79       | 0.93         | 6.69          | 1.53        | 11.19          | 1.08         | 32.87        | 34.41         | 8.46        | 35.43        |
| 80            | -7.34              | 0.64        | 0.56          | 1.71       | 1.85         | 10.51         | 3.39        | 11.78          | 1.02         | 43.04        | 45.20         | 8.88        | 46.06        |
| 84            | 1.86               | 0.59        | 0.18          | 0.81       | 0.31         | 8.16          | 1.02        | 4.03           | 0.25         | 30.76        | 31.99         | 2.82        | 32.11        |

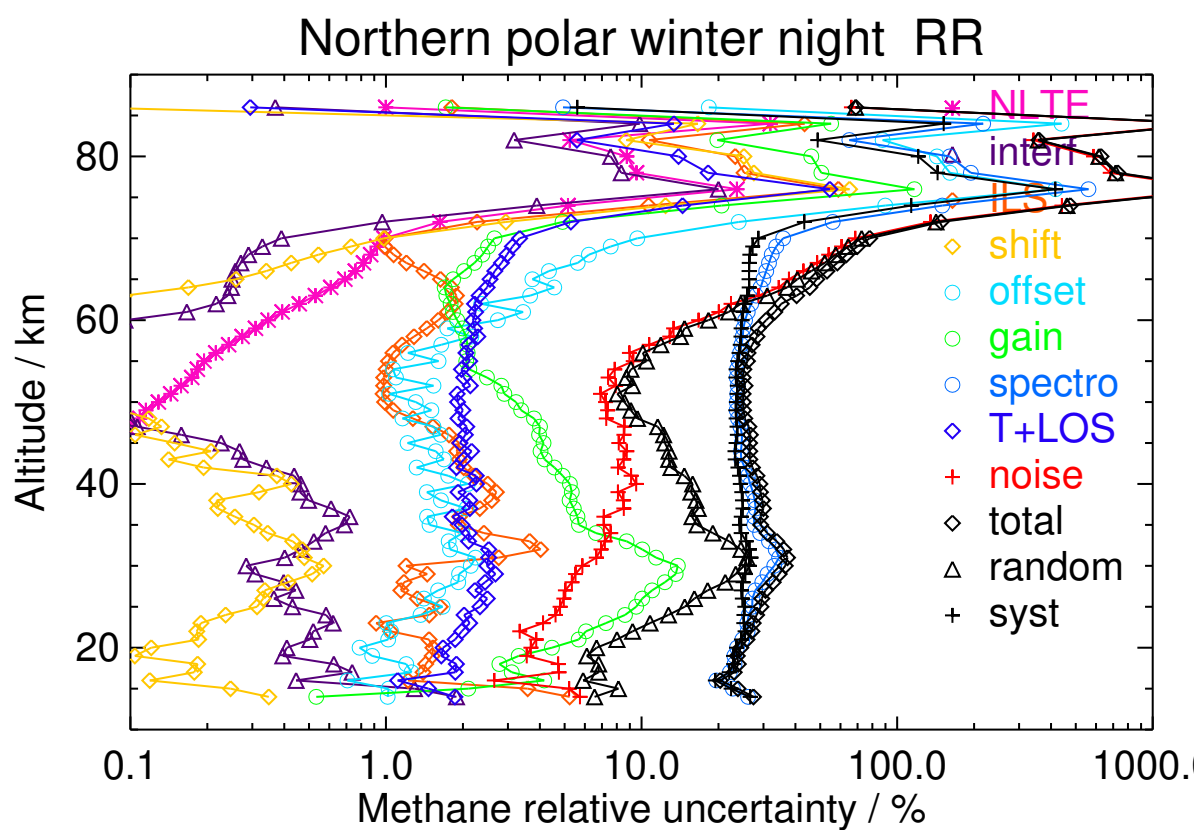

**Figure S70.** V8R\_CH4\_561 Northern polar winter night

**Table S71.** Methane error budget for Northern polar spring day. All uncertainties are  $1\sigma$ .

| altitude<br>(km) | mean target<br>(ppbv) | NLTE<br>(ppbv) | interf<br>(ppbv) | ILS<br>(ppbv) | shift<br>(ppbv) | offset<br>(ppbv) | gain<br>(ppbv) | spectro<br>(ppbv) | T+LOS<br>(ppbv) | noise<br>(ppbv) | random<br>(ppbv) | syst<br>(ppbv) | total<br>(ppbv) |
|------------------|-----------------------|----------------|------------------|---------------|-----------------|------------------|----------------|-------------------|-----------------|-----------------|------------------|----------------|-----------------|
| 30               | 765.65                | 0.03           | 0.84             | 11.52         | 2.03            | 6.67             | 14.44          | 187.72            | 15.59           | 27.25           | 39.47            | 187.24         | 191.35          |
| 35               | 390.88                | 0.06           | 0.71             | 4.15          | 1.28            | 4.31             | 10.31          | 92.16             | 8.95            | 24.81           | 30.37            | 91.71          | 96.61           |
| 40               | 259.66                | 0.11           | 0.72             | 3.21          | 1.46            | 3.15             | 6.20           | 56.34             | 4.28            | 14.15           | 17.22            | 56.19          | 58.77           |
| 45               | 141.75                | 0.11           | 0.30             | 2.40          | 0.32            | 1.92             | 3.67           | 34.74             | 1.66            | 11.12           | 17.34            | 32.49          | 36.83           |
| 50               | 94.63                 | 0.14           | 0.13             | 1.11          | 0.16            | 1.25             | 2.48           | 27.21             | 1.25            | 7.31            | 18.06            | 21.87          | 28.36           |
| 55               | 93.92                 | 0.16           | 0.05             | 1.14          | 0.10            | 1.17             | 1.70           | 25.17             | 1.49            | 5.65            | 13.27            | 22.29          | 25.95           |
| 60               | 76.92                 | 0.19           | 0.09             | 1.12          | 0.07            | 2.35             | 1.38           | 21.06             | 1.28            | 9.21            | 13.77            | 18.69          | 23.21           |
| 65               | 49.16                 | 0.14           | 0.11             | 0.52          | 0.09            | 0.72             | 0.76           | 13.55             | 0.91            | 10.71           | 12.48            | 12.02          | 17.33           |
| 70               | 26.84                 | 0.15           | 0.19             | 1.01          | 0.39            | 1.99             | 1.54           | 9.51              | 0.76            | 18.02           | 18.95            | 7.99           | 20.57           |
| 74               | 1.25                  | 0.52           | 0.74             | 3.48          | 1.84            | 4.76             | 7.09           | 16.22             | 1.15            | 29.03           | 31.85            | 13.49          | 34.59           |
| 80               | -19.95                | 1.00           | 1.55             | 6.32          | 4.27            | 9.20             | 13.42          | 29.82             | 1.38            | 43.72           | 49.05            | 26.89          | 55.94           |
| 84               | -14.14                | 0.67           | 1.04             | 4.11          | 2.97            | 6.52             | 8.93           | 20.12             | 0.59            | 29.06           | 32.15            | 19.12          | 37.41           |

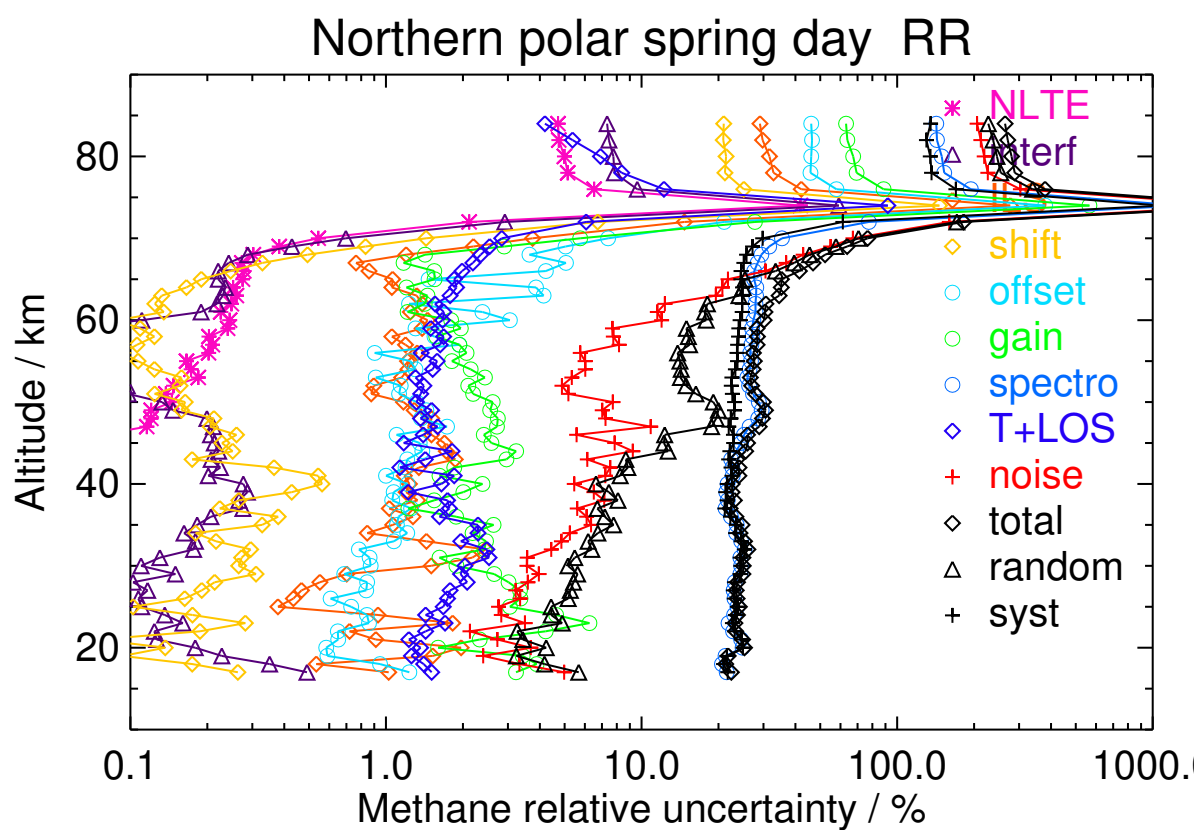

**Figure S71.** V8R\_CH4\_561 Northern polar spring day

**Table S72.** Methane error budget for Northern polar spring night. All uncertainties are  $1\sigma$ .

| altitude (km) | mean target (ppbv) | NLTE (ppbv) | interf (ppbv) | ILS (ppbv) | shift (ppbv) | offset (ppbv) | gain (ppbv) | spectro (ppbv) | T+LOS (ppbv) | noise (ppbv) | random (ppbv) | syst (ppbv) | total (ppbv) |
|---------------|--------------------|-------------|---------------|------------|--------------|---------------|-------------|----------------|--------------|--------------|---------------|-------------|--------------|
| 30            | 778.91             | 0.01        | 0.74          | 11.37      | 2.11         | 6.28          | 10.85       | 191.70         | 15.19        | 26.51        | 40.76         | 190.56      | 194.87       |
| 35            | 434.18             | 0.03        | 0.71          | 2.93       | 1.32         | 4.22          | 10.53       | 102.61         | 9.37         | 23.28        | 29.18         | 102.21      | 106.29       |
| 40            | 301.07             | 0.08        | 0.82          | 2.61       | 1.65         | 3.46          | 6.63        | 65.90          | 4.82         | 14.99        | 18.18         | 65.77       | 68.24        |
| 45            | 167.06             | 0.08        | 0.36          | 2.81       | 0.36         | 1.90          | 4.49        | 39.69          | 1.94         | 11.44        | 17.42         | 37.92       | 41.73        |
| 50            | 115.09             | 0.09        | 0.11          | 1.25       | 0.09         | 1.26          | 2.53        | 29.88          | 1.53         | 7.64         | 16.45         | 26.31       | 31.03        |
| 55            | 106.09             | 0.13        | 0.04          | 1.33       | 0.08         | 1.38          | 1.95        | 26.70          | 1.81         | 6.39         | 11.73         | 25.04       | 27.65        |
| 60            | 73.75              | 0.13        | 0.10          | 1.19       | 0.08         | 2.34          | 1.29        | 20.17          | 1.34         | 9.56         | 13.16         | 18.31       | 22.55        |
| 65            | 46.86              | 0.11        | 0.12          | 0.72       | 0.11         | 0.91          | 0.74        | 12.62          | 1.01         | 11.47        | 12.75         | 11.46       | 17.14        |
| 70            | 20.73              | 0.12        | 0.22          | 1.06       | 0.51         | 2.07          | 1.67        | 9.74           | 0.89         | 18.90        | 19.84         | 8.24        | 21.48        |
| 74            | -0.70              | 0.29        | 0.67          | 2.83       | 1.81         | 5.22          | 5.48        | 15.23          | 1.40         | 30.50        | 32.18         | 14.06       | 35.12        |
| 80            | -27.86             | 0.57        | 1.42          | 5.08       | 4.17         | 9.11          | 10.48       | 27.78          | 1.83         | 43.58        | 46.49         | 27.41       | 53.97        |
| 84            | -20.53             | 0.37        | 0.94          | 3.25       | 2.84         | 6.40          | 7.54        | 19.33          | 0.83         | 28.46        | 30.71         | 18.94       | 36.08        |

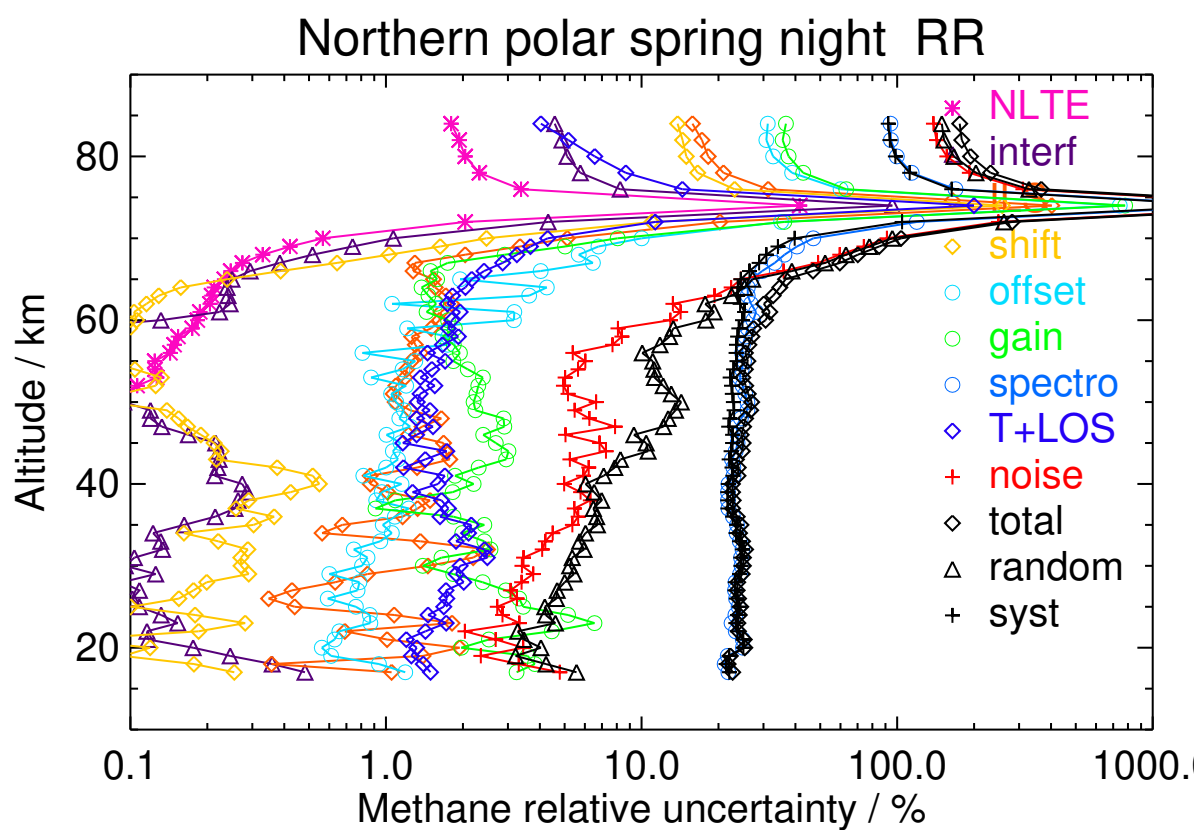

**Figure S72.** V8R\_CH4\_561 Northern polar spring night

**Table S73.** Methane error budget for Northern polar summer day. All uncertainties are  $1\sigma$ .

| altitude (km) | mean target (ppbv) | NLTE (ppbv) | interf (ppbv) | ILS (ppbv) | shift (ppbv) | offset (ppbv) | gain (ppbv) | spectro (ppbv) | T+LOS (ppbv) | noise (ppbv) | random (ppbv) | syst (ppbv) | total (ppbv) |
|---------------|--------------------|-------------|---------------|------------|--------------|---------------|-------------|----------------|--------------|--------------|---------------|-------------|--------------|
| 30            | 872.13             | 0.03        | 1.01          | 17.05      | 2.02         | 7.13          | 31.26       | 234.46         | 13.42        | 26.67        | 36.22         | 236.37      | 239.13       |
| 35            | 528.48             | 0.03        | 0.68          | 5.58       | 1.85         | 4.76          | 9.68        | 128.81         | 9.86         | 23.92        | 28.30         | 128.89      | 131.96       |
| 40            | 256.10             | 0.06        | 0.69          | 1.94       | 0.98         | 2.81          | 4.90        | 51.35          | 3.38         | 12.96        | 15.40         | 51.15       | 53.42        |
| 45            | 134.23             | 0.05        | 0.27          | 2.59       | 0.47         | 2.21          | 3.71        | 30.10          | 1.32         | 13.73        | 15.27         | 29.82       | 33.50        |
| 50            | 72.86              | 0.04        | 0.11          | 0.91       | 0.17         | 1.82          | 1.02        | 17.14          | 0.88         | 10.75        | 11.77         | 16.64       | 20.38        |
| 55            | 56.03              | 0.05        | 0.04          | 0.72       | 0.05         | 0.97          | 0.83        | 13.84          | 0.73         | 4.47         | 5.49          | 13.57       | 14.64        |
| 60            | 68.01              | 0.11        | 0.09          | 0.79       | 0.11         | 1.80          | 1.15        | 18.15          | 0.94         | 6.42         | 10.82         | 16.12       | 19.41        |
| 65            | 63.20              | 0.11        | 0.13          | 0.70       | 0.09         | 0.71          | 1.13        | 16.35          | 0.92         | 8.06         | 9.82          | 15.45       | 18.31        |
| 70            | 70.70              | 0.19        | 0.15          | 1.31       | 0.36         | 2.35          | 0.82        | 17.95          | 1.16         | 16.75        | 17.87         | 17.12       | 24.74        |
| 74            | 54.12              | 0.77        | 1.05          | 3.54       | 2.03         | 2.75          | 6.09        | 25.92          | 0.74         | 25.53        | 27.17         | 25.48       | 37.24        |
| 80            | 21.31              | 1.28        | 2.60          | 3.79       | 7.84         | 6.24          | 13.06       | 48.12          | 0.24         | 39.53        | 42.90         | 48.28       | 64.59        |
| 84            | 5.78               | 0.81        | 1.76          | 1.96       | 5.97         | 5.30          | 8.52        | 32.93          | 0.22         | 30.85        | 32.79         | 33.25       | 46.69        |

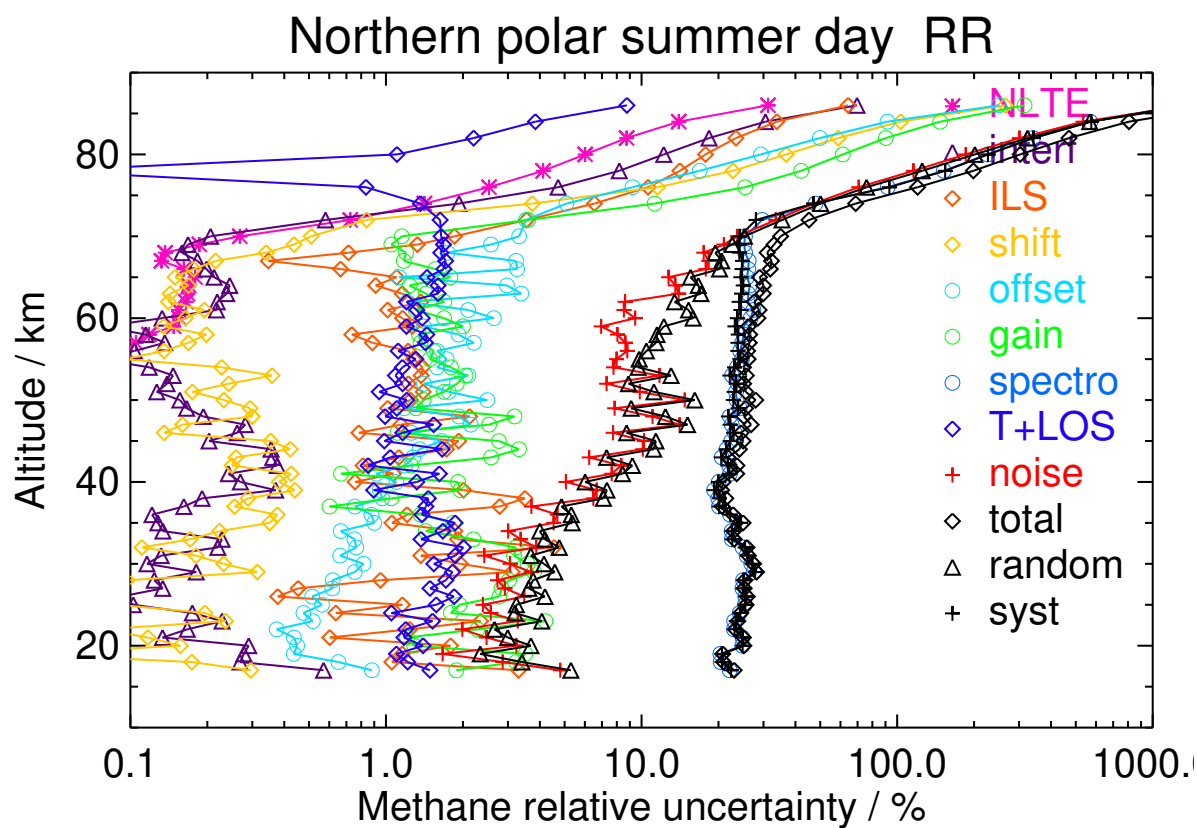

**Figure S73.** V8R\_CH4\_561 Northern polar summer day

**Table S74.** Methane error budget for Northern polar summer night. All uncertainties are  $1\sigma$ .

| altitude (km) | mean target (ppbv) | NLTE (ppbv) | interf (ppbv) | ILS (ppbv) | shift (ppbv) | offset (ppbv) | gain (ppbv) | spectro (ppbv) | T+LOS (ppbv) | noise (ppbv) | random (ppbv) | syst (ppbv) | total (ppbv) |
|---------------|--------------------|-------------|---------------|------------|--------------|---------------|-------------|----------------|--------------|--------------|---------------|-------------|--------------|
| 30            | 794.31             | 0.02        | 1.15          | 4.86       | 2.86         | 7.07          | 25.67       | 204.49         | 13.03        | 27.19        | 37.86         | 205.03      | 208.49       |
| 35            | 402.52             | 0.02        | 0.62          | 3.68       | 1.34         | 4.41          | 11.55       | 97.30          | 8.52         | 23.12        | 27.27         | 97.47       | 101.21       |
| 40            | 185.72             | 0.05        | 0.66          | 1.60       | 0.80         | 2.71          | 3.79        | 39.13          | 2.72         | 12.89        | 15.83         | 38.46       | 41.59        |
| 45            | 83.53              | 0.04        | 0.18          | 1.97       | 0.30         | 1.79          | 2.84        | 20.08          | 1.03         | 11.07        | 14.00         | 18.61       | 23.29        |
| 50            | 67.24              | 0.03        | 0.08          | 0.62       | 0.09         | 1.08          | 1.04        | 16.42          | 0.78         | 6.61         | 8.94          | 15.38       | 17.79        |
| 55            | 82.53              | 0.09        | 0.09          | 0.71       | 0.14         | 1.34          | 1.48        | 21.69          | 1.45         | 6.38         | 12.61         | 18.93       | 22.75        |
| 60            | 167.97             | 0.25        | 0.17          | 1.95       | 0.18         | 2.70          | 2.92        | 40.19          | 3.06         | 10.48        | 17.62         | 38.00       | 41.88        |
| 65            | 167.45             | 0.19        | 0.18          | 1.13       | 0.21         | 2.14          | 2.37        | 40.89          | 3.33         | 13.01        | 15.84         | 40.17       | 43.17        |
| 70            | 149.99             | 0.46        | 0.44          | 1.89       | 0.79         | 3.17          | 1.08        | 39.81          | 3.51         | 20.94        | 22.93         | 39.06       | 45.29        |
| 74            | 98.97              | 1.12        | 1.26          | 2.53       | 2.51         | 5.25          | 5.71        | 41.99          | 2.42         | 31.75        | 34.04         | 41.16       | 53.41        |
| 80            | 25.41              | 1.20        | 1.93          | 2.39       | 4.71         | 8.51          | 9.31        | 41.05          | 0.45         | 44.02        | 46.09         | 41.12       | 61.77        |
| 84            | 3.30               | 0.66        | 1.18          | 1.20       | 3.36         | 5.93          | 5.89        | 24.55          | 0.01         | 28.84        | 30.23         | 24.60       | 38.97        |

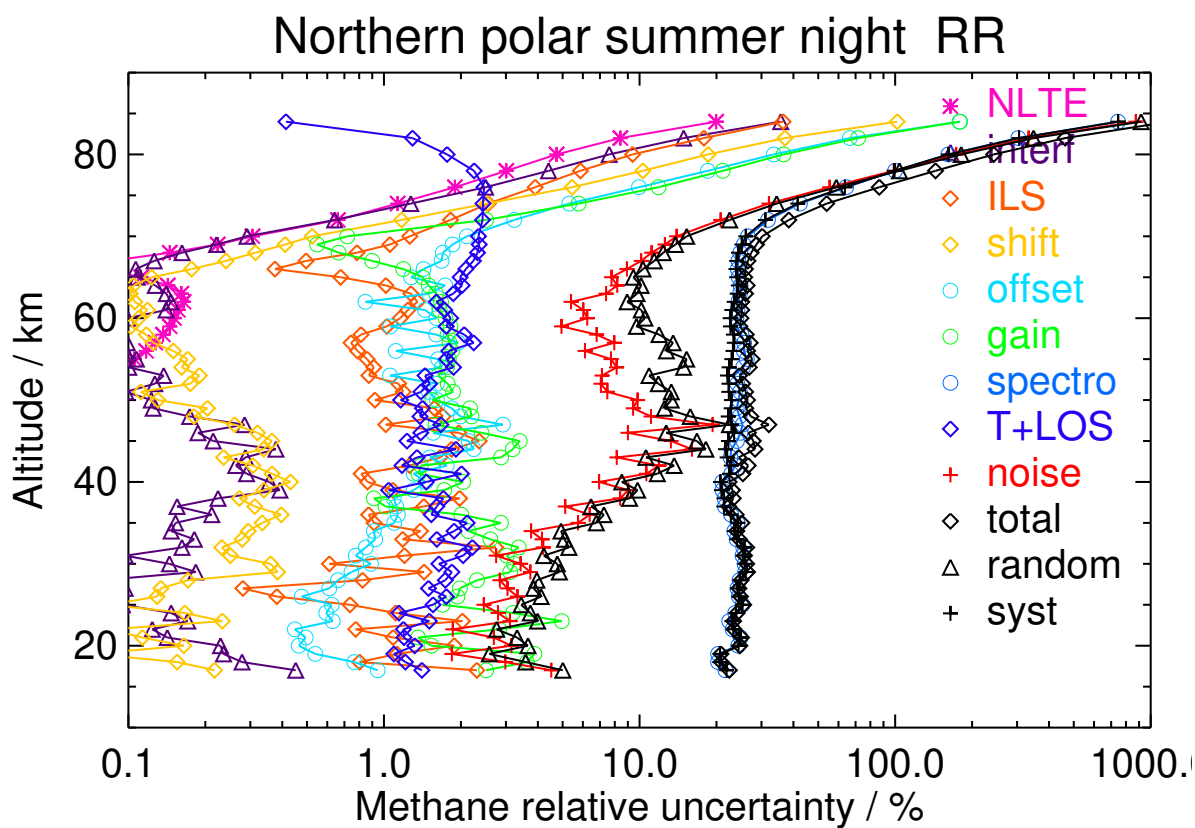

**Figure S74.** V8R\_CH4\_561 Northern polar summer night

**Table S75.** Methane error budget for Northern polar autumn day. All uncertainties are  $1\sigma$ .

| altitude (km) | mean target (ppbv) | NLTE (ppbv) | interf (ppbv) | ILS (ppbv) | shift (ppbv) | offset (ppbv) | gain (ppbv) | spectro (ppbv) | T+LOS (ppbv) | noise (ppbv) | random (ppbv) | syst (ppbv) | total (ppbv) |
|---------------|--------------------|-------------|---------------|------------|--------------|---------------|-------------|----------------|--------------|--------------|---------------|-------------|--------------|
| 30            | 616.51             | 0.04        | 1.52          | 4.58       | 1.57         | 5.74          | 12.43       | 157.79         | 12.51        | 25.91        | 45.51         | 154.49      | 161.06       |
| 35            | 188.08             | 0.03        | 1.38          | 2.51       | 0.72         | 3.52          | 11.90       | 52.15          | 6.74         | 22.08        | 30.01         | 50.15       | 58.44        |
| 40            | 82.64              | 0.05        | 0.62          | 2.11       | 0.58         | 2.60          | 2.69        | 21.11          | 2.08         | 12.34        | 17.39         | 17.86       | 24.93        |
| 45            | 88.40              | 0.10        | 0.29          | 1.02       | 0.15         | 1.53          | 2.64        | 22.71          | 1.89         | 9.02         | 14.72         | 19.87       | 24.73        |
| 50            | 175.14             | 0.30        | 0.19          | 1.08       | 0.12         | 1.44          | 3.79        | 40.30          | 2.85         | 7.92         | 11.57         | 39.74       | 41.39        |
| 55            | 208.89             | 0.52        | 0.08          | 2.20       | 0.13         | 2.15          | 4.47        | 48.39          | 4.14         | 10.75        | 12.79         | 48.38       | 50.04        |
| 60            | 180.45             | 0.58        | 0.13          | 2.45       | 0.10         | 2.71          | 3.26        | 43.82          | 3.34         | 12.33        | 14.91         | 43.42       | 45.91        |
| 65            | 104.56             | 0.42        | 0.12          | 1.38       | 0.12         | 1.31          | 1.53        | 27.01          | 2.27         | 13.79        | 15.78         | 26.12       | 30.52        |
| 70            | 47.56              | 0.25        | 0.15          | 0.45       | 0.30         | 2.51          | 0.84        | 14.52          | 1.40         | 19.59        | 20.51         | 13.53       | 24.57        |
| 74            | 12.90              | 0.46        | 0.52          | 1.33       | 0.97         | 5.71          | 3.86        | 11.71          | 1.58         | 31.69        | 33.05         | 10.11       | 34.56        |
| 80            | -4.33              | 1.02        | 1.19          | 3.24       | 2.33         | 9.36          | 8.51        | 15.06          | 2.20         | 43.59        | 45.89         | 14.29       | 48.06        |
| 84            | -13.57             | 0.29        | 0.21          | 0.28       | 0.76         | 7.13          | 1.37        | 3.02           | 0.51         | 28.50        | 29.39         | 3.33        | 29.58        |

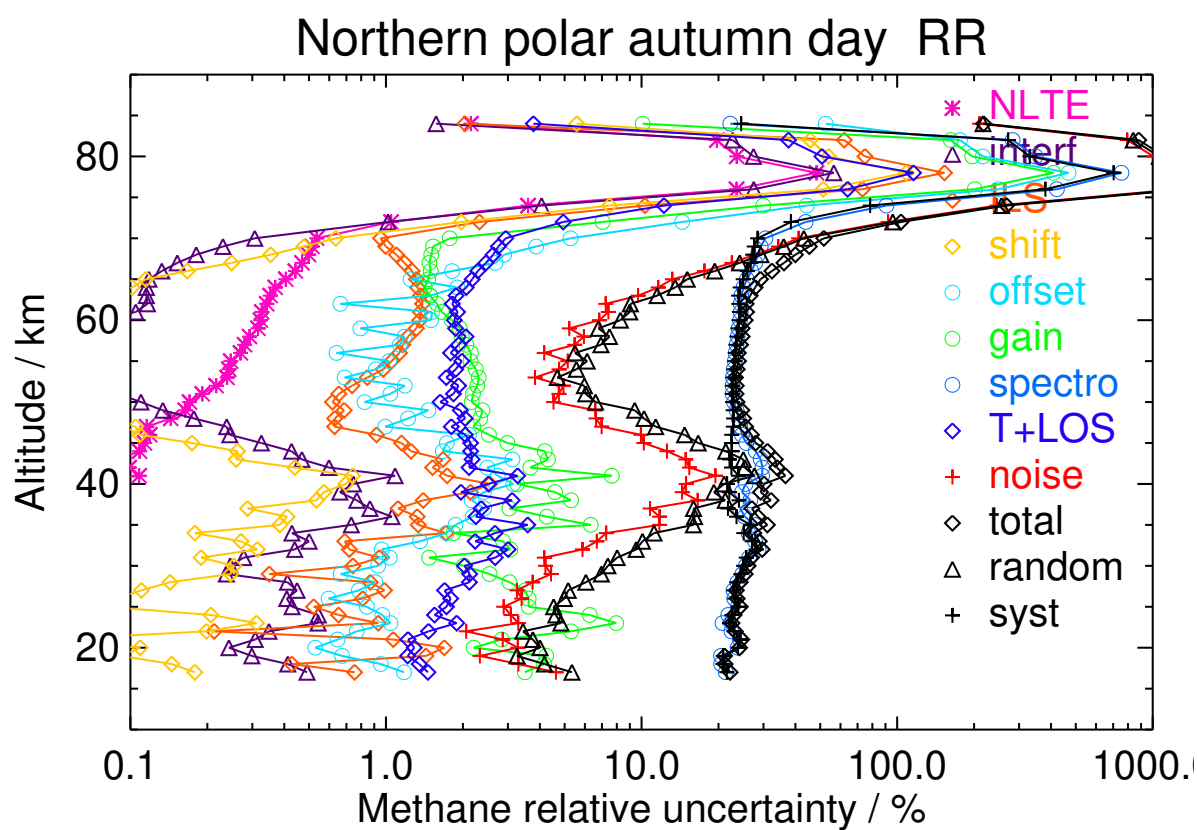

**Figure S75.** V8R\_CH4\_561 Northern polar autumn day



**Table S76.** Methane error budget for Northern polar autumn night. All uncertainties are  $1\sigma$ .

| altitude (km) | mean target (ppbv) | NLTE (ppbv) | interf (ppbv) | ILS (ppbv) | shift (ppbv) | offset (ppbv) | gain (ppbv) | spectro (ppbv) | T+LOS (ppbv) | noise (ppbv) | random (ppbv) | syst (ppbv) | total (ppbv) |
|---------------|--------------------|-------------|---------------|------------|--------------|---------------|-------------|----------------|--------------|--------------|---------------|-------------|--------------|
| 30            | 540.35             | 0.06        | 1.28          | 1.86       | 1.18         | 5.01          | 10.44       | 140.68         | 11.47        | 25.57        | 35.19         | 139.56      | 143.93       |
| 35            | 165.22             | 0.04        | 1.31          | 2.45       | 0.50         | 2.99          | 6.43        | 43.85          | 5.89         | 20.47        | 25.08         | 42.49       | 49.34        |
| 40            | 58.93              | 0.05        | 0.55          | 1.09       | 0.42         | 2.89          | 1.49        | 14.99          | 1.88         | 14.32        | 16.18         | 13.56       | 21.11        |
| 45            | 102.06             | 0.06        | 0.32          | 0.73       | 0.21         | 1.36          | 2.06        | 23.72          | 2.26         | 9.81         | 13.43         | 22.14       | 25.89        |
| 50            | 176.03             | 0.23        | 0.18          | 1.42       | 0.10         | 1.60          | 3.76        | 39.19          | 2.98         | 8.34         | 10.25         | 39.09       | 40.41        |
| 55            | 192.85             | 0.39        | 0.07          | 2.06       | 0.10         | 2.22          | 3.99        | 44.32          | 4.02         | 10.88        | 13.14         | 44.17       | 46.09        |
| 60            | 169.21             | 0.50        | 0.10          | 2.74       | 0.07         | 2.30          | 3.05        | 40.70          | 3.17         | 11.24        | 13.99         | 40.25       | 42.61        |
| 65            | 89.54              | 0.39        | 0.12          | 1.47       | 0.09         | 1.62          | 1.35        | 23.40          | 2.24         | 14.19        | 15.71         | 22.67       | 27.58        |
| 70            | 39.44              | 0.27        | 0.14          | 0.44       | 0.33         | 2.58          | 0.57        | 13.85          | 1.50         | 20.00        | 21.00         | 12.67       | 24.53        |
| 74            | 9.58               | 0.26        | 0.31          | 0.60       | 0.85         | 6.15          | 1.37        | 12.82          | 1.62         | 32.71        | 34.12         | 10.64       | 35.74        |
| 80            | -7.35              | 0.64        | 0.77          | 2.02       | 2.24         | 9.41          | 3.88        | 16.96          | 2.46         | 43.29        | 45.22         | 15.39       | 47.76        |
| 84            | 23.95              | 0.18        | 0.23          | 0.20       | 0.73         | 7.37          | 0.65        | 8.44           | 0.86         | 29.52        | 30.46         | 8.42        | 31.60        |

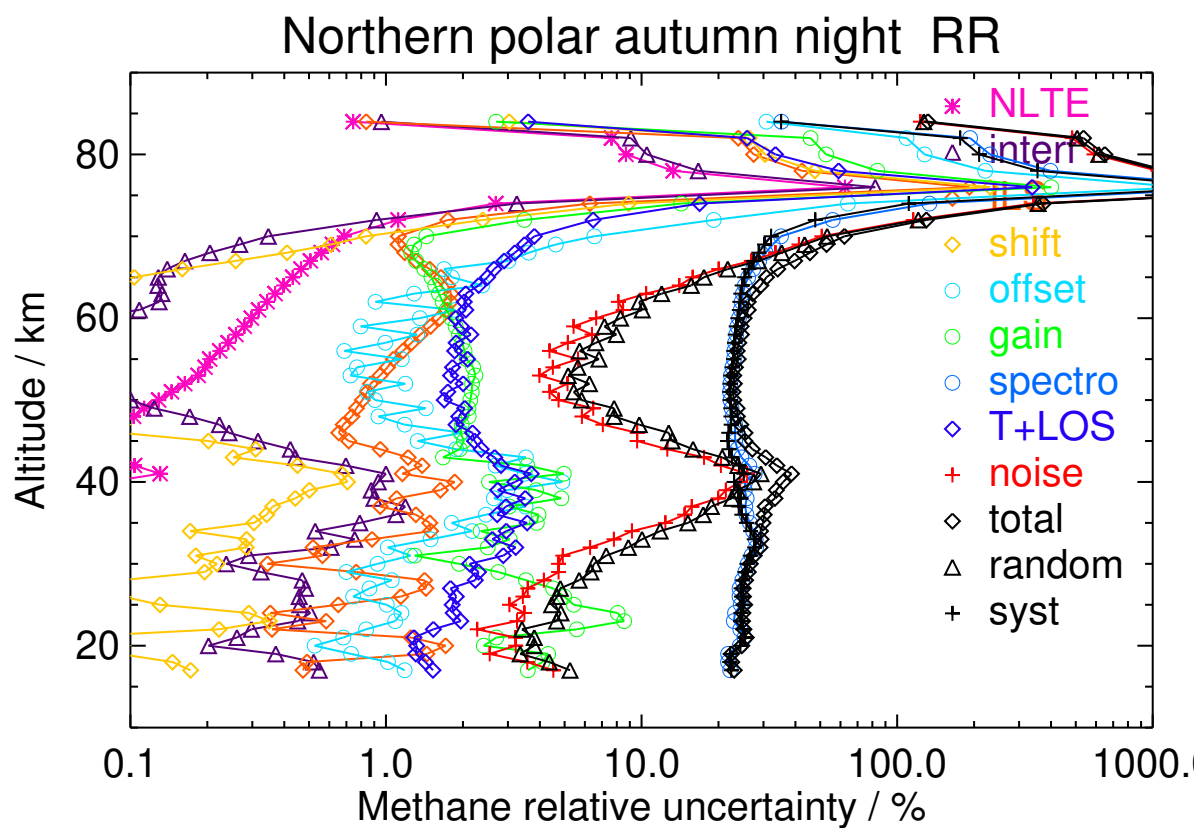

**Figure S76.** V8R\_CH4\_561 Northern polar autumn night

**Table S77.** Methane error budget for Northern midlatitude winter day. All uncertainties are  $1\sigma$ .

| altitude (km) | mean target (ppbv) | NLTE (ppbv) | interf (ppbv) | ILS (ppbv) | shift (ppbv) | offset (ppbv) | gain (ppbv) | spectro (ppbv) | T+LOS (ppbv) | noise (ppbv) | random (ppbv) | syst (ppbv) | total (ppbv) |
|---------------|--------------------|-------------|---------------|------------|--------------|---------------|-------------|----------------|--------------|--------------|---------------|-------------|--------------|
| 30            | 923.07             | 0.05        | 4.92          | 20.35      | 1.26         | 7.22          | 30.56       | 233.01         | 16.63        | 30.15        | 70.77         | 227.81      | 238.55       |
| 35            | 568.11             | 0.11        | 2.09          | 9.33       | 1.48         | 4.45          | 11.74       | 139.48         | 9.53         | 20.16        | 41.02         | 136.09      | 142.13       |
| 40            | 355.33             | 0.14        | 1.83          | 2.71       | 1.15         | 4.68          | 5.31        | 71.88          | 5.11         | 20.34        | 25.86         | 70.71       | 75.29        |
| 45            | 296.43             | 0.29        | 1.17          | 3.26       | 0.37         | 1.80          | 7.20        | 63.22          | 3.63         | 12.28        | 18.88         | 62.22       | 65.02        |
| 50            | 173.37             | 0.32        | 0.33          | 1.27       | 0.16         | 1.58          | 4.00        | 38.11          | 2.99         | 8.67         | 11.82         | 37.64       | 39.45        |
| 55            | 153.19             | 0.35        | 0.07          | 1.44       | 0.10         | 2.16          | 3.15        | 35.67          | 3.06         | 10.25        | 11.71         | 35.59       | 37.46        |
| 60            | 122.74             | 0.31        | 0.11          | 1.49       | 0.11         | 1.94          | 1.96        | 30.02          | 2.27         | 10.64        | 12.32         | 29.63       | 32.09        |
| 65            | 64.47              | 0.17        | 0.19          | 0.71       | 0.15         | 1.99          | 0.81        | 16.88          | 1.56         | 14.59        | 15.67         | 16.12       | 22.48        |
| 70            | 28.38              | 0.19        | 0.56          | 0.62       | 0.43         | 2.14          | 2.36        | 10.34          | 1.24         | 19.99        | 20.78         | 9.35        | 22.78        |
| 74            | -2.46              | 0.39        | 1.06          | 1.17       | 0.81         | 5.53          | 5.17        | 12.36          | 1.36         | 30.82        | 32.37         | 10.84       | 34.14        |
| 80            | -32.68             | 0.59        | 1.65          | 1.46       | 1.43         | 10.30         | 7.72        | 18.16          | 1.53         | 44.61        | 46.50         | 18.24       | 49.95        |
| 84            | -21.62             | 0.35        | 1.12          | 1.05       | 0.84         | 7.76          | 5.26        | 12.13          | 0.66         | 30.91        | 32.36         | 12.11       | 34.55        |

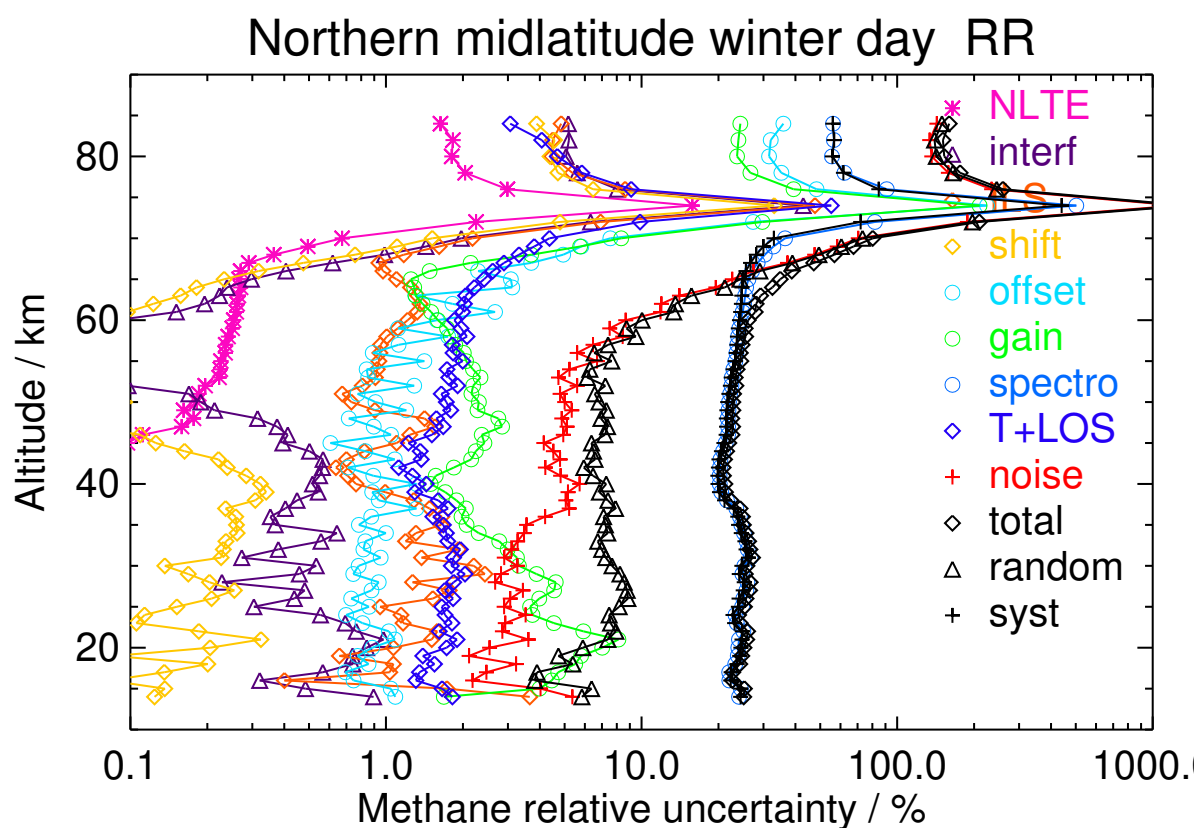

**Figure S77.** V8R\_CH4\_561 Northern midlatitude winter day

**Table S78.** Methane error budget for Northern midlatitude winter night. All uncertainties are  $1\sigma$ .

| altitude (km) | mean target (ppbv) | NLTE (ppbv) | interf (ppbv) | ILS (ppbv) | shift (ppbv) | offset (ppbv) | gain (ppbv) | spectro (ppbv) | T+LOS (ppbv) | noise (ppbv) | random (ppbv) | syst (ppbv) | total (ppbv) |
|---------------|--------------------|-------------|---------------|------------|--------------|---------------|-------------|----------------|--------------|--------------|---------------|-------------|--------------|
| 30            | 983.44             | 0.04        | 3.32          | 22.59      | 3.04         | 8.94          | 54.37       | 244.11         | 20.49        | 28.43        | 76.36         | 241.98      | 253.74       |
| 35            | 566.49             | 0.04        | 2.33          | 5.52       | 1.64         | 5.35          | 12.33       | 136.87         | 9.78         | 21.79        | 43.41         | 132.81      | 139.72       |
| 40            | 384.38             | 0.11        | 2.21          | 3.16       | 1.22         | 3.79          | 9.93        | 86.83          | 5.55         | 19.13        | 26.36         | 85.86       | 89.81        |
| 45            | 332.55             | 0.19        | 1.28          | 4.22       | 0.49         | 2.44          | 11.33       | 79.19          | 4.78         | 12.84        | 24.57         | 77.52       | 81.32        |
| 50            | 200.17             | 0.18        | 0.33          | 2.21       | 0.20         | 2.06          | 5.07        | 46.42          | 3.56         | 9.63         | 15.32         | 45.39       | 47.91        |
| 55            | 160.35             | 0.21        | 0.11          | 1.64       | 0.11         | 1.59          | 3.55        | 37.46          | 3.14         | 9.42         | 11.59         | 37.23       | 38.99        |
| 60            | 128.69             | 0.19        | 0.10          | 1.52       | 0.13         | 1.80          | 2.15        | 31.83          | 2.91         | 11.72        | 13.72         | 31.32       | 34.19        |
| 65            | 71.41              | 0.14        | 0.21          | 0.93       | 0.24         | 1.85          | 0.91        | 19.22          | 1.95         | 15.82        | 17.06         | 18.38       | 25.08        |
| 70            | 31.03              | 0.11        | 0.29          | 0.55       | 0.45         | 2.47          | 2.00        | 12.55          | 1.48         | 20.47        | 21.69         | 10.90       | 24.27        |
| 74            | 8.77               | 0.18        | 0.63          | 1.06       | 0.81         | 5.94          | 4.35        | 13.11          | 1.56         | 31.46        | 33.14         | 11.06       | 34.94        |
| 80            | -17.43             | 0.40        | 1.36          | 2.06       | 1.65         | 10.50         | 9.27        | 22.29          | 1.91         | 44.78        | 47.87         | 20.49       | 52.07        |
| 84            | -17.28             | 0.26        | 0.90          | 1.30       | 1.11         | 7.51          | 5.84        | 14.50          | 0.78         | 29.83        | 31.94         | 13.22       | 34.57        |

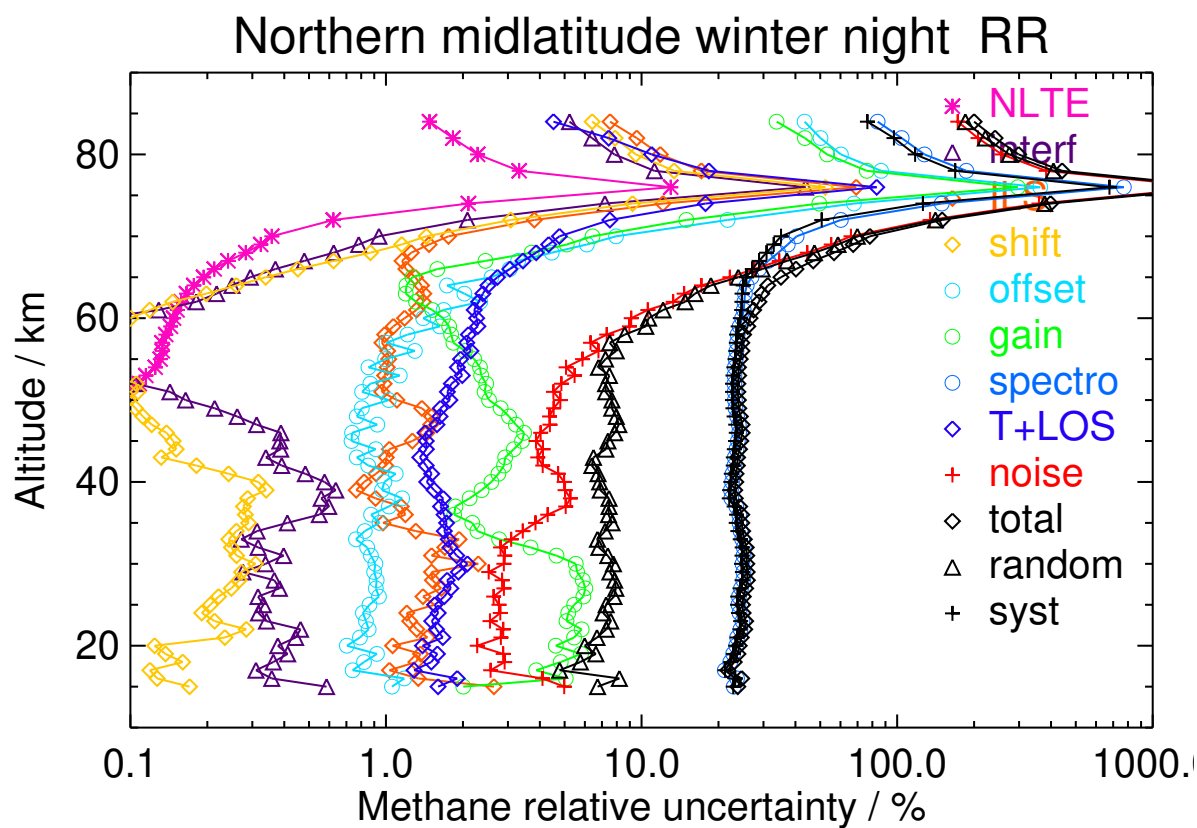

**Figure S78.** V8R\_CH4\_561 Northern midlatitude winter night

**Table S79.** Methane error budget for Northern midlatitude spring day. All uncertainties are  $1\sigma$ .

| altitude (km) | mean target (ppbv) | NLTE (ppbv) | interf (ppbv) | ILS (ppbv) | shift (ppbv) | offset (ppbv) | gain (ppbv) | spectro (ppbv) | T+LOS (ppbv) | noise (ppbv) | random (ppbv) | syst (ppbv) | total (ppbv) |
|---------------|--------------------|-------------|---------------|------------|--------------|---------------|-------------|----------------|--------------|--------------|---------------|-------------|--------------|
| 30            | 966.44             | 0.05        | 2.04          | 9.25       | 2.73         | 7.41          | 21.26       | 251.21         | 17.22        | 25.77        | 52.63         | 248.80      | 254.31       |
| 35            | 570.87             | 0.12        | 2.33          | 3.16       | 1.92         | 4.52          | 11.13       | 139.14         | 10.21        | 22.40        | 46.05         | 134.20      | 141.88       |
| 40            | 404.74             | 0.17        | 1.80          | 4.86       | 1.43         | 3.07          | 7.66        | 85.97          | 5.24         | 14.13        | 32.17         | 81.73       | 87.83        |
| 45            | 302.81             | 0.27        | 1.29          | 1.87       | 0.55         | 2.49          | 7.55        | 69.11          | 3.64         | 11.27        | 26.51         | 65.44       | 70.61        |
| 50            | 246.95             | 0.39        | 0.56          | 2.63       | 0.24         | 1.52          | 6.50        | 55.82          | 3.42         | 8.55         | 17.37         | 54.32       | 57.03        |
| 55            | 190.46             | 0.36        | 0.10          | 2.20       | 0.17         | 1.43          | 4.04        | 43.96          | 3.39         | 7.38         | 12.26         | 43.26       | 44.96        |
| 60            | 139.11             | 0.29        | 0.11          | 1.59       | 0.12         | 2.73          | 2.16        | 33.76          | 2.76         | 11.36        | 13.40         | 33.34       | 35.93        |
| 65            | 79.31              | 0.14        | 0.16          | 0.62       | 0.12         | 1.00          | 0.90        | 20.40          | 1.65         | 12.28        | 13.47         | 19.76       | 23.91        |
| 70            | 34.63              | 0.18        | 0.33          | 1.07       | 0.29         | 2.01          | 2.06        | 11.68          | 1.21         | 18.47        | 19.37         | 10.65       | 22.11        |
| 74            | -8.84              | 0.74        | 1.46          | 4.12       | 1.59         | 4.93          | 10.11       | 22.09          | 2.14         | 29.34        | 31.92         | 21.98       | 38.76        |
| 80            | -40.79             | 1.61        | 3.25          | 7.94       | 4.58         | 9.31          | 22.58       | 47.51          | 3.47         | 42.82        | 47.52         | 50.38       | 69.26        |
| 84            | -27.42             | 0.97        | 1.99          | 4.61       | 2.85         | 6.65          | 13.62       | 29.14          | 1.41         | 28.75        | 31.32         | 30.99       | 44.06        |

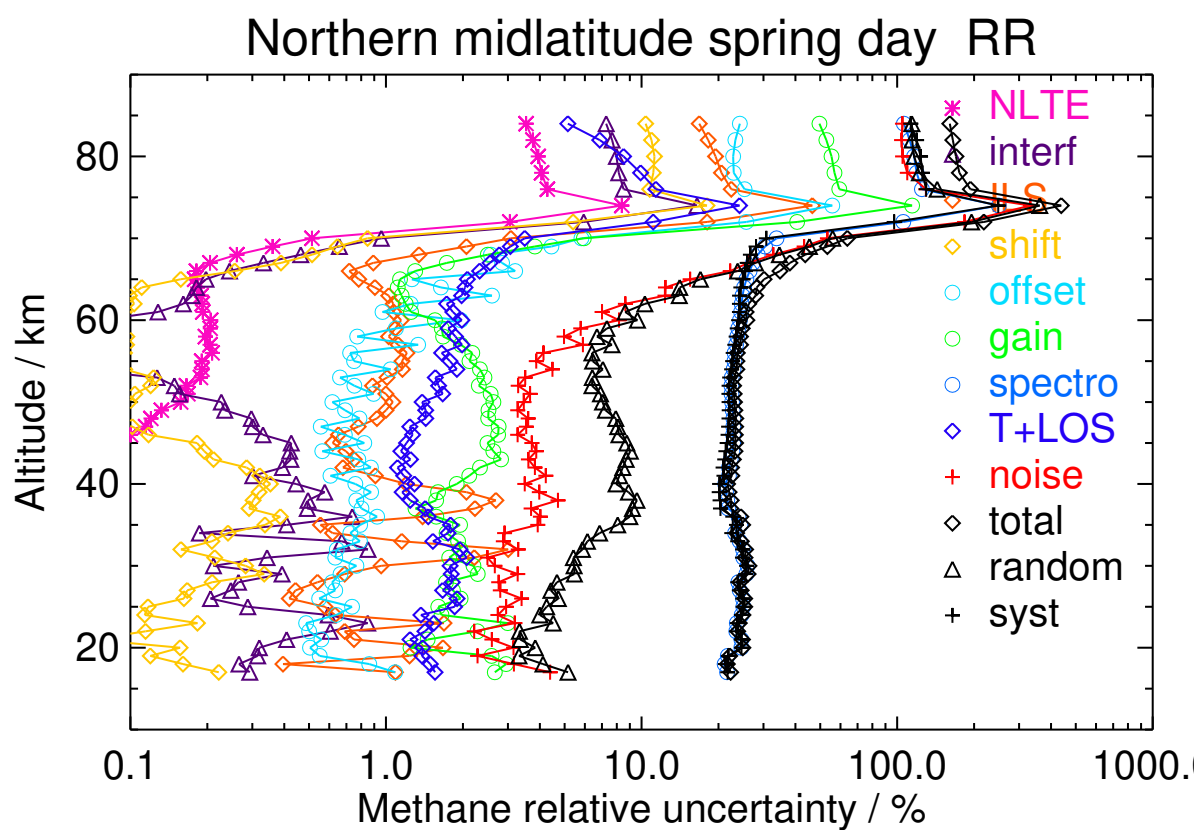

**Figure S79.** V8R\_CH4\_561 Northern midlatitude spring day

**Table S80.** Methane error budget for Northern midlatitude spring night. All uncertainties are  $1\sigma$ .

| altitude (km) | mean target (ppbv) | NLTE (ppbv) | interf (ppbv) | ILS (ppbv) | shift (ppbv) | offset (ppbv) | gain (ppbv) | spectro (ppbv) | T+LOS (ppbv) | noise (ppbv) | random (ppbv) | syst (ppbv) | total (ppbv) |
|---------------|--------------------|-------------|---------------|------------|--------------|---------------|-------------|----------------|--------------|--------------|---------------|-------------|--------------|
| 30            | 965.86             | 0.01        | 2.16          | 8.07       | 2.59         | 6.42          | 14.33       | 243.37         | 16.72        | 26.42        | 47.17         | 241.46      | 246.03       |
| 35            | 537.85             | 0.04        | 1.64          | 3.34       | 1.60         | 4.27          | 8.64        | 131.71         | 10.38        | 22.31        | 42.55         | 127.48      | 134.40       |
| 40            | 378.14             | 0.07        | 2.30          | 3.55       | 1.60         | 3.39          | 7.92        | 82.27          | 5.35         | 14.73        | 30.45         | 78.62       | 84.31        |
| 45            | 226.41             | 0.09        | 1.31          | 2.25       | 0.50         | 1.94          | 5.99        | 54.19          | 2.69         | 10.06        | 25.75         | 49.27       | 55.60        |
| 50            | 201.99             | 0.16        | 0.48          | 2.41       | 0.16         | 1.45          | 5.21        | 47.06          | 2.78         | 8.33         | 19.70         | 44.04       | 48.24        |
| 55            | 161.73             | 0.18        | 0.08          | 1.93       | 0.14         | 1.56          | 3.38        | 38.53          | 2.99         | 7.62         | 14.51         | 36.87       | 39.62        |
| 60            | 121.02             | 0.17        | 0.12          | 1.69       | 0.09         | 2.65          | 1.99        | 29.83          | 2.33         | 11.02        | 14.16         | 28.81       | 32.11        |
| 65            | 64.13              | 0.11        | 0.14          | 0.84       | 0.12         | 0.91          | 1.04        | 16.62          | 1.48         | 12.12        | 13.28         | 15.86       | 20.68        |
| 70            | 29.83              | 0.13        | 0.36          | 1.10       | 0.40         | 2.14          | 2.07        | 11.57          | 1.20         | 18.92        | 19.76         | 10.62       | 22.44        |
| 74            | 3.66               | 0.41        | 1.31          | 3.46       | 1.86         | 5.06          | 7.92        | 20.95          | 2.20         | 30.35        | 32.30         | 20.66       | 38.35        |
| 80            | -17.90             | 0.78        | 2.48          | 5.99       | 4.31         | 9.02          | 14.64       | 36.79          | 2.75         | 43.56        | 46.81         | 37.75       | 60.13        |
| 84            | -20.34             | 0.48        | 1.59          | 3.54       | 2.84         | 6.42          | 9.32        | 23.74          | 1.16         | 28.66        | 30.72         | 24.37       | 39.21        |

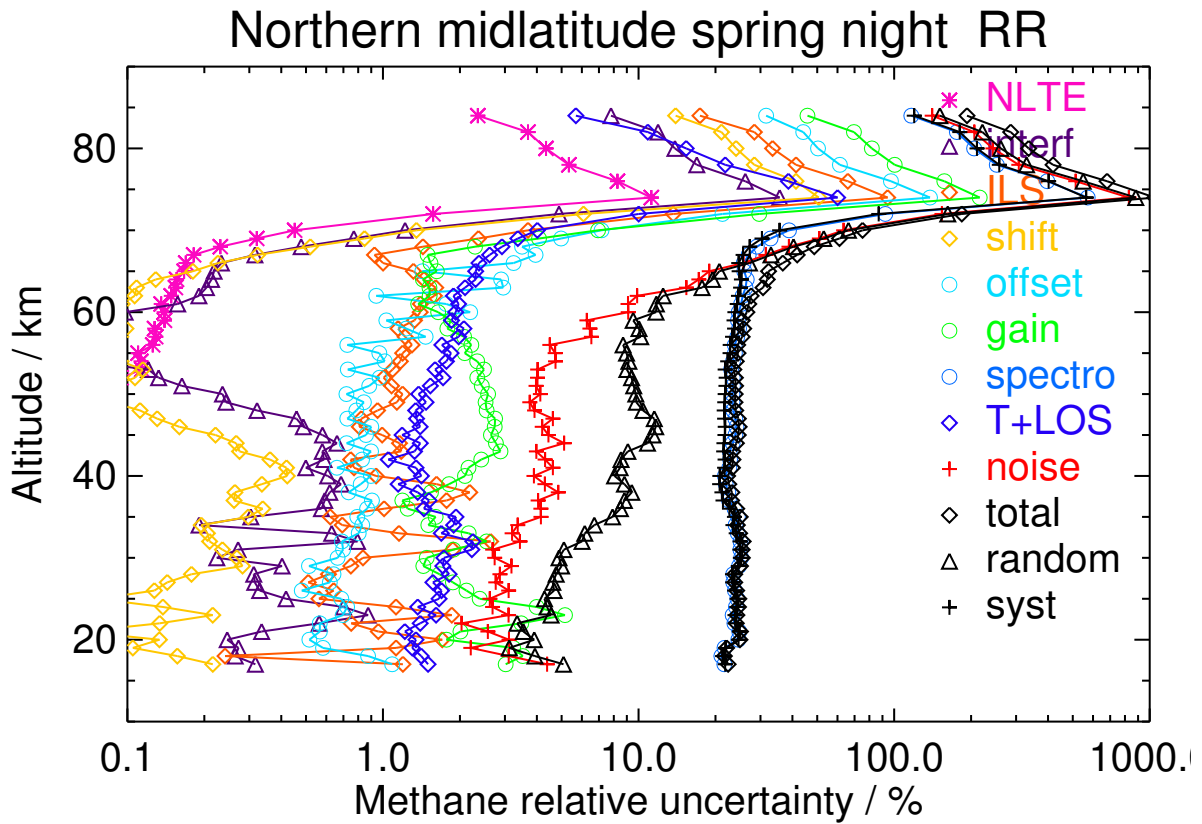

**Figure S80.** V8R\_CH4\_561 Northern midlatitude spring night

**Table S81.** Methane error budget for Northern midlatitude summer day. All uncertainties are  $1\sigma$ .

| altitude (km) | mean target (ppbv) | NLTE (ppbv) | interf (ppbv) | ILS (ppbv) | shift (ppbv) | offset (ppbv) | gain (ppbv) | spectro (ppbv) | T+LOS (ppbv) | noise (ppbv) | random (ppbv) | syst (ppbv) | total (ppbv) |
|---------------|--------------------|-------------|---------------|------------|--------------|---------------|-------------|----------------|--------------|--------------|---------------|-------------|--------------|
| 30            | 900.31             | 0.02        | 2.63          | 6.24       | 2.24         | 7.32          | 29.27       | 230.45         | 14.40        | 25.42        | 37.49         | 231.33      | 234.35       |
| 35            | 544.93             | 0.06        | 3.28          | 4.39       | 2.01         | 5.00          | 11.58       | 131.90         | 10.42        | 23.94        | 32.12         | 131.31      | 135.18       |
| 40            | 269.12             | 0.09        | 1.33          | 1.86       | 0.79         | 2.50          | 4.86        | 54.64          | 3.72         | 11.28        | 16.47         | 53.77       | 56.24        |
| 45            | 166.33             | 0.09        | 0.94          | 1.42       | 0.35         | 1.75          | 3.31        | 38.26          | 1.63         | 9.30         | 16.57         | 35.99       | 39.62        |
| 50            | 109.64             | 0.12        | 0.60          | 1.50       | 0.16         | 1.20          | 2.40        | 27.59          | 1.64         | 8.30         | 15.70         | 24.42       | 29.03        |
| 55            | 169.99             | 0.27        | 0.37          | 1.17       | 0.28         | 1.37          | 3.25        | 42.95          | 2.68         | 6.44         | 21.10         | 38.24       | 43.67        |
| 60            | 201.14             | 0.39        | 0.25          | 1.78       | 0.30         | 2.84          | 3.53        | 50.13          | 3.60         | 11.09        | 22.86         | 46.38       | 51.70        |
| 65            | 145.60             | 0.24        | 0.26          | 0.65       | 0.24         | 1.62          | 1.61        | 36.87          | 2.55         | 12.08        | 16.45         | 35.31       | 38.96        |
| 70            | 128.24             | 0.59        | 0.59          | 1.96       | 0.53         | 2.60          | 1.67        | 32.54          | 2.34         | 19.11        | 21.78         | 31.13       | 38.00        |
| 74            | 90.20              | 1.59        | 1.42          | 2.20       | 1.77         | 4.17          | 6.59        | 31.34          | 1.73         | 28.74        | 31.20         | 30.19       | 43.41        |
| 80            | 60.71              | 2.47        | 2.34          | 2.92       | 4.41         | 8.20          | 11.75       | 36.13          | 0.30         | 42.60        | 45.94         | 35.42       | 58.01        |
| 84            | 25.68              | 1.44        | 1.52          | 1.81       | 3.16         | 6.09          | 7.51        | 22.82          | 0.09         | 28.95        | 31.07         | 22.46       | 38.34        |

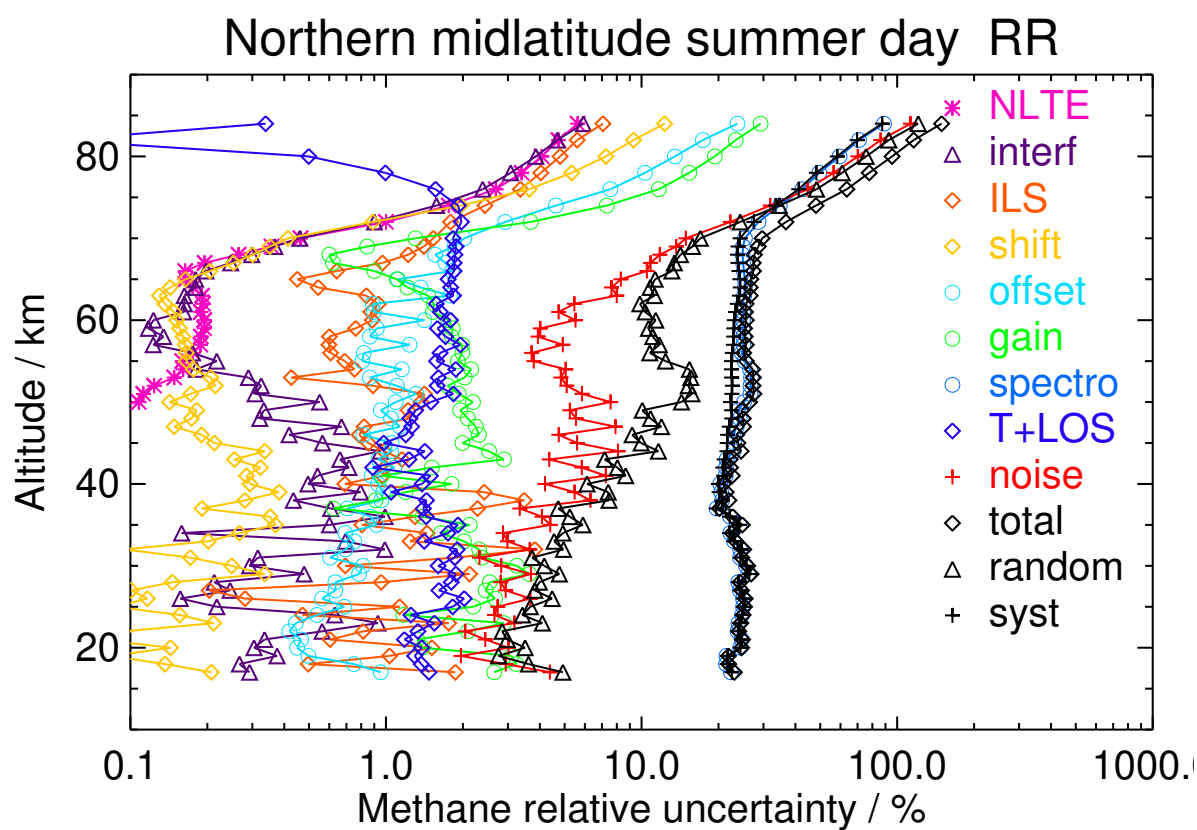

**Figure S81.** V8R\_CH4\_561 Northern midlatitude summer day

**Table S82.** Methane error budget for Northern midlatitude summer night. All uncertainties are  $1\sigma$ .

| altitude (km) | mean target (ppbv) | NLTE (ppbv) | interf (ppbv) | ILS (ppbv) | shift (ppbv) | offset (ppbv) | gain (ppbv) | spectro (ppbv) | T+LOS (ppbv) | noise (ppbv) | random (ppbv) | syst (ppbv) | total (ppbv) |
|---------------|--------------------|-------------|---------------|------------|--------------|---------------|-------------|----------------|--------------|--------------|---------------|-------------|--------------|
| 30            | 936.52             | 0.03        | 4.35          | 8.89       | 2.15         | 6.50          | 19.79       | 247.89         | 14.21        | 26.06        | 36.98         | 247.99      | 250.74       |
| 35            | 563.29             | 0.02        | 2.65          | 4.29       | 2.06         | 4.49          | 5.60        | 134.44         | 10.24        | 23.28        | 30.30         | 133.73      | 137.12       |
| 40            | 269.32             | 0.04        | 1.76          | 1.80       | 0.92         | 2.60          | 4.96        | 55.27          | 3.77         | 11.57        | 15.98         | 54.65       | 56.94        |
| 45            | 164.60             | 0.05        | 0.95          | 1.82       | 0.45         | 1.74          | 3.95        | 37.62          | 1.60         | 9.94         | 15.34         | 36.12       | 39.24        |
| 50            | 111.29             | 0.06        | 0.55          | 1.18       | 0.19         | 1.12          | 1.93        | 27.17          | 1.59         | 7.53         | 14.91         | 24.11       | 28.35        |
| 55            | 184.87             | 0.17        | 0.40          | 1.24       | 0.31         | 1.66          | 3.62        | 45.49          | 3.30         | 7.14         | 22.21         | 40.69       | 46.36        |
| 60            | 194.23             | 0.18        | 0.22          | 2.19       | 0.31         | 2.65          | 3.45        | 48.39          | 3.59         | 10.33        | 20.82         | 45.30       | 49.85        |
| 65            | 135.45             | 0.10        | 0.18          | 0.72       | 0.20         | 1.54          | 1.78        | 34.39          | 2.81         | 12.18        | 15.67         | 33.16       | 36.67        |
| 70            | 100.52             | 0.72        | 0.68          | 2.35       | 0.53         | 2.30          | 2.79        | 30.22          | 2.61         | 20.05        | 21.82         | 29.43       | 36.63        |
| 74            | 63.92              | 1.33        | 2.32          | 3.18       | 3.62         | 4.28          | 10.69       | 40.40          | 2.32         | 28.54        | 31.65         | 40.17       | 51.14        |
| 80            | 26.67              | 1.50        | 2.81          | 3.11       | 6.17         | 8.11          | 11.03       | 40.00          | 0.51         | 43.08        | 46.01         | 39.81       | 60.84        |
| 84            | 6.63               | 0.76        | 1.67          | 2.32       | 4.00         | 5.92          | 6.06        | 22.88          | 0.02         | 28.86        | 30.45         | 22.92       | 38.11        |

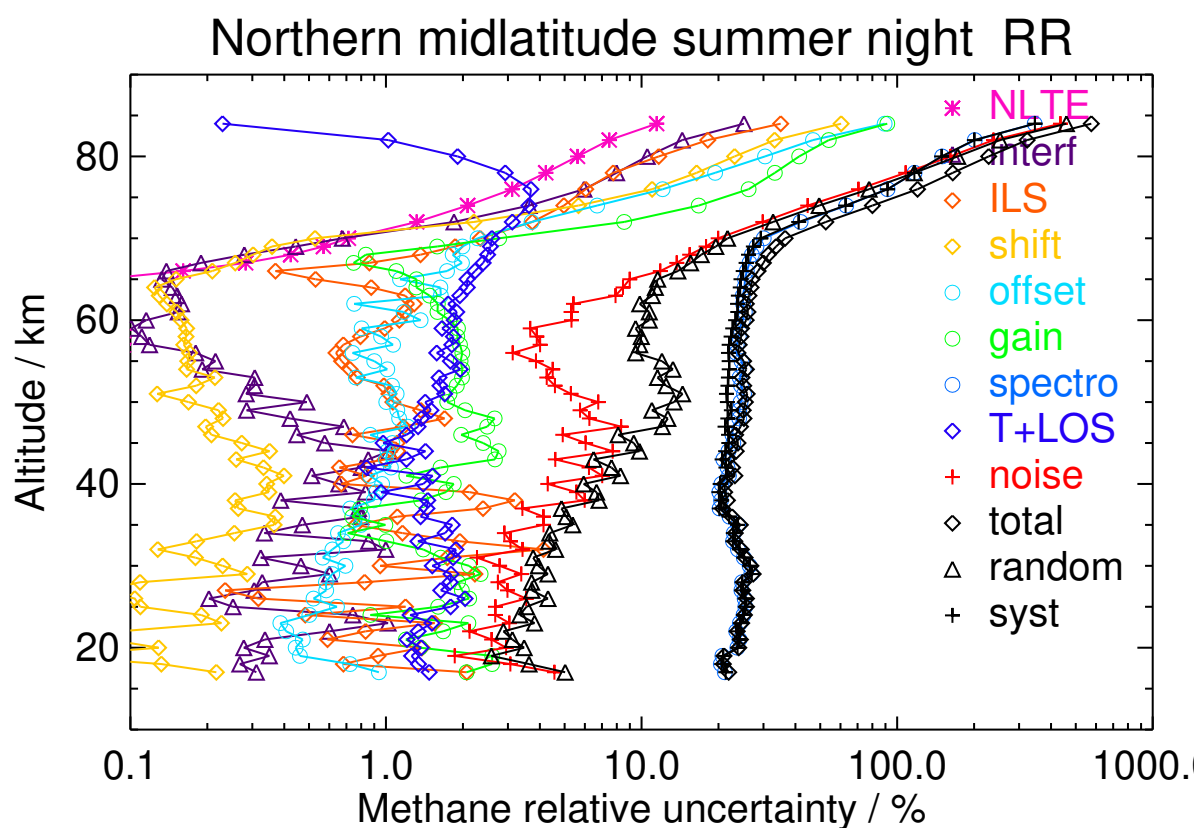

**Figure S82.** V8R\_CH4\_561 Northern midlatitude summer night



**Table S83.** Methane error budget for Northern midlatitude autumn day. All uncertainties are  $1\sigma$ .

| altitude (km) | mean target (ppbv) | NLTE (ppbv) | interf (ppbv) | ILS (ppbv) | shift (ppbv) | offset (ppbv) | gain (ppbv) | spectro (ppbv) | T+LOS (ppbv) | noise (ppbv) | random (ppbv) | syst (ppbv) | total (ppbv) |
|---------------|--------------------|-------------|---------------|------------|--------------|---------------|-------------|----------------|--------------|--------------|---------------|-------------|--------------|
| 30            | 885.32             | 0.03        | 1.96          | 7.71       | 2.49         | 6.94          | 22.26       | 229.20         | 16.10        | 26.84        | 63.79         | 223.73      | 232.65       |
| 35            | 666.90             | 0.12        | 2.98          | 4.99       | 1.31         | 4.23          | 11.27       | 168.26         | 10.38        | 21.68        | 65.15         | 157.56      | 170.50       |
| 40            | 523.27             | 0.23        | 2.13          | 8.09       | 1.68         | 4.33          | 8.22        | 117.61         | 7.04         | 19.82        | 58.16         | 105.13      | 120.14       |
| 45            | 358.82             | 0.31        | 1.39          | 1.81       | 0.75         | 2.66          | 8.74        | 79.78          | 4.60         | 13.72        | 33.76         | 74.33       | 81.63        |
| 50            | 304.86             | 0.47        | 0.70          | 1.79       | 0.17         | 1.86          | 6.93        | 66.97          | 4.64         | 10.16        | 20.51         | 65.15       | 68.30        |
| 55            | 281.93             | 0.62        | 0.21          | 2.25       | 0.25         | 2.38          | 6.13        | 62.87          | 5.78         | 11.75        | 16.12         | 62.55       | 64.60        |
| 60            | 246.90             | 0.60        | 0.19          | 2.69       | 0.20         | 3.26          | 4.29        | 57.83          | 5.20         | 14.09        | 16.66         | 57.69       | 60.05        |
| 65            | 163.07             | 0.34        | 0.23          | 1.18       | 0.19         | 1.52          | 1.71        | 40.03          | 3.62         | 14.36        | 16.26         | 39.55       | 42.76        |
| 70            | 89.62              | 0.42        | 0.35          | 0.85       | 0.38         | 2.69          | 2.14        | 25.40          | 2.63         | 19.72        | 21.56         | 24.27       | 32.47        |
| 74            | 51.23              | 1.23        | 1.15          | 2.33       | 1.53         | 5.55          | 8.68        | 24.76          | 3.58         | 31.90        | 34.32         | 24.13       | 41.96        |
| 80            | 13.86              | 1.95        | 2.12          | 4.77       | 2.98         | 9.92          | 16.11       | 32.73          | 4.06         | 43.75        | 47.47         | 33.86       | 58.31        |
| 84            | 1.79               | 1.04        | 1.11          | 2.24       | 1.58         | 7.17          | 8.77        | 19.00          | 1.66         | 29.11        | 31.06         | 19.62       | 36.74        |

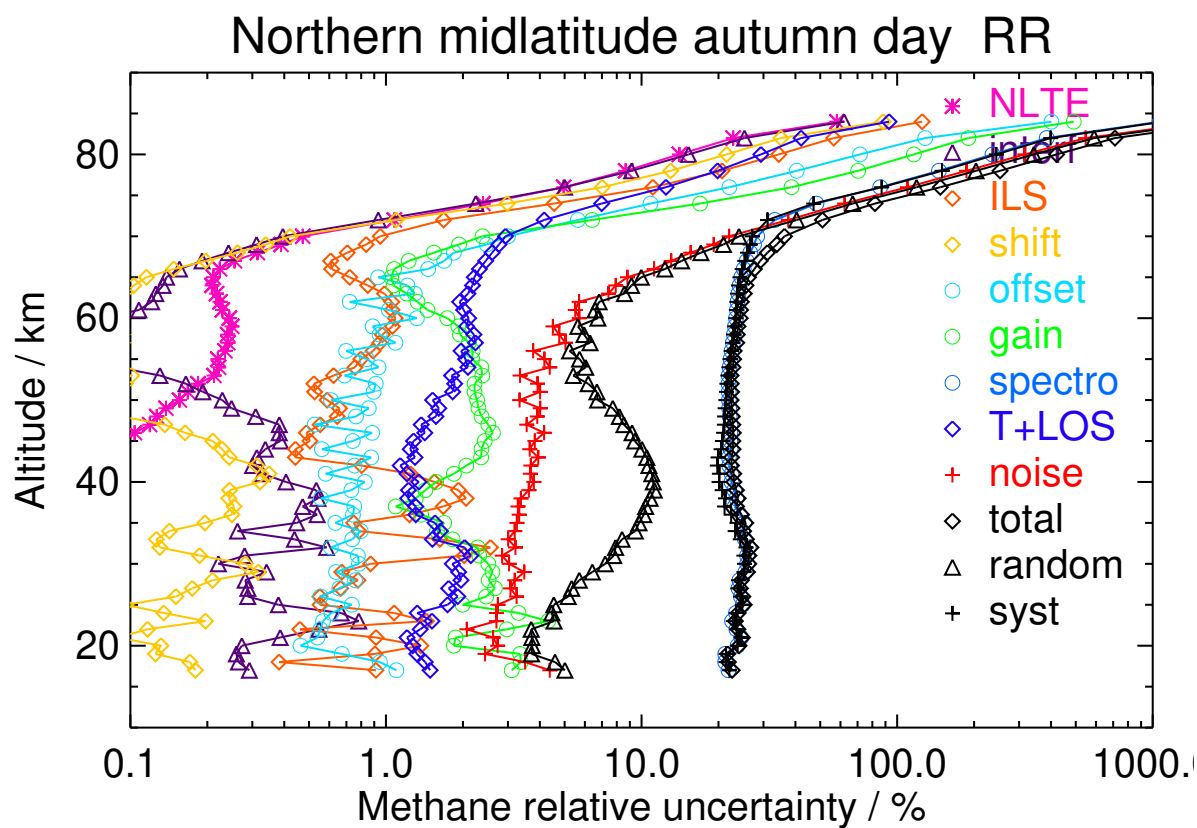

**Figure S83.** V8R\_CH4\_561 Northern midlatitude autumn day

**Table S84.** Methane error budget for Northern midlatitude autumn night. All uncertainties are  $1\sigma$ .

| altitude (km) | mean target (ppbv) | NLTE (ppbv) | interf (ppbv) | ILS (ppbv) | shift (ppbv) | offset (ppbv) | gain (ppbv) | spectro (ppbv) | T+LOS (ppbv) | noise (ppbv) | random (ppbv) | syst (ppbv) | total (ppbv) |
|---------------|--------------------|-------------|---------------|------------|--------------|---------------|-------------|----------------|--------------|--------------|---------------|-------------|--------------|
| 30            | 944.65             | 0.03        | 1.91          | 9.03       | 2.41         | 6.60          | 20.02       | 236.72         | 15.98        | 26.28        | 54.09         | 233.65      | 239.83       |
| 35            | 765.93             | 0.05        | 2.45          | 4.98       | 1.61         | 4.67          | 14.32       | 187.95         | 12.13        | 22.03        | 57.19         | 181.52      | 190.31       |
| 40            | 533.99             | 0.12        | 1.80          | 4.86       | 1.53         | 4.71          | 8.78        | 122.11         | 7.89         | 21.29        | 51.79         | 113.46      | 124.72       |
| 45            | 360.48             | 0.17        | 1.18          | 3.45       | 0.46         | 2.73          | 11.44       | 84.68          | 5.16         | 14.35        | 33.26         | 80.31       | 86.92        |
| 50            | 316.43             | 0.26        | 0.63          | 2.52       | 0.25         | 2.24          | 7.98        | 70.81          | 5.36         | 11.39        | 20.26         | 69.55       | 72.44        |
| 55            | 287.66             | 0.37        | 0.21          | 2.66       | 0.23         | 2.65          | 6.57        | 63.92          | 6.57         | 13.33        | 16.85         | 63.87       | 66.06        |
| 60            | 248.55             | 0.38        | 0.19          | 3.21       | 0.18         | 3.19          | 4.50        | 57.68          | 5.67         | 14.48        | 16.71         | 57.70       | 60.08        |
| 65            | 164.11             | 0.27        | 0.25          | 1.87       | 0.21         | 1.89          | 1.89        | 40.21          | 4.14         | 15.64        | 17.81         | 39.65       | 43.47        |
| 70            | 92.73              | 0.43        | 0.53          | 1.16       | 0.54         | 3.07          | 3.64        | 27.39          | 3.39         | 21.51        | 24.21         | 25.75       | 35.34        |
| 74            | 39.40              | 0.72        | 1.09          | 2.52       | 1.21         | 6.35          | 8.30        | 25.72          | 3.81         | 33.65        | 36.42         | 24.50       | 43.89        |
| 80            | -6.42              | 1.00        | 1.82          | 4.94       | 2.48         | 10.28         | 14.61       | 32.18          | 3.91         | 43.99        | 48.79         | 30.98       | 57.80        |
| 84            | -6.35              | 0.43        | 0.81          | 1.80       | 1.08         | 7.40          | 6.27        | 15.14          | 1.28         | 28.99        | 31.00         | 14.48       | 34.22        |

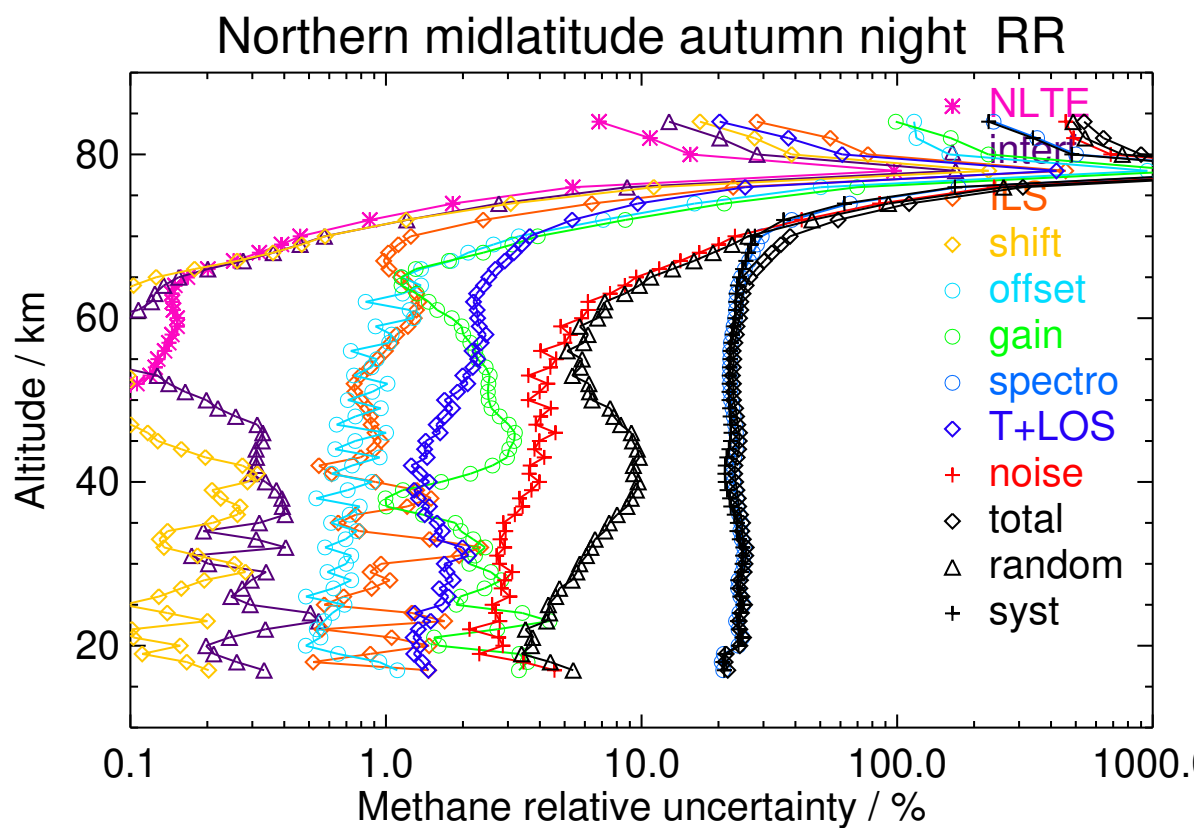

**Figure S84.** V8R\_CH4\_561 Northern midlatitude autumn night

**Table S85.** Methane error budget for Tropics day. All uncertainties are  $1\sigma$ .

| altitude (km) | mean target (ppbv) | NLTE (ppbv) | interf (ppbv) | ILS (ppbv) | shift (ppbv) | offset (ppbv) | gain (ppbv) | spectro (ppbv) | T+LOS (ppbv) | noise (ppbv) | random (ppbv) | syst (ppbv) | total (ppbv) |
|---------------|--------------------|-------------|---------------|------------|--------------|---------------|-------------|----------------|--------------|--------------|---------------|-------------|--------------|
| 30            | 1466.92            | 0.04        | 3.83          | 14.97      | 2.30         | 6.58          | 7.43        | 365.78         | 21.57        | 28.84        | 43.91         | 365.38      | 368.01       |
| 35            | 1244.21            | 0.19        | 4.33          | 4.83       | 2.78         | 4.94          | 9.53        | 289.24         | 16.02        | 24.55        | 40.05         | 288.24      | 291.01       |
| 40            | 705.89             | 0.28        | 2.88          | 10.22      | 1.68         | 3.70          | 14.01       | 142.00         | 8.69         | 18.22        | 34.44         | 140.39      | 144.56       |
| 45            | 424.46             | 0.31        | 1.67          | 2.51       | 1.00         | 2.88          | 9.92        | 88.31          | 4.81         | 12.62        | 21.33         | 87.43       | 89.99        |
| 50            | 297.52             | 0.38        | 0.65          | 2.94       | 0.32         | 1.53          | 7.27        | 65.01          | 3.97         | 8.96         | 15.57         | 64.37       | 66.23        |
| 55            | 201.81             | 0.32        | 0.14          | 2.00       | 0.24         | 1.26          | 3.97        | 45.65          | 3.42         | 7.32         | 10.73         | 45.34       | 46.59        |
| 60            | 157.37             | 0.26        | 0.12          | 1.28       | 0.17         | 2.57          | 2.20        | 37.53          | 3.10         | 11.49        | 12.96         | 37.35       | 39.54        |
| 65            | 129.90             | 0.18        | 0.21          | 0.56       | 0.18         | 1.63          | 0.97        | 31.77          | 2.62         | 13.69        | 14.55         | 31.56       | 34.76        |
| 70            | 96.40              | 0.52        | 0.30          | 0.91       | 0.37         | 2.35          | 1.38        | 24.73          | 2.70         | 19.04        | 19.98         | 24.31       | 31.47        |
| 74            | 52.16              | 1.31        | 1.07          | 1.09       | 1.63         | 4.74          | 8.22        | 27.09          | 3.23         | 30.03        | 31.91         | 26.92       | 41.74        |
| 80            | 6.19               | 1.74        | 1.82          | 1.63       | 2.99         | 9.76          | 14.16       | 36.89          | 2.46         | 44.12        | 46.87         | 37.82       | 60.23        |
| 84            | -4.15              | 0.98        | 1.08          | 1.02       | 1.69         | 7.46          | 7.97        | 21.62          | 0.84         | 30.50        | 32.08         | 22.24       | 39.03        |

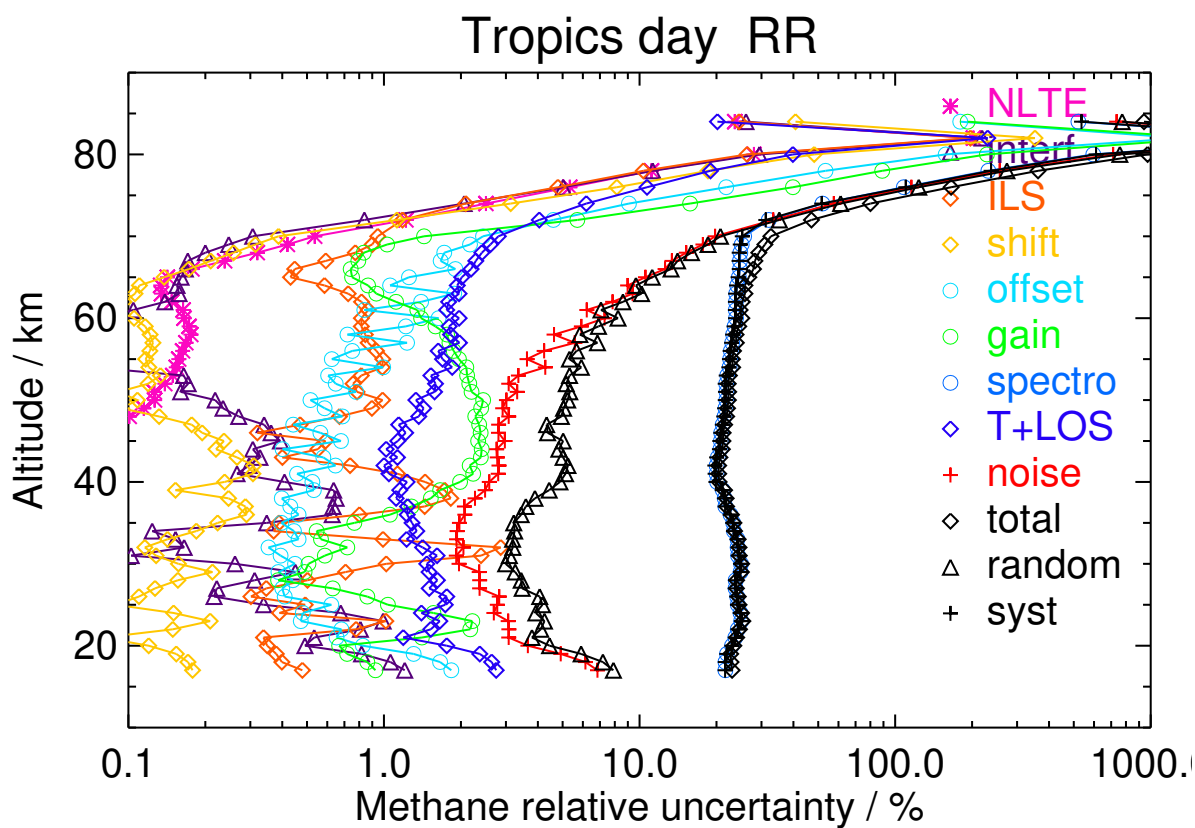

**Figure S85.** V8R\_CH4\_561 Tropics day

**Table S86.** Methane error budget for Tropics night. All uncertainties are  $1\sigma$ .

| altitude (km) | mean target (ppbv) | NLTE (ppbv) | interf (ppbv) | ILS (ppbv) | shift (ppbv) | offset (ppbv) | gain (ppbv) | spectro (ppbv) | T+LOS (ppbv) | noise (ppbv) | random (ppbv) | syst (ppbv) | total (ppbv) |
|---------------|--------------------|-------------|---------------|------------|--------------|---------------|-------------|----------------|--------------|--------------|---------------|-------------|--------------|
| 30            | 1462.32            | 0.01        | 4.62          | 17.20      | 2.86         | 6.17          | 7.99        | 365.58         | 20.60        | 28.99        | 47.24         | 364.84      | 367.89       |
| 35            | 1239.02            | 0.06        | 4.33          | 7.69       | 2.76         | 5.07          | 9.60        | 290.46         | 16.48        | 24.56        | 41.53         | 289.35      | 292.31       |
| 40            | 730.65             | 0.09        | 3.48          | 10.90      | 1.68         | 4.16          | 12.59       | 147.25         | 9.15         | 19.22        | 37.88         | 144.95      | 149.81       |
| 45            | 429.40             | 0.13        | 1.59          | 2.28       | 1.06         | 2.48          | 9.85        | 90.29          | 4.38         | 11.91        | 20.51         | 89.47       | 91.79        |
| 50            | 288.71             | 0.18        | 0.69          | 2.84       | 0.33         | 1.58          | 6.78        | 62.88          | 4.09         | 9.19         | 17.07         | 61.81       | 64.13        |
| 55            | 206.91             | 0.15        | 0.16          | 2.17       | 0.26         | 1.62          | 3.95        | 46.75          | 3.85         | 8.24         | 12.15         | 46.30       | 47.87        |
| 60            | 171.44             | 0.11        | 0.17          | 1.70       | 0.18         | 2.91          | 2.55        | 40.26          | 3.44         | 12.18        | 14.15         | 39.98       | 42.42        |
| 65            | 142.06             | 0.25        | 0.19          | 0.64       | 0.16         | 1.65          | 1.30        | 34.52          | 3.15         | 13.96        | 15.49         | 34.08       | 37.44        |
| 70            | 106.29             | 0.93        | 0.75          | 1.88       | 1.02         | 2.44          | 5.18        | 31.28          | 3.55         | 21.22        | 22.95         | 30.89       | 38.48        |
| 74            | 55.84              | 1.37        | 1.66          | 2.58       | 2.84         | 5.46          | 12.10       | 36.85          | 3.95         | 31.68        | 34.45         | 37.23       | 50.73        |
| 80            | -0.97              | 1.18        | 1.70          | 2.74       | 2.69         | 10.40         | 11.34       | 32.40          | 2.33         | 44.84        | 47.45         | 32.72       | 57.64        |
| 84            | -7.63              | 0.63        | 0.90          | 1.55       | 1.21         | 8.13          | 5.49        | 16.68          | 0.80         | 31.15        | 32.79         | 16.59       | 36.74        |

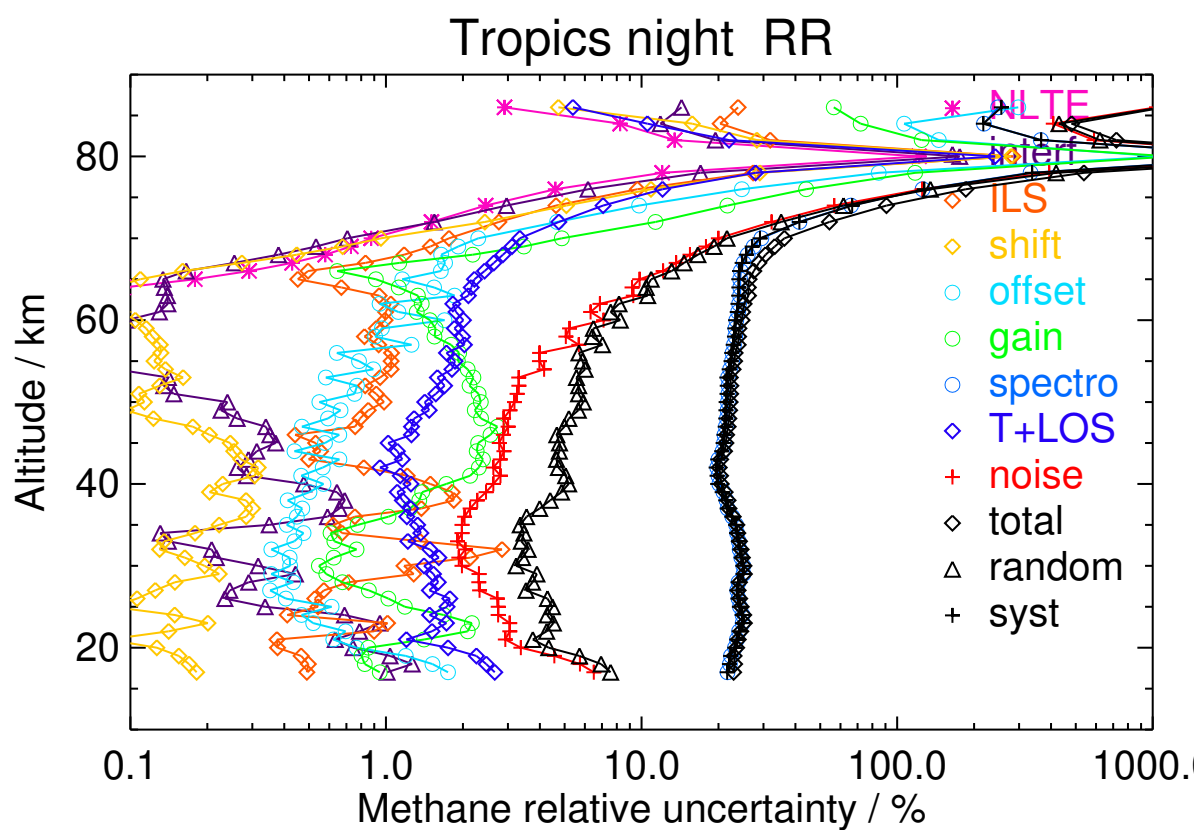

**Figure S86.** V8R\_CH4\_561 Tropics night

**Table S87.** Methane error budget for Southern midlatitude winter day. All uncertainties are  $1\sigma$ .

| altitude (km) | mean target (ppbv) | NLTE (ppbv) | interf (ppbv) | ILS (ppbv) | shift (ppbv) | offset (ppbv) | gain (ppbv) | spectro (ppbv) | T+LOS (ppbv) | noise (ppbv) | random (ppbv) | syst (ppbv) | total (ppbv) |
|---------------|--------------------|-------------|---------------|------------|--------------|---------------|-------------|----------------|--------------|--------------|---------------|-------------|--------------|
| 30            | 1193.31            | 0.05        | 6.51          | 23.75      | 2.74         | 7.71          | 45.93       | 297.48         | 23.38        | 33.50        | 96.88         | 289.07      | 304.87       |
| 35            | 756.96             | 0.07        | 2.90          | 8.60       | 2.39         | 5.81          | 20.77       | 192.07         | 15.08        | 22.70        | 68.18         | 183.13      | 195.41       |
| 40            | 251.73             | 0.07        | 2.51          | 3.76       | 1.29         | 3.62          | 3.54        | 58.21          | 4.63         | 16.65        | 29.13         | 53.72       | 61.11        |
| 45            | 242.13             | 0.20        | 1.22          | 1.93       | 0.38         | 1.67          | 5.81        | 52.85          | 3.36         | 11.04        | 17.50         | 51.59       | 54.48        |
| 50            | 248.99             | 0.39        | 0.44          | 2.35       | 0.22         | 2.02          | 6.31        | 56.49          | 3.81         | 9.43         | 18.32         | 54.86       | 57.83        |
| 55            | 215.08             | 0.48        | 0.15          | 1.96       | 0.25         | 2.42          | 4.97        | 49.52          | 4.55         | 11.83        | 16.46         | 48.75       | 51.46        |
| 60            | 173.20             | 0.45        | 0.12          | 1.92       | 0.16         | 1.90          | 3.00        | 41.86          | 3.53         | 11.06        | 14.37         | 41.19       | 43.63        |
| 65            | 142.32             | 0.36        | 0.21          | 0.99       | 0.29         | 2.49          | 1.38        | 35.41          | 3.45         | 15.96        | 18.74         | 34.34       | 39.12        |
| 70            | 107.08             | 0.74        | 0.61          | 1.31       | 0.95         | 3.11          | 3.02        | 30.83          | 3.59         | 21.86        | 25.19         | 28.79       | 38.25        |
| 74            | 73.80              | 1.36        | 1.33          | 2.95       | 1.95         | 6.47          | 7.26        | 29.21          | 3.60         | 34.38        | 37.82         | 26.98       | 46.46        |
| 80            | 19.29              | 1.49        | 1.71          | 3.24       | 2.67         | 10.06         | 9.68        | 24.97          | 2.47         | 44.39        | 47.51         | 23.66       | 53.08        |
| 84            | 2.95               | 0.94        | 0.97          | 2.12       | 1.18         | 7.61          | 4.84        | 12.90          | 0.91         | 29.79        | 31.62         | 12.00       | 33.82        |

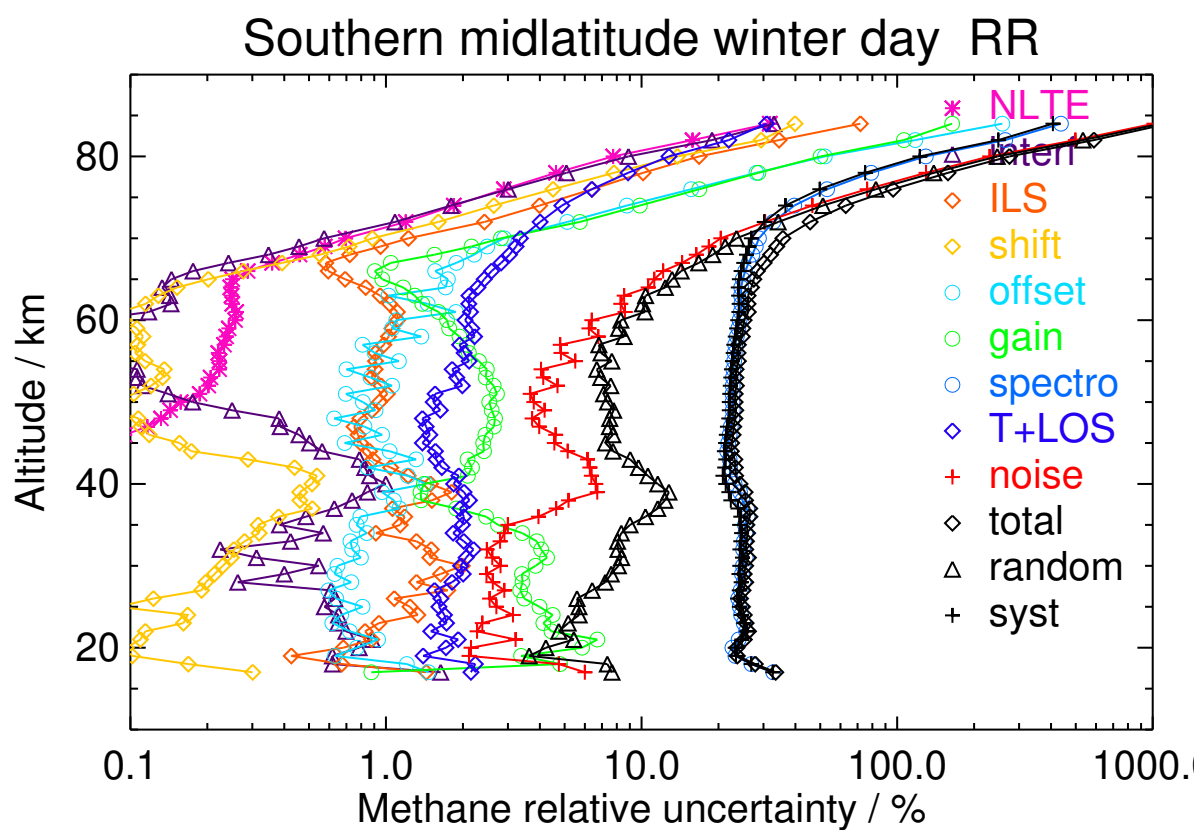

**Figure S87.** V8R\_CH4\_561 Southern midlatitude winter day

**Table S88.** Methane error budget for Southern midlatitude winter night. All uncertainties are  $1\sigma$ .

| altitude (km) | mean target (ppbv) | NLTE (ppbv) | interf (ppbv) | ILS (ppbv) | shift (ppbv) | offset (ppbv) | gain (ppbv) | spectro (ppbv) | T+LOS (ppbv) | noise (ppbv) | random (ppbv) | syst (ppbv) | total (ppbv) |
|---------------|--------------------|-------------|---------------|------------|--------------|---------------|-------------|----------------|--------------|--------------|---------------|-------------|--------------|
| 30            | 960.62             | 0.04        | 4.30          | 16.59      | 2.30         | 7.45          | 32.29       | 242.93         | 20.46        | 33.28        | 93.29         | 230.73      | 248.87       |
| 35            | 639.92             | 0.06        | 2.72          | 7.02       | 2.18         | 5.81          | 14.98       | 164.48         | 13.94        | 26.88        | 70.37         | 152.77      | 168.20       |
| 40            | 212.95             | 0.07        | 2.17          | 2.88       | 1.32         | 3.90          | 3.89        | 52.27          | 4.63         | 19.02        | 26.78         | 49.43       | 56.22        |
| 45            | 195.44             | 0.12        | 0.83          | 1.73       | 0.39         | 1.82          | 5.55        | 46.90          | 3.30         | 11.97        | 20.18         | 44.55       | 48.91        |
| 50            | 204.22             | 0.21        | 0.28          | 2.28       | 0.24         | 1.74          | 4.93        | 47.97          | 3.05         | 8.33         | 15.57         | 46.58       | 49.12        |
| 55            | 182.05             | 0.30        | 0.10          | 1.88       | 0.18         | 2.15          | 3.91        | 43.23          | 3.69         | 10.76        | 14.75         | 42.48       | 44.97        |
| 60            | 157.06             | 0.36        | 0.12          | 1.98       | 0.16         | 1.92          | 2.64        | 38.57          | 3.04         | 11.03        | 14.03         | 37.90       | 40.41        |
| 65            | 126.84             | 0.41        | 0.23          | 1.16       | 0.38         | 2.29          | 1.57        | 32.29          | 3.04         | 16.02        | 18.75         | 31.09       | 36.30        |
| 70            | 94.25              | 0.51        | 0.49          | 0.88       | 0.94         | 3.24          | 2.87        | 27.27          | 3.08         | 22.26        | 25.31         | 25.08       | 35.63        |
| 74            | 61.89              | 0.68        | 1.07          | 1.99       | 1.92         | 6.69          | 6.86        | 24.60          | 3.21         | 34.70        | 37.82         | 22.15       | 43.83        |
| 80            | 13.75              | 0.76        | 1.61          | 3.08       | 2.89         | 9.87          | 10.22       | 21.64          | 2.29         | 43.87        | 47.42         | 19.32       | 51.20        |
| 84            | -9.02              | 0.43        | 1.09          | 2.69       | 1.18         | 7.70          | 6.54        | 12.01          | 0.87         | 29.83        | 32.11         | 10.78       | 33.87        |

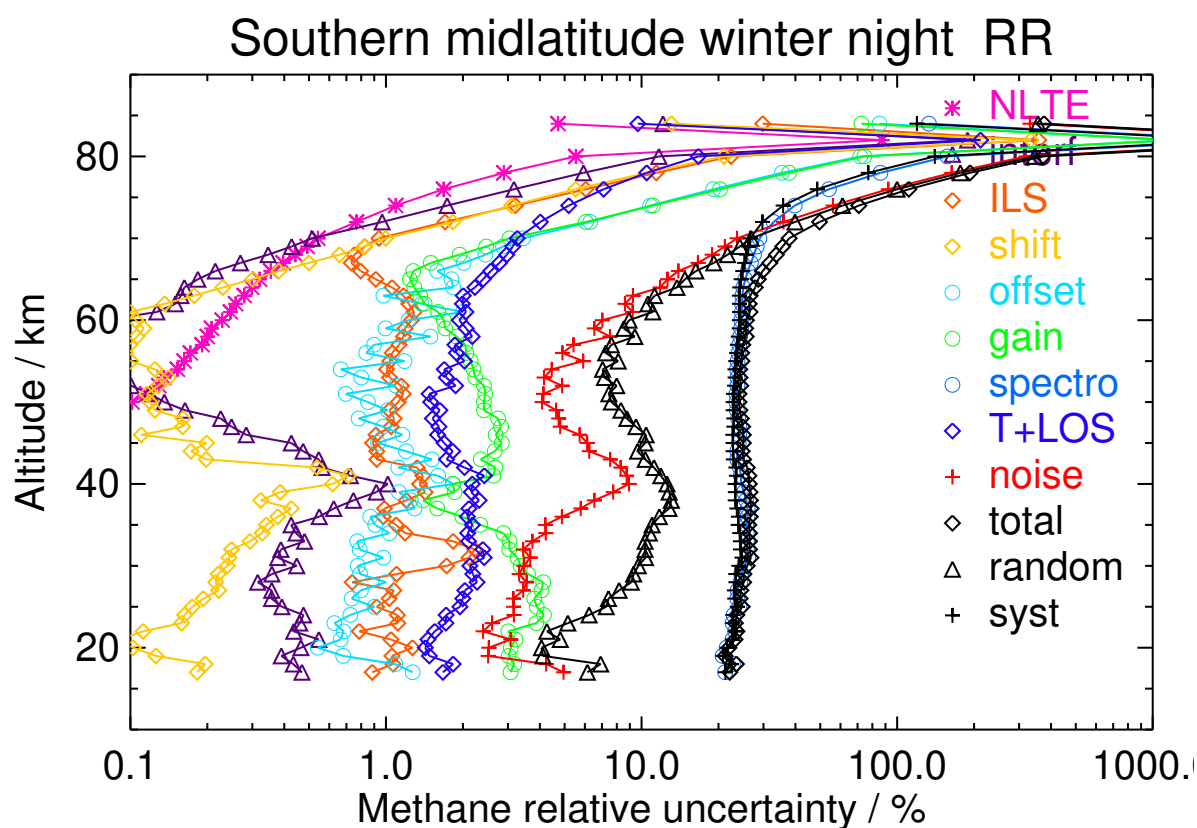

**Figure S88.** V8R\_CH4\_561 Southern midlatitude winter night

**Table S89.** Methane error budget for Southern midlatitude spring day. All uncertainties are  $1\sigma$ .

| altitude (km) | mean target (ppbv) | NLTE (ppbv) | interf (ppbv) | ILS (ppbv) | shift (ppbv) | offset (ppbv) | gain (ppbv) | spectro (ppbv) | T+LOS (ppbv) | noise (ppbv) | random (ppbv) | syst (ppbv) | total (ppbv) |
|---------------|--------------------|-------------|---------------|------------|--------------|---------------|-------------|----------------|--------------|--------------|---------------|-------------|--------------|
| 30            | 1173.89            | 0.04        | 4.33          | 34.34      | 3.08         | 7.81          | 37.47       | 312.93         | 19.80        | 31.94        | 94.94         | 304.95      | 319.39       |
| 35            | 708.47             | 0.06        | 2.34          | 6.73       | 2.41         | 5.06          | 17.97       | 175.62         | 13.01        | 19.10        | 51.32         | 170.72      | 178.27       |
| 40            | 370.61             | 0.14        | 1.65          | 3.70       | 1.28         | 3.69          | 6.78        | 77.93          | 5.47         | 16.58        | 25.07         | 76.34       | 80.35        |
| 45            | 254.93             | 0.23        | 1.21          | 2.57       | 0.40         | 1.36          | 4.98        | 54.31          | 3.42         | 10.86        | 14.05         | 54.01       | 55.80        |
| 50            | 265.67             | 0.35        | 0.54          | 2.31       | 0.24         | 2.11          | 5.41        | 57.83          | 4.00         | 9.50         | 11.89         | 57.87       | 59.08        |
| 55            | 236.60             | 0.45        | 0.24          | 2.04       | 0.23         | 2.20          | 4.57        | 52.85          | 4.56         | 10.47        | 12.56         | 52.87       | 54.35        |
| 60            | 213.49             | 0.50        | 0.14          | 2.73       | 0.16         | 1.90          | 3.73        | 50.01          | 3.82         | 9.93         | 12.44         | 49.85       | 51.38        |
| 65            | 161.11             | 0.29        | 0.22          | 1.30       | 0.20         | 2.31          | 1.66        | 39.41          | 3.18         | 14.40        | 17.02         | 38.62       | 42.20        |
| 70            | 91.97              | 0.32        | 0.36          | 0.73       | 0.46         | 2.25          | 2.02        | 26.39          | 2.46         | 19.49        | 21.25         | 25.31       | 33.05        |
| 74            | 35.04              | 1.00        | 1.28          | 1.86       | 1.87         | 5.19          | 9.32        | 24.45          | 2.77         | 30.80        | 33.05         | 24.19       | 40.96        |
| 80            | -12.76             | 1.56        | 2.32          | 3.24       | 3.80         | 9.45          | 17.01       | 33.51          | 3.18         | 43.50        | 46.41         | 35.82       | 58.62        |
| 84            | -12.30             | 0.94        | 1.47          | 2.13       | 2.44         | 6.72          | 10.54       | 20.98          | 1.33         | 28.91        | 30.77         | 22.37       | 38.05        |

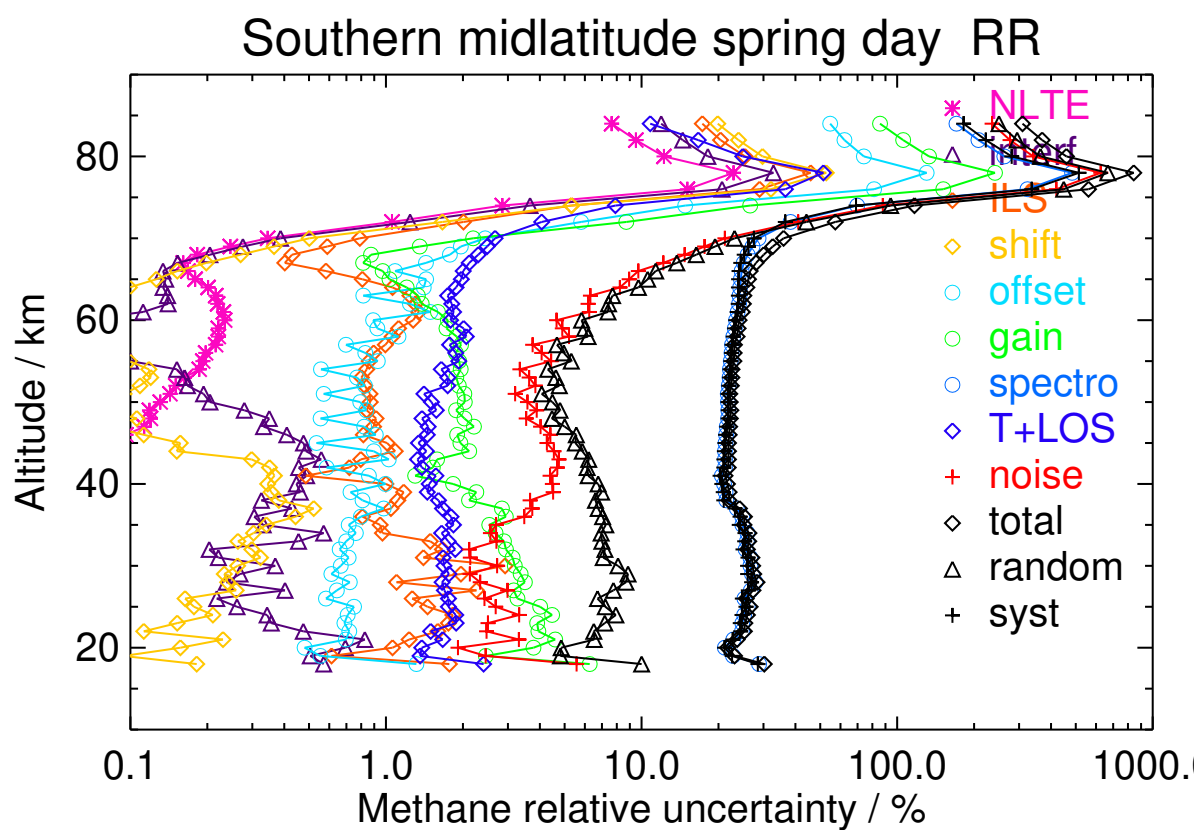

**Figure S89.** V8R\_CH4\_561 Southern midlatitude spring day



**Table S90.** Methane error budget for Southern midlatitude spring night. All uncertainties are  $1\sigma$ .

| altitude (km) | mean target (ppbv) | NLTE (ppbv) | interf (ppbv) | ILS (ppbv) | shift (ppbv) | offset (ppbv) | gain (ppbv) | spectro (ppbv) | T+LOS (ppbv) | noise (ppbv) | random (ppbv) | syst (ppbv) | total (ppbv) |
|---------------|--------------------|-------------|---------------|------------|--------------|---------------|-------------|----------------|--------------|--------------|---------------|-------------|--------------|
| 30            | 1158.47            | 0.02        | 4.10          | 11.09      | 3.47         | 8.46          | 44.51       | 292.64         | 19.05        | 29.83        | 92.64         | 283.75      | 298.49       |
| 35            | 782.99             | 0.04        | 2.90          | 8.53       | 2.73         | 5.48          | 25.03       | 189.68         | 13.20        | 20.92        | 62.64         | 182.79      | 193.22       |
| 40            | 371.72             | 0.06        | 1.49          | 4.42       | 1.10         | 3.94          | 6.92        | 77.37          | 5.83         | 16.79        | 23.47         | 76.40       | 79.93        |
| 45            | 255.09             | 0.10        | 1.18          | 2.09       | 0.42         | 1.60          | 5.21        | 54.25          | 3.30         | 10.68        | 13.40         | 54.07       | 55.71        |
| 50            | 261.98             | 0.18        | 0.56          | 2.02       | 0.21         | 1.78          | 5.15        | 56.95          | 3.88         | 9.00         | 11.97         | 56.83       | 58.08        |
| 55            | 248.65             | 0.28        | 0.19          | 2.25       | 0.27         | 2.38          | 5.07        | 55.19          | 5.17         | 11.38        | 13.71         | 55.23       | 56.91        |
| 60            | 217.12             | 0.28        | 0.17          | 2.71       | 0.17         | 2.36          | 3.64        | 50.81          | 4.26         | 11.22        | 13.75         | 50.62       | 52.46        |
| 65            | 146.58             | 0.16        | 0.25          | 1.37       | 0.20         | 1.99          | 1.29        | 36.61          | 3.55         | 14.73        | 17.34         | 35.74       | 39.72        |
| 70            | 75.57              | 0.39        | 0.50          | 0.95       | 0.54         | 2.39          | 3.02        | 24.25          | 2.70         | 20.26        | 22.80         | 22.41       | 31.97        |
| 74            | 23.61              | 0.72        | 1.10          | 1.86       | 1.53         | 5.40          | 8.18        | 23.17          | 3.06         | 31.35        | 33.64         | 22.37       | 40.40        |
| 80            | -12.89             | 0.93        | 1.90          | 3.38       | 3.15         | 9.35          | 14.56       | 31.23          | 3.21         | 43.49        | 46.08         | 32.86       | 56.59        |
| 84            | -10.15             | 0.56        | 1.28          | 2.54       | 2.11         | 6.66          | 9.45        | 20.40          | 1.29         | 28.53        | 30.57         | 21.06       | 37.12        |

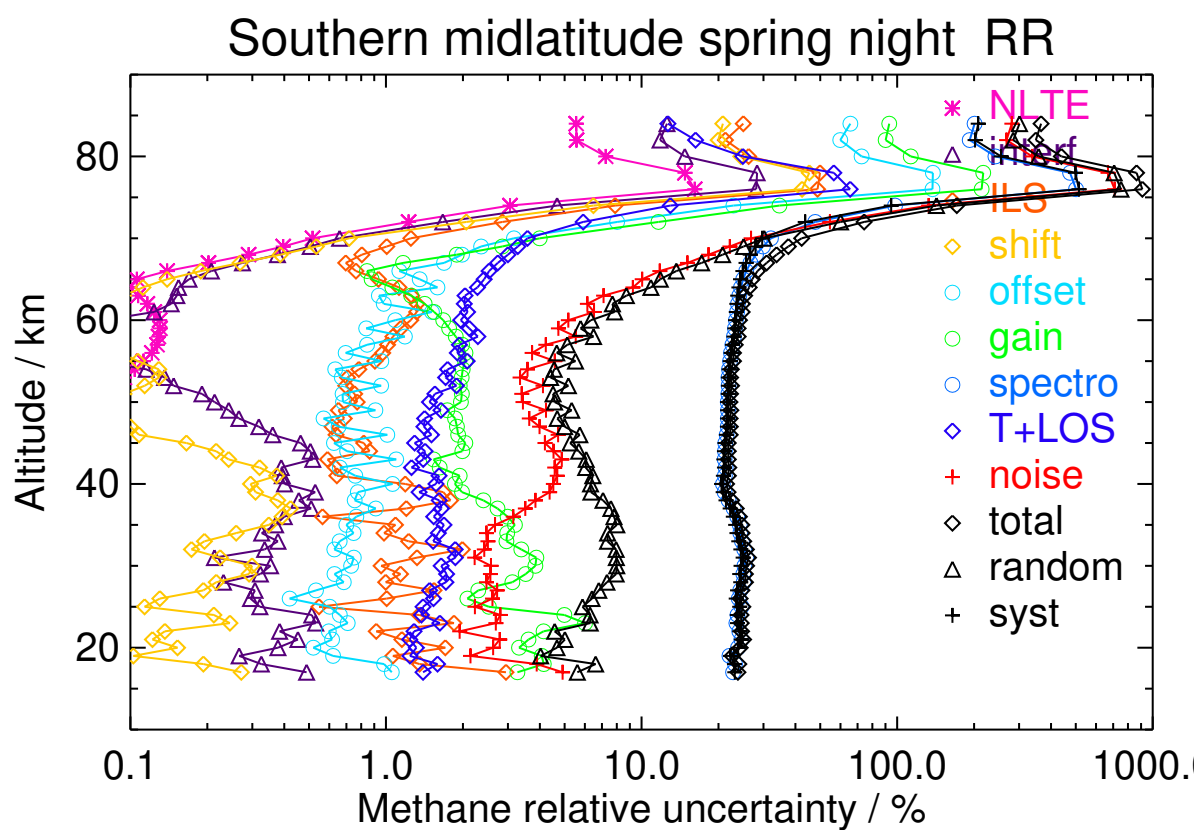

**Figure S90.** V8R\_CH4\_561 Southern midlatitude spring night

**Table S91.** Methane error budget for Southern midlatitude summer day. All uncertainties are  $1\sigma$ .

| altitude (km) | mean target (ppbv) | NLTE (ppbv) | interf (ppbv) | ILS (ppbv) | shift (ppbv) | offset (ppbv) | gain (ppbv) | spectro (ppbv) | T+LOS (ppbv) | noise (ppbv) | random (ppbv) | syst (ppbv) | total (ppbv) |
|---------------|--------------------|-------------|---------------|------------|--------------|---------------|-------------|----------------|--------------|--------------|---------------|-------------|--------------|
| 30            | 954.71             | 0.04        | 6.37          | 19.59      | 2.20         | 6.92          | 19.10       | 254.45         | 16.38        | 24.10        | 41.59         | 254.37      | 257.75       |
| 35            | 722.71             | 0.07        | 4.15          | 4.90       | 1.56         | 4.43          | 5.85        | 164.83         | 9.43         | 21.37        | 29.08         | 164.21      | 166.76       |
| 40            | 427.84             | 0.12        | 2.01          | 4.42       | 1.53         | 2.79          | 7.96        | 90.12          | 5.26         | 14.34        | 28.90         | 87.27       | 91.93        |
| 45            | 253.73             | 0.17        | 2.00          | 1.65       | 0.77         | 2.49          | 5.98        | 61.22          | 2.93         | 11.71        | 30.20         | 55.06       | 62.80        |
| 50            | 182.05             | 0.21        | 0.76          | 1.71       | 0.20         | 1.43          | 4.25        | 46.99          | 2.39         | 8.25         | 26.80         | 39.84       | 48.01        |
| 55            | 201.66             | 0.39        | 0.39          | 1.30       | 0.34         | 1.73          | 4.67        | 52.60          | 3.38         | 7.01         | 29.21         | 44.74       | 53.43        |
| 60            | 218.88             | 0.43        | 0.22          | 2.42       | 0.31         | 3.02          | 4.08        | 53.54          | 4.38         | 11.40        | 21.41         | 50.88       | 55.20        |
| 65            | 179.32             | 0.28        | 0.22          | 1.08       | 0.25         | 2.09          | 2.17        | 43.35          | 3.39         | 12.64        | 15.39         | 42.71       | 45.39        |
| 70            | 136.66             | 0.61        | 0.38          | 1.10       | 0.47         | 3.08          | 0.98        | 36.11          | 2.75         | 19.19        | 21.30         | 35.20       | 41.14        |
| 74            | 91.10              | 1.54        | 1.49          | 3.07       | 1.83         | 4.60          | 4.89        | 33.54          | 1.70         | 29.32        | 31.98         | 32.06       | 45.28        |
| 80            | 35.91              | 2.12        | 3.36          | 7.38       | 4.91         | 8.77          | 11.49       | 42.19          | 0.07         | 42.90        | 46.95         | 41.47       | 62.64        |
| 84            | 14.07              | 1.23        | 2.21          | 4.90       | 3.23         | 6.65          | 7.31        | 26.68          | 0.10         | 29.29        | 31.99         | 26.17       | 41.33        |

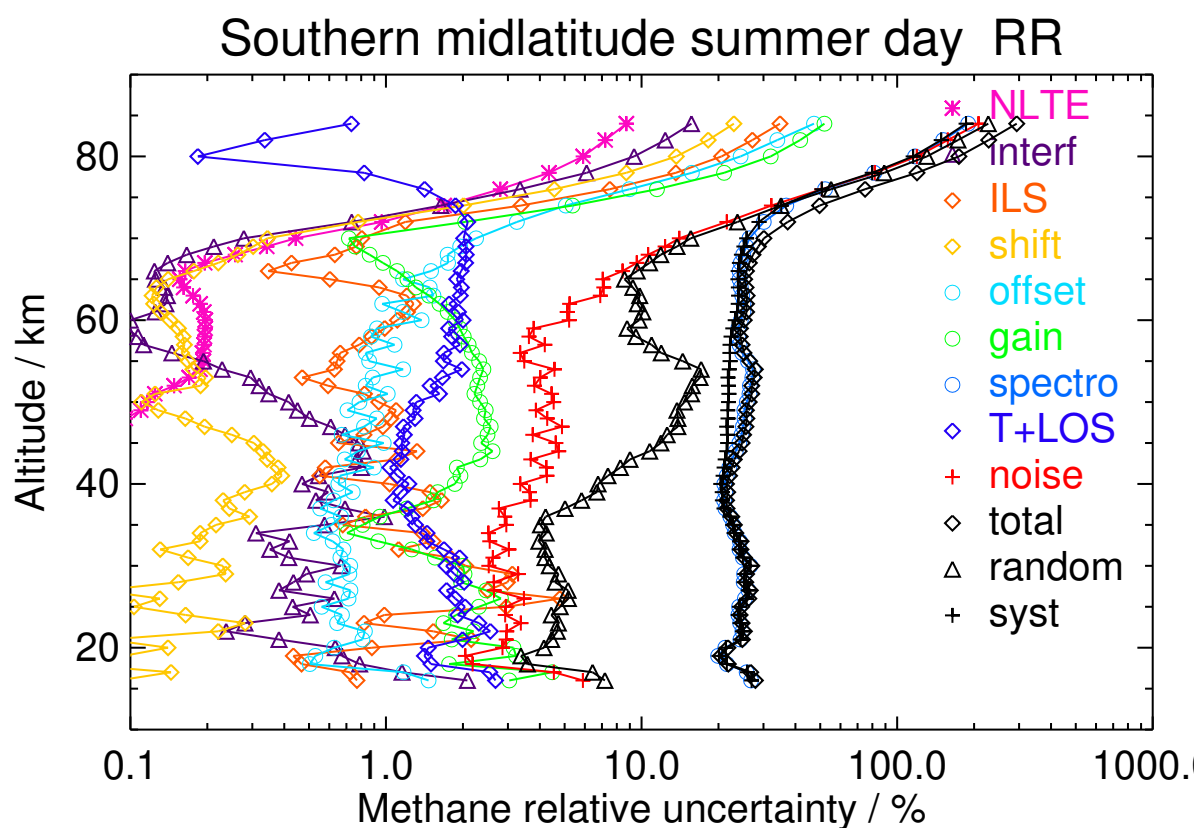

**Figure S91.** V8R\_CH4\_561 Southern midlatitude summer day

**Table S92.** Methane error budget for Southern midlatitude summer night. All uncertainties are  $1\sigma$ .

| altitude (km) | mean target (ppbv) | NLTE (ppbv) | interf (ppbv) | ILS (ppbv) | shift (ppbv) | offset (ppbv) | gain (ppbv) | spectro (ppbv) | T+LOS (ppbv) | noise (ppbv) | random (ppbv) | syst (ppbv) | total (ppbv) |
|---------------|--------------------|-------------|---------------|------------|--------------|---------------|-------------|----------------|--------------|--------------|---------------|-------------|--------------|
| 30            | 929.13             | 0.01        | 5.33          | 22.50      | 2.46         | 7.53          | 28.10       | 241.10         | 16.15        | 26.23        | 45.70         | 241.61      | 245.90       |
| 35            | 699.91             | 0.04        | 4.86          | 5.09       | 1.70         | 4.58          | 6.47        | 161.57         | 10.07        | 21.60        | 30.26         | 160.84      | 163.67       |
| 40            | 392.42             | 0.06        | 1.95          | 5.74       | 1.32         | 2.89          | 7.65        | 78.53          | 4.58         | 13.51        | 23.67         | 76.91       | 80.47        |
| 45            | 219.49             | 0.07        | 1.47          | 3.08       | 0.72         | 2.28          | 5.32        | 50.81          | 2.30         | 12.10        | 25.29         | 46.26       | 52.72        |
| 50            | 155.81             | 0.10        | 0.68          | 1.26       | 0.18         | 1.32          | 2.92        | 41.61          | 1.90         | 7.83         | 25.50         | 34.03       | 42.53        |
| 55            | 159.56             | 0.14        | 0.27          | 1.72       | 0.32         | 1.62          | 3.83        | 42.18          | 2.74         | 6.93         | 23.34         | 36.20       | 43.07        |
| 60            | 167.37             | 0.14        | 0.24          | 1.85       | 0.26         | 2.58          | 2.94        | 43.00          | 3.15         | 10.07        | 19.93         | 39.77       | 44.49        |
| 65            | 166.56             | 0.11        | 0.29          | 1.19       | 0.25         | 2.03          | 1.79        | 39.94          | 3.31         | 12.50        | 15.96         | 38.94       | 42.09        |
| 70            | 145.22             | 0.79        | 0.70          | 1.34       | 0.67         | 2.72          | 1.66        | 36.16          | 3.57         | 19.83        | 22.02         | 35.24       | 41.55        |
| 74            | 99.23              | 1.66        | 1.91          | 2.27       | 2.11         | 4.59          | 6.92        | 35.47          | 2.60         | 29.78        | 32.85         | 34.02       | 47.30        |
| 80            | 40.06              | 1.88        | 2.58          | 5.58       | 3.72         | 9.37          | 9.23        | 35.20          | 0.34         | 44.32        | 47.71         | 33.98       | 58.57        |
| 84            | 11.95              | 1.03        | 1.61          | 3.89       | 2.39         | 7.10          | 5.62        | 21.21          | 0.03         | 30.28        | 32.27         | 20.78       | 38.38        |

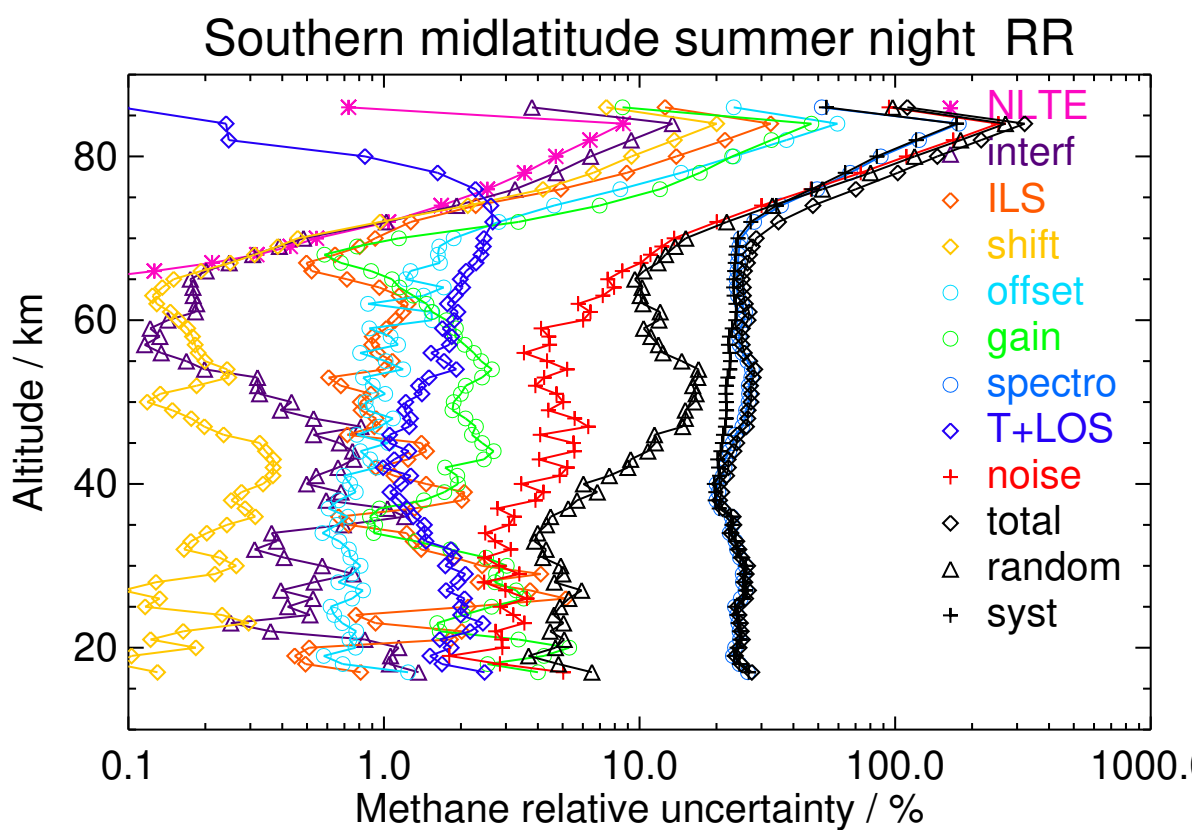

**Figure S92.** V8R\_CH4\_561 Southern midlatitude summer night

**Table S93.** Methane error budget for Southern midlatitude autumn day. All uncertainties are  $1\sigma$ .

| altitude (km) | mean target (ppbv) | NLTE (ppbv) | interf (ppbv) | ILS (ppbv) | shift (ppbv) | offset (ppbv) | gain (ppbv) | spectro (ppbv) | T+LOS (ppbv) | noise (ppbv) | random (ppbv) | syst (ppbv) | total (ppbv) |
|---------------|--------------------|-------------|---------------|------------|--------------|---------------|-------------|----------------|--------------|--------------|---------------|-------------|--------------|
| 30            | 961.59             | 0.03        | 3.89          | 23.68      | 2.35         | 6.78          | 22.42       | 236.57         | 20.23        | 31.52        | 53.74         | 235.81      | 241.86       |
| 35            | 700.44             | 0.06        | 1.88          | 5.17       | 1.17         | 4.72          | 13.57       | 166.04         | 11.60        | 20.10        | 48.28         | 161.29      | 168.37       |
| 40            | 561.95             | 0.26        | 1.71          | 4.73       | 1.56         | 4.85          | 9.75        | 123.69         | 8.05         | 22.27        | 43.71         | 118.73      | 126.52       |
| 45            | 442.62             | 0.42        | 1.64          | 3.41       | 0.52         | 2.40          | 12.31       | 99.00          | 5.76         | 14.05        | 28.57         | 96.89       | 101.01       |
| 50            | 356.38             | 0.57        | 0.87          | 2.65       | 0.35         | 2.81          | 8.74        | 80.11          | 5.87         | 12.98        | 20.04         | 79.45       | 81.93        |
| 55            | 323.39             | 0.79        | 0.28          | 2.32       | 0.29         | 3.08          | 7.85        | 72.07          | 7.37         | 14.53        | 17.79         | 72.26       | 74.41        |
| 60            | 263.56             | 0.63        | 0.17          | 2.93       | 0.21         | 2.50          | 4.61        | 61.40          | 5.93         | 13.11        | 15.28         | 61.48       | 63.35        |
| 65            | 158.20             | 0.27        | 0.24          | 1.74       | 0.23         | 2.18          | 1.55        | 39.11          | 4.10         | 15.87        | 18.02         | 38.52       | 42.53        |
| 70            | 69.45              | 0.27        | 0.27          | 0.70       | 0.30         | 2.70          | 1.46        | 21.82          | 2.39         | 20.18        | 21.51         | 20.90       | 29.99        |
| 74            | 41.21              | 0.85        | 0.83          | 1.09       | 0.85         | 6.07          | 6.03        | 18.73          | 2.57         | 32.44        | 34.21         | 17.77       | 38.55        |
| 80            | 20.47              | 1.53        | 1.73          | 2.22       | 2.17         | 10.03         | 13.04       | 27.57          | 3.34         | 43.75        | 46.80         | 27.95       | 54.51        |
| 84            | 2.77               | 0.99        | 1.28          | 1.73       | 1.49         | 7.15          | 9.33        | 19.47          | 1.67         | 28.66        | 30.69         | 20.19       | 36.73        |

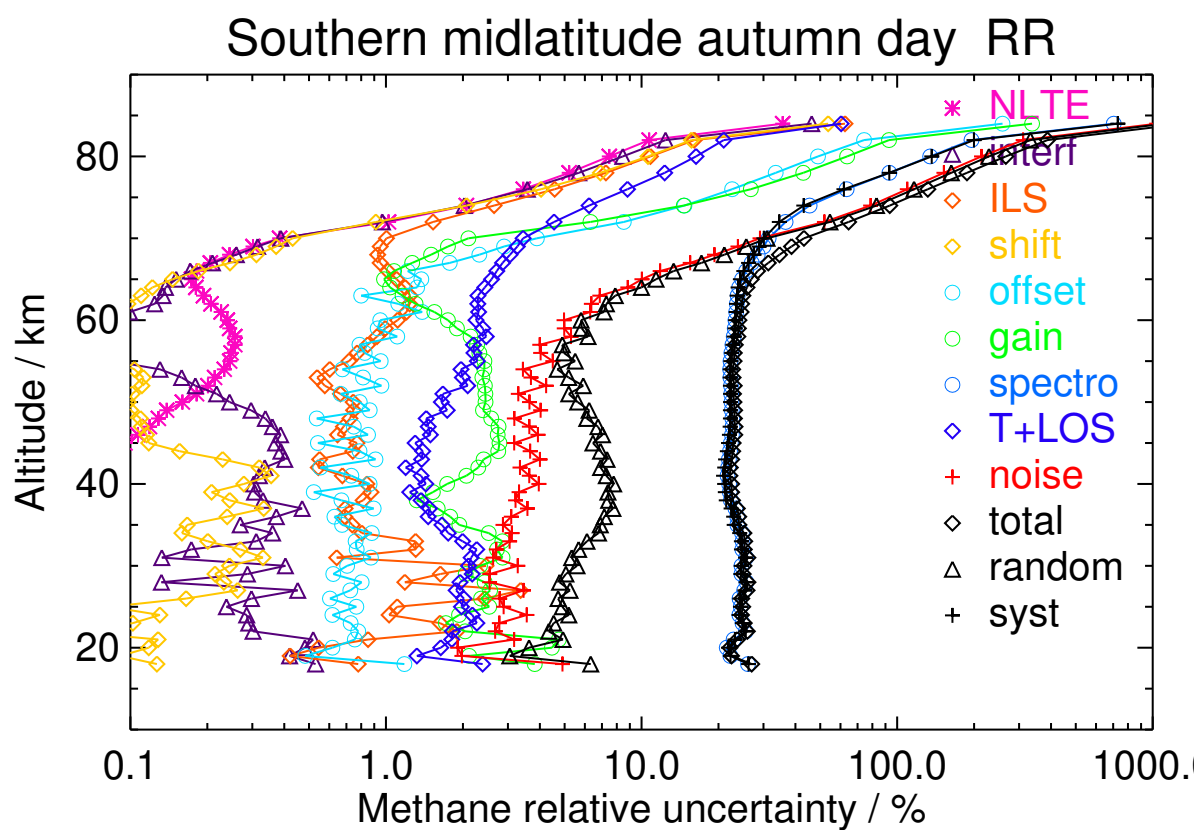

**Figure S93.** V8R\_CH4\_561 Southern midlatitude autumn day

**Table S94.** Methane error budget for Southern midlatitude autumn night. All uncertainties are  $1\sigma$ .

| altitude (km) | mean target (ppbv) | NLTE (ppbv) | interf (ppbv) | ILS (ppbv) | shift (ppbv) | offset (ppbv) | gain (ppbv) | spectro (ppbv) | T+LOS (ppbv) | noise (ppbv) | random (ppbv) | syst (ppbv) | total (ppbv) |
|---------------|--------------------|-------------|---------------|------------|--------------|---------------|-------------|----------------|--------------|--------------|---------------|-------------|--------------|
| 30            | 907.77             | 0.01        | 4.72          | 22.84      | 2.22         | 7.19          | 27.32       | 235.26         | 20.02        | 31.44        | 50.32         | 235.70      | 241.01       |
| 35            | 643.74             | 0.04        | 2.43          | 3.92       | 1.06         | 4.52          | 13.40       | 152.70         | 11.07        | 19.67        | 40.89         | 149.59      | 155.08       |
| 40            | 457.52             | 0.09        | 1.54          | 4.80       | 1.26         | 4.54          | 6.55        | 98.45          | 6.75         | 20.35        | 37.17         | 94.13       | 101.20       |
| 45            | 391.46             | 0.14        | 1.60          | 1.93       | 0.70         | 1.93          | 7.81        | 84.07          | 4.80         | 13.03        | 29.70         | 80.31       | 85.63        |
| 50            | 339.78             | 0.26        | 0.83          | 2.30       | 0.22         | 2.55          | 7.38        | 73.18          | 5.59         | 12.12        | 19.40         | 72.29       | 74.84        |
| 55            | 317.08             | 0.42        | 0.18          | 2.58       | 0.26         | 3.09          | 7.88        | 69.50          | 7.64         | 14.98        | 18.78         | 69.56       | 72.05        |
| 60            | 258.16             | 0.34        | 0.18          | 3.16       | 0.19         | 2.48          | 4.48        | 60.19          | 6.23         | 13.75        | 17.31         | 59.89       | 62.35        |
| 65            | 141.09             | 0.18        | 0.25          | 1.66       | 0.18         | 2.17          | 1.55        | 35.81          | 3.88         | 16.04        | 18.70         | 34.86       | 39.56        |
| 70            | 66.22              | 0.24        | 0.37          | 0.55       | 0.34         | 2.71          | 1.78        | 20.41          | 2.49         | 20.56        | 22.31         | 18.94       | 29.27        |
| 74            | 25.16              | 0.51        | 0.96          | 1.08       | 1.02         | 6.16          | 6.26        | 17.08          | 2.74         | 32.68        | 34.51         | 16.01       | 38.05        |
| 80            | -12.40             | 0.83        | 2.02          | 2.37       | 2.38         | 9.79          | 13.65       | 26.31          | 3.55         | 43.10        | 46.00         | 27.29       | 53.48        |
| 84            | -0.45              | 0.16        | 0.85          | 0.91       | 1.01         | 7.08          | 5.15        | 12.11          | 1.01         | 28.18        | 29.19         | 13.00       | 31.95        |

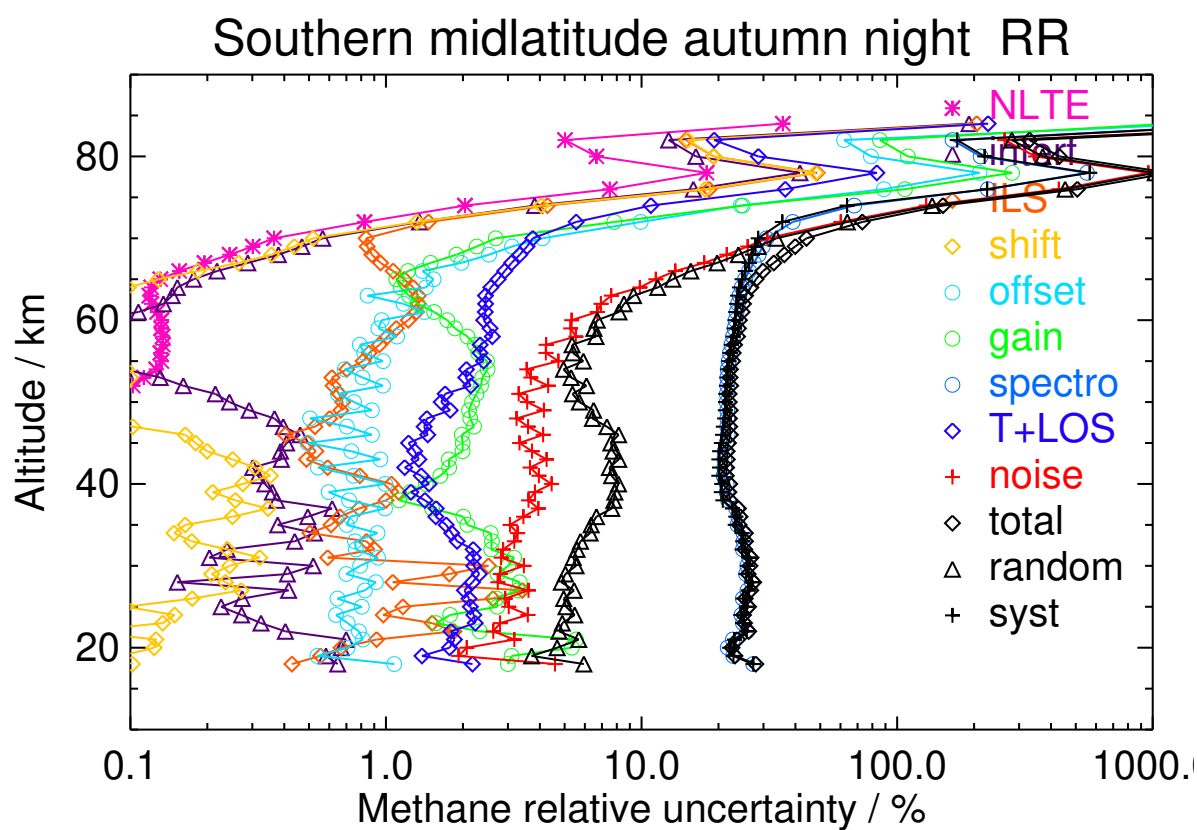

**Figure S94.** V8R\_CH4\_561 Southern midlatitude autumn night

**Table S95.** Methane error budget for Southern polar winter day. All uncertainties are  $1\sigma$ .

| altitude (km) | mean target (ppbv) | NLTE (ppbv) | interf (ppbv) | ILS (ppbv) | shift (ppbv) | offset (ppbv) | gain (ppbv) | spectro (ppbv) | T+LOS (ppbv) | noise (ppbv) | random (ppbv) | syst (ppbv) | total (ppbv) |
|---------------|--------------------|-------------|---------------|------------|--------------|---------------|-------------|----------------|--------------|--------------|---------------|-------------|--------------|
| 30            | 444.73             | 0.06        | 5.38          | 10.38      | 2.84         | 4.80          | 5.60        | 106.39         | 13.86        | 31.18        | 44.04         | 103.65      | 112.62       |
| 35            | 200.25             | 0.10        | 2.43          | 7.11       | 1.91         | 4.33          | 3.24        | 50.14          | 5.58         | 19.95        | 29.96         | 46.20       | 55.07        |
| 40            | 211.54             | 0.09        | 1.42          | 2.93       | 1.14         | 2.86          | 5.89        | 50.07          | 3.38         | 13.80        | 19.49         | 48.83       | 52.57        |
| 45            | 244.46             | 0.20        | 0.80          | 2.14       | 0.54         | 1.86          | 6.44        | 57.25          | 3.33         | 10.98        | 20.43         | 55.16       | 58.82        |
| 50            | 232.99             | 0.29        | 0.22          | 2.51       | 0.30         | 1.80          | 5.13        | 53.33          | 3.28         | 7.89         | 14.33         | 52.42       | 54.34        |
| 55            | 199.11             | 0.41        | 0.09          | 2.22       | 0.27         | 1.77          | 4.18        | 46.29          | 3.27         | 8.98         | 14.05         | 45.42       | 47.54        |
| 60            | 180.11             | 0.51        | 0.07          | 2.82       | 0.14         | 1.55          | 3.18        | 43.81          | 3.20         | 9.99         | 15.61         | 42.51       | 45.28        |
| 65            | 129.83             | 0.40        | 0.17          | 1.10       | 0.37         | 2.57          | 1.15        | 35.00          | 3.06         | 16.94        | 20.23         | 33.49       | 39.13        |
| 70            | 93.46              | 0.91        | 0.55          | 1.62       | 2.03         | 3.15          | 4.08        | 33.99          | 3.06         | 22.86        | 27.06         | 31.46       | 41.49        |
| 74            | 49.63              | 1.53        | 1.05          | 3.77       | 3.95         | 6.60          | 8.71        | 34.17          | 3.08         | 34.88        | 38.95         | 32.08       | 50.46        |
| 80            | 11.20              | 1.44        | 1.04          | 4.21       | 3.81         | 10.35         | 9.20        | 24.74          | 1.84         | 44.45        | 47.93         | 22.83       | 53.09        |
| 84            | 3.78               | 0.49        | 0.40          | 1.14       | 1.10         | 8.00          | 3.20        | 7.55           | 0.51         | 30.15        | 31.57         | 6.83        | 32.30        |

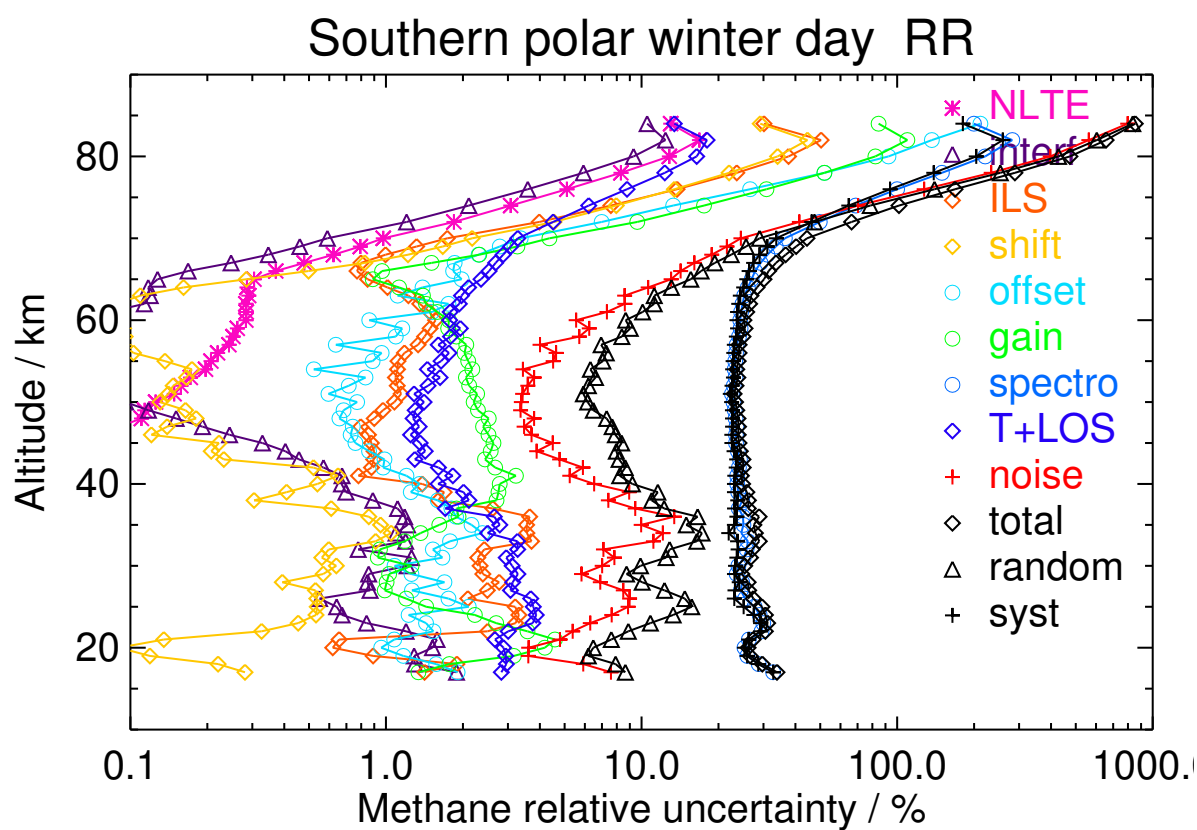

**Figure S95.** V8R\_CH4\_561 Southern polar winter day

**Table S96.** Methane error budget for Southern polar winter night. All uncertainties are  $1\sigma$ .

| altitude (km) | mean target (ppbv) | NLTE (ppbv) | interf (ppbv) | ILS (ppbv) | shift (ppbv) | offset (ppbv) | gain (ppbv) | spectro (ppbv) | T+LOS (ppbv) | noise (ppbv) | random (ppbv) | syst (ppbv) | total (ppbv) |
|---------------|--------------------|-------------|---------------|------------|--------------|---------------|-------------|----------------|--------------|--------------|---------------|-------------|--------------|
| 30            | 454.85             | 0.05        | 5.03          | 12.67      | 2.87         | 5.11          | 5.07        | 114.22         | 13.73        | 31.02        | 44.78         | 111.52      | 120.18       |
| 35            | 197.92             | 0.09        | 2.45          | 5.43       | 1.66         | 4.65          | 2.94        | 53.25          | 5.82         | 20.56        | 36.78         | 44.80       | 57.97        |
| 40            | 193.95             | 0.09        | 1.07          | 2.13       | 0.93         | 2.60          | 5.19        | 45.88          | 3.04         | 13.82        | 17.99         | 44.97       | 48.43        |
| 45            | 223.25             | 0.16        | 0.71          | 2.66       | 0.63         | 1.83          | 6.46        | 54.16          | 3.02         | 10.82        | 21.56         | 51.45       | 55.79        |
| 50            | 209.23             | 0.22        | 0.23          | 2.19       | 0.32         | 1.68          | 4.39        | 50.04          | 2.95         | 7.59         | 16.00         | 48.39       | 50.97        |
| 55            | 179.41             | 0.32        | 0.12          | 1.94       | 0.32         | 1.58          | 3.60        | 43.76          | 2.87         | 8.40         | 14.55         | 42.45       | 44.87        |
| 60            | 161.30             | 0.40        | 0.09          | 2.14       | 0.21         | 1.31          | 2.59        | 40.82          | 2.86         | 9.53         | 15.75         | 39.12       | 42.17        |
| 65            | 123.79             | 0.43        | 0.19          | 0.97       | 0.42         | 2.52          | 1.37        | 31.80          | 2.85         | 16.08        | 19.51         | 30.11       | 35.88        |
| 70            | 86.12              | 0.67        | 0.51          | 1.61       | 1.64         | 2.93          | 3.77        | 26.28          | 3.26         | 21.78        | 24.57         | 24.51       | 34.71        |
| 74            | 44.70              | 1.01        | 0.97          | 3.39       | 3.37         | 6.40          | 8.02        | 23.69          | 3.76         | 34.78        | 37.61         | 22.37       | 43.76        |
| 80            | 3.83               | 1.18        | 1.33          | 5.31       | 4.60         | 9.36          | 11.81       | 21.05          | 3.30         | 42.70        | 46.12         | 20.72       | 50.56        |
| 84            | -12.96             | 0.51        | 0.56          | 1.30       | 1.18         | 8.06          | 3.24        | 8.12           | 1.13         | 30.41        | 31.96         | 7.06        | 32.73        |

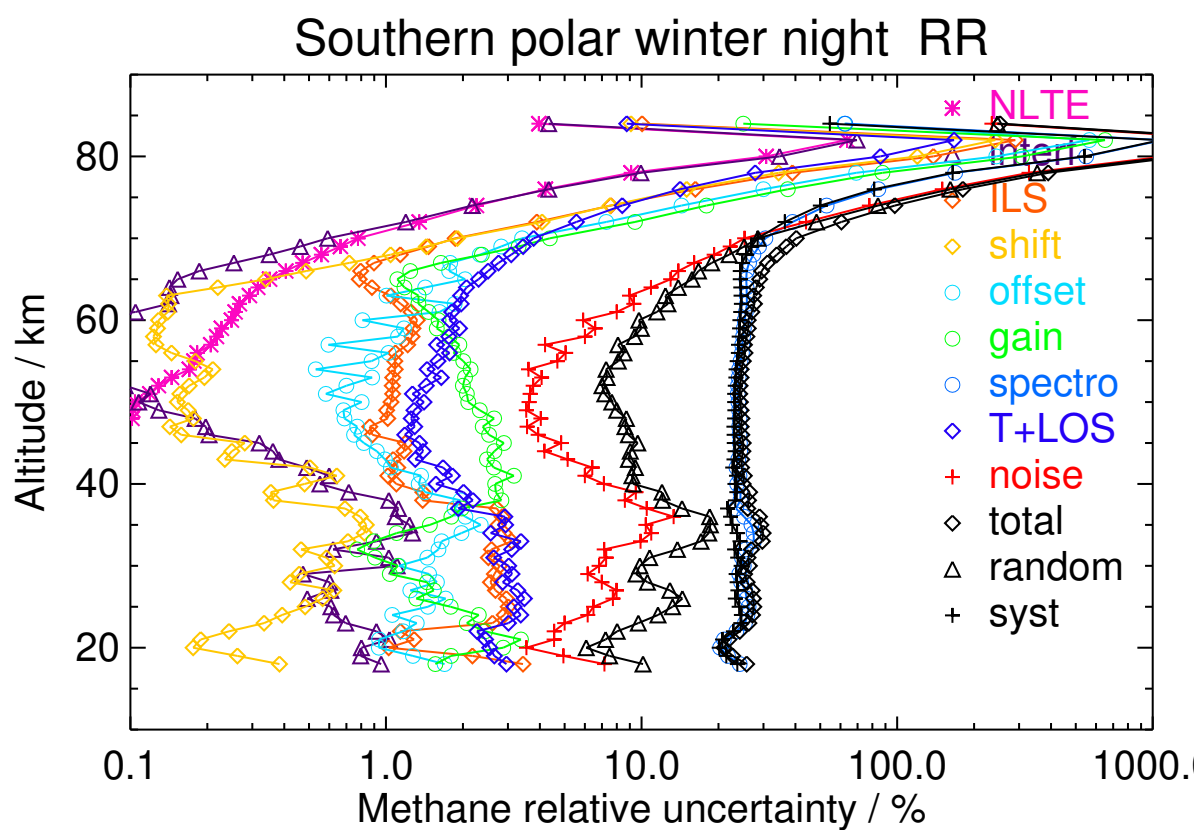

**Figure S96.** V8R\_CH4\_561 Southern polar winter night



**Table S97.** Methane error budget for Southern polar spring day. All uncertainties are  $1\sigma$ .

| altitude (km) | mean target (ppbv) | NLTE (ppbv) | interf (ppbv) | ILS (ppbv) | shift (ppbv) | offset (ppbv) | gain (ppbv) | spectro (ppbv) | T+LOS (ppbv) | noise (ppbv) | random (ppbv) | syst (ppbv) | total (ppbv) |
|---------------|--------------------|-------------|---------------|------------|--------------|---------------|-------------|----------------|--------------|--------------|---------------|-------------|--------------|
| 30            | 690.52             | 0.08        | 2.99          | 37.42      | 3.62         | 7.73          | 50.87       | 196.45         | 11.66        | 35.10        | 135.02        | 160.62      | 209.83       |
| 35            | 537.91             | 0.04        | 1.68          | 7.49       | 2.15         | 3.39          | 13.18       | 114.79         | 6.77         | 15.48        | 45.82         | 107.75      | 117.09       |
| 40            | 315.43             | 0.07        | 0.78          | 6.82       | 1.24         | 2.66          | 7.81        | 66.64          | 3.62         | 11.79        | 21.91         | 65.04       | 68.63        |
| 45            | 264.72             | 0.15        | 0.51          | 4.49       | 0.83         | 1.53          | 7.24        | 58.26          | 3.15         | 10.03        | 17.93         | 57.09       | 59.84        |
| 50            | 270.41             | 0.26        | 0.29          | 4.30       | 0.55         | 1.98          | 6.97        | 60.23          | 3.85         | 8.57         | 15.82         | 59.48       | 61.55        |
| 55            | 237.47             | 0.31        | 0.16          | 2.46       | 0.40         | 1.81          | 4.76        | 53.11          | 4.00         | 8.74         | 11.05         | 53.13       | 54.27        |
| 60            | 210.18             | 0.32        | 0.10          | 2.62       | 0.22         | 1.54          | 3.54        | 49.30          | 3.65         | 8.86         | 10.90         | 49.24       | 50.44        |
| 65            | 168.28             | 0.22        | 0.17          | 1.10       | 0.22         | 2.73          | 1.85        | 41.37          | 3.36         | 14.60        | 16.65         | 40.88       | 44.14        |
| 70            | 121.18             | 0.82        | 0.18          | 1.37       | 0.53         | 2.24          | 1.08        | 31.76          | 2.76         | 19.21        | 20.48         | 31.22       | 37.34        |
| 74            | 63.06              | 1.68        | 0.68          | 2.43       | 2.61         | 4.44          | 5.71        | 27.68          | 2.41         | 30.09        | 32.39         | 26.39       | 41.78        |
| 80            | 3.42               | 1.92        | 1.22          | 4.53       | 5.31         | 8.95          | 10.10       | 31.11          | 1.74         | 43.74        | 47.67         | 29.12       | 55.86        |
| 84            | -3.83              | 1.09        | 0.68          | 2.79       | 3.04         | 7.06          | 5.76        | 18.16          | 0.57         | 30.76        | 32.92         | 17.16       | 37.12        |

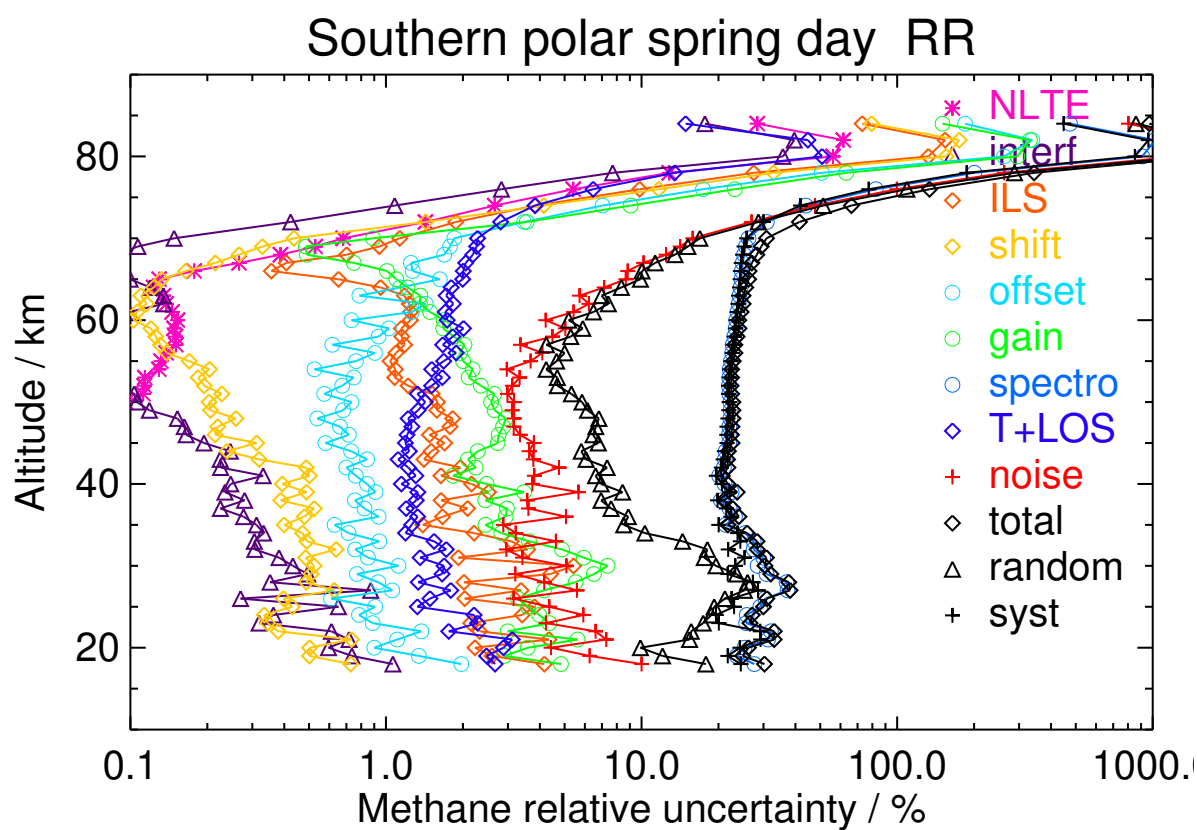

**Figure S97.** V8R\_CH4\_561 Southern polar spring day

**Table S98.** Methane error budget for Southern polar spring night. All uncertainties are  $1\sigma$ .

| altitude (km) | mean target (ppbv) | NLTE (ppbv) | interf (ppbv) | ILS (ppbv) | shift (ppbv) | offset (ppbv) | gain (ppbv) | spectro (ppbv) | T+LOS (ppbv) | noise (ppbv) | random (ppbv) | syst (ppbv) | total (ppbv) |
|---------------|--------------------|-------------|---------------|------------|--------------|---------------|-------------|----------------|--------------|--------------|---------------|-------------|--------------|
| 30            | 781.45             | 0.05        | 2.87          | 34.89      | 3.56         | 8.38          | 60.97       | 200.35         | 11.30        | 33.28        | 135.11        | 167.77      | 215.41       |
| 35            | 473.34             | 0.03        | 2.37          | 9.03       | 2.49         | 3.66          | 15.38       | 109.25         | 7.08         | 16.45        | 54.33         | 98.22       | 112.25       |
| 40            | 315.05             | 0.07        | 0.86          | 6.58       | 1.23         | 2.99          | 10.69       | 67.66          | 3.94         | 12.23        | 24.06         | 65.82       | 70.08        |
| 45            | 256.30             | 0.10        | 0.64          | 3.16       | 0.57         | 1.51          | 6.57        | 56.86          | 3.05         | 10.12        | 14.77         | 56.42       | 58.32        |
| 50            | 263.75             | 0.16        | 0.31          | 2.41       | 0.39         | 1.81          | 5.41        | 58.42          | 3.65         | 8.45         | 12.07         | 58.23       | 59.47        |
| 55            | 245.92             | 0.21        | 0.16          | 2.13       | 0.36         | 2.08          | 4.83        | 55.25          | 4.53         | 10.08        | 12.42         | 55.26       | 56.64        |
| 60            | 213.76             | 0.18        | 0.12          | 2.54       | 0.20         | 1.76          | 3.47        | 50.45          | 4.09         | 10.02        | 12.22         | 50.34       | 51.80        |
| 65            | 170.96             | 0.25        | 0.20          | 1.14       | 0.24         | 2.56          | 1.62        | 41.16          | 3.82         | 15.26        | 16.78         | 40.87       | 44.18        |
| 70            | 103.17             | 0.73        | 0.30          | 1.19       | 0.64         | 2.24          | 2.27        | 28.87          | 3.38         | 20.39        | 21.69         | 28.33       | 35.68        |
| 74            | 44.65              | 1.19        | 0.77          | 2.64       | 2.06         | 5.17          | 7.55        | 26.36          | 3.38         | 31.35        | 33.64         | 25.58       | 42.26        |
| 80            | -1.63              | 1.28        | 1.23          | 5.09       | 3.68         | 9.65          | 10.92       | 30.36          | 2.53         | 44.53        | 48.04         | 29.29       | 56.27        |
| 84            | -6.92              | 0.72        | 0.73          | 3.06       | 2.25         | 7.25          | 6.24        | 17.97          | 0.92         | 30.33        | 32.42         | 17.31       | 36.75        |

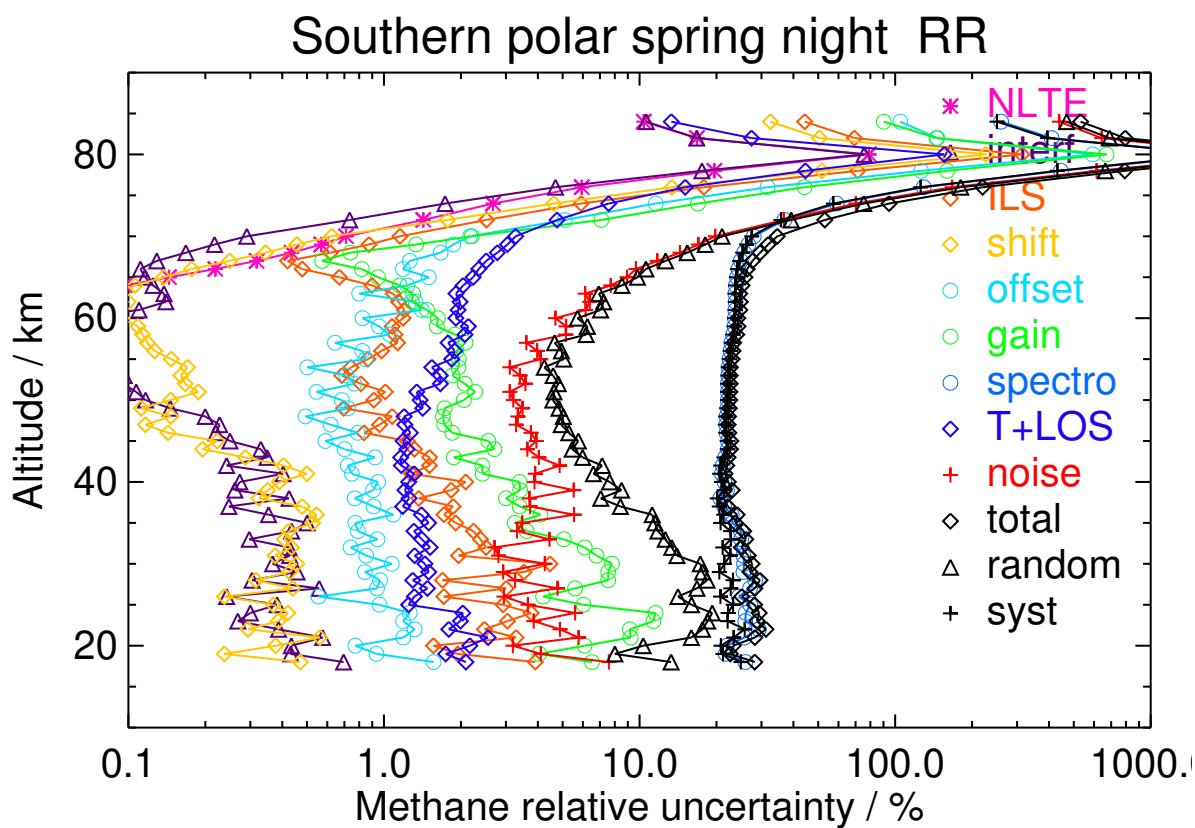

**Figure S98.** V8R\_CH4\_561 Southern polar spring night

**Table S99.** Methane error budget for Southern polar summer day. All uncertainties are  $1\sigma$ .

| altitude (km) | mean target (ppbv) | NLTE (ppbv) | interf (ppbv) | ILS (ppbv) | shift (ppbv) | offset (ppbv) | gain (ppbv) | spectro (ppbv) | T+LOS (ppbv) | noise (ppbv) | random (ppbv) | syst (ppbv) | total (ppbv) |
|---------------|--------------------|-------------|---------------|------------|--------------|---------------|-------------|----------------|--------------|--------------|---------------|-------------|--------------|
| 30            | 930.86             | 0.03        | 1.84          | 43.32      | 1.16         | 8.75          | 49.44       | 252.44         | 19.74        | 33.07        | 54.52         | 258.14      | 263.83       |
| 35            | 648.39             | 0.06        | 1.15          | 5.59       | 0.96         | 3.88          | 10.33       | 139.62         | 9.24         | 18.02        | 26.49         | 139.13      | 141.63       |
| 40            | 405.07             | 0.11        | 0.98          | 4.83       | 1.34         | 3.00          | 9.46        | 79.31          | 3.65         | 17.14        | 23.18         | 78.64       | 81.98        |
| 45            | 179.60             | 0.12        | 0.55          | 4.69       | 0.79         | 2.32          | 6.08        | 38.95          | 2.77         | 15.74        | 19.59         | 38.13       | 42.87        |
| 50            | 82.79              | 0.03        | 0.10          | 0.71       | 0.17         | 1.12          | 0.88        | 20.31          | 0.90         | 6.74         | 8.83          | 19.58       | 21.48        |
| 55            | 74.53              | 0.06        | 0.09          | 0.65       | 0.20         | 1.01          | 1.05        | 17.51          | 0.93         | 4.50         | 6.65          | 16.91       | 18.17        |
| 60            | 97.80              | 0.13        | 0.06          | 1.16       | 0.17         | 1.08          | 1.53        | 23.66          | 1.19         | 4.94         | 8.48          | 22.77       | 24.30        |
| 65            | 108.63             | 0.15        | 0.16          | 1.12       | 0.17         | 2.25          | 1.34        | 27.07          | 1.68         | 9.92         | 12.39         | 26.25       | 29.02        |
| 70            | 110.32             | 0.31        | 0.12          | 1.30       | 0.43         | 2.05          | 1.15        | 27.77          | 1.51         | 14.87        | 16.82         | 26.82       | 31.66        |
| 74            | 102.10             | 1.44        | 0.68          | 2.51       | 1.34         | 3.39          | 3.83        | 32.09          | 1.01         | 25.69        | 27.98         | 30.73       | 41.56        |
| 80            | 79.70              | 3.11        | 1.88          | 3.91       | 6.71         | 6.69          | 9.19        | 48.31          | 0.42         | 38.79        | 42.17         | 47.57       | 63.57        |
| 84            | 52.74              | 2.29        | 1.28          | 4.98       | 5.53         | 6.21          | 5.66        | 32.67          | 0.39         | 31.92        | 34.07         | 32.53       | 47.11        |

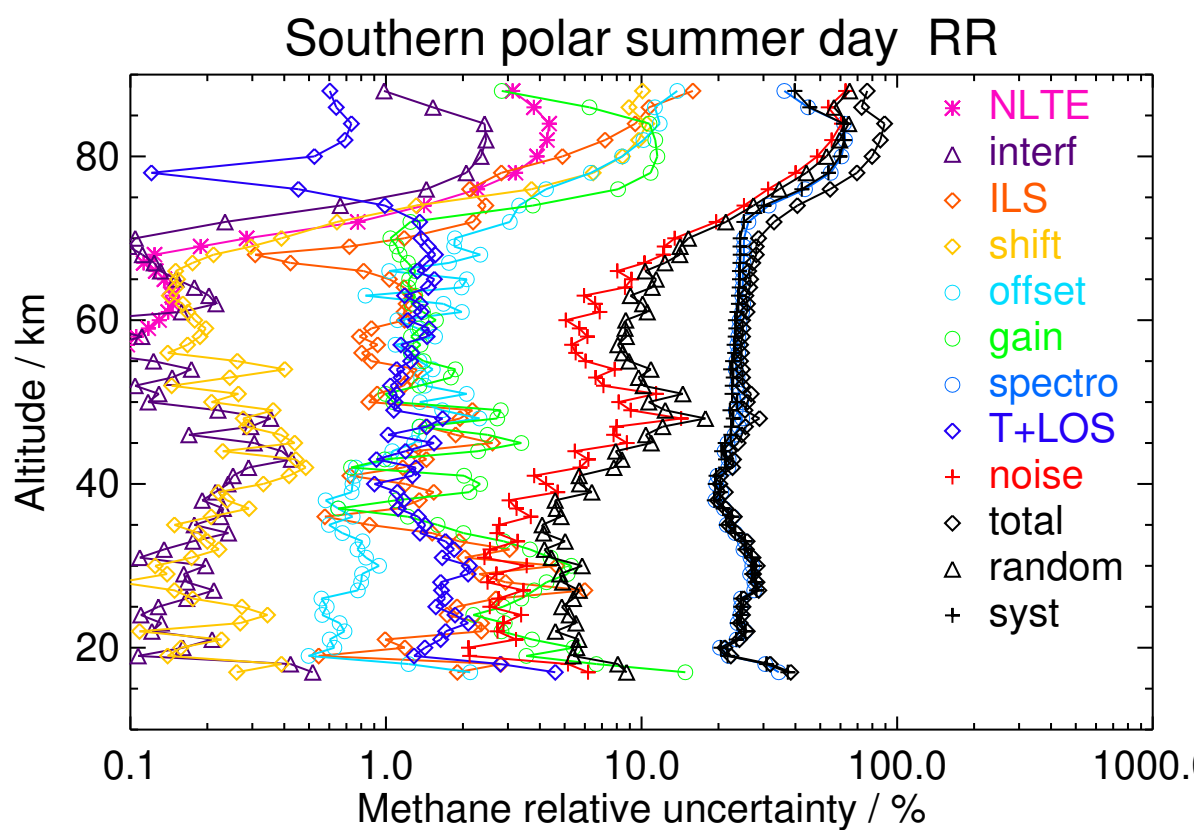

**Figure S99.** V8R\_CH4\_561 Southern polar summer day

**Table S100.** Methane error budget for Southern polar summer night. All uncertainties are  $1\sigma$ .

| altitude (km) | mean target (ppbv) | NLTE (ppbv) | interf (ppbv) | ILS (ppbv) | shift (ppbv) | offset (ppbv) | gain (ppbv) | spectro (ppbv) | T+LOS (ppbv) | noise (ppbv) | random (ppbv) | syst (ppbv) | total (ppbv) |
|---------------|--------------------|-------------|---------------|------------|--------------|---------------|-------------|----------------|--------------|--------------|---------------|-------------|--------------|
| 30            | 855.21             | <0.01       | 4.15          | 26.23      | 1.66         | 9.32          | 51.51       | 227.79         | 21.11        | 32.63        | 49.53         | 233.22      | 238.42       |
| 35            | 548.37             | 0.02        | 2.02          | 3.15       | 1.03         | 4.52          | 13.25       | 123.07         | 9.22         | 18.45        | 27.93         | 122.48      | 125.63       |
| 40            | 240.44             | 0.04        | 2.23          | 2.52       | 1.19         | 3.17          | 3.41        | 51.79          | 2.84         | 17.49        | 22.40         | 50.30       | 55.06        |
| 45            | 83.82              | 0.05        | 1.13          | 2.22       | 0.39         | 2.55          | 2.77        | 22.50          | 1.66         | 16.14        | 19.69         | 20.05       | 28.11        |
| 50            | 55.44              | 0.03        | 0.20          | 1.05       | 0.11         | 1.28          | 1.12        | 13.40          | 0.69         | 6.46         | 7.43          | 13.07       | 15.03        |
| 55            | 73.82              | 0.06        | 0.11          | 0.55       | 0.11         | 1.34          | 1.03        | 17.79          | 1.22         | 5.94         | 7.95          | 17.12       | 18.88        |
| 60            | 92.28              | 0.12        | 0.09          | 1.06       | 0.10         | 1.44          | 1.49        | 23.19          | 1.58         | 7.41         | 10.13         | 22.32       | 24.51        |
| 65            | 137.04             | 0.13        | 0.23          | 0.78       | 0.18         | 2.51          | 1.60        | 32.82          | 2.69         | 13.38        | 15.26         | 32.25       | 35.68        |
| 70            | 128.41             | 0.39        | 0.56          | 1.07       | 0.64         | 2.65          | 1.17        | 32.63          | 2.95         | 19.43        | 20.69         | 32.14       | 38.23        |
| 74            | 91.87              | 1.16        | 2.13          | 1.65       | 2.81         | 4.67          | 8.12        | 39.62          | 2.24         | 30.12        | 32.43         | 39.18       | 50.86        |
| 80            | 32.95              | 1.46        | 2.68          | 2.19       | 4.64         | 8.86          | 11.67       | 45.65          | 0.31         | 44.37        | 46.75         | 46.01       | 65.59        |
| 84            | 4.07               | 0.77        | 1.58          | 1.85       | 3.06         | 6.34          | 7.37        | 28.40          | 0.03         | 28.98        | 30.64         | 28.61       | 41.92        |

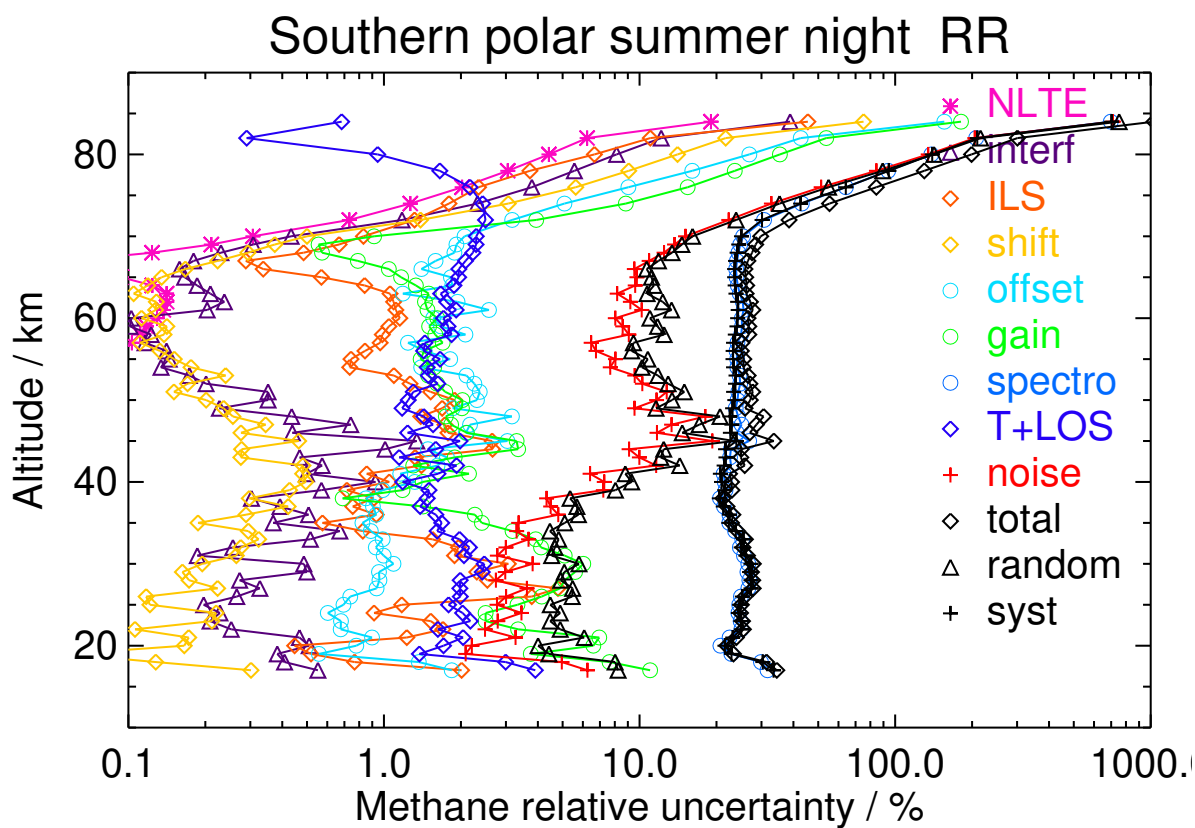

**Figure S100.** V8R\_CH4\_561 Southern polar summer night

**Table S101.** Methane error budget for Southern polar autumn day. All uncertainties are  $1\sigma$ .

| altitude (km) | mean target (ppbv) | NLTE (ppbv) | interf (ppbv) | ILS (ppbv) | shift (ppbv) | offset (ppbv) | gain (ppbv) | spectro (ppbv) | T+LOS (ppbv) | noise (ppbv) | random (ppbv) | syst (ppbv) | total (ppbv) |
|---------------|--------------------|-------------|---------------|------------|--------------|---------------|-------------|----------------|--------------|--------------|---------------|-------------|--------------|
| 30            | 707.93             | 0.08        | 1.51          | 9.72       | 1.19         | 5.44          | 26.58       | 178.83         | 18.00        | 30.43        | 50.07         | 177.65      | 184.57       |
| 35            | 289.81             | 0.06        | 1.49          | 4.66       | 0.81         | 4.59          | 5.37        | 77.26          | 8.06         | 19.86        | 36.09         | 72.11       | 80.64        |
| 40            | 82.49              | 0.05        | 0.52          | 1.86       | 0.36         | 2.29          | 2.96        | 21.14          | 2.07         | 13.24        | 16.70         | 19.11       | 25.38        |
| 45            | 76.27              | 0.10        | 0.28          | 0.81       | 0.38         | 1.29          | 2.40        | 19.59          | 1.93         | 9.80         | 13.49         | 17.61       | 22.18        |
| 50            | 178.13             | 0.32        | 0.18          | 1.54       | 0.12         | 2.40          | 3.74        | 40.88          | 3.36         | 10.40        | 15.70         | 39.58       | 42.58        |
| 55            | 210.81             | 0.55        | 0.09          | 2.34       | 0.13         | 1.80          | 4.34        | 48.06          | 3.71         | 9.60         | 13.77         | 47.47       | 49.43        |
| 60            | 153.02             | 0.52        | 0.05          | 2.55       | 0.07         | 1.27          | 2.80        | 37.54          | 3.13         | 10.68        | 14.29         | 36.68       | 39.37        |
| 65            | 84.87              | 0.36        | 0.12          | 1.30       | 0.14         | 2.37          | 1.26        | 23.42          | 1.98         | 16.11        | 18.48         | 21.90       | 28.66        |
| 70            | 53.41              | 0.16        | 0.18          | 0.43       | 0.51         | 2.83          | 0.59        | 17.34          | 1.71         | 21.28        | 22.47         | 16.14       | 27.67        |
| 74            | 23.50              | 0.21        | 0.30          | 0.50       | 0.92         | 6.59          | 0.99        | 14.70          | 1.63         | 33.82        | 34.95         | 13.65       | 37.52        |
| 80            | -8.41              | 0.41        | 0.43          | 0.68       | 1.37         | 10.37         | 1.76        | 12.45          | 1.29         | 44.30        | 45.85         | 11.41       | 47.24        |
| 84            | -0.15              | 0.31        | 0.28          | 0.34       | 0.91         | 7.34          | 1.39        | 7.91           | 0.63         | 29.00        | 30.12         | 7.33        | 31.00        |

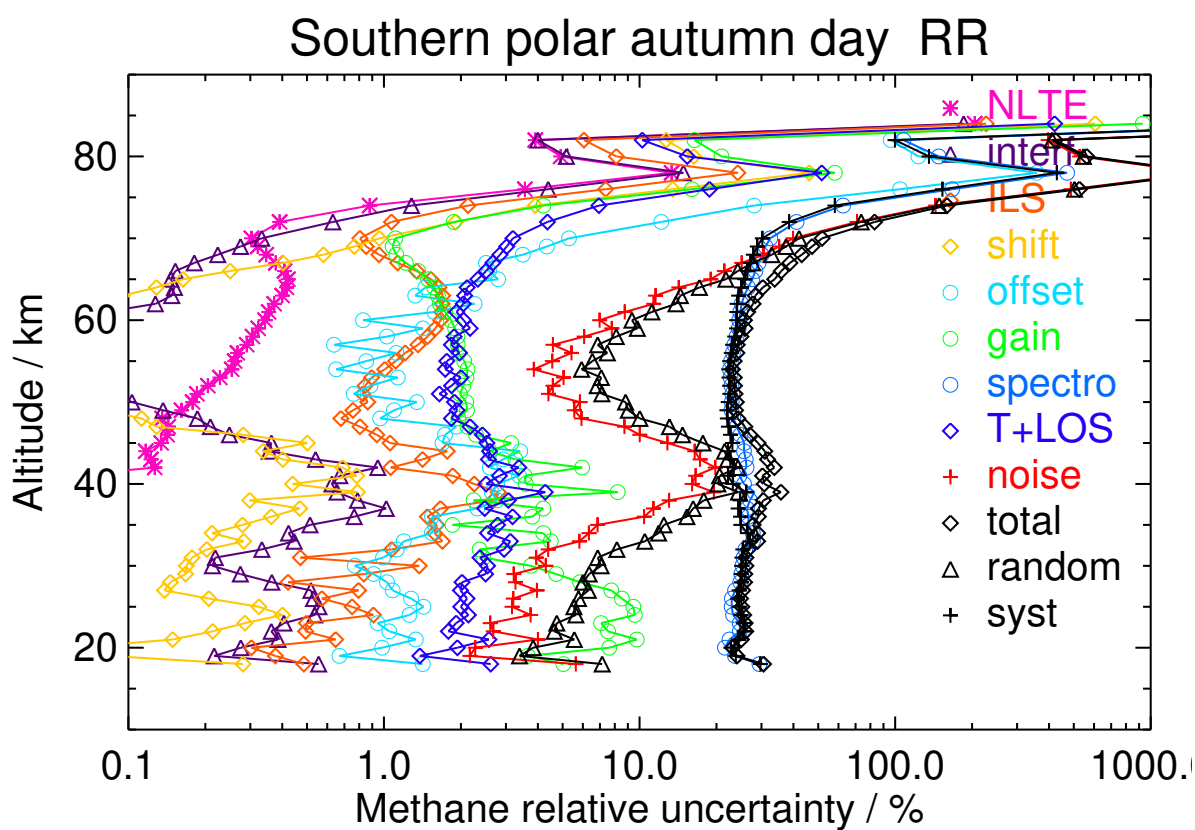

**Figure S101.** V8R\_CH4\_561 Southern polar autumn day

**Table S102.** Methane error budget for Southern polar autumn night. All uncertainties are  $1\sigma$ .

| altitude (km) | mean target (ppbv) | NLTE (ppbv) | interf (ppbv) | ILS (ppbv) | shift (ppbv) | offset (ppbv) | gain (ppbv) | spectro (ppbv) | T+LOS (ppbv) | noise (ppbv) | random (ppbv) | syst (ppbv) | total (ppbv) |
|---------------|--------------------|-------------|---------------|------------|--------------|---------------|-------------|----------------|--------------|--------------|---------------|-------------|--------------|
| 30            | 645.79             | 0.06        | 2.48          | 7.61       | 1.13         | 5.29          | 17.55       | 173.23         | 18.61        | 30.79        | 48.14         | 171.43      | 178.06       |
| 35            | 222.66             | 0.06        | 1.40          | 4.33       | 0.87         | 4.25          | 5.45        | 58.62          | 6.74         | 18.55        | 32.28         | 53.41       | 62.41        |
| 40            | 66.43              | 0.04        | 0.47          | 1.29       | 0.31         | 2.27          | 2.50        | 16.89          | 1.88         | 12.79        | 15.87         | 14.63       | 21.58        |
| 45            | 103.21             | 0.08        | 0.29          | 0.79       | 0.38         | 1.24          | 1.73        | 24.75          | 2.19         | 9.59         | 12.97         | 23.38       | 26.74        |
| 50            | 182.78             | 0.24        | 0.21          | 1.30       | 0.15         | 2.36          | 3.56        | 42.45          | 3.43         | 10.43        | 14.49         | 41.63       | 44.08        |
| 55            | 198.54             | 0.43        | 0.09          | 2.21       | 0.13         | 1.71          | 4.17        | 47.19          | 3.69         | 9.90         | 14.96         | 46.27       | 48.63        |
| 60            | 131.47             | 0.41        | 0.06          | 2.13       | 0.07         | 1.22          | 2.47        | 33.90          | 2.88         | 10.56        | 15.89         | 32.08       | 35.80        |
| 65            | 60.97              | 0.26        | 0.14          | 1.02       | 0.13         | 2.29          | 0.82        | 18.13          | 1.69         | 16.05        | 18.38         | 16.08       | 24.42        |
| 70            | 33.33              | 0.20        | 0.17          | 0.33       | 0.34         | 2.91          | 0.77        | 11.14          | 1.37         | 20.86        | 21.78         | 9.80        | 23.88        |
| 74            | 17.04              | 0.26        | 0.45          | 0.51       | 0.99         | 6.80          | 2.55        | 10.56          | 1.86         | 34.61        | 35.82         | 9.16        | 36.97        |
| 80            | -1.16              | 0.46        | 0.82          | 1.09       | 1.88         | 9.83          | 4.74        | 11.34          | 2.22         | 43.34        | 45.11         | 10.07       | 46.22        |
| 84            | 38.62              | 0.16        | 0.79          | 0.20       | 0.80         | 7.20          | 4.36        | 7.38           | 1.45         | 28.87        | 29.82         | 8.53        | 31.02        |

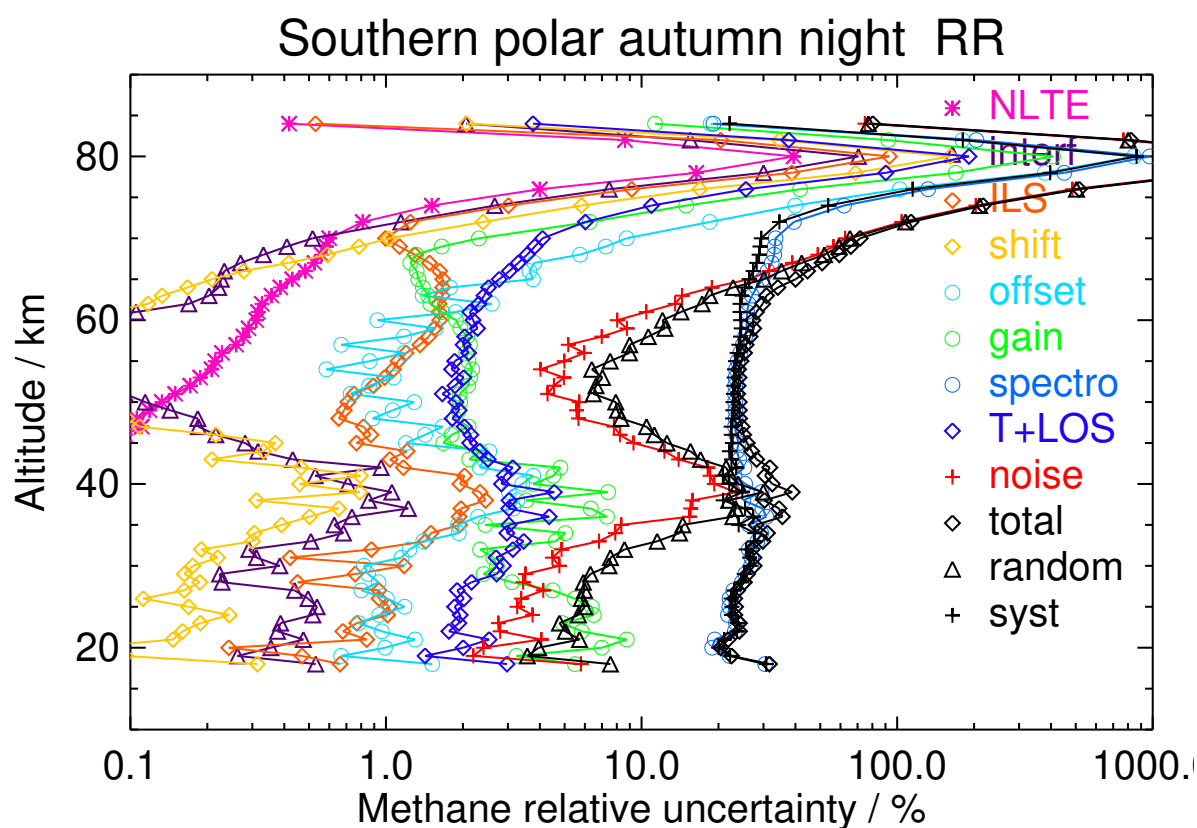

**Figure S102.** V8R\_CH4\_561 Southern polar autumn night

**Table S103.** Methane error budget for Northern polar winter day. All uncertainties are  $1\sigma$ .

| altitude (km) | mean target (ppbv) | NLTE (ppbv) | interf (ppbv) | ILS (ppbv) | shift (ppbv) | offset (ppbv) | gain (ppbv) | spectro (ppbv) | T+LOS (ppbv) | noise (ppbv) | random (ppbv) | syst (ppbv) | total (ppbv) |
|---------------|--------------------|-------------|---------------|------------|--------------|---------------|-------------|----------------|--------------|--------------|---------------|-------------|--------------|
| 40            | 355.73             | 0.22        | 0.38          | 6.34       | 0.21         | 5.76          | 14.09       | 71.90          | 7.53         | 29.91        | 32.84         | 72.90       | 79.95        |
| 45            | 221.50             | 0.27        | 0.06          | 2.56       | 0.22         | 2.11          | 7.54        | 43.79          | 4.16         | 13.20        | 14.98         | 44.19       | 46.66        |
| 50            | 148.44             | 0.31        | 0.03          | 0.86       | 0.10         | 1.61          | 3.75        | 32.37          | 2.86         | 10.76        | 11.63         | 32.47       | 34.49        |
| 55            | 106.72             | 0.29        | 0.03          | 1.01       | 0.05         | 1.43          | 2.28        | 26.38          | 2.40         | 10.80        | 13.05         | 25.62       | 28.75        |
| 60            | 40.13              | 0.14        | <0.01         | 0.73       | 0.01         | 1.13          | 0.77        | 11.65          | 0.94         | 7.37         | 9.32          | 10.32       | 13.91        |
| 65            | 20.49              | 0.09        | 0.02          | 0.44       | 0.02         | 1.36          | 0.30        | 5.98           | 0.47         | 7.14         | 7.80          | 5.32        | 9.44         |
| 70            | 14.65              | 0.09        | 0.01          | 0.29       | 0.02         | 1.79          | 0.18        | 3.94           | 0.31         | 8.24         | 8.54          | 3.73        | 9.32         |
| 74            | 16.76              | 0.26        | 0.02          | 0.31       | 0.03         | 3.62          | 0.20        | 4.49           | 0.33         | 16.64        | 17.18         | 3.94        | 17.62        |
| 80            | 24.12              | 0.74        | 0.02          | 0.44       | 0.04         | 6.22          | 0.29        | 6.08           | 0.37         | 28.24        | 29.17         | 4.82        | 29.56        |

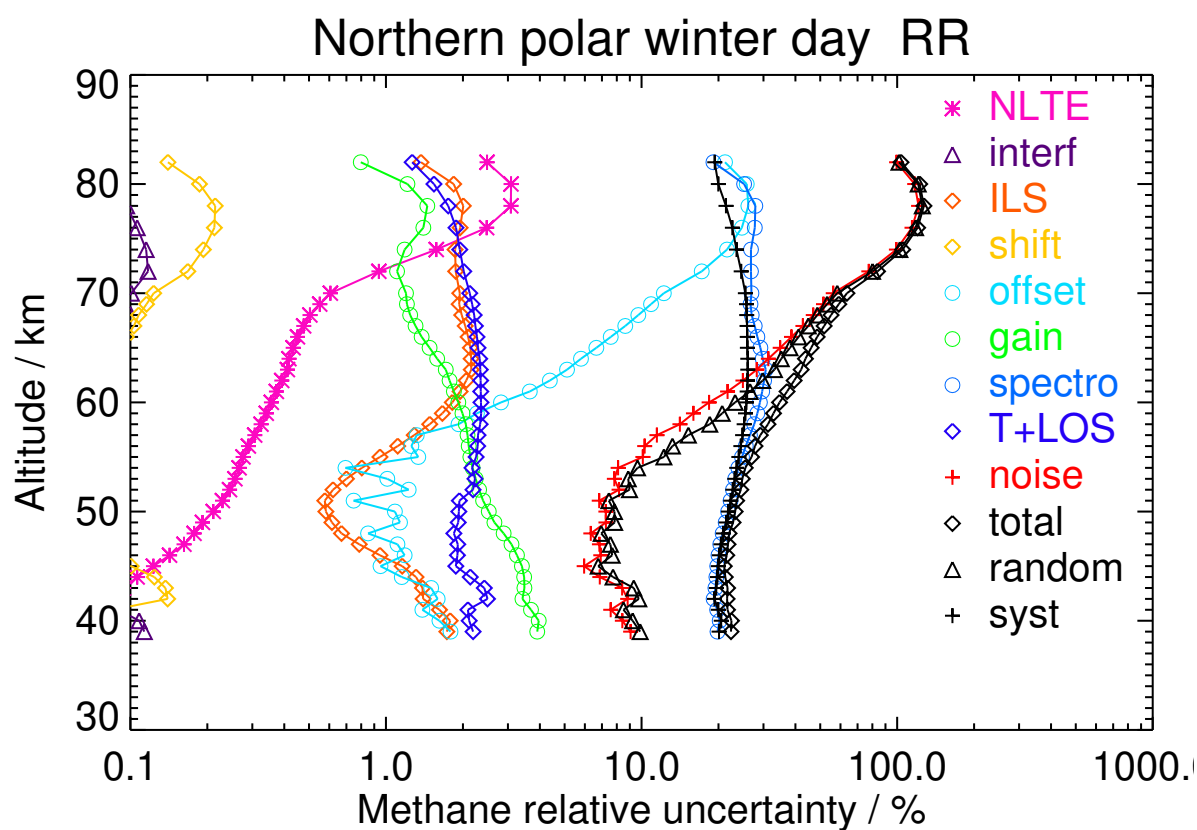

**Figure S103.** V8R\_CH4\_662 Northern polar winter day



**Table S104.** Methane error budget for Northern polar winter night. All uncertainties are  $1\sigma$ .

| altitude<br>(km) | mean target<br>(ppbv) | NLTE<br>(ppbv) | interf<br>(ppbv) | ILS<br>(ppbv) | shift<br>(ppbv) | offset<br>(ppbv) | gain<br>(ppbv) | spectro<br>(ppbv) | T+LOS<br>(ppbv) | noise<br>(ppbv) | random<br>(ppbv) | syst<br>(ppbv) | total<br>(ppbv) |
|------------------|-----------------------|----------------|------------------|---------------|-----------------|------------------|----------------|-------------------|-----------------|-----------------|------------------|----------------|-----------------|
| 45               | 137.94                | 0.13           | 0.03             | 1.95          | 0.23            | 0.89             | 4.22           | 32.06             | 1.82            | 4.76            | 6.15             | 32.22          | 32.80           |
| 50               | 137.89                | 0.17           | 0.04             | 1.22          | 0.16            | 1.02             | 2.54           | 32.84             | 1.91            | 6.35            | 7.88             | 32.70          | 33.64           |
| 55               | 118.39                | 0.28           | 0.02             | 1.45          | 0.11            | 1.37             | 2.01           | 28.54             | 2.01            | 8.28            | 9.44             | 28.39          | 29.92           |
| 60               | 81.02                 | 0.32           | 0.01             | 1.60          | 0.08            | 1.13             | 1.28           | 20.09             | 1.45            | 8.18            | 9.21             | 19.83          | 21.87           |
| 65               | 56.17                 | 0.36           | 0.04             | 1.26          | 0.08            | 1.63             | 0.75           | 14.72             | 1.14            | 11.24           | 12.33            | 14.05          | 18.69           |
| 70               | 34.23                 | 0.28           | 0.06             | 0.50          | 0.15            | 2.73             | 0.23           | 9.85              | 0.92            | 15.63           | 16.38            | 9.05           | 18.71           |
| 74               | 23.34                 | 0.28           | 0.08             | 0.39          | 0.30            | 3.74             | 0.70           | 7.59              | 0.74            | 20.94           | 21.69            | 6.40           | 22.62           |

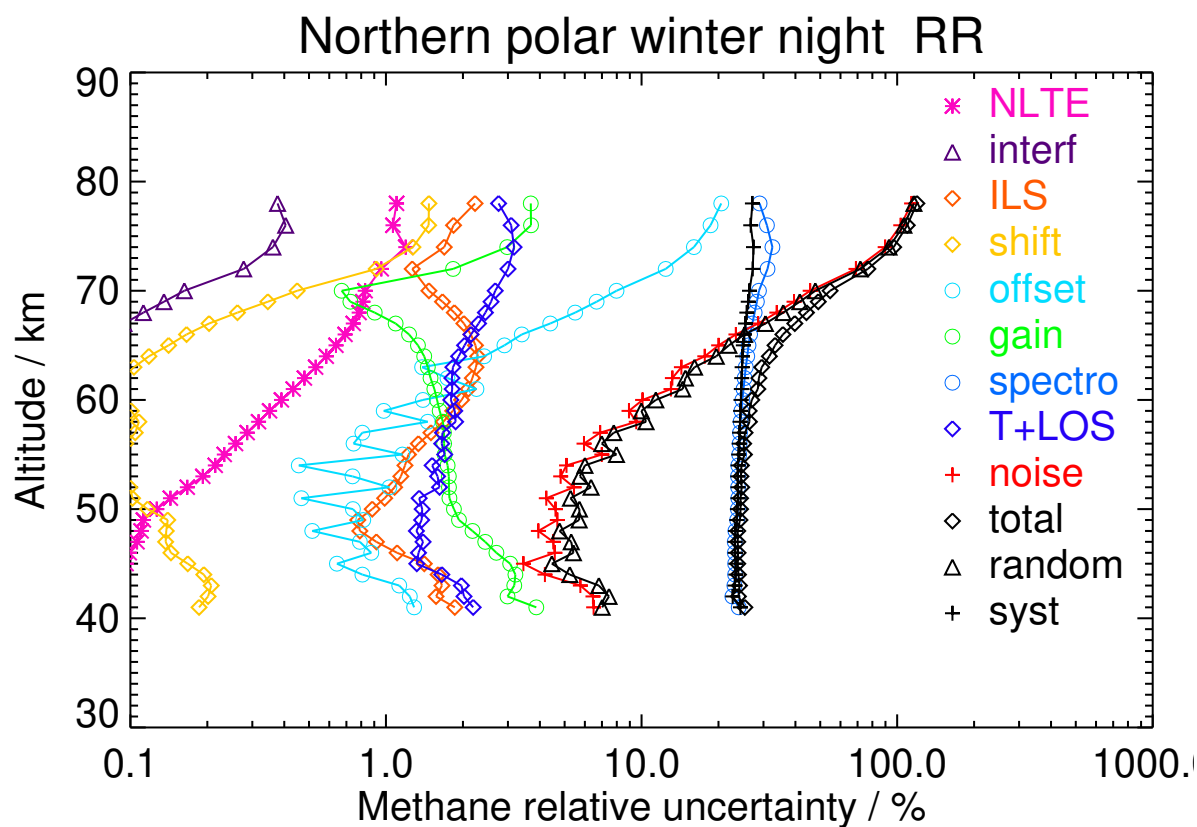

**Figure S104.** V8R\_CH4\_662 Northern polar winter night

**Table S105.** Methane error budget for Northern polar spring day. All uncertainties are  $1\sigma$ .

| altitude (km) | mean target (ppbv) | NLTE (ppbv) | interf (ppbv) | ILS (ppbv) | shift (ppbv) | offset (ppbv) | gain (ppbv) | spectro (ppbv) | T+LOS (ppbv) | noise (ppbv) | random (ppbv) | syst (ppbv) | total (ppbv) |
|---------------|--------------------|-------------|---------------|------------|--------------|---------------|-------------|----------------|--------------|--------------|---------------|-------------|--------------|
| 45            | 153.18             | 0.12        | 0.08          | 3.26       | 0.24         | 0.77          | 5.18        | 38.02          | 1.28         | 3.82         | 13.79         | 36.19       | 38.73        |
| 50            | 114.01             | 0.13        | 0.06          | 1.37       | 0.16         | 0.65          | 2.34        | 29.43          | 1.29         | 3.74         | 13.17         | 26.77       | 29.83        |
| 55            | 117.96             | 0.23        | 0.04          | 2.01       | 0.14         | 1.27          | 2.62        | 28.62          | 1.93         | 5.84         | 10.32         | 27.62       | 29.49        |
| 60            | 91.40              | 0.27        | 0.05          | 2.64       | 0.14         | 1.50          | 2.34        | 23.22          | 1.58         | 6.79         | 11.18         | 21.85       | 24.55        |
| 65            | 64.54              | 0.17        | 0.03          | 2.04       | 0.08         | 1.22          | 0.97        | 17.02          | 1.25         | 9.80         | 11.72         | 16.02       | 19.85        |
| 70            | 36.24              | 0.12        | 0.11          | 0.52       | 0.26         | 1.79          | 1.06        | 10.40          | 0.85         | 13.72        | 14.40         | 9.72        | 17.37        |
| 74            | 35.43              | 0.90        | 0.42          | 2.87       | 1.21         | 3.42          | 5.40        | 16.68          | 1.46         | 24.80        | 28.10         | 12.54       | 30.77        |
| 80            | 46.79              | 1.56        | 0.79          | 5.33       | 2.36         | 7.49          | 9.31        | 22.53          | 1.62         | 50.23        | 53.14         | 19.73       | 56.69        |
| 84            | 43.76              | 1.03        | 0.56          | 3.29       | 1.68         | 6.30          | 5.59        | 15.85          | 0.69         | 35.83        | 36.45         | 17.12       | 40.27        |

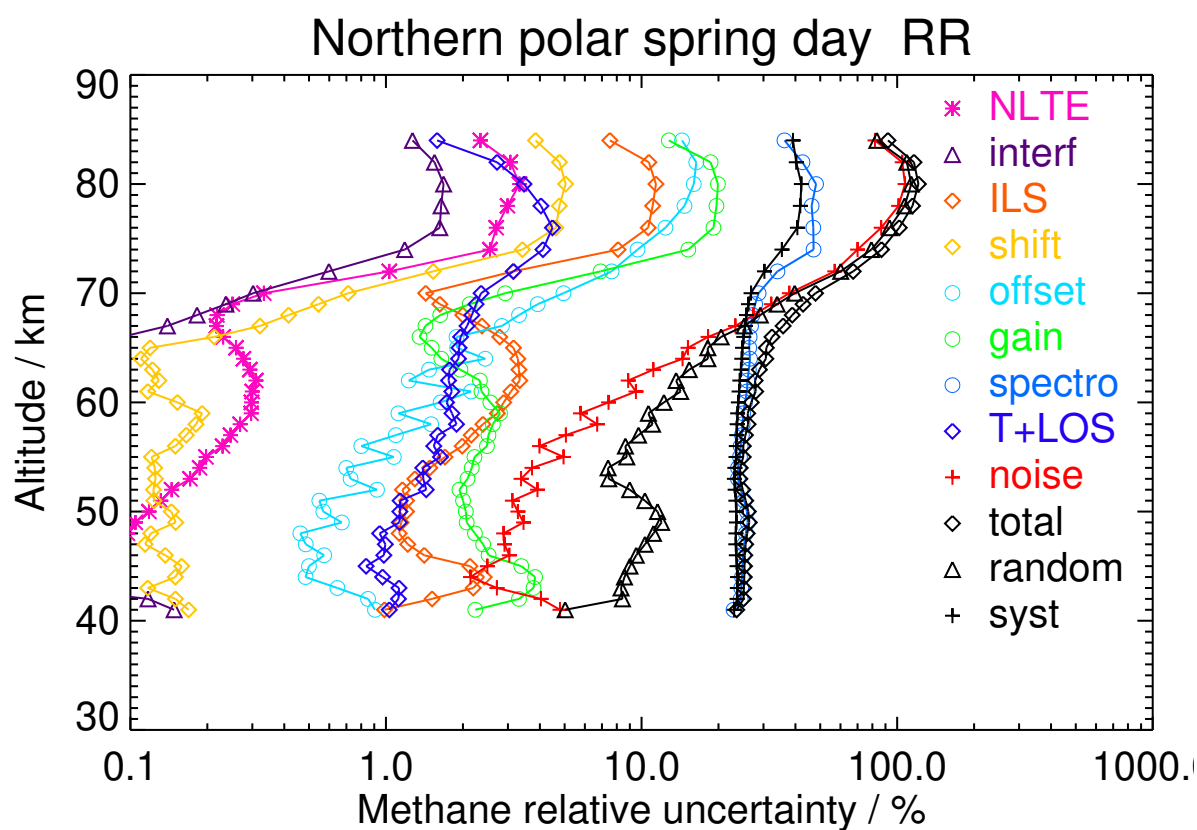

**Figure S105.** V8R\_CH4\_662 Northern polar spring day

**Table S106.** Methane error budget for Northern polar spring night. All uncertainties are  $1\sigma$ .

| altitude (km) | mean target (ppbv) | NLTE (ppbv) | interf (ppbv) | ILS (ppbv) | shift (ppbv) | offset (ppbv) | gain (ppbv) | spectro (ppbv) | T+LOS (ppbv) | noise (ppbv) | random (ppbv) | syst (ppbv) | total (ppbv) |
|---------------|--------------------|-------------|---------------|------------|--------------|---------------|-------------|----------------|--------------|--------------|---------------|-------------|--------------|
| 40            | 280.72             | 0.09        | 0.31          | 5.13       | 0.40         | 2.30          | 9.70        | 65.58          | 3.18         | 9.40         | 10.36         | 66.47       | 67.27        |
| 45            | 176.60             | 0.09        | 0.08          | 3.44       | 0.27         | 0.93          | 5.59        | 42.68          | 1.62         | 4.98         | 11.86         | 41.86       | 43.51        |
| 50            | 138.39             | 0.10        | 0.08          | 1.48       | 0.18         | 0.72          | 2.30        | 34.94          | 1.70         | 4.90         | 14.67         | 32.26       | 35.44        |
| 55            | 107.74             | 0.19        | 0.07          | 2.18       | 0.18         | 1.22          | 2.95        | 26.42          | 1.89         | 5.92         | 11.93         | 24.69       | 27.42        |
| 60            | 67.12              | 0.16        | 0.04          | 1.97       | 0.10         | 1.04          | 1.62        | 17.12          | 1.20         | 6.20         | 9.38          | 15.89       | 18.45        |
| 65            | 39.16              | 0.08        | 0.05          | 1.04       | 0.09         | 1.08          | 0.36        | 10.88          | 0.75         | 7.99         | 9.40          | 9.84        | 13.61        |
| 70            | 25.12              | 0.07        | 0.11          | 0.27       | 0.27         | 1.64          | 1.04        | 8.47           | 0.68         | 10.73        | 11.76         | 7.29        | 13.83        |
| 74            | 21.74              | 0.20        | 0.21          | 1.19       | 0.60         | 3.10          | 2.58        | 9.03           | 0.94         | 19.56        | 20.53         | 7.86        | 21.98        |
| 80            | 21.70              | 0.21        | 0.26          | 1.26       | 0.65         | 4.20          | 2.45        | 6.64           | 0.64         | 25.08        | 25.58         | 6.71        | 26.44        |

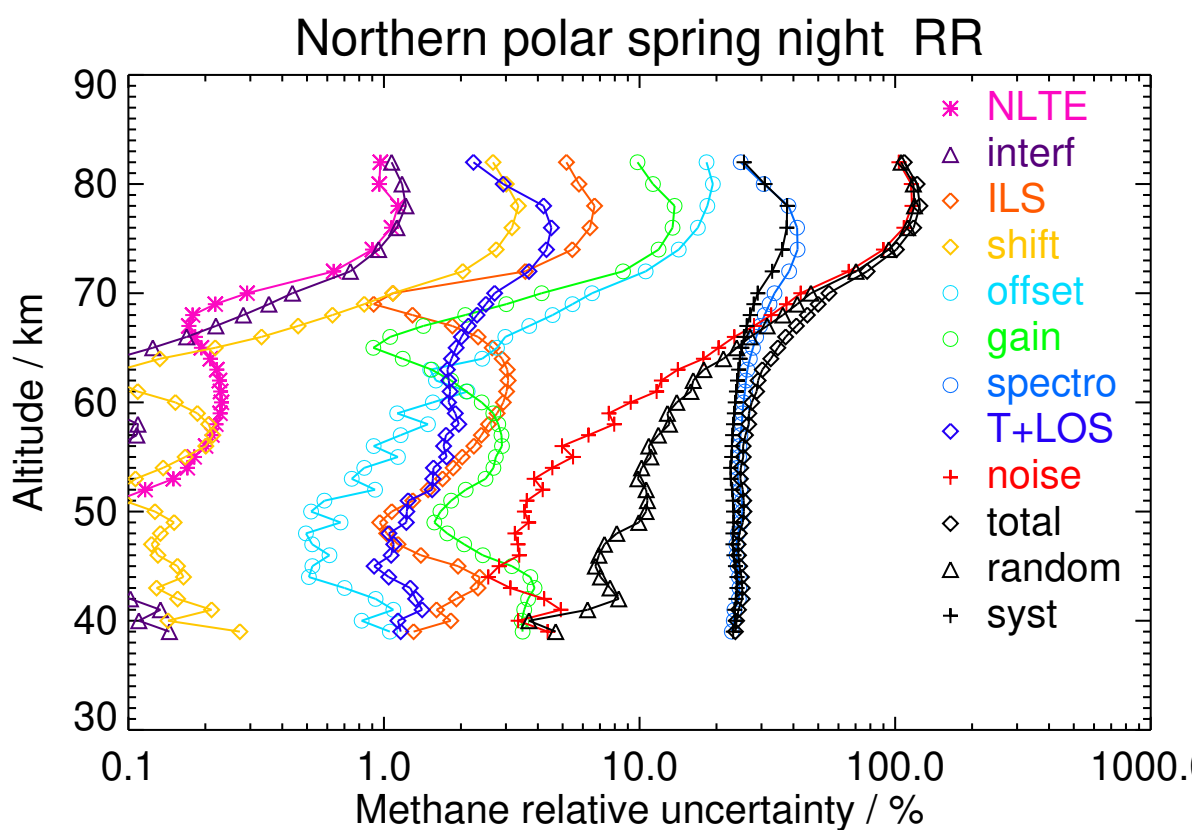

**Figure S106.** V8R\_CH4\_662 Northern polar spring night

**Table S107.** Methane error budget for Northern polar summer day. All uncertainties are  $1\sigma$ .

| altitude (km) | mean target (ppbv) | NLTE (ppbv) | interf (ppbv) | ILS (ppbv) | shift (ppbv) | offset (ppbv) | gain (ppbv) | spectro (ppbv) | T+LOS (ppbv) | noise (ppbv) | random (ppbv) | syst (ppbv) | total (ppbv) |
|---------------|--------------------|-------------|---------------|------------|--------------|---------------|-------------|----------------|--------------|--------------|---------------|-------------|--------------|
| 45            | 131.41             | 0.05        | 0.10          | 2.14       | 0.35         | 0.59          | 3.16        | 30.99          | 0.88         | 3.47         | 4.78          | 31.07       | 31.44        |
| 50            | 73.84              | 0.04        | 0.05          | 0.64       | 0.12         | 0.26          | 0.78        | 17.69          | 0.59         | 2.36         | 3.60          | 17.52       | 17.89        |
| 55            | 57.47              | 0.05        | <0.01         | 0.82       | 0.07         | 0.54          | 0.84        | 13.85          | 0.66         | 2.90         | 4.12          | 13.62       | 14.23        |
| 60            | 62.94              | 0.09        | 0.03          | 1.21       | 0.13         | 1.02          | 1.11        | 15.28          | 0.89         | 4.31         | 6.21          | 14.76       | 16.02        |
| 65            | 80.90              | 0.16        | 0.05          | 2.99       | 0.10         | 1.28          | 1.73        | 21.13          | 1.40         | 8.52         | 12.65         | 19.35       | 23.12        |
| 70            | 79.15              | 0.21        | 0.12          | 1.33       | 0.22         | 2.97          | 0.98        | 21.90          | 1.72         | 21.87        | 24.28         | 19.57       | 31.18        |
| 74            | 63.17              | 0.87        | 0.61          | 4.02       | 1.15         | 2.55          | 4.28        | 21.70          | 0.94         | 32.93        | 34.44         | 20.32       | 39.99        |
| 80            | 71.77              | 2.60        | 0.93          | 5.08       | 2.73         | 7.71          | 6.40        | 25.07          | 0.59         | 55.52        | 57.28         | 23.91       | 62.07        |
| 84            | 65.99              | 3.98        | 1.01          | 4.67       | 3.53         | 8.70          | 7.10        | 24.54          | 0.76         | 61.19        | 63.93         | 20.89       | 67.26        |

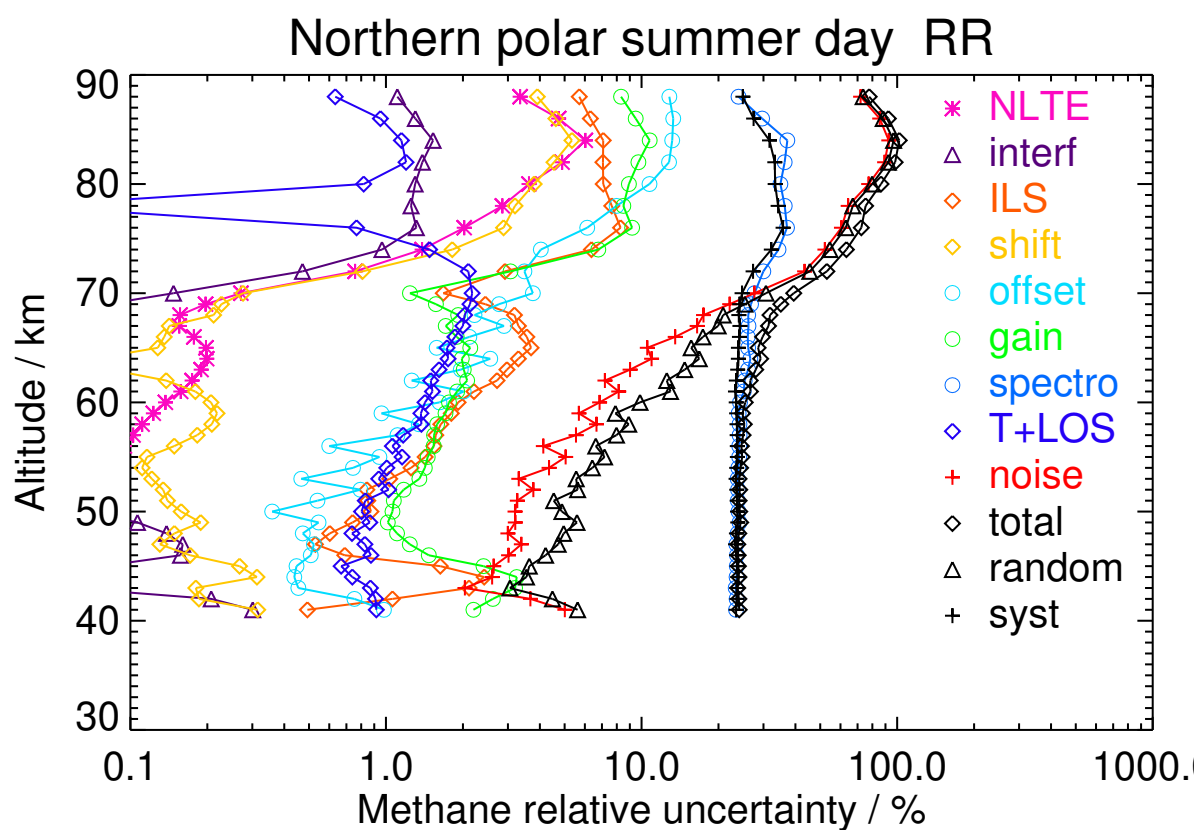

**Figure S107.** V8R\_CH4\_662 Northern polar summer day

**Table S108.** Methane error budget for Northern polar summer night. All uncertainties are  $1\sigma$ .

| altitude (km) | mean target (ppbv) | NLTE (ppbv) | interf (ppbv) | ILS (ppbv) | shift (ppbv) | offset (ppbv) | gain (ppbv) | spectro (ppbv) | T+LOS (ppbv) | noise (ppbv) | random (ppbv) | syst (ppbv) | total (ppbv) |
|---------------|--------------------|-------------|---------------|------------|--------------|---------------|-------------|----------------|--------------|--------------|---------------|-------------|--------------|
| 45            | 113.53             | 0.04        | 0.04          | 2.51       | 0.26         | 0.58          | 3.45        | 26.93          | 0.86         | 3.18         | 7.11          | 26.53       | 27.47        |
| 50            | 65.20              | 0.03        | 0.02          | 0.70       | 0.08         | 0.34          | 0.94        | 15.41          | 0.63         | 2.58         | 4.18          | 15.12       | 15.69        |
| 55            | 113.35             | 0.11        | 0.02          | 1.41       | 0.18         | 1.32          | 2.13        | 28.99          | 1.94         | 5.82         | 16.29         | 24.92       | 29.77        |
| 60            | 148.25             | 0.20        | 0.07          | 3.61       | 0.18         | 2.27          | 2.99        | 34.75          | 3.16         | 8.80         | 15.91         | 32.70       | 36.36        |
| 65            | 151.21             | 0.18        | 0.08          | 5.55       | 0.19         | 2.76          | 2.95        | 35.72          | 3.97         | 15.97        | 19.33         | 34.93       | 39.92        |
| 70            | 123.16             | 0.53        | 0.21          | 1.19       | 0.40         | 4.55          | 1.22        | 33.86          | 4.44         | 35.67        | 37.82         | 32.13       | 49.63        |
| 74            | 85.46              | 1.43        | 0.79          | 4.85       | 1.75         | 5.37          | 6.40        | 35.08          | 3.05         | 50.11        | 52.21         | 33.53       | 62.05        |
| 80            | 57.87              | 1.91        | 0.89          | 5.38       | 2.47         | 8.15          | 7.73        | 28.00          | 0.56         | 60.83        | 62.76         | 26.66       | 68.19        |
| 84            | 58.10              | 1.78        | 0.73          | 4.50       | 2.14         | 8.29          | 6.44        | 20.94          | 0.03         | 54.74        | 55.81         | 21.42       | 59.78        |

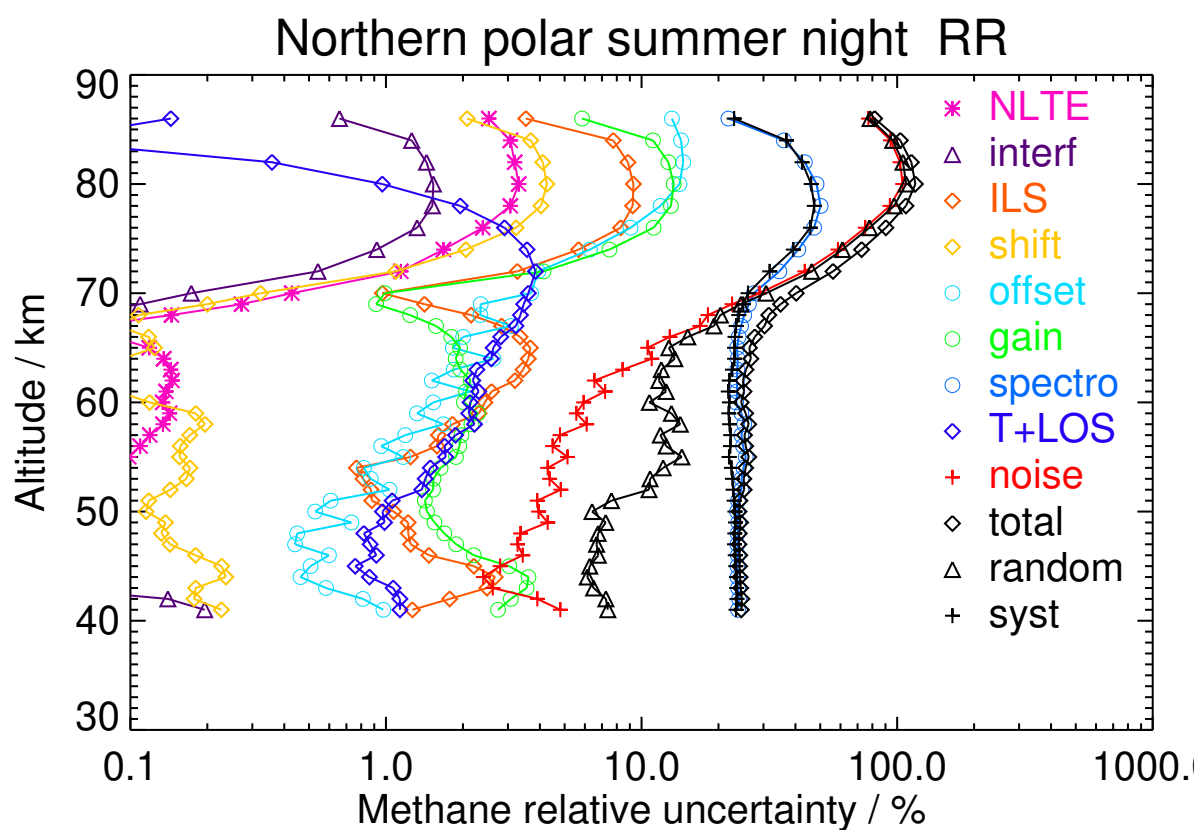

**Figure S108.** V8R\_CH4\_662 Northern polar summer night

**Table S109.** Methane error budget for Northern polar autumn day. All uncertainties are  $1\sigma$ .

| altitude<br>(km) | mean target<br>(ppbv) | NLTE<br>(ppbv) | interf<br>(ppbv) | ILS<br>(ppbv) | shift<br>(ppbv) | offset<br>(ppbv) | gain<br>(ppbv) | spectro<br>(ppbv) | T+LOS<br>(ppbv) | noise<br>(ppbv) | random<br>(ppbv) | syst<br>(ppbv) | total<br>(ppbv) |
|------------------|-----------------------|----------------|------------------|---------------|-----------------|------------------|----------------|-------------------|-----------------|-----------------|------------------|----------------|-----------------|
| 45               | 79.49                 | 0.07           | 0.03             | 0.66          | 0.12            | 0.63             | 2.24           | 18.85             | 1.17            | 3.97            | 7.16             | 18.08          | 19.45           |
| 50               | 147.46                | 0.23           | 0.03             | 0.92          | 0.15            | 1.46             | 3.21           | 34.85             | 2.40            | 7.90            | 12.33            | 33.82          | 36.00           |
| 55               | 184.61                | 0.48           | 0.03             | 2.03          | 0.15            | 2.22             | 3.85           | 43.11             | 3.85            | 11.17           | 13.41            | 42.93          | 44.97           |
| 60               | 171.05                | 0.64           | 0.03             | 3.70          | 0.10            | 2.59             | 3.35           | 41.73             | 3.60            | 12.51           | 16.55            | 40.85          | 44.08           |
| 65               | 114.47                | 0.52           | 0.04             | 3.21          | 0.07            | 2.19             | 1.84           | 30.47             | 2.86            | 16.32           | 20.16            | 28.56          | 34.96           |
| 70               | 54.94                 | 0.20           | 0.09             | 0.88          | 0.22            | 2.91             | 0.44           | 16.88             | 1.71            | 20.49           | 22.26            | 14.90          | 26.78           |
| 74               | 32.33                 | 0.27           | 0.15             | 0.58          | 0.41            | 4.31             | 1.54           | 10.96             | 1.27            | 28.07           | 28.96            | 9.64           | 30.52           |
| 80               | 31.07                 | 0.25           | 0.15             | 0.71          | 0.48            | 6.53             | 1.93           | 10.78             | 1.02            | 38.34           | 39.50            | 8.61           | 40.43           |

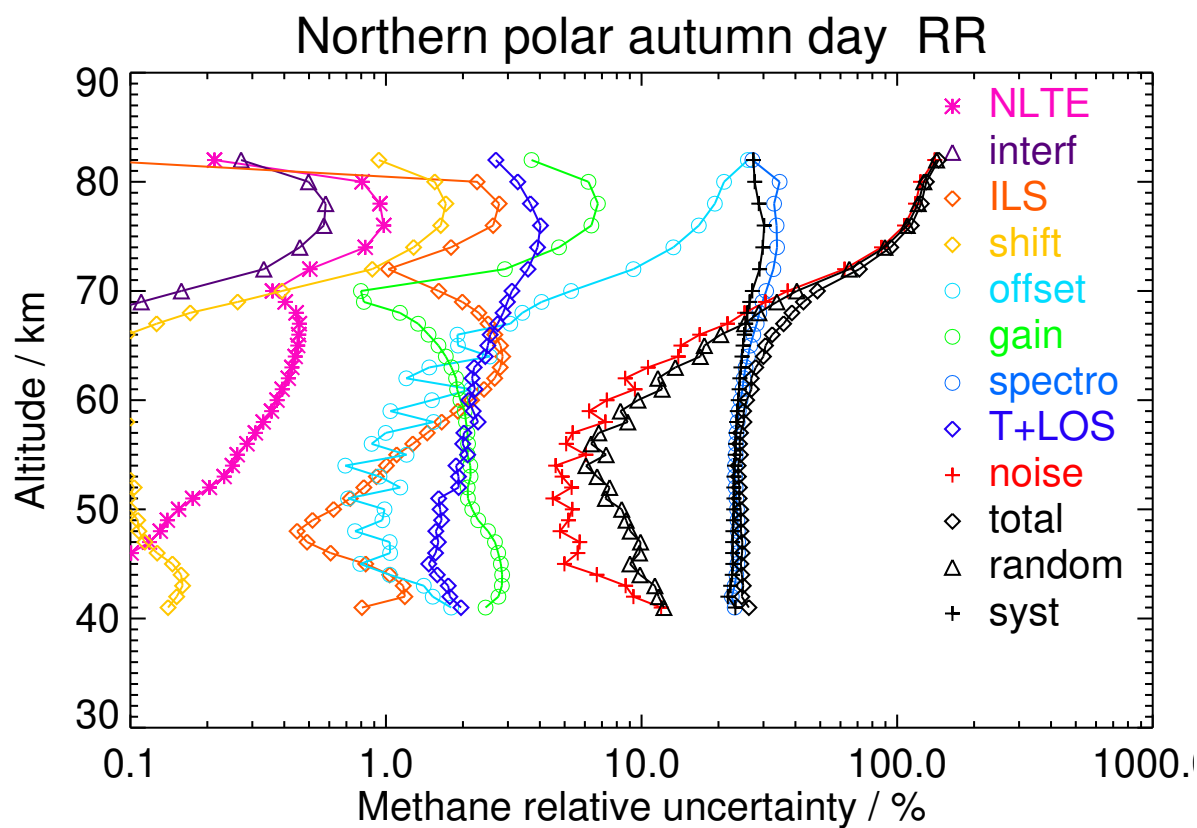

**Figure S109.** V8R\_CH4\_662 Northern polar autumn day

**Table S110.** Methane error budget for Northern polar autumn night. All uncertainties are  $1\sigma$ .

| altitude (km) | mean target (ppbv) | NLTE (ppbv) | interf (ppbv) | ILS (ppbv) | shift (ppbv) | offset (ppbv) | gain (ppbv) | spectro (ppbv) | T+LOS (ppbv) | noise (ppbv) | random (ppbv) | syst (ppbv) | total (ppbv) |
|---------------|--------------------|-------------|---------------|------------|--------------|---------------|-------------|----------------|--------------|--------------|---------------|-------------|--------------|
| 45            | 156.82             | 0.11        | 0.04          | 1.60       | 0.28         | 1.32          | 4.93        | 36.71          | 2.85         | 7.17         | 10.30         | 36.46       | 37.89        |
| 50            | 195.53             | 0.23        | 0.05          | 1.79       | 0.22         | 1.75          | 4.39        | 45.34          | 3.52         | 10.22        | 12.70         | 45.13       | 46.88        |
| 55            | 133.84             | 0.26        | 0.02          | 1.71       | 0.14         | 1.46          | 2.42        | 33.20          | 2.58         | 8.99         | 13.15         | 32.06       | 34.65        |
| 60            | 87.90              | 0.29        | <0.01         | 1.64       | 0.09         | 1.07          | 1.45        | 22.33          | 1.61         | 8.16         | 10.47         | 21.55       | 23.96        |
| 65            | 58.09              | 0.32        | 0.04          | 1.25       | 0.05         | 1.49          | 0.85        | 15.35          | 1.14         | 10.92        | 12.23         | 14.54       | 19.00        |
| 70            | 39.59              | 0.33        | 0.04          | 0.75       | 0.10         | 2.23          | 0.53        | 11.31          | 1.02         | 15.02        | 16.07         | 10.12       | 18.99        |
| 74            | 44.61              | 0.59        | 0.13          | 0.48       | 0.43         | 5.30          | 1.56        | 16.94          | 2.11         | 34.18        | 36.58         | 12.37       | 38.61        |
| 80            | 47.95              | 0.66        | 0.33          | 0.23       | 1.16         | 8.66          | 4.91        | 20.07          | 2.64         | 52.52        | 55.40         | 14.16       | 57.18        |

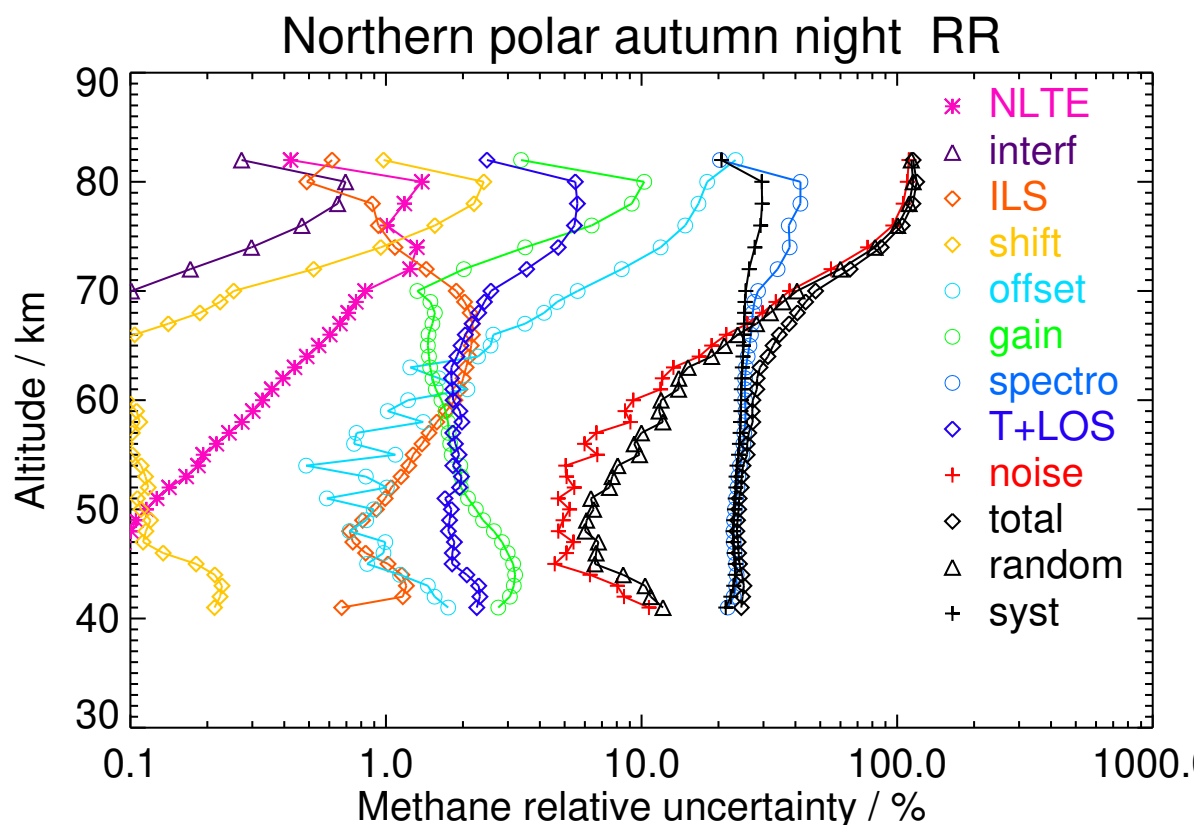

**Figure S110.** V8R\_CH4\_662 Northern polar autumn night



**Table S111.** Methane error budget for Northern midlatitude winter day. All uncertainties are  $1\sigma$ .

| altitude (km) | mean target (ppbv) | NLTE (ppbv) | interf (ppbv) | ILS (ppbv) | shift (ppbv) | offset (ppbv) | gain (ppbv) | spectro (ppbv) | T+LOS (ppbv) | noise (ppbv) | random (ppbv) | syst (ppbv) | total (ppbv) |
|---------------|--------------------|-------------|---------------|------------|--------------|---------------|-------------|----------------|--------------|--------------|---------------|-------------|--------------|
| 40            | 419.76             | 0.29        | 0.94          | 5.73       | 0.48         | 4.51          | 14.22       | 90.72          | 5.62         | 18.52        | 25.99         | 90.48       | 94.14        |
| 45            | 272.34             | 0.27        | 0.31          | 4.17       | 0.34         | 1.56          | 8.35        | 62.88          | 2.83         | 8.51         | 18.32         | 61.55       | 64.22        |
| 50            | 171.34             | 0.26        | 0.10          | 1.83       | 0.16         | 1.21          | 3.56        | 39.27          | 2.52         | 6.79         | 9.87          | 38.92       | 40.15        |
| 55            | 148.16             | 0.39        | 0.09          | 2.30       | 0.17         | 1.95          | 3.89        | 34.45          | 2.97         | 9.03         | 11.24         | 34.28       | 36.08        |
| 60            | 118.86             | 0.38        | 0.07          | 2.95       | 0.13         | 1.99          | 3.07        | 29.12          | 2.56         | 9.95         | 13.24         | 28.29       | 31.24        |
| 65            | 62.82              | 0.14        | 0.05          | 1.84       | 0.13         | 1.75          | 0.79        | 18.07          | 1.56         | 11.69        | 14.92         | 15.82       | 21.75        |
| 70            | 30.23              | 0.12        | 0.08          | 0.62       | 0.20         | 2.05          | 0.88        | 9.29           | 0.91         | 12.69        | 13.73         | 8.08        | 15.93        |
| 74            | 22.17              | 0.28        | 0.15          | 0.76       | 0.37         | 3.47          | 2.23        | 7.31           | 0.96         | 20.81        | 21.51         | 6.51        | 22.48        |
| 80            | 24.90              | 0.65        | 0.28          | 1.95       | 0.61         | 5.00          | 5.15        | 11.16          | 1.41         | 29.26        | 30.93         | 9.07        | 32.24        |

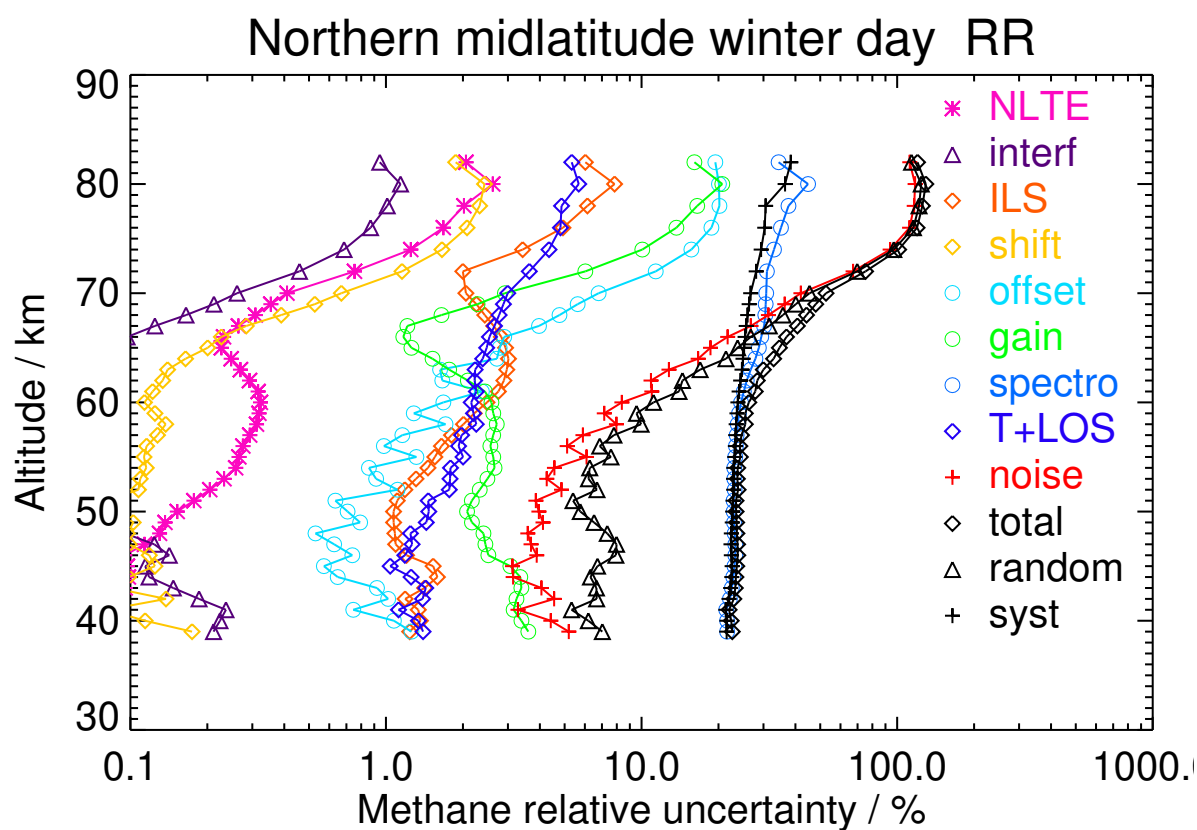

**Figure S111.** V8R\_CH4\_662 Northern midlatitude winter day

**Table S112.** Methane error budget for Northern midlatitude winter night. All uncertainties are  $1\sigma$ .

| altitude (km) | mean target (ppbv) | NLTE (ppbv) | interf (ppbv) | ILS (ppbv) | shift (ppbv) | offset (ppbv) | gain (ppbv) | spectro (ppbv) | T+LOS (ppbv) | noise (ppbv) | random (ppbv) | syst (ppbv) | total (ppbv) |
|---------------|--------------------|-------------|---------------|------------|--------------|---------------|-------------|----------------|--------------|--------------|---------------|-------------|--------------|
| 40            | 373.77             | 0.25        | 0.70          | 6.94       | 0.53         | 5.57          | 19.56       | 94.52          | 6.77         | 21.65        | 28.26         | 95.46       | 99.56        |
| 45            | 270.81             | 0.17        | 0.18          | 4.64       | 0.26         | 2.36          | 12.49       | 69.71          | 4.00         | 10.86        | 26.70         | 66.81       | 71.95        |
| 50            | 176.91             | 0.18        | 0.09          | 2.36       | 0.18         | 1.74          | 5.77        | 42.77          | 3.16         | 8.76         | 15.23         | 41.54       | 44.24        |
| 55            | 162.83             | 0.27        | 0.07          | 2.17       | 0.13         | 2.14          | 4.34        | 37.63          | 3.80         | 11.30        | 13.21         | 37.57       | 39.82        |
| 60            | 135.06             | 0.28        | 0.05          | 2.66       | 0.13         | 2.11          | 2.66        | 32.69          | 3.35         | 12.87        | 14.73         | 32.36       | 35.56        |
| 65            | 86.57              | 0.28        | 0.05          | 2.24       | 0.11         | 2.15          | 1.22        | 22.58          | 2.41         | 16.00        | 17.71         | 21.66       | 27.98        |
| 70            | 47.16              | 0.25        | 0.08          | 0.92       | 0.17         | 2.96          | 0.95        | 13.35          | 1.61         | 18.92        | 20.02         | 12.20       | 23.44        |
| 74            | 34.04              | 0.30        | 0.12          | 0.52       | 0.34         | 4.78          | 1.72        | 11.64          | 1.56         | 28.71        | 30.07         | 9.20        | 31.44        |
| 80            | 28.80              | 0.70        | 0.04          | 0.71       | 0.16         | 6.20          | 0.87        | 7.81           | 0.77         | 33.81        | 34.71         | 6.30        | 35.28        |

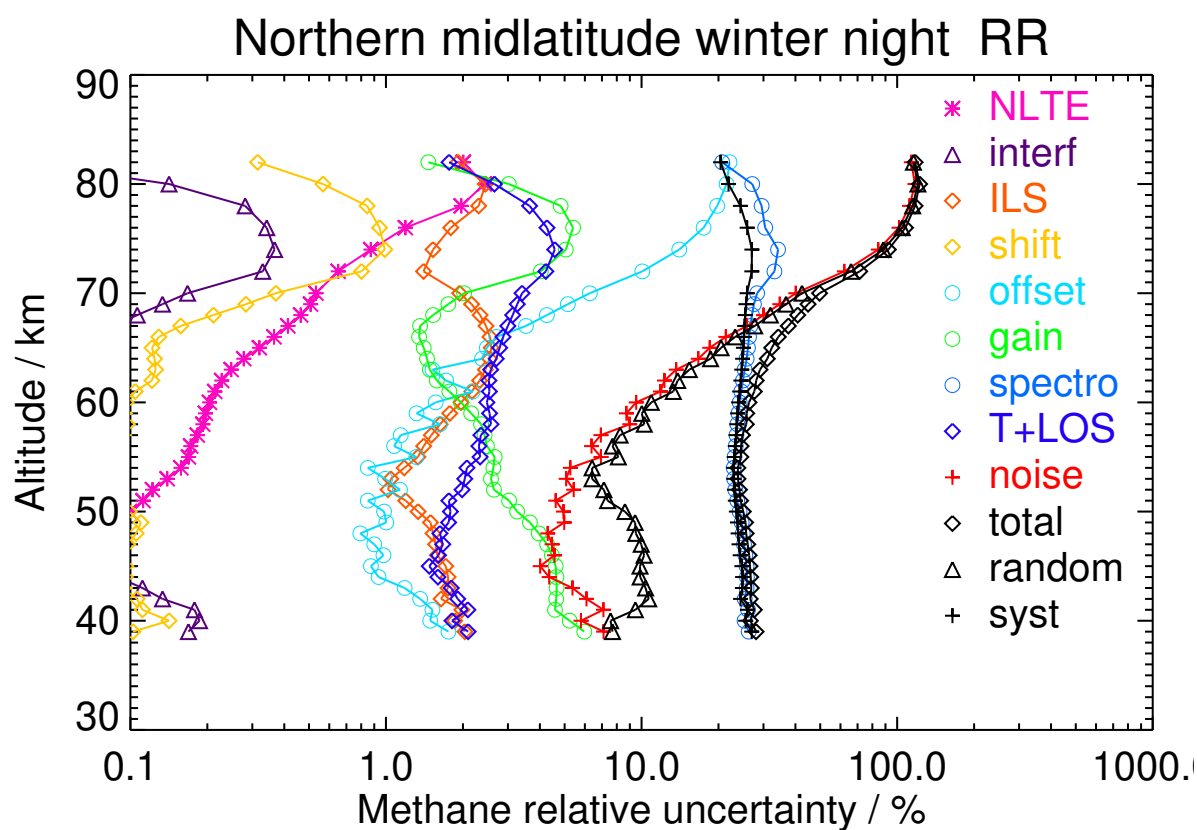

**Figure S112.** V8R\_CH4\_662 Northern midlatitude winter night

**Table S113.** Methane error budget for Northern midlatitude spring day. All uncertainties are  $1\sigma$ .

| altitude (km) | mean target (ppbv) | NLTE (ppbv) | interf (ppbv) | ILS (ppbv) | shift (ppbv) | offset (ppbv) | gain (ppbv) | spectro (ppbv) | T+LOS (ppbv) | noise (ppbv) | random (ppbv) | syst (ppbv) | total (ppbv) |
|---------------|--------------------|-------------|---------------|------------|--------------|---------------|-------------|----------------|--------------|--------------|---------------|-------------|--------------|
| 45            | 243.88             | 0.30        | 0.23          | 4.75       | 0.32         | 1.58          | 9.93        | 63.36          | 2.48         | 6.60         | 29.41         | 57.65       | 64.72        |
| 50            | 192.97             | 0.37        | 0.16          | 3.03       | 0.26         | 1.61          | 6.35        | 47.99          | 2.98         | 6.68         | 21.19         | 44.27       | 49.08        |
| 55            | 161.77             | 0.45        | 0.12          | 3.50       | 0.29         | 2.11          | 5.46        | 38.10          | 3.43         | 8.05         | 14.88         | 36.79       | 39.69        |
| 60            | 113.58             | 0.35        | 0.07          | 3.31       | 0.18         | 2.07          | 3.28        | 27.75          | 2.36         | 8.87         | 12.68         | 26.83       | 29.68        |
| 65            | 66.72              | 0.14        | 0.03          | 2.03       | 0.07         | 1.25          | 1.00        | 17.53          | 1.40         | 10.47        | 12.23         | 16.61       | 20.63        |
| 70            | 39.13              | 0.24        | 0.11          | 0.55       | 0.27         | 1.85          | 1.47        | 11.74          | 1.10         | 14.58        | 15.61         | 10.68       | 18.91        |
| 74            | 39.67              | 1.12        | 0.33          | 2.42       | 0.89         | 3.93          | 5.56        | 16.96          | 2.10         | 28.06        | 30.82         | 13.57       | 33.67        |
| 80            | 58.34              | 4.21        | 1.22          | 9.01       | 3.91         | 9.37          | 19.31       | 36.79          | 3.47         | 59.36        | 69.03         | 26.45       | 73.93        |

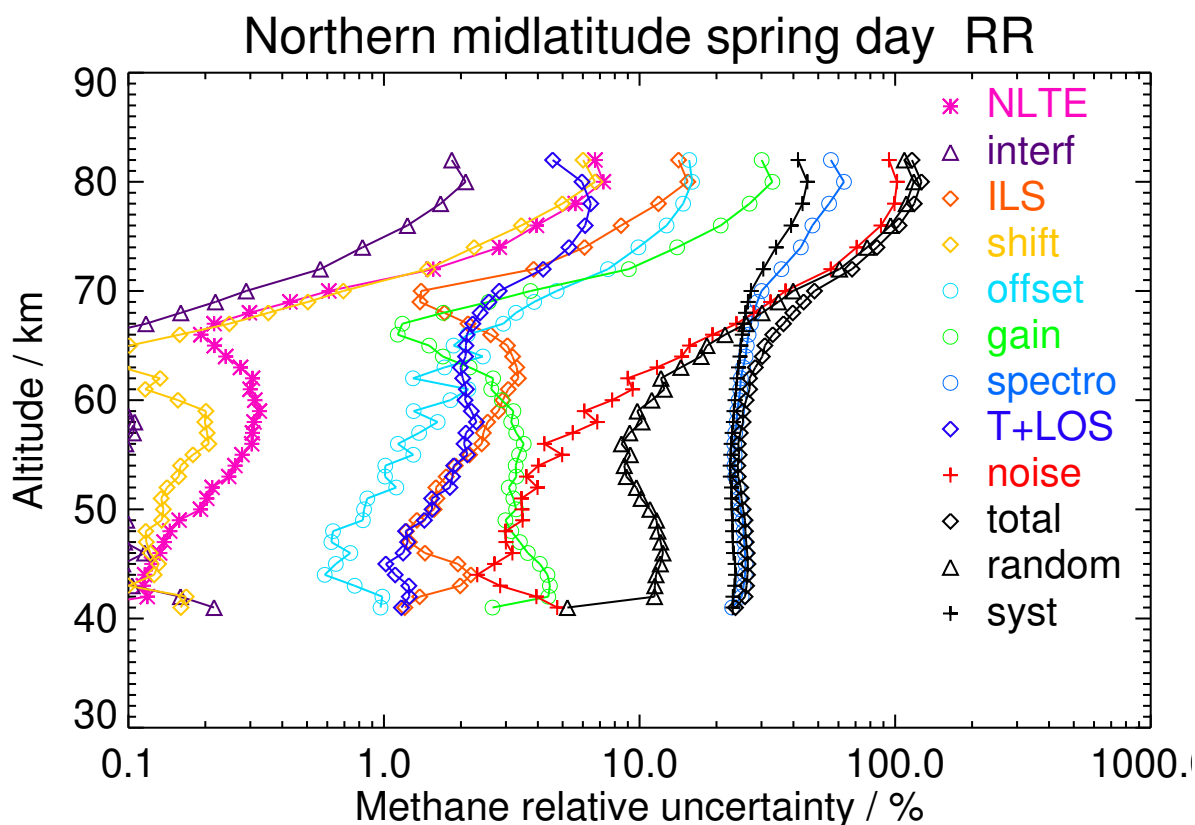

**Figure S113.** V8R\_CH4\_662 Northern midlatitude spring day

**Table S114.** Methane error budget for Northern midlatitude spring night. All uncertainties are  $1\sigma$ .

| altitude (km) | mean target (ppbv) | NLTE (ppbv) | interf (ppbv) | ILS (ppbv) | shift (ppbv) | offset (ppbv) | gain (ppbv) | spectro (ppbv) | T+LOS (ppbv) | noise (ppbv) | random (ppbv) | syst (ppbv) | total (ppbv) |
|---------------|--------------------|-------------|---------------|------------|--------------|---------------|-------------|----------------|--------------|--------------|---------------|-------------|--------------|
| 45            | 273.44             | 0.11        | 0.28          | 4.18       | 0.30         | 1.45          | 8.84        | 65.15          | 2.52         | 6.91         | 24.48         | 61.62       | 66.30        |
| 50            | 238.15             | 0.18        | 0.16          | 2.54       | 0.20         | 1.56          | 5.77        | 55.34          | 3.50         | 7.25         | 19.55         | 52.79       | 56.30        |
| 55            | 199.23             | 0.34        | 0.20          | 4.78       | 0.45         | 2.80          | 8.12        | 44.46          | 4.92         | 9.58         | 17.03         | 43.59       | 46.80        |
| 60            | 141.27             | 0.23        | 0.10          | 4.02       | 0.24         | 2.40          | 4.21        | 32.71          | 3.28         | 9.85         | 13.50         | 32.18       | 34.90        |
| 65            | 85.77              | 0.09        | 0.06          | 2.36       | 0.16         | 1.81          | 0.98        | 22.41          | 2.18         | 13.04        | 14.98         | 21.50       | 26.21        |
| 70            | 38.42              | 0.29        | 0.19          | 0.75       | 0.53         | 2.20          | 2.78        | 13.18          | 1.78         | 15.91        | 16.85         | 12.63       | 21.06        |
| 74            | 22.22              | 0.41        | 0.26          | 1.75       | 0.77         | 3.01          | 4.21        | 10.22          | 1.77         | 19.86        | 20.80         | 10.01       | 23.08        |
| 80            | 22.84              | 0.49        | 0.28          | 2.03       | 0.85         | 4.23          | 4.79        | 9.35           | 1.47         | 25.79        | 26.43         | 10.10       | 28.29        |

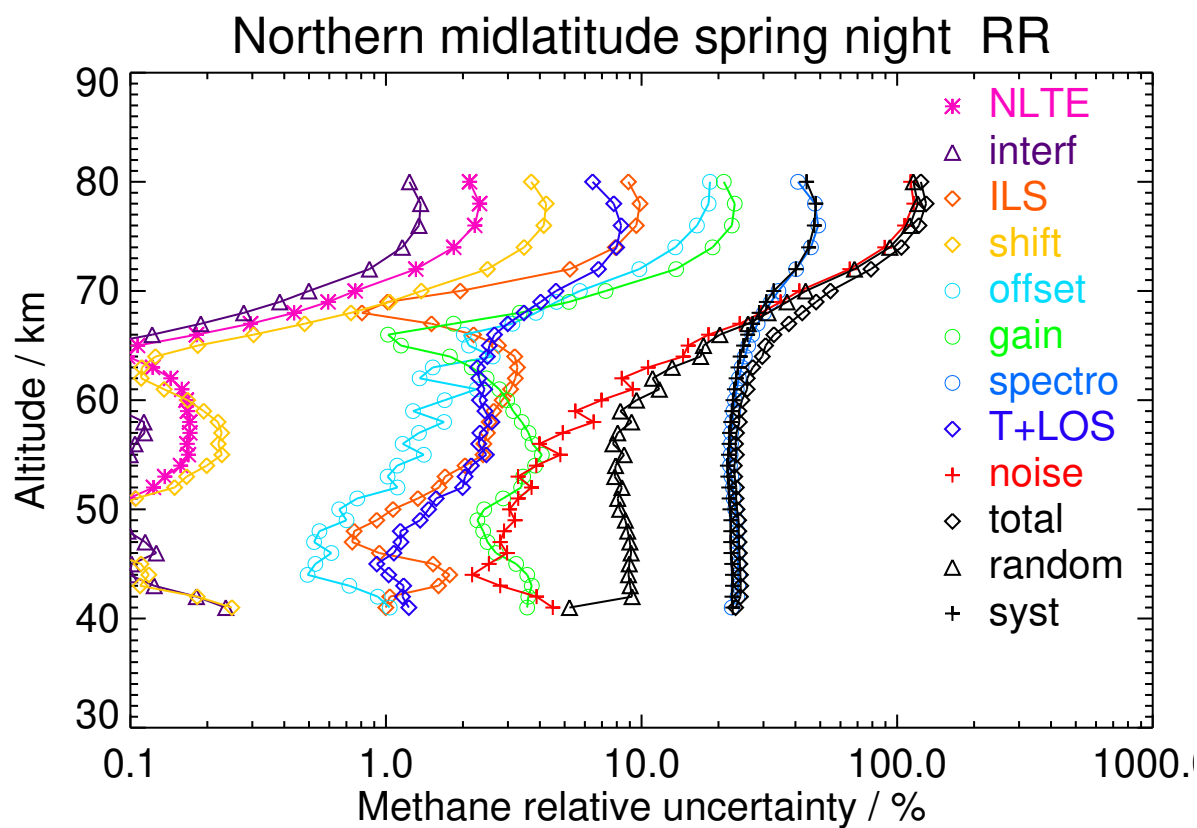

**Figure S114.** V8R\_CH4\_662 Northern midlatitude spring night

**Table S115.** Methane error budget for Northern midlatitude summer day. All uncertainties are  $1\sigma$ .

| altitude (km) | mean target (ppbv) | NLTE (ppbv) | interf (ppbv) | ILS (ppbv) | shift (ppbv) | offset (ppbv) | gain (ppbv) | spectro (ppbv) | T+LOS (ppbv) | noise (ppbv) | random (ppbv) | syst (ppbv) | total (ppbv) |
|---------------|--------------------|-------------|---------------|------------|--------------|---------------|-------------|----------------|--------------|--------------|---------------|-------------|--------------|
| 45            | 225.10             | 0.19        | 0.20          | 3.79       | 0.37         | 1.24          | 7.94        | 56.65          | 1.99         | 5.77         | 20.15         | 54.03       | 57.67        |
| 50            | 152.91             | 0.17        | 0.14          | 1.50       | 0.22         | 0.88          | 3.12        | 39.14          | 1.87         | 5.25         | 17.58         | 35.59       | 39.69        |
| 55            | 204.97             | 0.44        | 0.07          | 3.50       | 0.42         | 2.71          | 6.21        | 53.56          | 4.47         | 9.43         | 30.14         | 46.13       | 55.10        |
| 60            | 171.52             | 0.51        | 0.10          | 4.62       | 0.23         | 3.47          | 4.99        | 42.15          | 4.23         | 11.35        | 19.60         | 39.97       | 44.52        |
| 65            | 182.12             | 0.49        | 0.08          | 5.40       | 0.19         | 3.89          | 3.98        | 44.55          | 5.16         | 19.68        | 24.90         | 42.89       | 49.59        |
| 70            | 122.46             | 0.64        | 0.18          | 1.54       | 0.50         | 4.51          | 2.01        | 32.20          | 3.78         | 34.86        | 36.78         | 30.68       | 47.90        |
| 74            | 89.54              | 1.88        | 0.38          | 2.33       | 1.13         | 5.54          | 4.91        | 27.68          | 2.35         | 52.07        | 53.56         | 26.06       | 59.57        |
| 80            | 80.69              | 9.01        | 0.97          | 5.47       | 3.69         | 9.85          | 12.90       | 41.35          | 0.51         | 71.39        | 79.49         | 29.59       | 84.82        |
| 84            | 267.44             | 53.86       | 1.65          | 7.40       | 7.69         | 31.95         | 20.89       | 128.25         | 1.19         | 205.00       | 236.93        | 82.54       | 250.89       |

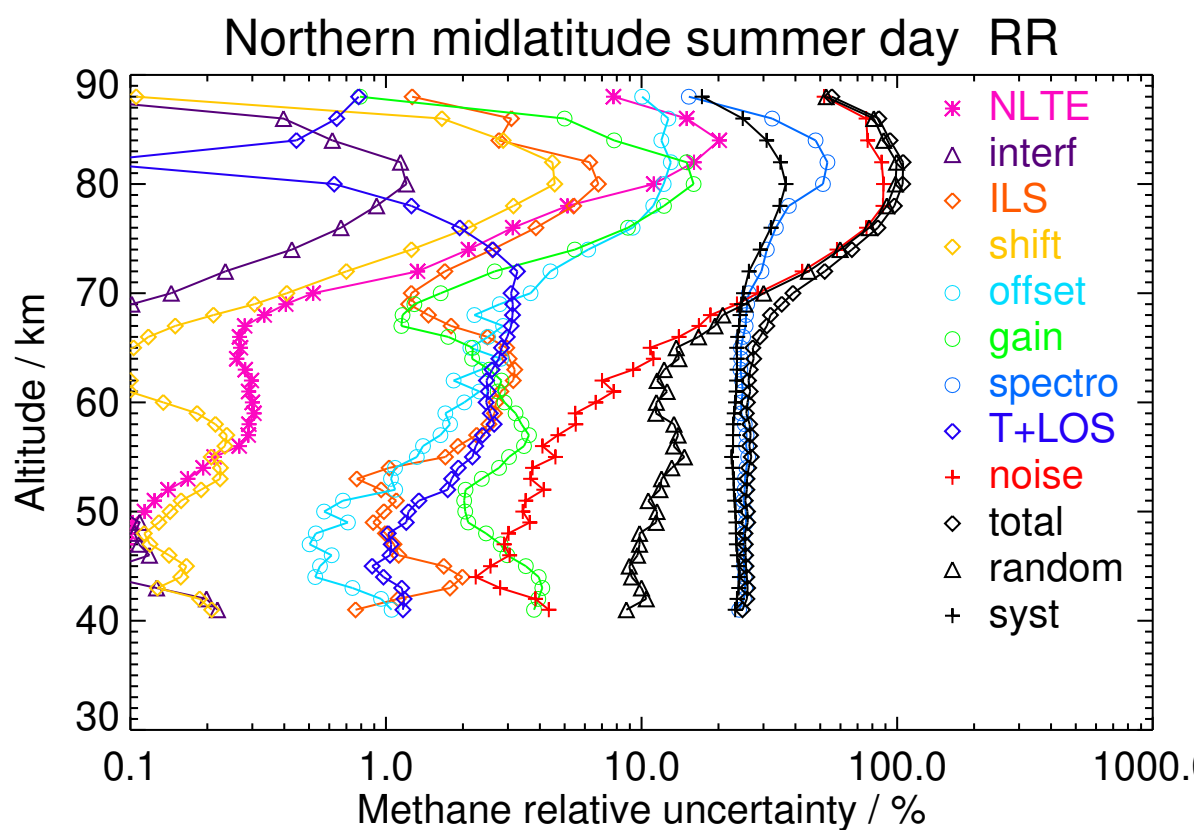

**Figure S115.** V8R\_CH4\_662 Northern midlatitude summer day

**Table S116.** Methane error budget for Northern midlatitude summer night. All uncertainties are  $1\sigma$ .

| altitude (km) | mean target (ppbv) | NLTE (ppbv) | interf (ppbv) | ILS (ppbv) | shift (ppbv) | offset (ppbv) | gain (ppbv) | spectro (ppbv) | T+LOS (ppbv) | noise (ppbv) | random (ppbv) | syst (ppbv) | total (ppbv) |
|---------------|--------------------|-------------|---------------|------------|--------------|---------------|-------------|----------------|--------------|--------------|---------------|-------------|--------------|
| 45            | 210.43             | 0.08        | 0.23          | 2.86       | 0.24         | 1.20          | 6.50        | 50.81          | 1.84         | 5.45         | 20.28         | 47.49       | 51.64        |
| 50            | 187.37             | 0.13        | 0.15          | 1.88       | 0.25         | 1.23          | 4.74        | 48.56          | 2.56         | 6.36         | 26.23         | 41.76       | 49.32        |
| 55            | 229.78             | 0.22        | 0.14          | 4.27       | 0.52         | 3.15          | 7.72        | 56.86          | 5.39         | 10.89        | 32.76         | 48.95       | 58.90        |
| 60            | 267.65             | 0.22        | 0.15          | 7.58       | 0.33         | 5.26          | 7.85        | 59.97          | 7.69         | 16.66        | 27.58         | 57.61       | 63.87        |
| 65            | 177.66             | 0.34        | 0.07          | 5.78       | 0.19         | 3.70          | 3.80        | 43.37          | 6.04         | 20.95        | 26.86         | 41.19       | 49.18        |
| 70            | 166.03             | 1.39        | 0.36          | 2.42       | 1.00         | 5.56          | 4.35        | 48.12          | 7.48         | 47.20        | 50.73         | 45.65       | 68.25        |
| 74            | 101.77             | 2.32        | 0.61          | 4.15       | 1.91         | 6.56          | 7.33        | 38.45          | 4.43         | 61.30        | 63.71         | 36.33       | 73.34        |
| 80            | 69.70              | 2.61        | 0.42          | 2.43       | 1.83         | 10.91         | 5.29        | 25.74          | 0.70         | 76.75        | 78.61         | 23.18       | 81.95        |
| 84            | 52.67              | 1.74        | 0.33          | 2.20       | 1.53         | 8.48          | 4.01        | 17.92          | 0.02         | 51.89        | 53.85         | 14.57       | 55.79        |

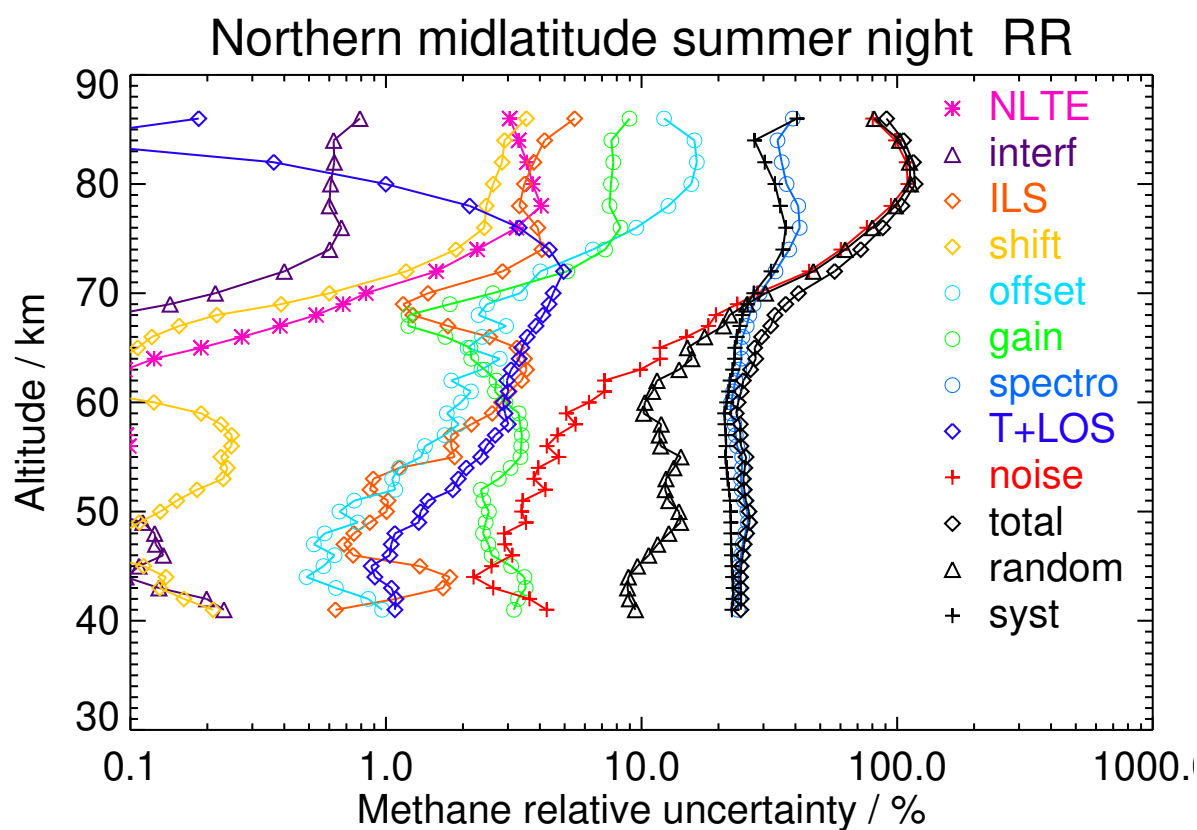

**Figure S116.** V8R\_CH4\_662 Northern midlatitude summer night

**Table S117.** Methane error budget for Northern midlatitude autumn day. All uncertainties are  $1\sigma$ .

| altitude (km) | mean target (ppbv) | NLTE (ppbv) | interf (ppbv) | ILS (ppbv) | shift (ppbv) | offset (ppbv) | gain (ppbv) | spectro (ppbv) | T+LOS (ppbv) | noise (ppbv) | random (ppbv) | syst (ppbv) | total (ppbv) |
|---------------|--------------------|-------------|---------------|------------|--------------|---------------|-------------|----------------|--------------|--------------|---------------|-------------|--------------|
| 45            | 336.01             | 0.33        | 0.41          | 4.00       | 0.24         | 2.20          | 11.77       | 82.28          | 3.80         | 10.07        | 35.88         | 75.88       | 83.94        |
| 50            | 307.42             | 0.44        | 0.28          | 1.96       | 0.33         | 2.09          | 6.36        | 70.97          | 4.98         | 12.29        | 23.93         | 68.48       | 72.54        |
| 55            | 281.79             | 0.88        | 0.13          | 4.11       | 0.35         | 3.98          | 8.82        | 62.45          | 7.57         | 15.19        | 20.07         | 62.42       | 65.57        |
| 60            | 224.75             | 0.81        | 0.10          | 5.99       | 0.21         | 4.61          | 6.57        | 51.58          | 6.28         | 16.43        | 20.20         | 51.60       | 55.41        |
| 65            | 174.78             | 0.46        | 0.03          | 4.72       | 0.11         | 3.25          | 3.26        | 44.31          | 5.82         | 21.78        | 27.23         | 42.11       | 50.15        |
| 70            | 92.54              | 0.60        | 0.16          | 1.10       | 0.44         | 3.80          | 2.57        | 26.90          | 4.24         | 29.93        | 32.35         | 24.78       | 40.75        |
| 74            | 60.61              | 1.57        | 0.37          | 2.77       | 1.08         | 6.00          | 7.33        | 25.07          | 4.39         | 45.03        | 48.63         | 20.29       | 52.70        |
| 80            | 39.69              | 1.45        | 0.32          | 2.47       | 0.98         | 6.94          | 6.91        | 15.86          | 2.88         | 44.16        | 45.90         | 14.45       | 48.12        |

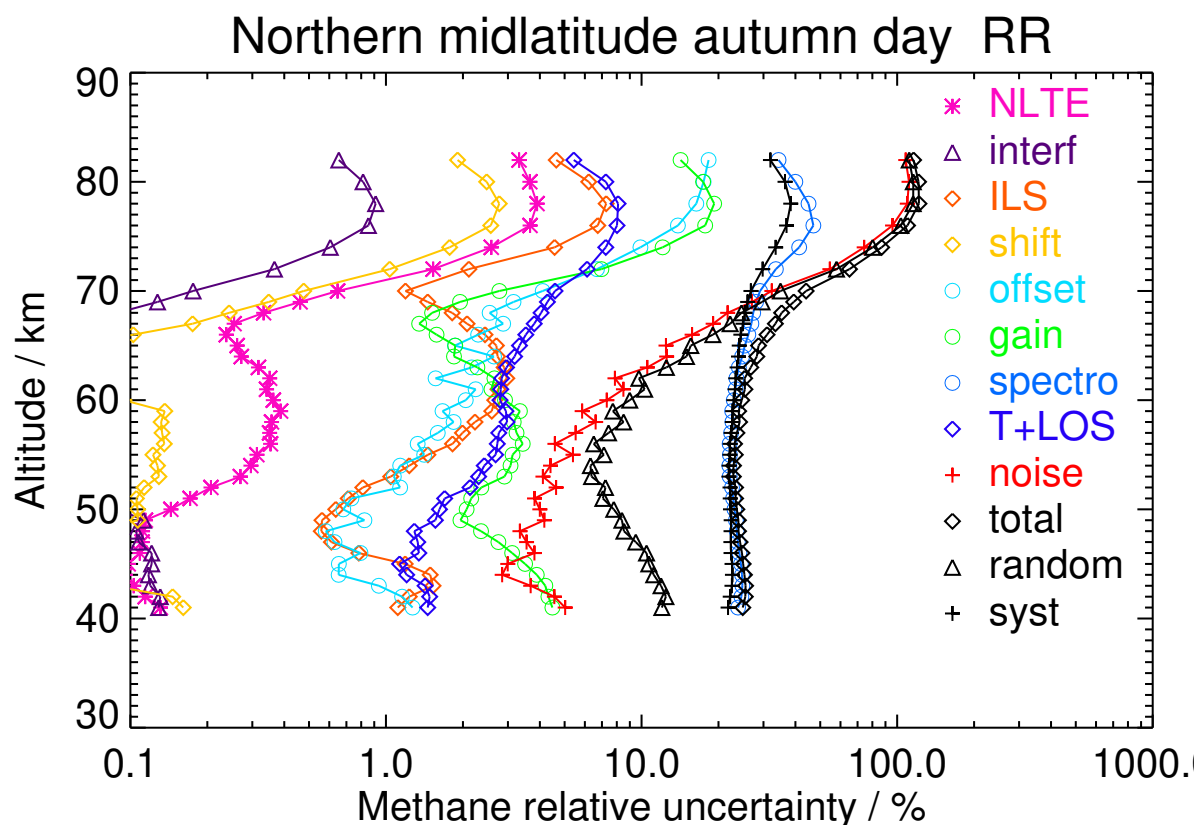

**Figure S117.** V8R\_CH4\_662 Northern midlatitude autumn day



**Table S118.** Methane error budget for Northern midlatitude autumn night. All uncertainties are  $1\sigma$ .

| altitude (km) | mean target (ppbv) | NLTE (ppbv) | interf (ppbv) | ILS (ppbv) | shift (ppbv) | offset (ppbv) | gain (ppbv) | spectro (ppbv) | T+LOS (ppbv) | noise (ppbv) | random (ppbv) | syst (ppbv) | total (ppbv) |
|---------------|--------------------|-------------|---------------|------------|--------------|---------------|-------------|----------------|--------------|--------------|---------------|-------------|--------------|
| 45            | 292.10             | 0.14        | 0.36          | 4.54       | 0.29         | 1.91          | 11.64       | 79.59          | 3.38         | 9.10         | 42.19         | 69.35       | 81.17        |
| 50            | 238.08             | 0.22        | 0.16          | 2.52       | 0.21         | 2.02          | 6.60        | 57.32          | 4.15         | 10.11        | 23.00         | 54.13       | 58.81        |
| 55            | 248.39             | 0.40        | 0.09          | 3.86       | 0.28         | 3.35          | 7.55        | 56.23          | 6.41         | 13.97        | 21.65         | 54.88       | 59.00        |
| 60            | 224.82             | 0.46        | 0.10          | 5.88       | 0.20         | 4.09          | 6.28        | 51.80          | 6.60         | 16.17        | 22.81         | 50.58       | 55.49        |
| 65            | 166.73             | 0.28        | 0.06          | 5.16       | 0.20         | 3.53          | 3.26        | 42.54          | 5.65         | 21.92        | 27.81         | 39.98       | 48.70        |
| 70            | 87.17              | 0.60        | 0.21          | 1.63       | 0.57         | 3.55          | 3.39        | 27.21          | 4.10         | 29.20        | 32.35         | 24.31       | 40.46        |
| 74            | 56.11              | 1.32        | 0.39          | 2.84       | 1.24         | 5.95          | 7.59        | 26.64          | 4.28         | 43.14        | 48.04         | 19.65       | 51.90        |
| 80            | 47.98              | 1.12        | 0.26          | 1.46       | 0.82         | 8.39          | 4.93        | 17.15          | 2.83         | 54.55        | 56.09         | 15.18       | 58.11        |

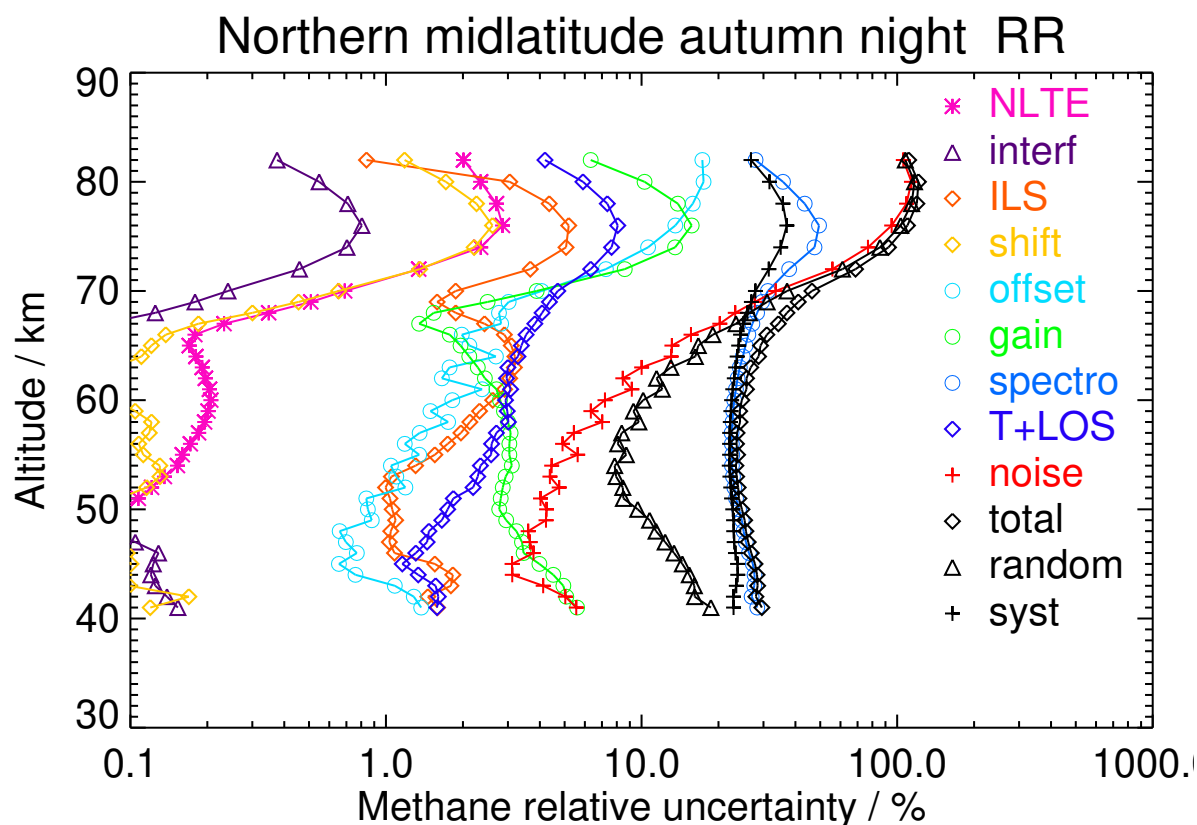

**Figure S118.** V8R\_CH4\_662 Northern midlatitude autumn night

**Table S119.** Methane error budget for Tropics day. All uncertainties are  $1\sigma$ .

| altitude (km) | mean target (ppbv) | NLTE (ppbv) | interf (ppbv) | ILS (ppbv) | shift (ppbv) | offset (ppbv) | gain (ppbv) | spectro (ppbv) | T+LOS (ppbv) | noise (ppbv) | random (ppbv) | syst (ppbv) | total (ppbv) |
|---------------|--------------------|-------------|---------------|------------|--------------|---------------|-------------|----------------|--------------|--------------|---------------|-------------|--------------|
| 40            | 627.43             | 0.59        | 0.81          | 3.34       | 2.05         | 6.44          | 24.02       | 144.60         | 6.44         | 31.18        | 42.56         | 144.04      | 150.19       |
| 45            | 436.54             | 0.30        | 0.70          | 6.01       | 0.65         | 2.33          | 12.80       | 101.75         | 3.98         | 12.63        | 23.45         | 100.92      | 103.60       |
| 50            | 291.63             | 0.47        | 0.24          | 3.87       | 0.35         | 2.17          | 8.32        | 66.49          | 4.60         | 9.24         | 17.05         | 65.78       | 67.95        |
| 55            | 205.94             | 0.56        | 0.17          | 4.66       | 0.46         | 2.84          | 7.70        | 46.09          | 4.84         | 9.36         | 13.90         | 46.17       | 48.21        |
| 60            | 167.68             | 0.49        | 0.13          | 4.82       | 0.30         | 3.26          | 5.32        | 38.23          | 4.15         | 11.29        | 13.48         | 38.56       | 40.85        |
| 65            | 138.44             | 0.30        | 0.05          | 4.23       | 0.15         | 2.86          | 2.86        | 33.10          | 3.71         | 17.20        | 18.44         | 33.16       | 37.94        |
| 70            | 97.84              | 0.67        | 0.17          | 0.91       | 0.46         | 3.54          | 2.10        | 26.49          | 4.07         | 28.27        | 29.79         | 25.47       | 39.19        |
| 74            | 71.28              | 2.01        | 0.46          | 3.15       | 1.42         | 5.93          | 7.88        | 27.26          | 5.30         | 47.66        | 50.65         | 24.31       | 56.18        |
| 80            | 32.59              | 1.11        | 0.28          | 1.83       | 0.90         | 4.57          | 5.13        | 11.35          | 1.82         | 31.07        | 32.08         | 11.01       | 33.91        |

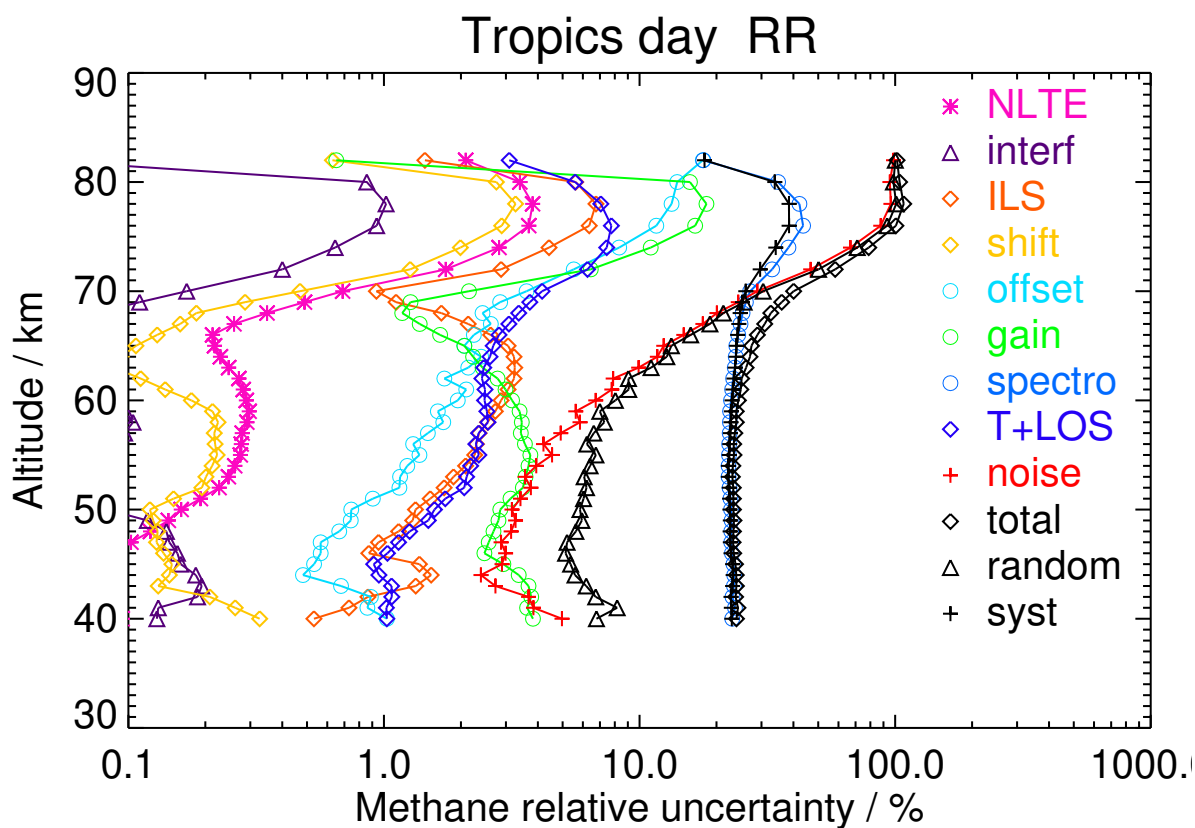

**Figure S119.** V8R\_CH4\_662 Tropics day

**Table S120.** Methane error budget for Tropics night. All uncertainties are  $1\sigma$ .

| altitude (km) | mean target (ppbv) | NLTE (ppbv) | interf (ppbv) | ILS (ppbv) | shift (ppbv) | offset (ppbv) | gain (ppbv) | spectro (ppbv) | T+LOS (ppbv) | noise (ppbv) | random (ppbv) | syst (ppbv) | total (ppbv) |
|---------------|--------------------|-------------|---------------|------------|--------------|---------------|-------------|----------------|--------------|--------------|---------------|-------------|--------------|
| 45            | 448.73             | 0.16        | 0.49          | 7.13       | 0.60         | 2.31          | 14.66       | 104.99         | 4.29         | 12.36        | 21.46         | 104.90      | 107.07       |
| 50            | 299.31             | 0.21        | 0.19          | 4.30       | 0.31         | 2.30          | 8.50        | 68.57          | 4.93         | 9.23         | 16.91         | 67.98       | 70.05        |
| 55            | 217.17             | 0.23        | 0.15          | 5.24       | 0.41         | 2.97          | 7.84        | 48.96          | 5.22         | 10.21        | 14.35         | 49.19       | 51.25        |
| 60            | 172.74             | 0.15        | 0.10          | 5.26       | 0.23         | 2.85          | 4.97        | 39.57          | 4.20         | 10.59        | 12.96         | 39.85       | 41.91        |
| 65            | 143.97             | 0.24        | 0.04          | 4.68       | 0.17         | 3.40          | 2.79        | 34.72          | 4.38         | 18.71        | 20.88         | 34.35       | 40.20        |
| 70            | 100.77             | 1.18        | 0.45          | 2.98       | 1.27         | 3.61          | 7.50        | 31.09          | 5.33         | 31.58        | 33.72         | 30.61       | 45.54        |
| 74            | 67.07              | 2.22        | 0.81          | 5.89       | 2.81         | 6.19          | 13.79       | 32.10          | 6.96         | 48.20        | 52.49         | 30.38       | 60.65        |
| 80            | 73.01              | 3.79        | 0.40          | 1.32       | 1.80         | 10.54         | 6.70        | 26.08          | 7.08         | 71.80        | 73.87         | 24.60       | 77.85        |

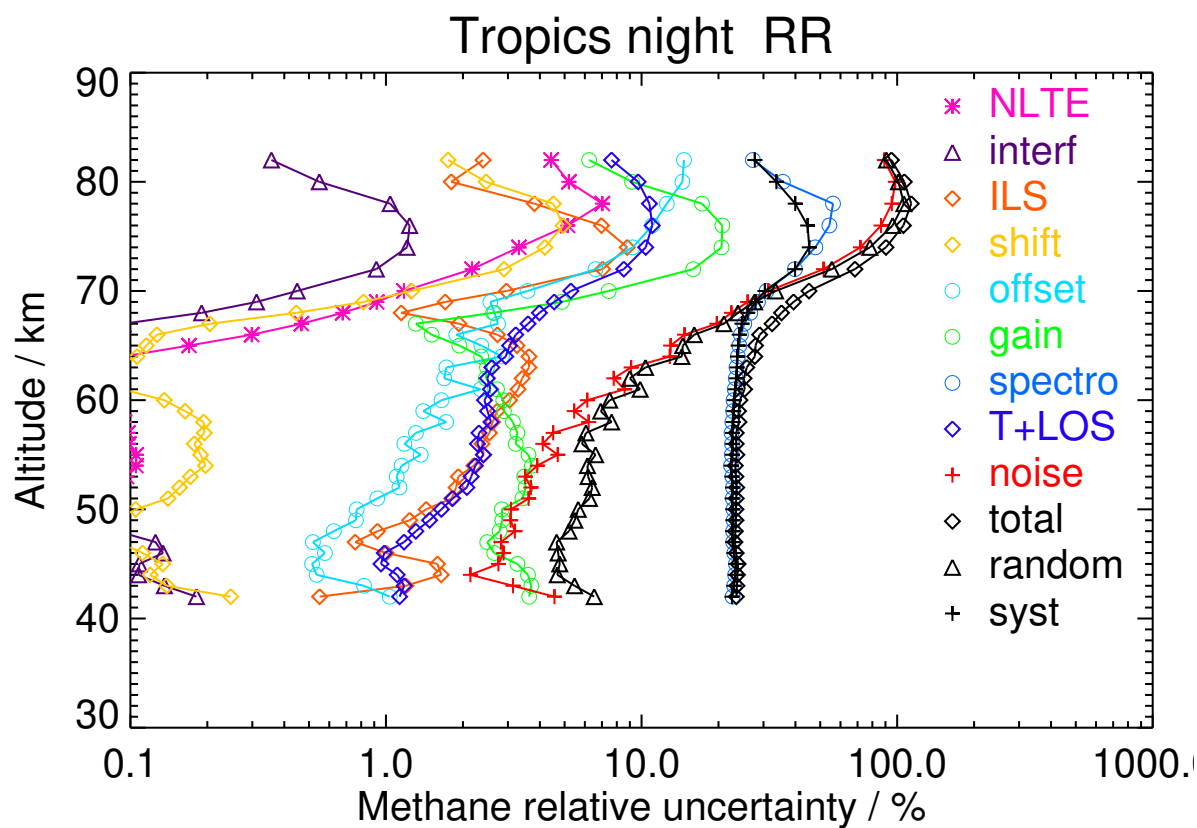

**Figure S120.** V8R\_CH4\_662 Tropics night

**Table S121.** Methane error budget for Southern midlatitude winter day. All uncertainties are  $1\sigma$ .

| altitude (km) | mean target (ppbv) | NLTE (ppbv) | interf (ppbv) | ILS (ppbv) | shift (ppbv) | offset (ppbv) | gain (ppbv) | spectro (ppbv) | T+LOS (ppbv) | noise (ppbv) | random (ppbv) | syst (ppbv) | total (ppbv) |
|---------------|--------------------|-------------|---------------|------------|--------------|---------------|-------------|----------------|--------------|--------------|---------------|-------------|--------------|
| 45            | 182.34             | 0.20        | 0.07          | 2.49       | 0.22         | 1.06          | 6.14        | 41.93          | 2.15         | 5.29         | 13.63         | 40.62       | 42.85        |
| 50            | 196.97             | 0.33        | 0.08          | 1.69       | 0.22         | 1.70          | 4.62        | 45.34          | 3.03         | 8.38         | 14.30         | 44.25       | 46.50        |
| 55            | 178.21             | 0.57        | 0.09          | 2.70       | 0.24         | 2.16          | 5.16        | 39.92          | 4.02         | 10.85        | 14.00         | 39.63       | 42.03        |
| 60            | 160.29             | 0.56        | 0.06          | 3.34       | 0.14         | 2.04          | 3.50        | 37.35          | 3.95         | 12.53        | 15.21         | 36.94       | 39.95        |
| 65            | 116.28             | 0.43        | 0.06          | 2.98       | 0.17         | 2.90          | 1.89        | 28.95          | 3.17         | 18.99        | 20.68         | 28.32       | 35.07        |
| 70            | 68.55              | 0.34        | 0.13          | 0.99       | 0.39         | 3.30          | 1.57        | 20.32          | 2.45         | 25.17        | 26.69         | 18.84       | 32.67        |
| 74            | 45.67              | 0.61        | 0.28          | 1.71       | 1.08         | 5.50          | 3.77        | 19.37          | 2.07         | 38.05        | 40.36         | 15.73       | 43.32        |
| 80            | 39.15              | 0.68        | 0.29          | 2.34       | 1.17         | 7.02          | 4.27        | 15.01          | 1.42         | 43.43        | 44.90         | 13.13       | 46.78        |

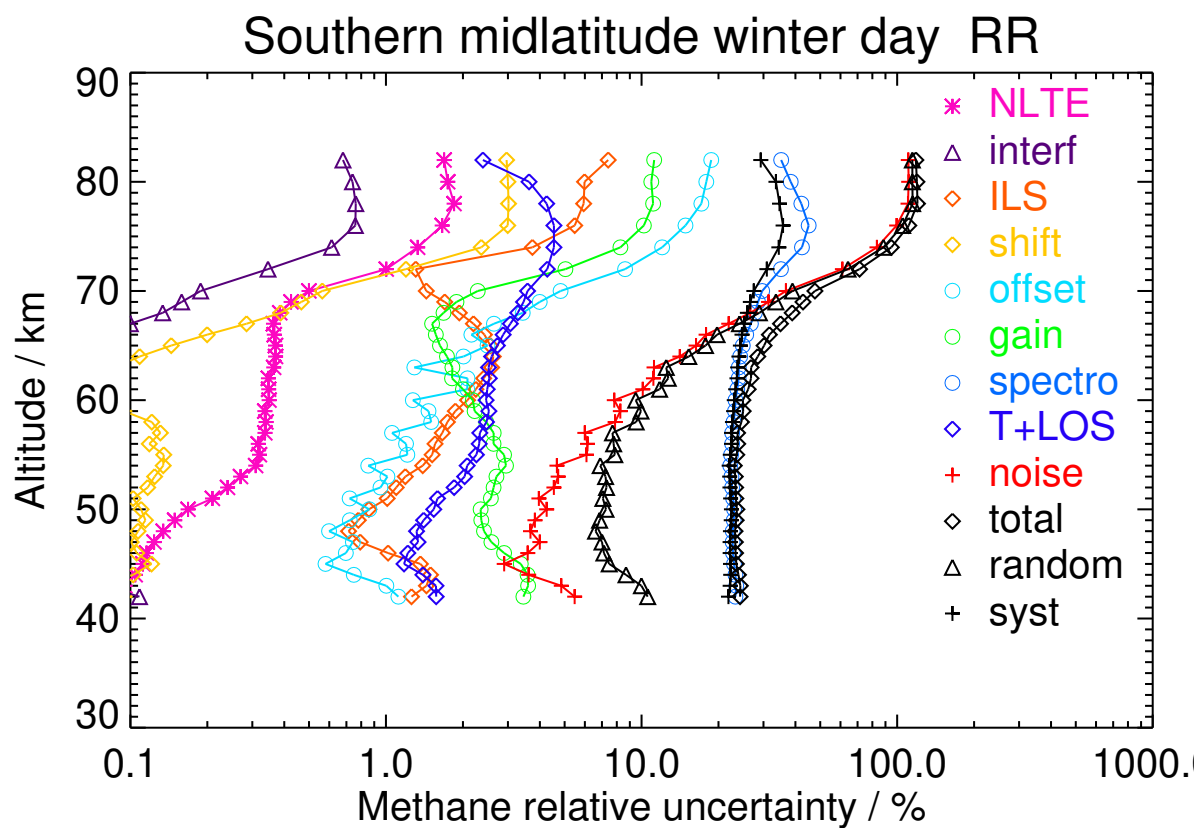

**Figure S121.** V8R\_CH4\_662 Southern midlatitude winter day

**Table S122.** Methane error budget for Southern midlatitude winter night. All uncertainties are  $1\sigma$ .

| altitude (km) | mean target (ppbv) | NLTE (ppbv) | interf (ppbv) | ILS (ppbv) | shift (ppbv) | offset (ppbv) | gain (ppbv) | spectro (ppbv) | T+LOS (ppbv) | noise (ppbv) | random (ppbv) | syst (ppbv) | total (ppbv) |
|---------------|--------------------|-------------|---------------|------------|--------------|---------------|-------------|----------------|--------------|--------------|---------------|-------------|--------------|
| 45            | 196.32             | 0.15        | 0.09          | 2.56       | 0.26         | 1.37          | 7.42        | 47.53          | 2.56         | 6.53         | 13.16         | 46.89       | 48.70        |
| 50            | 213.24             | 0.26        | 0.08          | 2.21       | 0.22         | 1.90          | 6.46        | 51.43          | 3.73         | 9.19         | 16.82         | 50.11       | 52.86        |
| 55            | 180.54             | 0.36        | 0.09          | 2.65       | 0.19         | 2.40          | 5.37        | 43.61          | 4.28         | 11.69        | 16.04         | 42.92       | 45.81        |
| 60            | 153.37             | 0.41        | 0.05          | 3.45       | 0.13         | 2.15          | 3.30        | 38.02          | 3.55         | 12.18        | 14.92         | 37.56       | 40.42        |
| 65            | 122.64             | 0.40        | 0.09          | 2.85       | 0.26         | 2.65          | 1.62        | 32.84          | 3.57         | 19.75        | 23.13         | 31.05       | 38.72        |
| 70            | 79.87              | 0.44        | 0.18          | 1.13       | 0.56         | 3.79          | 2.77        | 22.20          | 3.27         | 28.62        | 30.23         | 20.81       | 36.70        |
| 74            | 49.61              | 0.40        | 0.28          | 1.21       | 0.89         | 6.11          | 4.59        | 16.06          | 2.76         | 43.17        | 44.70         | 13.86       | 46.80        |
| 80            | 39.48              | 0.42        | 0.27          | 1.53       | 0.83         | 6.25          | 4.67        | 11.59          | 1.85         | 41.86        | 42.86         | 10.83       | 44.21        |

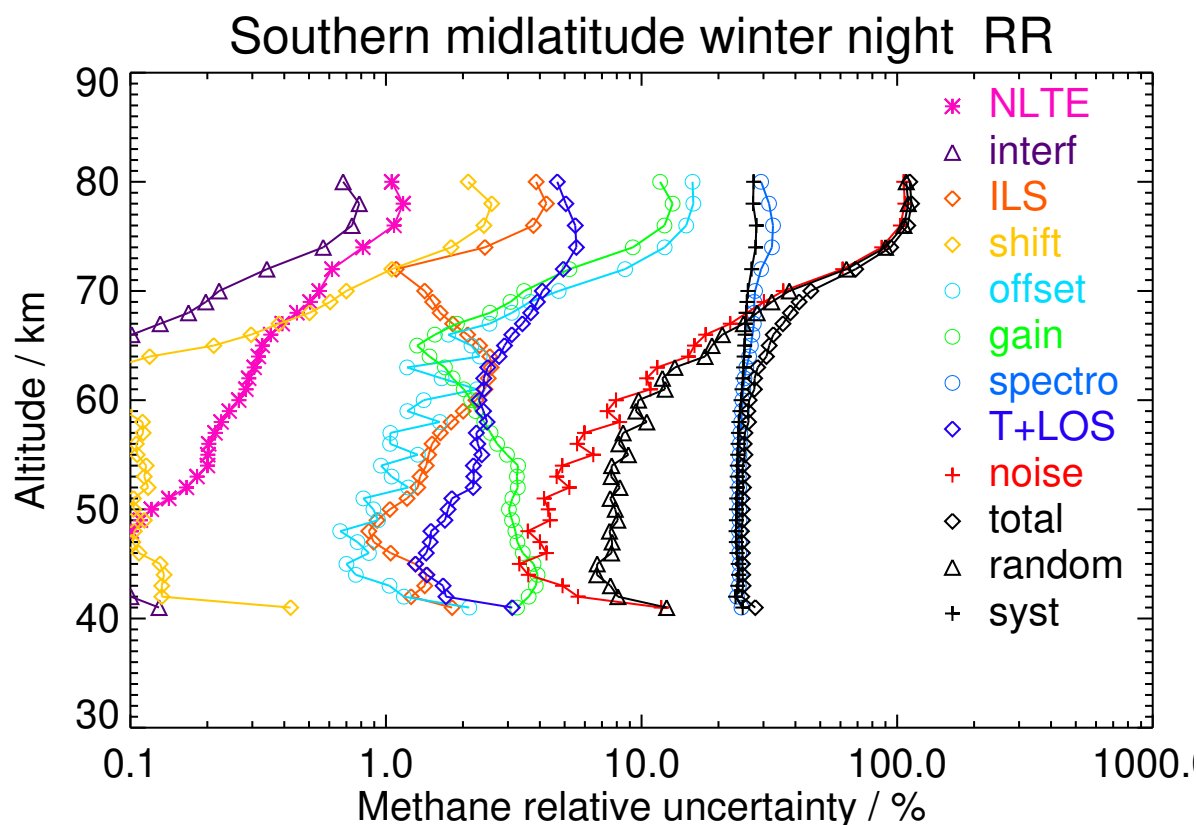

**Figure S122.** V8R\_CH4\_662 Southern midlatitude winter night

**Table S123.** Methane error budget for Southern midlatitude spring day. All uncertainties are  $1\sigma$ .

| altitude (km) | mean target (ppbv) | NLTE (ppbv) | interf (ppbv) | ILS (ppbv) | shift (ppbv) | offset (ppbv) | gain (ppbv) | spectro (ppbv) | T+LOS (ppbv) | noise (ppbv) | random (ppbv) | syst (ppbv) | total (ppbv) |
|---------------|--------------------|-------------|---------------|------------|--------------|---------------|-------------|----------------|--------------|--------------|---------------|-------------|--------------|
| 45            | 259.98             | 0.24        | 0.20          | 3.45       | 0.29         | 1.41          | 8.25        | 60.03          | 2.64         | 6.68         | 10.49         | 60.23       | 61.13        |
| 50            | 268.95             | 0.36        | 0.20          | 2.37       | 0.30         | 2.05          | 5.96        | 61.74          | 4.09         | 9.70         | 13.44         | 61.54       | 63.00        |
| 55            | 240.91             | 0.66        | 0.09          | 4.04       | 0.34         | 2.95          | 6.93        | 53.10          | 5.47         | 10.86        | 14.26         | 53.27       | 55.15        |
| 60            | 212.68             | 0.76        | 0.14          | 5.99       | 0.33         | 3.28          | 6.30        | 47.15          | 5.42         | 11.86        | 15.03         | 47.48       | 49.80        |
| 65            | 161.49             | 0.43        | 0.03          | 5.19       | 0.17         | 3.71          | 2.87        | 38.74          | 4.28         | 19.97        | 21.91         | 38.56       | 44.35        |
| 70            | 86.61              | 0.50        | 0.17          | 0.99       | 0.50         | 2.92          | 2.33        | 25.54          | 3.09         | 26.94        | 28.58         | 24.21       | 37.46        |
| 74            | 47.01              | 1.08        | 0.35          | 3.16       | 1.13         | 4.94          | 6.47        | 19.04          | 3.04         | 37.19        | 38.68         | 18.36       | 42.82        |
| 80            | 30.08              | 0.94        | 0.31          | 3.04       | 1.17         | 4.96          | 5.77        | 13.29          | 1.88         | 33.23        | 34.33         | 13.24       | 36.80        |

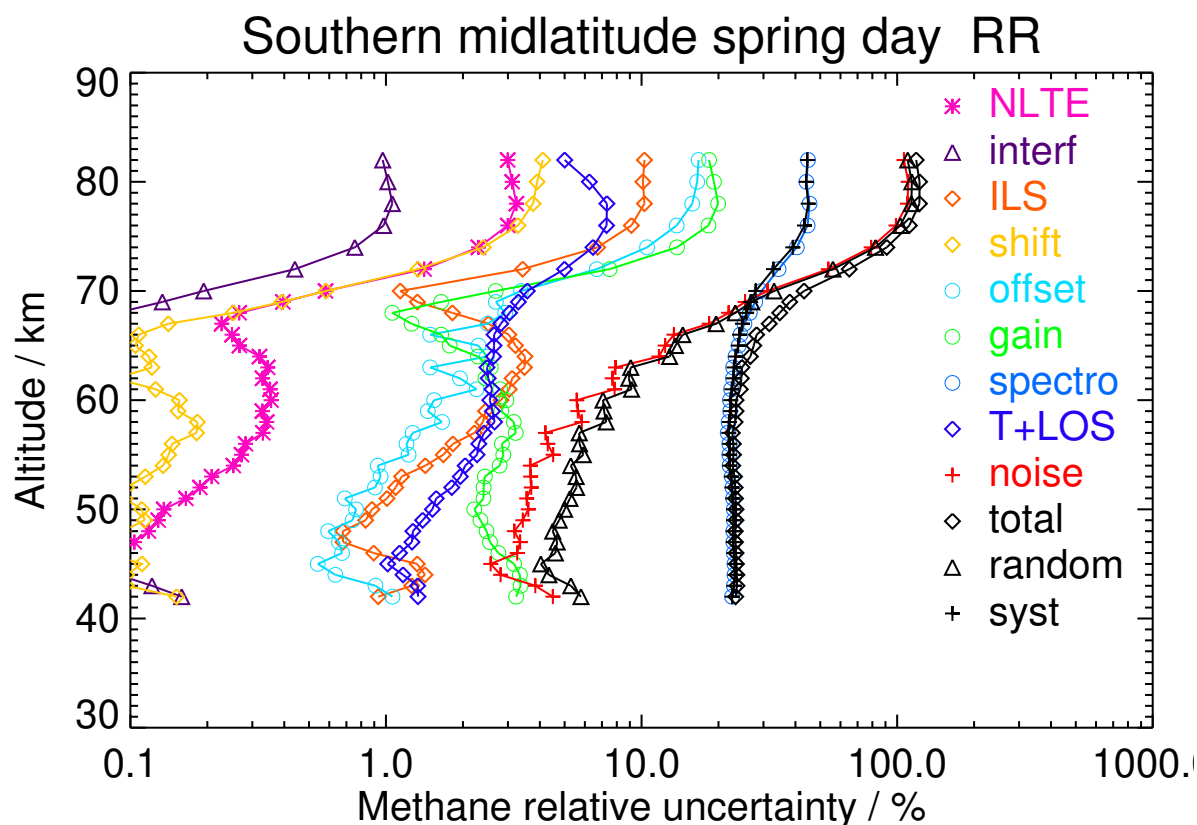

**Figure S123.** V8R\_CH4\_662 Southern midlatitude spring day

**Table S124.** Methane error budget for Southern midlatitude spring night. All uncertainties are  $1\sigma$ .

| altitude (km) | mean target (ppbv) | NLTE (ppbv) | interf (ppbv) | ILS (ppbv) | shift (ppbv) | offset (ppbv) | gain (ppbv) | spectro (ppbv) | T+LOS (ppbv) | noise (ppbv) | random (ppbv) | syst (ppbv) | total (ppbv) |
|---------------|--------------------|-------------|---------------|------------|--------------|---------------|-------------|----------------|--------------|--------------|---------------|-------------|--------------|
| 45            | 259.80             | 0.12        | 0.16          | 3.75       | 0.30         | 1.38          | 8.61        | 60.65          | 2.57         | 6.45         | 9.21          | 61.09       | 61.78        |
| 50            | 255.33             | 0.19        | 0.19          | 2.43       | 0.28         | 1.75          | 5.74        | 58.31          | 3.76         | 8.57         | 11.89         | 58.21       | 59.41        |
| 55            | 242.55             | 0.39        | 0.12          | 4.69       | 0.37         | 3.13          | 7.63        | 53.82          | 5.87         | 11.36        | 14.39         | 54.25       | 56.13        |
| 60            | 214.41             | 0.42        | 0.15          | 6.63       | 0.31         | 3.59          | 6.51        | 48.13          | 5.80         | 12.50        | 15.29         | 48.71       | 51.05        |
| 65            | 164.63             | 0.25        | 0.05          | 5.85       | 0.21         | 3.56          | 3.25        | 40.29          | 5.07         | 19.49        | 22.87         | 39.54       | 45.68        |
| 70            | 87.21              | 0.55        | 0.20          | 0.96       | 0.57         | 3.07          | 2.70        | 26.24          | 3.82         | 27.89        | 30.23         | 24.20       | 38.72        |
| 74            | 52.86              | 0.97        | 0.39          | 3.41       | 1.17         | 4.98          | 6.71        | 21.54          | 3.96         | 38.79        | 41.07         | 19.53       | 45.48        |
| 80            | 43.07              | 1.89        | 0.50          | 4.78       | 1.94         | 6.53          | 8.94        | 22.24          | 3.08         | 44.79        | 48.36         | 18.02       | 51.61        |
| 84            | 32.51              | 0.76        | 0.27          | 2.79       | 1.10         | 5.81          | 4.96        | 13.03          | 1.21         | 33.28        | 33.84         | 14.20       | 36.70        |

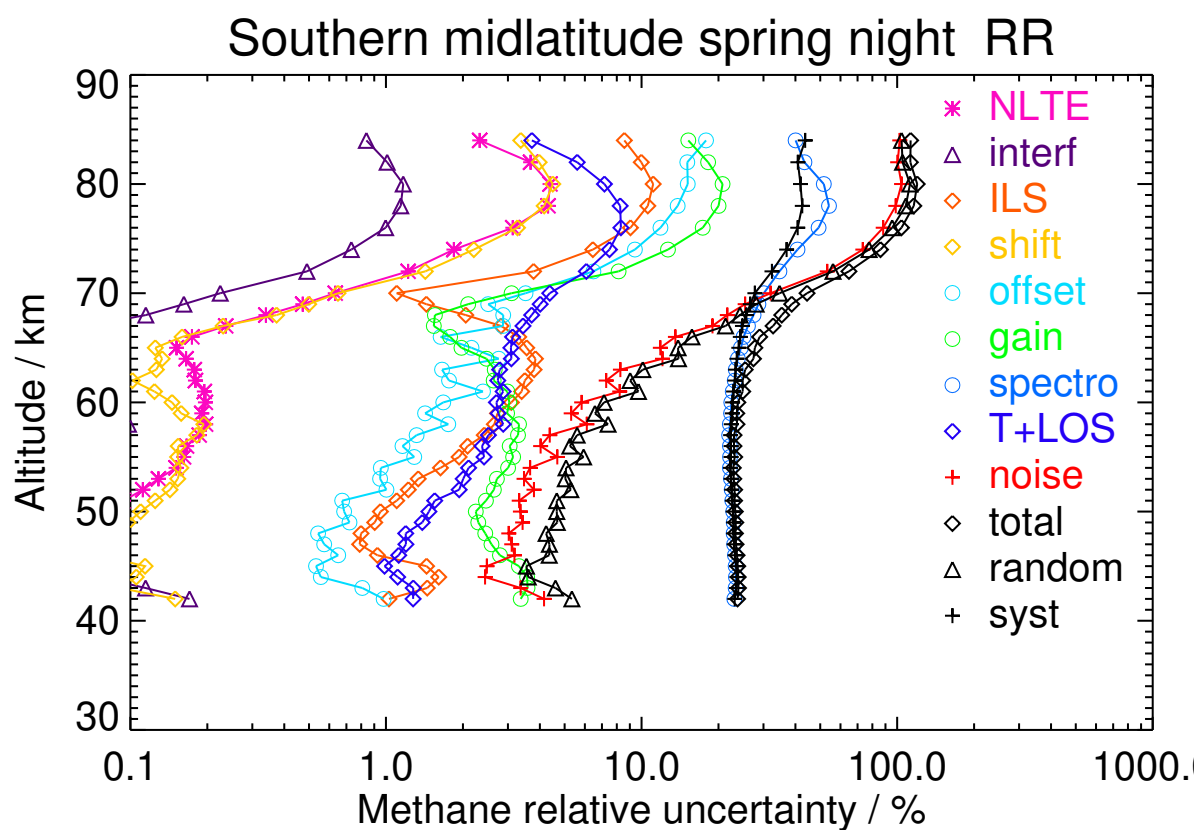

**Figure S124.** V8R\_CH4\_662 Southern midlatitude spring night

**Table S125.** Methane error budget for Southern midlatitude summer day. All uncertainties are  $1\sigma$ .

| altitude (km) | mean target (ppbv) | NLTE (ppbv) | interf (ppbv) | ILS (ppbv) | shift (ppbv) | offset (ppbv) | gain (ppbv) | spectro (ppbv) | T+LOS (ppbv) | noise (ppbv) | random (ppbv) | syst (ppbv) | total (ppbv) |
|---------------|--------------------|-------------|---------------|------------|--------------|---------------|-------------|----------------|--------------|--------------|---------------|-------------|--------------|
| 45            | 198.69             | 0.17        | 0.14          | 4.56       | 0.41         | 1.13          | 7.06        | 47.16          | 1.69         | 5.41         | 16.69         | 45.27       | 48.25        |
| 50            | 123.92             | 0.13        | 0.07          | 1.75       | 0.13         | 0.77          | 2.57        | 30.44          | 1.41         | 3.92         | 12.28         | 28.35       | 30.89        |
| 55            | 135.50             | 0.27        | 0.04          | 1.78       | 0.29         | 1.75          | 3.44        | 35.27          | 2.50         | 5.74         | 19.73         | 30.20       | 36.07        |
| 60            | 169.67             | 0.50        | 0.16          | 5.74       | 0.34         | 2.89          | 5.49        | 40.10          | 3.85         | 8.83         | 19.70         | 37.22       | 42.11        |
| 65            | 127.84             | 0.25        | 0.03          | 4.31       | 0.12         | 3.25          | 2.16        | 31.42          | 3.21         | 15.84        | 18.81         | 30.47       | 35.81        |
| 70            | 107.57             | 0.52        | 0.10          | 1.34       | 0.33         | 3.37          | 1.42        | 28.28          | 3.15         | 29.16        | 30.86         | 26.90       | 40.94        |
| 74            | 99.09              | 1.98        | 0.48          | 3.21       | 1.35         | 6.42          | 4.94        | 34.12          | 2.62         | 51.47        | 54.27         | 30.93       | 62.46        |
| 80            | 70.50              | 3.95        | 1.01          | 6.74       | 3.28         | 9.25          | 10.68       | 35.51          | 0.10         | 68.03        | 71.57         | 32.24       | 78.50        |
| 84            | 67.55              | 4.31        | 0.93          | 5.89       | 3.24         | 10.34         | 9.31        | 29.23          | 0.22         | 67.93        | 70.85         | 26.58       | 75.68        |

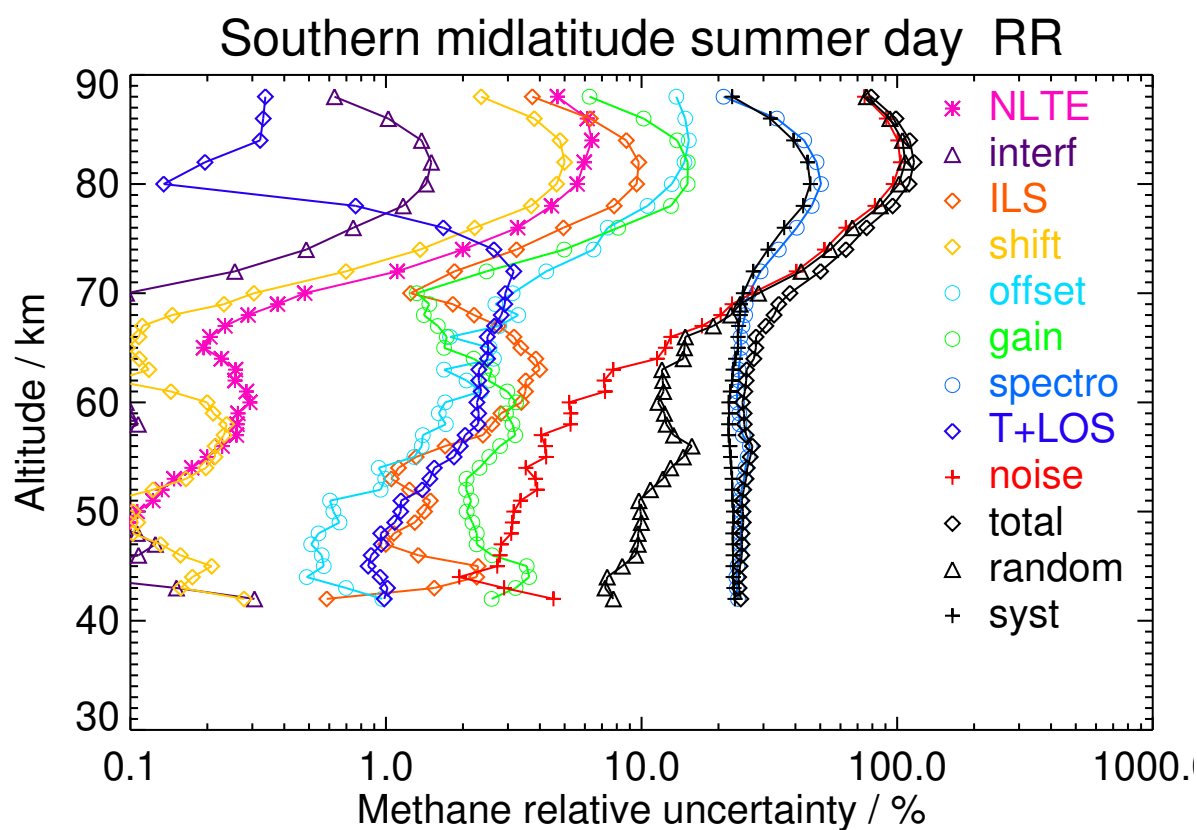

**Figure S125.** V8R\_CH4\_662 Southern midlatitude summer day



**Table S126.** Methane error budget for Southern midlatitude summer night. All uncertainties are  $1\sigma$ .

| altitude (km) | mean target (ppbv) | NLTE (ppbv) | interf (ppbv) | ILS (ppbv) | shift (ppbv) | offset (ppbv) | gain (ppbv) | spectro (ppbv) | T+LOS (ppbv) | noise (ppbv) | random (ppbv) | syst (ppbv) | total (ppbv) |
|---------------|--------------------|-------------|---------------|------------|--------------|---------------|-------------|----------------|--------------|--------------|---------------|-------------|--------------|
| 45            | 270.33             | 0.12        | 0.23          | 5.11       | 0.49         | 1.59          | 10.54       | 70.26          | 2.51         | 7.08         | 32.11         | 64.04       | 71.64        |
| 50            | 203.45             | 0.19        | 0.10          | 3.54       | 0.61         | 2.12          | 8.56        | 57.30          | 3.28         | 6.54         | 34.61         | 47.23       | 58.55        |
| 55            | 172.78             | 0.19        | 0.15          | 4.33       | 0.54         | 2.84          | 7.92        | 44.71          | 4.20         | 8.02         | 25.41         | 39.05       | 46.59        |
| 60            | 173.15             | 0.14        | 0.13          | 5.35       | 0.29         | 3.10          | 5.49        | 41.06          | 4.51         | 10.18        | 16.99         | 39.87       | 43.34        |
| 65            | 171.62             | 0.23        | 0.06          | 5.76       | 0.21         | 4.30          | 3.19        | 42.86          | 5.48         | 21.06        | 25.80         | 41.31       | 48.70        |
| 70            | 126.19             | 0.93        | 0.27          | 1.66       | 0.65         | 3.77          | 2.96        | 35.02          | 5.36         | 35.64        | 38.61         | 32.59       | 50.52        |
| 74            | 101.08             | 2.35        | 0.63          | 3.67       | 1.73         | 6.89          | 7.17        | 35.16          | 4.24         | 57.88        | 61.37         | 30.97       | 68.74        |
| 80            | 60.11              | 2.65        | 0.48          | 2.43       | 1.56         | 10.00         | 6.05        | 20.75          | 0.39         | 66.53        | 68.24         | 18.78       | 70.77        |
| 84            | 56.49              | 2.41        | 0.35          | 1.82       | 1.23         | 10.04         | 4.19        | 14.80          | 0.05         | 58.88        | 60.08         | 14.32       | 61.77        |

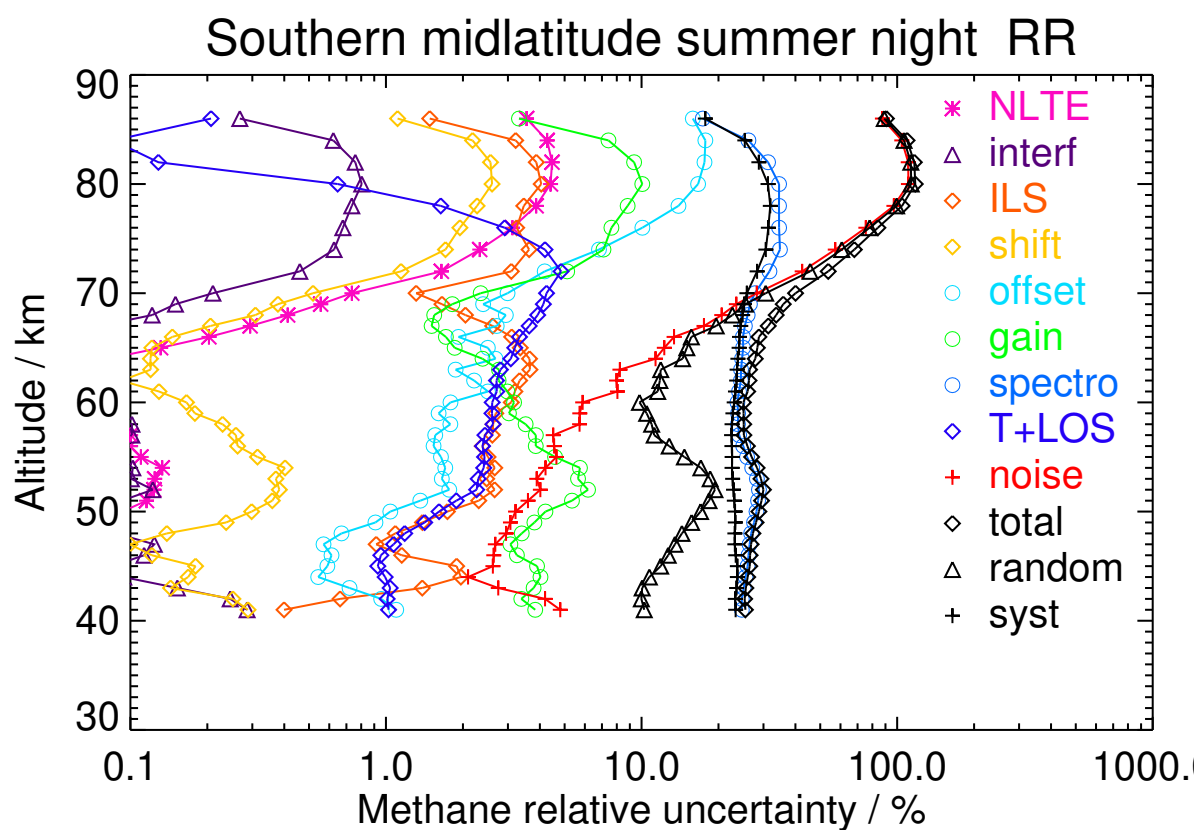

**Figure S126.** V8R\_CH4\_662 Southern midlatitude summer night

**Table S127.** Methane error budget for Southern midlatitude autumn day. All uncertainties are  $1\sigma$ .

| altitude (km) | mean target (ppbv) | NLTE (ppbv) | interf (ppbv) | ILS (ppbv) | shift (ppbv) | offset (ppbv) | gain (ppbv) | spectro (ppbv) | T+LOS (ppbv) | noise (ppbv) | random (ppbv) | syst (ppbv) | total (ppbv) |
|---------------|--------------------|-------------|---------------|------------|--------------|---------------|-------------|----------------|--------------|--------------|---------------|-------------|--------------|
| 45            | 278.41             | 0.40        | 0.21          | 4.31       | 0.30         | 2.10          | 13.10       | 75.98          | 3.85         | 9.18         | 40.45         | 66.56       | 77.89        |
| 50            | 283.39             | 0.60        | 0.14          | 2.50       | 0.30         | 3.03          | 8.77        | 67.98          | 5.54         | 13.70        | 26.66         | 64.98       | 70.24        |
| 55            | 279.14             | 1.02        | 0.12          | 3.43       | 0.26         | 3.79          | 9.69        | 62.59          | 7.91         | 15.36        | 21.65         | 62.20       | 65.86        |
| 60            | 226.95             | 0.89        | 0.10          | 4.90       | 0.21         | 3.21          | 6.68        | 52.78          | 7.19         | 16.29        | 21.07         | 52.33       | 56.41        |
| 65            | 116.73             | 0.36        | 0.05          | 3.46       | 0.14         | 3.10          | 2.10        | 31.33          | 3.67         | 18.90        | 22.93         | 29.19       | 37.12        |
| 70            | 45.43              | 0.23        | 0.08          | 1.09       | 0.19         | 2.57          | 1.52        | 13.05          | 1.53         | 17.55        | 18.71         | 11.86       | 22.15        |
| 74            | 32.08              | 0.67        | 0.16          | 1.27       | 0.45         | 4.22          | 3.57        | 12.55          | 1.60         | 27.61        | 29.46         | 9.35        | 30.90        |
| 80            | 36.76              | 1.10        | 0.30          | 3.09       | 1.06         | 6.22          | 6.92        | 14.58          | 2.75         | 39.81        | 41.21         | 14.31       | 43.63        |

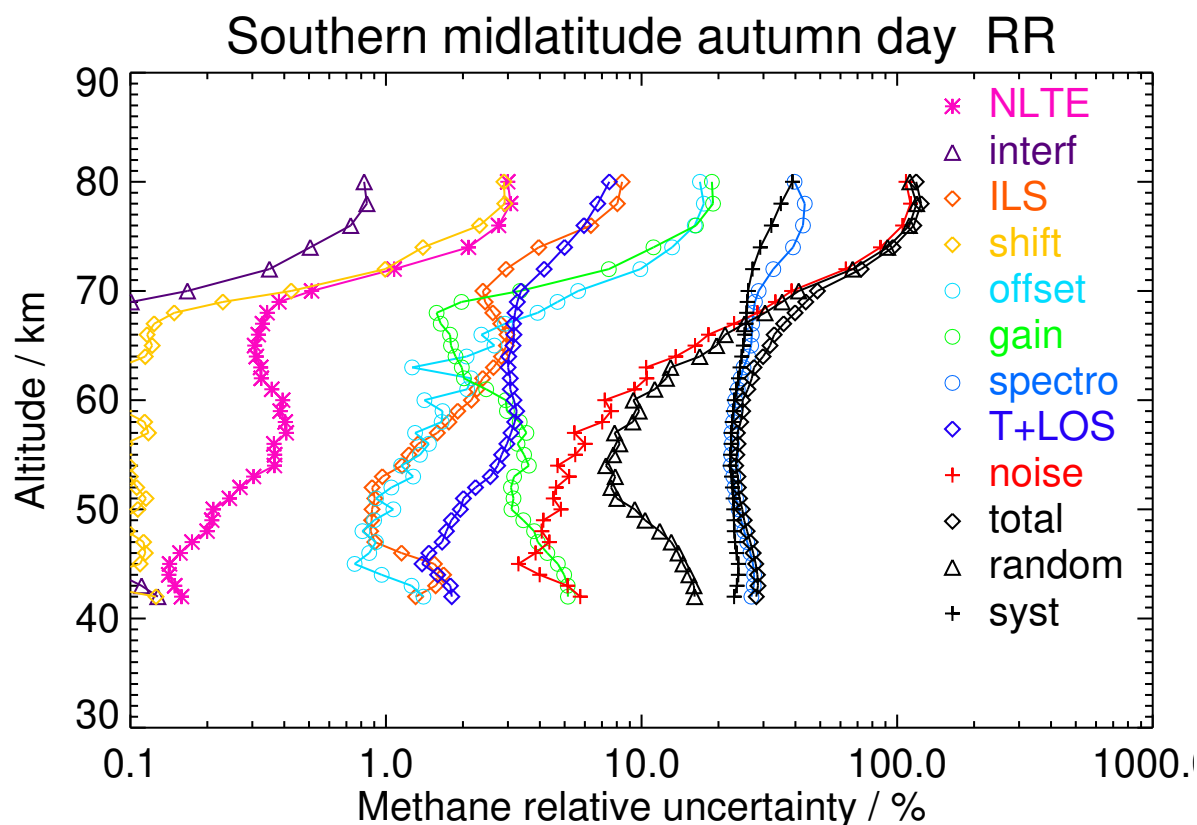

**Figure S127.** V8R\_CH4\_662 Southern midlatitude autumn day

**Table S128.** Methane error budget for Southern midlatitude autumn night. All uncertainties are  $1\sigma$ .

| altitude (km) | mean target (ppbv) | NLTE (ppbv) | interf (ppbv) | ILS (ppbv) | shift (ppbv) | offset (ppbv) | gain (ppbv) | spectro (ppbv) | T+LOS (ppbv) | noise (ppbv) | random (ppbv) | syst (ppbv) | total (ppbv) |
|---------------|--------------------|-------------|---------------|------------|--------------|---------------|-------------|----------------|--------------|--------------|---------------|-------------|--------------|
| 45            | 402.04             | 0.18        | 0.36          | 5.55       | 0.31         | 2.35          | 15.07       | 96.15          | 4.70         | 11.10        | 38.02         | 90.60       | 98.25        |
| 50            | 349.56             | 0.28        | 0.20          | 2.71       | 0.27         | 3.16          | 9.21        | 79.22          | 6.48         | 14.37        | 25.32         | 77.36       | 81.40        |
| 55            | 309.98             | 0.53        | 0.17          | 4.97       | 0.32         | 4.61          | 11.72       | 67.57          | 9.64         | 17.51        | 22.66         | 68.08       | 71.76        |
| 60            | 256.62             | 0.41        | 0.15          | 6.54       | 0.24         | 4.20          | 8.17        | 58.18          | 9.20         | 18.84        | 23.51         | 58.30       | 62.86        |
| 65            | 142.44             | 0.35        | 0.11          | 3.81       | 0.30         | 3.60          | 2.08        | 37.51          | 5.20         | 23.27        | 26.92         | 35.81       | 44.80        |
| 70            | 55.90              | 0.24        | 0.09          | 1.04       | 0.22         | 3.09          | 1.51        | 16.02          | 2.41         | 21.81        | 22.87         | 15.11       | 27.41        |
| 74            | 35.53              | 0.48        | 0.21          | 1.54       | 0.59         | 4.69          | 4.37        | 13.08          | 2.39         | 30.97        | 32.61         | 10.79       | 34.35        |
| 80            | 34.40              | 0.75        | 0.32          | 2.57       | 0.94         | 5.86          | 7.39        | 11.85          | 2.91         | 35.86        | 37.41         | 11.50       | 39.14        |

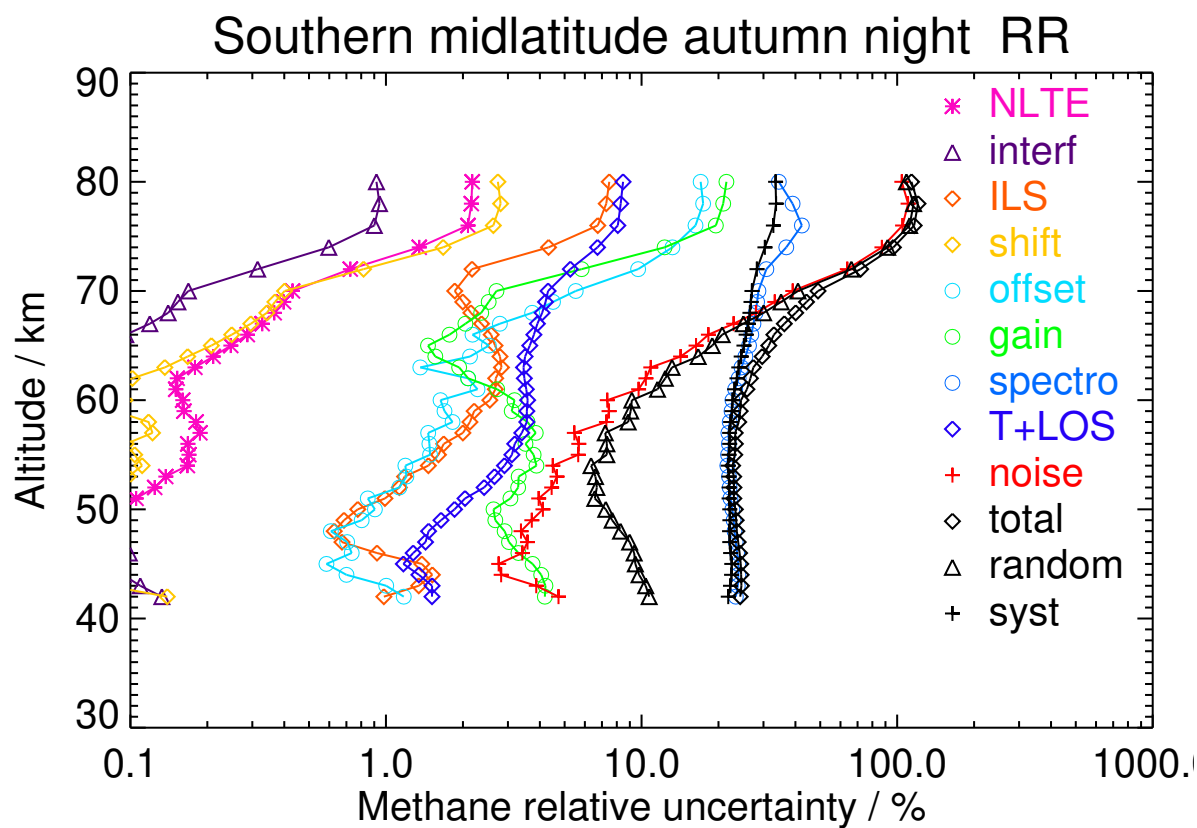

**Figure S128.** V8R\_CH4\_662 Southern midlatitude autumn night

**Table S129.** Methane error budget for Southern polar winter day. All uncertainties are  $1\sigma$ .

| altitude (km) | mean target (ppbv) | NLTE (ppbv) | interf (ppbv) | ILS (ppbv) | shift (ppbv) | offset (ppbv) | gain (ppbv) | spectro (ppbv) | T+LOS (ppbv) | noise (ppbv) | random (ppbv) | syst (ppbv) | total (ppbv) |
|---------------|--------------------|-------------|---------------|------------|--------------|---------------|-------------|----------------|--------------|--------------|---------------|-------------|--------------|
| 45            | 193.76             | 0.22        | 0.06          | 2.83       | 0.35         | 1.06          | 5.59        | 44.49          | 2.32         | 4.93         | 9.30          | 44.31       | 45.27        |
| 50            | 169.96             | 0.25        | 0.07          | 2.16       | 0.26         | 1.17          | 3.49        | 40.01          | 2.28         | 6.09         | 8.86          | 39.79       | 40.77        |
| 55            | 141.22             | 0.40        | 0.06          | 2.40       | 0.24         | 1.17          | 3.13        | 32.43          | 2.19         | 6.96         | 9.17          | 32.22       | 33.50        |
| 60            | 115.10             | 0.44        | 0.04          | 2.78       | 0.14         | 1.05          | 2.13        | 27.25          | 2.05         | 8.59         | 10.44         | 26.92       | 28.88        |
| 65            | 81.13              | 0.42        | 0.03          | 2.19       | 0.10         | 2.05          | 1.20        | 20.32          | 1.58         | 14.16        | 15.36         | 19.77       | 25.03        |
| 70            | 50.40              | 0.22        | 0.11          | 0.68       | 0.45         | 2.69          | 1.26        | 15.84          | 1.33         | 19.59        | 20.80         | 14.61       | 25.42        |
| 74            | 48.05              | 0.50        | 0.32          | 2.42       | 1.36         | 5.19          | 4.16        | 24.27          | 2.04         | 36.90        | 40.97         | 18.13       | 44.80        |
| 80            | 246.35             | 15.84       | 2.27          | 10.07      | 10.04        | 21.90         | 22.02       | 186.94         | 12.69        | 165.95       | 232.11        | 100.97      | 253.12       |
| 84            | 258.41             | 7.28        | 0.40          | 1.82       | 1.94         | 29.27         | 3.08        | 65.18          | 9.23         | 210.90       | 213.13        | 65.68       | 223.02       |

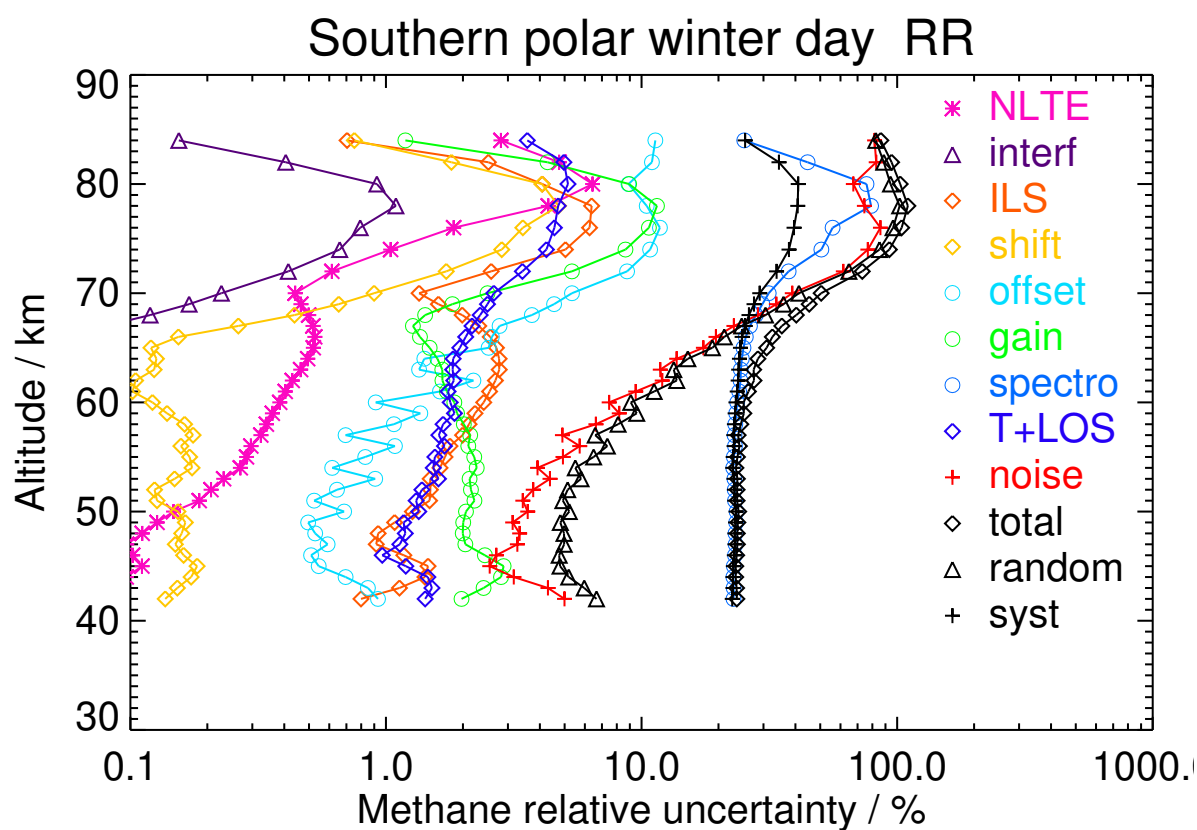

**Figure S129.** V8R\_CH4\_662 Southern polar winter day

**Table S130.** Methane error budget for Southern polar winter night. All uncertainties are  $1\sigma$ .

| altitude (km) | mean target (ppbv) | NLTE (ppbv) | interf (ppbv) | ILS (ppbv) | shift (ppbv) | offset (ppbv) | gain (ppbv) | spectro (ppbv) | T+LOS (ppbv) | noise (ppbv) | random (ppbv) | syst (ppbv) | total (ppbv) |
|---------------|--------------------|-------------|---------------|------------|--------------|---------------|-------------|----------------|--------------|--------------|---------------|-------------|--------------|
| 45            | 127.15             | 0.15        | 0.03          | 1.68       | 0.21         | 0.71          | 3.43        | 29.31          | 1.64         | 3.92         | 5.75          | 29.32       | 29.87        |
| 50            | 121.24             | 0.18        | 0.04          | 1.07       | 0.13         | 1.00          | 2.42        | 29.32          | 1.70         | 6.13         | 8.42          | 28.94       | 30.14        |
| 55            | 98.79              | 0.27        | 0.02          | 1.34       | 0.10         | 0.96          | 1.77        | 24.72          | 1.50         | 7.04         | 9.75          | 23.95       | 25.86        |
| 60            | 80.83              | 0.38        | 0.02          | 1.75       | 0.09         | 0.87          | 1.37        | 20.59          | 1.35         | 8.01         | 9.85          | 19.96       | 22.26        |
| 65            | 52.59              | 0.40        | 0.04          | 1.19       | 0.05         | 1.51          | 0.75        | 14.42          | 1.03         | 10.96        | 12.40         | 13.42       | 18.27        |
| 70            | 39.28              | 0.41        | 0.08          | 0.44       | 0.29         | 2.73          | 0.45        | 12.40          | 1.08         | 16.94        | 18.25         | 10.82       | 21.21        |
| 74            | 34.07              | 0.47        | 0.15          | 0.72       | 0.60         | 5.03          | 1.18        | 12.48          | 1.30         | 31.36        | 32.66         | 10.11       | 34.19        |
| 80            | 25.49              | 0.27        | 0.06          | 0.07       | 0.23         | 4.86          | 0.46        | 5.59           | 0.82         | 27.62        | 28.06         | 5.62        | 28.61        |

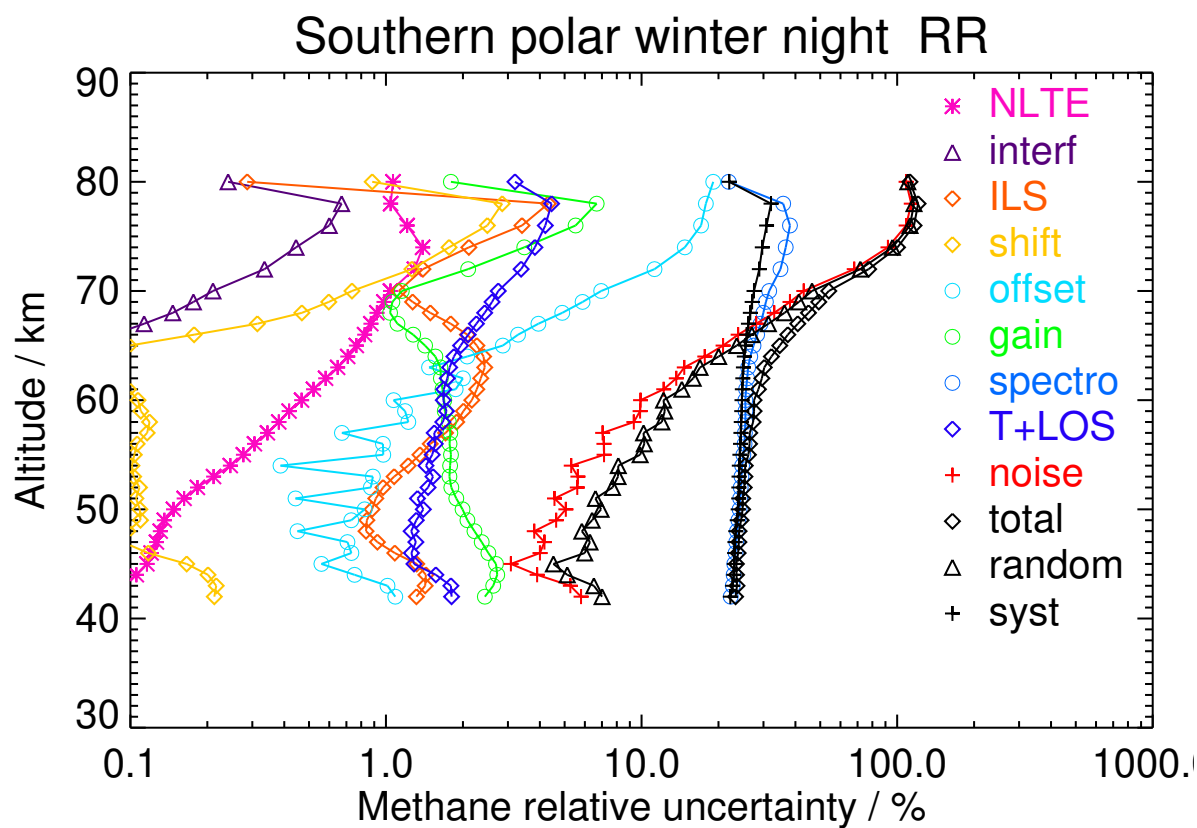

**Figure S130.** V8R\_CH4\_662 Southern polar winter night

**Table S131.** Methane error budget for Southern polar spring day. All uncertainties are  $1\sigma$ .

| altitude (km) | mean target (ppbv) | NLTE (ppbv) | interf (ppbv) | ILS (ppbv) | shift (ppbv) | offset (ppbv) | gain (ppbv) | spectro (ppbv) | T+LOS (ppbv) | noise (ppbv) | random (ppbv) | syst (ppbv) | total (ppbv) |
|---------------|--------------------|-------------|---------------|------------|--------------|---------------|-------------|----------------|--------------|--------------|---------------|-------------|--------------|
| 45            | 235.07             | 0.15        | 0.09          | 3.73       | 0.31         | 1.14          | 7.18        | 53.29          | 2.12         | 5.30         | 7.54          | 53.69       | 54.21        |
| 50            | 239.52             | 0.21        | 0.16          | 2.53       | 0.25         | 1.43          | 4.66        | 54.20          | 3.05         | 6.61         | 8.99          | 54.23       | 54.96        |
| 55            | 223.54             | 0.36        | 0.08          | 4.22       | 0.44         | 2.27          | 5.81        | 49.19          | 4.09         | 8.16         | 10.05         | 49.58       | 50.59        |
| 60            | 209.85             | 0.44        | 0.15          | 6.66       | 0.47         | 2.93          | 6.32        | 45.98          | 4.68         | 9.28         | 11.38         | 46.75       | 48.12        |
| 65            | 194.97             | 0.30        | 0.06          | 7.46       | 0.23         | 4.90          | 4.26        | 45.59          | 4.99         | 20.04        | 22.12         | 45.97       | 51.02        |
| 70            | 143.48             | 0.75        | 0.09          | 2.69       | 0.41         | 4.04          | 2.28        | 36.79          | 4.65         | 33.61        | 35.64         | 35.55       | 50.34        |
| 74            | 97.17              | 2.44        | 0.42          | 4.57       | 1.83         | 6.16          | 7.11        | 34.54          | 4.28         | 53.72        | 55.71         | 33.35       | 64.93        |
| 80            | 52.52              | 2.98        | 0.57          | 6.33       | 2.66         | 7.62          | 9.73        | 27.40          | 2.11         | 52.92        | 56.73         | 23.38       | 61.36        |
| 84            | 49.62              | 2.32        | 0.39          | 4.33       | 2.06         | 7.44          | 6.94        | 18.72          | 0.99         | 47.63        | 49.16         | 18.33       | 52.47        |

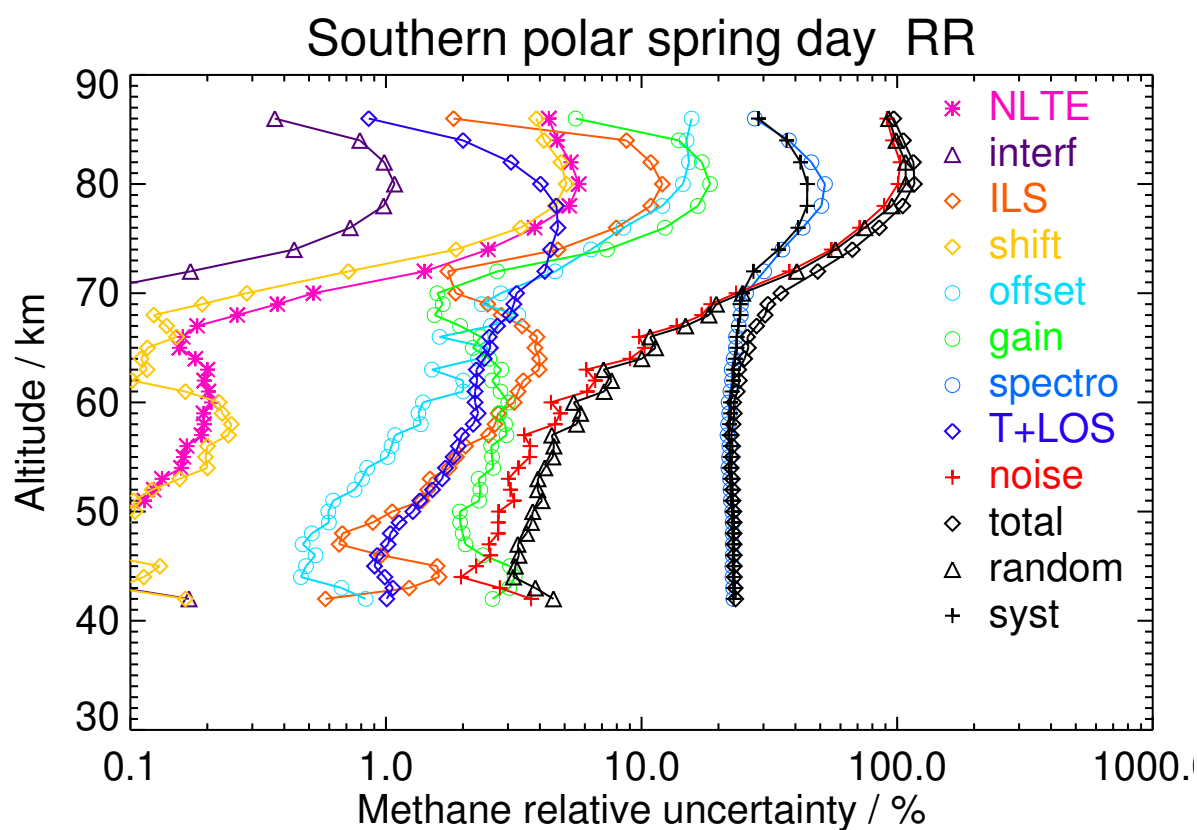

**Figure S131.** V8R\_CH4\_662 Southern polar spring day

**Table S132.** Methane error budget for Southern polar spring night. All uncertainties are  $1\sigma$ .

| altitude (km) | mean target (ppbv) | NLTE (ppbv) | interf (ppbv) | ILS (ppbv) | shift (ppbv) | offset (ppbv) | gain (ppbv) | spectro (ppbv) | T+LOS (ppbv) | noise (ppbv) | random (ppbv) | syst (ppbv) | total (ppbv) |
|---------------|--------------------|-------------|---------------|------------|--------------|---------------|-------------|----------------|--------------|--------------|---------------|-------------|--------------|
| 45            | 265.67             | 0.15        | 0.13          | 3.94       | 0.37         | 1.52          | 10.06       | 64.19          | 2.85         | 6.57         | 10.28         | 64.70       | 65.51        |
| 50            | 269.04             | 0.20        | 0.21          | 3.00       | 0.45         | 1.81          | 6.57        | 63.08          | 3.95         | 8.52         | 13.64         | 62.75       | 64.21        |
| 55            | 251.24             | 0.33        | 0.13          | 4.56       | 0.47         | 3.21          | 8.53        | 56.77          | 5.89         | 11.73        | 15.89         | 56.98       | 59.15        |
| 60            | 218.99             | 0.32        | 0.14          | 6.52       | 0.34         | 3.54          | 7.04        | 50.60          | 6.18         | 13.21        | 17.48         | 50.72       | 53.64        |
| 65            | 162.29             | 0.44        | 0.08          | 4.97       | 0.28         | 4.04          | 2.41        | 40.79          | 5.27         | 22.84        | 25.85         | 39.90       | 47.54        |
| 70            | 88.17              | 0.85        | 0.21          | 1.05       | 0.68         | 3.26          | 3.51        | 25.38          | 4.11         | 29.38        | 30.92         | 24.36       | 39.36        |
| 74            | 48.18              | 1.19        | 0.30          | 2.31       | 1.10         | 5.21          | 5.83        | 17.73          | 3.32         | 38.26        | 39.99         | 16.11       | 43.11        |
| 80            | 36.17              | 1.22        | 0.30          | 2.54       | 1.33         | 6.40          | 5.83        | 12.91          | 2.07         | 41.81        | 43.09         | 12.11       | 44.76        |

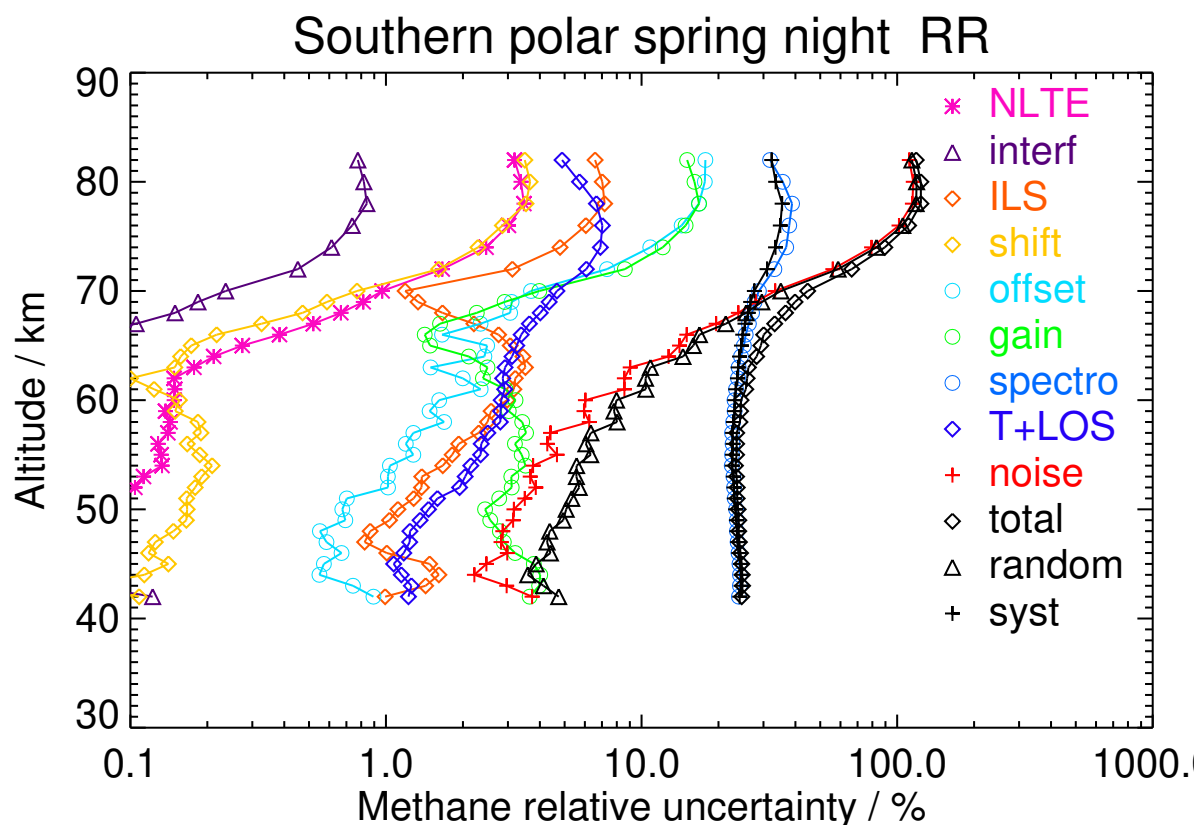

**Figure S132.** V8R\_CH4\_662 Southern polar spring night

**Table S133.** Methane error budget for Southern polar summer day. All uncertainties are  $1\sigma$ .

| altitude (km) | mean target (ppbv) | NLTE (ppbv) | interf (ppbv) | ILS (ppbv) | shift (ppbv) | offset (ppbv) | gain (ppbv) | spectro (ppbv) | T+LOS (ppbv) | noise (ppbv) | random (ppbv) | syst (ppbv) | total (ppbv) |
|---------------|--------------------|-------------|---------------|------------|--------------|---------------|-------------|----------------|--------------|--------------|---------------|-------------|--------------|
| 45            | 209.04             | 0.16        | 0.16          | 6.06       | 0.73         | 1.20          | 7.27        | 48.87          | 1.67         | 7.05         | 8.77          | 49.55       | 50.32        |
| 50            | 95.91              | 0.05        | 0.06          | 0.82       | 0.14         | 0.43          | 0.97        | 22.57          | 0.82         | 2.64         | 3.28          | 22.54       | 22.78        |
| 55            | 91.70              | 0.06        | 0.03          | 1.17       | 0.13         | 0.73          | 1.39        | 21.22          | 1.05         | 3.14         | 4.10          | 21.17       | 21.57        |
| 60            | 108.34             | 0.09        | 0.06          | 2.54       | 0.33         | 1.17          | 2.20        | 24.76          | 1.67         | 4.27         | 5.79          | 24.76       | 25.43        |
| 65            | 133.00             | 0.16        | 0.06          | 4.61       | 0.09         | 3.36          | 2.68        | 31.43          | 2.56         | 11.94        | 13.48         | 31.55       | 34.31        |
| 70            | 147.73             | 0.58        | 0.14          | 5.17       | 0.41         | 4.92          | 3.30        | 35.65          | 3.29         | 27.97        | 30.02         | 35.00       | 46.11        |
| 74            | 121.18             | 1.59        | 0.45          | 4.62       | 1.12         | 7.29          | 3.99        | 36.60          | 2.03         | 53.40        | 55.88         | 34.16       | 65.50        |
| 80            | 129.69             | 6.50        | 0.96          | 7.23       | 3.82         | 8.26          | 8.12        | 44.78          | 1.01         | 78.02        | 80.57         | 42.97       | 91.31        |
| 84            | 133.01             | 12.31       | 0.77          | 4.65       | 4.73         | 14.84         | 6.82        | 43.90          | 1.73         | 101.82       | 105.89        | 39.34       | 112.96       |

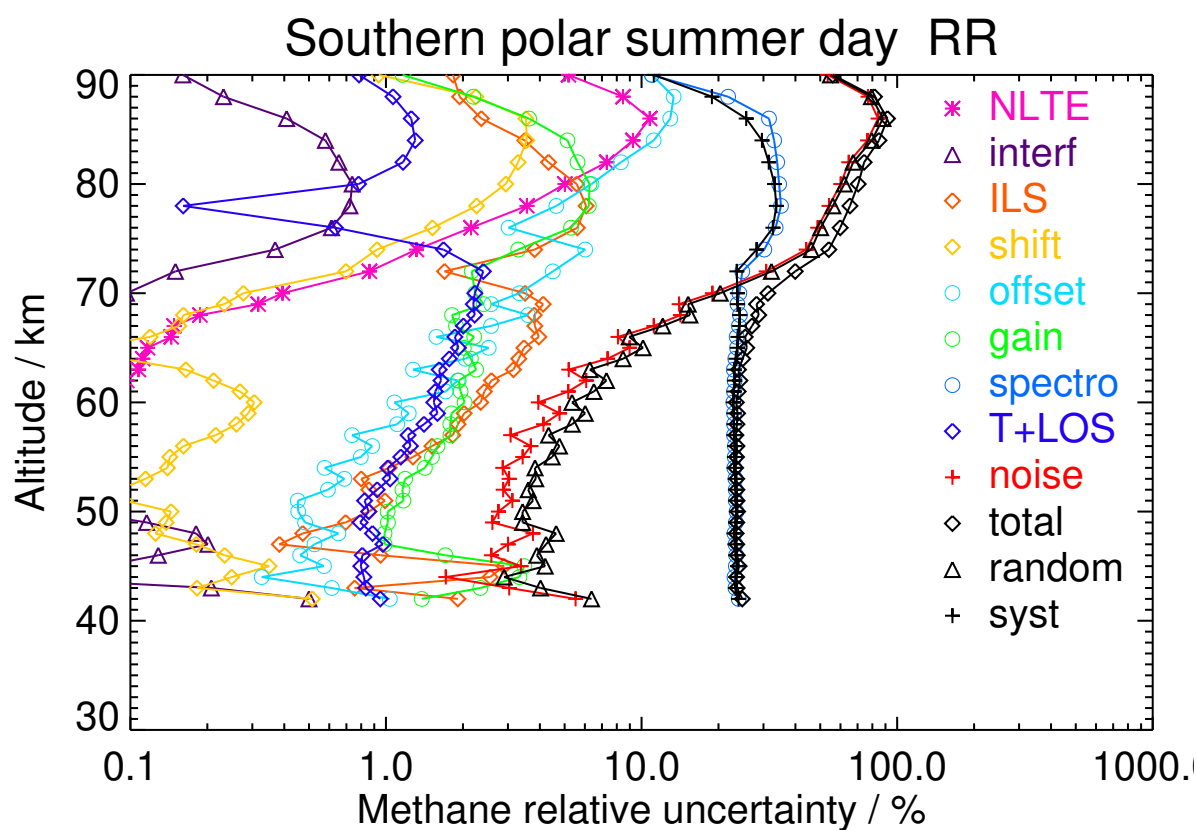

**Figure S133.** V8R\_CH4\_662 Southern polar summer day



**Table S134.** Methane error budget for Southern polar summer night. All uncertainties are  $1\sigma$ .

| altitude (km) | mean target (ppbv) | NLTE (ppbv) | interf (ppbv) | ILS (ppbv) | shift (ppbv) | offset (ppbv) | gain (ppbv) | spectro (ppbv) | T+LOS (ppbv) | noise (ppbv) | random (ppbv) | syst (ppbv) | total (ppbv) |
|---------------|--------------------|-------------|---------------|------------|--------------|---------------|-------------|----------------|--------------|--------------|---------------|-------------|--------------|
| 45            | 91.11              | 0.03        | 0.02          | 2.34       | 0.17         | 0.50          | 3.15        | 21.22          | 0.68         | 2.41         | 3.53          | 21.45       | 21.74        |
| 50            | 56.00              | 0.03        | <0.01         | 0.73       | 0.05         | 0.47          | 0.96        | 13.43          | 0.53         | 2.52         | 2.99          | 13.41       | 13.74        |
| 55            | 68.54              | 0.05        | 0.02          | 0.78       | 0.08         | 0.74          | 1.13        | 16.69          | 0.96         | 4.02         | 6.02          | 16.19       | 17.27        |
| 60            | 89.42              | 0.12        | 0.06          | 2.06       | 0.09         | 1.23          | 1.76        | 23.01          | 1.68         | 6.58         | 11.46         | 21.28       | 24.17        |
| 65            | 144.01             | 0.15        | 0.04          | 4.59       | 0.15         | 3.95          | 2.41        | 35.76          | 3.82         | 18.67        | 22.34         | 34.43       | 41.04        |
| 70            | 124.91             | 0.43        | 0.19          | 1.55       | 0.36         | 3.23          | 0.98        | 31.91          | 4.53         | 33.71        | 34.74         | 31.34       | 46.79        |
| 74            | 104.81             | 1.75        | 0.80          | 3.40       | 1.68         | 6.67          | 4.97        | 33.92          | 3.72         | 60.23        | 62.43         | 31.32       | 69.85        |
| 80            | 94.29              | 6.09        | 1.02          | 3.74       | 2.38         | 11.82         | 6.35        | 38.27          | 0.64         | 83.50        | 88.77         | 28.20       | 93.14        |
| 84            | 108.54             | 7.77        | 1.01          | 3.85       | 2.40         | 15.93         | 6.59        | 36.38          | 0.11         | 103.19       | 107.43        | 28.44       | 111.13       |

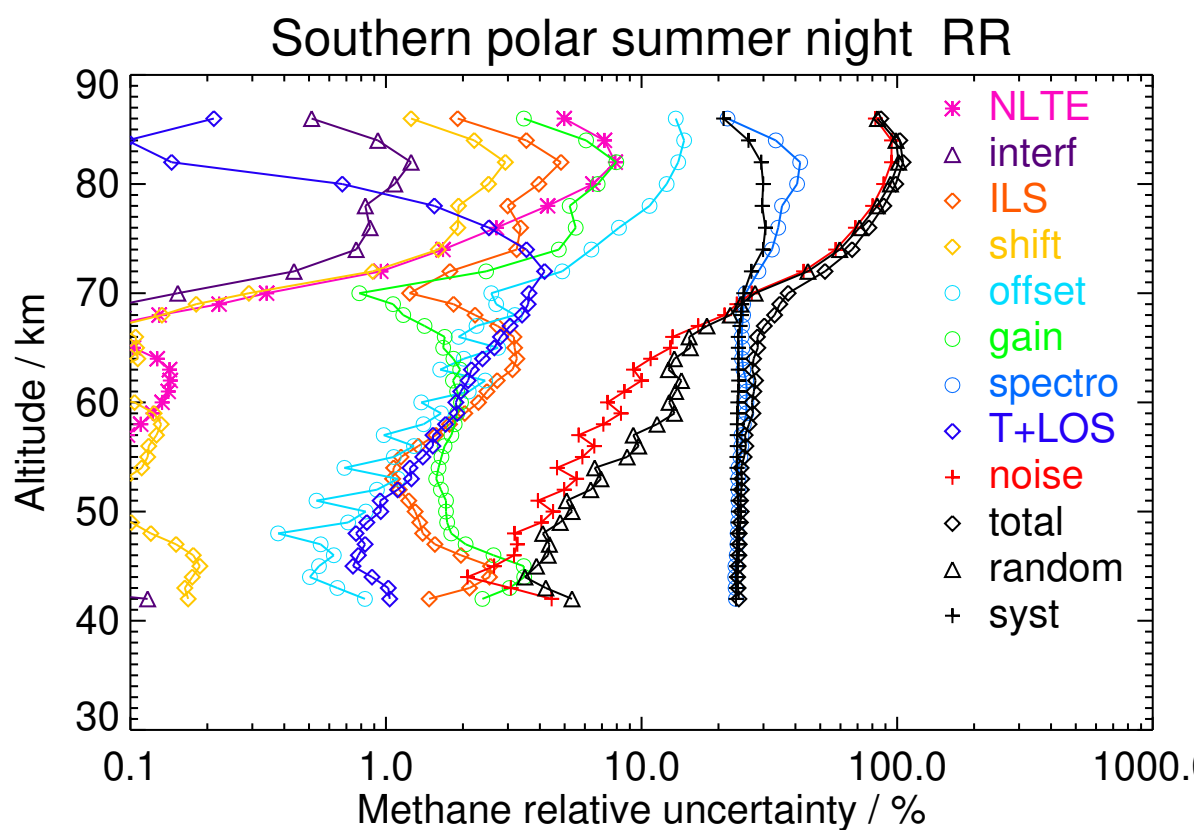

**Figure S134.** V8R\_CH4\_662 Southern polar summer night

**Table S135.** Methane error budget for Southern polar autumn day. All uncertainties are  $1\sigma$ .

| altitude (km) | mean target (ppbv) | NLTE (ppbv) | interf (ppbv) | ILS (ppbv) | shift (ppbv) | offset (ppbv) | gain (ppbv) | spectro (ppbv) | T+LOS (ppbv) | noise (ppbv) | random (ppbv) | syst (ppbv) | total (ppbv) |
|---------------|--------------------|-------------|---------------|------------|--------------|---------------|-------------|----------------|--------------|--------------|---------------|-------------|--------------|
| 45            | 86.86              | 0.08        | 0.03          | 0.92       | 0.15         | 0.81          | 2.61        | 21.30          | 1.46         | 5.12         | 9.81          | 19.85       | 22.14        |
| 50            | 153.56             | 0.22        | 0.04          | 1.10       | 0.18         | 1.49          | 3.03        | 35.68          | 2.57         | 8.14         | 11.86         | 34.90       | 36.86        |
| 55            | 197.39             | 0.48        | 0.04          | 2.26       | 0.23         | 1.54          | 3.64        | 45.28          | 3.62         | 9.55         | 12.45         | 44.95       | 46.64        |
| 60            | 146.68             | 0.55        | 0.03          | 3.32       | 0.11         | 1.61          | 2.70        | 35.50          | 3.11         | 10.78        | 15.39         | 34.21       | 37.52        |
| 65            | 85.45              | 0.37        | 0.04          | 2.28       | 0.08         | 2.20          | 1.13        | 22.74          | 2.08         | 15.37        | 17.57         | 21.45       | 27.73        |
| 70            | 43.69              | 0.19        | 0.06          | 0.72       | 0.18         | 2.71          | 0.37        | 13.14          | 1.29         | 18.20        | 19.13         | 12.17       | 22.67        |
| 74            | 37.90              | 0.34        | 0.11          | 0.46       | 0.43         | 4.64          | 0.80        | 18.88          | 1.56         | 29.04        | 33.03         | 11.57       | 35.00        |
| 80            | 50.94              | 0.18        | 0.15          | 0.30       | 0.62         | 8.22          | 1.53        | 19.88          | 1.94         | 51.06        | 53.14         | 15.91       | 55.47        |

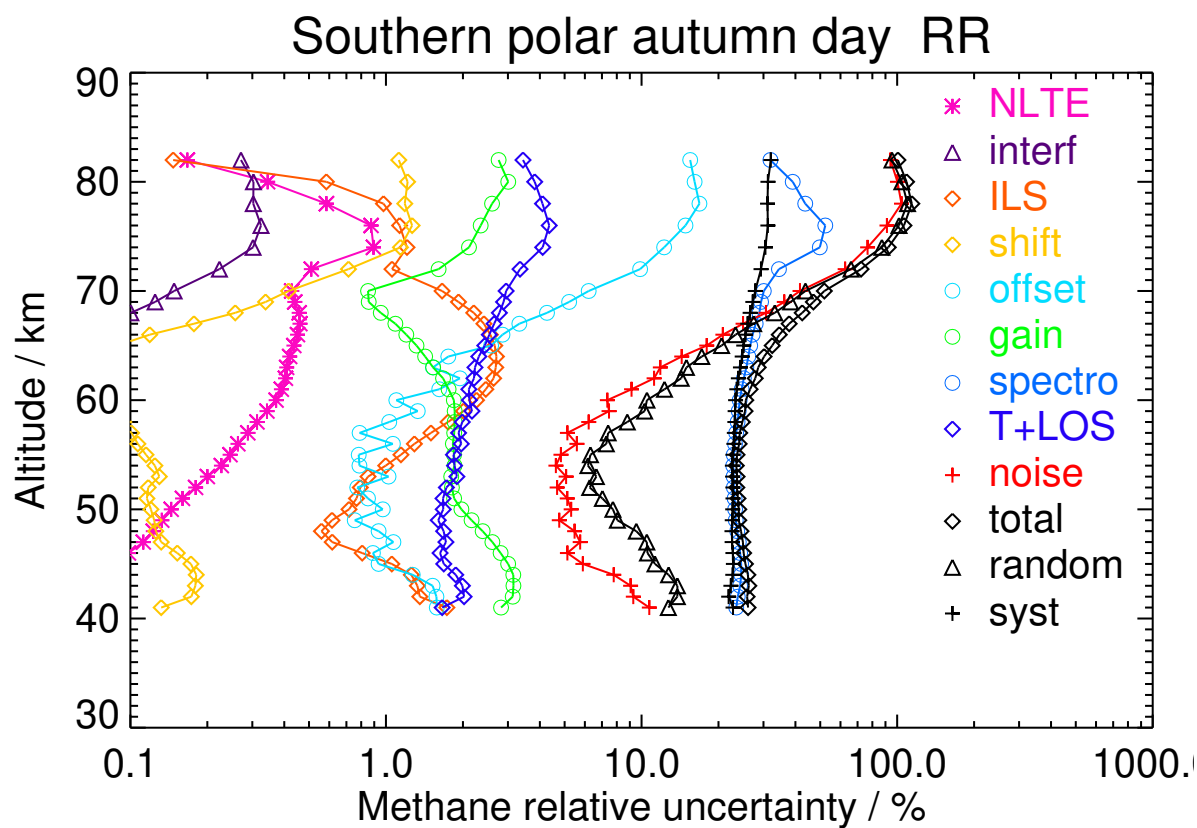

**Figure S135.** V8R\_CH4\_662 Southern polar autumn day

**Table S136.** Methane error budget for Southern polar autumn night. All uncertainties are  $1\sigma$ .

| altitude<br>(km) | mean target<br>(ppbv) | NLTE<br>(ppbv) | interf<br>(ppbv) | ILS<br>(ppbv) | shift<br>(ppbv) | offset<br>(ppbv) | gain<br>(ppbv) | spectro<br>(ppbv) | T+LOS<br>(ppbv) | noise<br>(ppbv) | random<br>(ppbv) | syst<br>(ppbv) | total<br>(ppbv) |
|------------------|-----------------------|----------------|------------------|---------------|-----------------|------------------|----------------|-------------------|-----------------|-----------------|------------------|----------------|-----------------|
| 45               | 110.90                | 0.09           | 0.03             | 0.90          | 0.20            | 1.03             | 3.16           | 26.05             | 2.14            | 5.57            | 8.27             | 25.65          | 26.95           |
| 50               | 192.20                | 0.24           | 0.03             | 1.80          | 0.20            | 1.88             | 4.25           | 44.68             | 3.38            | 9.73            | 11.50            | 44.66          | 46.12           |
| 55               | 148.04                | 0.31           | 0.02             | 1.96          | 0.12            | 1.11             | 2.81           | 35.89             | 2.71            | 8.46            | 10.79            | 35.55          | 37.15           |
| 60               | 76.19                 | 0.27           | 0.01             | 1.69          | 0.05            | 0.78             | 1.40           | 20.16             | 1.60            | 7.38            | 10.40            | 19.00          | 21.66           |
| 65               | 39.52                 | 0.20           | 0.04             | 1.05          | 0.06            | 1.45             | 0.48           | 11.70             | 0.91            | 9.46            | 11.34            | 10.11          | 15.19           |
| 70               | 20.58                 | 0.10           | 0.05             | 0.34          | 0.10            | 1.80             | 0.21           | 6.13              | 0.59            | 10.16           | 10.70            | 5.49           | 12.03           |
| 74               | 22.26                 | 0.15           | 0.08             | 0.12          | 0.22            | 3.81             | 0.69           | 7.02              | 0.81            | 21.46           | 22.13            | 5.98           | 22.93           |
| 80               | 23.09                 | 0.17           | 0.07             | 0.08          | 0.21            | 4.96             | 0.74           | 5.19              | 0.73            | 26.20           | 26.73            | 4.99           | 27.19           |

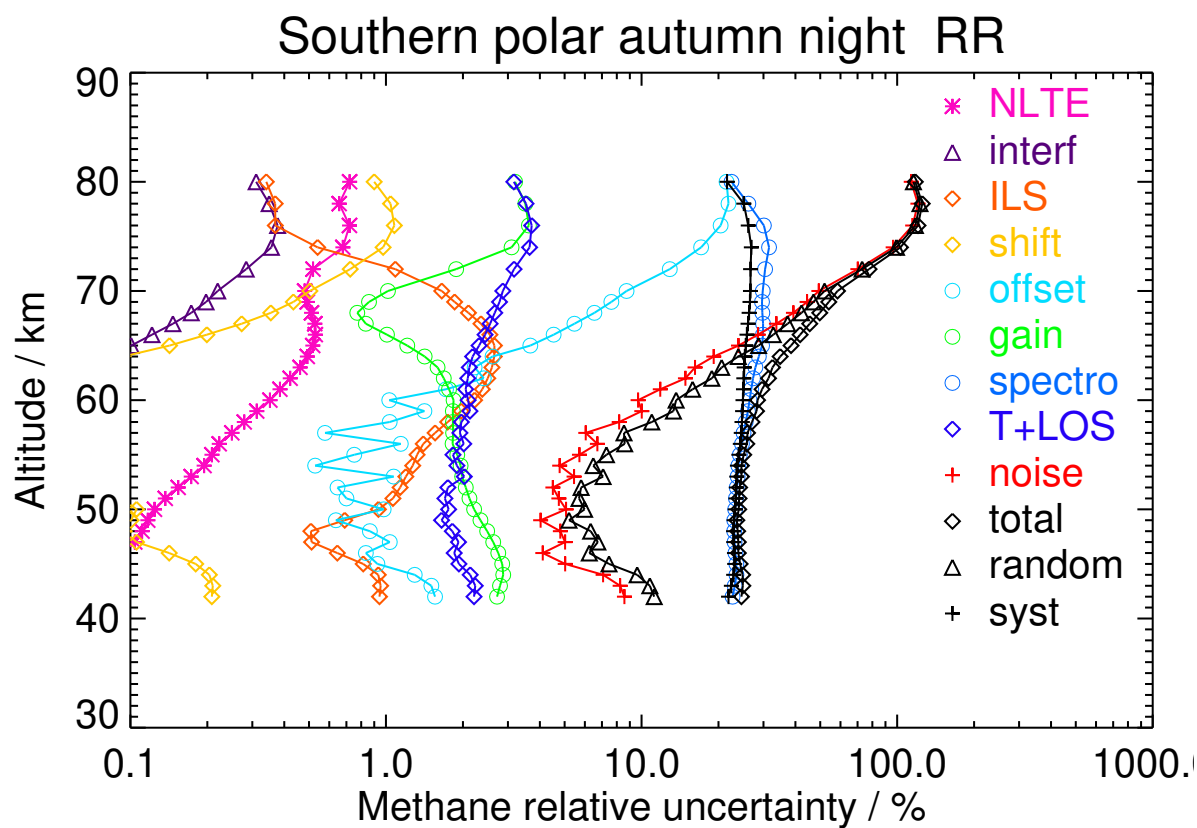

**Figure S136.** V8R\_CH4\_662 Southern polar autumn night

**Table S137.** Nitrous oxide error budget for Northern polar winter day. All uncertainties are  $1\sigma$ .

| altitude<br>(km) | mean target<br>(ppbv) | interf<br>(ppbv) | ILS<br>(ppbv) | shift<br>(ppbv) | offset<br>(ppbv) | gain<br>(ppbv) | spectro<br>(ppbv) | T+LOS<br>(ppbv) | noise<br>(ppbv) | random<br>(ppbv) | syst<br>(ppbv) | total<br>(ppbv) |
|------------------|-----------------------|------------------|---------------|-----------------|------------------|----------------|-------------------|-----------------|-----------------|------------------|----------------|-----------------|
| 9                | 312.880               | 3.296            | 1.612         | 0.195           | 3.012            | 10.988         | 12.356            | 4.422           | 7.543           | 11.920           | 15.177         | 19.298          |
| 12               | 290.010               | 1.314            | 2.959         | 0.290           | 1.917            | 9.329          | 12.332            | 3.650           | 5.437           | 9.454            | 14.382         | 17.211          |
| 15               | 258.678               | 1.211            | 6.022         | 0.540           | 1.850            | 11.626         | 14.844            | 5.190           | 5.150           | 12.099           | 17.436         | 21.223          |
| 18               | 192.909               | 0.420            | 8.923         | 0.909           | 1.656            | 14.035         | 16.804            | 4.581           | 3.928           | 16.238           | 18.316         | 24.478          |
| 21               | 126.654               | 0.240            | 5.085         | 1.205           | 1.915            | 14.174         | 14.739            | 3.617           | 3.489           | 15.171           | 15.630         | 21.781          |
| 24               | 104.551               | 0.144            | 2.868         | 0.870           | 1.469            | 9.740          | 11.034            | 2.117           | 2.937           | 11.077           | 10.871         | 15.520          |
| 27               | 88.617                | 0.134            | 1.204         | 0.390           | 0.875            | 4.590          | 9.613             | 1.628           | 2.568           | 7.239            | 8.527          | 11.185          |
| 30               | 66.754                | 0.064            | 1.119         | 0.214           | 0.500            | 2.360          | 9.188             | 1.441           | 1.879           | 5.639            | 8.084          | 9.857           |
| 33               | 30.870                | 0.035            | 1.307         | 0.129           | 0.292            | 1.318          | 5.645             | 0.766           | 1.350           | 4.174            | 4.517          | 6.150           |
| 36               | 14.531                | 0.021            | 0.585         | 0.044           | 0.204            | 0.900          | 1.988             | 0.300           | 1.008           | 1.919            | 1.604          | 2.501           |
| 39               | 12.705                | 0.017            | 0.440         | 0.063           | 0.175            | 0.922          | 0.896             | 0.190           | 0.814           | 1.156            | 1.114          | 1.606           |
| 42               | 11.624                | 0.013            | 0.244         | 0.057           | 0.147            | 0.849          | 0.738             | 0.140           | 0.616           | 0.934            | 0.935          | 1.322           |
| 45               | 8.745                 | 0.014            | 0.163         | 0.043           | 0.108            | 0.674          | 0.619             | 0.127           | 0.584           | 0.866            | 0.696          | 1.111           |
| 48               | 5.476                 | 0.007            | 0.126         | 0.023           | 0.101            | 0.293          | 0.535             | 0.081           | 0.681           | 0.788            | 0.497          | 0.932           |
| 52               | 2.121                 | 0.004            | 0.085         | 0.014           | 0.099            | 0.120          | 0.279             | 0.046           | 0.775           | 0.808            | 0.244          | 0.844           |
| 56               | 0.955                 | 0.007            | 0.077         | 0.015           | 0.090            | 0.098          | 0.151             | 0.043           | 0.777           | 0.800            | 0.110          | 0.807           |
| 60               | 0.760                 | 0.008            | 0.043         | 0.012           | 0.228            | 0.124          | 0.082             | 0.030           | 1.578           | 1.601            | 0.065          | 1.602           |
| 64               | 0.467                 | 0.018            | 0.104         | 0.028           | 0.255            | 0.264          | 0.152             | 0.040           | 1.646           | 1.690            | 0.153          | 1.697           |
| 68               | 0.427                 | 0.019            | 0.104         | 0.034           | 0.287            | 0.323          | 0.163             | 0.043           | 1.724           | 1.778            | 0.199          | 1.789           |

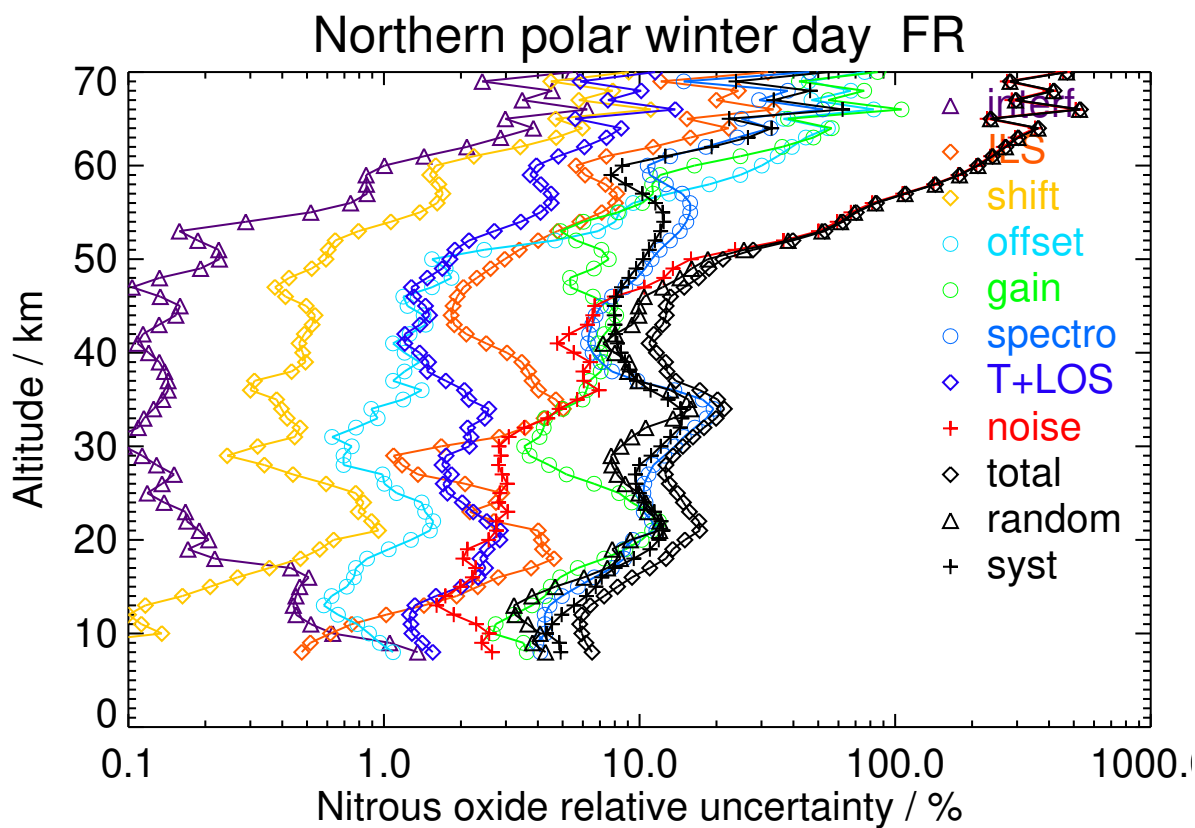

**Figure S137.** V8H\_N2O\_61 Northern polar winter day

**Table S138.** Nitrous oxide error budget for Northern polar winter night. All uncertainties are  $1\sigma$ .

| altitude<br>(km) | mean target<br>(ppbv) | interf<br>(ppbv) | ILS<br>(ppbv) | shift<br>(ppbv) | offset<br>(ppbv) | gain<br>(ppbv) | spectro<br>(ppbv) | T+LOS<br>(ppbv) | noise<br>(ppbv) | random<br>(ppbv) | syst<br>(ppbv) | total<br>(ppbv) |
|------------------|-----------------------|------------------|---------------|-----------------|------------------|----------------|-------------------|-----------------|-----------------|------------------|----------------|-----------------|
| 9                | 309.645               | 2.551            | 2.662         | 0.283           | 2.742            | 10.322         | 11.952            | 4.063           | 7.118           | 10.560           | 15.042         | 18.378          |
| 12               | 293.314               | 2.007            | 6.192         | 0.402           | 2.218            | 12.485         | 12.044            | 4.641           | 5.915           | 11.618           | 16.430         | 20.123          |
| 15               | 251.690               | 2.275            | 7.387         | 0.431           | 2.111            | 11.106         | 12.543            | 5.796           | 6.109           | 11.992           | 16.497         | 20.395          |
| 18               | 173.913               | 0.923            | 7.713         | 0.783           | 1.489            | 9.980          | 15.847            | 5.535           | 4.364           | 14.855           | 15.586         | 21.531          |
| 21               | 96.821                | 0.350            | 5.623         | 0.858           | 1.298            | 8.206          | 14.090            | 2.968           | 3.790           | 12.738           | 12.686         | 17.978          |
| 24               | 78.012                | 0.127            | 4.489         | 0.777           | 0.946            | 4.202          | 11.035            | 1.826           | 3.094           | 11.276           | 6.845          | 13.191          |
| 27               | 72.577                | 0.140            | 1.678         | 0.354           | 0.651            | 2.444          | 10.193            | 1.326           | 2.385           | 8.431            | 7.044          | 10.986          |
| 30               | 46.883                | 0.081            | 0.780         | 0.122           | 0.375            | 1.520          | 7.473             | 1.026           | 1.490           | 5.727            | 5.421          | 7.886           |
| 33               | 23.018                | 0.034            | 1.089         | 0.102           | 0.236            | 1.279          | 3.728             | 0.488           | 0.930           | 3.124            | 2.852          | 4.230           |
| 36               | 10.334                | 0.022            | 0.466         | 0.024           | 0.118            | 0.617          | 1.465             | 0.192           | 0.628           | 1.333            | 1.190          | 1.786           |
| 39               | 6.590                 | 0.012            | 0.195         | 0.023           | 0.086            | 0.350          | 0.433             | 0.087           | 0.481           | 0.606            | 0.476          | 0.771           |
| 42               | 6.925                 | 0.011            | 0.136         | 0.019           | 0.066            | 0.338          | 0.424             | 0.066           | 0.359           | 0.540            | 0.399          | 0.671           |
| 45               | 6.429                 | 0.018            | 0.146         | 0.027           | 0.069            | 0.405          | 0.391             | 0.083           | 0.400           | 0.625            | 0.348          | 0.715           |
| 48               | 5.162                 | 0.009            | 0.128         | 0.021           | 0.083            | 0.325          | 0.417             | 0.057           | 0.516           | 0.675            | 0.342          | 0.757           |
| 52               | 2.654                 | 0.014            | 0.200         | 0.025           | 0.092            | 0.249          | 0.381             | 0.058           | 0.663           | 0.761            | 0.346          | 0.836           |
| 56               | 0.588                 | 0.039            | 0.232         | 0.054           | 0.126            | 0.457          | 0.301             | 0.087           | 0.760           | 0.927            | 0.318          | 0.980           |
| 60               | -0.010                | 0.055            | 0.387         | 0.075           | 0.276            | 0.724          | 0.449             | 0.119           | 1.732           | 1.912            | 0.568          | 1.994           |
| 64               | -0.426                | 0.063            | 0.491         | 0.066           | 0.282            | 0.918          | 0.567             | 0.102           | 1.699           | 1.981            | 0.680          | 2.095           |
| 68               | 0.343                 | 0.033            | 0.116         | 0.047           | 0.250            | 0.239          | 0.167             | 0.053           | 1.578           | 1.620            | 0.185          | 1.630           |

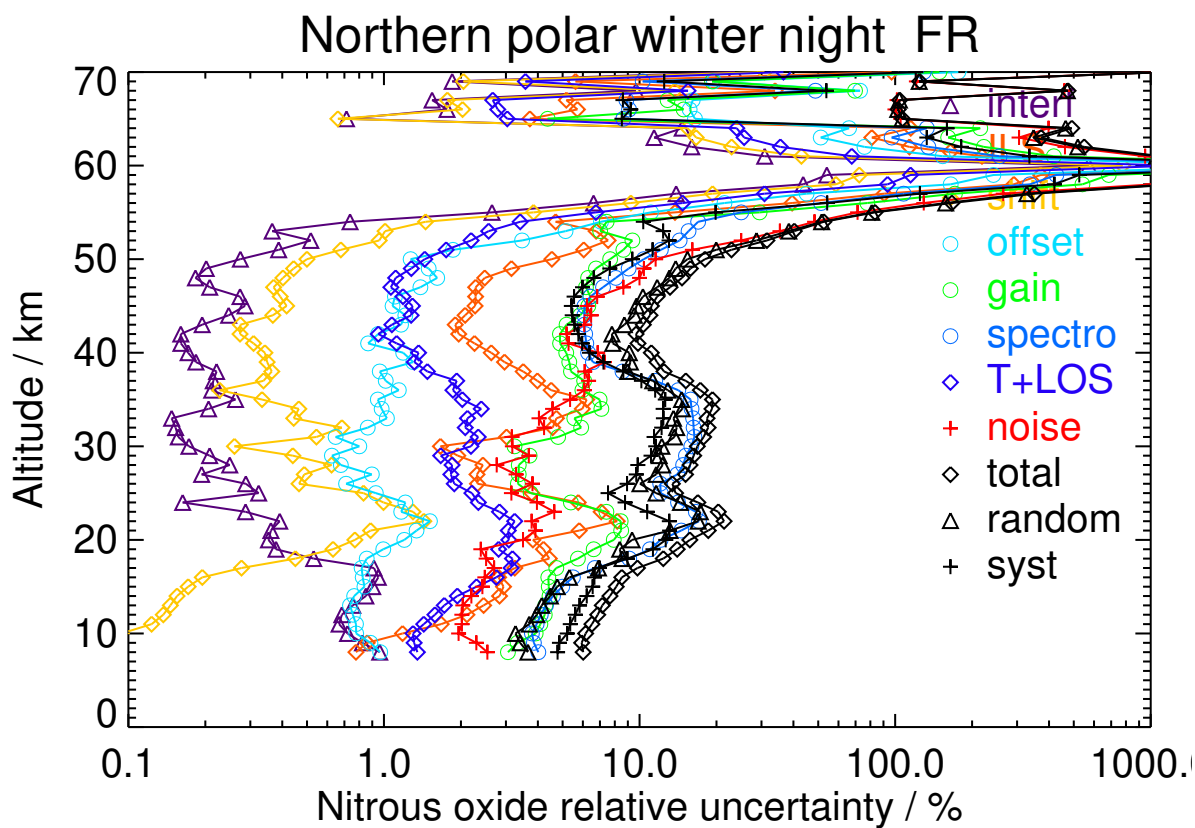

**Figure S138.** V8H\_N2O\_61 Northern polar winter night

**Table S139.** Nitrous oxide error budget for Northern polar spring day. All uncertainties are  $1\sigma$ .

| altitude<br>(km) | mean target<br>(ppbv) | interf<br>(ppbv) | ILS<br>(ppbv) | shift<br>(ppbv) | offset<br>(ppbv) | gain<br>(ppbv) | spectro<br>(ppbv) | T+LOS<br>(ppbv) | noise<br>(ppbv) | random<br>(ppbv) | syst<br>(ppbv) | total<br>(ppbv) |
|------------------|-----------------------|------------------|---------------|-----------------|------------------|----------------|-------------------|-----------------|-----------------|------------------|----------------|-----------------|
| 9                | 275.448               | 1.830            | 0.433         | 0.465           | 2.401            | 4.531          | 11.871            | 3.240           | 7.547           | 9.116            | 12.462         | 15.441          |
| 12               | 275.867               | 0.754            | 3.050         | 0.197           | 1.572            | 11.159         | 12.531            | 3.560           | 4.262           | 7.754            | 16.268         | 18.022          |
| 15               | 197.194               | 0.616            | 4.131         | 0.273           | 1.402            | 7.173          | 16.111            | 5.060           | 4.643           | 10.600           | 16.288         | 19.434          |
| 18               | 119.686               | 0.120            | 4.159         | 0.341           | 1.014            | 7.021          | 11.628            | 3.246           | 3.072           | 9.872            | 11.202         | 14.931          |
| 21               | 93.213                | 0.155            | 5.405         | 1.068           | 1.181            | 8.182          | 11.381            | 2.361           | 3.018           | 11.583           | 10.429         | 15.586          |
| 24               | 98.567                | 0.123            | 4.423         | 0.823           | 0.800            | 5.160          | 10.242            | 1.861           | 2.872           | 9.539            | 8.553          | 12.812          |
| 27               | 83.709                | 0.081            | 1.261         | 0.422           | 0.455            | 2.275          | 9.535             | 1.383           | 2.433           | 6.209            | 8.207          | 10.291          |
| 30               | 57.504                | 0.051            | 0.949         | 0.201           | 0.266            | 1.093          | 6.260             | 1.053           | 1.708           | 3.921            | 5.482          | 6.740           |
| 33               | 45.182                | 0.038            | 0.880         | 0.303           | 0.280            | 1.829          | 3.766             | 0.665           | 1.171           | 2.696            | 3.608          | 4.504           |
| 36               | 31.170                | 0.035            | 1.229         | 0.204           | 0.238            | 1.935          | 3.071             | 0.428           | 0.810           | 1.944            | 3.442          | 3.953           |
| 39               | 15.752                | 0.019            | 0.904         | 0.130           | 0.135            | 1.159          | 1.757             | 0.257           | 0.543           | 1.475            | 1.861          | 2.375           |
| 42               | 8.018                 | 0.009            | 0.535         | 0.065           | 0.074            | 0.588          | 0.909             | 0.117           | 0.333           | 0.913            | 0.871          | 1.262           |
| 45               | 4.345                 | 0.014            | 0.334         | 0.039           | 0.047            | 0.346          | 0.506             | 0.072           | 0.279           | 0.517            | 0.554          | 0.758           |
| 48               | 1.892                 | 0.005            | 0.052         | 0.022           | 0.034            | 0.077          | 0.199             | 0.043           | 0.252           | 0.296            | 0.167          | 0.340           |
| 52               | 0.725                 | 0.003            | 0.026         | 0.006           | 0.054            | 0.026          | 0.063             | 0.015           | 0.331           | 0.342            | 0.036          | 0.344           |
| 56               | 0.810                 | 0.011            | 0.165         | 0.038           | 0.063            | 0.168          | 0.137             | 0.033           | 0.479           | 0.510            | 0.226          | 0.558           |
| 60               | 0.384                 | 0.003            | 0.036         | 0.012           | 0.115            | 0.029          | 0.066             | 0.014           | 0.779           | 0.789            | 0.053          | 0.791           |
| 64               | -0.572                | 0.025            | 0.184         | 0.043           | 0.210            | 0.268          | 0.287             | 0.044           | 1.238           | 1.280            | 0.362          | 1.330           |
| 68               | -0.540                | 0.029            | 0.220         | 0.053           | 0.307            | 0.289          | 0.330             | 0.046           | 1.735           | 1.784            | 0.410          | 1.831           |

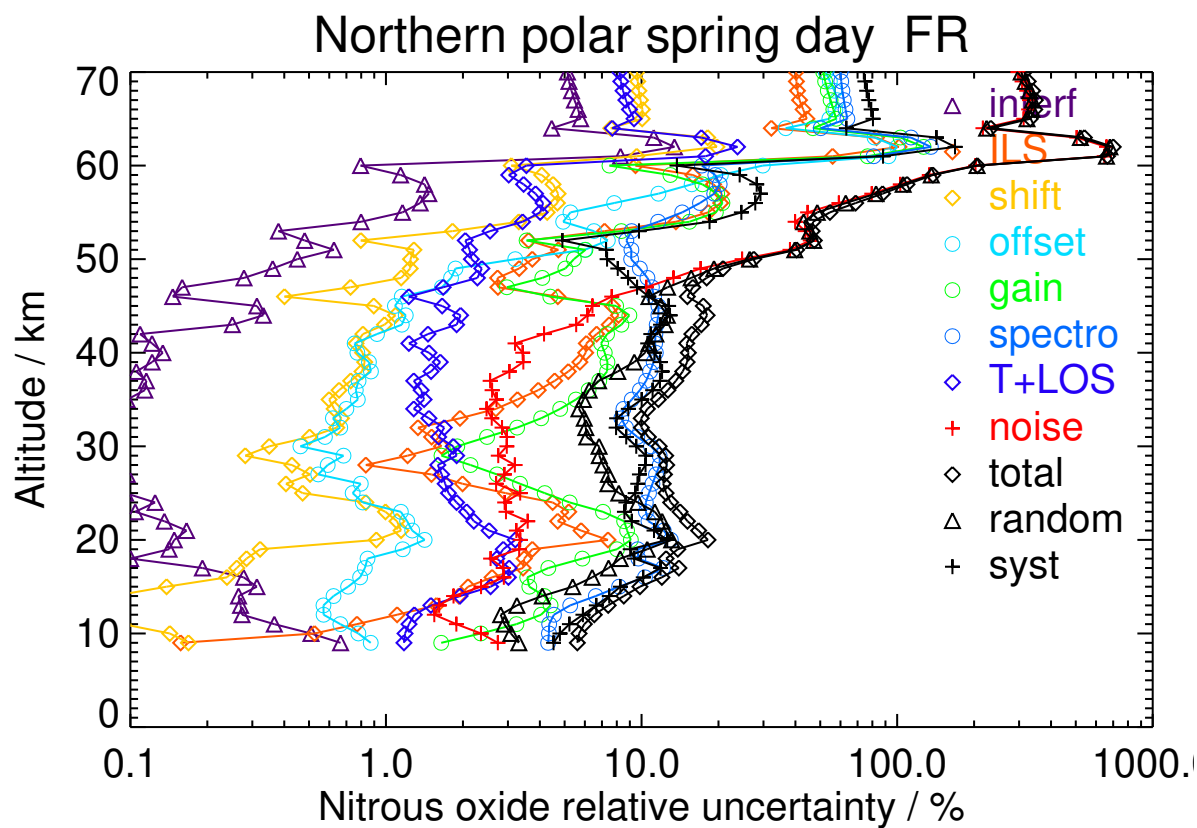

**Figure S139.** V8H\_N2O\_61 Northern polar spring day

**Table S140.** Nitrous oxide error budget for Northern polar spring night. All uncertainties are  $1\sigma$ .

| altitude<br>(km) | mean target<br>(ppbv) | interf<br>(ppbv) | ILS<br>(ppbv) | shift<br>(ppbv) | offset<br>(ppbv) | gain<br>(ppbv) | spectro<br>(ppbv) | T+LOS<br>(ppbv) | noise<br>(ppbv) | random<br>(ppbv) | syst<br>(ppbv) | total<br>(ppbv) |
|------------------|-----------------------|------------------|---------------|-----------------|------------------|----------------|-------------------|-----------------|-----------------|------------------|----------------|-----------------|
| 9                | 277.346               | 2.109            | 1.342         | 0.410           | 2.448            | 5.831          | 13.001            | 3.524           | 7.763           | 10.729           | 13.154         | 16.974          |
| 12               | 274.631               | 0.835            | 2.858         | 0.206           | 1.619            | 10.583         | 12.341            | 3.623           | 4.665           | 8.433            | 15.478         | 17.627          |
| 15               | 219.047               | 0.676            | 4.712         | 0.331           | 1.642            | 9.604          | 15.930            | 5.424           | 5.271           | 12.842           | 16.241         | 20.705          |
| 18               | 149.624               | 0.170            | 5.366         | 0.431           | 1.437            | 10.113         | 14.794            | 3.851           | 3.573           | 12.976           | 14.541         | 19.489          |
| 21               | 109.399               | 0.155            | 6.101         | 1.439           | 1.162            | 7.879          | 14.137            | 2.544           | 2.919           | 13.496           | 11.639         | 17.821          |
| 24               | 112.750               | 0.102            | 3.553         | 0.764           | 0.923            | 6.285          | 10.823            | 1.887           | 2.739           | 9.589            | 9.478          | 13.482          |
| 27               | 92.163                | 0.076            | 1.443         | 0.385           | 0.547            | 2.318          | 11.137            | 1.515           | 2.369           | 6.978            | 9.548          | 11.826          |
| 30               | 64.177                | 0.052            | 0.755         | 0.220           | 0.289            | 1.034          | 7.008             | 1.229           | 1.701           | 4.023            | 6.254          | 7.436           |
| 33               | 44.138                | 0.041            | 0.848         | 0.309           | 0.264            | 1.720          | 4.330             | 0.775           | 1.197           | 2.760            | 4.124          | 4.962           |
| 36               | 24.991                | 0.033            | 1.090         | 0.204           | 0.238            | 1.822          | 2.787             | 0.423           | 0.794           | 2.182            | 2.902          | 3.631           |
| 39               | 13.128                | 0.017            | 0.762         | 0.128           | 0.138            | 1.080          | 1.515             | 0.226           | 0.518           | 1.421            | 1.541          | 2.096           |
| 42               | 6.029                 | 0.007            | 0.325         | 0.050           | 0.056            | 0.369          | 0.714             | 0.098           | 0.296           | 0.679            | 0.627          | 0.924           |
| 45               | 3.012                 | 0.012            | 0.214         | 0.028           | 0.035            | 0.196          | 0.355             | 0.060           | 0.266           | 0.397            | 0.359          | 0.535           |
| 48               | 1.590                 | 0.005            | 0.057         | 0.018           | 0.035            | 0.077          | 0.153             | 0.035           | 0.249           | 0.288            | 0.119          | 0.312           |
| 52               | 0.763                 | 0.004            | 0.032         | 0.008           | 0.055            | 0.031          | 0.069             | 0.015           | 0.343           | 0.355            | 0.038          | 0.357           |
| 56               | 0.834                 | 0.011            | 0.157         | 0.042           | 0.068            | 0.170          | 0.132             | 0.041           | 0.496           | 0.535            | 0.197          | 0.570           |
| 60               | 0.420                 | 0.003            | 0.031         | 0.010           | 0.125            | 0.033          | 0.076             | 0.016           | 0.859           | 0.871            | 0.055          | 0.873           |
| 64               | -0.481                | 0.025            | 0.155         | 0.047           | 0.208            | 0.271          | 0.244             | 0.049           | 1.226           | 1.266            | 0.325          | 1.307           |
| 68               | -0.465                | 0.026            | 0.170         | 0.053           | 0.306            | 0.277          | 0.261             | 0.046           | 1.712           | 1.761            | 0.319          | 1.790           |

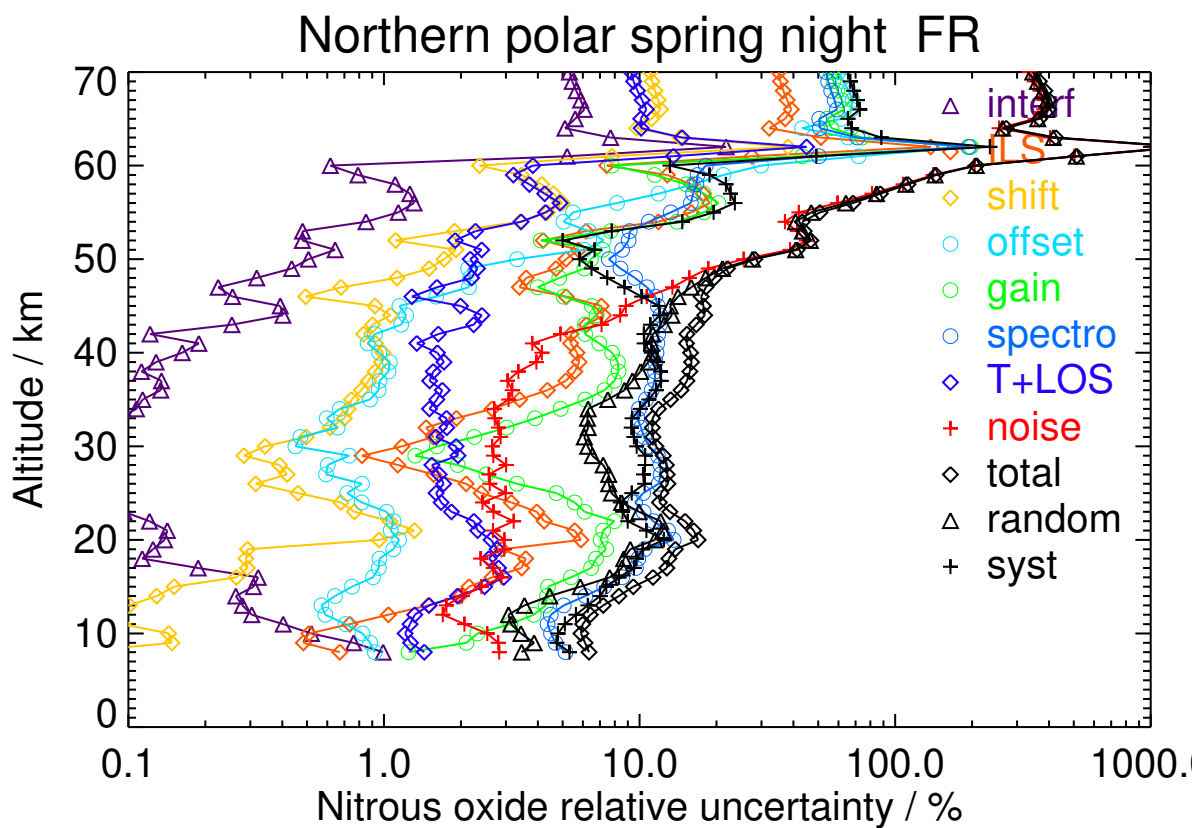

**Figure S140.** V8H\_N2O\_61 Northern polar spring night

**Table S141.** Nitrous oxide error budget for Northern polar summer day. All uncertainties are  $1\sigma$ .

| altitude (km) | mean target (ppbv) | interf (ppbv) | ILS (ppbv) | shift (ppbv) | offset (ppbv) | gain (ppbv) | spectro (ppbv) | T+LOS (ppbv) | noise (ppbv) | random (ppbv) | syst (ppbv) | total (ppbv) |
|---------------|--------------------|---------------|------------|--------------|---------------|-------------|----------------|--------------|--------------|---------------|-------------|--------------|
| 12            | 307.827            | 0.877         | 3.728      | 0.409        | 1.774         | 10.696      | 14.073         | 3.492        | 5.302        | 9.159         | 16.937      | 19.255       |
| 15            | 308.220            | 0.632         | 10.425     | 0.512        | 1.961         | 19.028      | 14.478         | 5.262        | 4.851        | 10.870        | 24.857      | 27.130       |
| 18            | 254.200            | 0.209         | 8.220      | 0.555        | 1.964         | 18.725      | 17.873         | 4.849        | 4.180        | 14.554        | 23.896      | 27.980       |
| 21            | 193.102            | 0.143         | 7.204      | 1.412        | 2.115         | 18.645      | 18.911         | 4.491        | 3.474        | 16.546        | 22.850      | 28.212       |
| 24            | 152.172            | 0.109         | 3.385      | 0.638        | 1.219         | 9.017       | 15.095         | 2.854        | 3.075        | 9.776         | 15.639      | 18.443       |
| 27            | 106.639            | 0.073         | 1.942      | 0.775        | 0.705         | 2.022       | 11.853         | 2.014        | 2.506        | 4.063         | 11.970      | 12.641       |
| 30            | 72.072             | 0.062         | 0.591      | 0.123        | 0.388         | 0.931       | 7.441          | 1.429        | 1.739        | 2.642         | 7.406       | 7.863        |
| 33            | 40.957             | 0.032         | 0.884      | 0.313        | 0.235         | 1.569       | 4.233          | 0.784        | 1.123        | 1.768         | 4.480       | 4.816        |
| 36            | 20.162             | 0.038         | 0.832      | 0.142        | 0.130         | 0.932       | 2.115          | 0.343        | 0.682        | 1.090         | 2.338       | 2.580        |
| 39            | 9.327              | 0.012         | 0.571      | 0.070        | 0.059         | 0.420       | 0.983          | 0.164        | 0.367        | 0.686         | 1.080       | 1.280        |
| 42            | 4.119              | 0.010         | 0.238      | 0.023        | 0.032         | 0.136       | 0.453          | 0.062        | 0.221        | 0.453         | 0.360       | 0.578        |
| 45            | 2.155              | 0.018         | 0.236      | 0.028        | 0.035         | 0.126       | 0.249          | 0.067        | 0.284        | 0.362         | 0.300       | 0.470        |
| 48            | 0.440              | 0.007         | 0.030      | 0.018        | 0.030         | 0.021       | 0.082          | 0.023        | 0.201        | 0.214         | 0.066       | 0.224        |
| 52            | 0.226              | 0.004         | 0.034      | 0.009        | 0.043         | 0.018       | 0.029          | 0.013        | 0.268        | 0.275         | 0.032       | 0.276        |
| 56            | 0.256              | 0.007         | 0.101      | 0.027        | 0.034         | 0.045       | 0.060          | 0.026        | 0.303        | 0.313         | 0.109       | 0.332        |
| 60            | 0.083              | 0.007         | 0.087      | 0.026        | 0.113         | 0.030       | 0.078          | 0.018        | 0.733        | 0.743         | 0.114       | 0.752        |
| 64            | -0.634             | 0.022         | 0.131      | 0.041        | 0.144         | 0.112       | 0.151          | 0.031        | 0.901        | 0.918         | 0.213       | 0.943        |
| 68            | -1.057             | 0.032         | 0.182      | 0.063        | 0.271         | 0.169       | 0.243          | 0.043        | 1.558        | 1.587         | 0.333       | 1.621        |

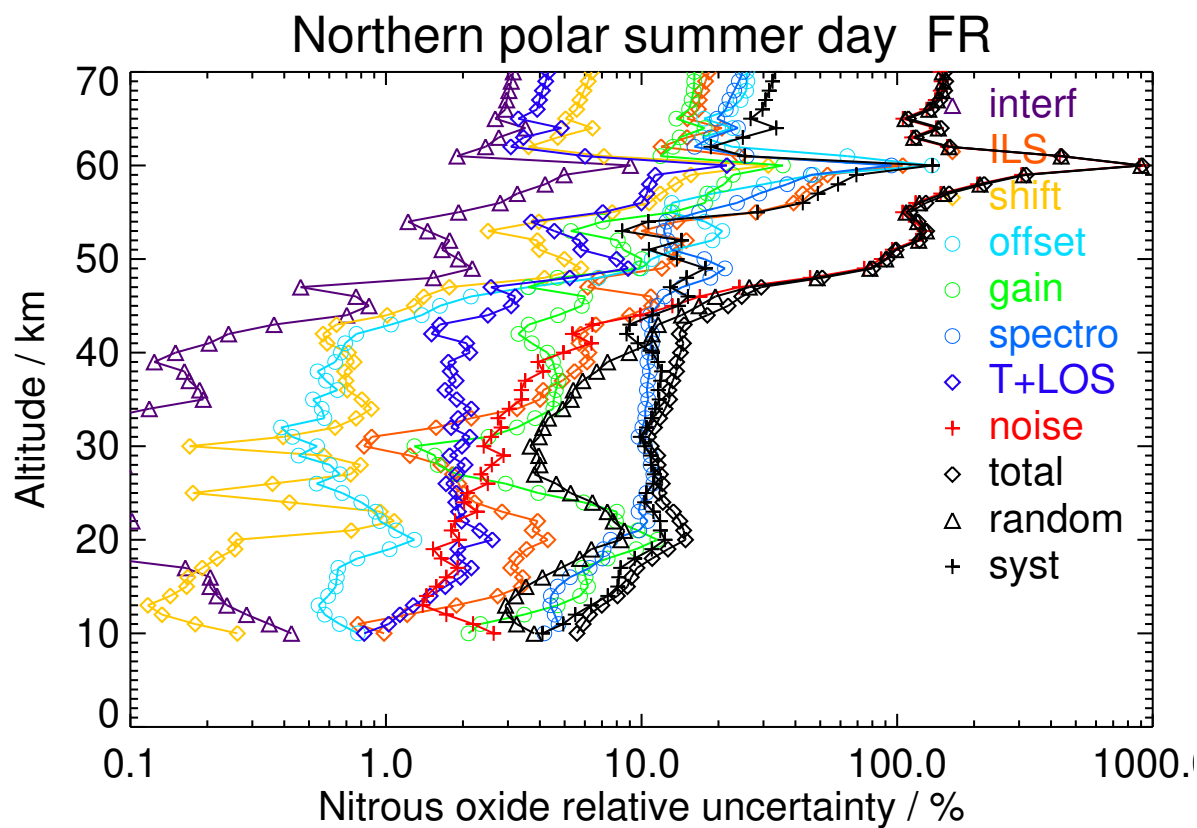

**Figure S141.** V8H\_N2O\_61 Northern polar summer day



**Table S142.** Nitrous oxide error budget for Northern polar summer night. All uncertainties are  $1\sigma$ .

| altitude (km) | mean target (ppbv) | interf (ppbv) | ILS (ppbv) | shift (ppbv) | offset (ppbv) | gain (ppbv) | spectro (ppbv) | T+LOS (ppbv) | noise (ppbv) | random (ppbv) | syst (ppbv) | total (ppbv) |
|---------------|--------------------|---------------|------------|--------------|---------------|-------------|----------------|--------------|--------------|---------------|-------------|--------------|
| 12            | 306.908            | 0.920         | 3.990      | 0.390        | 1.919         | 10.257      | 13.163         | 3.567        | 5.760        | 9.428         | 16.003      | 18.574       |
| 15            | 309.333            | 0.624         | 9.275      | 0.334        | 1.812         | 16.824      | 13.406         | 4.593        | 4.552        | 10.656        | 21.928      | 24.380       |
| 18            | 260.401            | 0.233         | 9.458      | 0.314        | 2.128         | 19.131      | 17.408         | 5.075        | 4.241        | 15.439        | 23.844      | 28.406       |
| 21            | 194.733            | 0.160         | 5.457      | 1.138        | 2.075         | 16.733      | 17.625         | 4.399        | 3.776        | 14.392        | 21.273      | 25.684       |
| 24            | 148.826            | 0.109         | 3.929      | 0.622        | 1.023         | 5.882       | 15.932         | 2.752        | 3.136        | 7.786         | 16.190      | 17.964       |
| 27            | 105.659            | 0.069         | 1.827      | 0.633        | 0.734         | 1.968       | 12.235         | 2.054        | 2.558        | 3.960         | 12.367      | 12.985       |
| 30            | 62.701             | 0.057         | 0.626      | 0.143        | 0.393         | 0.732       | 7.650          | 1.393        | 1.673        | 2.375         | 7.663       | 8.023        |
| 33            | 30.040             | 0.019         | 0.757      | 0.220        | 0.200         | 1.051       | 3.335          | 0.637        | 0.996        | 1.442         | 3.494       | 3.780        |
| 36            | 15.085             | 0.029         | 0.699      | 0.117        | 0.117         | 0.756       | 1.642          | 0.257        | 0.605        | 1.025         | 1.779       | 2.053        |
| 39            | 6.530              | 0.005         | 0.382      | 0.038        | 0.047         | 0.258       | 0.826          | 0.130        | 0.318        | 0.519         | 0.864       | 1.008        |
| 42            | 1.866              | 0.011         | 0.076      | 0.021        | 0.035         | 0.054       | 0.243          | 0.053        | 0.213        | 0.285         | 0.192       | 0.343        |
| 45            | 1.028              | 0.013         | 0.147      | 0.027        | 0.035         | 0.096       | 0.101          | 0.059        | 0.265        | 0.291         | 0.181       | 0.342        |
| 48            | 0.333              | 0.005         | 0.020      | 0.010        | 0.031         | 0.017       | 0.049          | 0.015        | 0.203        | 0.210         | 0.043       | 0.214        |
| 52            | 0.036              | 0.004         | 0.035      | 0.009        | 0.048         | 0.020       | 0.033          | 0.015        | 0.313        | 0.320         | 0.031       | 0.321        |
| 56            | 0.327              | 0.006         | 0.087      | 0.024        | 0.034         | 0.049       | 0.052          | 0.029        | 0.312        | 0.322         | 0.094       | 0.335        |
| 60            | 0.595              | 0.006         | 0.099      | 0.023        | 0.130         | 0.029       | 0.090          | 0.023        | 0.868        | 0.880         | 0.124       | 0.889        |
| 64            | -0.515             | 0.025         | 0.151      | 0.040        | 0.154         | 0.117       | 0.158          | 0.041        | 0.985        | 1.003         | 0.232       | 1.030        |
| 68            | -1.019             | 0.035         | 0.231      | 0.063        | 0.247         | 0.164       | 0.247          | 0.057        | 1.441        | 1.470         | 0.357       | 1.512        |

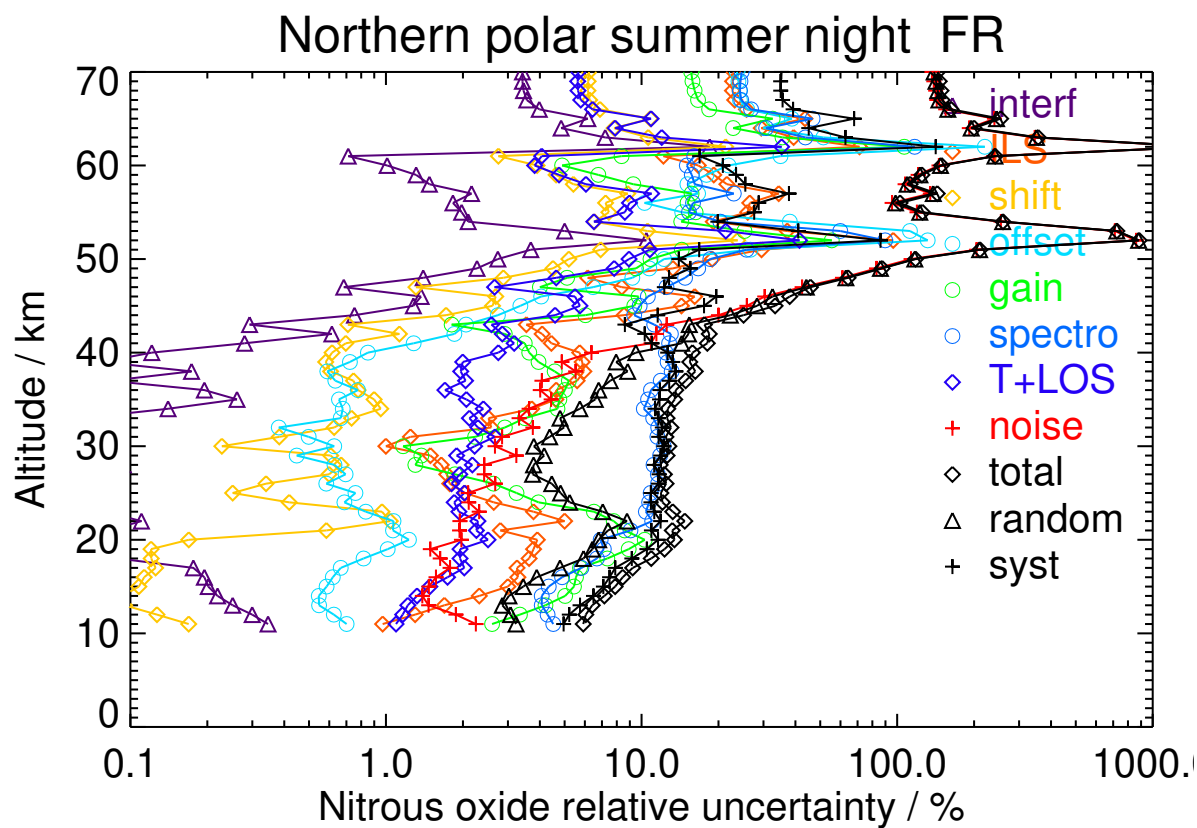

**Figure S142.** V8H\_N2O\_61 Northern polar summer night

**Table S143.** Nitrous oxide error budget for Northern polar autumn day. All uncertainties are  $1\sigma$ .

| altitude<br>(km) | mean target<br>(ppbv) | interf<br>(ppbv) | ILS<br>(ppbv) | shift<br>(ppbv) | offset<br>(ppbv) | gain<br>(ppbv) | spectro<br>(ppbv) | T+LOS<br>(ppbv) | noise<br>(ppbv) | random<br>(ppbv) | syst<br>(ppbv) | total<br>(ppbv) |
|------------------|-----------------------|------------------|---------------|-----------------|------------------|----------------|-------------------|-----------------|-----------------|------------------|----------------|-----------------|
| 9                | 300.482               | 2.869            | 1.439         | 0.494           | 2.630            | 6.276          | 12.545            | 2.998           | 8.062           | 11.203           | 12.756         | 16.977          |
| 12               | 309.265               | 1.630            | 4.195         | 0.455           | 1.883            | 11.677         | 13.736            | 3.532           | 5.258           | 9.664            | 17.198         | 19.727          |
| 15               | 297.051               | 1.496            | 7.062         | 0.641           | 1.842            | 15.543         | 14.996            | 5.551           | 5.339           | 10.877           | 21.527         | 24.119          |
| 18               | 264.148               | 0.637            | 17.617        | 1.330           | 1.942            | 21.809         | 13.718            | 8.527           | 5.232           | 16.660           | 28.331         | 32.866          |
| 21               | 201.011               | 0.484            | 8.048         | 0.738           | 2.236            | 17.709         | 13.394            | 5.682           | 4.570           | 11.242           | 22.144         | 24.834          |
| 24               | 143.144               | 0.189            | 2.606         | 1.285           | 1.406            | 10.039         | 14.997            | 2.918           | 3.809           | 6.998            | 17.613         | 18.952          |
| 27               | 89.306                | 0.114            | 1.443         | 0.780           | 0.732            | 5.231          | 11.155            | 1.823           | 3.127           | 5.242            | 11.860         | 12.967          |
| 30               | 42.632                | 0.034            | 1.510         | 0.214           | 0.317            | 1.868          | 7.426             | 1.220           | 2.080           | 3.832            | 7.224          | 8.178           |
| 33               | 12.590                | 0.036            | 0.693         | 0.113           | 0.177            | 0.732          | 2.674             | 0.554           | 1.177           | 2.177            | 2.272          | 3.147           |
| 36               | 3.092                 | 0.012            | 0.163         | 0.036           | 0.084            | 0.232          | 0.656             | 0.164           | 0.589           | 0.757            | 0.567          | 0.945           |
| 39               | 0.775                 | 0.004            | 0.055         | 0.017           | 0.041            | 0.103          | 0.186             | 0.056           | 0.359           | 0.401            | 0.145          | 0.427           |
| 42               | -0.023                | 0.003            | 0.027         | 0.013           | 0.031            | 0.096          | 0.083             | 0.037           | 0.313           | 0.333            | 0.082          | 0.343           |
| 45               | 0.315                 | 0.002            | 0.036         | 0.017           | 0.059            | 0.130          | 0.070             | 0.040           | 0.402           | 0.422            | 0.111          | 0.436           |
| 48               | 0.117                 | 0.002            | 0.018         | 0.009           | 0.069            | 0.057          | 0.038             | 0.015           | 0.510           | 0.519            | 0.023          | 0.520           |
| 52               | 0.424                 | 0.002            | 0.022         | 0.010           | 0.058            | 0.041          | 0.029             | 0.013           | 0.548           | 0.554            | 0.025          | 0.554           |
| 56               | 0.818                 | 0.002            | 0.037         | 0.016           | 0.088            | 0.098          | 0.044             | 0.029           | 0.660           | 0.670            | 0.093          | 0.676           |
| 60               | 0.886                 | 0.005            | 0.052         | 0.016           | 0.202            | 0.077          | 0.049             | 0.034           | 1.230           | 1.249            | 0.078          | 1.252           |
| 64               | 0.529                 | 0.009            | 0.048         | 0.011           | 0.247            | 0.088          | 0.068             | 0.031           | 1.467           | 1.490            | 0.092          | 1.493           |
| 68               | 0.447                 | 0.009            | 0.049         | 0.013           | 0.261            | 0.116          | 0.065             | 0.032           | 1.526           | 1.551            | 0.117          | 1.555           |

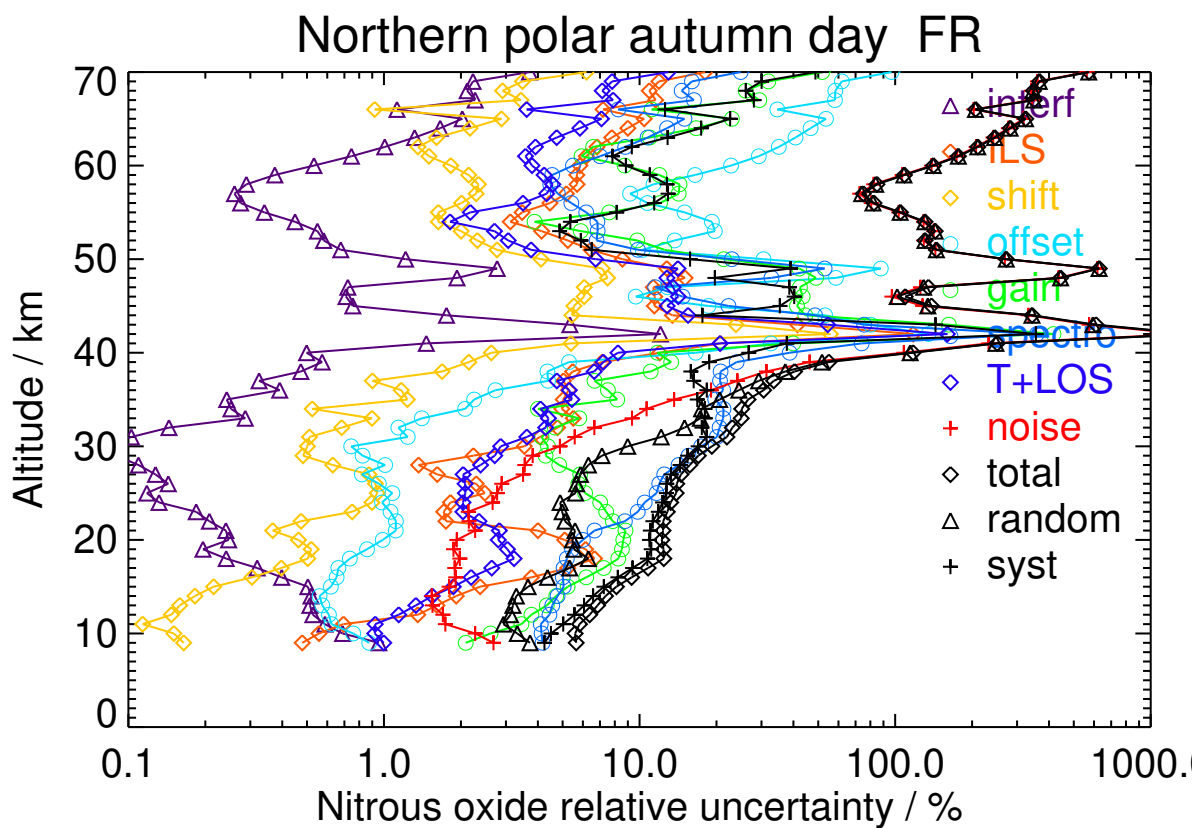

**Figure S143.** V8H\_N2O\_61 Northern polar autumn day

**Table S144.** Nitrous oxide error budget for Northern polar autumn night. All uncertainties are  $1\sigma$ .

| altitude<br>(km) | mean target<br>(ppbv) | interf<br>(ppbv) | ILS<br>(ppbv) | shift<br>(ppbv) | offset<br>(ppbv) | gain<br>(ppbv) | spectro<br>(ppbv) | T+LOS<br>(ppbv) | noise<br>(ppbv) | random<br>(ppbv) | syst<br>(ppbv) | total<br>(ppbv) |
|------------------|-----------------------|------------------|---------------|-----------------|------------------|----------------|-------------------|-----------------|-----------------|------------------|----------------|-----------------|
| 9                | 304.732               | 2.106            | 0.869         | 0.512           | 2.559            | 4.053          | 12.532            | 2.827           | 8.073           | 9.625            | 12.885         | 16.083          |
| 12               | 303.260               | 1.703            | 3.219         | 0.439           | 1.770            | 11.112         | 12.833            | 3.574           | 4.762           | 7.769            | 16.728         | 18.445          |
| 15               | 277.000               | 1.484            | 5.926         | 0.589           | 1.777            | 13.986         | 13.869            | 6.021           | 5.644           | 10.123           | 19.860         | 22.291          |
| 18               | 245.754               | 0.651            | 16.824        | 1.155           | 1.890            | 21.163         | 11.758            | 9.205           | 5.381           | 15.282           | 27.471         | 31.435          |
| 21               | 188.351               | 0.582            | 7.613         | 0.721           | 2.013            | 14.754         | 13.417            | 5.379           | 4.319           | 10.079           | 20.164         | 22.543          |
| 24               | 120.254               | 0.214            | 3.850         | 1.369           | 1.109            | 7.500          | 16.078            | 2.627           | 3.713           | 6.790            | 17.530         | 18.799          |
| 27               | 64.997                | 0.112            | 1.478         | 0.630           | 0.540            | 3.662          | 9.486             | 1.563           | 2.936           | 4.366            | 9.914          | 10.832          |
| 30               | 26.213                | 0.030            | 1.291         | 0.172           | 0.241            | 1.207          | 4.757             | 0.879           | 1.836           | 2.948            | 4.615          | 5.476           |
| 33               | 9.430                 | 0.036            | 0.433         | 0.117           | 0.169            | 0.773          | 1.786             | 0.430           | 1.073           | 1.627            | 1.645          | 2.314           |
| 36               | 2.255                 | 0.015            | 0.156         | 0.055           | 0.095            | 0.368          | 0.518             | 0.141           | 0.568           | 0.803            | 0.372          | 0.885           |
| 39               | 1.159                 | 0.006            | 0.071         | 0.022           | 0.043            | 0.148          | 0.208             | 0.050           | 0.343           | 0.419            | 0.133          | 0.439           |
| 42               | 0.512                 | 0.003            | 0.048         | 0.018           | 0.035            | 0.125          | 0.113             | 0.037           | 0.310           | 0.351            | 0.079          | 0.360           |
| 45               | 0.809                 | 0.003            | 0.037         | 0.020           | 0.059            | 0.130          | 0.101             | 0.036           | 0.392           | 0.418            | 0.109          | 0.432           |
| 48               | 0.902                 | 0.003            | 0.038         | 0.014           | 0.067            | 0.089          | 0.073             | 0.023           | 0.499           | 0.513            | 0.075          | 0.518           |
| 52               | 0.846                 | 0.004            | 0.030         | 0.015           | 0.056            | 0.084          | 0.056             | 0.024           | 0.528           | 0.541            | 0.041          | 0.542           |
| 56               | 1.117                 | 0.003            | 0.053         | 0.022           | 0.094            | 0.134          | 0.069             | 0.038           | 0.674           | 0.688            | 0.134          | 0.701           |
| 60               | 1.073                 | 0.007            | 0.082         | 0.028           | 0.202            | 0.146          | 0.089             | 0.051           | 1.196           | 1.220            | 0.143          | 1.229           |
| 64               | 0.854                 | 0.012            | 0.068         | 0.014           | 0.255            | 0.101          | 0.095             | 0.037           | 1.481           | 1.508            | 0.099          | 1.511           |
| 68               | 1.001                 | 0.009            | 0.066         | 0.013           | 0.257            | 0.109          | 0.091             | 0.036           | 1.486           | 1.513            | 0.109          | 1.517           |

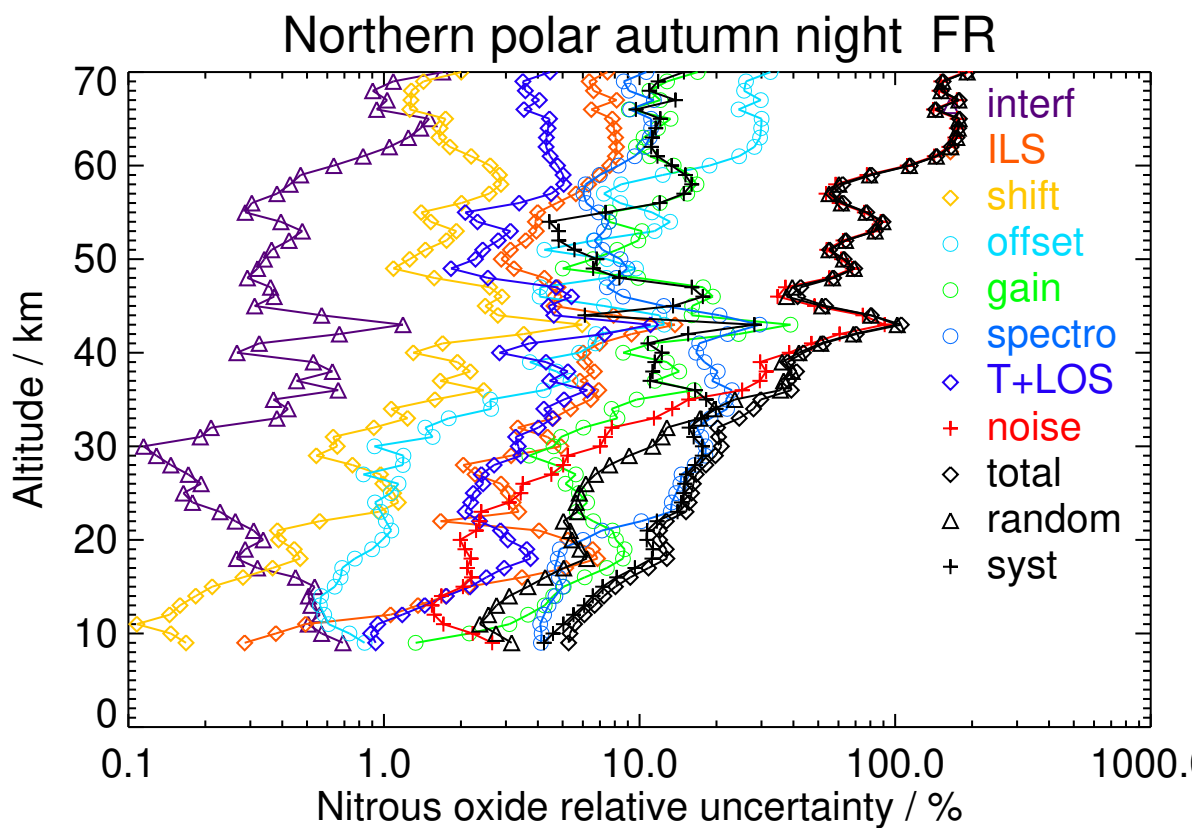

**Figure S144.** V8H\_N2O\_61 Northern polar autumn night

**Table S145.** Nitrous oxide error budget for Northern midlatitude winter day. All uncertainties are  $1\sigma$ .

| altitude<br>(km) | mean target<br>(ppbv) | interf<br>(ppbv) | ILS<br>(ppbv) | shift<br>(ppbv) | offset<br>(ppbv) | gain<br>(ppbv) | spectro<br>(ppbv) | T+LOS<br>(ppbv) | noise<br>(ppbv) | random<br>(ppbv) | syst<br>(ppbv) | total<br>(ppbv) |
|------------------|-----------------------|------------------|---------------|-----------------|------------------|----------------|-------------------|-----------------|-----------------|------------------|----------------|-----------------|
| 9                | 301.070               | 4.926            | 1.024         | 0.243           | 2.811            | 3.441          | 13.268            | 4.321           | 8.529           | 11.451           | 13.470         | 17.680          |
| 12               | 289.977               | 0.960            | 2.951         | 0.351           | 1.856            | 6.486          | 13.358            | 3.382           | 5.763           | 9.434            | 13.760         | 16.684          |
| 15               | 268.918               | 0.594            | 6.967         | 0.661           | 1.764            | 9.603          | 16.068            | 4.664           | 5.270           | 12.688           | 17.070         | 21.269          |
| 18               | 230.036               | 0.266            | 7.586         | 0.732           | 1.687            | 12.001         | 18.973            | 4.261           | 4.039           | 15.299           | 19.116         | 24.484          |
| 21               | 185.713               | 0.239            | 6.946         | 1.412           | 2.088            | 14.334         | 18.485            | 3.882           | 3.578           | 15.255           | 19.925         | 25.094          |
| 24               | 156.584               | 0.134            | 4.700         | 1.415           | 1.565            | 9.694          | 16.440            | 2.858           | 3.305           | 10.905           | 17.058         | 20.246          |
| 27               | 120.235               | 0.104            | 1.409         | 0.327           | 0.934            | 3.592          | 12.350            | 2.213           | 2.927           | 6.589            | 11.767         | 13.486          |
| 30               | 91.132                | 0.077            | 0.899         | 0.190           | 0.580            | 1.928          | 11.641            | 1.952           | 2.152           | 6.205            | 10.505         | 12.200          |
| 33               | 41.620                | 0.041            | 1.266         | 0.232           | 0.358            | 1.714          | 6.192             | 1.044           | 1.440           | 3.686            | 5.713          | 6.799           |
| 36               | 18.842                | 0.031            | 0.786         | 0.074           | 0.195            | 0.966          | 2.583             | 0.391           | 0.920           | 1.819            | 2.440          | 3.044           |
| 39               | 8.744                 | 0.015            | 0.397         | 0.047           | 0.121            | 0.531          | 0.880             | 0.160           | 0.647           | 1.022            | 0.794          | 1.294           |
| 42               | 9.910                 | 0.008            | 0.273         | 0.036           | 0.112            | 0.612          | 0.504             | 0.109           | 0.450           | 0.716            | 0.646          | 0.965           |
| 45               | 10.063                | 0.012            | 0.258         | 0.051           | 0.098            | 0.643          | 0.561             | 0.136           | 0.434           | 0.661            | 0.760          | 1.007           |
| 48               | 6.787                 | 0.007            | 0.155         | 0.034           | 0.075            | 0.301          | 0.646             | 0.081           | 0.485           | 0.655            | 0.593          | 0.884           |
| 52               | 2.288                 | 0.006            | 0.143         | 0.022           | 0.088            | 0.094          | 0.348             | 0.051           | 0.628           | 0.684            | 0.294          | 0.745           |
| 56               | 0.645                 | 0.018            | 0.082         | 0.032           | 0.083            | 0.101          | 0.158             | 0.050           | 0.693           | 0.724            | 0.092          | 0.730           |
| 60               | 0.470                 | 0.020            | 0.132         | 0.023           | 0.216            | 0.115          | 0.137             | 0.037           | 1.527           | 1.554            | 0.119          | 1.559           |
| 64               | -0.177                | 0.024            | 0.113         | 0.031           | 0.229            | 0.205          | 0.156             | 0.038           | 1.500           | 1.531            | 0.199          | 1.544           |
| 68               | -0.646                | 0.018            | 0.061         | 0.025           | 0.275            | 0.208          | 0.115             | 0.035           | 1.659           | 1.689            | 0.194          | 1.700           |

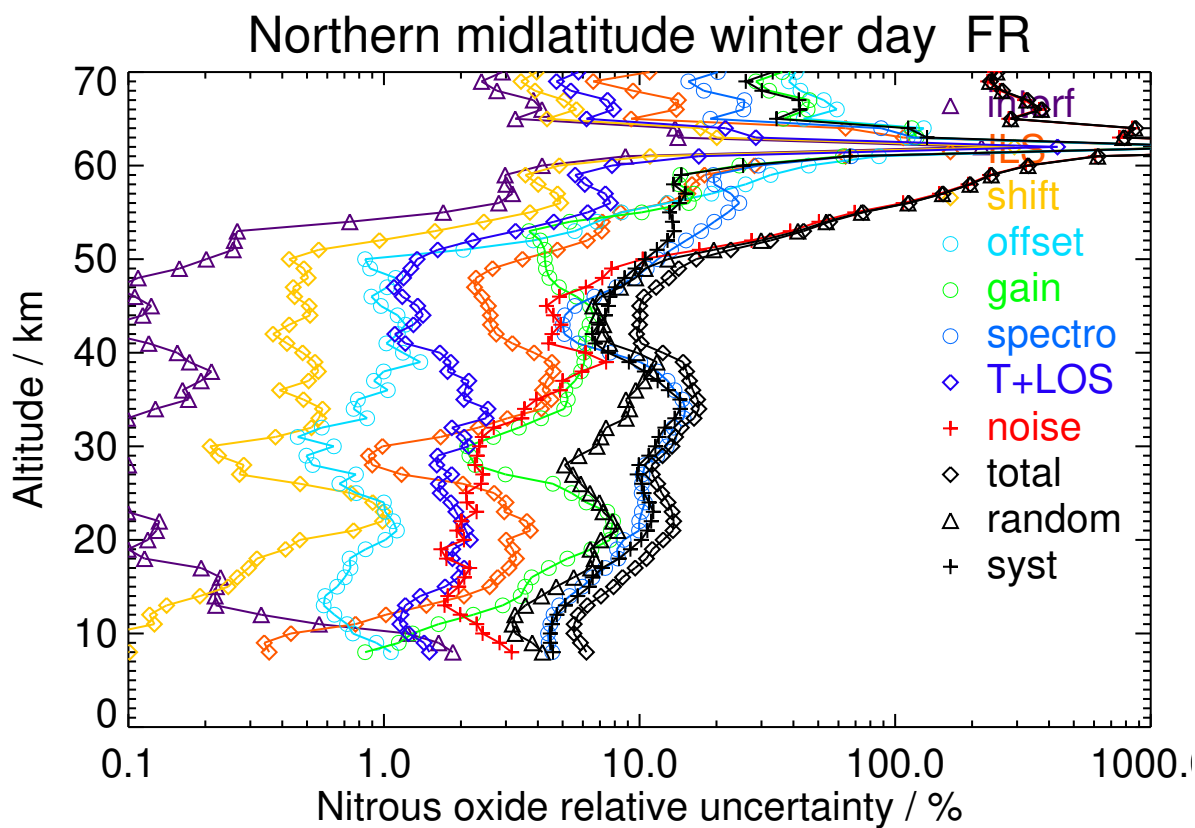

**Figure S145.** V8H\_N2O\_61 Northern midlatitude winter day

**Table S146.** Nitrous oxide error budget for Northern midlatitude winter night. All uncertainties are  $1\sigma$ .

| altitude<br>(km) | mean target<br>(ppbv) | interf<br>(ppbv) | ILS<br>(ppbv) | shift<br>(ppbv) | offset<br>(ppbv) | gain<br>(ppbv) | spectro<br>(ppbv) | T+LOS<br>(ppbv) | noise<br>(ppbv) | random<br>(ppbv) | syst<br>(ppbv) | total<br>(ppbv) |
|------------------|-----------------------|------------------|---------------|-----------------|------------------|----------------|-------------------|-----------------|-----------------|------------------|----------------|-----------------|
| 9                | 296.306               | 4.032            | 0.936         | 0.349           | 2.691            | 3.095          | 13.809            | 3.899           | 8.469           | 11.200           | 13.648         | 17.655          |
| 12               | 286.744               | 1.300            | 2.593         | 0.327           | 1.578            | 6.271          | 15.343            | 3.100           | 5.225           | 9.391            | 15.312         | 17.963          |
| 15               | 261.305               | 0.518            | 5.995         | 0.628           | 1.763            | 8.650          | 17.098            | 4.459           | 5.164           | 13.017           | 16.852         | 21.294          |
| 18               | 221.707               | 0.252            | 5.620         | 0.548           | 1.435            | 8.226          | 18.785            | 4.388           | 4.103           | 12.711           | 18.141         | 22.151          |
| 21               | 186.799               | 0.174            | 7.072         | 0.997           | 1.483            | 10.244         | 17.960            | 3.874           | 3.554           | 12.913           | 18.484         | 22.547          |
| 24               | 162.989               | 0.118            | 4.744         | 1.198           | 1.491            | 10.722         | 15.255            | 2.972           | 3.274           | 10.559           | 16.790         | 19.834          |
| 27               | 138.106               | 0.104            | 2.102         | 0.278           | 0.954            | 6.014          | 13.087            | 2.171           | 2.838           | 6.569            | 13.508         | 15.020          |
| 30               | 102.038               | 0.083            | 0.842         | 0.207           | 0.535            | 2.255          | 11.269            | 1.830           | 2.163           | 4.057            | 11.167         | 11.881          |
| 33               | 55.751                | 0.037            | 1.549         | 0.283           | 0.344            | 2.149          | 7.438             | 1.068           | 1.425           | 3.549            | 7.288          | 8.107           |
| 36               | 17.934                | 0.031            | 0.957         | 0.090           | 0.150            | 0.900          | 3.299             | 0.426           | 0.856           | 1.859            | 3.177          | 3.682           |
| 39               | 6.994                 | 0.009            | 0.268         | 0.033           | 0.091            | 0.315          | 0.706             | 0.120           | 0.546           | 0.813            | 0.575          | 0.996           |
| 42               | 7.593                 | 0.008            | 0.174         | 0.030           | 0.069            | 0.369          | 0.416             | 0.078           | 0.351           | 0.529            | 0.442          | 0.689           |
| 45               | 7.316                 | 0.012            | 0.225         | 0.058           | 0.095            | 0.579          | 0.473             | 0.120           | 0.407           | 0.631            | 0.635          | 0.895           |
| 48               | 4.611                 | 0.006            | 0.125         | 0.017           | 0.071            | 0.203          | 0.420             | 0.059           | 0.429           | 0.521            | 0.393          | 0.653           |
| 52               | 1.933                 | 0.008            | 0.125         | 0.019           | 0.080            | 0.119          | 0.251             | 0.040           | 0.582           | 0.621            | 0.234          | 0.663           |
| 56               | 0.521                 | 0.017            | 0.091         | 0.025           | 0.081            | 0.142          | 0.154             | 0.047           | 0.617           | 0.662            | 0.071          | 0.666           |
| 60               | 0.369                 | 0.021            | 0.135         | 0.024           | 0.226            | 0.099          | 0.147             | 0.041           | 1.561           | 1.589            | 0.112          | 1.593           |
| 64               | -0.461                | 0.029            | 0.189         | 0.046           | 0.240            | 0.280          | 0.236             | 0.078           | 1.589           | 1.632            | 0.310          | 1.661           |
| 68               | -0.875                | 0.023            | 0.088         | 0.039           | 0.261            | 0.326          | 0.148             | 0.065           | 1.612           | 1.649            | 0.299          | 1.676           |

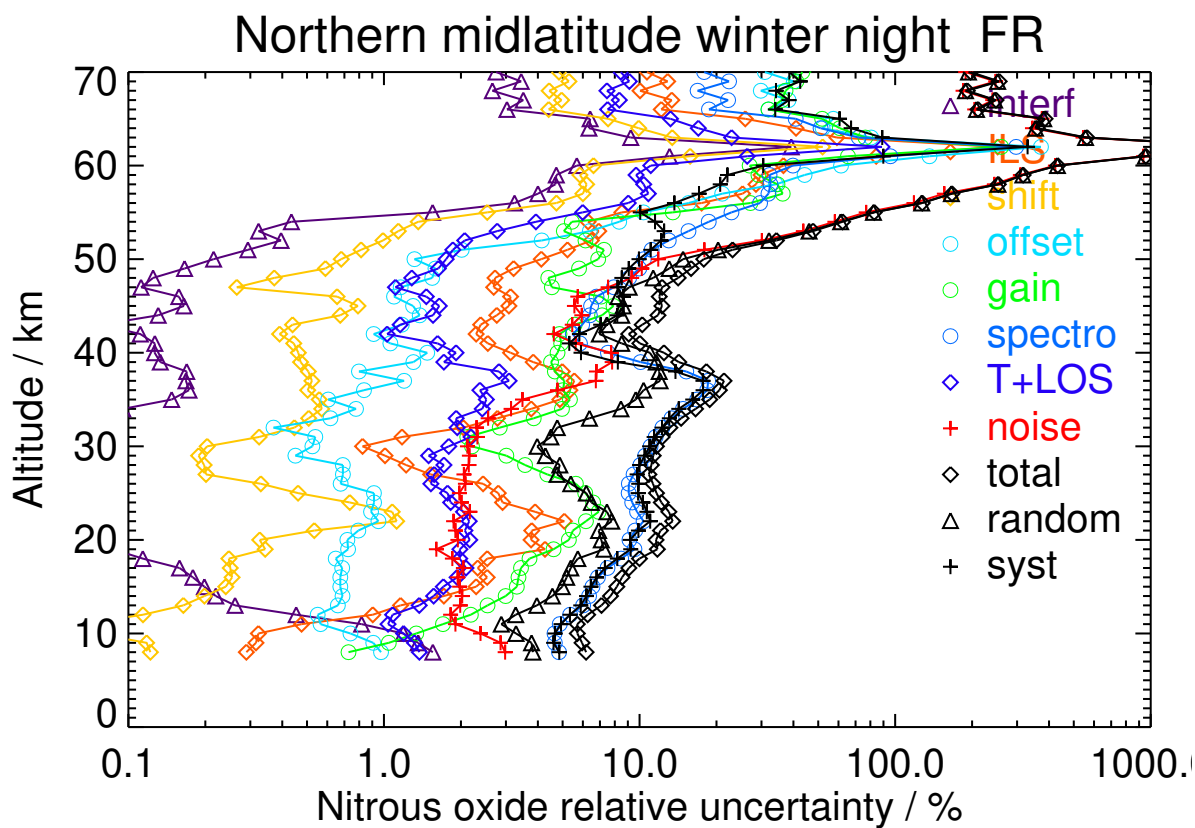

**Figure S146.** V8H\_N2O\_61 Northern midlatitude winter night

**Table S147.** Nitrous oxide error budget for Northern midlatitude spring day. All uncertainties are  $1\sigma$ .

| altitude<br>(km) | mean target<br>(ppbv) | interf<br>(ppbv) | ILS<br>(ppbv) | shift<br>(ppbv) | offset<br>(ppbv) | gain<br>(ppbv) | spectro<br>(ppbv) | T+LOS<br>(ppbv) | noise<br>(ppbv) | random<br>(ppbv) | syst<br>(ppbv) | total<br>(ppbv) |
|------------------|-----------------------|------------------|---------------|-----------------|------------------|----------------|-------------------|-----------------|-----------------|------------------|----------------|-----------------|
| 9                | 273.252               | 2.206            | 1.303         | 0.527           | 2.527            | 4.242          | 10.211            | 3.088           | 8.052           | 10.106           | 10.379         | 14.487          |
| 12               | 296.180               | 0.829            | 4.053         | 0.248           | 1.943            | 12.134         | 12.107            | 3.930           | 5.174           | 9.289            | 16.453         | 18.894          |
| 15               | 279.127               | 0.803            | 6.934         | 0.447           | 1.895            | 12.480         | 14.179            | 5.555           | 5.548           | 12.186           | 17.957         | 21.701          |
| 18               | 250.142               | 0.399            | 13.719        | 0.773           | 2.721            | 22.039         | 17.392            | 6.852           | 4.318           | 18.223           | 26.797         | 32.406          |
| 21               | 179.690               | 0.332            | 6.237         | 1.651           | 2.435            | 16.730         | 17.409            | 4.158           | 3.706           | 15.943           | 20.186         | 25.723          |
| 24               | 148.184               | 0.154            | 4.172         | 0.876           | 1.130            | 6.830          | 15.289            | 2.636           | 3.308           | 9.827            | 14.872         | 17.826          |
| 27               | 114.183               | 0.115            | 1.492         | 0.508           | 0.683            | 2.470          | 13.282            | 2.013           | 2.868           | 6.307            | 12.569         | 14.062          |
| 30               | 74.906                | 0.076            | 0.911         | 0.246           | 0.362            | 1.218          | 8.251             | 1.544           | 2.110           | 4.074            | 7.799          | 8.799           |
| 33               | 51.546                | 0.068            | 0.657         | 0.325           | 0.297            | 1.631          | 4.702             | 0.958           | 1.486           | 2.647            | 4.639          | 5.341           |
| 36               | 32.240                | 0.055            | 1.143         | 0.214           | 0.233            | 1.576          | 2.820             | 0.466           | 0.955           | 1.757            | 3.145          | 3.602           |
| 39               | 19.033                | 0.025            | 1.086         | 0.143           | 0.138            | 1.069          | 1.826             | 0.264           | 0.633           | 1.280            | 2.128          | 2.483           |
| 42               | 9.235                 | 0.016            | 0.544         | 0.040           | 0.071            | 0.452          | 0.914             | 0.133           | 0.385           | 0.727            | 0.989          | 1.228           |
| 45               | 5.698                 | 0.013            | 0.265         | 0.021           | 0.034            | 0.211          | 0.507             | 0.057           | 0.276           | 0.409            | 0.535          | 0.673           |
| 48               | 3.398                 | 0.008            | 0.090         | 0.018           | 0.029            | 0.090          | 0.257             | 0.043           | 0.263           | 0.318            | 0.231          | 0.393           |
| 52               | 1.539                 | 0.003            | 0.063         | 0.010           | 0.052            | 0.039          | 0.120             | 0.024           | 0.330           | 0.345            | 0.114          | 0.363           |
| 56               | 1.033                 | 0.009            | 0.115         | 0.030           | 0.075            | 0.078          | 0.123             | 0.025           | 0.565           | 0.580            | 0.156          | 0.601           |
| 60               | 0.251                 | 0.006            | 0.036         | 0.007           | 0.111            | 0.042          | 0.071             | 0.016           | 0.770           | 0.782            | 0.044          | 0.783           |
| 64               | -0.641                | 0.034            | 0.321         | 0.060           | 0.232            | 0.308          | 0.423             | 0.044           | 1.363           | 1.464            | 0.388          | 1.515           |
| 68               | -0.987                | 0.038            | 0.369         | 0.072           | 0.308            | 0.349          | 0.487             | 0.049           | 1.757           | 1.866            | 0.452          | 1.920           |

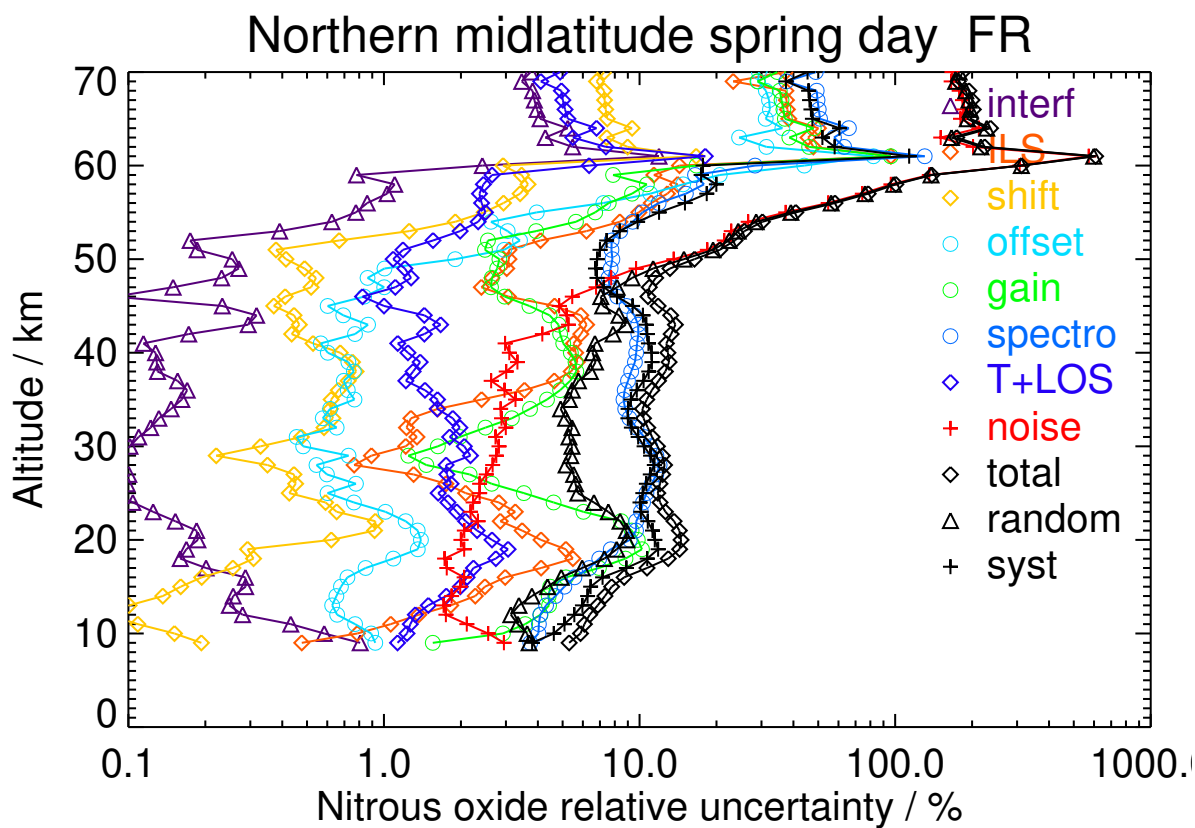

**Figure S147.** V8H\_N2O\_61 Northern midlatitude spring day

**Table S148.** Nitrous oxide error budget for Northern midlatitude spring night. All uncertainties are  $1\sigma$ .

| altitude<br>(km) | mean target<br>(ppbv) | interf<br>(ppbv) | ILS<br>(ppbv) | shift<br>(ppbv) | offset<br>(ppbv) | gain<br>(ppbv) | spectro<br>(ppbv) | T+LOS<br>(ppbv) | noise<br>(ppbv) | random<br>(ppbv) | syst<br>(ppbv) | total<br>(ppbv) |
|------------------|-----------------------|------------------|---------------|-----------------|------------------|----------------|-------------------|-----------------|-----------------|------------------|----------------|-----------------|
| 9                | 287.091               | 1.978            | 0.180         | 0.445           | 2.370            | 6.426          | 11.659            | 3.063           | 7.045           | 8.389            | 13.252         | 15.685          |
| 12               | 293.629               | 0.789            | 4.111         | 0.262           | 1.837            | 12.948         | 11.683            | 3.777           | 4.874           | 8.798            | 16.903         | 19.055          |
| 15               | 270.668               | 0.796            | 6.835         | 0.363           | 1.858            | 13.129         | 13.948            | 5.310           | 5.366           | 11.850           | 18.287         | 21.790          |
| 18               | 216.620               | 0.271            | 8.126         | 0.594           | 1.811            | 14.875         | 16.635            | 4.451           | 3.518           | 15.271           | 19.149         | 24.493          |
| 21               | 164.124               | 0.297            | 7.853         | 1.718           | 2.044            | 13.704         | 17.349            | 3.646           | 3.492           | 17.162           | 16.989         | 24.149          |
| 24               | 147.846               | 0.155            | 3.915         | 0.473           | 0.999            | 5.088          | 13.808            | 2.433           | 3.090           | 8.991            | 12.951         | 15.767          |
| 27               | 126.428               | 0.128            | 1.302         | 0.705           | 0.701            | 2.028          | 13.413            | 2.079           | 2.727           | 4.686            | 13.286         | 14.088          |
| 30               | 87.384                | 0.083            | 0.659         | 0.309           | 0.386            | 1.563          | 8.914             | 1.611           | 2.048           | 3.857            | 8.632          | 9.454           |
| 33               | 63.108                | 0.077            | 1.099         | 0.361           | 0.331            | 1.741          | 6.308             | 1.085           | 1.571           | 3.606            | 5.909          | 6.923           |
| 36               | 35.218                | 0.059            | 1.149         | 0.226           | 0.263            | 1.806          | 3.454             | 0.534           | 1.004           | 2.008            | 3.728          | 4.234           |
| 39               | 19.953                | 0.031            | 0.932         | 0.169           | 0.160            | 1.152          | 1.907             | 0.289           | 0.647           | 1.303            | 2.166          | 2.527           |
| 42               | 9.336                 | 0.015            | 0.538         | 0.064           | 0.075            | 0.516          | 0.966             | 0.126           | 0.353           | 0.766            | 1.026          | 1.280           |
| 45               | 5.565                 | 0.017            | 0.307         | 0.027           | 0.041            | 0.282          | 0.516             | 0.068           | 0.286           | 0.460            | 0.563          | 0.727           |
| 48               | 3.324                 | 0.006            | 0.050         | 0.028           | 0.031            | 0.071          | 0.217             | 0.043           | 0.257           | 0.289            | 0.202          | 0.353           |
| 52               | 1.718                 | 0.003            | 0.065         | 0.010           | 0.055            | 0.044          | 0.125             | 0.021           | 0.344           | 0.358            | 0.125          | 0.379           |
| 56               | 1.113                 | 0.009            | 0.099         | 0.028           | 0.065            | 0.076          | 0.108             | 0.025           | 0.524           | 0.537            | 0.135          | 0.554           |
| 60               | 0.471                 | 0.005            | 0.024         | 0.009           | 0.122            | 0.023          | 0.065             | 0.016           | 0.852           | 0.862            | 0.049          | 0.864           |
| 64               | -0.375                | 0.031            | 0.163         | 0.054           | 0.221            | 0.217          | 0.282             | 0.039           | 1.322           | 1.362            | 0.319          | 1.398           |
| 68               | -0.802                | 0.034            | 0.181         | 0.064           | 0.298            | 0.248          | 0.313             | 0.043           | 1.714           | 1.758            | 0.366          | 1.796           |

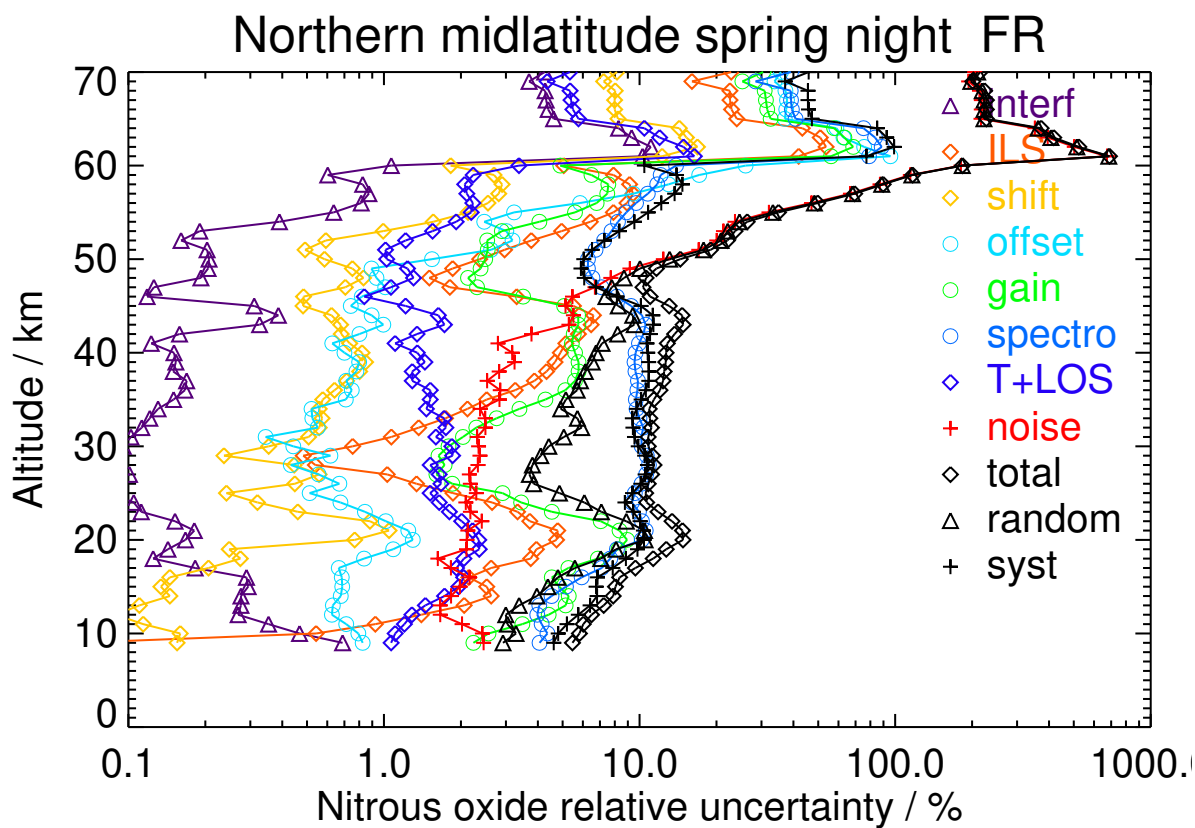

**Figure S148.** V8H\_N2O\_61 Northern midlatitude spring night



**Table S149.** Nitrous oxide error budget for Northern midlatitude summer day. All uncertainties are  $1\sigma$ .

| altitude<br>(km) | mean target<br>(ppbv) | interf<br>(ppbv) | ILS<br>(ppbv) | shift<br>(ppbv) | offset<br>(ppbv) | gain<br>(ppbv) | spectro<br>(ppbv) | T+LOS<br>(ppbv) | noise<br>(ppbv) | random<br>(ppbv) | syst<br>(ppbv) | total<br>(ppbv) |
|------------------|-----------------------|------------------|---------------|-----------------|------------------|----------------|-------------------|-----------------|-----------------|------------------|----------------|-----------------|
| 12               | 325.507               | 1.162            | 8.928         | 0.301           | 2.436            | 14.775         | 13.937            | 4.643           | 6.539           | 12.124           | 20.419         | 23.748          |
| 15               | 328.325               | 1.033            | 14.610        | 0.457           | 2.711            | 16.347         | 15.467            | 6.831           | 7.357           | 15.298           | 24.399         | 28.798          |
| 18               | 289.498               | 0.716            | 6.337         | 0.557           | 1.917            | 13.121         | 19.540            | 5.003           | 5.097           | 13.488           | 21.627         | 25.488          |
| 21               | 200.527               | 0.320            | 11.230        | 1.106           | 1.662            | 5.513          | 25.003            | 4.334           | 4.127           | 9.788            | 26.940         | 28.663          |
| 24               | 159.233               | 0.169            | 6.388         | 0.640           | 1.248            | 3.216          | 17.312            | 3.268           | 3.403           | 6.410            | 18.276         | 19.367          |
| 27               | 127.974               | 0.124            | 1.890         | 0.840           | 0.857            | 1.720          | 12.744            | 2.447           | 2.856           | 4.570            | 12.793         | 13.585          |
| 30               | 92.066                | 0.087            | 0.412         | 0.281           | 0.492            | 1.615          | 10.289            | 1.937           | 2.030           | 3.393            | 10.263         | 10.810          |
| 33               | 49.380                | 0.055            | 1.001         | 0.339           | 0.290            | 1.284          | 4.898             | 1.054           | 1.379           | 2.118            | 5.037          | 5.464           |
| 36               | 30.614                | 0.039            | 1.234         | 0.205           | 0.217            | 1.427          | 2.873             | 0.471           | 0.870           | 1.372            | 3.316          | 3.589           |
| 39               | 15.299                | 0.019            | 0.886         | 0.104           | 0.117            | 0.933          | 1.641             | 0.251           | 0.509           | 0.956            | 1.944          | 2.167           |
| 42               | 6.556                 | 0.009            | 0.321         | 0.037           | 0.052            | 0.379          | 0.696             | 0.085           | 0.247           | 0.528            | 0.724          | 0.896           |
| 45               | 3.317                 | 0.012            | 0.197         | 0.014           | 0.037            | 0.234          | 0.361             | 0.070           | 0.274           | 0.441            | 0.334          | 0.553           |
| 48               | 1.707                 | 0.006            | 0.061         | 0.023           | 0.034            | 0.086          | 0.186             | 0.035           | 0.235           | 0.299            | 0.119          | 0.322           |
| 52               | 1.370                 | 0.004            | 0.052         | 0.009           | 0.052            | 0.056          | 0.116             | 0.014           | 0.327           | 0.351            | 0.076          | 0.359           |
| 56               | 1.000                 | 0.009            | 0.067         | 0.020           | 0.050            | 0.067          | 0.109             | 0.022           | 0.424           | 0.443            | 0.087          | 0.451           |
| 60               | 0.699                 | 0.005            | 0.049         | 0.015           | 0.127            | 0.037          | 0.094             | 0.021           | 0.885           | 0.898            | 0.081          | 0.901           |
| 64               | -1.529                | 0.045            | 0.246         | 0.075           | 0.195            | 0.361          | 0.450             | 0.063           | 1.180           | 1.223            | 0.584          | 1.355           |
| 68               | -2.459                | 0.054            | 0.296         | 0.097           | 0.277            | 0.446          | 0.569             | 0.074           | 1.594           | 1.641            | 0.744          | 1.802           |

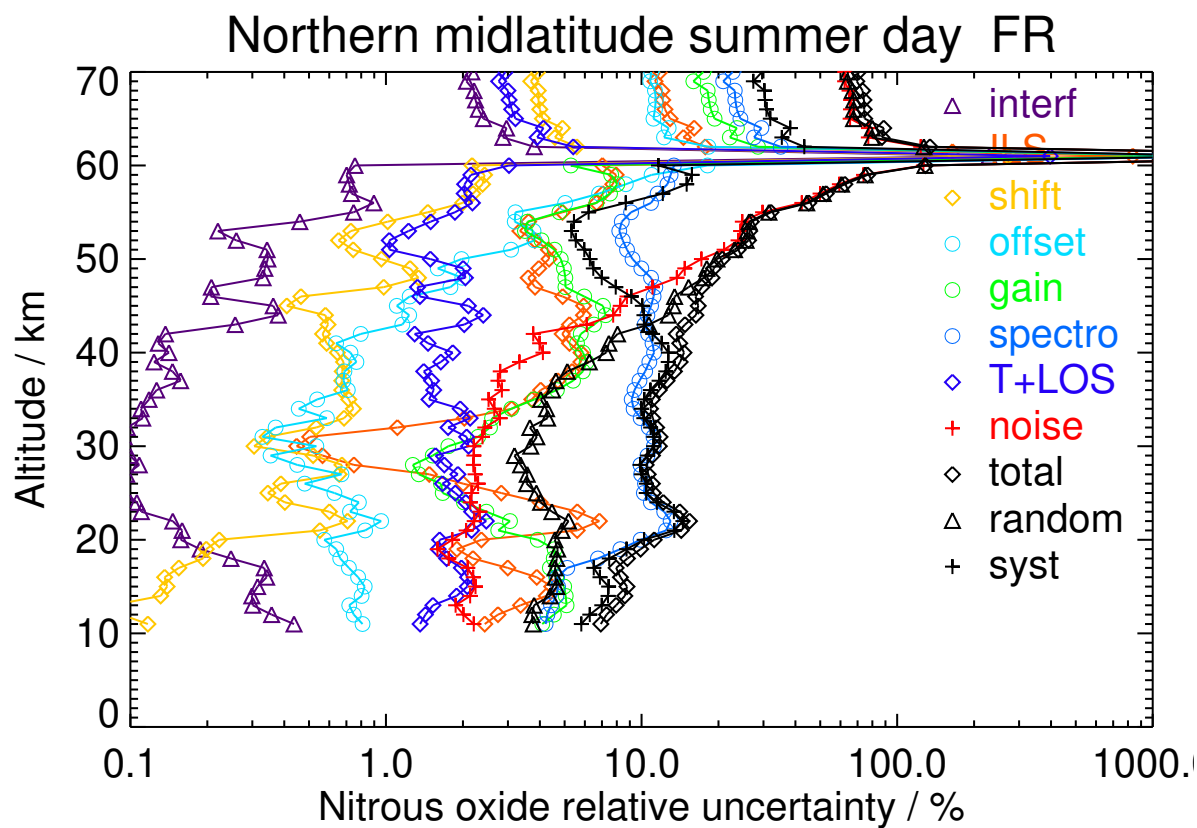

**Figure S149.** V8H\_N2O\_61 Northern midlatitude summer day



**Table S150.** Nitrous oxide error budget for Northern midlatitude summer night. All uncertainties are  $1\sigma$ .

| altitude<br>(km) | mean target<br>(ppbv) | interf<br>(ppbv) | ILS<br>(ppbv) | shift<br>(ppbv) | offset<br>(ppbv) | gain<br>(ppbv) | spectro<br>(ppbv) | T+LOS<br>(ppbv) | noise<br>(ppbv) | random<br>(ppbv) | syst<br>(ppbv) | total<br>(ppbv) |
|------------------|-----------------------|------------------|---------------|-----------------|------------------|----------------|-------------------|-----------------|-----------------|------------------|----------------|-----------------|
| 12               | 321.032               | 1.237            | 6.139         | 0.303           | 2.472            | 12.113         | 12.284            | 4.666           | 6.900           | 11.432           | 16.784         | 20.308          |
| 15               | 321.694               | 0.978            | 9.842         | 0.155           | 2.101            | 14.145         | 13.423            | 5.640           | 6.107           | 13.198           | 19.427         | 23.487          |
| 18               | 273.812               | 0.628            | 5.145         | 0.330           | 1.472            | 8.748          | 19.129            | 4.966           | 5.004           | 12.354           | 19.200         | 22.832          |
| 21               | 194.118               | 0.286            | 9.944         | 0.625           | 1.296            | 2.834          | 24.039            | 4.036           | 3.906           | 7.290            | 25.794         | 26.804          |
| 24               | 151.936               | 0.163            | 6.211         | 0.329           | 1.094            | 2.751          | 16.942            | 3.195           | 3.312           | 5.631            | 17.999         | 18.859          |
| 27               | 126.456               | 0.117            | 1.769         | 0.668           | 0.744            | 1.437          | 13.436            | 2.300           | 2.745           | 4.206            | 13.486         | 14.127          |
| 30               | 83.408                | 0.083            | 0.308         | 0.127           | 0.440            | 1.538          | 9.226             | 1.694           | 1.915           | 3.179            | 9.178          | 9.713           |
| 33               | 49.115                | 0.055            | 0.924         | 0.340           | 0.268            | 1.152          | 4.843             | 0.902           | 1.328           | 2.002            | 4.939          | 5.329           |
| 36               | 26.689                | 0.043            | 0.959         | 0.129           | 0.159            | 0.989          | 2.704             | 0.409           | 0.845           | 1.213            | 2.943          | 3.183           |
| 39               | 13.688                | 0.024            | 0.591         | 0.087           | 0.088            | 0.649          | 1.276             | 0.194           | 0.489           | 0.769            | 1.449          | 1.640           |
| 42               | 7.167                 | 0.011            | 0.251         | 0.040           | 0.046            | 0.332          | 0.566             | 0.070           | 0.252           | 0.465            | 0.592          | 0.752           |
| 45               | 5.022                 | 0.017            | 0.249         | 0.020           | 0.047            | 0.316          | 0.386             | 0.075           | 0.304           | 0.453            | 0.455          | 0.642           |
| 48               | 3.774                 | 0.008            | 0.145         | 0.039           | 0.045            | 0.231          | 0.372             | 0.038           | 0.263           | 0.467            | 0.261          | 0.536           |
| 52               | 1.885                 | 0.005            | 0.093         | 0.014           | 0.056            | 0.077          | 0.210             | 0.025           | 0.378           | 0.428            | 0.150          | 0.454           |
| 56               | 1.048                 | 0.011            | 0.062         | 0.024           | 0.045            | 0.055          | 0.119             | 0.028           | 0.399           | 0.419            | 0.090          | 0.429           |
| 60               | 1.257                 | 0.005            | 0.049         | 0.015           | 0.156            | 0.030          | 0.088             | 0.019           | 1.081           | 1.094            | 0.082          | 1.097           |
| 64               | 0.072                 | 0.038            | 0.171         | 0.061           | 0.180            | 0.219          | 0.280             | 0.043           | 1.169           | 1.193            | 0.372          | 1.250           |
| 68               | -0.434                | 0.048            | 0.228         | 0.084           | 0.240            | 0.290          | 0.374             | 0.053           | 1.428           | 1.460            | 0.504          | 1.544           |

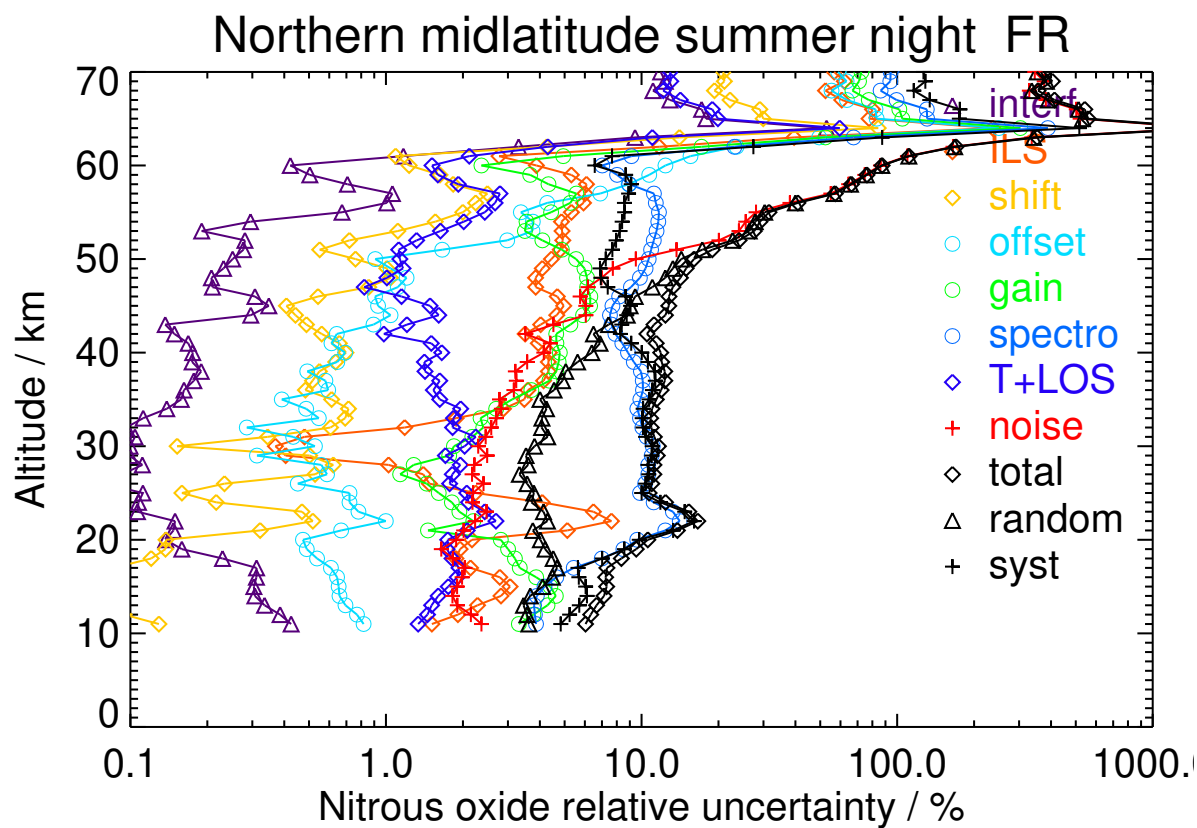

**Figure S150.** V8H\_N2O\_61 Northern midlatitude summer night

**Table S151.** Nitrous oxide error budget for Northern midlatitude autumn day. All uncertainties are  $1\sigma$ .

| altitude (km) | mean target (ppbv) | interf (ppbv) | ILS (ppbv) | shift (ppbv) | offset (ppbv) | gain (ppbv) | spectro (ppbv) | T+LOS (ppbv) | noise (ppbv) | random (ppbv) | syst (ppbv) | total (ppbv) |
|---------------|--------------------|---------------|------------|--------------|---------------|-------------|----------------|--------------|--------------|---------------|-------------|--------------|
| 12            | 329.761            | 1.181         | 9.979      | 0.245        | 2.901         | 13.423      | 14.562         | 5.434        | 7.468        | 14.832        | 19.157      | 24.227       |
| 15            | 327.229            | 1.062         | 13.716     | 0.303        | 2.595         | 15.984      | 16.023         | 6.652        | 6.572        | 16.997        | 22.514      | 28.209       |
| 18            | 271.923            | 0.652         | 15.359     | 0.492        | 2.262         | 16.042      | 17.839         | 7.184        | 5.092        | 22.878        | 19.272      | 29.914       |
| 21            | 191.734            | 0.301         | 11.240     | 0.776        | 1.809         | 10.117      | 27.204         | 5.024        | 4.293        | 17.826        | 26.431      | 31.881       |
| 24            | 138.949            | 0.118         | 8.068      | 0.562        | 1.139         | 4.011       | 18.018         | 3.025        | 3.551        | 8.044         | 19.092      | 20.718       |
| 27            | 112.199            | 0.094         | 2.031      | 0.304        | 0.740         | 1.505       | 12.399         | 1.965        | 2.829        | 5.003         | 12.150      | 13.140       |
| 30            | 83.644             | 0.077         | 0.723      | 0.133        | 0.453         | 1.306       | 9.454          | 1.527        | 2.090        | 4.324         | 8.935       | 9.926        |
| 33            | 51.952             | 0.055         | 0.868      | 0.241        | 0.287         | 1.372       | 5.677          | 0.904        | 1.505        | 3.306         | 5.212       | 6.172        |
| 36            | 33.025             | 0.047         | 0.933      | 0.150        | 0.241         | 1.430       | 3.095          | 0.444        | 1.088        | 2.047         | 3.125       | 3.736        |
| 39            | 23.614             | 0.034         | 0.965      | 0.192        | 0.212         | 1.418       | 1.855          | 0.279        | 0.710        | 1.394         | 2.259       | 2.654        |
| 42            | 15.459             | 0.014         | 0.735      | 0.122        | 0.126         | 0.974       | 1.294          | 0.169        | 0.428        | 0.980         | 1.564       | 1.845        |
| 45            | 9.040              | 0.020         | 0.474      | 0.041        | 0.092         | 0.625       | 0.895          | 0.135        | 0.462        | 0.837         | 0.979       | 1.288        |
| 48            | 4.833              | 0.005         | 0.138      | 0.037        | 0.062         | 0.168       | 0.469          | 0.055        | 0.377        | 0.513         | 0.394       | 0.646        |
| 52            | 3.477              | 0.008         | 0.126      | 0.019        | 0.066         | 0.109       | 0.254          | 0.034        | 0.482        | 0.501         | 0.283       | 0.575        |
| 56            | 1.527              | 0.013         | 0.047      | 0.022        | 0.061         | 0.049       | 0.148          | 0.037        | 0.502        | 0.518         | 0.130       | 0.534        |
| 60            | 0.282              | 0.014         | 0.054      | 0.011        | 0.203         | 0.048       | 0.088          | 0.025        | 1.348        | 1.366         | 0.076       | 1.368        |
| 64            | -0.940             | 0.029         | 0.144      | 0.040        | 0.215         | 0.213       | 0.240          | 0.054        | 1.413        | 1.437         | 0.324       | 1.473        |
| 68            | -1.239             | 0.033         | 0.163      | 0.054        | 0.244         | 0.278       | 0.300          | 0.064        | 1.506        | 1.536         | 0.410       | 1.590        |

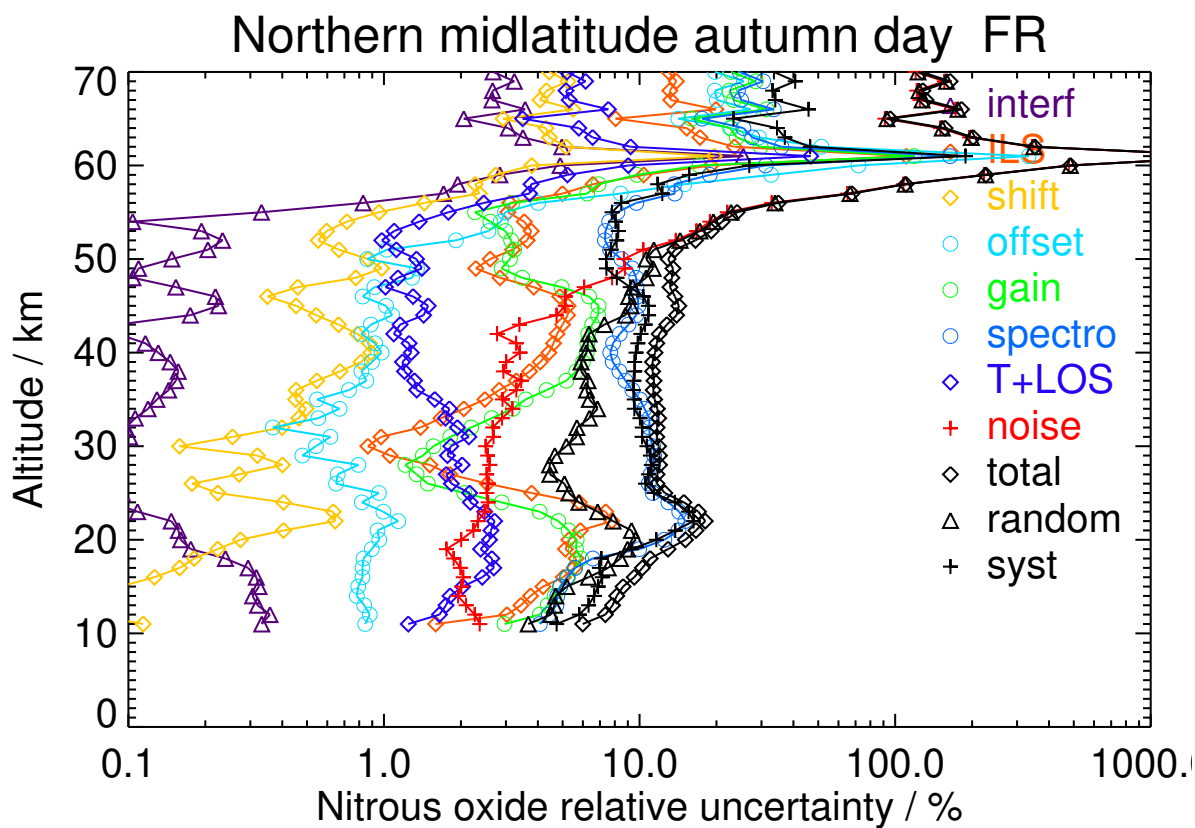

**Figure S151.** V8H\_N2O\_61 Northern midlatitude autumn day

**Table S152.** Nitrous oxide error budget for Northern midlatitude autumn night. All uncertainties are  $1\sigma$ .

| altitude<br>(km) | mean target<br>(ppbv) | interf<br>(ppbv) | ILS<br>(ppbv) | shift<br>(ppbv) | offset<br>(ppbv) | gain<br>(ppbv) | spectro<br>(ppbv) | T+LOS<br>(ppbv) | noise<br>(ppbv) | random<br>(ppbv) | syst<br>(ppbv) | total<br>(ppbv) |
|------------------|-----------------------|------------------|---------------|-----------------|------------------|----------------|-------------------|-----------------|-----------------|------------------|----------------|-----------------|
| 9                | 305.986               | 1.784            | 3.312         | 0.507           | 2.684            | 11.972         | 11.897            | 3.304           | 7.279           | 11.435           | 15.480         | 19.246          |
| 12               | 323.099               | 0.843            | 5.993         | 0.422           | 2.354            | 14.695         | 12.709            | 4.260           | 5.684           | 10.935           | 18.727         | 21.686          |
| 15               | 317.796               | 0.784            | 10.103        | 0.560           | 2.264            | 17.443         | 13.366            | 5.787           | 5.872           | 13.311           | 21.950         | 25.671          |
| 18               | 278.058               | 0.462            | 16.349        | 0.783           | 2.359            | 19.570         | 15.949            | 7.529           | 5.221           | 20.819           | 23.697         | 31.543          |
| 21               | 202.219               | 0.325            | 12.053        | 0.826           | 2.257            | 15.135         | 21.675            | 5.770           | 4.359           | 21.077           | 21.403         | 30.039          |
| 24               | 150.996               | 0.157            | 9.126         | 0.995           | 1.409            | 7.513          | 18.341            | 3.347           | 3.570           | 11.571           | 19.214         | 22.429          |
| 27               | 118.141               | 0.101            | 2.159         | 0.352           | 0.741            | 2.712          | 14.348            | 2.058           | 2.883           | 6.186            | 13.887         | 15.203          |
| 30               | 76.288                | 0.064            | 1.042         | 0.159           | 0.373            | 1.478          | 9.308             | 1.493           | 2.009           | 4.448            | 8.750          | 9.815           |
| 33               | 49.085                | 0.048            | 0.979         | 0.230           | 0.251            | 1.611          | 5.526             | 0.882           | 1.367           | 3.359            | 5.057          | 6.071           |
| 36               | 28.568                | 0.042            | 1.127         | 0.159           | 0.193            | 1.422          | 3.304             | 0.444           | 0.897           | 2.445            | 3.049          | 3.909           |
| 39               | 18.159                | 0.027            | 0.894         | 0.127           | 0.145            | 1.138          | 1.944             | 0.238           | 0.591           | 1.631            | 1.912          | 2.513           |
| 42               | 11.585                | 0.013            | 0.611         | 0.081           | 0.101            | 0.778          | 1.146             | 0.156           | 0.431           | 1.107            | 1.138          | 1.587           |
| 45               | 7.123                 | 0.015            | 0.385         | 0.040           | 0.076            | 0.463          | 0.729             | 0.120           | 0.428           | 0.749            | 0.734          | 1.049           |
| 48               | 3.753                 | 0.004            | 0.126         | 0.025           | 0.057            | 0.136          | 0.365             | 0.045           | 0.373           | 0.474            | 0.297          | 0.559           |
| 52               | 2.819                 | 0.008            | 0.137         | 0.017           | 0.063            | 0.131          | 0.222             | 0.033           | 0.479           | 0.518            | 0.228          | 0.566           |
| 56               | 1.585                 | 0.010            | 0.061         | 0.021           | 0.066            | 0.097          | 0.130             | 0.038           | 0.511           | 0.534            | 0.109          | 0.545           |
| 60               | 0.544                 | 0.016            | 0.096         | 0.016           | 0.209            | 0.113          | 0.116             | 0.030           | 1.317           | 1.345            | 0.086          | 1.347           |
| 64               | -0.318                | 0.027            | 0.145         | 0.036           | 0.233            | 0.222          | 0.210             | 0.047           | 1.450           | 1.486            | 0.261          | 1.509           |
| 68               | -0.643                | 0.025            | 0.140         | 0.040           | 0.251            | 0.237          | 0.219             | 0.047           | 1.517           | 1.555            | 0.272          | 1.578           |

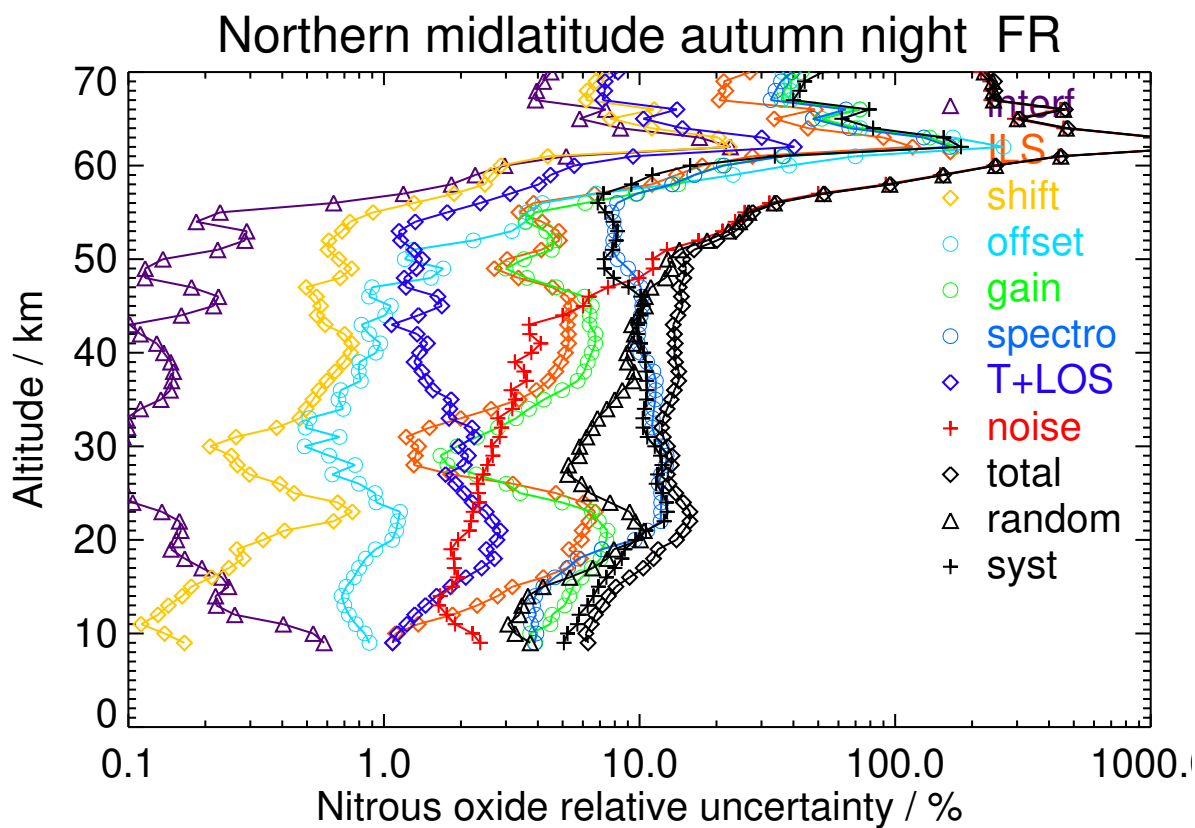

**Figure S152.** V8H\_N2O\_61 Northern midlatitude autumn night

**Table S153.** Nitrous oxide error budget for Tropics day. All uncertainties are  $1\sigma$ .

| altitude<br>(km) | mean target<br>(ppbv) | interf<br>(ppbv) | ILS<br>(ppbv) | shift<br>(ppbv) | offset<br>(ppbv) | gain<br>(ppbv) | spectro<br>(ppbv) | T+LOS<br>(ppbv) | noise<br>(ppbv) | random<br>(ppbv) | syst<br>(ppbv) | total<br>(ppbv) |
|------------------|-----------------------|------------------|---------------|-----------------|------------------|----------------|-------------------|-----------------|-----------------|------------------|----------------|-----------------|
| 12               | 339.045               | 1.133            | 11.457        | 1.384           | 2.415            | 13.349         | 17.333            | 5.042           | 7.605           | 14.154           | 22.402         | 26.499          |
| 15               | 342.644               | 1.590            | 17.717        | 2.232           | 3.521            | 10.696         | 23.521            | 8.735           | 9.470           | 16.961           | 29.661         | 34.167          |
| 18               | 320.546               | 1.160            | 12.006        | 1.824           | 3.118            | 7.629          | 16.328            | 7.478           | 8.009           | 15.747           | 18.854         | 24.564          |
| 21               | 284.343               | 0.519            | 4.141         | 0.527           | 2.369            | 3.881          | 21.962            | 5.072           | 6.481           | 9.823            | 22.180         | 24.258          |
| 24               | 270.109               | 0.192            | 6.618         | 0.832           | 1.233            | 5.271          | 24.586            | 3.695           | 4.500           | 6.970            | 25.761         | 26.687          |
| 27               | 236.494               | 0.111            | 2.021         | 0.884           | 0.902            | 4.368          | 22.989            | 3.148           | 3.697           | 5.996            | 23.257         | 24.018          |
| 30               | 196.282               | 0.088            | 2.024         | 0.507           | 0.565            | 4.212          | 19.044            | 2.548           | 2.775           | 5.326            | 19.259         | 19.982          |
| 33               | 142.918               | 0.073            | 1.232         | 0.710           | 0.449            | 3.178          | 12.808            | 1.739           | 2.148           | 3.869            | 13.001         | 13.565          |
| 36               | 90.103                | 0.068            | 2.490         | 0.570           | 0.409            | 2.850          | 7.447             | 0.917           | 1.336           | 2.450            | 8.179          | 8.538           |
| 39               | 49.489                | 0.057            | 2.347         | 0.350           | 0.324            | 2.614          | 4.446             | 0.501           | 0.800           | 1.415            | 5.588          | 5.765           |
| 42               | 24.588                | 0.019            | 1.667         | 0.202           | 0.246            | 1.997          | 2.718             | 0.308           | 0.610           | 1.291            | 3.613          | 3.837           |
| 45               | 10.332                | 0.010            | 0.595         | 0.023           | 0.075            | 0.695          | 1.262             | 0.119           | 0.340           | 0.704            | 1.439          | 1.602           |
| 48               | 3.989                 | 0.008            | 0.094         | 0.068           | 0.047            | 0.163          | 0.425             | 0.079           | 0.298           | 0.443            | 0.349          | 0.564           |
| 52               | 2.479                 | 0.003            | 0.084         | 0.015           | 0.051            | 0.093          | 0.160             | 0.034           | 0.318           | 0.343            | 0.169          | 0.382           |
| 56               | 1.360                 | 0.009            | 0.118         | 0.029           | 0.092            | 0.164          | 0.197             | 0.037           | 0.642           | 0.673            | 0.224          | 0.709           |
| 60               | 0.209                 | 0.011            | 0.048         | 0.013           | 0.114            | 0.126          | 0.149             | 0.032           | 0.801           | 0.823            | 0.141          | 0.835           |
| 64               | -1.210                | 0.038            | 0.201         | 0.071           | 0.248            | 0.490          | 0.544             | 0.093           | 1.468           | 1.516            | 0.715          | 1.676           |
| 68               | -1.455                | 0.043            | 0.229         | 0.084           | 0.306            | 0.560          | 0.629             | 0.104           | 1.770           | 1.824            | 0.826          | 2.002           |

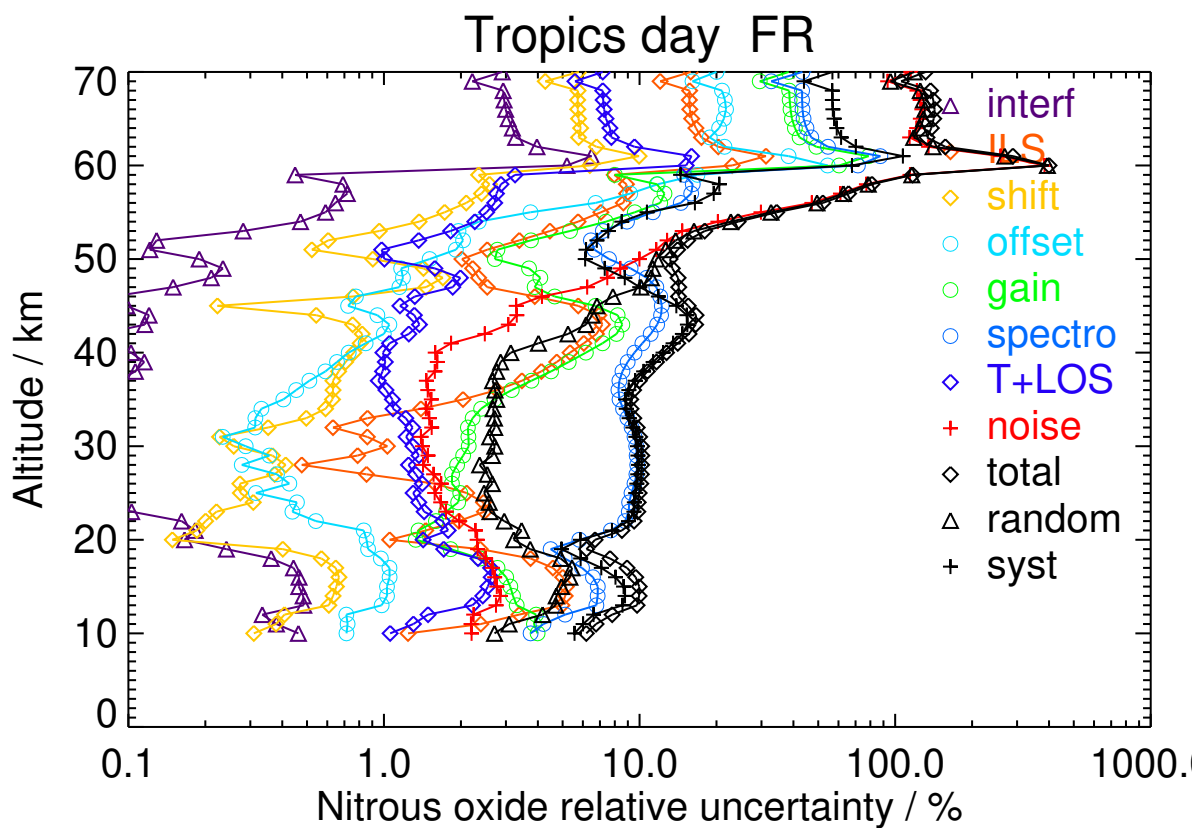

**Figure S153.** V8H\_N2O\_61 Tropics day

**Table S154.** Nitrous oxide error budget for Tropics night. All uncertainties are  $1\sigma$ .

| altitude (km) | mean target (ppbv) | interf (ppbv) | ILS (ppbv) | shift (ppbv) | offset (ppbv) | gain (ppbv) | spectro (ppbv) | T+LOS (ppbv) | noise (ppbv) | random (ppbv) | syst (ppbv) | total (ppbv) |
|---------------|--------------------|---------------|------------|--------------|---------------|-------------|----------------|--------------|--------------|---------------|-------------|--------------|
| 12            | 338.906            | 1.175         | 3.068      | 0.928        | 2.022         | 15.548      | 14.909         | 4.132        | 7.181        | 11.083        | 20.629      | 23.418       |
| 15            | 339.080            | 1.625         | 12.064     | 2.845        | 3.370         | 10.229      | 18.782         | 7.564        | 9.005        | 19.311        | 19.759      | 27.628       |
| 18            | 327.831            | 1.294         | 8.719      | 2.363        | 3.322         | 8.160       | 16.584         | 6.937        | 8.320        | 16.126        | 17.123      | 23.521       |
| 21            | 298.023            | 0.587         | 4.520      | 0.711        | 2.417         | 4.182       | 24.741         | 5.079        | 6.816        | 10.032        | 25.066      | 26.999       |
| 24            | 275.612            | 0.223         | 4.471      | 0.628        | 1.247         | 5.098       | 24.461         | 3.812        | 4.628        | 6.841         | 25.209      | 26.121       |
| 27            | 248.078            | 0.116         | 0.796      | 1.025        | 0.905         | 4.999       | 21.788         | 3.175        | 3.719        | 5.751         | 22.205      | 22.937       |
| 30            | 213.112            | 0.092         | 1.613      | 0.620        | 0.599         | 4.441       | 20.258         | 2.760        | 2.836        | 4.993         | 20.596      | 21.192       |
| 33            | 155.545            | 0.081         | 1.662      | 0.793        | 0.451         | 3.201       | 13.213         | 1.818        | 2.259        | 3.675         | 13.541      | 14.030       |
| 36            | 99.971             | 0.076         | 2.552      | 0.554        | 0.444         | 3.046       | 7.674          | 0.960        | 1.431        | 2.408         | 8.506       | 8.840        |
| 39            | 54.845             | 0.066         | 2.253      | 0.368        | 0.319         | 2.591       | 4.597          | 0.550        | 0.877        | 1.437         | 5.672       | 5.851        |
| 42            | 26.277             | 0.016         | 1.544      | 0.215        | 0.222         | 1.929       | 2.734          | 0.289        | 0.583        | 1.076         | 3.597       | 3.755        |
| 45            | 11.233             | 0.016         | 0.691      | 0.045        | 0.094         | 0.831       | 1.364          | 0.135        | 0.394        | 0.681         | 1.658       | 1.793        |
| 48            | 3.931              | 0.009         | 0.113      | 0.078        | 0.049         | 0.167       | 0.419          | 0.086        | 0.304        | 0.434         | 0.369       | 0.570        |
| 52            | 2.450              | 0.003         | 0.068      | 0.013        | 0.055         | 0.075       | 0.136          | 0.029        | 0.336        | 0.354         | 0.142       | 0.381        |
| 56            | 1.411              | 0.008         | 0.130      | 0.034        | 0.075         | 0.187       | 0.197          | 0.036        | 0.530        | 0.555         | 0.267       | 0.616        |
| 60            | 0.275              | 0.006         | 0.019      | 0.008        | 0.110         | 0.054       | 0.082          | 0.023        | 0.781        | 0.792         | 0.079       | 0.796        |
| 64            | -1.056             | 0.042         | 0.238      | 0.088        | 0.233         | 0.591       | 0.653          | 0.108        | 1.360        | 1.427         | 0.849       | 1.660        |
| 68            | -1.251             | 0.048         | 0.271      | 0.106        | 0.301         | 0.687       | 0.769          | 0.125        | 1.724        | 1.799         | 0.996       | 2.056        |

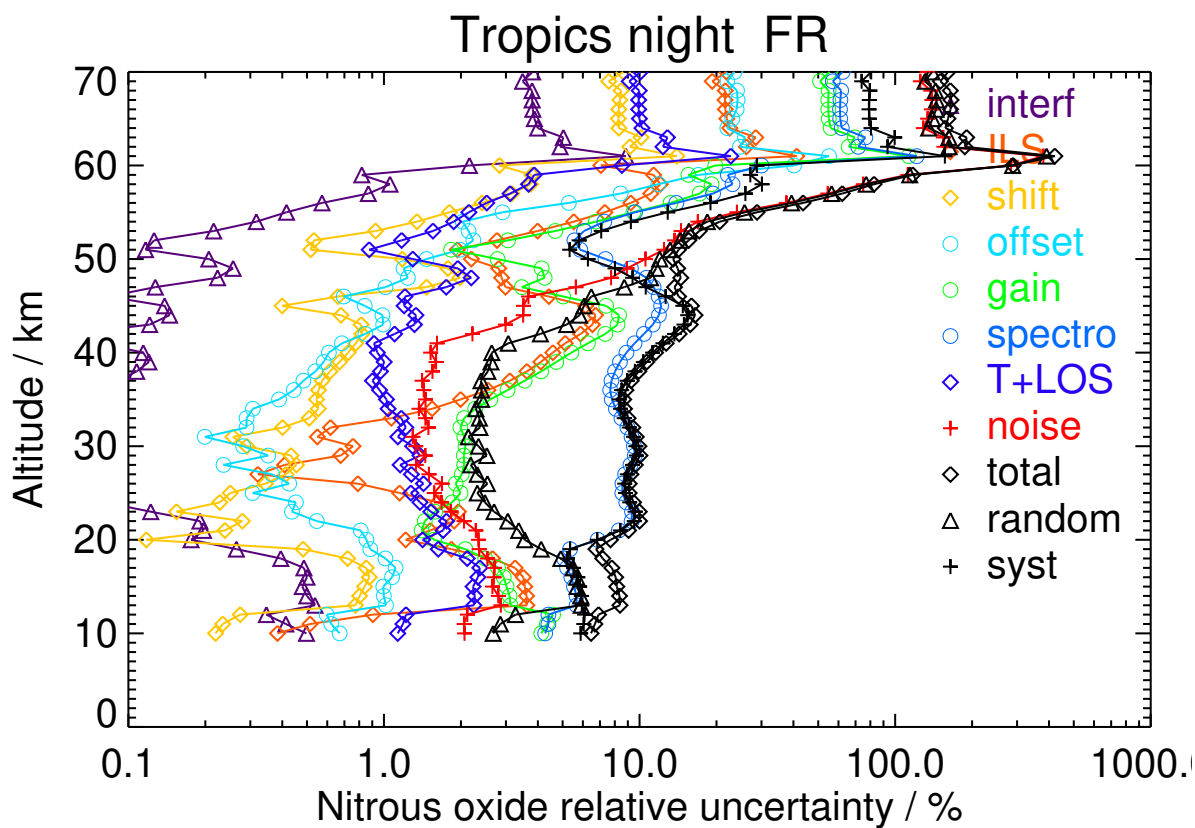

**Figure S154.** V8H\_N2O\_61 Tropics night

**Table S155.** Nitrous oxide error budget for Southern midlatitude winter day. All uncertainties are  $1\sigma$ .

| altitude<br>(km) | mean target<br>(ppbv) | interf<br>(ppbv) | ILS<br>(ppbv) | shift<br>(ppbv) | offset<br>(ppbv) | gain<br>(ppbv) | spectro<br>(ppbv) | T+LOS<br>(ppbv) | noise<br>(ppbv) | random<br>(ppbv) | syst<br>(ppbv) | total<br>(ppbv) |
|------------------|-----------------------|------------------|---------------|-----------------|------------------|----------------|-------------------|-----------------|-----------------|------------------|----------------|-----------------|
| 9                | 317.458               | 2.966            | 2.464         | 0.341           | 3.085            | 11.436         | 12.508            | 4.663           | 8.069           | 11.606           | 16.245         | 19.965          |
| 12               | 302.769               | 0.692            | 4.838         | 0.365           | 2.291            | 11.664         | 12.666            | 4.600           | 6.119           | 10.081           | 16.814         | 19.605          |
| 15               | 293.801               | 0.667            | 8.686         | 0.558           | 1.963            | 13.524         | 13.690            | 5.982           | 5.687           | 11.310           | 19.763         | 22.771          |
| 18               | 277.230               | 0.480            | 16.436        | 0.893           | 2.368            | 20.529         | 14.634            | 9.558           | 5.582           | 17.798           | 26.798         | 32.170          |
| 21               | 232.914               | 0.431            | 5.328         | 0.987           | 2.196            | 16.013         | 20.403            | 5.574           | 4.703           | 11.979           | 24.834         | 27.573          |
| 24               | 171.451               | 0.220            | 6.214         | 1.504           | 1.350            | 8.797          | 21.298            | 3.301           | 4.101           | 9.482            | 22.617         | 24.525          |
| 27               | 142.070               | 0.144            | 2.111         | 0.697           | 0.862            | 4.730          | 15.355            | 2.590           | 3.536           | 6.751            | 15.411         | 16.825          |
| 30               | 110.185               | 0.096            | 1.261         | 0.363           | 0.522            | 2.715          | 14.781            | 2.291           | 2.739           | 6.682            | 13.999         | 15.512          |
| 33               | 45.146                | 0.045            | 1.892         | 0.219           | 0.292            | 1.196          | 8.031             | 1.270           | 1.685           | 4.420            | 7.386          | 8.608           |
| 36               | 17.891                | 0.032            | 0.885         | 0.115           | 0.161            | 0.828          | 2.994             | 0.457           | 0.945           | 2.293            | 2.513          | 3.402           |
| 39               | 7.097                 | 0.011            | 0.412         | 0.072           | 0.066            | 0.381          | 1.347             | 0.182           | 0.535           | 1.137            | 1.080          | 1.568           |
| 42               | 2.650                 | 0.008            | 0.146         | 0.037           | 0.048            | 0.225          | 0.384             | 0.085           | 0.331           | 0.535            | 0.232          | 0.583           |
| 45               | 2.329                 | 0.009            | 0.131         | 0.054           | 0.079            | 0.399          | 0.156             | 0.093           | 0.370           | 0.543            | 0.246          | 0.596           |
| 48               | 1.899                 | 0.003            | 0.046         | 0.012           | 0.064            | 0.076          | 0.153             | 0.023           | 0.428           | 0.453            | 0.118          | 0.468           |
| 52               | 1.671                 | 0.007            | 0.100         | 0.017           | 0.073            | 0.076          | 0.135             | 0.027           | 0.544           | 0.568            | 0.113          | 0.580           |
| 56               | 1.078                 | 0.013            | 0.100         | 0.026           | 0.082            | 0.119          | 0.102             | 0.042           | 0.575           | 0.606            | 0.089          | 0.612           |
| 60               | 0.452                 | 0.019            | 0.110         | 0.027           | 0.212            | 0.089          | 0.105             | 0.036           | 1.368           | 1.395            | 0.061          | 1.396           |
| 64               | -0.232                | 0.022            | 0.107         | 0.033           | 0.237            | 0.120          | 0.115             | 0.038           | 1.488           | 1.516            | 0.109          | 1.520           |
| 68               | -0.257                | 0.015            | 0.059         | 0.024           | 0.257            | 0.158          | 0.089             | 0.037           | 1.536           | 1.564            | 0.135          | 1.570           |

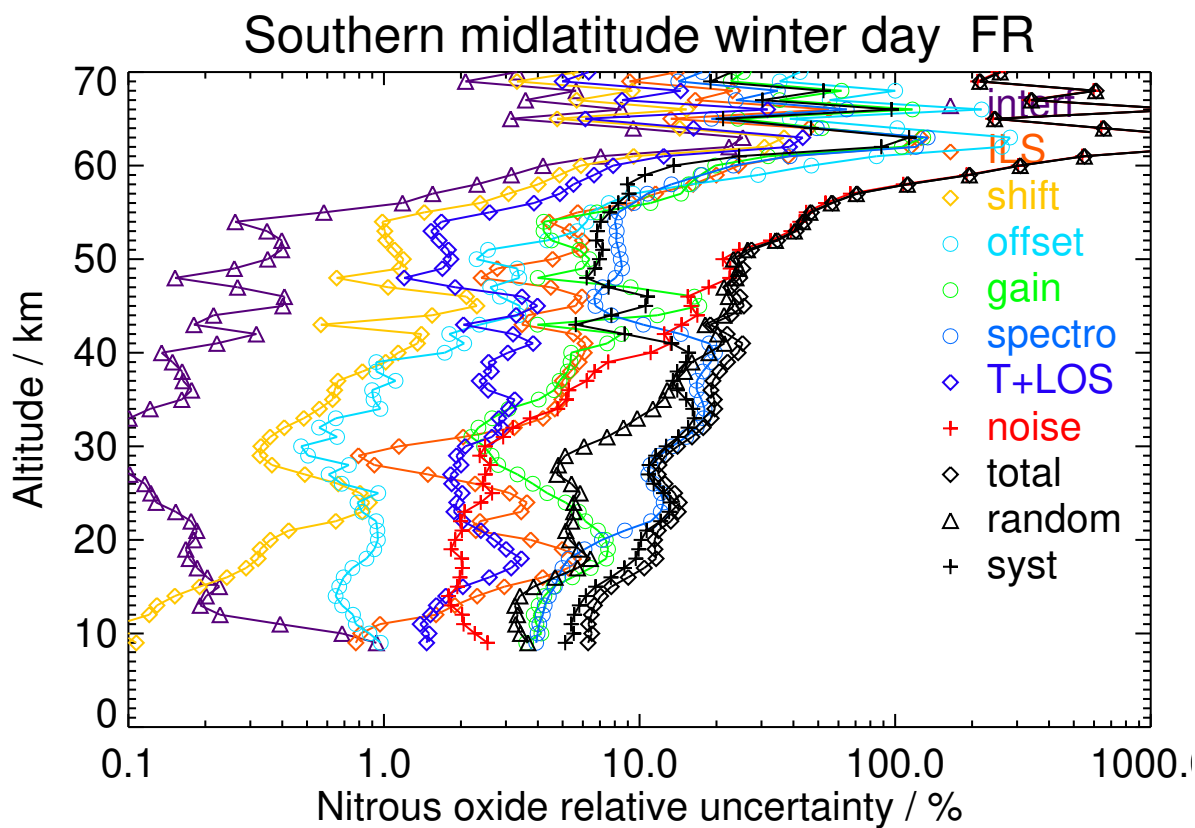

**Figure S155.** V8H\_N2O\_61 Southern midlatitude winter day

**Table S156.** Nitrous oxide error budget for Southern midlatitude winter night. All uncertainties are  $1\sigma$ .

| altitude<br>(km) | mean target<br>(ppbv) | interf<br>(ppbv) | ILS<br>(ppbv) | shift<br>(ppbv) | offset<br>(ppbv) | gain<br>(ppbv) | spectro<br>(ppbv) | T+LOS<br>(ppbv) | noise<br>(ppbv) | random<br>(ppbv) | syst<br>(ppbv) | total<br>(ppbv) |
|------------------|-----------------------|------------------|---------------|-----------------|------------------|----------------|-------------------|-----------------|-----------------|------------------|----------------|-----------------|
| 9                | 315.983               | 3.334            | 2.130         | 0.274           | 3.022            | 12.635         | 12.355            | 4.785           | 7.648           | 12.423           | 16.254         | 20.458          |
| 12               | 309.977               | 0.880            | 5.113         | 0.315           | 2.131            | 12.508         | 12.162            | 4.009           | 5.628           | 10.574           | 16.487         | 19.587          |
| 15               | 295.714               | 0.769            | 9.649         | 0.634           | 1.982            | 12.988         | 14.059            | 5.168           | 5.426           | 14.269           | 17.802         | 22.815          |
| 18               | 261.545               | 0.536            | 11.170        | 0.710           | 2.089            | 15.317         | 15.323            | 6.226           | 5.167           | 16.213           | 20.049         | 25.784          |
| 21               | 202.054               | 0.313            | 6.941         | 0.760           | 1.703            | 10.691         | 20.017            | 4.424           | 4.345           | 14.413           | 19.936         | 24.601          |
| 24               | 152.534               | 0.133            | 7.717         | 1.146           | 1.464            | 8.301          | 18.110            | 3.561           | 4.034           | 12.214           | 18.430         | 22.110          |
| 27               | 126.487               | 0.103            | 2.238         | 0.351           | 0.924            | 3.903          | 13.530            | 2.445           | 3.351           | 7.401            | 12.913         | 14.883          |
| 30               | 97.602                | 0.084            | 1.166         | 0.308           | 0.498            | 2.145          | 12.291            | 1.996           | 2.468           | 6.476            | 11.204         | 12.941          |
| 33               | 45.950                | 0.044            | 1.544         | 0.190           | 0.268            | 1.649          | 7.143             | 1.148           | 1.555           | 4.211            | 6.499          | 7.744           |
| 36               | 17.836                | 0.029            | 0.838         | 0.093           | 0.171            | 1.088          | 2.882             | 0.452           | 0.876           | 2.269            | 2.461          | 3.347           |
| 39               | 7.550                 | 0.009            | 0.426         | 0.066           | 0.067            | 0.483          | 1.177             | 0.184           | 0.481           | 0.961            | 1.072          | 1.440           |
| 42               | 2.593                 | 0.006            | 0.140         | 0.021           | 0.036            | 0.127          | 0.384             | 0.079           | 0.319           | 0.456            | 0.293          | 0.542           |
| 45               | 2.259                 | 0.004            | 0.048         | 0.015           | 0.053            | 0.112          | 0.163             | 0.061           | 0.362           | 0.406            | 0.119          | 0.423           |
| 48               | 2.039                 | 0.004            | 0.041         | 0.009           | 0.062            | 0.048          | 0.121             | 0.019           | 0.419           | 0.436            | 0.093          | 0.446           |
| 52               | 1.999                 | 0.010            | 0.112         | 0.019           | 0.066            | 0.111          | 0.162             | 0.029           | 0.521           | 0.549            | 0.163          | 0.573           |
| 56               | 1.253                 | 0.021            | 0.082         | 0.024           | 0.085            | 0.121          | 0.133             | 0.039           | 0.599           | 0.634            | 0.075          | 0.639           |
| 60               | 0.683                 | 0.029            | 0.135         | 0.029           | 0.235            | 0.145          | 0.152             | 0.043           | 1.442           | 1.479            | 0.121          | 1.484           |
| 64               | 0.214                 | 0.028            | 0.124         | 0.029           | 0.267            | 0.164          | 0.162             | 0.045           | 1.636           | 1.671            | 0.167          | 1.679           |
| 68               | 0.051                 | 0.025            | 0.118         | 0.027           | 0.261            | 0.170          | 0.164             | 0.040           | 1.607           | 1.642            | 0.173          | 1.651           |

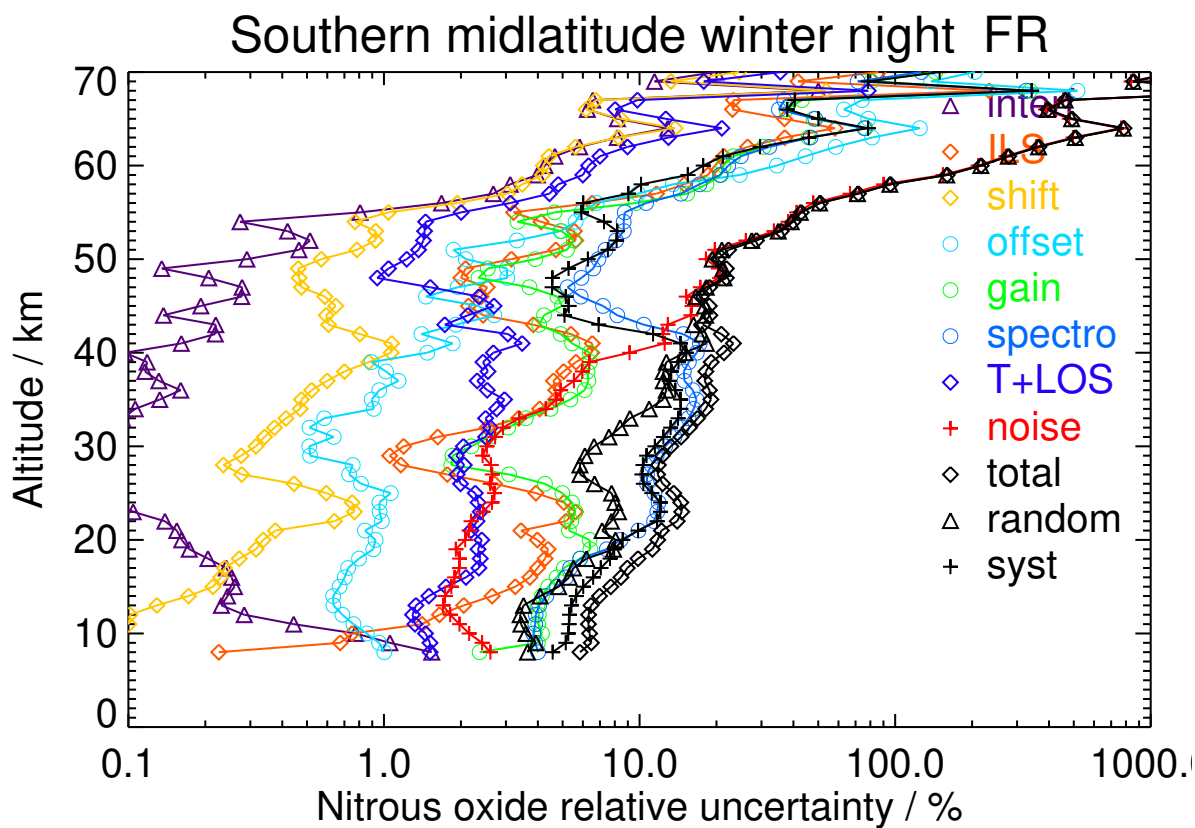

**Figure S156.** V8H\_N2O\_61 Southern midlatitude winter night



**Table S157.** Nitrous oxide error budget for Southern midlatitude spring day. All uncertainties are  $1\sigma$ .

| altitude<br>(km) | mean target<br>(ppbv) | interf<br>(ppbv) | ILS<br>(ppbv) | shift<br>(ppbv) | offset<br>(ppbv) | gain<br>(ppbv) | spectro<br>(ppbv) | T+LOS<br>(ppbv) | noise<br>(ppbv) | random<br>(ppbv) | syst<br>(ppbv) | total<br>(ppbv) |
|------------------|-----------------------|------------------|---------------|-----------------|------------------|----------------|-------------------|-----------------|-----------------|------------------|----------------|-----------------|
| 9                | 288.307               | 3.389            | 1.985         | 0.467           | 2.533            | 6.812          | 13.327            | 3.812           | 7.782           | 11.573           | 13.682         | 17.921          |
| 12               | 302.168               | 1.210            | 5.694         | 0.268           | 2.033            | 13.451         | 13.678            | 4.512           | 5.580           | 13.168           | 16.858         | 21.392          |
| 15               | 280.625               | 1.133            | 10.322        | 0.463           | 2.415            | 16.732         | 16.998            | 6.345           | 6.151           | 21.389           | 17.417         | 27.584          |
| 18               | 259.269               | 0.668            | 22.177        | 1.266           | 3.190            | 25.874         | 18.698            | 9.353           | 5.132           | 32.027           | 24.722         | 40.459          |
| 21               | 182.433               | 0.352            | 12.609        | 1.140           | 2.043            | 15.501         | 21.077            | 5.395           | 4.105           | 22.506           | 19.712         | 29.918          |
| 24               | 140.118               | 0.147            | 10.070        | 1.548           | 1.403            | 9.776          | 17.459            | 3.263           | 3.432           | 15.915           | 16.592         | 22.991          |
| 27               | 133.851               | 0.130            | 4.138         | 0.360           | 0.971            | 5.366          | 15.314            | 2.220           | 2.799           | 11.008           | 13.157         | 17.155          |
| 30               | 100.567               | 0.097            | 1.636         | 0.226           | 0.451            | 2.135          | 12.974            | 1.662           | 2.149           | 6.943            | 11.619         | 13.536          |
| 33               | 42.536                | 0.047            | 1.438         | 0.154           | 0.220            | 0.970          | 6.155             | 1.062           | 1.288           | 3.656            | 5.512          | 6.614           |
| 36               | 20.695                | 0.042            | 0.708         | 0.117           | 0.141            | 0.962          | 2.081             | 0.385           | 0.753           | 1.682            | 1.918          | 2.551           |
| 39               | 13.863                | 0.022            | 0.525         | 0.089           | 0.105            | 0.759          | 1.169             | 0.178           | 0.475           | 1.011            | 1.214          | 1.580           |
| 42               | 10.759                | 0.013            | 0.399         | 0.094           | 0.097            | 0.687          | 0.729             | 0.143           | 0.386           | 0.752            | 0.886          | 1.162           |
| 45               | 7.537                 | 0.017            | 0.253         | 0.082           | 0.117            | 0.736          | 0.576             | 0.141           | 0.393           | 0.803            | 0.698          | 1.064           |
| 48               | 5.020                 | 0.006            | 0.138         | 0.019           | 0.061            | 0.331          | 0.410             | 0.055           | 0.319           | 0.498            | 0.397          | 0.637           |
| 52               | 2.733                 | 0.008            | 0.110         | 0.019           | 0.045            | 0.130          | 0.240             | 0.033           | 0.366           | 0.411            | 0.234          | 0.473           |
| 56               | 1.144                 | 0.008            | 0.049         | 0.018           | 0.055            | 0.063          | 0.126             | 0.033           | 0.411           | 0.430            | 0.104          | 0.442           |
| 60               | 0.705                 | 0.017            | 0.071         | 0.018           | 0.188            | 0.122          | 0.094             | 0.027           | 1.099           | 1.124            | 0.098          | 1.129           |
| 64               | -0.229                | 0.031            | 0.135         | 0.046           | 0.220            | 0.329          | 0.217             | 0.053           | 1.297           | 1.345            | 0.320          | 1.382           |
| 68               | -0.239                | 0.038            | 0.131         | 0.064           | 0.230            | 0.285          | 0.216             | 0.052           | 1.372           | 1.406            | 0.337          | 1.445           |

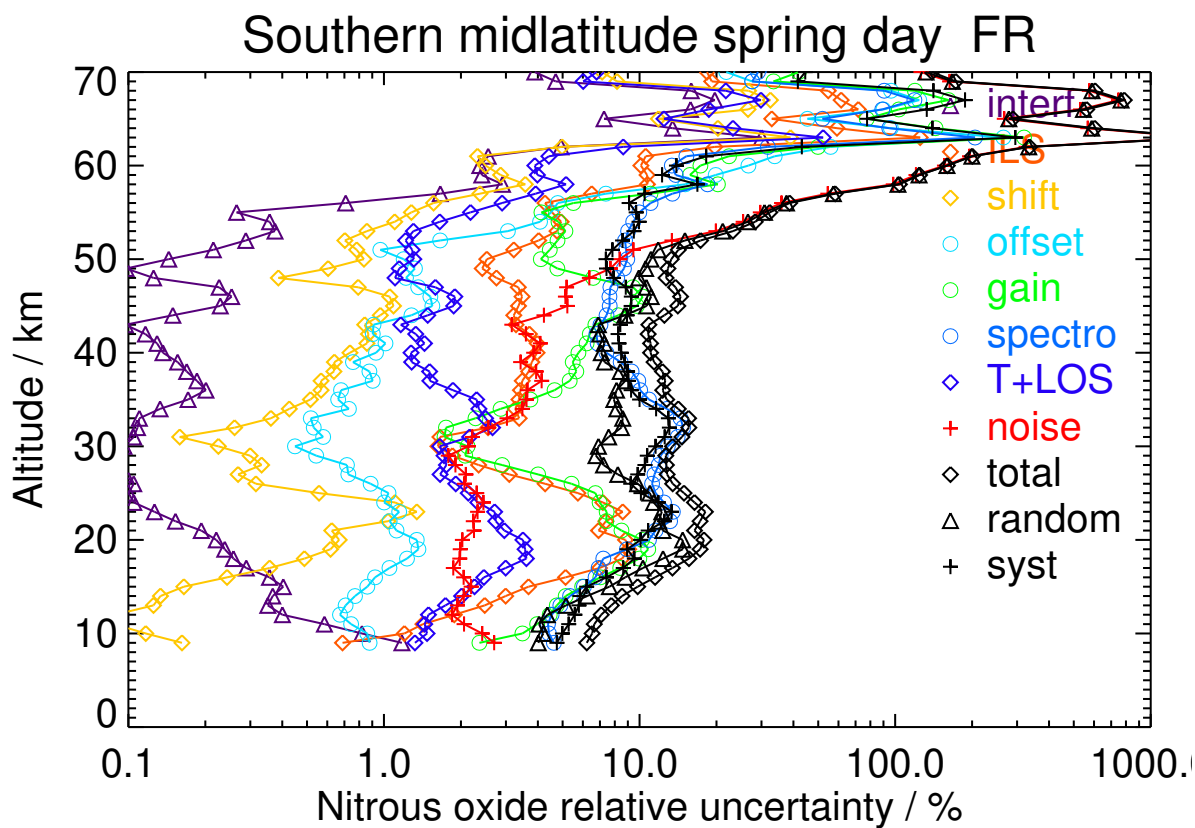

**Figure S157.** V8H\_N2O\_61 Southern midlatitude spring day



**Table S158.** Nitrous oxide error budget for Southern midlatitude spring night. All uncertainties are  $1\sigma$ .

| altitude<br>(km) | mean target<br>(ppbv) | interf<br>(ppbv) | ILS<br>(ppbv) | shift<br>(ppbv) | offset<br>(ppbv) | gain<br>(ppbv) | spectro<br>(ppbv) | T+LOS<br>(ppbv) | noise<br>(ppbv) | random<br>(ppbv) | syst<br>(ppbv) | total<br>(ppbv) |
|------------------|-----------------------|------------------|---------------|-----------------|------------------|----------------|-------------------|-----------------|-----------------|------------------|----------------|-----------------|
| 9                | 287.350               | 2.678            | 2.682         | 0.553           | 2.658            | 9.125          | 12.787            | 3.852           | 8.167           | 13.808           | 12.625         | 18.709          |
| 12               | 304.079               | 0.768            | 7.740         | 0.434           | 1.993            | 15.801         | 12.644            | 4.118           | 5.223           | 14.532           | 17.529         | 22.769          |
| 15               | 293.887               | 0.726            | 14.337        | 0.778           | 2.647            | 22.852         | 15.701            | 6.892           | 6.144           | 22.734           | 23.470         | 32.675          |
| 18               | 287.332               | 0.389            | 27.748        | 1.952           | 3.231            | 33.079         | 14.099            | 11.621          | 5.143           | 28.752           | 37.579         | 47.316          |
| 21               | 237.493               | 0.392            | 14.035        | 0.859           | 3.184            | 26.878         | 18.306            | 7.481           | 4.238           | 23.422           | 28.122         | 36.599          |
| 24               | 195.372               | 0.216            | 7.758         | 2.028           | 1.867            | 15.414         | 18.724            | 3.538           | 3.667           | 15.333           | 21.140         | 26.115          |
| 27               | 183.470               | 0.123            | 3.276         | 0.673           | 0.902            | 7.002          | 15.988            | 2.446           | 2.984           | 8.500            | 16.103         | 18.209          |
| 30               | 143.229               | 0.102            | 1.815         | 0.348           | 0.474            | 3.801          | 16.234            | 2.088           | 2.363           | 5.383            | 16.205         | 17.076          |
| 33               | 63.517                | 0.045            | 2.320         | 0.196           | 0.286            | 1.172          | 9.612             | 1.582           | 1.519           | 3.988            | 9.389          | 10.201          |
| 36               | 22.389                | 0.046            | 0.913         | 0.101           | 0.135            | 0.675          | 3.007             | 0.620           | 0.878           | 1.939            | 2.786          | 3.394           |
| 39               | 12.973                | 0.021            | 0.457         | 0.110           | 0.104            | 0.691          | 1.052             | 0.227           | 0.539           | 0.875            | 1.180          | 1.469           |
| 42               | 9.566                 | 0.010            | 0.346         | 0.107           | 0.115            | 0.743          | 0.683             | 0.168           | 0.458           | 0.741            | 0.923          | 1.184           |
| 45               | 6.496                 | 0.015            | 0.234         | 0.075           | 0.110            | 0.679          | 0.523             | 0.133           | 0.401           | 0.742            | 0.660          | 0.993           |
| 48               | 4.299                 | 0.008            | 0.137         | 0.042           | 0.066            | 0.413          | 0.333             | 0.068           | 0.315           | 0.497            | 0.405          | 0.641           |
| 52               | 2.516                 | 0.005            | 0.071         | 0.017           | 0.039            | 0.099          | 0.185             | 0.030           | 0.347           | 0.370            | 0.189          | 0.415           |
| 56               | 1.422                 | 0.005            | 0.054         | 0.015           | 0.058            | 0.056          | 0.116             | 0.028           | 0.425           | 0.439            | 0.111          | 0.453           |
| 60               | 0.360                 | 0.013            | 0.062         | 0.015           | 0.181            | 0.154          | 0.082             | 0.029           | 1.012           | 1.040            | 0.106          | 1.045           |
| 64               | -0.416                | 0.022            | 0.056         | 0.029           | 0.219            | 0.275          | 0.124             | 0.044           | 1.241           | 1.278            | 0.228          | 1.298           |
| 68               | -0.549                | 0.025            | 0.082         | 0.040           | 0.230            | 0.261          | 0.135             | 0.050           | 1.340           | 1.372            | 0.253          | 1.395           |

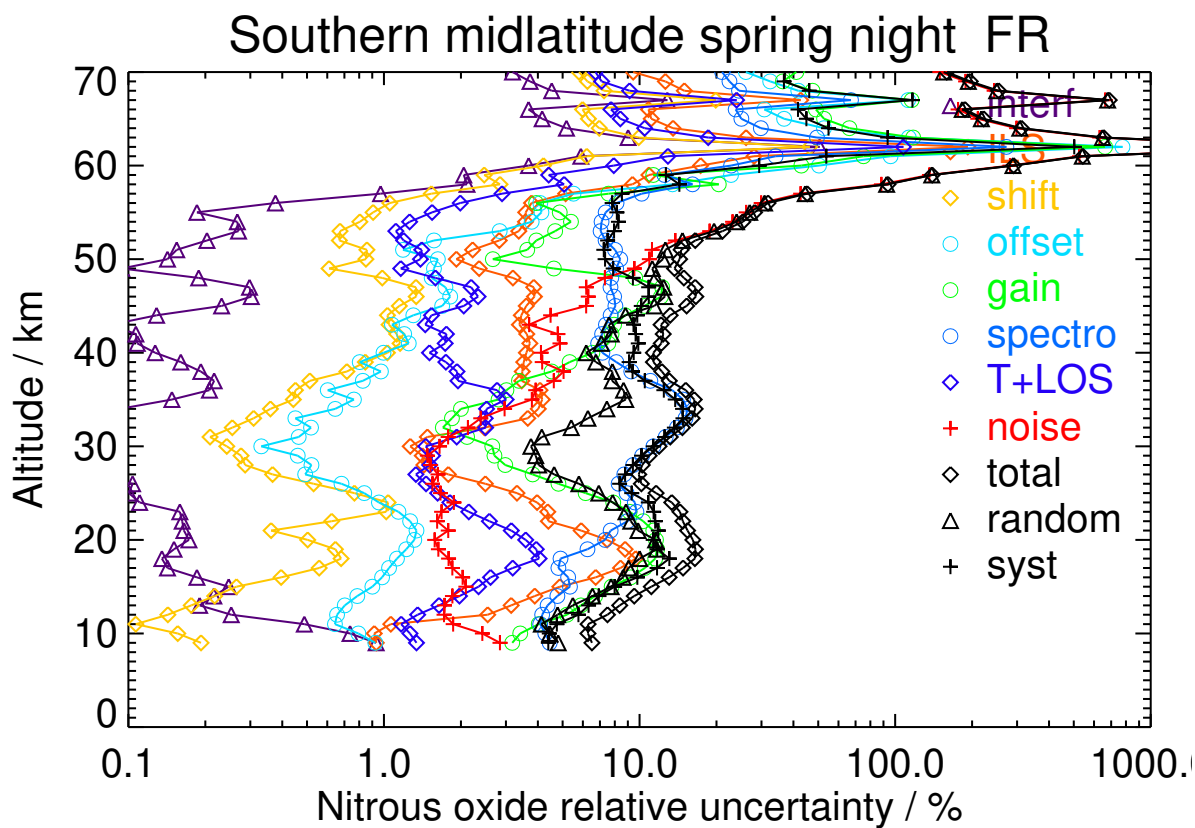

**Figure S158.** V8H\_N2O\_61 Southern midlatitude spring night

**Table S159.** Nitrous oxide error budget for Southern midlatitude summer day. All uncertainties are  $1\sigma$ .

| altitude<br>(km) | mean target<br>(ppbv) | interf<br>(ppbv) | ILS<br>(ppbv) | shift<br>(ppbv) | offset<br>(ppbv) | gain<br>(ppbv) | spectro<br>(ppbv) | T+LOS<br>(ppbv) | noise<br>(ppbv) | random<br>(ppbv) | syst<br>(ppbv) | total<br>(ppbv) |
|------------------|-----------------------|------------------|---------------|-----------------|------------------|----------------|-------------------|-----------------|-----------------|------------------|----------------|-----------------|
| 9                | 301.920               | 3.020            | 2.439         | 0.409           | 2.566            | 10.339         | 12.232            | 3.770           | 7.759           | 13.223           | 13.338         | 18.781          |
| 12               | 306.812               | 1.181            | 5.179         | 0.239           | 1.840            | 14.753         | 12.356            | 3.835           | 5.062           | 12.981           | 16.547         | 21.031          |
| 15               | 290.313               | 0.964            | 8.162         | 0.324           | 1.825            | 13.326         | 15.828            | 4.946           | 5.368           | 16.498           | 16.739         | 23.503          |
| 18               | 237.148               | 0.438            | 6.400         | 0.319           | 1.215            | 7.780          | 19.311            | 4.794           | 4.296           | 12.886           | 18.750         | 22.751          |
| 21               | 171.735               | 0.205            | 14.637        | 0.685           | 1.377            | 6.789          | 22.883            | 5.089           | 3.933           | 9.073            | 27.303         | 28.771          |
| 24               | 144.412               | 0.131            | 10.614        | 0.767           | 1.041            | 3.653          | 17.392            | 3.306           | 3.420           | 6.017            | 20.411         | 21.279          |
| 27               | 115.739               | 0.088            | 1.899         | 0.491           | 0.565            | 1.449          | 11.783            | 1.921           | 2.705           | 3.860            | 11.884         | 12.495          |
| 30               | 81.415                | 0.090            | 0.654         | 0.250           | 0.299            | 1.576          | 7.732             | 1.274           | 1.873           | 2.647            | 7.810          | 8.246           |
| 33               | 51.694                | 0.058            | 0.692         | 0.274           | 0.188            | 0.988          | 4.407             | 0.764           | 1.212           | 1.622            | 4.518          | 4.800           |
| 36               | 29.312                | 0.050            | 1.137         | 0.201           | 0.150            | 1.099          | 2.355             | 0.355           | 0.730           | 0.950            | 2.805          | 2.962           |
| 39               | 16.936                | 0.015            | 0.890         | 0.117           | 0.087            | 0.873          | 1.476             | 0.188           | 0.440           | 0.631            | 1.893          | 1.996           |
| 42               | 8.042                 | 0.010            | 0.371         | 0.039           | 0.039            | 0.347          | 0.742             | 0.102           | 0.309           | 0.475            | 0.832          | 0.958           |
| 45               | 3.415                 | 0.015            | 0.160         | 0.021           | 0.036            | 0.114          | 0.326             | 0.085           | 0.293           | 0.356            | 0.336          | 0.489           |
| 48               | 1.736                 | 0.004            | 0.039         | 0.016           | 0.033            | 0.049          | 0.137             | 0.020           | 0.208           | 0.226            | 0.129          | 0.260           |
| 52               | 0.912                 | 0.007            | 0.058         | 0.012           | 0.044            | 0.047          | 0.084             | 0.015           | 0.298           | 0.319            | 0.046          | 0.322           |
| 56               | 0.639                 | 0.009            | 0.075         | 0.018           | 0.035            | 0.042          | 0.079             | 0.017           | 0.295           | 0.311            | 0.076          | 0.320           |
| 60               | 0.782                 | 0.009            | 0.119         | 0.030           | 0.139            | 0.042          | 0.118             | 0.021           | 0.867           | 0.882            | 0.159          | 0.896           |
| 64               | -0.456                | 0.033            | 0.142         | 0.055           | 0.145            | 0.235          | 0.282             | 0.038           | 0.953           | 0.976            | 0.373          | 1.044           |
| 68               | -1.007                | 0.050            | 0.243         | 0.094           | 0.231            | 0.355          | 0.458             | 0.055           | 1.371           | 1.405            | 0.607          | 1.531           |

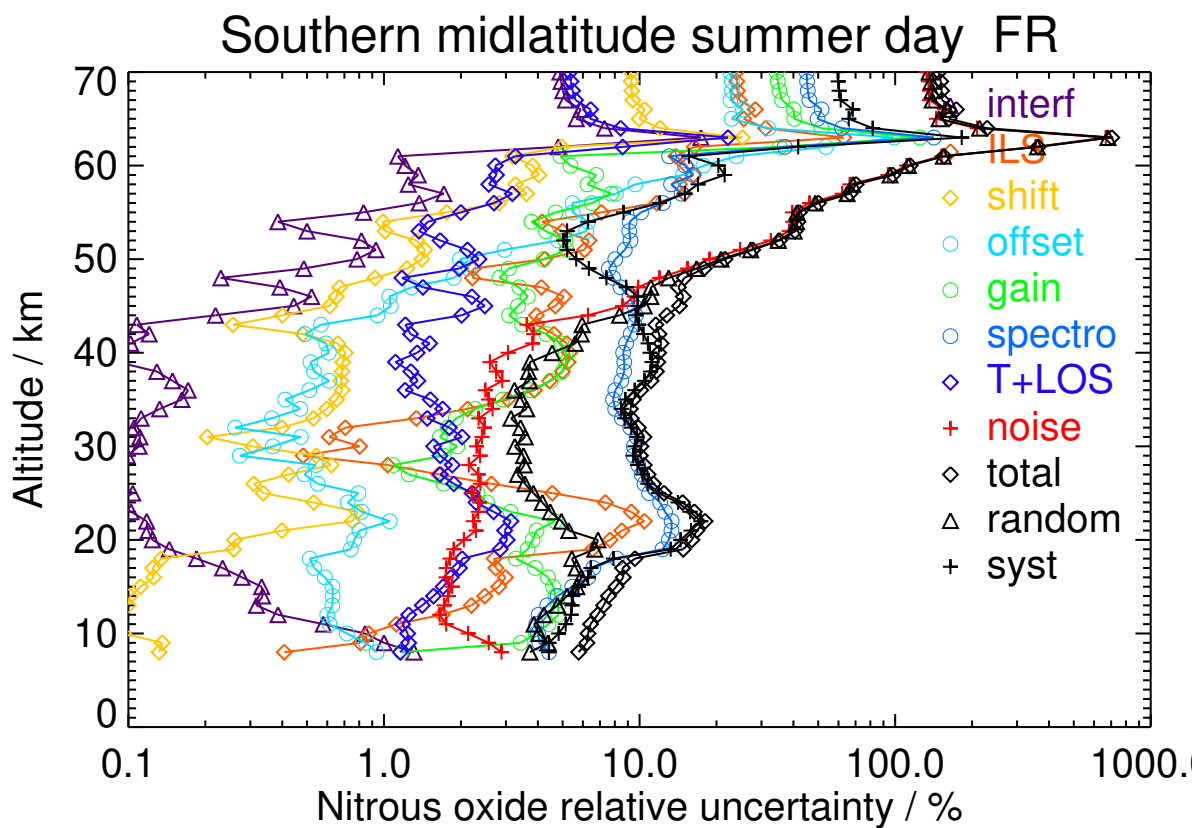

**Figure S159.** V8H\_N2O\_61 Southern midlatitude summer day

**Table S160.** Nitrous oxide error budget for Southern midlatitude summer night. All uncertainties are  $1\sigma$ .

| altitude<br>(km) | mean target<br>(ppbv) | interf<br>(ppbv) | ILS<br>(ppbv) | shift<br>(ppbv) | offset<br>(ppbv) | gain<br>(ppbv) | spectro<br>(ppbv) | T+LOS<br>(ppbv) | noise<br>(ppbv) | random<br>(ppbv) | syst<br>(ppbv) | total<br>(ppbv) |
|------------------|-----------------------|------------------|---------------|-----------------|------------------|----------------|-------------------|-----------------|-----------------|------------------|----------------|-----------------|
| 9                | 304.454               | 3.253            | 4.184         | 0.281           | 3.091            | 18.564         | 14.450            | 4.662           | 7.390           | 16.870           | 19.568         | 25.836          |
| 12               | 316.132               | 1.176            | 9.615         | 0.335           | 2.659            | 17.850         | 14.033            | 5.351           | 6.365           | 13.721           | 22.304         | 26.186          |
| 15               | 317.283               | 1.070            | 17.026        | 0.534           | 2.811            | 22.468         | 15.687            | 6.986           | 6.486           | 17.274           | 29.027         | 33.778          |
| 18               | 270.438               | 0.580            | 18.480        | 0.597           | 2.560            | 21.578         | 19.197            | 6.869           | 4.799           | 24.086           | 25.942         | 35.399          |
| 21               | 193.117               | 0.296            | 11.635        | 0.913           | 1.391            | 7.996          | 23.170            | 4.025           | 3.827           | 13.519           | 24.230         | 27.747          |
| 24               | 138.044               | 0.126            | 8.993         | 0.693           | 1.072            | 3.860          | 15.902            | 3.084           | 3.382           | 6.776            | 18.037         | 19.267          |
| 27               | 119.041               | 0.100            | 2.212         | 0.627           | 0.636            | 1.630          | 11.812            | 1.973           | 2.762           | 4.249            | 11.889         | 12.625          |
| 30               | 82.206                | 0.091            | 0.611         | 0.245           | 0.330            | 1.736          | 8.161             | 1.373           | 1.953           | 2.730            | 8.271          | 8.710           |
| 33               | 53.235                | 0.059            | 0.729         | 0.305           | 0.216            | 1.277          | 4.544             | 0.813           | 1.278           | 1.712            | 4.724          | 5.025           |
| 36               | 30.299                | 0.054            | 1.111         | 0.194           | 0.155            | 1.110          | 2.492             | 0.397           | 0.791           | 1.042            | 2.904          | 3.086           |
| 39               | 17.631                | 0.020            | 0.932         | 0.117           | 0.088            | 0.835          | 1.519             | 0.204           | 0.467           | 0.660            | 1.929          | 2.039           |
| 42               | 8.023                 | 0.013            | 0.414         | 0.039           | 0.045            | 0.354          | 0.798             | 0.111           | 0.331           | 0.481            | 0.910          | 1.029           |
| 45               | 3.106                 | 0.013            | 0.155         | 0.023           | 0.037            | 0.107          | 0.318             | 0.085           | 0.290           | 0.365            | 0.312          | 0.480           |
| 48               | 1.542                 | 0.004            | 0.034         | 0.015           | 0.030            | 0.032          | 0.108             | 0.020           | 0.198           | 0.210            | 0.102          | 0.234           |
| 52               | 0.926                 | 0.006            | 0.050         | 0.011           | 0.041            | 0.044          | 0.066             | 0.013           | 0.279           | 0.289            | 0.071          | 0.298           |
| 56               | 0.269                 | 0.010            | 0.040         | 0.012           | 0.033            | 0.036          | 0.056             | 0.014           | 0.295           | 0.305            | 0.038          | 0.307           |
| 60               | 0.528                 | 0.008            | 0.075         | 0.028           | 0.130            | 0.053          | 0.102             | 0.014           | 0.804           | 0.818            | 0.118          | 0.827           |
| 64               | -0.714                | 0.031            | 0.150         | 0.054           | 0.140            | 0.189          | 0.274             | 0.032           | 0.909           | 0.933            | 0.338          | 0.992           |
| 68               | -1.327                | 0.046            | 0.230         | 0.092           | 0.237            | 0.301          | 0.436             | 0.049           | 1.416           | 1.450            | 0.553          | 1.552           |

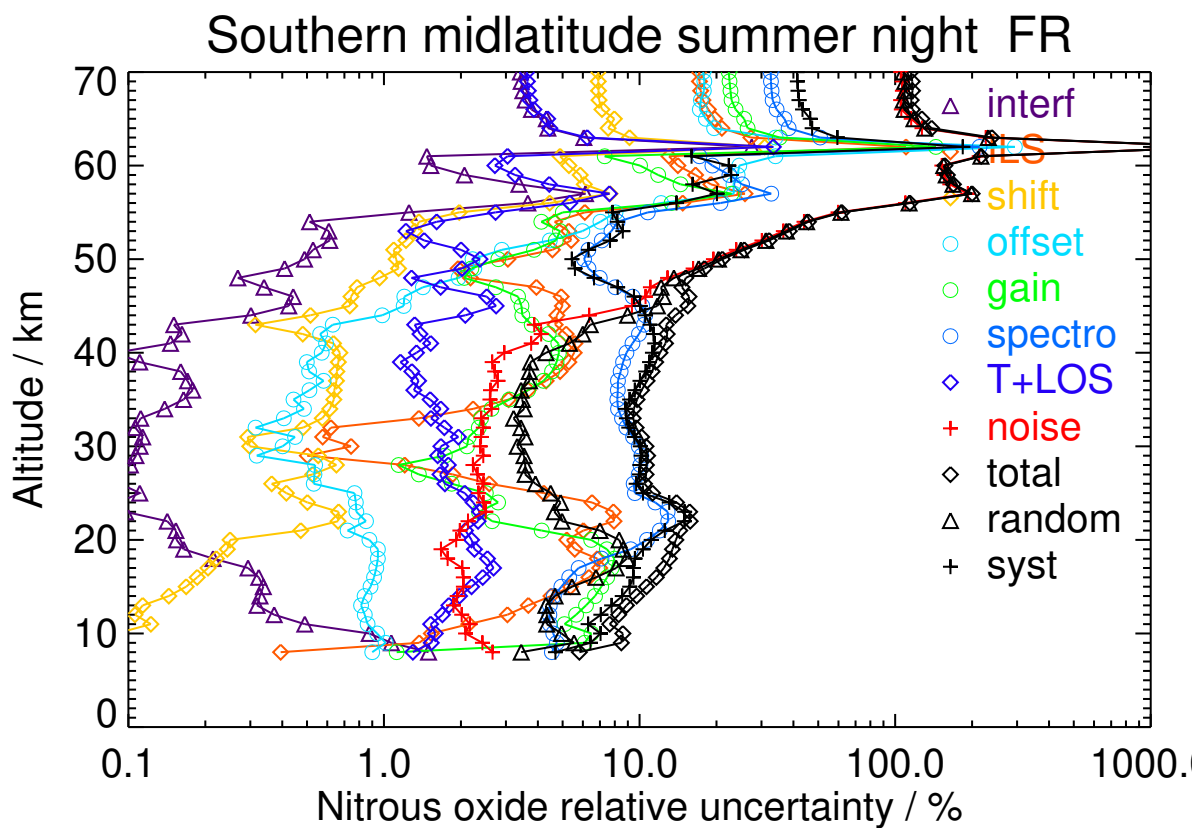

**Figure S160.** V8H\_N2O\_61 Southern midlatitude summer night

**Table S161.** Nitrous oxide error budget for Southern midlatitude autumn day. All uncertainties are  $1\sigma$ .

| altitude (km) | mean target (ppbv) | interf (ppbv) | ILS (ppbv) | shift (ppbv) | offset (ppbv) | gain (ppbv) | spectro (ppbv) | T+LOS (ppbv) | noise (ppbv) | random (ppbv) | syst (ppbv) | total (ppbv) |
|---------------|--------------------|---------------|------------|--------------|---------------|-------------|----------------|--------------|--------------|---------------|-------------|--------------|
| 12            | 314.527            | 0.863         | 5.447      | 0.324        | 2.188         | 13.274      | 12.590         | 3.960        | 5.604        | 10.323        | 17.622      | 20.423       |
| 15            | 303.224            | 0.685         | 9.620      | 0.506        | 2.256         | 15.580      | 14.508         | 5.458        | 5.767        | 14.359        | 20.210      | 24.792       |
| 18            | 263.133            | 0.265         | 9.092      | 0.604        | 2.830         | 20.515      | 19.083         | 4.988        | 4.467        | 18.207        | 24.279      | 30.348       |
| 21            | 192.936            | 0.282         | 8.422      | 1.510        | 2.204         | 13.414      | 22.398         | 3.892        | 3.601        | 15.169        | 23.617      | 28.069       |
| 24            | 144.939            | 0.149         | 4.107      | 0.445        | 1.465         | 7.249       | 15.858         | 2.862        | 3.247        | 9.842         | 15.656      | 18.493       |
| 27            | 108.978            | 0.109         | 1.255      | 0.489        | 0.810         | 2.076       | 12.214         | 1.993        | 2.730        | 5.193         | 11.850      | 12.938       |
| 30            | 72.283             | 0.056         | 1.138      | 0.204        | 0.453         | 1.603       | 8.743          | 1.579        | 2.009        | 3.648         | 8.589       | 9.332        |
| 33            | 44.399             | 0.041         | 1.221      | 0.234        | 0.367         | 1.877       | 5.171          | 0.849        | 1.442        | 2.931         | 5.115       | 5.895        |
| 36            | 24.109             | 0.032         | 0.939      | 0.129        | 0.235         | 1.495       | 3.431          | 0.432        | 0.994        | 2.548         | 3.105       | 4.017        |
| 39            | 15.114             | 0.023         | 0.620      | 0.134        | 0.189         | 1.158       | 1.556          | 0.230        | 0.699        | 1.557         | 1.522       | 2.177        |
| 42            | 10.473             | 0.008         | 0.551      | 0.069        | 0.123         | 0.837       | 1.127          | 0.130        | 0.463        | 1.176         | 1.069       | 1.589        |
| 45            | 6.323              | 0.010         | 0.369      | 0.031        | 0.066         | 0.507       | 0.710          | 0.095        | 0.372        | 0.753         | 0.695       | 1.025        |
| 48            | 3.481              | 0.005         | 0.105      | 0.034        | 0.055         | 0.158       | 0.358          | 0.054        | 0.380        | 0.484         | 0.285       | 0.562        |
| 52            | 2.545              | 0.003         | 0.086      | 0.013        | 0.080         | 0.092       | 0.178          | 0.028        | 0.550        | 0.571         | 0.177       | 0.598        |
| 56            | 1.599              | 0.012         | 0.072      | 0.026        | 0.081         | 0.181       | 0.113          | 0.042        | 0.652        | 0.690         | 0.094       | 0.696        |
| 60            | 1.184              | 0.008         | 0.035      | 0.010        | 0.190         | 0.043       | 0.076          | 0.023        | 1.335        | 1.350         | 0.061       | 1.352        |
| 64            | 0.702              | 0.015         | 0.070      | 0.021        | 0.224         | 0.137       | 0.121          | 0.030        | 1.438        | 1.464         | 0.124       | 1.469        |
| 68            | 0.466              | 0.018         | 0.080      | 0.027        | 0.283         | 0.209       | 0.141          | 0.036        | 1.670        | 1.703         | 0.202       | 1.715        |

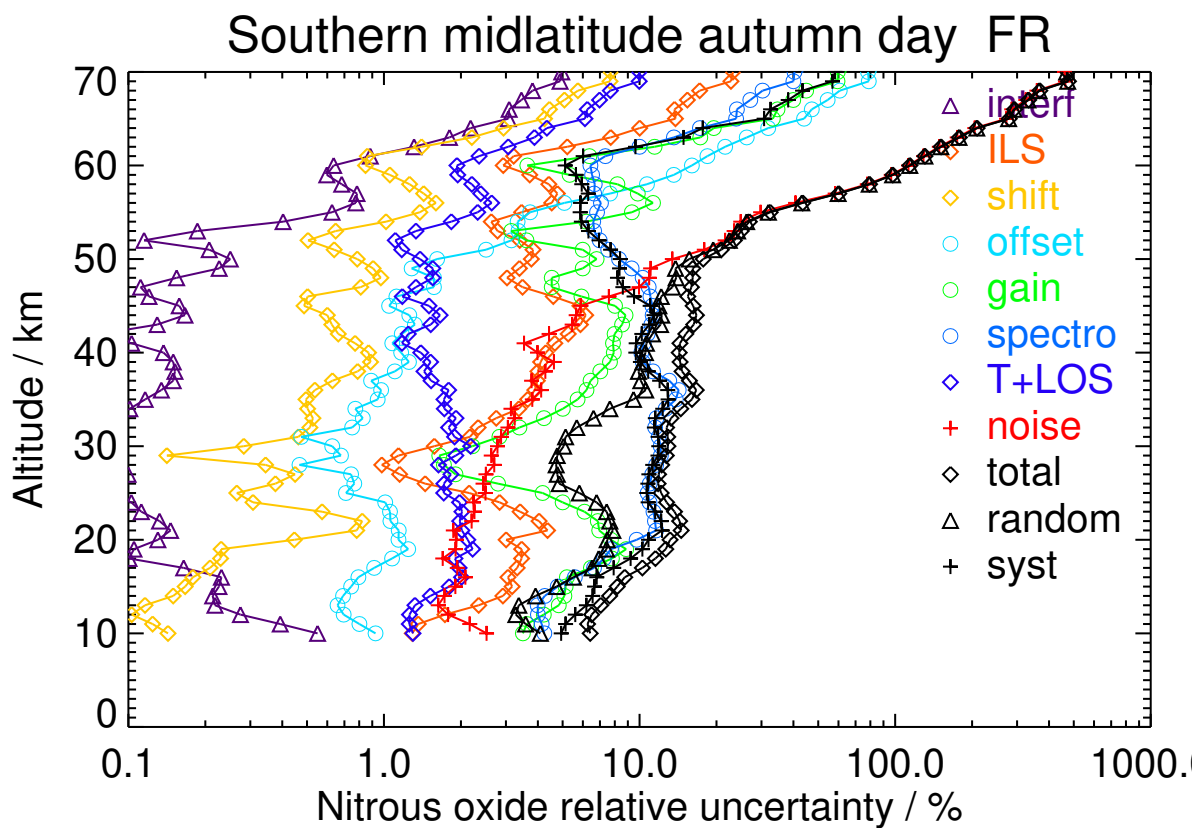

**Figure S161.** V8H\_N2O\_61 Southern midlatitude autumn day

**Table S162.** Nitrous oxide error budget for Southern midlatitude autumn night. All uncertainties are  $1\sigma$ .

| altitude (km) | mean target (ppbv) | interf (ppbv) | ILS (ppbv) | shift (ppbv) | offset (ppbv) | gain (ppbv) | spectro (ppbv) | T+LOS (ppbv) | noise (ppbv) | random (ppbv) | syst (ppbv) | total (ppbv) |
|---------------|--------------------|---------------|------------|--------------|---------------|-------------|----------------|--------------|--------------|---------------|-------------|--------------|
| 12            | 323.693            | 0.999         | 7.442      | 0.285        | 2.500         | 16.506      | 13.111         | 4.264        | 5.747        | 10.771        | 21.029      | 23.627       |
| 15            | 319.088            | 0.935         | 10.023     | 0.417        | 2.522         | 16.897      | 14.259         | 5.617        | 5.826        | 11.536        | 23.003      | 25.734       |
| 18            | 281.480            | 0.489         | 7.421      | 0.527        | 3.091         | 22.159      | 18.810         | 4.857        | 4.383        | 13.708        | 27.657      | 30.868       |
| 21            | 197.515            | 0.289         | 9.648      | 1.654        | 2.256         | 13.059      | 24.844         | 4.184        | 3.787        | 15.198        | 26.261      | 30.341       |
| 24            | 151.670            | 0.142         | 3.341      | 0.279        | 1.373         | 4.938       | 16.357         | 2.988        | 3.338        | 8.006         | 16.157      | 18.032       |
| 27            | 113.607            | 0.116         | 1.250      | 0.599        | 0.797         | 1.863       | 12.260         | 2.145        | 2.776        | 4.585         | 12.151      | 12.987       |
| 30            | 74.630             | 0.065         | 0.891      | 0.215        | 0.454         | 1.666       | 8.547          | 1.671        | 2.049        | 3.939         | 8.267       | 9.158        |
| 33            | 44.985             | 0.053         | 0.903      | 0.259        | 0.348         | 1.552       | 4.327          | 0.865        | 1.491        | 2.597         | 4.286       | 5.011        |
| 36            | 30.474             | 0.043         | 0.938      | 0.158        | 0.269         | 1.577       | 2.996          | 0.432        | 1.049        | 2.225         | 2.962       | 3.705        |
| 39            | 19.985             | 0.031         | 0.908      | 0.165        | 0.187         | 1.201       | 1.792          | 0.252        | 0.717        | 1.657         | 1.836       | 2.473        |
| 42            | 12.517             | 0.014         | 0.718      | 0.089        | 0.125         | 0.881       | 1.248          | 0.136        | 0.451        | 1.278         | 1.209       | 1.759        |
| 45            | 8.013              | 0.016         | 0.444      | 0.028        | 0.071         | 0.547       | 0.818          | 0.107        | 0.389        | 0.846         | 0.787       | 1.155        |
| 48            | 4.243              | 0.008         | 0.132      | 0.054        | 0.059         | 0.164       | 0.452          | 0.055        | 0.383        | 0.524         | 0.361       | 0.636        |
| 52            | 2.737              | 0.004         | 0.107      | 0.015        | 0.078         | 0.079       | 0.214          | 0.030        | 0.527        | 0.551         | 0.210       | 0.590        |
| 56            | 1.558              | 0.014         | 0.084      | 0.024        | 0.068         | 0.100       | 0.143          | 0.040        | 0.586        | 0.615         | 0.095       | 0.622        |
| 60            | 1.233              | 0.009         | 0.053      | 0.011        | 0.180         | 0.039       | 0.096          | 0.026        | 1.257        | 1.274         | 0.073       | 1.276        |
| 64            | 0.207              | 0.018         | 0.069      | 0.024        | 0.204         | 0.155       | 0.175          | 0.038        | 1.328        | 1.356         | 0.171       | 1.367        |
| 68            | -0.297             | 0.025         | 0.096      | 0.041        | 0.272         | 0.268       | 0.252          | 0.052        | 1.622        | 1.666         | 0.284       | 1.690        |

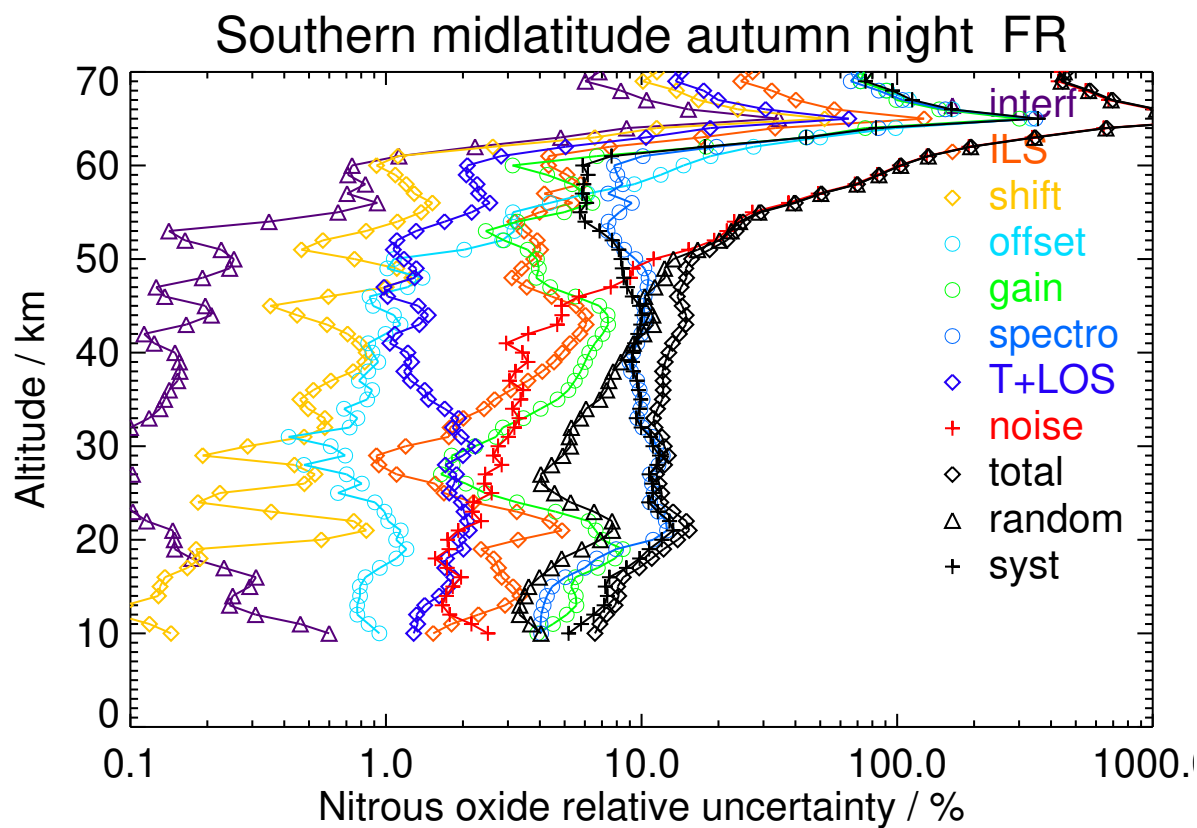

**Figure S162.** V8H\_N2O\_61 Southern midlatitude autumn night

**Table S163.** Nitrous oxide error budget for Southern polar winter day. All uncertainties are  $1\sigma$ .

| altitude<br>(km) | mean target<br>(ppbv) | interf<br>(ppbv) | ILS<br>(ppbv) | shift<br>(ppbv) | offset<br>(ppbv) | gain<br>(ppbv) | spectro<br>(ppbv) | T+LOS<br>(ppbv) | noise<br>(ppbv) | random<br>(ppbv) | syst<br>(ppbv) | total<br>(ppbv) |
|------------------|-----------------------|------------------|---------------|-----------------|------------------|----------------|-------------------|-----------------|-----------------|------------------|----------------|-----------------|
| 9                | 319.250               | 2.198            | 1.371         | 0.324           | 4.161            | 12.202         | 13.473            | 6.961           | 9.816           | 13.959           | 17.450         | 22.346          |
| 12               | 286.672               | 1.864            | 1.969         | 0.471           | 3.713            | 11.012         | 12.486            | 7.473           | 9.808           | 14.623           | 15.387         | 21.227          |
| 15               | 225.720               | 2.120            | 2.019         | 0.550           | 2.996            | 8.689          | 12.263            | 7.480           | 8.526           | 13.300           | 13.982         | 19.297          |
| 18               | 140.562               | 1.262            | 2.715         | 0.718           | 1.978            | 6.351          | 15.429            | 5.993           | 5.622           | 10.334           | 15.891         | 18.956          |
| 21               | 80.609                | 0.320            | 1.491         | 0.782           | 1.189            | 4.011          | 14.956            | 3.069           | 4.696           | 7.464            | 14.828         | 16.601          |
| 24               | 25.934                | 0.086            | 1.235         | 0.189           | 0.523            | 0.762          | 7.275             | 1.378           | 3.519           | 5.317            | 6.431          | 8.344           |
| 27               | 11.053                | 0.057            | 0.477         | 0.148           | 0.390            | 0.464          | 1.498             | 0.597           | 2.128           | 2.559            | 1.096          | 2.784           |
| 30               | 9.720                 | 0.056            | 0.344         | 0.106           | 0.264            | 0.409          | 1.260             | 0.355           | 1.455           | 1.720            | 1.114          | 2.049           |
| 33               | 4.260                 | 0.027            | 0.272         | 0.045           | 0.133            | 0.153          | 0.702             | 0.158           | 0.812           | 0.922            | 0.666          | 1.137           |
| 36               | 1.420                 | 0.007            | 0.099         | 0.017           | 0.066            | 0.044          | 0.239             | 0.051           | 0.414           | 0.464            | 0.178          | 0.497           |
| 39               | 0.836                 | 0.002            | 0.032         | 0.009           | 0.039            | 0.026          | 0.059             | 0.019           | 0.287           | 0.295            | 0.050          | 0.299           |
| 42               | 0.827                 | 0.003            | 0.018         | 0.006           | 0.027            | 0.017          | 0.053             | 0.013           | 0.229           | 0.236            | 0.037          | 0.239           |
| 45               | 1.221                 | 0.004            | 0.030         | 0.011           | 0.039            | 0.038          | 0.064             | 0.017           | 0.292           | 0.301            | 0.056          | 0.306           |
| 48               | 1.093                 | 0.003            | 0.023         | 0.005           | 0.058            | 0.017          | 0.060             | 0.009           | 0.397           | 0.403            | 0.053          | 0.407           |
| 52               | 1.145                 | 0.004            | 0.044         | 0.015           | 0.065            | 0.022          | 0.055             | 0.012           | 0.505           | 0.511            | 0.063          | 0.515           |
| 56               | 0.958                 | 0.005            | 0.025         | 0.015           | 0.074            | 0.035          | 0.063             | 0.017           | 0.556           | 0.564            | 0.054          | 0.567           |
| 60               | 0.943                 | 0.008            | 0.039         | 0.013           | 0.218            | 0.034          | 0.062             | 0.023           | 1.375           | 1.394            | 0.052          | 1.395           |
| 64               | 0.808                 | 0.010            | 0.045         | 0.017           | 0.254            | 0.026          | 0.067             | 0.026           | 1.569           | 1.591            | 0.050          | 1.592           |
| 68               | 0.323                 | 0.009            | 0.031         | 0.013           | 0.254            | 0.020          | 0.046             | 0.022           | 1.539           | 1.561            | 0.034          | 1.561           |

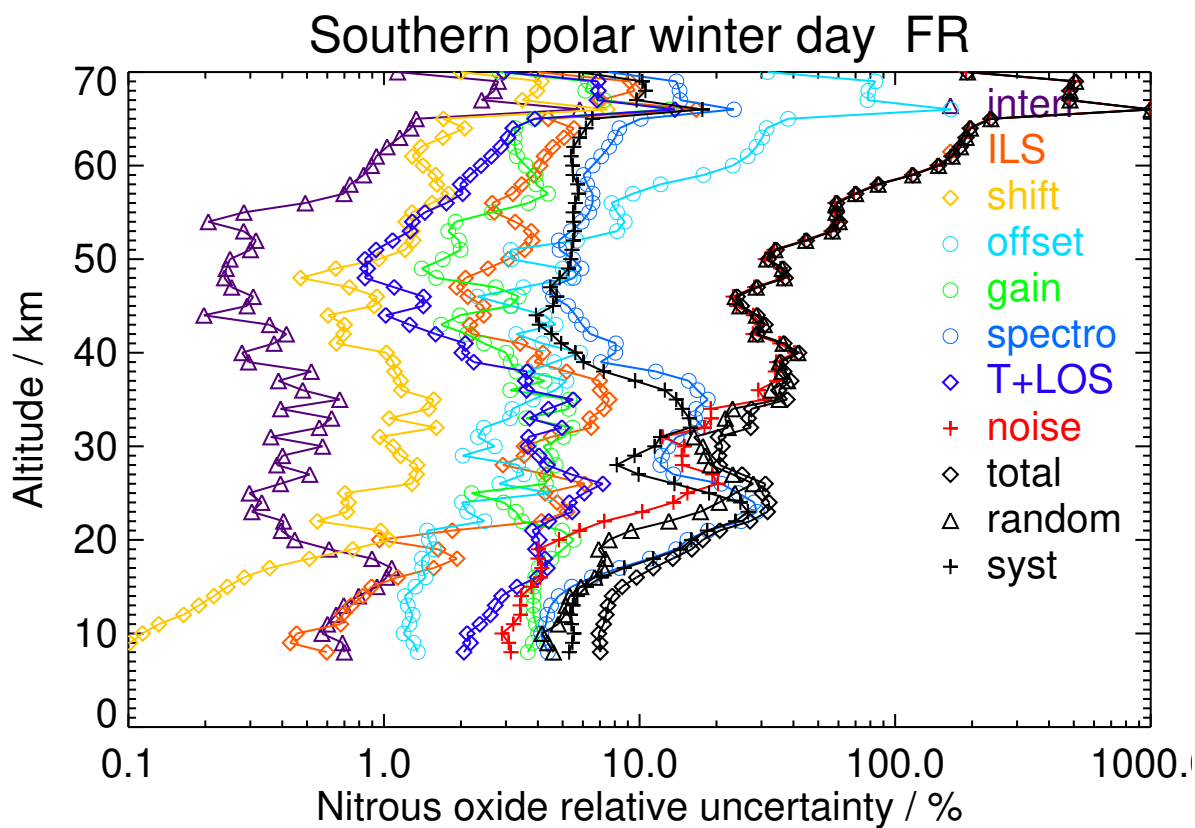

**Figure S163.** V8H\_N2O\_61 Southern polar winter day

**Table S164.** Nitrous oxide error budget for Southern polar winter night. All uncertainties are  $1\sigma$ .

| altitude<br>(km) | mean target<br>(ppbv) | interf<br>(ppbv) | ILS<br>(ppbv) | shift<br>(ppbv) | offset<br>(ppbv) | gain<br>(ppbv) | spectro<br>(ppbv) | T+LOS<br>(ppbv) | noise<br>(ppbv) | random<br>(ppbv) | syst<br>(ppbv) | total<br>(ppbv) |
|------------------|-----------------------|------------------|---------------|-----------------|------------------|----------------|-------------------|-----------------|-----------------|------------------|----------------|-----------------|
| 9                | 311.947               | 2.013            | 1.489         | 0.195           | 3.585            | 10.433         | 11.275            | 5.615           | 8.331           | 12.315           | 14.298         | 18.870          |
| 12               | 288.192               | 1.521            | 3.021         | 0.211           | 2.897            | 9.632          | 10.997            | 5.674           | 7.599           | 11.980           | 13.417         | 17.987          |
| 15               | 227.883               | 1.662            | 3.376         | 0.317           | 2.618            | 7.461          | 9.629             | 6.342           | 7.363           | 12.123           | 10.815         | 16.246          |
| 18               | 152.739               | 0.980            | 2.508         | 0.495           | 1.799            | 5.378          | 11.899            | 4.855           | 5.057           | 9.565            | 11.785         | 15.178          |
| 21               | 94.533                | 0.276            | 1.347         | 0.798           | 1.398            | 4.273          | 11.022            | 2.996           | 4.598           | 6.887            | 11.266         | 13.204          |
| 24               | 42.610                | 0.096            | 1.791         | 0.364           | 0.758            | 1.843          | 8.478             | 1.752           | 3.828           | 5.273            | 8.314          | 9.845           |
| 27               | 13.651                | 0.053            | 0.936         | 0.197           | 0.422            | 0.836          | 3.694             | 0.892           | 2.354           | 3.444            | 3.150          | 4.667           |
| 30               | 6.670                 | 0.044            | 0.358         | 0.120           | 0.249            | 0.569          | 1.163             | 0.386           | 1.396           | 1.917            | 0.553          | 1.995           |
| 33               | 5.804                 | 0.030            | 0.273         | 0.091           | 0.171            | 0.437          | 0.824             | 0.224           | 0.948           | 1.163            | 0.761          | 1.390           |
| 36               | 2.571                 | 0.009            | 0.158         | 0.039           | 0.084            | 0.221          | 0.385             | 0.096           | 0.537           | 0.642            | 0.342          | 0.727           |
| 39               | 1.149                 | 0.003            | 0.072         | 0.018           | 0.041            | 0.071          | 0.162             | 0.039           | 0.347           | 0.383            | 0.115          | 0.400           |
| 42               | 0.628                 | 0.003            | 0.033         | 0.015           | 0.035            | 0.072          | 0.093             | 0.035           | 0.274           | 0.291            | 0.088          | 0.304           |
| 45               | 0.860                 | 0.003            | 0.035         | 0.019           | 0.053            | 0.107          | 0.096             | 0.039           | 0.345           | 0.370            | 0.092          | 0.382           |
| 48               | 0.597                 | 0.002            | 0.025         | 0.007           | 0.063            | 0.025          | 0.054             | 0.013           | 0.443           | 0.451            | 0.041          | 0.453           |
| 52               | 0.923                 | 0.003            | 0.031         | 0.015           | 0.061            | 0.047          | 0.047             | 0.018           | 0.504           | 0.510            | 0.053          | 0.513           |
| 56               | 1.136                 | 0.003            | 0.022         | 0.013           | 0.077            | 0.057          | 0.059             | 0.020           | 0.572           | 0.580            | 0.065          | 0.584           |
| 60               | 1.346                 | 0.006            | 0.026         | 0.010           | 0.213            | 0.054          | 0.070             | 0.027           | 1.335           | 1.353            | 0.073          | 1.355           |
| 64               | 1.016                 | 0.008            | 0.031         | 0.008           | 0.257            | 0.031          | 0.080             | 0.030           | 1.567           | 1.589            | 0.069          | 1.591           |
| 68               | 0.886                 | 0.006            | 0.016         | 0.007           | 0.262            | 0.025          | 0.074             | 0.024           | 1.580           | 1.603            | 0.065          | 1.604           |

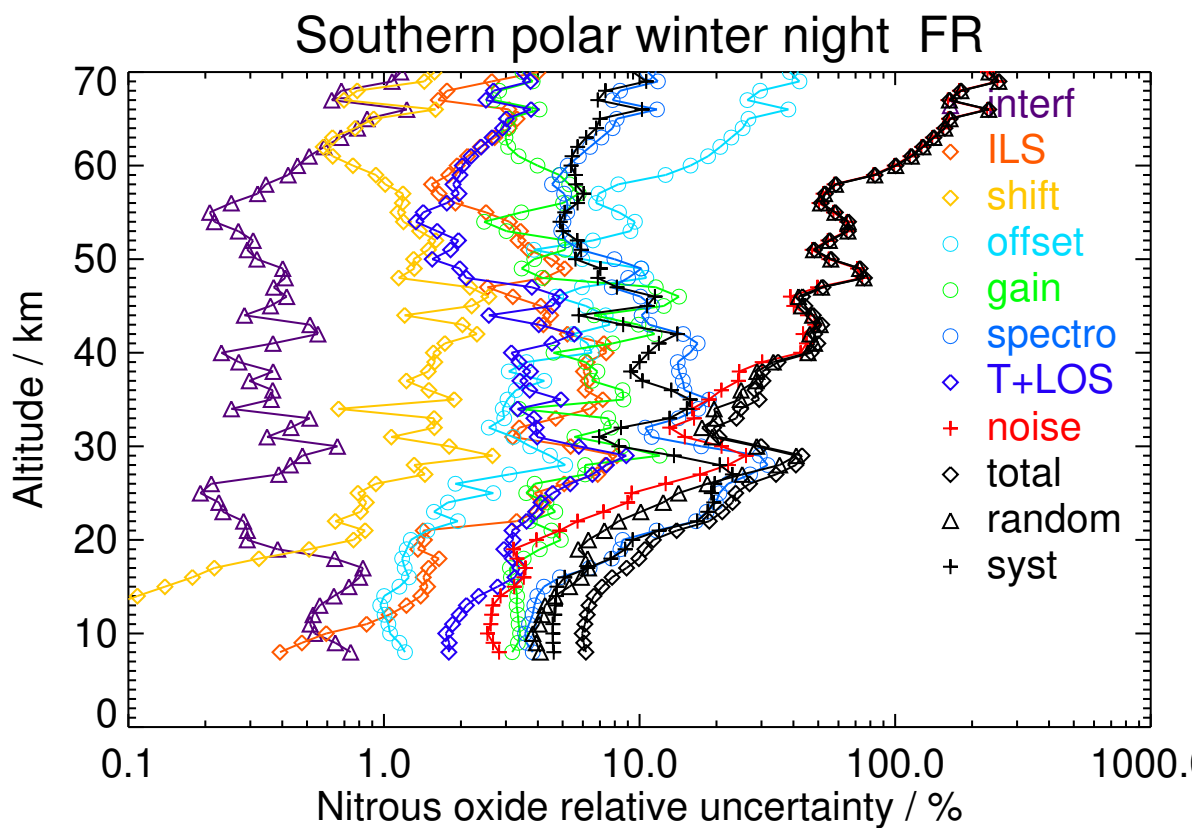

**Figure S164.** V8H\_N2O\_61 Southern polar winter night



**Table S165.** Nitrous oxide error budget for Southern polar spring day. All uncertainties are  $1\sigma$ .

| altitude<br>(km) | mean target<br>(ppbv) | interf<br>(ppbv) | ILS<br>(ppbv) | shift<br>(ppbv) | offset<br>(ppbv) | gain<br>(ppbv) | spectro<br>(ppbv) | T+LOS<br>(ppbv) | noise<br>(ppbv) | random<br>(ppbv) | syst<br>(ppbv) | total<br>(ppbv) |
|------------------|-----------------------|------------------|---------------|-----------------|------------------|----------------|-------------------|-----------------|-----------------|------------------|----------------|-----------------|
| 9                | 308.334               | 3.715            | 5.085         | 0.557           | 3.864            | 10.286         | 11.137            | 7.414           | 10.775          | 15.219           | 14.972         | 21.349          |
| 12               | 286.364               | 2.323            | 6.376         | 0.811           | 2.871            | 9.035          | 10.895            | 7.605           | 8.783           | 13.435           | 14.483         | 19.755          |
| 15               | 200.571               | 1.511            | 5.266         | 0.874           | 1.917            | 4.797          | 16.223            | 7.008           | 7.111           | 12.284           | 16.415         | 20.502          |
| 18               | 91.991                | 0.324            | 4.064         | 0.773           | 0.953            | 2.549          | 15.841            | 6.186           | 4.123           | 8.785            | 15.926         | 18.189          |
| 21               | 10.972                | 0.084            | 1.829         | 0.255           | 0.387            | 0.703          | 3.333             | 1.282           | 2.884           | 4.368            | 2.461          | 5.013           |
| 24               | 7.367                 | 0.111            | 2.086         | 0.167           | 0.302            | 1.111          | 2.917             | 0.635           | 2.424           | 3.482            | 2.894          | 4.528           |
| 27               | 14.935                | 0.131            | 1.669         | 0.189           | 0.351            | 0.528          | 1.994             | 0.450           | 2.176           | 3.306            | 1.106          | 3.486           |
| 30               | 20.628                | 0.086            | 1.379         | 0.130           | 0.256            | 1.997          | 3.438             | 0.347           | 1.679           | 4.148            | 1.881          | 4.554           |
| 33               | 15.281                | 0.034            | 0.505         | 0.092           | 0.135            | 0.538          | 1.253             | 0.201           | 0.929           | 1.382            | 1.065          | 1.745           |
| 36               | 11.299                | 0.020            | 0.413         | 0.072           | 0.072            | 0.446          | 0.675             | 0.116           | 0.518           | 0.748            | 0.748          | 1.057           |
| 39               | 9.571                 | 0.013            | 0.326         | 0.042           | 0.041            | 0.349          | 0.515             | 0.074           | 0.324           | 0.489            | 0.607          | 0.779           |
| 42               | 6.885                 | 0.008            | 0.300         | 0.034           | 0.037            | 0.292          | 0.424             | 0.065           | 0.273           | 0.485            | 0.448          | 0.661           |
| 45               | 4.979                 | 0.007            | 0.230         | 0.023           | 0.034            | 0.224          | 0.342             | 0.044           | 0.238           | 0.392            | 0.355          | 0.529           |
| 48               | 3.407                 | 0.010            | 0.181         | 0.020           | 0.032            | 0.170          | 0.230             | 0.029           | 0.230           | 0.344            | 0.227          | 0.412           |
| 52               | 2.211                 | 0.010            | 0.135         | 0.024           | 0.031            | 0.114          | 0.148             | 0.021           | 0.261           | 0.303            | 0.178          | 0.351           |
| 56               | 1.117                 | 0.007            | 0.063         | 0.014           | 0.053            | 0.055          | 0.108             | 0.022           | 0.364           | 0.381            | 0.097          | 0.393           |
| 60               | 0.324                 | 0.027            | 0.184         | 0.039           | 0.148            | 0.165          | 0.148             | 0.024           | 0.819           | 0.870            | 0.147          | 0.882           |
| 64               | -0.488                | 0.037            | 0.417         | 0.066           | 0.203            | 0.331          | 0.322             | 0.040           | 1.133           | 1.194            | 0.541          | 1.311           |
| 68               | -2.202                | 0.065            | 0.946         | 0.138           | 0.211            | 0.752          | 0.742             | 0.081           | 1.205           | 1.444            | 1.206          | 1.881           |

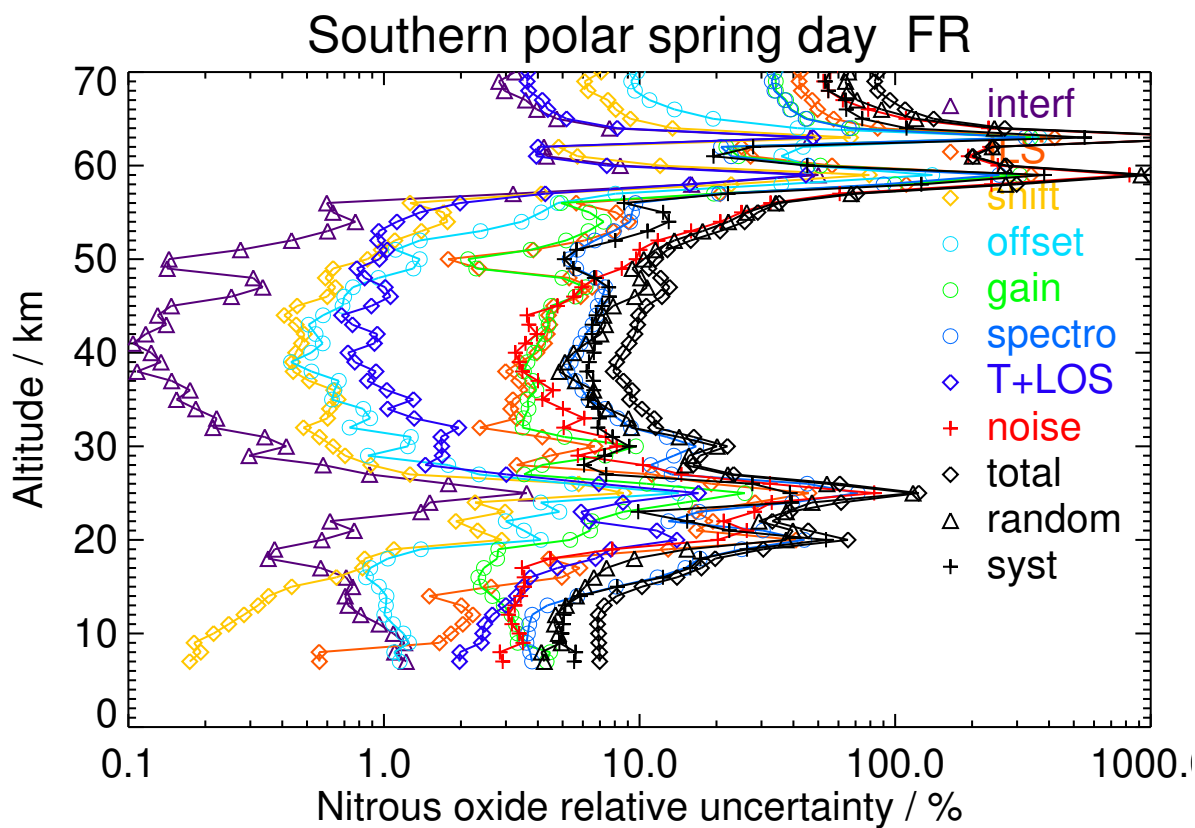

**Figure S165.** V8H\_N2O\_61 Southern polar spring day



**Table S166.** Nitrous oxide error budget for Southern polar spring night. All uncertainties are  $1\sigma$ .

| altitude<br>(km) | mean target<br>(ppbv) | interf<br>(ppbv) | ILS<br>(ppbv) | shift<br>(ppbv) | offset<br>(ppbv) | gain<br>(ppbv) | spectro<br>(ppbv) | T+LOS<br>(ppbv) | noise<br>(ppbv) | random<br>(ppbv) | syst<br>(ppbv) | total<br>(ppbv) |
|------------------|-----------------------|------------------|---------------|-----------------|------------------|----------------|-------------------|-----------------|-----------------|------------------|----------------|-----------------|
| 9                | 310.302               | 2.695            | 5.595         | 0.601           | 3.691            | 9.404          | 12.151            | 6.284           | 9.671           | 14.979           | 14.045         | 20.534          |
| 12               | 289.061               | 1.438            | 7.598         | 0.883           | 2.415            | 8.722          | 12.142            | 6.014           | 7.127           | 13.870           | 13.583         | 19.413          |
| 15               | 209.435               | 1.279            | 5.772         | 1.033           | 1.951            | 6.345          | 14.618            | 6.675           | 6.352           | 13.674           | 13.846         | 19.460          |
| 18               | 121.684               | 0.371            | 3.360         | 0.959           | 1.309            | 4.839          | 13.046            | 6.785           | 4.597           | 10.646           | 12.709         | 16.578          |
| 21               | 67.831                | 0.124            | 7.233         | 0.774           | 0.884            | 4.117          | 10.272            | 2.552           | 3.675           | 10.303           | 9.489          | 14.007          |
| 24               | 64.608                | 0.119            | 7.057         | 0.957           | 0.921            | 7.044          | 9.156             | 1.651           | 3.032           | 12.179           | 6.974          | 14.034          |
| 27               | 60.062                | 0.113            | 2.987         | 0.478           | 0.647            | 3.449          | 9.668             | 1.188           | 2.662           | 8.974            | 6.550          | 11.111          |
| 30               | 41.332                | 0.143            | 1.327         | 0.315           | 0.362            | 2.258          | 7.357             | 0.802           | 1.908           | 6.910            | 4.215          | 8.095           |
| 33               | 20.906                | 0.080            | 1.092         | 0.152           | 0.200            | 1.079          | 3.774             | 0.469           | 1.142           | 3.412            | 2.560          | 4.266           |
| 36               | 11.618                | 0.038            | 0.519         | 0.093           | 0.125            | 0.821          | 1.361             | 0.193           | 0.586           | 1.460            | 1.035          | 1.790           |
| 39               | 8.504                 | 0.015            | 0.386         | 0.040           | 0.072            | 0.523          | 0.757             | 0.092           | 0.358           | 0.783            | 0.726          | 1.068           |
| 42               | 6.650                 | 0.010            | 0.193         | 0.035           | 0.061            | 0.409          | 0.443             | 0.069           | 0.305           | 0.550            | 0.448          | 0.709           |
| 45               | 4.964                 | 0.009            | 0.096         | 0.020           | 0.040            | 0.165          | 0.325             | 0.046           | 0.271           | 0.362            | 0.297          | 0.468           |
| 48               | 3.559                 | 0.012            | 0.083         | 0.018           | 0.045            | 0.170          | 0.217             | 0.035           | 0.272           | 0.356            | 0.185          | 0.401           |
| 52               | 2.597                 | 0.009            | 0.115         | 0.023           | 0.041            | 0.124          | 0.176             | 0.025           | 0.318           | 0.356            | 0.192          | 0.405           |
| 56               | 1.350                 | 0.010            | 0.055         | 0.017           | 0.061            | 0.067          | 0.142             | 0.028           | 0.424           | 0.447            | 0.110          | 0.461           |
| 60               | 0.229                 | 0.023            | 0.096         | 0.026           | 0.179            | 0.223          | 0.142             | 0.029           | 0.972           | 1.017            | 0.152          | 1.028           |
| 64               | -0.537                | 0.032            | 0.259         | 0.056           | 0.232            | 0.332          | 0.250             | 0.044           | 1.286           | 1.351            | 0.358          | 1.398           |
| 68               | -1.245                | 0.054            | 0.637         | 0.123           | 0.213            | 0.463          | 0.501             | 0.057           | 1.256           | 1.437            | 0.673          | 1.586           |

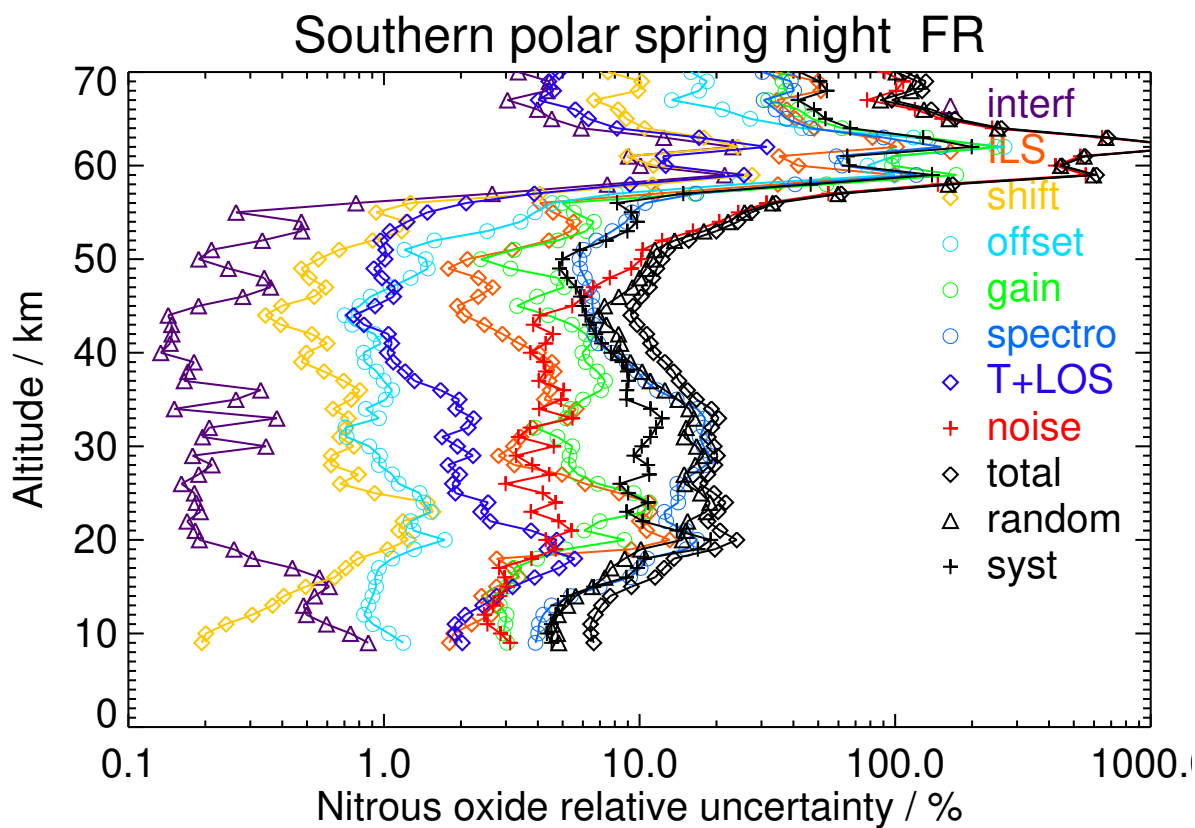

**Figure S166.** V8H\_N2O\_61 Southern polar spring night

**Table S167.** Nitrous oxide error budget for Southern polar summer day. All uncertainties are  $1\sigma$ .

| altitude<br>(km) | mean target<br>(ppbv) | interf<br>(ppbv) | ILS<br>(ppbv) | shift<br>(ppbv) | offset<br>(ppbv) | gain<br>(ppbv) | spectro<br>(ppbv) | T+LOS<br>(ppbv) | noise<br>(ppbv) | random<br>(ppbv) | syst<br>(ppbv) | total<br>(ppbv) |
|------------------|-----------------------|------------------|---------------|-----------------|------------------|----------------|-------------------|-----------------|-----------------|------------------|----------------|-----------------|
| 9                | 290.308               | 2.235            | 1.323         | 0.579           | 2.372            | 5.546          | 12.144            | 3.151           | 7.838           | 11.027           | 11.863         | 16.196          |
| 12               | 292.512               | 0.847            | 3.494         | 0.247           | 1.332            | 10.092         | 14.058            | 2.559           | 4.067           | 10.051           | 15.373         | 18.367          |
| 15               | 265.685               | 0.529            | 6.453         | 0.312           | 1.505            | 11.128         | 18.128            | 4.193           | 4.323           | 14.620           | 17.868         | 23.087          |
| 18               | 212.158               | 0.277            | 6.787         | 0.310           | 1.379            | 8.589          | 18.770            | 4.744           | 4.026           | 10.970           | 19.814         | 22.648          |
| 21               | 162.832               | 0.125            | 12.037        | 0.630           | 1.097            | 7.256          | 19.305            | 4.037           | 3.909           | 10.637           | 22.142         | 24.565          |
| 24               | 133.087               | 0.073            | 9.225         | 1.274           | 0.826            | 4.452          | 15.939            | 2.865           | 3.567           | 7.737            | 17.955         | 19.551          |
| 27               | 100.313               | 0.049            | 2.632         | 0.444           | 0.658            | 3.115          | 11.268            | 1.852           | 3.020           | 4.155            | 11.811         | 12.521          |
| 30               | 71.956                | 0.068            | 0.441         | 0.318           | 0.246            | 1.251          | 6.370             | 1.064           | 2.067           | 2.529            | 6.443          | 6.922           |
| 33               | 46.359                | 0.029            | 0.456         | 0.249           | 0.167            | 1.444          | 3.752             | 0.692           | 1.202           | 1.543            | 4.000          | 4.287           |
| 36               | 26.873                | 0.056            | 1.206         | 0.210           | 0.118            | 1.034          | 2.204             | 0.345           | 0.717           | 0.957            | 2.676          | 2.842           |
| 39               | 13.066                | 0.012            | 0.832         | 0.071           | 0.044            | 0.527          | 1.390             | 0.192           | 0.457           | 0.620            | 1.664          | 1.776           |
| 42               | 4.679                 | 0.009            | 0.194         | 0.021           | 0.038            | 0.135          | 0.440             | 0.117           | 0.343           | 0.412            | 0.462          | 0.619           |
| 45               | 2.183                 | 0.008            | 0.128         | 0.019           | 0.030            | 0.051          | 0.160             | 0.067           | 0.248           | 0.273            | 0.193          | 0.335           |
| 48               | 0.844                 | 0.004            | 0.052         | 0.008           | 0.027            | 0.031          | 0.079             | 0.015           | 0.183           | 0.194            | 0.083          | 0.211           |
| 52               | 0.283                 | 0.006            | 0.042         | 0.011           | 0.038            | 0.022          | 0.037             | 0.014           | 0.240           | 0.250            | 0.030          | 0.252           |
| 56               | 0.152                 | 0.005            | 0.052         | 0.013           | 0.031            | 0.018          | 0.034             | 0.012           | 0.237           | 0.243            | 0.050          | 0.248           |
| 60               | 0.372                 | 0.012            | 0.158         | 0.037           | 0.119            | 0.040          | 0.126             | 0.027           | 0.661           | 0.677            | 0.194          | 0.704           |
| 64               | -0.591                | 0.021            | 0.104         | 0.032           | 0.110            | 0.113          | 0.157             | 0.024           | 0.688           | 0.701            | 0.210          | 0.732           |
| 68               | -1.167                | 0.040            | 0.257         | 0.080           | 0.225            | 0.204          | 0.356             | 0.042           | 1.327           | 1.354            | 0.473          | 1.434           |

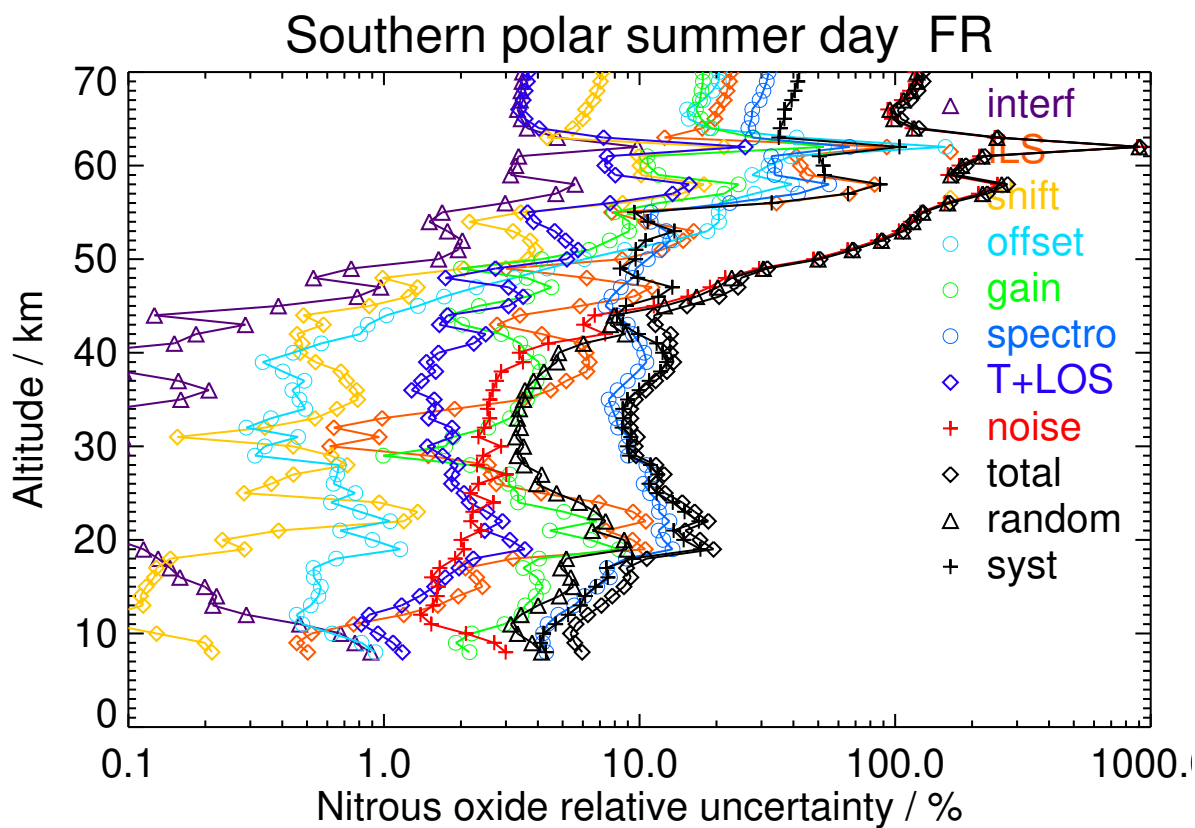

**Figure S167.** V8H\_N2O\_61 Southern polar summer day

**Table S168.** Nitrous oxide error budget for Southern polar summer night. All uncertainties are  $1\sigma$ .

| altitude<br>(km) | mean target<br>(ppbv) | interf<br>(ppbv) | ILS<br>(ppbv) | shift<br>(ppbv) | offset<br>(ppbv) | gain<br>(ppbv) | spectro<br>(ppbv) | T+LOS<br>(ppbv) | noise<br>(ppbv) | random<br>(ppbv) | syst<br>(ppbv) | total<br>(ppbv) |
|------------------|-----------------------|------------------|---------------|-----------------|------------------|----------------|-------------------|-----------------|-----------------|------------------|----------------|-----------------|
| 9                | 299.406               | 2.476            | 1.809         | 0.501           | 2.374            | 2.890          | 14.730            | 4.140           | 8.064           | 10.063           | 14.884         | 17.967          |
| 12               | 302.111               | 0.809            | 3.833         | 0.382           | 1.668            | 10.432         | 13.378            | 3.246           | 4.710           | 8.326            | 16.415         | 18.406          |
| 15               | 298.761               | 0.598            | 10.820        | 0.544           | 2.089            | 18.980         | 14.908            | 5.249           | 4.901           | 12.195           | 24.646         | 27.498          |
| 18               | 242.678               | 0.187            | 7.387         | 0.540           | 1.927            | 17.603         | 18.678            | 4.213           | 3.604           | 13.409           | 23.839         | 27.351          |
| 21               | 186.248               | 0.134            | 7.515         | 1.518           | 2.157            | 17.454         | 19.326            | 4.205           | 3.426           | 16.370           | 22.429         | 27.767          |
| 24               | 133.037               | 0.072            | 3.949         | 0.433           | 1.051            | 6.208          | 14.723            | 2.616           | 3.021           | 8.060            | 14.940         | 16.976          |
| 27               | 92.105                | 0.059            | 2.215         | 0.535           | 0.769            | 2.505          | 10.567            | 1.792           | 2.453           | 3.646            | 10.939         | 11.530          |
| 30               | 62.560                | 0.056            | 0.601         | 0.101           | 0.366            | 0.832          | 6.394             | 1.164           | 1.663           | 2.255            | 6.412          | 6.797           |
| 33               | 36.897                | 0.019            | 0.873         | 0.243           | 0.227            | 1.435          | 3.773             | 0.631           | 1.088           | 1.483            | 4.068          | 4.330           |
| 36               | 15.859                | 0.039            | 0.851         | 0.099           | 0.104            | 0.661          | 1.926             | 0.281           | 0.641           | 0.866            | 2.153          | 2.320           |
| 39               | 5.418                 | 0.009            | 0.308         | 0.020           | 0.044            | 0.161          | 0.665             | 0.114           | 0.317           | 0.383            | 0.729          | 0.824           |
| 42               | 1.443                 | 0.009            | 0.053         | 0.016           | 0.032            | 0.026          | 0.157             | 0.048           | 0.229           | 0.251            | 0.145          | 0.290           |
| 45               | 0.800                 | 0.010            | 0.123         | 0.019           | 0.032            | 0.045          | 0.076             | 0.046           | 0.257           | 0.270            | 0.140          | 0.304           |
| 48               | 0.223                 | 0.004            | 0.019         | 0.005           | 0.031            | 0.007          | 0.033             | 0.010           | 0.202           | 0.206            | 0.028          | 0.208           |
| 52               | 0.099                 | 0.003            | 0.029         | 0.007           | 0.045            | 0.011          | 0.029             | 0.009           | 0.300           | 0.306            | 0.013          | 0.306           |
| 56               | 0.325                 | 0.004            | 0.049         | 0.013           | 0.029            | 0.021          | 0.028             | 0.014           | 0.289           | 0.294            | 0.043          | 0.297           |
| 60               | 0.965                 | 0.005            | 0.089         | 0.024           | 0.131            | 0.027          | 0.095             | 0.020           | 0.846           | 0.859            | 0.117          | 0.867           |
| 64               | -0.064                | 0.020            | 0.120         | 0.029           | 0.146            | 0.076          | 0.140             | 0.031           | 0.941           | 0.955            | 0.187          | 0.973           |
| 68               | -0.752                | 0.030            | 0.204         | 0.054           | 0.237            | 0.124          | 0.241             | 0.047           | 1.398           | 1.423            | 0.326          | 1.460           |

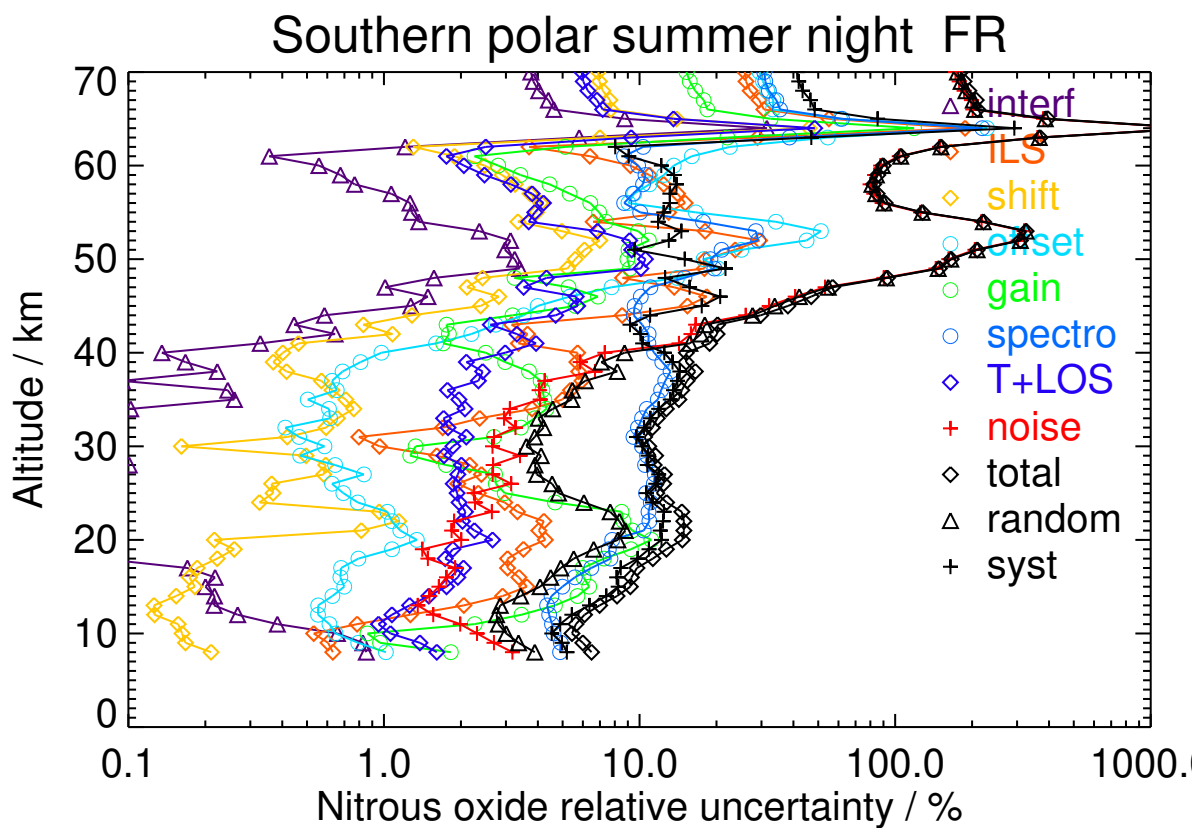

**Figure S168.** V8H\_N2O\_61 Southern polar summer night

**Table S169.** Nitrous oxide error budget for Southern polar autumn day. All uncertainties are  $1\sigma$ .

| altitude<br>(km) | mean target<br>(ppbv) | interf<br>(ppbv) | ILS<br>(ppbv) | shift<br>(ppbv) | offset<br>(ppbv) | gain<br>(ppbv) | spectro<br>(ppbv) | T+LOS<br>(ppbv) | noise<br>(ppbv) | random<br>(ppbv) | syst<br>(ppbv) | total<br>(ppbv) |
|------------------|-----------------------|------------------|---------------|-----------------|------------------|----------------|-------------------|-----------------|-----------------|------------------|----------------|-----------------|
| 9                | 291.221               | 1.730            | 0.624         | 0.481           | 2.679            | 4.933          | 12.802            | 3.025           | 8.096           | 9.390            | 13.621         | 16.544          |
| 12               | 300.992               | 1.553            | 3.605         | 0.335           | 1.732            | 11.275         | 12.430            | 3.590           | 4.659           | 7.342            | 16.759         | 18.296          |
| 15               | 269.927               | 1.658            | 6.638         | 0.602           | 1.811            | 11.272         | 13.969            | 5.775           | 5.805           | 9.626            | 18.629         | 20.969          |
| 18               | 215.349               | 0.478            | 5.253         | 0.752           | 1.814            | 15.584         | 16.405            | 4.640           | 4.374           | 8.579            | 22.599         | 24.172          |
| 21               | 153.012               | 0.452            | 2.419         | 1.549           | 1.954            | 12.944         | 17.122            | 3.238           | 3.572           | 6.874            | 21.189         | 22.276          |
| 24               | 103.378               | 0.190            | 2.020         | 0.625           | 1.243            | 6.315          | 12.119            | 2.143           | 3.175           | 5.410            | 13.349         | 14.404          |
| 27               | 58.292                | 0.106            | 1.159         | 0.185           | 0.665            | 1.886          | 8.634             | 1.530           | 2.495           | 3.773            | 8.617          | 9.407           |
| 30               | 25.935                | 0.037            | 0.792         | 0.166           | 0.322            | 1.073          | 4.469             | 0.937           | 1.542           | 2.495            | 4.350          | 5.014           |
| 33               | 8.101                 | 0.030            | 0.389         | 0.117           | 0.178            | 0.834          | 1.611             | 0.373           | 0.862           | 1.392            | 1.560          | 2.091           |
| 36               | 1.853                 | 0.015            | 0.091         | 0.040           | 0.083            | 0.270          | 0.395             | 0.110           | 0.489           | 0.659            | 0.253          | 0.706           |
| 39               | 0.417                 | 0.005            | 0.045         | 0.015           | 0.051            | 0.099          | 0.151             | 0.036           | 0.350           | 0.386            | 0.111          | 0.402           |
| 42               | 0.011                 | 0.004            | 0.022         | 0.020           | 0.051            | 0.128          | 0.048             | 0.031           | 0.299           | 0.326            | 0.081          | 0.336           |
| 45               | 0.661                 | 0.005            | 0.029         | 0.040           | 0.058            | 0.284          | 0.061             | 0.075           | 0.308           | 0.342            | 0.271          | 0.437           |
| 48               | 0.276                 | 0.003            | 0.018         | 0.013           | 0.053            | 0.081          | 0.052             | 0.023           | 0.390           | 0.398            | 0.083          | 0.407           |
| 52               | 0.496                 | 0.003            | 0.021         | 0.017           | 0.082            | 0.102          | 0.049             | 0.029           | 0.567           | 0.578            | 0.093          | 0.585           |
| 56               | 1.111                 | 0.006            | 0.043         | 0.053           | 0.087            | 0.346          | 0.066             | 0.088           | 0.548           | 0.582            | 0.324          | 0.666           |
| 60               | 0.577                 | 0.002            | 0.036         | 0.021           | 0.176            | 0.097          | 0.061             | 0.031           | 1.235           | 1.250            | 0.097          | 1.253           |
| 64               | 0.358                 | 0.006            | 0.023         | 0.013           | 0.201            | 0.092          | 0.050             | 0.024           | 1.305           | 1.324            | 0.051          | 1.325           |
| 68               | 0.317                 | 0.008            | 0.020         | 0.018           | 0.264            | 0.146          | 0.049             | 0.031           | 1.546           | 1.572            | 0.116          | 1.576           |

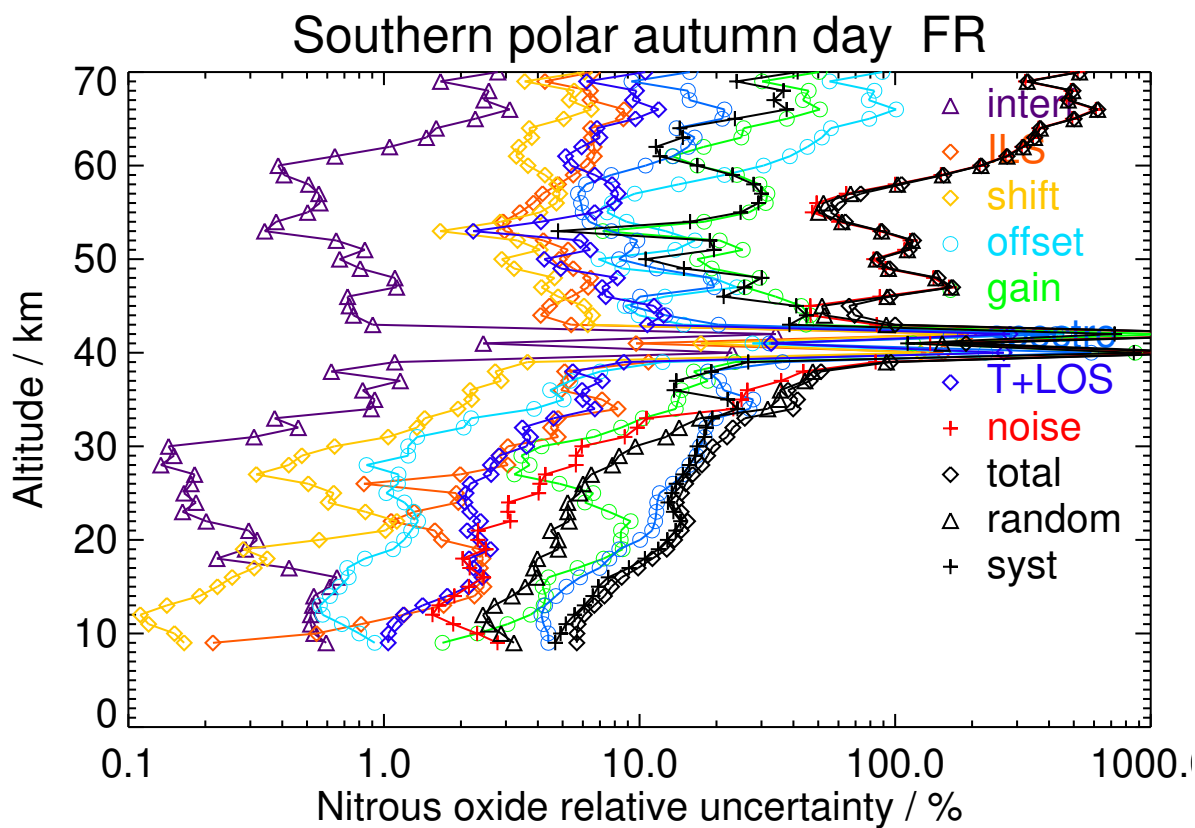

**Figure S169.** V8H\_N2O\_61 Southern polar autumn day

**Table S170.** Nitrous oxide error budget for Southern polar autumn night. All uncertainties are  $1\sigma$ .

| altitude<br>(km) | mean target<br>(ppbv) | interf<br>(ppbv) | ILS<br>(ppbv) | shift<br>(ppbv) | offset<br>(ppbv) | gain<br>(ppbv) | spectro<br>(ppbv) | T+LOS<br>(ppbv) | noise<br>(ppbv) | random<br>(ppbv) | syst<br>(ppbv) | total<br>(ppbv) |
|------------------|-----------------------|------------------|---------------|-----------------|------------------|----------------|-------------------|-----------------|-----------------|------------------|----------------|-----------------|
| 9                | 315.645               | 2.076            | 0.602         | 0.283           | 2.783            | 5.662          | 13.289            | 3.897           | 8.028           | 10.382           | 13.893         | 17.343          |
| 12               | 301.943               | 1.508            | 3.566         | 0.423           | 1.809            | 10.056         | 12.898            | 3.535           | 4.859           | 7.838            | 16.143         | 17.945          |
| 15               | 277.993               | 1.497            | 7.965         | 0.866           | 1.945            | 12.248         | 12.895            | 5.865           | 6.071           | 10.308           | 18.749         | 21.396          |
| 18               | 217.175               | 0.585            | 8.126         | 0.823           | 1.980            | 15.056         | 12.944            | 4.774           | 4.667           | 9.448            | 20.506         | 22.578          |
| 21               | 152.189               | 0.416            | 2.552         | 1.203           | 2.060            | 12.680         | 14.444            | 3.398           | 3.843           | 7.901            | 18.592         | 20.202          |
| 24               | 96.614                | 0.145            | 2.182         | 0.875           | 1.305            | 5.558          | 11.661            | 2.214           | 3.414           | 5.862            | 12.503         | 13.809          |
| 27               | 50.238                | 0.086            | 1.030         | 0.245           | 0.720            | 1.679          | 7.815             | 1.417           | 2.536           | 3.704            | 7.762          | 8.601           |
| 30               | 20.175                | 0.047            | 0.604         | 0.144           | 0.376            | 1.116          | 3.702             | 0.787           | 1.621           | 2.585            | 3.471          | 4.328           |
| 33               | 5.335                 | 0.030            | 0.256         | 0.094           | 0.179            | 0.670          | 1.116             | 0.278           | 0.827           | 1.291            | 0.947          | 1.601           |
| 36               | 0.773                 | 0.009            | 0.062         | 0.023           | 0.088            | 0.172          | 0.248             | 0.067           | 0.484           | 0.568            | 0.137          | 0.584           |
| 39               | 0.336                 | 0.003            | 0.027         | 0.013           | 0.061            | 0.087          | 0.088             | 0.027           | 0.396           | 0.417            | 0.062          | 0.421           |
| 42               | 0.116                 | 0.003            | 0.019         | 0.018           | 0.046            | 0.125          | 0.055             | 0.036           | 0.314           | 0.329            | 0.112          | 0.348           |
| 45               | 0.612                 | 0.003            | 0.024         | 0.024           | 0.045            | 0.187          | 0.081             | 0.054           | 0.346           | 0.366            | 0.183          | 0.409           |
| 48               | 0.368                 | 0.002            | 0.018         | 0.008           | 0.070            | 0.045          | 0.049             | 0.014           | 0.485           | 0.493            | 0.051          | 0.495           |
| 52               | 0.693                 | 0.002            | 0.022         | 0.012           | 0.073            | 0.063          | 0.045             | 0.020           | 0.579           | 0.588            | 0.037          | 0.589           |
| 56               | 0.978                 | 0.003            | 0.029         | 0.030           | 0.077            | 0.198          | 0.069             | 0.057           | 0.573           | 0.590            | 0.190          | 0.620           |
| 60               | 0.497                 | 0.002            | 0.028         | 0.017           | 0.193            | 0.090          | 0.048             | 0.032           | 1.297           | 1.313            | 0.087          | 1.316           |
| 64               | 0.243                 | 0.006            | 0.027         | 0.015           | 0.220            | 0.120          | 0.075             | 0.034           | 1.417           | 1.438            | 0.089          | 1.441           |
| 68               | 0.312                 | 0.007            | 0.028         | 0.020           | 0.259            | 0.163          | 0.076             | 0.040           | 1.550           | 1.577            | 0.134          | 1.583           |

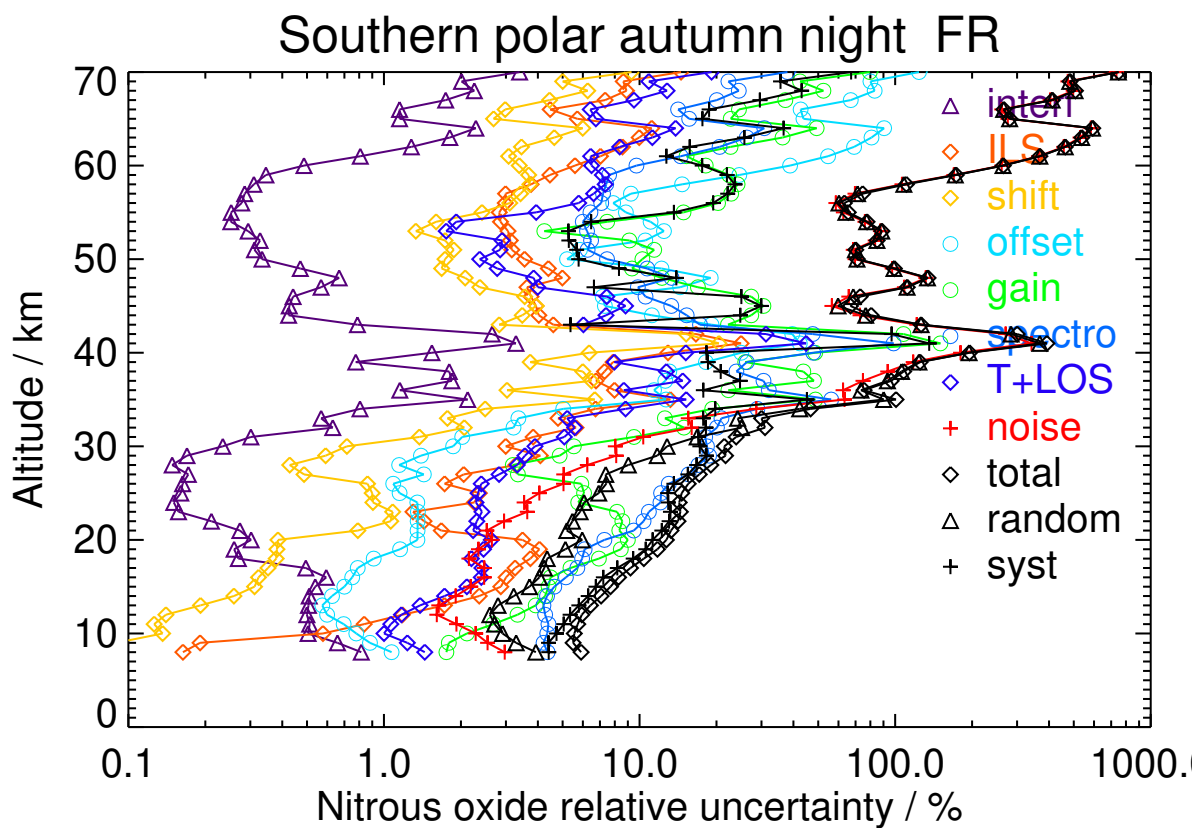

**Figure S170.** V8H\_N2O\_61 Southern polar autumn night

**Table S171.** Nitrous oxide error budget for Northern polar winter day. All uncertainties are  $1\sigma$ .

| altitude<br>(km) | mean target<br>(ppbv) | interf<br>(ppbv) | ILS<br>(ppbv) | shift<br>(ppbv) | offset<br>(ppbv) | gain<br>(ppbv) | spectro<br>(ppbv) | T+LOS<br>(ppbv) | noise<br>(ppbv) | random<br>(ppbv) | syst<br>(ppbv) | total<br>(ppbv) |
|------------------|-----------------------|------------------|---------------|-----------------|------------------|----------------|-------------------|-----------------|-----------------|------------------|----------------|-----------------|
| 12               | 277.970               | 4.890            | 5.064         | 0.291           | 2.126            | 8.187          | 15.971            | 5.355           | 9.911           | 14.849           | 16.813         | 22.431          |
| 15               | 249.137               | 4.292            | 4.621         | 0.302           | 1.096            | 6.098          | 17.419            | 3.810           | 4.613           | 9.964            | 17.837         | 20.432          |
| 18               | 196.645               | 0.809            | 5.797         | 0.456           | 0.772            | 10.233         | 18.928            | 3.557           | 3.041           | 12.322           | 19.187         | 22.803          |
| 21               | 186.107               | 0.479            | 6.573         | 0.276           | 0.694            | 8.175          | 20.017            | 2.589           | 3.062           | 11.267           | 20.016         | 22.969          |
| 24               | 156.460               | 0.371            | 4.588         | 0.257           | 0.576            | 5.763          | 16.152            | 2.077           | 2.879           | 7.707            | 16.398         | 18.119          |
| 27               | 125.933               | 0.191            | 3.103         | 0.268           | 0.575            | 4.024          | 13.341            | 1.906           | 2.894           | 7.093            | 12.881         | 14.705          |
| 30               | 88.711                | 0.140            | 1.107         | 0.226           | 0.349            | 2.096          | 10.277            | 1.417           | 1.995           | 5.625            | 9.261          | 10.835          |
| 33               | 51.224                | 0.105            | 0.654         | 0.231           | 0.181            | 1.131          | 6.987             | 0.963           | 1.597           | 3.684            | 6.366          | 7.355           |
| 36               | 19.387                | 0.063            | 0.615         | 0.107           | 0.117            | 0.755          | 2.919             | 0.369           | 1.121           | 2.177            | 2.480          | 3.300           |
| 39               | 10.444                | 0.036            | 0.302         | 0.046           | 0.084            | 0.321          | 1.145             | 0.158           | 0.877           | 1.249            | 0.866          | 1.520           |
| 42               | 6.363                 | 0.020            | 0.171         | 0.022           | 0.059            | 0.137          | 0.556             | 0.087           | 0.789           | 0.842            | 0.532          | 0.996           |
| 45               | 3.676                 | 0.014            | 0.102         | 0.020           | 0.049            | 0.089          | 0.355             | 0.051           | 0.775           | 0.796            | 0.342          | 0.867           |
| 48               | 1.537                 | 0.015            | 0.110         | 0.023           | 0.084            | 0.139          | 0.228             | 0.040           | 0.884           | 0.899            | 0.256          | 0.935           |
| 52               | 0.261                 | 0.017            | 0.056         | 0.020           | 0.100            | 0.088          | 0.091             | 0.020           | 1.047           | 1.056            | 0.107          | 1.061           |
| 56               | 0.400                 | 0.018            | 0.058         | 0.013           | 0.177            | 0.086          | 0.050             | 0.019           | 1.405           | 1.420            | 0.067          | 1.421           |
| 60               | -0.125                | 0.021            | 0.090         | 0.037           | 0.321            | 0.299          | 0.108             | 0.041           | 1.828           | 1.867            | 0.268          | 1.886           |
| 64               | -0.518                | 0.027            | 0.108         | 0.052           | 0.410            | 0.445          | 0.172             | 0.050           | 1.990           | 2.054            | 0.393          | 2.091           |
| 68               | -2.039                | 0.022            | 0.082         | 0.021           | 0.407            | 0.231          | 0.126             | 0.033           | 1.880           | 1.927            | 0.256          | 1.944           |

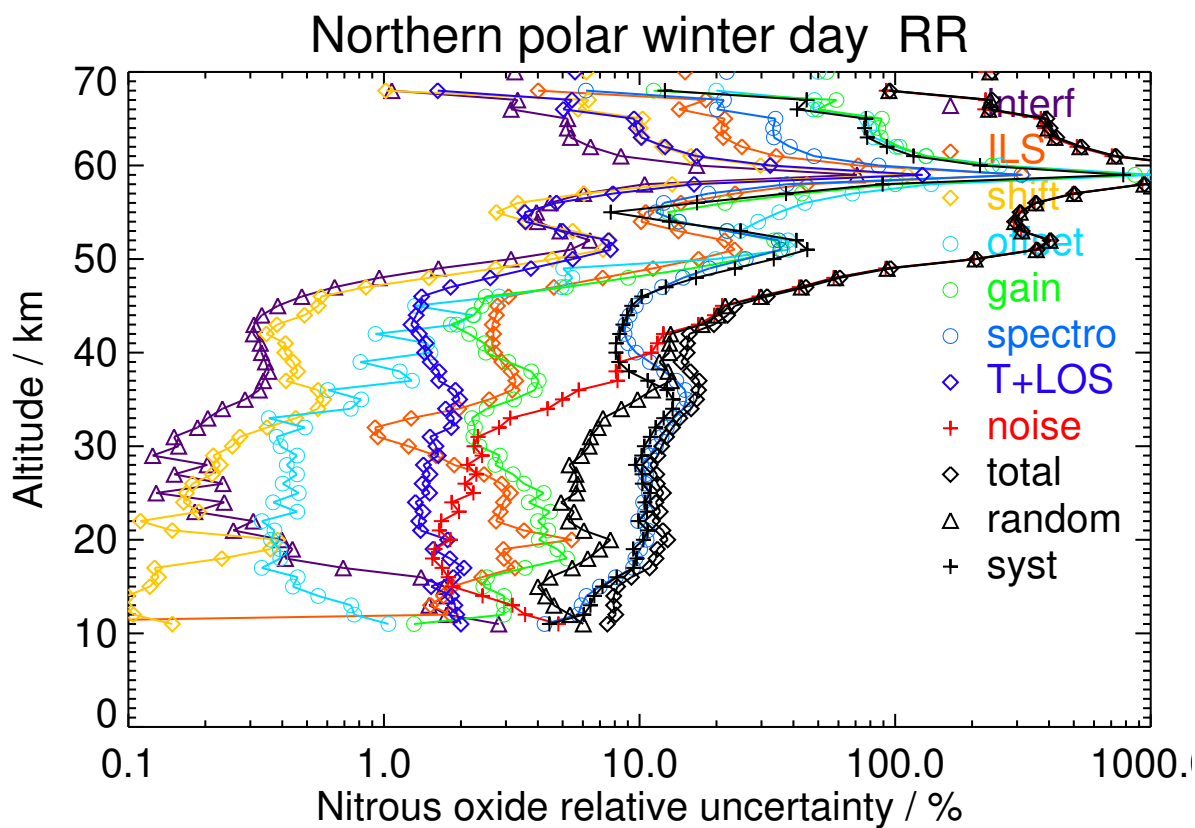

**Figure S171.** V8R\_N2O\_261 Northern polar winter day

**Table S172.** Nitrous oxide error budget for Northern polar winter night. All uncertainties are  $1\sigma$ .

| altitude<br>(km) | mean target<br>(ppbv) | interf<br>(ppbv) | ILS<br>(ppbv) | shift<br>(ppbv) | offset<br>(ppbv) | gain<br>(ppbv) | spectro<br>(ppbv) | T+LOS<br>(ppbv) | noise<br>(ppbv) | random<br>(ppbv) | syst<br>(ppbv) | total<br>(ppbv) |
|------------------|-----------------------|------------------|---------------|-----------------|------------------|----------------|-------------------|-----------------|-----------------|------------------|----------------|-----------------|
| 9                | 356.970               | 4.995            | 7.817         | 0.295           | 2.862            | 13.260         | 11.835            | 6.115           | 12.350          | 15.162           | 19.242         | 24.498          |
| 12               | 298.965               | 4.813            | 5.987         | 0.285           | 2.226            | 7.890          | 13.945            | 5.597           | 9.943           | 14.259           | 15.736         | 21.235          |
| 15               | 252.076               | 4.447            | 5.845         | 0.372           | 1.350            | 4.417          | 16.376            | 4.859           | 5.495           | 11.015           | 16.616         | 19.935          |
| 18               | 189.424               | 0.930            | 4.301         | 0.607           | 0.791            | 4.476          | 21.174            | 4.155           | 3.717           | 8.036            | 21.336         | 22.799          |
| 21               | 132.093               | 0.413            | 7.932         | 0.327           | 0.865            | 6.429          | 16.887            | 2.768           | 3.409           | 13.125           | 15.411         | 20.242          |
| 24               | 108.787               | 0.639            | 4.036         | 0.369           | 0.428            | 3.151          | 11.403            | 1.488           | 2.237           | 7.903            | 10.087         | 12.814          |
| 27               | 97.916                | 0.220            | 1.969         | 0.269           | 0.621            | 2.582          | 10.812            | 1.657           | 2.764           | 7.914            | 8.701          | 11.762          |
| 30               | 80.114                | 0.290            | 1.437         | 0.574           | 0.406            | 3.347          | 7.865             | 1.030           | 1.524           | 5.858            | 6.691          | 8.893           |
| 33               | 39.225                | 0.135            | 1.372         | 0.434           | 0.233            | 2.218          | 5.749             | 0.735           | 1.194           | 3.495            | 5.465          | 6.487           |
| 36               | 12.152                | 0.068            | 0.628         | 0.121           | 0.094            | 0.690          | 1.976             | 0.219           | 0.686           | 1.847            | 1.382          | 2.307           |
| 39               | 8.461                 | 0.037            | 0.322         | 0.057           | 0.069            | 0.358          | 0.738             | 0.090           | 0.527           | 0.856            | 0.582          | 1.035           |
| 42               | 7.164                 | 0.025            | 0.297         | 0.054           | 0.054            | 0.230          | 0.399             | 0.059           | 0.491           | 0.589            | 0.452          | 0.743           |
| 45               | 6.541                 | 0.024            | 0.165         | 0.058           | 0.047            | 0.158          | 0.373             | 0.050           | 0.529           | 0.591            | 0.361          | 0.692           |
| 48               | 3.992                 | 0.026            | 0.071         | 0.057           | 0.061            | 0.183          | 0.350             | 0.050           | 0.645           | 0.709            | 0.292          | 0.766           |
| 52               | 1.051                 | 0.017            | 0.050         | 0.018           | 0.059            | 0.091          | 0.177             | 0.029           | 0.781           | 0.798            | 0.138          | 0.810           |
| 56               | 0.015                 | 0.021            | 0.081         | 0.022           | 0.123            | 0.086          | 0.075             | 0.017           | 1.114           | 1.127            | 0.079          | 1.130           |
| 60               | -0.281                | 0.067            | 0.383         | 0.133           | 0.254            | 0.588          | 0.351             | 0.064           | 1.591           | 1.706            | 0.573          | 1.800           |
| 64               | -0.727                | 0.114            | 0.665         | 0.238           | 0.355            | 0.952          | 0.611             | 0.104           | 1.832           | 2.077            | 0.984          | 2.299           |
| 68               | 0.698                 | 0.159            | 1.057         | 0.323           | 0.341            | 0.365          | 0.829             | 0.074           | 1.699           | 1.881            | 1.240          | 2.253           |

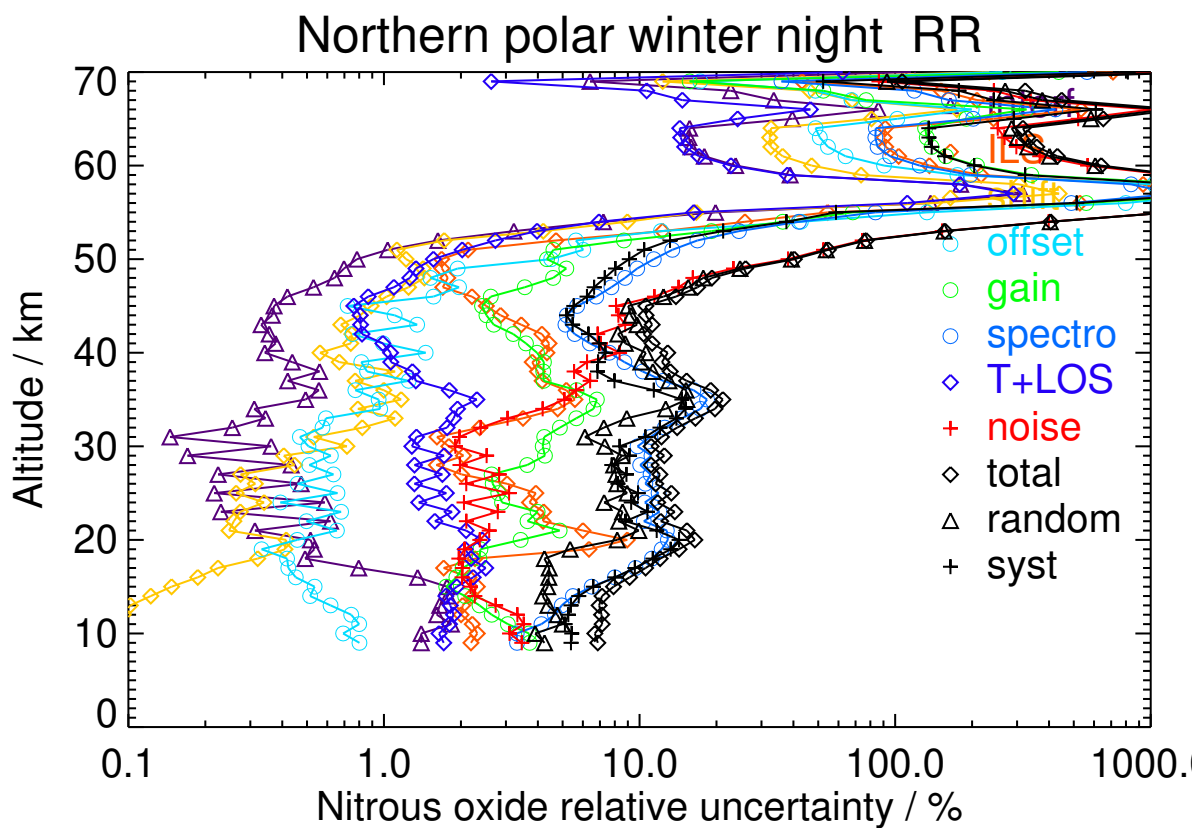

**Figure S172.** V8R\_N2O\_261 Northern polar winter night



**Table S173.** Nitrous oxide error budget for Northern polar spring day. All uncertainties are  $1\sigma$ .

| altitude<br>(km) | mean target<br>(ppbv) | interf<br>(ppbv) | ILS<br>(ppbv) | shift<br>(ppbv) | offset<br>(ppbv) | gain<br>(ppbv) | spectro<br>(ppbv) | T+LOS<br>(ppbv) | noise<br>(ppbv) | random<br>(ppbv) | syst<br>(ppbv) | total<br>(ppbv) |
|------------------|-----------------------|------------------|---------------|-----------------|------------------|----------------|-------------------|-----------------|-----------------|------------------|----------------|-----------------|
| 12               | 291.274               | 1.328            | 2.859         | 0.248           | 1.975            | 8.878          | 15.264            | 5.124           | 8.732           | 11.017           | 17.517         | 20.693          |
| 15               | 252.441               | 0.712            | 4.192         | 0.194           | 1.245            | 7.849          | 15.220            | 4.819           | 4.918           | 7.837            | 17.289         | 18.982          |
| 18               | 209.418               | 0.126            | 3.275         | 0.391           | 0.765            | 10.762         | 19.673            | 3.873           | 3.569           | 7.430            | 22.065         | 23.282          |
| 21               | 155.635               | 0.167            | 3.181         | 0.275           | 0.694            | 7.339          | 15.838            | 2.597           | 3.631           | 5.508            | 17.464         | 18.312          |
| 24               | 141.661               | 0.095            | 2.819         | 0.319           | 0.639            | 5.651          | 13.619            | 2.300           | 3.646           | 5.182            | 14.751         | 15.635          |
| 27               | 97.741                | 0.084            | 1.562         | 0.301           | 0.531            | 1.912          | 12.614            | 1.993           | 3.314           | 4.327            | 12.720         | 13.436          |
| 30               | 57.524                | 0.045            | 0.317         | 0.257           | 0.297            | 0.815          | 7.750             | 1.330           | 2.393           | 3.148            | 7.653          | 8.275           |
| 33               | 26.251                | 0.064            | 0.510         | 0.195           | 0.203            | 0.868          | 3.837             | 0.637           | 1.660           | 1.942            | 3.900          | 4.356           |
| 36               | 9.991                 | 0.038            | 0.389         | 0.063           | 0.124            | 0.524          | 1.334             | 0.209           | 0.902           | 1.010            | 1.437          | 1.756           |
| 39               | 3.957                 | 0.009            | 0.180         | 0.018           | 0.056            | 0.104          | 0.468             | 0.068           | 0.493           | 0.517            | 0.495          | 0.716           |
| 42               | 1.069                 | 0.009            | 0.065         | 0.009           | 0.040            | 0.030          | 0.189             | 0.029           | 0.377           | 0.389            | 0.187          | 0.431           |
| 45               | 0.122                 | 0.010            | 0.014         | 0.004           | 0.036            | 0.030          | 0.047             | 0.011           | 0.363           | 0.368            | 0.027          | 0.369           |
| 48               | 0.772                 | 0.012            | 0.020         | 0.006           | 0.041            | 0.041          | 0.047             | 0.010           | 0.418           | 0.423            | 0.049          | 0.426           |
| 52               | 0.315                 | 0.013            | 0.018         | 0.004           | 0.040            | 0.013          | 0.051             | 0.007           | 0.533           | 0.536            | 0.037          | 0.537           |
| 56               | 0.014                 | 0.015            | 0.014         | 0.007           | 0.064            | 0.032          | 0.032             | 0.009           | 0.771           | 0.774            | 0.035          | 0.775           |
| 60               | 0.110                 | 0.011            | 0.015         | 0.006           | 0.131            | 0.020          | 0.035             | 0.008           | 1.046           | 1.055            | 0.022          | 1.055           |
| 64               | 0.020                 | 0.022            | 0.044         | 0.007           | 0.275            | 0.069          | 0.040             | 0.014           | 1.480           | 1.507            | 0.069          | 1.508           |
| 68               | -0.201                | 0.022            | 0.048         | 0.008           | 0.316            | 0.103          | 0.043             | 0.019           | 1.595           | 1.627            | 0.102          | 1.630           |

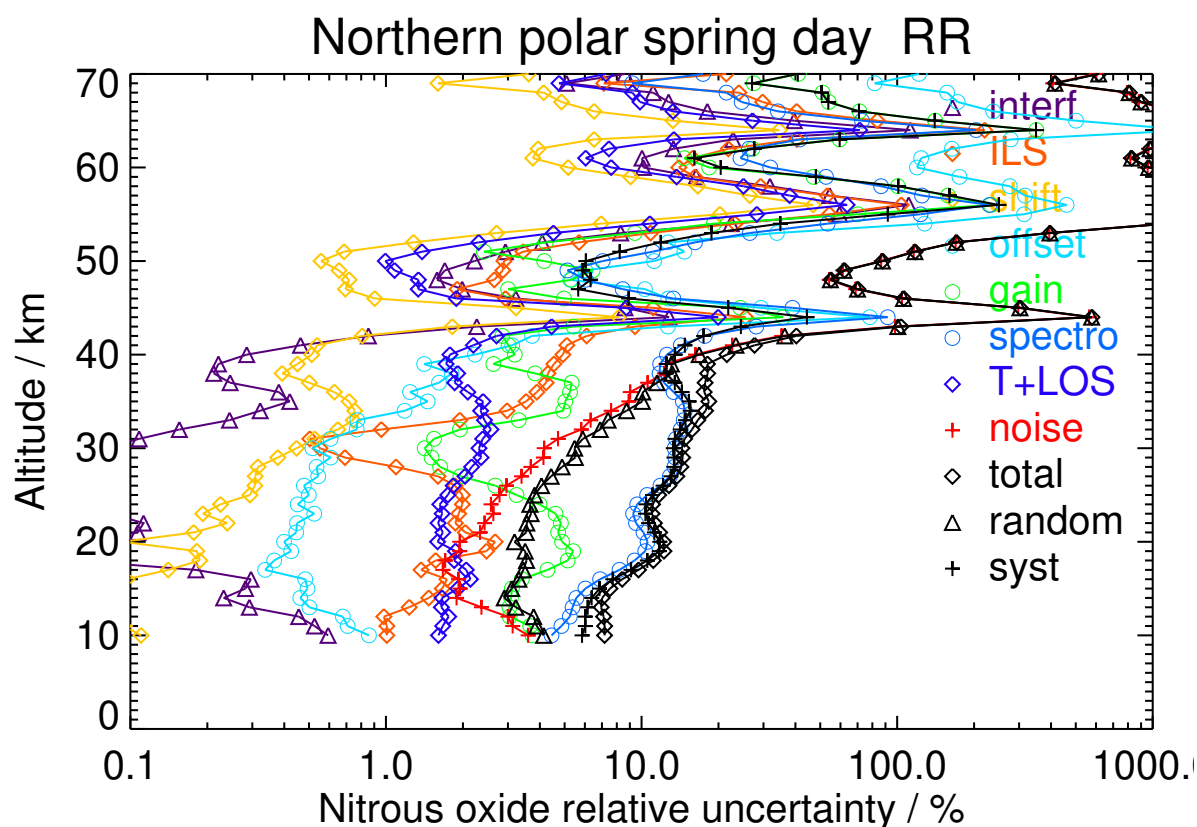

**Figure S173.** V8R\_N2O\_261 Northern polar spring day



**Table S174.** Nitrous oxide error budget for Northern polar spring night. All uncertainties are  $1\sigma$ .

| altitude (km) | mean target (ppbv) | interf (ppbv) | ILS (ppbv) | shift (ppbv) | offset (ppbv) | gain (ppbv) | spectro (ppbv) | T+LOS (ppbv) | noise (ppbv) | random (ppbv) | syst (ppbv) | total (ppbv) |
|---------------|--------------------|---------------|------------|--------------|---------------|-------------|----------------|--------------|--------------|---------------|-------------|--------------|
| 12            | 295.214            | 1.162         | 2.036      | 0.285        | 2.086         | 8.163       | 15.732         | 5.178        | 8.835        | 11.081        | 17.497      | 20.711       |
| 15            | 273.033            | 0.766         | 4.103      | 0.203        | 1.268         | 7.632       | 16.340         | 4.838        | 4.816        | 7.605         | 18.251      | 19.772       |
| 18            | 227.960            | 0.099         | 2.698      | 0.414        | 0.933         | 13.110      | 20.912         | 4.781        | 3.672        | 8.079         | 24.261      | 25.571       |
| 21            | 167.906            | 0.152         | 2.087      | 0.305        | 0.906         | 9.696       | 17.334         | 2.837        | 3.897        | 6.098         | 19.642      | 20.567       |
| 24            | 134.561            | 0.110         | 2.929      | 0.315        | 0.567         | 5.131       | 14.241         | 2.152        | 3.412        | 4.868         | 15.189      | 15.950       |
| 27            | 100.966            | 0.084         | 1.395      | 0.295        | 0.563         | 2.035       | 12.765         | 1.975        | 3.534        | 4.759         | 12.774      | 13.632       |
| 30            | 56.364             | 0.042         | 0.551      | 0.232        | 0.294         | 0.947       | 8.166          | 1.291        | 2.300        | 3.175         | 8.056       | 8.659        |
| 33            | 27.639             | 0.060         | 0.710      | 0.182        | 0.182         | 0.938       | 3.968          | 0.628        | 1.640        | 1.934         | 4.067       | 4.504        |
| 36            | 10.525             | 0.043         | 0.478      | 0.066        | 0.109         | 0.602       | 1.593          | 0.224        | 0.880        | 0.988         | 1.731       | 1.993        |
| 39            | 4.254              | 0.010         | 0.182      | 0.017        | 0.039         | 0.116       | 0.414          | 0.067        | 0.475        | 0.494         | 0.454       | 0.671        |
| 42            | 1.986              | 0.010         | 0.084      | 0.009        | 0.025         | 0.069       | 0.243          | 0.035        | 0.361        | 0.370         | 0.258       | 0.451        |
| 45            | 0.122              | 0.010         | 0.016      | 0.007        | 0.025         | 0.042       | 0.069          | 0.017        | 0.351        | 0.356         | 0.064       | 0.362        |
| 48            | 0.328              | 0.013         | 0.016      | 0.009        | 0.045         | 0.065       | 0.039          | 0.015        | 0.423        | 0.429         | 0.064       | 0.433        |
| 52            | 0.305              | 0.014         | 0.017      | 0.005        | 0.039         | 0.018       | 0.042          | 0.007        | 0.534        | 0.537         | 0.030       | 0.538        |
| 56            | 0.179              | 0.016         | 0.015      | 0.008        | 0.065         | 0.049       | 0.037          | 0.011        | 0.796        | 0.800         | 0.050       | 0.801        |
| 60            | 0.187              | 0.011         | 0.021      | 0.008        | 0.143         | 0.034       | 0.041          | 0.011        | 1.099        | 1.109         | 0.035       | 1.110        |
| 64            | -0.375             | 0.020         | 0.033      | 0.007        | 0.288         | 0.075       | 0.038          | 0.017        | 1.535        | 1.563         | 0.072       | 1.565        |
| 68            | -0.502             | 0.020         | 0.036      | 0.007        | 0.324         | 0.113       | 0.044          | 0.022        | 1.620        | 1.654         | 0.112       | 1.658        |

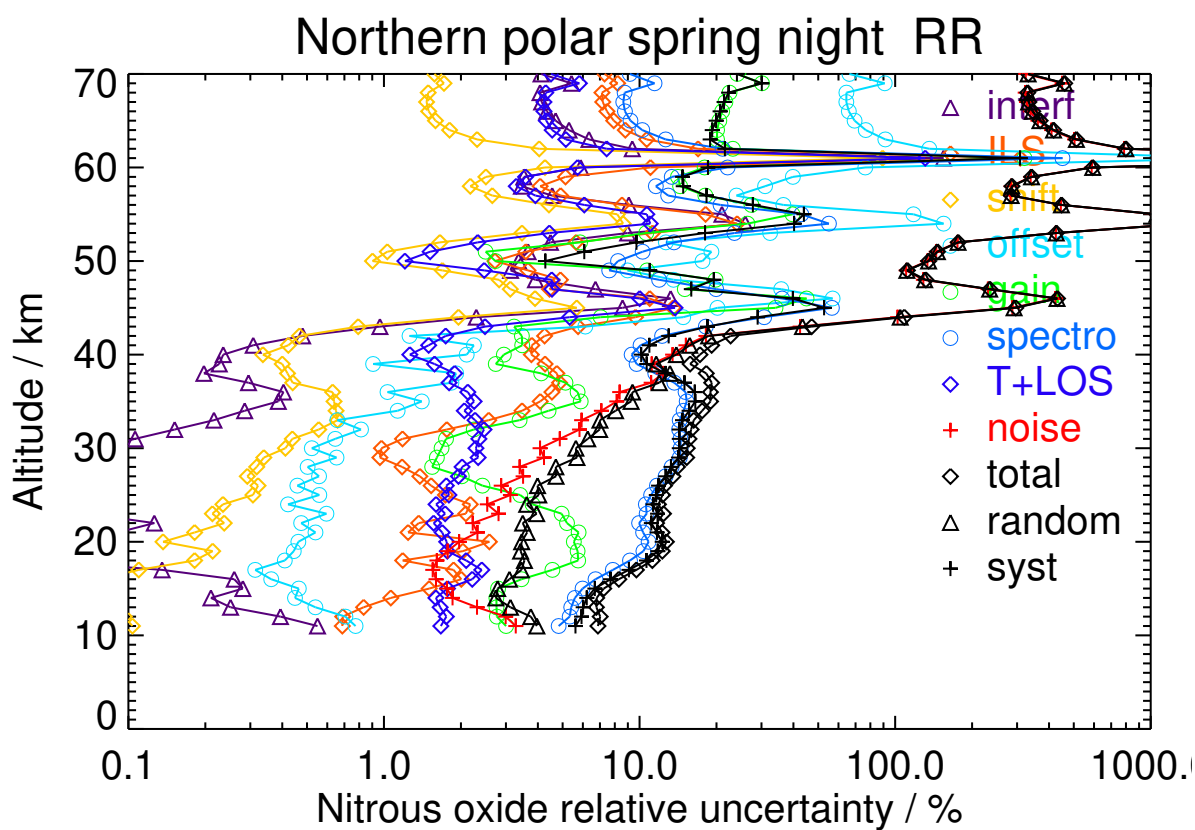

**Figure S174.** V8R\_N2O\_261 Northern polar spring night

**Table S175.** Nitrous oxide error budget for Northern polar summer day. All uncertainties are  $1\sigma$ .

| altitude (km) | mean target (ppbv) | interf (ppbv) | ILS (ppbv) | shift (ppbv) | offset (ppbv) | gain (ppbv) | spectro (ppbv) | T+LOS (ppbv) | noise (ppbv) | random (ppbv) | syst (ppbv) | total (ppbv) |
|---------------|--------------------|---------------|------------|--------------|---------------|-------------|----------------|--------------|--------------|---------------|-------------|--------------|
| 12            | 313.377            | 1.991         | 4.040      | 0.427        | 1.826         | 9.786       | 13.408         | 4.554        | 8.936        | 11.420        | 16.417      | 19.998       |
| 15            | 307.974            | 0.777         | 7.392      | 0.297        | 1.053         | 10.187      | 16.189         | 4.265        | 4.533        | 8.686         | 19.636      | 21.471       |
| 18            | 275.414            | 0.337         | 9.046      | 0.653        | 1.213         | 15.722      | 21.499         | 4.196        | 3.465        | 15.146        | 24.360      | 28.685       |
| 21            | 200.376            | 0.293         | 8.964      | 0.667        | 0.824         | 5.506       | 23.254         | 3.515        | 3.831        | 9.521         | 24.269      | 26.070       |
| 24            | 149.910            | 0.158         | 2.433      | 0.200        | 0.411         | 1.154       | 13.680         | 1.877        | 2.429        | 3.801         | 13.770      | 14.285       |
| 27            | 128.819            | 0.117         | 0.562      | 0.582        | 0.628         | 1.496       | 11.728         | 2.170        | 3.351        | 4.293         | 11.762      | 12.521       |
| 30            | 84.976             | 0.078         | 0.836      | 0.598        | 0.271         | 2.739       | 8.201          | 1.082        | 1.483        | 2.301         | 8.600       | 8.903        |
| 33            | 45.767             | 0.044         | 1.551      | 0.383        | 0.145         | 1.892       | 4.574          | 0.629        | 1.070        | 1.520         | 5.129       | 5.350        |
| 36            | 18.725             | 0.119         | 1.168      | 0.070        | 0.075         | 0.784       | 2.351          | 0.263        | 0.646        | 0.848         | 2.702       | 2.832        |
| 39            | 5.679              | 0.026         | 0.333      | 0.080        | 0.037         | 0.150       | 0.690          | 0.090        | 0.347        | 0.419         | 0.756       | 0.864        |
| 42            | 2.073              | 0.009         | 0.063      | 0.014        | 0.021         | 0.028       | 0.188          | 0.032        | 0.224        | 0.249         | 0.173       | 0.303        |
| 45            | 0.871              | 0.008         | 0.018      | 0.008        | 0.020         | 0.011       | 0.076          | 0.016        | 0.205        | 0.211         | 0.068       | 0.222        |
| 48            | 0.294              | 0.009         | 0.029      | 0.012        | 0.018         | 0.009       | 0.041          | 0.013        | 0.236        | 0.240         | 0.038       | 0.243        |
| 52            | 0.105              | 0.010         | 0.014      | 0.004        | 0.015         | 0.008       | 0.022          | 0.005        | 0.293        | 0.294         | 0.011       | 0.295        |
| 56            | 0.084              | 0.015         | 0.026      | 0.012        | 0.034         | 0.010       | 0.026          | 0.005        | 0.455        | 0.457         | 0.031       | 0.458        |
| 60            | -0.168             | 0.011         | 0.030      | 0.016        | 0.068         | 0.017       | 0.035          | 0.007        | 0.658        | 0.662         | 0.041       | 0.663        |
| 64            | -0.294             | 0.037         | 0.099      | 0.031        | 0.182         | 0.076       | 0.110          | 0.011        | 1.081        | 1.098         | 0.161       | 1.109        |
| 68            | -0.136             | 0.053         | 0.224      | 0.079        | 0.251         | 0.107       | 0.233          | 0.018        | 1.432        | 1.459         | 0.335       | 1.497        |

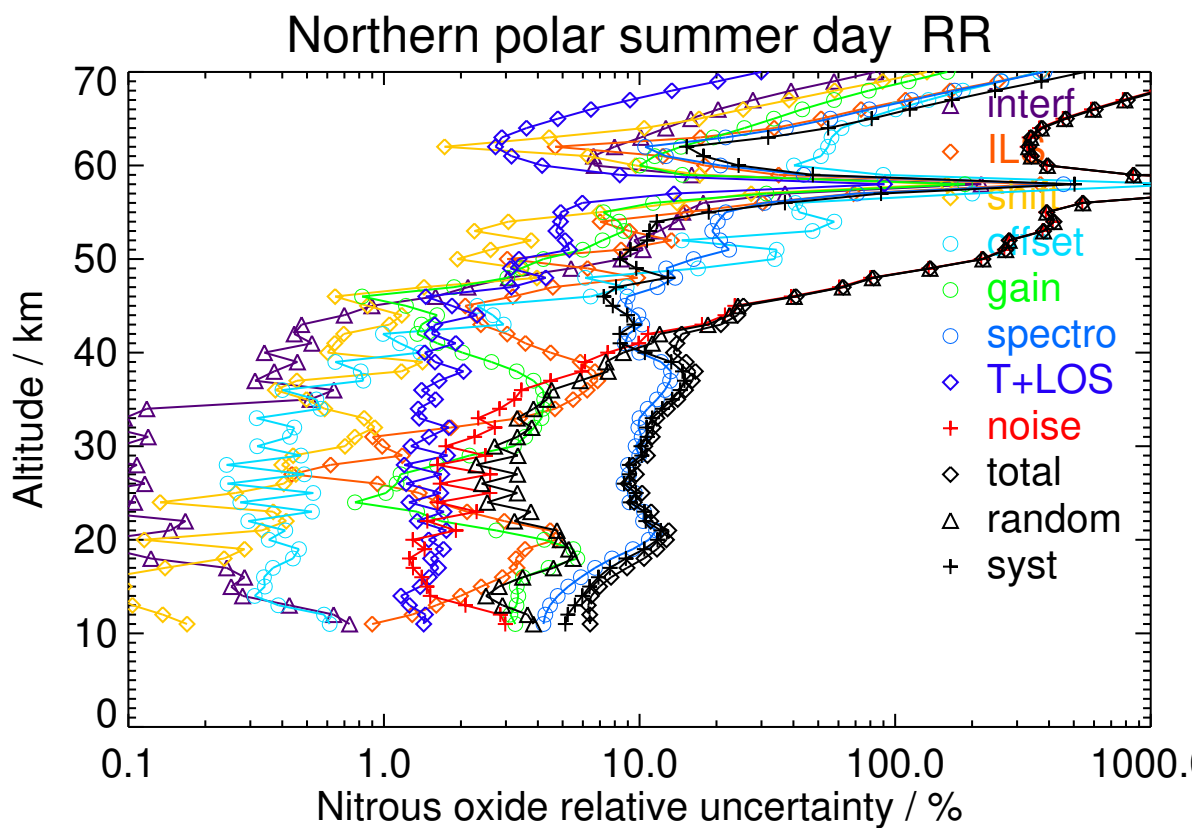

**Figure S175.** V8R\_N2O\_261 Northern polar summer day

**Table S176.** Nitrous oxide error budget for Northern polar summer night. All uncertainties are  $1\sigma$ .

| altitude (km) | mean target (ppbv) | interf (ppbv) | ILS (ppbv) | shift (ppbv) | offset (ppbv) | gain (ppbv) | spectro (ppbv) | T+LOS (ppbv) | noise (ppbv) | random (ppbv) | syst (ppbv) | total (ppbv) |
|---------------|--------------------|---------------|------------|--------------|---------------|-------------|----------------|--------------|--------------|---------------|-------------|--------------|
| 15            | 309.561            | 1.110         | 8.728      | 0.179        | 2.416         | 7.575       | 19.564         | 10.202       | 7.745        | 13.808        | 22.289      | 26.219       |
| 18            | 278.569            | 0.229         | 8.114      | 0.426        | 1.320         | 18.639      | 20.303         | 5.779        | 3.151        | 11.526        | 27.164      | 29.508       |
| 21            | 203.980            | 0.187         | 5.019      | 0.434        | 1.004         | 11.861      | 22.206         | 3.655        | 3.609        | 10.287        | 24.099      | 26.203       |
| 24            | 144.815            | 0.139         | 2.482      | 0.214        | 0.522         | 2.337       | 13.819         | 2.268        | 2.797        | 4.663         | 13.934      | 14.693       |
| 27            | 118.134            | 0.094         | 1.264      | 0.369        | 0.544         | 1.656       | 12.483         | 2.095        | 3.123        | 4.171         | 12.544      | 13.220       |
| 30            | 66.892             | 0.044         | 0.530      | 0.341        | 0.293         | 2.385       | 8.030          | 1.258        | 1.730        | 2.540         | 8.293       | 8.674        |
| 33            | 27.539             | 0.054         | 1.040      | 0.195        | 0.149         | 1.427       | 3.620          | 0.688        | 1.194        | 1.531         | 3.980       | 4.265        |
| 36            | 7.810              | 0.043         | 0.466      | 0.125        | 0.069         | 0.277       | 1.251          | 0.203        | 0.653        | 0.767         | 1.327       | 1.533        |
| 39            | 2.240              | 0.018         | 0.138      | 0.025        | 0.028         | 0.055       | 0.258          | 0.056        | 0.332        | 0.365         | 0.265       | 0.451        |
| 42            | 0.683              | 0.010         | 0.025      | 0.011        | 0.020         | 0.023       | 0.094          | 0.021        | 0.236        | 0.244         | 0.085       | 0.258        |
| 45            | 0.217              | 0.008         | 0.011      | 0.006        | 0.016         | 0.022       | 0.028          | 0.010        | 0.235        | 0.238         | 0.021       | 0.239        |
| 48            | 0.285              | 0.011         | 0.020      | 0.013        | 0.026         | 0.034       | 0.033          | 0.010        | 0.293        | 0.297         | 0.036       | 0.300        |
| 52            | 0.038              | 0.014         | 0.009      | 0.003        | 0.022         | 0.008       | 0.026          | 0.005        | 0.386        | 0.388         | 0.012       | 0.388        |
| 56            | 0.409              | 0.019         | 0.016      | 0.012        | 0.045         | 0.037       | 0.036          | 0.008        | 0.617        | 0.620         | 0.041       | 0.622        |
| 60            | 0.188              | 0.014         | 0.013      | 0.008        | 0.115         | 0.022       | 0.039          | 0.009        | 0.929        | 0.937         | 0.030       | 0.937        |
| 64            | -0.360             | 0.031         | 0.041      | 0.027        | 0.257         | 0.198       | 0.096          | 0.029        | 1.458        | 1.484         | 0.206       | 1.498        |
| 68            | -0.267             | 0.039         | 0.085      | 0.056        | 0.282         | 0.266       | 0.163          | 0.038        | 1.536        | 1.569         | 0.298       | 1.597        |

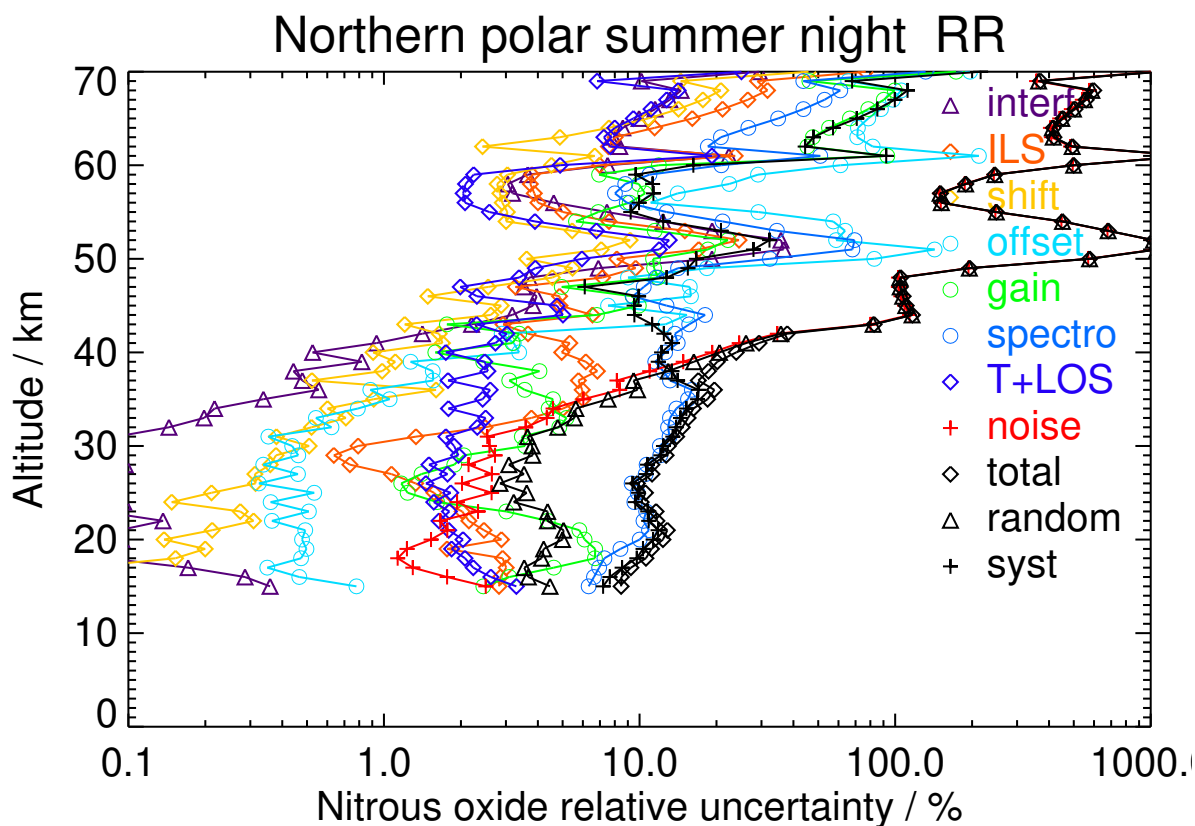

**Figure S176.** V8R\_N2O\_261 Northern polar summer night

**Table S177.** Nitrous oxide error budget for Northern polar autumn day. All uncertainties are  $1\sigma$ .

| altitude (km) | mean target (ppbv) | interf (ppbv) | ILS (ppbv) | shift (ppbv) | offset (ppbv) | gain (ppbv) | spectro (ppbv) | T+LOS (ppbv) | noise (ppbv) | random (ppbv) | syst (ppbv) | total (ppbv) |
|---------------|--------------------|---------------|------------|--------------|---------------|-------------|----------------|--------------|--------------|---------------|-------------|--------------|
| 15            | 280.757            | 2.866         | 2.806      | 0.199        | 1.838         | 6.452       | 17.130         | 5.639        | 7.503        | 10.457        | 18.258      | 21.040       |
| 18            | 237.518            | 0.564         | 2.951      | 0.484        | 0.758         | 11.689      | 21.160         | 5.027        | 3.369        | 8.800         | 23.524      | 25.116       |
| 21            | 168.289            | 0.319         | 4.015      | 0.210        | 0.915         | 10.710      | 18.682         | 2.975        | 3.740        | 8.747         | 20.668      | 22.443       |
| 24            | 123.662            | 0.229         | 3.319      | 0.249        | 0.646         | 5.484       | 13.534         | 2.281        | 3.443        | 5.867         | 14.402      | 15.551       |
| 27            | 76.738             | 0.115         | 2.498      | 0.167        | 0.526         | 2.273       | 11.438         | 1.712        | 3.054        | 5.339         | 11.239      | 12.442       |
| 30            | 30.126             | 0.063         | 0.681      | 0.134        | 0.356         | 1.791       | 5.590          | 0.977        | 1.857        | 4.048         | 4.805       | 6.282        |
| 33            | 8.602              | 0.048         | 0.373      | 0.068        | 0.177         | 0.685       | 1.900          | 0.389        | 1.247        | 2.069         | 1.298       | 2.442        |
| 36            | 3.115              | 0.026         | 0.246      | 0.032        | 0.070         | 0.468       | 0.714          | 0.114        | 0.628        | 1.034         | 0.364       | 1.097        |
| 39            | 2.141              | 0.014         | 0.161      | 0.018        | 0.046         | 0.275       | 0.366          | 0.044        | 0.490        | 0.671         | 0.173       | 0.693        |
| 42            | 2.076              | 0.010         | 0.114      | 0.014        | 0.028         | 0.165       | 0.268          | 0.025        | 0.471        | 0.560         | 0.150       | 0.580        |
| 45            | 1.506              | 0.012         | 0.059      | 0.009        | 0.026         | 0.066       | 0.232          | 0.017        | 0.526        | 0.570         | 0.119       | 0.583        |
| 48            | 0.717              | 0.015         | 0.025      | 0.007        | 0.063         | 0.054       | 0.108          | 0.019        | 0.655        | 0.665         | 0.077       | 0.670        |
| 52            | 0.809              | 0.018         | 0.021      | 0.009        | 0.064         | 0.050       | 0.065          | 0.014        | 0.801        | 0.807         | 0.056       | 0.809        |
| 56            | 0.724              | 0.020         | 0.020      | 0.010        | 0.099         | 0.064       | 0.069          | 0.017        | 1.077        | 1.084         | 0.069       | 1.086        |
| 60            | -0.101             | 0.015         | 0.027      | 0.008        | 0.197         | 0.049       | 0.049          | 0.015        | 1.380        | 1.396         | 0.033       | 1.396        |
| 64            | -0.599             | 0.022         | 0.058      | 0.013        | 0.322         | 0.163       | 0.056          | 0.029        | 1.728        | 1.763         | 0.137       | 1.768        |
| 68            | -0.668             | 0.024         | 0.067      | 0.017        | 0.336         | 0.207       | 0.064          | 0.035        | 1.698        | 1.737         | 0.178       | 1.746        |

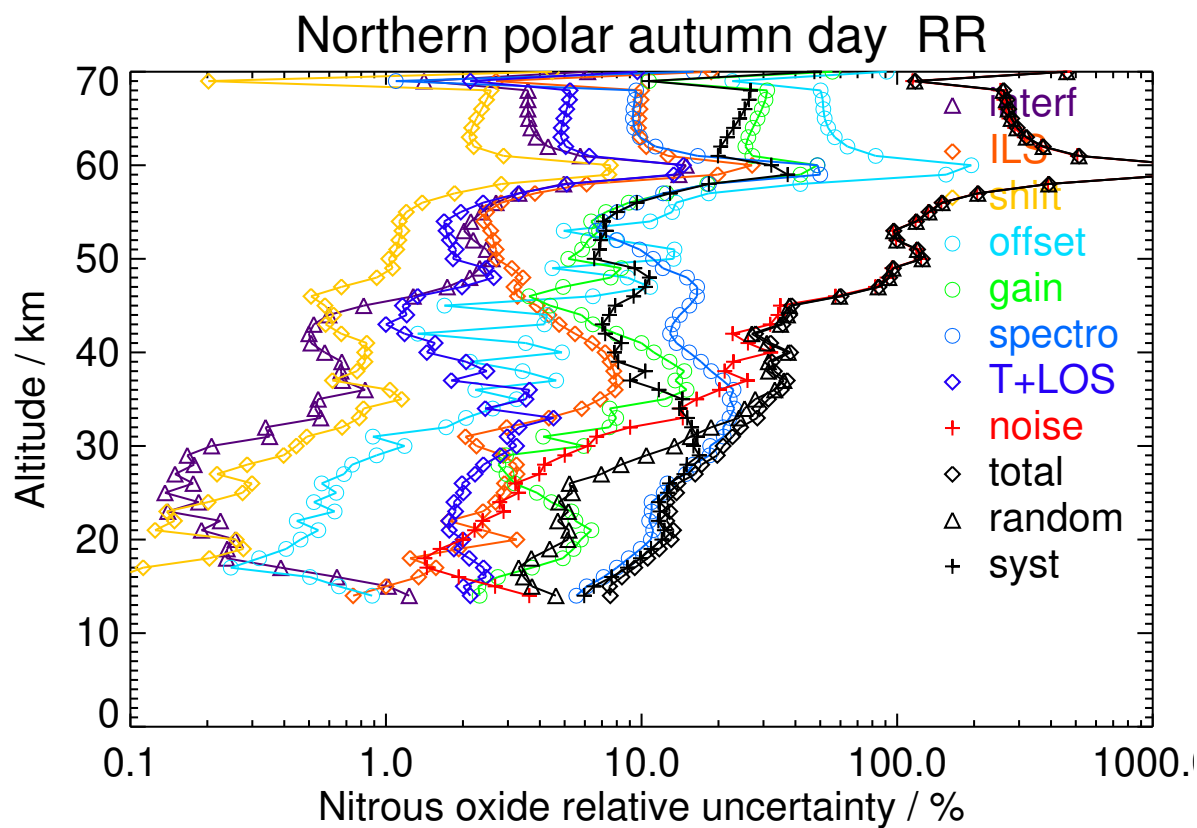

**Figure S177.** V8R\_N2O\_261 Northern polar autumn day

**Table S178.** Nitrous oxide error budget for Northern polar autumn night. All uncertainties are  $1\sigma$ .

| altitude (km) | mean target (ppbv) | interf (ppbv) | ILS (ppbv) | shift (ppbv) | offset (ppbv) | gain (ppbv) | spectro (ppbv) | T+LOS (ppbv) | noise (ppbv) | random (ppbv) | syst (ppbv) | total (ppbv) |
|---------------|--------------------|---------------|------------|--------------|---------------|-------------|----------------|--------------|--------------|---------------|-------------|--------------|
| 15            | 275.688            | 3.118         | 2.609      | 0.263        | 1.874         | 6.134       | 17.998         | 5.848        | 7.315        | 10.771        | 18.798      | 21.665       |
| 18            | 231.823            | 0.612         | 2.327      | 0.545        | 0.831         | 12.031      | 22.358         | 4.962        | 3.567        | 8.051         | 24.979      | 26.244       |
| 21            | 169.711            | 0.331         | 3.707      | 0.203        | 0.836         | 9.101       | 19.640         | 2.798        | 3.767        | 7.526         | 21.179      | 22.476       |
| 24            | 121.672            | 0.313         | 3.438      | 0.233        | 0.619         | 5.277       | 14.808         | 2.221        | 3.349        | 5.821         | 15.548      | 16.602       |
| 27            | 69.227             | 0.128         | 2.140      | 0.181        | 0.523         | 2.130       | 11.463         | 1.610        | 3.028        | 5.313         | 11.153      | 12.353       |
| 30            | 27.878             | 0.066         | 0.600      | 0.187        | 0.338         | 2.010       | 4.405          | 0.813        | 1.718        | 3.353         | 4.041       | 5.251        |
| 33            | 20.534             | 0.065         | 0.608      | 0.286        | 0.227         | 2.055       | 3.136          | 0.387        | 1.253        | 3.580         | 1.861       | 4.035        |
| 36            | 13.088             | 0.052         | 1.012      | 0.195        | 0.113         | 1.241       | 2.626          | 0.180        | 0.731        | 2.876         | 1.345       | 3.175        |
| 39            | 7.512              | 0.037         | 0.765      | 0.072        | 0.081         | 0.680       | 1.594          | 0.099        | 0.580        | 1.805         | 0.831       | 1.987        |
| 42            | 4.060              | 0.019         | 0.402      | 0.034        | 0.044         | 0.330       | 0.925          | 0.056        | 0.512        | 1.081         | 0.478       | 1.181        |
| 45            | 1.620              | 0.013         | 0.093      | 0.021        | 0.027         | 0.067       | 0.350          | 0.027        | 0.506        | 0.605         | 0.165       | 0.628        |
| 48            | 1.197              | 0.015         | 0.032      | 0.010        | 0.062         | 0.078       | 0.104          | 0.024        | 0.613        | 0.625         | 0.091       | 0.632        |
| 52            | 0.990              | 0.018         | 0.034      | 0.010        | 0.059         | 0.044       | 0.085          | 0.014        | 0.723        | 0.729         | 0.077       | 0.733        |
| 56            | 0.423              | 0.020         | 0.037      | 0.015        | 0.094         | 0.078       | 0.067          | 0.018        | 1.018        | 1.026         | 0.082       | 1.029        |
| 60            | 0.549              | 0.014         | 0.035      | 0.013        | 0.192         | 0.077       | 0.057          | 0.022        | 1.339        | 1.355         | 0.070       | 1.357        |
| 64            | 0.433              | 0.021         | 0.102      | 0.029        | 0.317         | 0.081       | 0.109          | 0.023        | 1.711        | 1.748         | 0.059       | 1.749        |
| 68            | -0.285             | 0.018         | 0.078      | 0.018        | 0.335         | 0.087       | 0.076          | 0.022        | 1.688        | 1.725         | 0.075       | 1.727        |

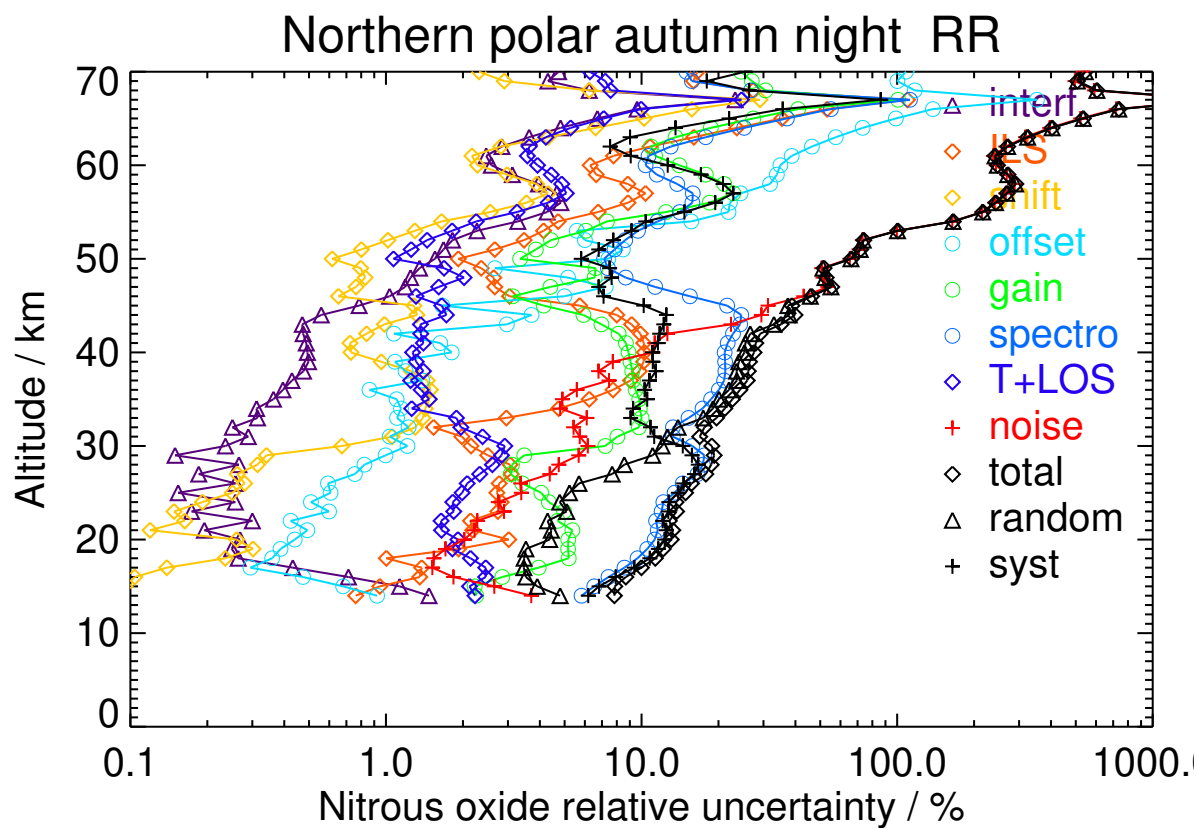

**Figure S178.** V8R\_N2O\_261 Northern polar autumn night

**Table S179.** Nitrous oxide error budget for Northern midlatitude winter day. All uncertainties are  $1\sigma$ .

| altitude (km) | mean target (ppbv) | interf (ppbv) | ILS (ppbv) | shift (ppbv) | offset (ppbv) | gain (ppbv) | spectro (ppbv) | T+LOS (ppbv) | noise (ppbv) | random (ppbv) | syst (ppbv) | total (ppbv) |
|---------------|--------------------|---------------|------------|--------------|---------------|-------------|----------------|--------------|--------------|---------------|-------------|--------------|
| 12            | 298.156            | 1.653         | 3.711      | 0.201        | 2.210         | 7.875       | 13.159         | 4.825        | 9.962        | 12.106        | 15.250      | 19.471       |
| 15            | 290.074            | 0.977         | 9.642      | 0.162        | 1.380         | 10.329      | 15.343         | 4.439        | 5.252        | 9.749         | 19.753      | 22.028       |
| 18            | 263.462            | 0.381         | 9.144      | 0.490        | 1.726         | 17.119      | 23.324         | 5.574        | 4.164        | 13.865        | 27.933      | 31.184       |
| 21            | 207.522            | 0.259         | 8.192      | 0.337        | 0.699         | 6.614       | 21.918         | 3.335        | 3.796        | 9.403         | 23.001      | 24.849       |
| 24            | 183.492            | 0.242         | 6.520      | 0.282        | 0.758         | 4.045       | 20.234         | 2.738        | 3.361        | 8.316         | 20.460      | 22.086       |
| 27            | 130.396            | 0.158         | 2.646      | 0.474        | 0.633         | 2.264       | 13.781         | 2.170        | 3.265        | 6.874         | 13.069      | 14.767       |
| 30            | 112.650            | 0.092         | 1.699      | 0.597        | 0.451         | 3.396       | 10.350         | 1.596        | 2.237        | 5.076         | 10.193      | 11.386       |
| 33            | 73.858             | 0.069         | 2.355      | 0.522        | 0.301         | 2.710       | 9.591          | 1.108        | 1.636        | 4.215         | 9.559       | 10.448       |
| 36            | 20.317             | 0.056         | 1.325      | 0.167        | 0.167         | 1.040       | 3.922          | 0.438        | 0.949        | 2.725         | 3.456       | 4.401        |
| 39            | 6.961              | 0.026         | 0.426      | 0.049        | 0.098         | 0.287       | 1.113          | 0.141        | 0.579        | 1.122         | 0.781       | 1.368        |
| 42            | 3.921              | 0.012         | 0.198      | 0.037        | 0.073         | 0.118       | 0.387          | 0.056        | 0.472        | 0.579         | 0.317       | 0.660        |
| 45            | 3.366              | 0.012         | 0.156      | 0.027        | 0.076         | 0.083       | 0.301          | 0.034        | 0.531        | 0.593         | 0.245       | 0.642        |
| 48            | 1.683              | 0.015         | 0.054      | 0.017        | 0.086         | 0.034       | 0.223          | 0.025        | 0.591        | 0.620         | 0.168       | 0.642        |
| 52            | 0.385              | 0.017         | 0.037      | 0.014        | 0.092         | 0.020       | 0.088          | 0.012        | 0.750        | 0.760         | 0.061       | 0.762        |
| 56            | 0.150              | 0.018         | 0.035      | 0.019        | 0.124         | 0.030       | 0.054          | 0.009        | 1.064        | 1.073         | 0.044       | 1.074        |
| 60            | -0.408             | 0.038         | 0.246      | 0.080        | 0.228         | 0.095       | 0.235          | 0.026        | 1.520        | 1.555         | 0.282       | 1.580        |
| 64            | -0.665             | 0.068         | 0.437      | 0.170        | 0.330         | 0.229       | 0.497          | 0.053        | 1.789        | 1.859         | 0.616       | 1.959        |
| 68            | -0.890             | 0.018         | 0.028      | 0.025        | 0.357         | 0.259       | 0.131          | 0.031        | 1.712        | 1.752         | 0.272       | 1.773        |

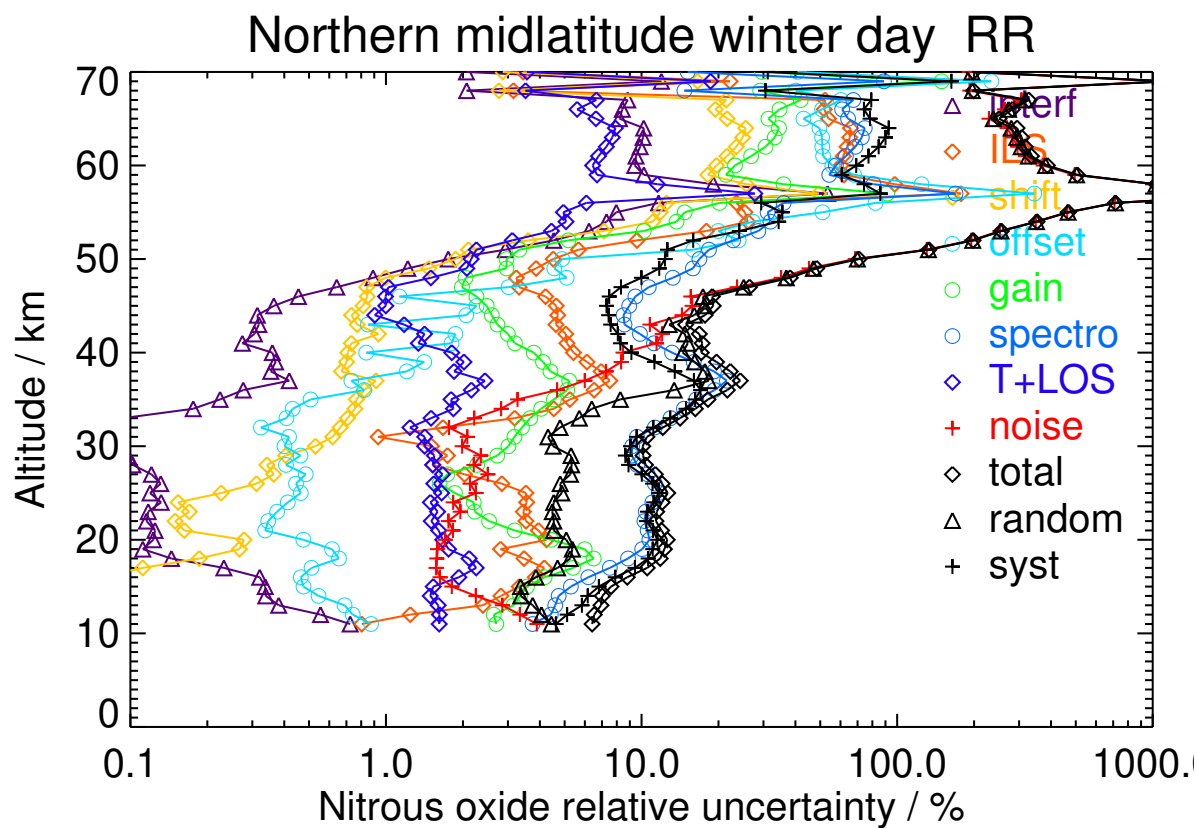

**Figure S179.** V8R\_N2O\_261 Northern midlatitude winter day

**Table S180.** Nitrous oxide error budget for Northern midlatitude winter night. All uncertainties are  $1\sigma$ .

| altitude<br>(km) | mean target<br>(ppbv) | interf<br>(ppbv) | ILS<br>(ppbv) | shift<br>(ppbv) | offset<br>(ppbv) | gain<br>(ppbv) | spectro<br>(ppbv) | T+LOS<br>(ppbv) | noise<br>(ppbv) | random<br>(ppbv) | syst<br>(ppbv) | total<br>(ppbv) |
|------------------|-----------------------|------------------|---------------|-----------------|------------------|----------------|-------------------|-----------------|-----------------|------------------|----------------|-----------------|
| 12               | 306.925               | 1.454            | 5.904         | 0.208           | 2.342            | 9.991          | 14.578            | 5.151           | 9.453           | 11.796           | 18.209         | 21.696          |
| 15               | 304.321               | 0.989            | 8.782         | 0.232           | 1.370            | 9.377          | 16.462            | 4.749           | 5.117           | 10.045           | 19.667         | 22.084          |
| 18               | 262.996               | 0.382            | 7.545         | 0.536           | 1.423            | 13.296         | 21.487            | 4.845           | 3.865           | 13.608           | 23.475         | 27.134          |
| 21               | 211.667               | 0.339            | 10.344        | 0.350           | 0.857            | 5.522          | 21.867            | 3.745           | 4.008           | 9.800            | 23.466         | 25.430          |
| 24               | 185.878               | 0.252            | 6.531         | 0.286           | 0.785            | 3.055          | 19.991            | 2.751           | 3.480           | 7.831            | 20.267         | 21.727          |
| 27               | 135.299               | 0.169            | 2.545         | 0.535           | 0.684            | 2.066          | 15.471            | 2.319           | 3.336           | 6.622            | 14.951         | 16.352          |
| 30               | 101.907               | 0.091            | 1.518         | 0.448           | 0.380            | 2.348          | 9.956             | 1.533           | 2.180           | 5.234            | 9.327          | 10.695          |
| 33               | 65.586                | 0.082            | 1.778         | 0.546           | 0.287            | 2.217          | 8.256             | 0.985           | 1.564           | 3.204            | 8.353          | 8.947           |
| 36               | 19.000                | 0.060            | 1.308         | 0.135           | 0.170            | 0.921          | 3.372             | 0.395           | 0.898           | 2.319            | 3.092          | 3.865           |
| 39               | 6.805                 | 0.020            | 0.453         | 0.048           | 0.097            | 0.337          | 0.884             | 0.115           | 0.517           | 0.915            | 0.745          | 1.180           |
| 42               | 4.387                 | 0.012            | 0.239         | 0.035           | 0.075            | 0.164          | 0.445             | 0.056           | 0.433           | 0.614            | 0.322          | 0.693           |
| 45               | 3.925                 | 0.013            | 0.164         | 0.034           | 0.075            | 0.111          | 0.331             | 0.035           | 0.475           | 0.554            | 0.274          | 0.618           |
| 48               | 2.308                 | 0.016            | 0.054         | 0.017           | 0.082            | 0.037          | 0.272             | 0.027           | 0.524           | 0.564            | 0.207          | 0.601           |
| 52               | 0.418                 | 0.018            | 0.028         | 0.013           | 0.093            | 0.011          | 0.081             | 0.012           | 0.708           | 0.717            | 0.067          | 0.720           |
| 56               | 0.270                 | 0.017            | 0.036         | 0.018           | 0.125            | 0.022          | 0.053             | 0.010           | 1.038           | 1.048            | 0.036          | 1.048           |
| 60               | 0.164                 | 0.048            | 0.280         | 0.097           | 0.226            | 0.095          | 0.267             | 0.032           | 1.513           | 1.546            | 0.347          | 1.584           |
| 64               | -0.141                | 0.087            | 0.517         | 0.212           | 0.331            | 0.237          | 0.591             | 0.064           | 1.782           | 1.867            | 0.725          | 2.003           |
| 68               | 0.399                 | 0.027            | 0.096         | 0.039           | 0.343            | 0.133          | 0.142             | 0.020           | 1.673           | 1.713            | 0.180          | 1.722           |

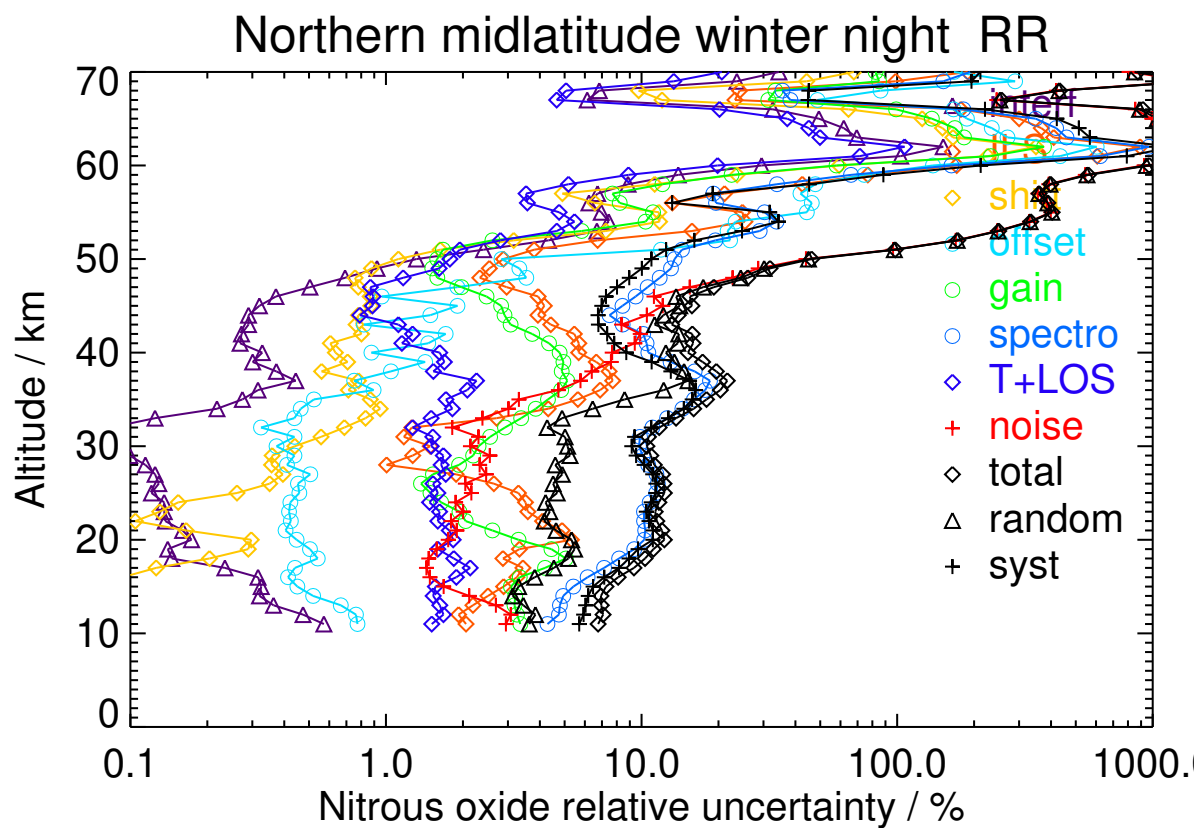

**Figure S180.** V8R\_N2O\_261 Northern midlatitude winter night



**Table S181.** Nitrous oxide error budget for Northern midlatitude spring day. All uncertainties are  $1\sigma$ .

| altitude (km) | mean target (ppbv) | interf (ppbv) | ILS (ppbv) | shift (ppbv) | offset (ppbv) | gain (ppbv) | spectro (ppbv) | T+LOS (ppbv) | noise (ppbv) | random (ppbv) | syst (ppbv) | total (ppbv) |
|---------------|--------------------|---------------|------------|--------------|---------------|-------------|----------------|--------------|--------------|---------------|-------------|--------------|
| 12            | 311.038            | 1.578         | 4.299      | 0.328        | 1.799         | 10.536      | 14.729         | 4.555        | 8.226        | 10.766        | 18.021      | 20.992       |
| 15            | 301.139            | 1.041         | 8.135      | 0.221        | 1.327         | 11.526      | 16.661         | 4.908        | 5.002        | 9.109         | 21.110      | 22.992       |
| 18            | 266.946            | 0.383         | 9.113      | 0.556        | 1.927         | 20.844      | 22.224         | 6.112        | 4.311        | 13.679        | 29.739      | 32.734       |
| 21            | 199.487            | 0.267         | 5.298      | 0.252        | 0.901         | 10.413      | 21.341         | 3.437        | 3.807        | 10.784        | 22.425      | 24.883       |
| 24            | 155.993            | 0.180         | 3.321      | 0.335        | 0.763         | 3.335       | 15.703         | 2.655        | 3.842        | 6.375         | 15.831      | 17.066       |
| 27            | 136.277            | 0.171         | 1.334      | 0.443        | 0.540         | 2.577       | 13.062         | 2.065        | 3.115        | 5.884         | 12.605      | 13.911       |
| 30            | 100.867            | 0.088         | 0.822      | 0.592        | 0.402         | 2.956       | 11.668         | 1.726        | 2.515        | 5.769         | 11.050      | 12.465       |
| 33            | 52.120             | 0.081         | 1.746      | 0.355        | 0.244         | 1.816       | 7.125          | 0.935        | 1.631        | 4.103         | 6.633       | 7.800        |
| 36            | 17.366             | 0.057         | 1.103      | 0.132        | 0.148         | 0.840       | 2.679          | 0.332        | 0.915        | 1.847         | 2.584       | 3.176        |
| 39            | 8.258              | 0.032         | 0.516      | 0.052        | 0.088         | 0.453       | 1.047          | 0.109        | 0.546        | 1.155         | 0.746       | 1.375        |
| 42            | 5.430              | 0.013         | 0.281      | 0.051        | 0.065         | 0.238       | 0.581          | 0.057        | 0.439        | 0.652         | 0.501       | 0.822        |
| 45            | 3.153              | 0.012         | 0.086      | 0.022        | 0.059         | 0.082       | 0.287          | 0.032        | 0.442        | 0.497         | 0.224       | 0.545        |
| 48            | 2.536              | 0.016         | 0.045      | 0.016        | 0.071         | 0.058       | 0.195          | 0.021        | 0.489        | 0.517         | 0.148       | 0.537        |
| 52            | 1.150              | 0.018         | 0.036      | 0.009        | 0.075         | 0.022       | 0.125          | 0.016        | 0.627        | 0.639         | 0.094       | 0.645        |
| 56            | 0.570              | 0.018         | 0.022      | 0.012        | 0.097         | 0.024       | 0.068          | 0.010        | 0.933        | 0.940         | 0.051       | 0.941        |
| 60            | 0.093              | 0.020         | 0.078      | 0.020        | 0.168         | 0.039       | 0.074          | 0.012        | 1.258        | 1.272         | 0.080       | 1.275        |
| 64            | -0.152             | 0.041         | 0.178      | 0.064        | 0.301         | 0.155       | 0.205          | 0.024        | 1.649        | 1.688         | 0.251       | 1.707        |
| 68            | -0.367             | 0.046         | 0.196      | 0.068        | 0.322         | 0.173       | 0.217          | 0.027        | 1.653        | 1.697         | 0.284       | 1.720        |

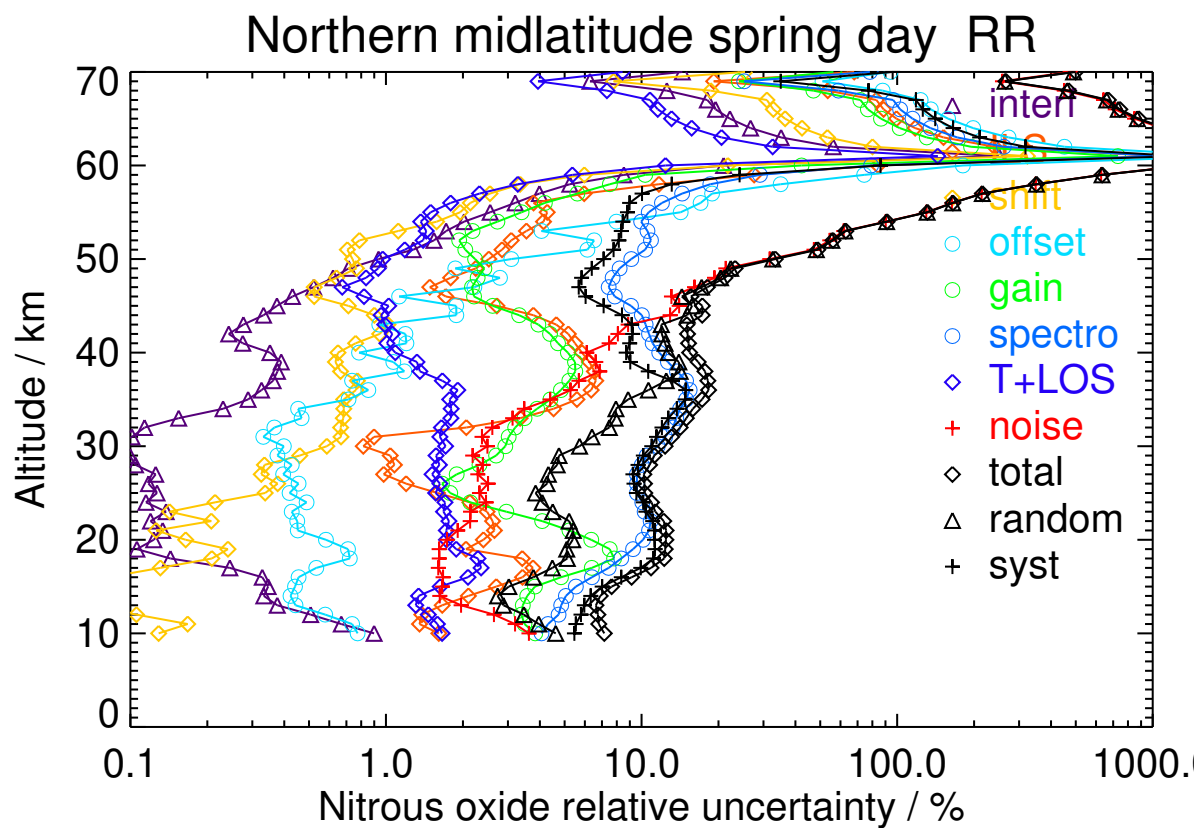

**Figure S181.** V8R\_N2O\_261 Northern midlatitude spring day



**Table S182.** Nitrous oxide error budget for Northern midlatitude spring night. All uncertainties are  $1\sigma$ .

| altitude<br>(km) | mean target<br>(ppbv) | interf<br>(ppbv) | ILS<br>(ppbv) | shift<br>(ppbv) | offset<br>(ppbv) | gain<br>(ppbv) | spectro<br>(ppbv) | T+LOS<br>(ppbv) | noise<br>(ppbv) | random<br>(ppbv) | syst<br>(ppbv) | total<br>(ppbv) |
|------------------|-----------------------|------------------|---------------|-----------------|------------------|----------------|-------------------|-----------------|-----------------|------------------|----------------|-----------------|
| 12               | 311.288               | 1.528            | 4.385         | 0.274           | 1.931            | 10.319         | 14.243            | 4.743           | 8.513           | 10.755           | 17.720         | 20.728          |
| 15               | 289.071               | 0.957            | 6.851         | 0.212           | 1.242            | 10.167         | 15.660            | 4.489           | 4.659           | 8.123            | 19.337         | 20.973          |
| 18               | 257.225               | 0.277            | 7.547         | 0.475           | 1.651            | 17.887         | 20.693            | 4.923           | 4.007           | 13.747           | 25.680         | 29.128          |
| 21               | 199.948               | 0.281            | 6.372         | 0.337           | 0.960            | 10.047         | 21.309            | 3.318           | 3.692           | 10.614           | 22.555         | 24.927          |
| 24               | 156.668               | 0.195            | 2.854         | 0.348           | 0.705            | 4.581          | 15.007            | 2.487           | 3.663           | 6.816            | 15.104         | 16.571          |
| 27               | 134.607               | 0.161            | 1.195         | 0.472           | 0.505            | 2.094          | 14.016            | 2.081           | 3.171           | 5.201            | 13.788         | 14.736          |
| 30               | 90.682                | 0.082            | 0.775         | 0.514           | 0.356            | 1.959          | 10.696            | 1.609           | 2.412           | 4.130            | 10.516         | 11.299          |
| 33               | 48.542                | 0.078            | 1.570         | 0.359           | 0.252            | 1.847          | 5.925             | 0.807           | 1.598           | 2.508            | 6.172          | 6.662           |
| 36               | 18.832                | 0.058            | 1.093         | 0.159           | 0.166            | 0.931          | 2.739             | 0.325           | 0.964           | 1.895            | 2.658          | 3.264           |
| 39               | 8.498                 | 0.033            | 0.511         | 0.065           | 0.098            | 0.478          | 1.034             | 0.112           | 0.570           | 1.087            | 0.854          | 1.383           |
| 42               | 5.575                 | 0.014            | 0.282         | 0.057           | 0.071            | 0.266          | 0.587             | 0.054           | 0.446           | 0.691            | 0.476          | 0.840           |
| 45               | 3.244                 | 0.012            | 0.097         | 0.023           | 0.066            | 0.092          | 0.332             | 0.033           | 0.453           | 0.528            | 0.247          | 0.583           |
| 48               | 2.328                 | 0.016            | 0.039         | 0.012           | 0.072            | 0.047          | 0.188             | 0.020           | 0.491           | 0.519            | 0.128          | 0.535           |
| 52               | 1.440                 | 0.019            | 0.032         | 0.009           | 0.086            | 0.023          | 0.116             | 0.014           | 0.662           | 0.672            | 0.098          | 0.679           |
| 56               | 0.531                 | 0.017            | 0.030         | 0.014           | 0.109            | 0.031          | 0.067             | 0.011           | 0.963           | 0.971            | 0.061          | 0.973           |
| 60               | 0.553                 | 0.020            | 0.084         | 0.019           | 0.171            | 0.030          | 0.074             | 0.013           | 1.274           | 1.289            | 0.077          | 1.291           |
| 64               | -0.059                | 0.039            | 0.184         | 0.059           | 0.300            | 0.146          | 0.190             | 0.024           | 1.654           | 1.693            | 0.238          | 1.710           |
| 68               | -0.334                | 0.045            | 0.214         | 0.071           | 0.326            | 0.170          | 0.225             | 0.024           | 1.664           | 1.711            | 0.283          | 1.735           |

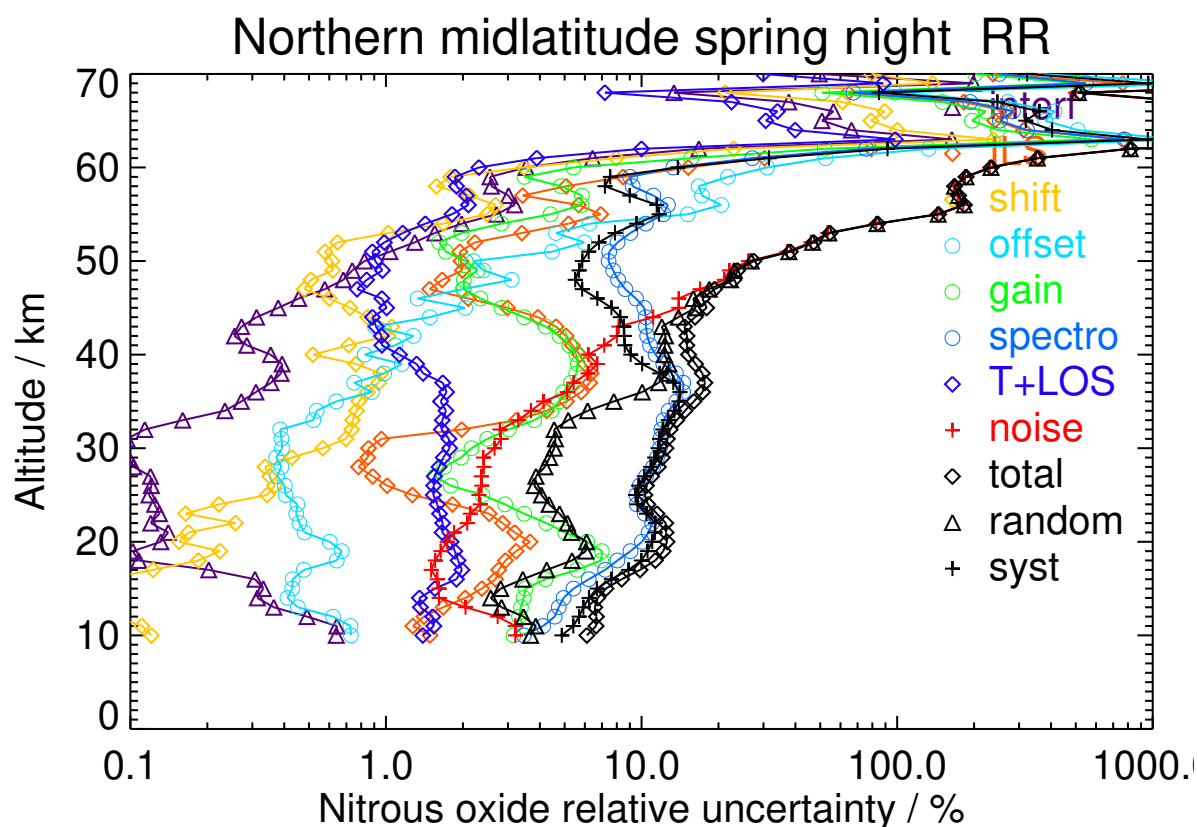

**Figure S182.** V8R\_N2O\_261 Northern midlatitude spring night

**Table S183.** Nitrous oxide error budget for Northern midlatitude summer day. All uncertainties are  $1\sigma$ .

| altitude (km) | mean target (ppbv) | interf (ppbv) | ILS (ppbv) | shift (ppbv) | offset (ppbv) | gain (ppbv) | spectro (ppbv) | T+LOS (ppbv) | noise (ppbv) | random (ppbv) | syst (ppbv) | total (ppbv) |
|---------------|--------------------|---------------|------------|--------------|---------------|-------------|----------------|--------------|--------------|---------------|-------------|--------------|
| 12            | 360.365            | 2.013         | 12.340     | 0.186        | 2.196         | 15.622      | 15.123         | 5.350        | 8.781        | 11.107        | 24.825      | 27.197       |
| 15            | 347.376            | 1.450         | 14.319     | 0.173        | 2.125         | 11.152      | 16.259         | 7.574        | 7.518        | 11.908        | 23.927      | 26.726       |
| 18            | 321.453            | 1.286         | 6.535      | 0.459        | 2.238         | 10.168      | 23.259         | 7.385        | 6.014        | 12.038        | 25.292      | 28.011       |
| 21            | 244.405            | 0.516         | 10.045     | 0.406        | 0.696         | 2.147       | 24.463         | 5.161        | 4.964        | 8.418         | 26.178      | 27.498       |
| 24            | 180.784            | 0.245         | 4.213      | 0.121        | 0.566         | 2.839       | 18.499         | 2.647        | 3.476        | 5.130         | 19.005      | 19.685       |
| 27            | 139.331            | 0.177         | 1.578      | 0.510        | 0.539         | 2.274       | 12.087         | 2.107        | 3.391        | 4.463         | 12.262      | 13.049       |
| 30            | 120.974            | 0.104         | 1.415      | 0.608        | 0.353         | 2.687       | 11.859         | 1.638        | 2.345        | 3.325         | 12.144      | 12.591       |
| 33            | 69.882             | 0.070         | 1.971      | 0.623        | 0.269         | 2.060       | 7.830          | 0.960        | 1.751        | 2.782         | 8.134       | 8.596        |
| 36            | 36.690             | 0.099         | 1.512      | 0.248        | 0.210         | 1.452       | 4.104          | 0.467        | 1.154        | 1.569         | 4.521       | 4.785        |
| 39            | 15.283             | 0.045         | 0.806      | 0.106        | 0.123         | 0.705       | 1.966          | 0.215        | 0.728        | 1.011         | 2.143       | 2.370        |
| 42            | 6.788              | 0.014         | 0.332      | 0.065        | 0.081         | 0.270       | 0.668          | 0.085        | 0.500        | 0.686         | 0.653       | 0.948        |
| 45            | 4.996              | 0.013         | 0.194      | 0.048        | 0.071         | 0.160       | 0.420          | 0.048        | 0.468        | 0.572         | 0.376       | 0.685        |
| 48            | 3.257              | 0.016         | 0.109      | 0.036        | 0.075         | 0.100       | 0.269          | 0.034        | 0.489        | 0.542         | 0.218       | 0.584        |
| 52            | 2.940              | 0.018         | 0.053      | 0.019        | 0.078         | 0.056       | 0.226          | 0.027        | 0.601        | 0.638         | 0.141       | 0.653        |
| 56            | 1.979              | 0.020         | 0.039      | 0.022        | 0.097         | 0.051       | 0.184          | 0.024        | 0.886        | 0.900         | 0.151       | 0.913        |
| 60            | 0.516              | 0.030         | 0.129      | 0.039        | 0.169         | 0.062       | 0.127          | 0.020        | 1.276        | 1.292         | 0.159       | 1.302        |
| 64            | -0.432             | 0.076         | 0.359      | 0.150        | 0.291         | 0.277       | 0.421          | 0.034        | 1.677        | 1.718         | 0.598       | 1.819        |
| 68            | -0.514             | 0.080         | 0.390      | 0.192        | 0.292         | 0.351       | 0.558          | 0.039        | 1.617        | 1.663         | 0.753       | 1.825        |

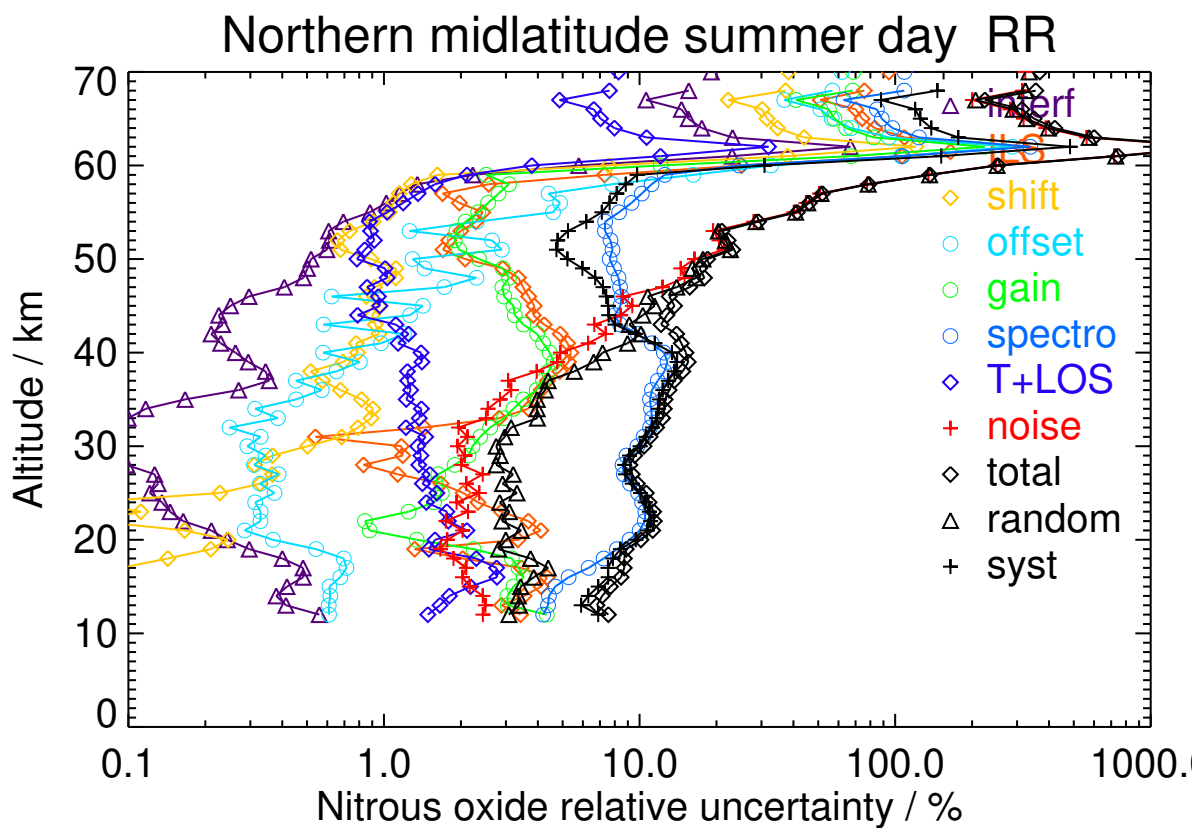

**Figure S183.** V8R\_N2O\_261 Northern midlatitude summer day

**Table S184.** Nitrous oxide error budget for Northern midlatitude summer night. All uncertainties are  $1\sigma$ .

| altitude (km) | mean target (ppbv) | interf (ppbv) | ILS (ppbv) | shift (ppbv) | offset (ppbv) | gain (ppbv) | spectro (ppbv) | T+LOS (ppbv) | noise (ppbv) | random (ppbv) | syst (ppbv) | total (ppbv) |
|---------------|--------------------|---------------|------------|--------------|---------------|-------------|----------------|--------------|--------------|---------------|-------------|--------------|
| 12            | 338.947            | 2.051         | 6.172      | 0.239        | 2.343         | 12.147      | 14.486         | 6.551        | 10.112       | 13.593        | 19.122      | 23.461       |
| 15            | 334.506            | 1.384         | 9.010      | 0.151        | 1.842         | 8.372       | 13.965         | 6.371        | 7.535        | 12.538        | 17.082      | 21.189       |
| 18            | 302.349            | 1.003         | 4.984      | 0.506        | 1.006         | 4.845       | 20.468         | 4.564        | 5.029        | 9.744         | 20.511      | 22.708       |
| 21            | 242.216            | 0.534         | 11.419     | 0.392        | 0.881         | 2.024       | 24.831         | 5.009        | 4.638        | 7.921         | 27.133      | 28.265       |
| 24            | 181.169            | 0.232         | 4.471      | 0.146        | 0.599         | 2.793       | 18.960         | 2.900        | 3.594        | 5.360         | 19.502      | 20.225       |
| 27            | 139.638            | 0.178         | 1.560      | 0.524        | 0.517         | 2.254       | 12.872         | 2.190        | 3.208        | 4.446         | 13.004      | 13.743       |
| 30            | 110.027            | 0.117         | 1.269      | 0.670        | 0.363         | 2.170       | 10.803         | 1.667        | 2.342        | 3.407         | 10.967      | 11.484       |
| 33            | 65.923             | 0.085         | 1.640      | 0.642        | 0.273         | 1.863       | 6.737          | 0.937        | 1.704        | 2.859         | 6.903       | 7.471        |
| 36            | 35.912             | 0.101         | 1.491      | 0.321        | 0.198         | 1.243       | 3.928          | 0.483        | 1.147        | 1.795         | 4.205       | 4.572        |
| 39            | 14.289             | 0.051         | 0.687      | 0.095        | 0.120         | 0.638       | 1.649          | 0.204        | 0.727        | 0.959         | 1.810       | 2.048        |
| 42            | 8.017              | 0.016         | 0.389      | 0.059        | 0.084         | 0.338       | 0.748          | 0.082        | 0.515        | 0.810         | 0.673       | 1.053        |
| 45            | 5.668              | 0.013         | 0.195      | 0.047        | 0.073         | 0.178       | 0.431          | 0.047        | 0.478        | 0.585         | 0.389       | 0.703        |
| 48            | 4.865              | 0.017         | 0.104      | 0.038        | 0.077         | 0.124       | 0.328          | 0.039        | 0.483        | 0.558         | 0.256       | 0.614        |
| 52            | 3.606              | 0.019         | 0.092      | 0.027        | 0.083         | 0.084       | 0.299          | 0.034        | 0.622        | 0.671         | 0.223       | 0.708        |
| 56            | 1.605              | 0.019         | 0.044      | 0.020        | 0.103         | 0.046       | 0.189          | 0.026        | 0.912        | 0.929         | 0.138       | 0.940        |
| 60            | 1.041              | 0.026         | 0.109      | 0.023        | 0.168         | 0.033       | 0.115          | 0.020        | 1.259        | 1.275         | 0.121       | 1.281        |
| 64            | 0.632              | 0.069         | 0.334      | 0.108        | 0.288         | 0.177       | 0.306          | 0.030        | 1.659        | 1.697         | 0.459       | 1.758        |
| 68            | 0.031              | 0.080         | 0.372      | 0.138        | 0.298         | 0.217       | 0.384          | 0.028        | 1.616        | 1.658         | 0.558       | 1.749        |

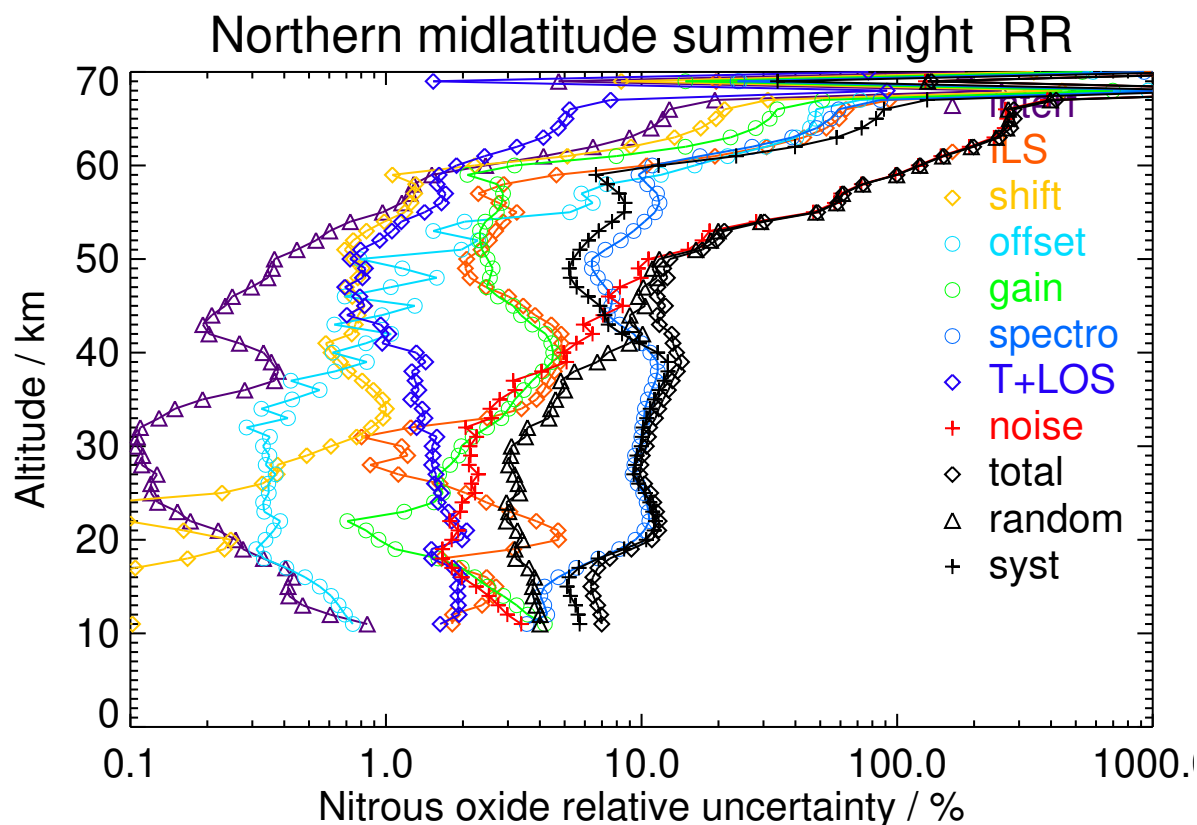

**Figure S184.** V8R\_N2O\_261 Northern midlatitude summer night

**Table S185.** Nitrous oxide error budget for Northern midlatitude autumn day. All uncertainties are  $1\sigma$ .

| altitude (km) | mean target (ppbv) | interf (ppbv) | ILS (ppbv) | shift (ppbv) | offset (ppbv) | gain (ppbv) | spectro (ppbv) | T+LOS (ppbv) | noise (ppbv) | random (ppbv) | syst (ppbv) | total (ppbv) |
|---------------|--------------------|---------------|------------|--------------|---------------|-------------|----------------|--------------|--------------|---------------|-------------|--------------|
| 12            | 344.158            | 1.574         | 8.281      | 0.154        | 2.119         | 14.636      | 13.921         | 4.762        | 7.906        | 9.996         | 21.653      | 23.849       |
| 15            | 327.134            | 1.237         | 11.649     | 0.147        | 2.262         | 11.293      | 16.102         | 7.628        | 8.388        | 13.232        | 21.969      | 25.647       |
| 18            | 310.971            | 0.778         | 4.328      | 0.455        | 1.520         | 10.296      | 23.201         | 5.717        | 4.908        | 10.278        | 24.846      | 26.888       |
| 21            | 238.969            | 0.407         | 12.142     | 0.521        | 0.918         | 2.618       | 26.319         | 4.673        | 4.565        | 7.984         | 28.761      | 29.848       |
| 24            | 180.451            | 0.239         | 6.245      | 0.306        | 0.811         | 1.951       | 19.489         | 2.888        | 3.563        | 6.077         | 20.188      | 21.083       |
| 27            | 137.469            | 0.158         | 2.947      | 0.515        | 0.627         | 1.991       | 14.675         | 2.316        | 3.665        | 5.186         | 14.852      | 15.732       |
| 30            | 104.144            | 0.095         | 0.924      | 0.521        | 0.352         | 1.957       | 10.650         | 1.588        | 2.500        | 3.717         | 10.652      | 11.282       |
| 33            | 73.126             | 0.079         | 0.977      | 0.641        | 0.317         | 1.788       | 7.327          | 0.896        | 2.066        | 3.353         | 7.224       | 7.964        |
| 36            | 48.746             | 0.097         | 1.399      | 0.411        | 0.264         | 1.654       | 4.752          | 0.517        | 1.511        | 2.323         | 4.967       | 5.484        |
| 39            | 28.920             | 0.086         | 1.198      | 0.171        | 0.203         | 1.358       | 2.781          | 0.297        | 1.104        | 1.728         | 3.068       | 3.521        |
| 42            | 19.480             | 0.037         | 0.934      | 0.105        | 0.143         | 0.903       | 1.852          | 0.190        | 0.861        | 1.374         | 2.010       | 2.435        |
| 45            | 8.943              | 0.017         | 0.494      | 0.083        | 0.098         | 0.304       | 1.016          | 0.105        | 0.696        | 0.861         | 1.068       | 1.371        |
| 48            | 4.770              | 0.017         | 0.178      | 0.034        | 0.094         | 0.085       | 0.408          | 0.052        | 0.650        | 0.707         | 0.375       | 0.800        |
| 52            | 3.057              | 0.020         | 0.070      | 0.019        | 0.098         | 0.042       | 0.227          | 0.030        | 0.793        | 0.809         | 0.210       | 0.836        |
| 56            | 1.246              | 0.020         | 0.030      | 0.017        | 0.115         | 0.029       | 0.138          | 0.020        | 1.079        | 1.089         | 0.117       | 1.096        |
| 60            | 0.534              | 0.025         | 0.105      | 0.027        | 0.196         | 0.050       | 0.098          | 0.018        | 1.424        | 1.440         | 0.129       | 1.446        |
| 64            | -0.075             | 0.048         | 0.217      | 0.079        | 0.314         | 0.165       | 0.232          | 0.028        | 1.760        | 1.796         | 0.328       | 1.826        |
| 68            | -0.509             | 0.045         | 0.194      | 0.075        | 0.325         | 0.173       | 0.222          | 0.025        | 1.706        | 1.744         | 0.313       | 1.772        |

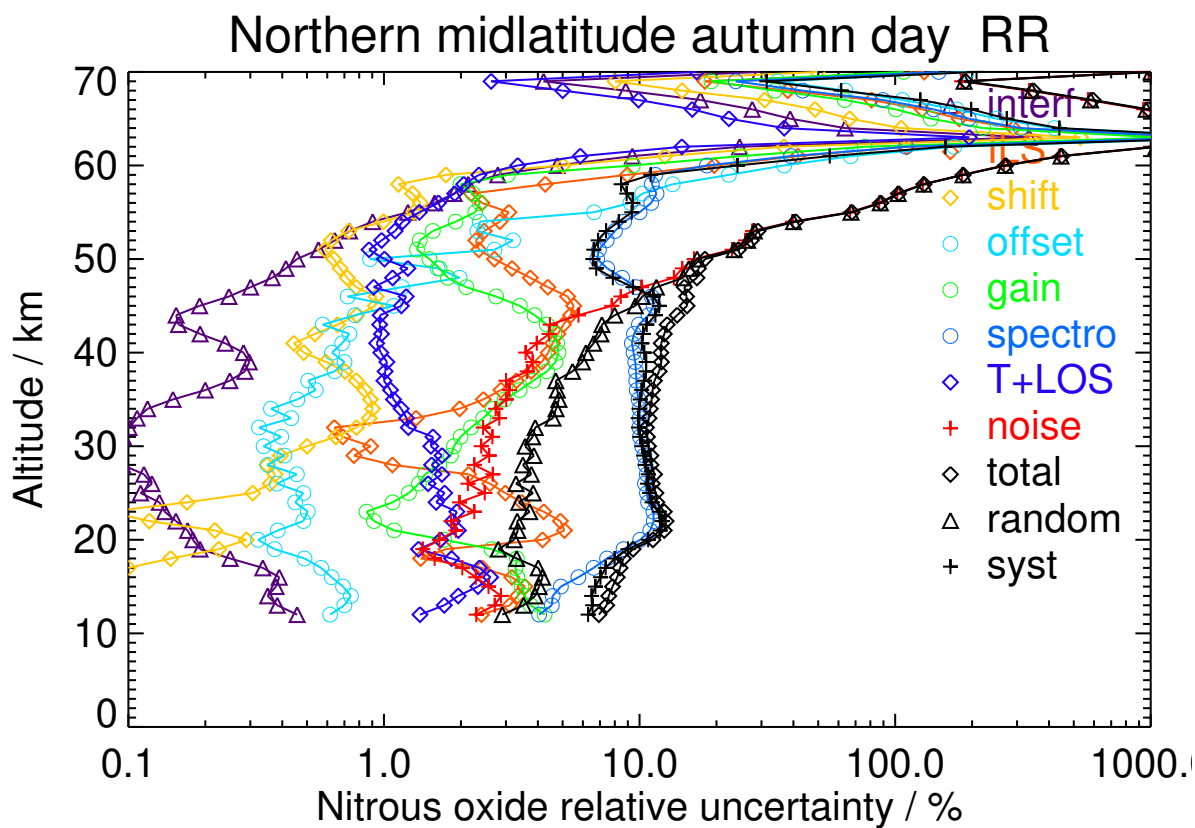

**Figure S185.** V8R\_N2O\_261 Northern midlatitude autumn day

**Table S186.** Nitrous oxide error budget for Northern midlatitude autumn night. All uncertainties are  $1\sigma$ .

| altitude (km) | mean target (ppbv) | interf (ppbv) | ILS (ppbv) | shift (ppbv) | offset (ppbv) | gain (ppbv) | spectro (ppbv) | T+LOS (ppbv) | noise (ppbv) | random (ppbv) | syst (ppbv) | total (ppbv) |
|---------------|--------------------|---------------|------------|--------------|---------------|-------------|----------------|--------------|--------------|---------------|-------------|--------------|
| 12            | 324.141            | 1.252         | 12.150     | 0.086        | 2.559         | 14.851      | 14.028         | 5.902        | 9.476        | 11.862        | 23.601      | 26.414       |
| 15            | 328.441            | 1.083         | 10.240     | 0.136        | 2.056         | 10.552      | 15.242         | 7.332        | 7.489        | 12.447        | 20.220      | 23.744       |
| 18            | 305.189            | 0.691         | 3.935      | 0.489        | 1.383         | 10.192      | 21.057         | 4.944        | 4.467        | 9.762         | 22.682      | 24.693       |
| 21            | 232.770            | 0.391         | 8.725      | 0.439        | 0.922         | 7.039       | 24.555         | 4.134        | 4.355        | 10.120        | 25.758      | 27.675       |
| 24            | 171.535            | 0.216         | 5.832      | 0.338        | 0.714         | 2.397       | 18.822         | 2.783        | 3.628        | 6.914         | 19.178      | 20.386       |
| 27            | 132.679            | 0.149         | 3.078      | 0.494        | 0.572         | 2.266       | 14.269         | 2.193        | 3.466        | 5.401         | 14.369      | 15.350       |
| 30            | 95.384             | 0.090         | 1.082      | 0.512        | 0.359         | 2.040       | 10.767         | 1.557        | 2.436        | 4.281         | 10.568      | 11.402       |
| 33            | 63.857             | 0.086         | 0.962      | 0.610        | 0.313         | 1.647       | 7.117          | 0.895        | 1.958        | 3.786         | 6.713       | 7.708        |
| 36            | 38.945             | 0.087         | 1.161      | 0.410        | 0.245         | 1.452       | 4.386          | 0.466        | 1.380        | 2.778         | 4.163       | 5.005        |
| 39            | 23.661             | 0.071         | 1.114      | 0.158        | 0.180         | 1.215       | 2.767          | 0.257        | 0.975        | 2.220         | 2.553       | 3.384        |
| 42            | 14.068             | 0.030         | 0.816      | 0.081        | 0.121         | 0.727       | 1.596          | 0.142        | 0.743        | 1.409         | 1.534       | 2.082        |
| 45            | 8.363              | 0.015         | 0.397      | 0.065        | 0.092         | 0.263       | 0.782          | 0.078        | 0.638        | 0.811         | 0.778       | 1.124        |
| 48            | 4.694              | 0.018         | 0.183      | 0.031        | 0.089         | 0.088       | 0.402          | 0.045        | 0.602        | 0.639         | 0.410       | 0.759        |
| 52            | 2.650              | 0.020         | 0.064      | 0.015        | 0.096         | 0.037       | 0.175          | 0.024        | 0.751        | 0.763         | 0.172       | 0.782        |
| 56            | 1.664              | 0.018         | 0.035      | 0.016        | 0.114         | 0.034       | 0.130          | 0.019        | 1.044        | 1.053         | 0.120       | 1.060        |
| 60            | 0.450              | 0.021         | 0.070      | 0.012        | 0.181         | 0.029       | 0.075          | 0.016        | 1.359        | 1.373         | 0.082       | 1.375        |
| 64            | -0.088             | 0.038         | 0.156      | 0.045        | 0.305         | 0.131       | 0.147          | 0.022        | 1.713        | 1.745         | 0.226       | 1.759        |
| 68            | -0.225             | 0.043         | 0.184      | 0.057        | 0.321         | 0.152       | 0.176          | 0.024        | 1.686        | 1.723         | 0.269       | 1.744        |

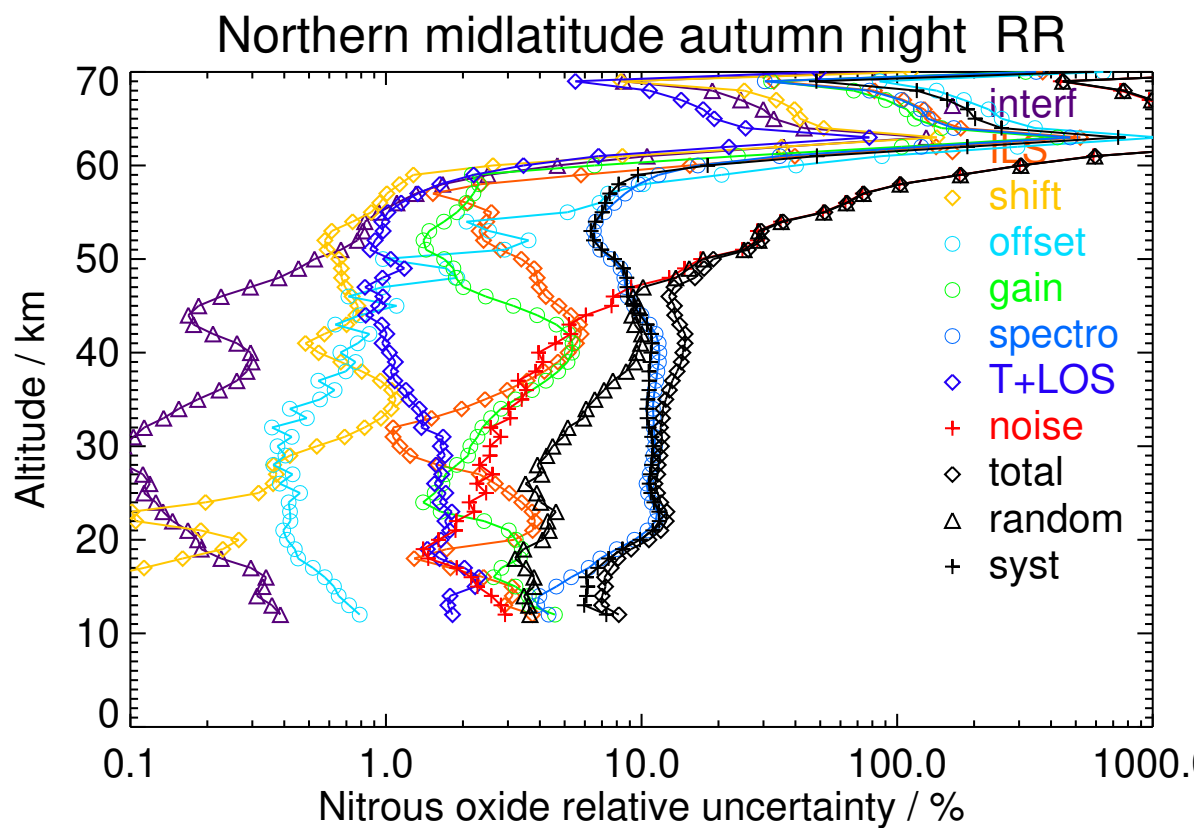

**Figure S186.** V8R\_N2O\_261 Northern midlatitude autumn night

**Table S187.** Nitrous oxide error budget for Tropics day. All uncertainties are  $1\sigma$ .

| altitude<br>(km) | mean target<br>(ppbv) | interf<br>(ppbv) | ILS<br>(ppbv) | shift<br>(ppbv) | offset<br>(ppbv) | gain<br>(ppbv) | spectro<br>(ppbv) | T+LOS<br>(ppbv) | noise<br>(ppbv) | random<br>(ppbv) | syst<br>(ppbv) | total<br>(ppbv) |
|------------------|-----------------------|------------------|---------------|-----------------|------------------|----------------|-------------------|-----------------|-----------------|------------------|----------------|-----------------|
| 12               | 353.458               | 1.315            | 6.576         | 0.096           | 2.105            | 13.988         | 16.897            | 5.919           | 8.292           | 11.428           | 22.445         | 25.187          |
| 15               | 362.230               | 1.681            | 13.356        | 0.334           | 2.449            | 13.530         | 15.428            | 10.277          | 8.500           | 14.844           | 23.789         | 28.040          |
| 18               | 335.895               | 1.389            | 7.650         | 0.263           | 2.417            | 9.007          | 17.257            | 8.407           | 7.741           | 12.630           | 20.405         | 23.998          |
| 21               | 293.336               | 0.812            | 5.961         | 0.260           | 0.856            | 3.875          | 23.099            | 5.919           | 6.087           | 9.401            | 23.860         | 25.645          |
| 24               | 265.355               | 0.214            | 1.429         | 0.262           | 0.669            | 5.486          | 24.488            | 3.347           | 4.229           | 7.153            | 24.704         | 25.719          |
| 27               | 251.759               | 0.170            | 0.894         | 0.292           | 0.652            | 4.401          | 21.022            | 3.179           | 3.922           | 5.929            | 21.283         | 22.094          |
| 30               | 213.112               | 0.112            | 1.523         | 0.651           | 0.536            | 4.470          | 18.214            | 2.713           | 3.017           | 4.809            | 18.657         | 19.267          |
| 33               | 160.327               | 0.135            | 3.240         | 1.254           | 0.416            | 3.712          | 13.850            | 1.699           | 2.256           | 4.541            | 14.326         | 15.028          |
| 36               | 87.582                | 0.131            | 2.747         | 0.928           | 0.252            | 2.515          | 8.630             | 0.974           | 1.480           | 3.101            | 9.100          | 9.614           |
| 39               | 39.352                | 0.110            | 1.377         | 0.339           | 0.185            | 1.623          | 4.082             | 0.425           | 0.963           | 1.893            | 4.345          | 4.740           |
| 42               | 19.120                | 0.045            | 0.709         | 0.139           | 0.120            | 0.930          | 2.163             | 0.210           | 0.662           | 1.504            | 2.075          | 2.562           |
| 45               | 6.858                 | 0.018            | 0.182         | 0.081           | 0.069            | 0.226          | 0.762             | 0.093           | 0.496           | 0.629            | 0.732          | 0.965           |
| 48               | 4.154                 | 0.016            | 0.082         | 0.016           | 0.061            | 0.097          | 0.294             | 0.045           | 0.492           | 0.524            | 0.277          | 0.593           |
| 52               | 1.190                 | 0.016            | 0.045         | 0.014           | 0.047            | 0.028          | 0.171             | 0.026           | 0.561           | 0.572            | 0.152          | 0.592           |
| 56               | 0.355                 | 0.018            | 0.061         | 0.028           | 0.071            | 0.038          | 0.081             | 0.010           | 0.774           | 0.780            | 0.090          | 0.786           |
| 60               | -0.043                | 0.024            | 0.110         | 0.034           | 0.154            | 0.071          | 0.112             | 0.013           | 1.119           | 1.132            | 0.157          | 1.143           |
| 64               | -0.579                | 0.070            | 0.450         | 0.184           | 0.287            | 0.323          | 0.524             | 0.044           | 1.609           | 1.662            | 0.729          | 1.814           |
| 68               | -0.801                | 0.082            | 0.558         | 0.225           | 0.309            | 0.396          | 0.643             | 0.056           | 1.622           | 1.699            | 0.885          | 1.915           |

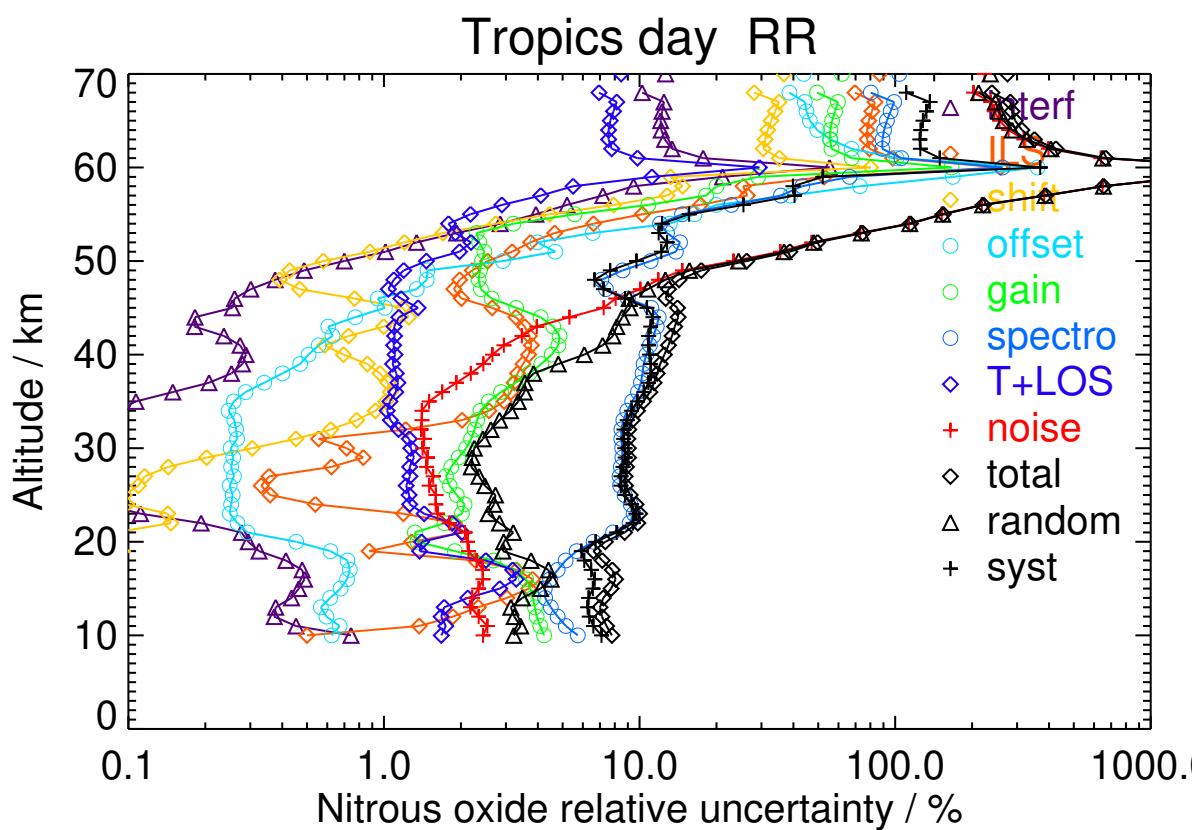

**Figure S187.** V8R\_N2O\_261 Tropics day

**Table S188.** Nitrous oxide error budget for Tropics night. All uncertainties are  $1\sigma$ .

| altitude (km) | mean target (ppbv) | interf (ppbv) | ILS (ppbv) | shift (ppbv) | offset (ppbv) | gain (ppbv) | spectro (ppbv) | T+LOS (ppbv) | noise (ppbv) | random (ppbv) | syst (ppbv) | total (ppbv) |
|---------------|--------------------|---------------|------------|--------------|---------------|-------------|----------------|--------------|--------------|---------------|-------------|--------------|
| 12            | 355.453            | 1.373         | 6.087      | 0.081        | 2.084         | 14.191      | 17.464         | 6.265        | 8.523        | 11.652        | 22.930      | 25.721       |
| 15            | 364.118            | 1.791         | 12.155     | 0.295        | 2.452         | 12.804      | 15.626         | 11.566       | 8.891        | 15.755        | 23.017      | 27.893       |
| 18            | 338.866            | 1.273         | 6.921      | 0.303        | 2.307         | 8.029       | 17.166         | 8.814        | 7.848        | 12.662        | 19.825      | 23.523       |
| 21            | 292.229            | 0.832         | 6.413      | 0.378        | 0.875         | 3.618       | 24.939         | 6.357        | 6.281        | 9.711         | 25.755      | 27.525       |
| 24            | 267.044            | 0.182         | 1.236      | 0.160        | 0.577         | 6.090       | 22.659         | 3.587        | 4.241        | 6.855         | 23.158      | 24.152       |
| 27            | 246.541            | 0.150         | 0.973      | 0.253        | 0.664         | 4.539       | 21.551         | 3.370        | 3.844        | 5.985         | 21.836      | 22.642       |
| 30            | 213.258            | 0.096         | 2.018      | 0.576        | 0.515         | 4.193       | 17.883         | 2.948        | 3.027        | 4.945         | 18.315      | 18.971       |
| 33            | 162.501            | 0.113         | 3.225      | 1.091        | 0.403         | 3.760       | 14.245         | 1.835        | 2.270        | 4.243         | 14.810      | 15.406       |
| 36            | 87.420             | 0.123         | 3.354      | 0.925        | 0.252         | 2.511       | 8.661          | 1.022        | 1.511        | 3.127         | 9.330       | 9.840        |
| 39            | 41.114             | 0.111         | 1.654      | 0.287        | 0.190         | 1.667       | 4.172          | 0.466        | 1.001        | 1.785         | 4.592       | 4.927        |
| 42            | 18.357             | 0.038         | 0.716      | 0.159        | 0.116         | 0.911       | 2.179          | 0.219        | 0.673        | 1.379         | 2.175       | 2.575        |
| 45            | 6.435              | 0.015         | 0.123      | 0.055        | 0.074         | 0.156       | 0.712          | 0.090        | 0.507        | 0.618         | 0.662       | 0.905        |
| 48            | 3.451              | 0.015         | 0.068      | 0.017        | 0.069         | 0.080       | 0.251          | 0.043        | 0.509        | 0.525         | 0.255       | 0.584        |
| 52            | 1.116              | 0.016         | 0.033      | 0.011        | 0.053         | 0.022       | 0.136          | 0.023        | 0.561        | 0.571         | 0.113       | 0.582        |
| 56            | 0.382              | 0.019         | 0.053      | 0.026        | 0.072         | 0.035       | 0.082          | 0.011        | 0.772        | 0.778         | 0.090       | 0.783        |
| 60            | -0.325             | 0.023         | 0.110      | 0.034        | 0.152         | 0.070       | 0.111          | 0.012        | 1.127        | 1.140         | 0.157       | 1.151        |
| 64            | -0.776             | 0.067         | 0.446      | 0.184        | 0.284         | 0.325       | 0.526          | 0.044        | 1.615        | 1.662         | 0.741       | 1.820        |
| 68            | -0.997             | 0.085         | 0.610      | 0.258        | 0.304         | 0.435       | 0.723          | 0.061        | 1.624        | 1.694         | 1.012       | 1.973        |

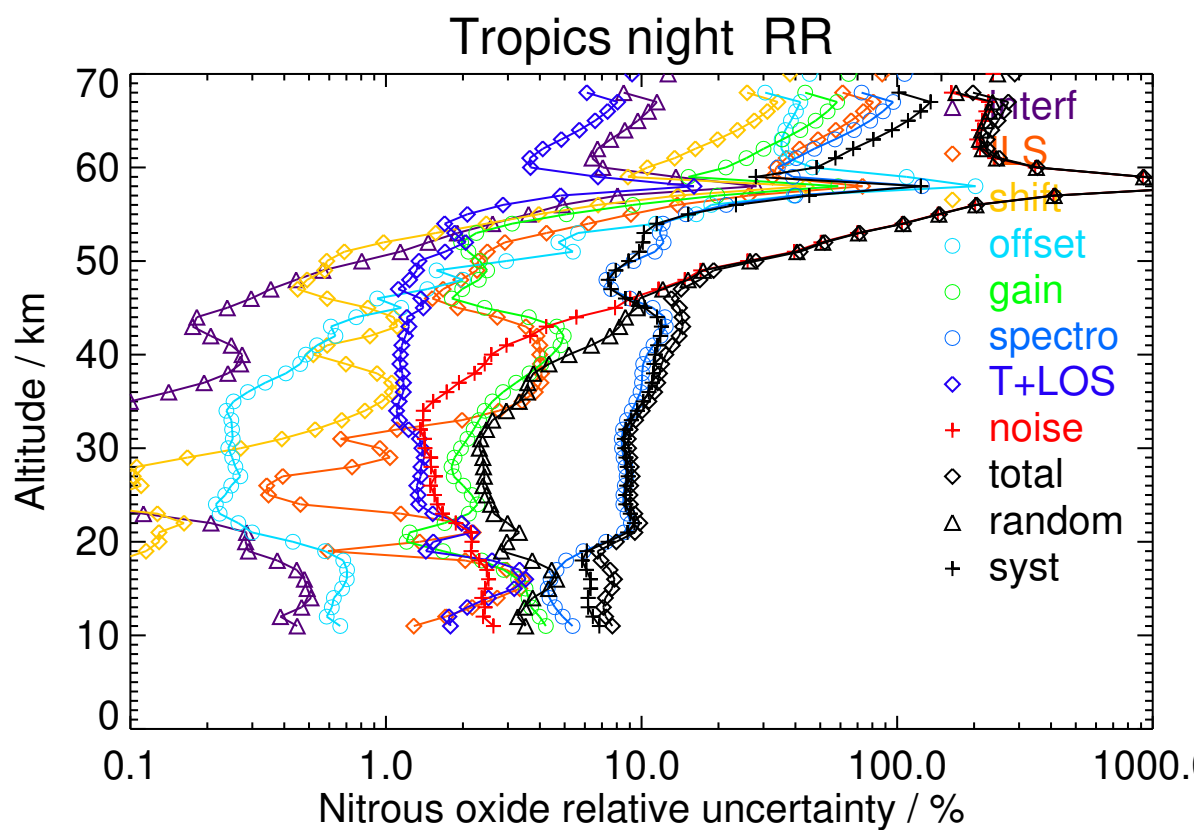

**Figure S188.** V8R\_N2O\_261 Tropics night



**Table S189.** Nitrous oxide error budget for Southern midlatitude winter day. All uncertainties are  $1\sigma$ .

| altitude<br>(km) | mean target<br>(ppbv) | interf<br>(ppbv) | ILS<br>(ppbv) | shift<br>(ppbv) | offset<br>(ppbv) | gain<br>(ppbv) | spectro<br>(ppbv) | T+LOS<br>(ppbv) | noise<br>(ppbv) | random<br>(ppbv) | syst<br>(ppbv) | total<br>(ppbv) |
|------------------|-----------------------|------------------|---------------|-----------------|------------------|----------------|-------------------|-----------------|-----------------|------------------|----------------|-----------------|
| 9                | 342.298               | 4.523            | 3.460         | 0.381           | 2.959            | 12.739         | 15.390            | 6.545           | 12.340          | 15.332           | 20.013         | 25.211          |
| 12               | 314.411               | 1.162            | 5.076         | 0.248           | 1.484            | 10.409         | 13.236            | 4.091           | 7.058           | 9.356            | 17.086         | 19.480          |
| 15               | 298.225               | 0.843            | 5.271         | 0.303           | 1.395            | 8.953          | 16.663            | 5.198           | 5.347           | 9.166            | 18.972         | 21.071          |
| 18               | 265.215               | 0.320            | 4.914         | 0.543           | 1.081            | 14.052         | 23.286            | 5.105           | 4.513           | 10.503           | 26.487         | 28.493          |
| 21               | 209.178               | 0.250            | 3.819         | 0.175           | 0.917            | 10.320         | 23.087            | 3.325           | 4.251           | 7.792            | 24.969         | 26.156          |
| 24               | 159.128               | 0.176            | 2.754         | 0.332           | 0.826            | 5.899          | 19.135            | 2.811           | 4.476           | 6.540            | 19.862         | 20.911          |
| 27               | 108.601               | 0.115            | 1.358         | 0.299           | 0.568            | 2.858          | 14.064            | 2.182           | 3.744           | 6.132            | 13.763         | 15.067          |
| 30               | 77.165                | 0.064            | 0.632         | 0.395           | 0.419            | 1.911          | 10.676            | 1.536           | 3.137           | 6.855            | 9.142          | 11.427          |
| 33               | 56.813                | 0.071            | 1.808         | 0.295           | 0.331            | 1.674          | 8.444             | 0.947           | 2.456           | 5.847            | 7.094          | 9.193           |
| 36               | 30.438                | 0.071            | 1.639         | 0.097           | 0.266            | 1.378          | 5.114             | 0.543           | 1.748           | 3.564            | 4.634          | 5.846           |
| 39               | 10.750                | 0.031            | 0.692         | 0.049           | 0.138            | 0.584          | 2.218             | 0.228           | 1.012           | 1.717            | 1.972          | 2.615           |
| 42               | 2.084                 | 0.012            | 0.154         | 0.017           | 0.083            | 0.102          | 0.601             | 0.064           | 0.674           | 0.831            | 0.413          | 0.928           |
| 45               | 0.912                 | 0.011            | 0.035         | 0.008           | 0.080            | 0.037          | 0.147             | 0.018           | 0.658           | 0.678            | 0.065          | 0.681           |
| 48               | 0.450                 | 0.016            | 0.021         | 0.005           | 0.088            | 0.013          | 0.075             | 0.010           | 0.679           | 0.687            | 0.050          | 0.689           |
| 52               | -0.002                | 0.019            | 0.022         | 0.007           | 0.098            | 0.013          | 0.046             | 0.008           | 0.848           | 0.855            | 0.021          | 0.856           |
| 56               | 0.424                 | 0.016            | 0.039         | 0.013           | 0.115            | 0.037          | 0.061             | 0.012           | 1.130           | 1.138            | 0.044          | 1.139           |
| 60               | 0.185                 | 0.013            | 0.043         | 0.011           | 0.183            | 0.027          | 0.050             | 0.012           | 1.369           | 1.383            | 0.030          | 1.383           |
| 64               | -0.258                | 0.016            | 0.064         | 0.013           | 0.306            | 0.068          | 0.069             | 0.016           | 1.697           | 1.728            | 0.056          | 1.729           |
| 68               | -0.269                | 0.017            | 0.071         | 0.013           | 0.326            | 0.070          | 0.072             | 0.017           | 1.672           | 1.706            | 0.068          | 1.708           |

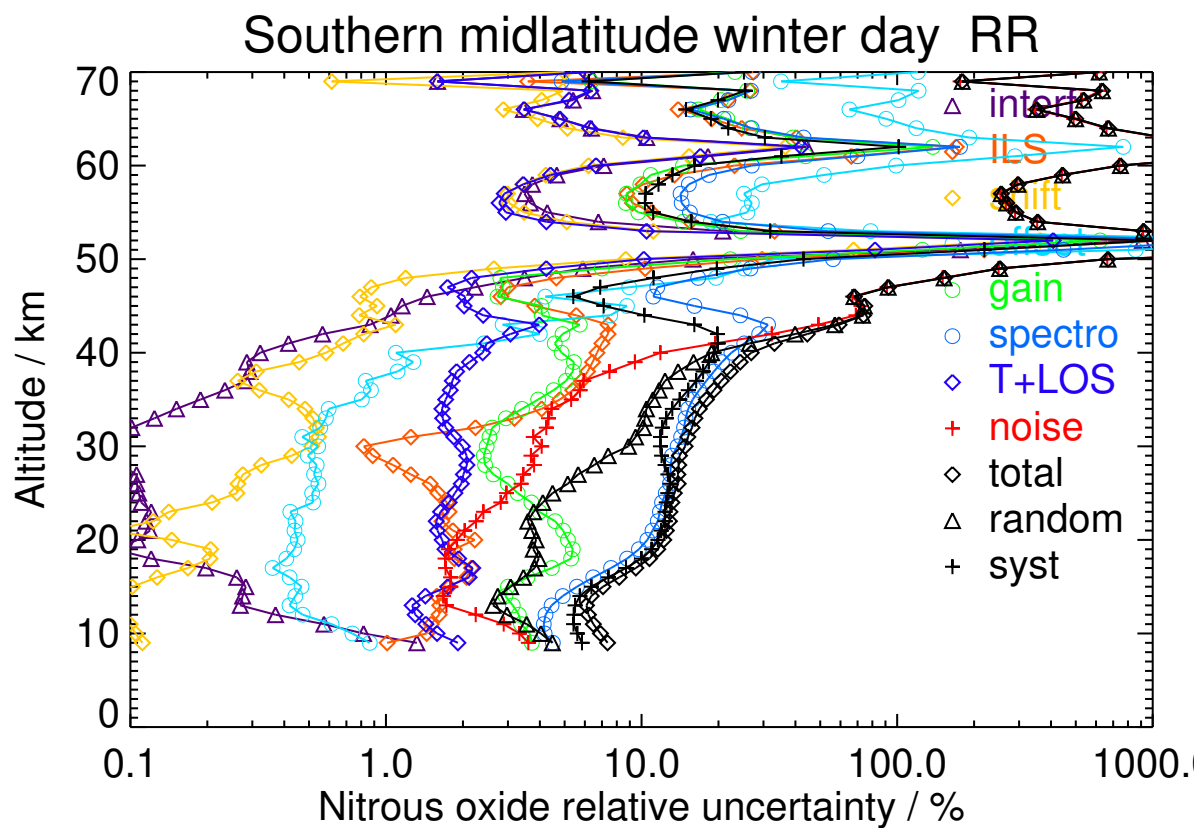

**Figure S189.** V8R\_N2O\_261 Southern midlatitude winter day



**Table S190.** Nitrous oxide error budget for Southern midlatitude winter night. All uncertainties are  $1\sigma$ .

| altitude<br>(km) | mean target<br>(ppbv) | interf<br>(ppbv) | ILS<br>(ppbv) | shift<br>(ppbv) | offset<br>(ppbv) | gain<br>(ppbv) | spectro<br>(ppbv) | T+LOS<br>(ppbv) | noise<br>(ppbv) | random<br>(ppbv) | syst<br>(ppbv) | total<br>(ppbv) |
|------------------|-----------------------|------------------|---------------|-----------------|------------------|----------------|-------------------|-----------------|-----------------|------------------|----------------|-----------------|
| 9                | 310.415               | 3.303            | 2.015         | 0.374           | 2.439            | 9.117          | 12.569            | 4.865           | 10.667          | 12.917           | 15.257         | 19.990          |
| 12               | 311.921               | 1.048            | 4.699         | 0.309           | 1.200            | 10.238         | 12.365            | 3.201           | 5.407           | 8.327            | 15.892         | 17.942          |
| 15               | 296.479               | 0.907            | 5.923         | 0.233           | 1.384            | 10.464         | 15.318            | 4.712           | 5.074           | 9.535            | 18.412         | 20.735          |
| 18               | 264.377               | 0.318            | 8.839         | 0.288           | 1.666            | 19.618         | 17.085            | 5.854           | 4.457           | 11.785           | 25.944         | 28.495          |
| 21               | 206.019               | 0.241            | 2.488         | 0.255           | 1.250            | 13.494         | 18.581            | 3.558           | 4.230           | 8.916            | 22.052         | 23.786          |
| 24               | 151.061               | 0.161            | 2.441         | 0.308           | 0.746            | 5.817          | 16.129            | 2.586           | 3.911           | 6.659            | 16.681         | 17.961          |
| 27               | 105.232               | 0.101            | 1.852         | 0.272           | 0.637            | 2.580          | 13.412            | 2.281           | 3.920           | 6.235            | 13.120         | 14.526          |
| 30               | 63.929                | 0.065            | 0.664         | 0.308           | 0.359            | 1.589          | 8.899             | 1.514           | 2.751           | 5.068            | 8.158          | 9.605           |
| 33               | 45.397                | 0.071            | 0.963         | 0.331           | 0.291            | 0.873          | 6.003             | 0.795           | 2.328           | 4.659            | 4.719          | 6.632           |
| 36               | 26.620                | 0.073            | 1.029         | 0.139           | 0.267            | 1.345          | 3.253             | 0.434           | 1.570           | 2.591            | 3.080          | 4.025           |
| 39               | 11.314                | 0.028            | 0.540         | 0.043           | 0.143            | 0.655          | 1.634             | 0.202           | 0.948           | 1.391            | 1.554          | 2.086           |
| 42               | 2.903                 | 0.010            | 0.150         | 0.017           | 0.090            | 0.135          | 0.570             | 0.068           | 0.684           | 0.769            | 0.505          | 0.920           |
| 45               | 0.580                 | 0.012            | 0.028         | 0.005           | 0.086            | 0.021          | 0.147             | 0.018           | 0.698           | 0.716            | 0.069          | 0.720           |
| 48               | 0.342                 | 0.016            | 0.012         | 0.005           | 0.082            | 0.013          | 0.052             | 0.008           | 0.723           | 0.729            | 0.024          | 0.730           |
| 52               | 0.381                 | 0.019            | 0.019         | 0.007           | 0.100            | 0.019          | 0.046             | 0.009           | 0.953           | 0.960            | 0.027          | 0.960           |
| 56               | 0.433                 | 0.016            | 0.019         | 0.008           | 0.112            | 0.035          | 0.040             | 0.012           | 1.167           | 1.174            | 0.034          | 1.174           |
| 60               | -0.163                | 0.016            | 0.041         | 0.008           | 0.189            | 0.030          | 0.040             | 0.012           | 1.367           | 1.381            | 0.023          | 1.381           |
| 64               | -0.774                | 0.021            | 0.060         | 0.017           | 0.309            | 0.074          | 0.060             | 0.017           | 1.705           | 1.735            | 0.069          | 1.737           |
| 68               | -0.835                | 0.018            | 0.042         | 0.010           | 0.331            | 0.091          | 0.041             | 0.019           | 1.688           | 1.722            | 0.085          | 1.724           |

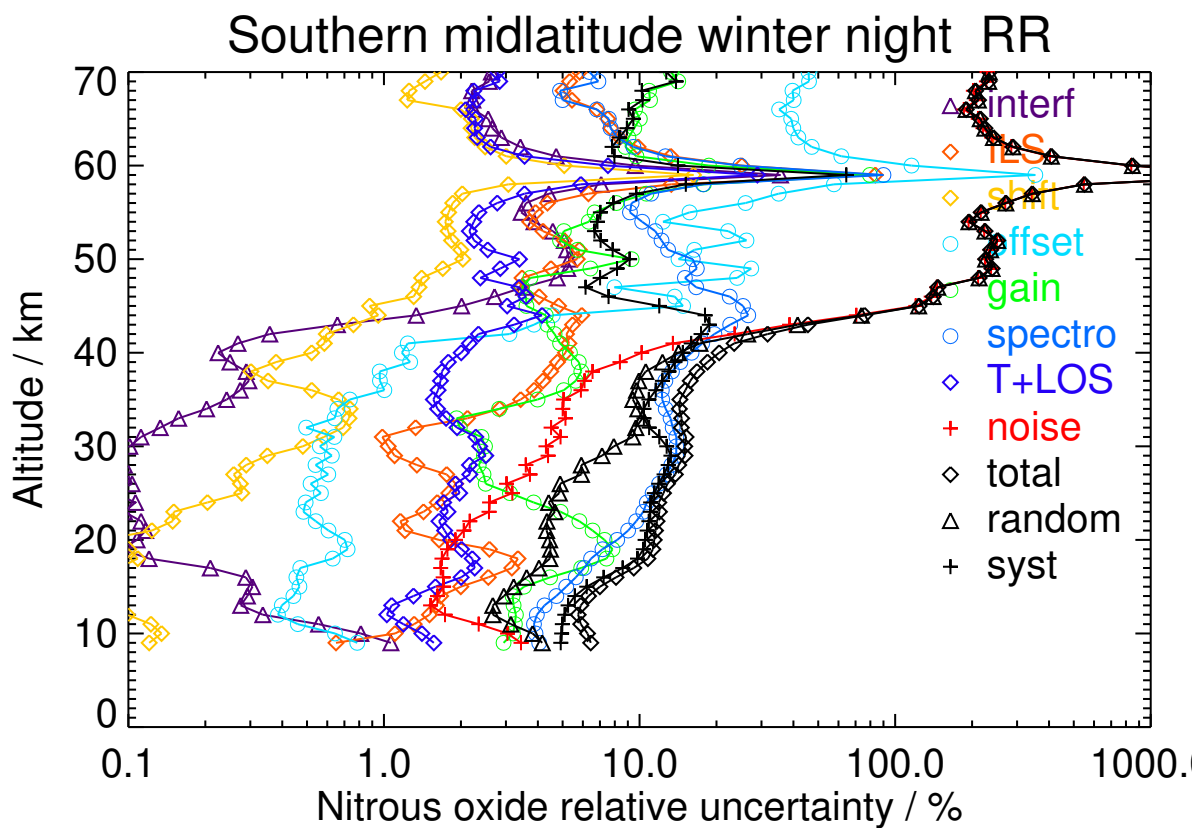

**Figure S190.** V8R\_N2O\_261 Southern midlatitude winter night

**Table S191.** Nitrous oxide error budget for Southern midlatitude spring day. All uncertainties are  $1\sigma$ .

| altitude<br>(km) | mean target<br>(ppbv) | interf<br>(ppbv) | ILS<br>(ppbv) | shift<br>(ppbv) | offset<br>(ppbv) | gain<br>(ppbv) | spectro<br>(ppbv) | T+LOS<br>(ppbv) | noise<br>(ppbv) | random<br>(ppbv) | syst<br>(ppbv) | total<br>(ppbv) |
|------------------|-----------------------|------------------|---------------|-----------------|------------------|----------------|-------------------|-----------------|-----------------|------------------|----------------|-----------------|
| 9                | 309.480               | 5.107            | 4.745         | 0.479           | 2.357            | 9.179          | 15.008            | 5.237           | 11.161          | 15.473           | 16.627         | 22.713          |
| 12               | 304.384               | 1.787            | 6.668         | 0.476           | 1.321            | 8.879          | 14.555            | 3.909           | 5.999           | 11.972           | 15.756         | 19.788          |
| 15               | 284.134               | 1.426            | 7.188         | 0.448           | 1.371            | 7.585          | 18.861            | 5.092           | 5.730           | 13.628           | 18.495         | 22.974          |
| 18               | 230.137               | 0.449            | 9.830         | 0.577           | 1.157            | 11.155         | 22.468            | 4.731           | 4.037           | 16.578           | 22.172         | 27.685          |
| 21               | 170.194               | 0.273            | 7.135         | 0.363           | 0.817            | 7.865          | 19.077            | 3.201           | 3.746           | 14.082           | 17.422         | 22.402          |
| 24               | 171.304               | 0.194            | 3.405         | 0.241           | 0.766            | 4.938          | 14.920            | 2.407           | 3.361           | 8.516            | 14.277         | 16.624          |
| 27               | 167.006               | 0.183            | 1.525         | 0.444           | 0.540            | 2.920          | 14.456            | 2.163           | 3.180           | 5.831            | 14.182         | 15.334          |
| 30               | 140.147               | 0.122            | 1.323         | 0.678           | 0.413            | 3.404          | 13.589            | 1.961           | 2.438           | 5.710            | 13.260         | 14.437          |
| 33               | 88.137                | 0.090            | 2.855         | 0.454           | 0.316            | 3.121          | 10.342            | 1.229           | 1.845           | 3.886            | 10.723         | 11.405          |
| 36               | 29.364                | 0.073            | 1.772         | 0.188           | 0.201            | 1.420          | 4.598             | 0.544           | 1.179           | 2.577            | 4.628          | 5.297           |
| 39               | 11.298                | 0.031            | 0.529         | 0.061           | 0.137            | 0.740          | 1.235             | 0.168           | 0.720           | 1.067            | 1.336          | 1.710           |
| 42               | 6.742                 | 0.014            | 0.214         | 0.046           | 0.092            | 0.376          | 0.671             | 0.077           | 0.540           | 0.694            | 0.681          | 0.973           |
| 45               | 2.639                 | 0.012            | 0.032         | 0.014           | 0.079            | 0.100          | 0.282             | 0.038           | 0.511           | 0.541            | 0.259          | 0.600           |
| 48               | 2.161                 | 0.016            | 0.029         | 0.009           | 0.079            | 0.057          | 0.111             | 0.015           | 0.521           | 0.533            | 0.104          | 0.543           |
| 52               | 1.501                 | 0.019            | 0.031         | 0.010           | 0.093            | 0.039          | 0.119             | 0.015           | 0.708           | 0.718            | 0.107          | 0.726           |
| 56               | 0.547                 | 0.015            | 0.045         | 0.019           | 0.115            | 0.074          | 0.081             | 0.015           | 1.002           | 1.011            | 0.095          | 1.016           |
| 60               | -0.032                | 0.019            | 0.088         | 0.020           | 0.170            | 0.071          | 0.068             | 0.013           | 1.293           | 1.307            | 0.098          | 1.311           |
| 64               | -0.267                | 0.045            | 0.268         | 0.086           | 0.292            | 0.413          | 0.239             | 0.047           | 1.660           | 1.722            | 0.430          | 1.775           |
| 68               | -0.496                | 0.051            | 0.308         | 0.104           | 0.319            | 0.532          | 0.273             | 0.056           | 1.660           | 1.754            | 0.499          | 1.824           |

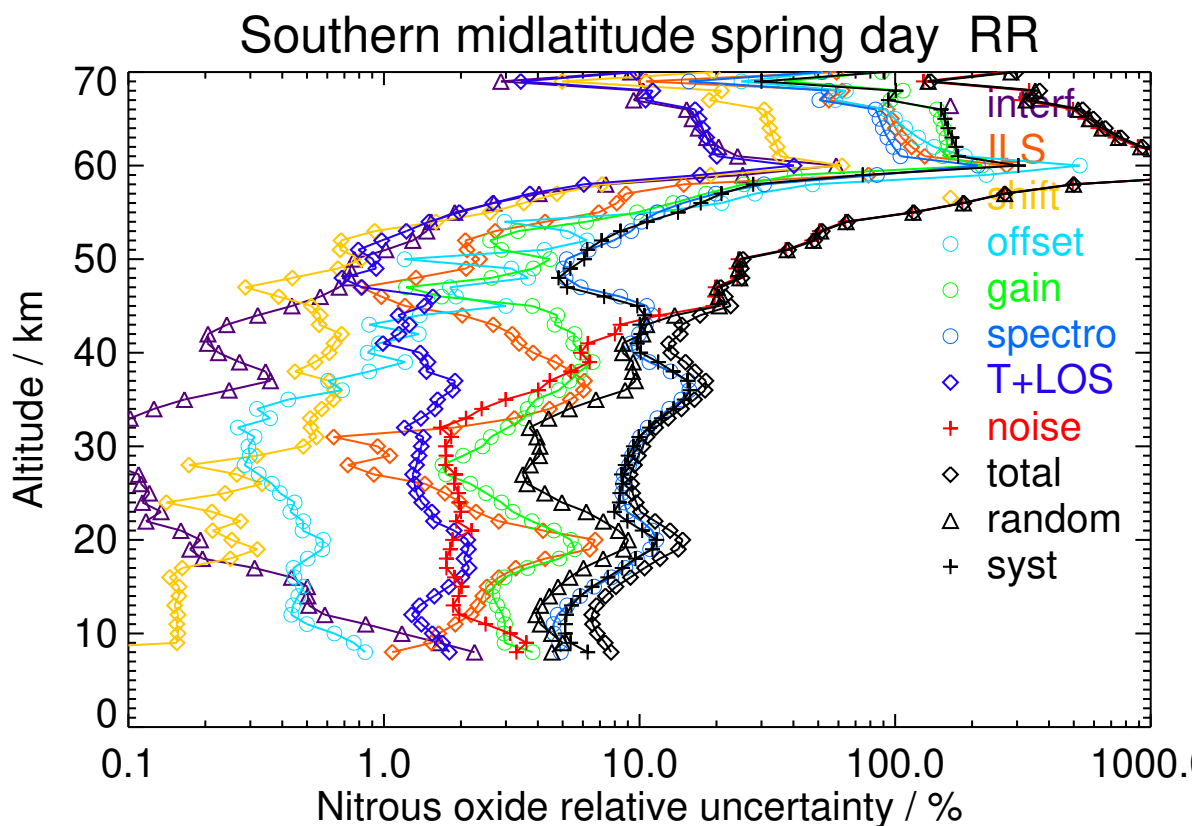

**Figure S191.** V8R\_N2O\_261 Southern midlatitude spring day

**Table S192.** Nitrous oxide error budget for Southern midlatitude spring night. All uncertainties are  $1\sigma$ .

| altitude<br>(km) | mean target<br>(ppbv) | interf<br>(ppbv) | ILS<br>(ppbv) | shift<br>(ppbv) | offset<br>(ppbv) | gain<br>(ppbv) | spectro<br>(ppbv) | T+LOS<br>(ppbv) | noise<br>(ppbv) | random<br>(ppbv) | syst<br>(ppbv) | total<br>(ppbv) |
|------------------|-----------------------|------------------|---------------|-----------------|------------------|----------------|-------------------|-----------------|-----------------|------------------|----------------|-----------------|
| 9                | 314.018               | 3.682            | 6.231         | 0.320           | 2.466            | 11.182         | 11.780            | 5.209           | 10.731          | 14.508           | 15.944         | 21.557          |
| 12               | 316.116               | 1.520            | 9.825         | 0.278           | 1.494            | 12.617         | 12.410            | 4.258           | 6.296           | 10.756           | 18.880         | 21.729          |
| 15               | 289.011               | 1.263            | 11.964        | 0.229           | 1.541            | 11.747         | 14.926            | 5.482           | 5.312           | 12.791           | 20.065         | 23.795          |
| 18               | 228.069               | 0.401            | 10.179        | 0.493           | 1.721            | 19.266         | 21.750            | 5.443           | 4.010           | 19.425           | 24.891         | 31.574          |
| 21               | 145.821               | 0.225            | 6.185         | 0.268           | 0.911            | 9.809          | 17.208            | 2.930           | 3.664           | 13.767           | 16.249         | 21.297          |
| 24               | 137.896               | 0.211            | 3.020         | 0.247           | 0.601            | 3.779          | 14.200            | 1.946           | 3.091           | 10.303           | 11.519         | 15.455          |
| 27               | 134.160               | 0.185            | 2.143         | 0.463           | 0.575            | 2.857          | 12.475            | 1.878           | 3.062           | 8.511            | 10.461         | 13.486          |
| 30               | 132.066               | 0.100            | 1.631         | 0.679           | 0.413            | 4.155          | 13.317            | 1.689           | 2.190           | 5.954            | 13.043         | 14.337          |
| 33               | 74.414                | 0.080            | 2.840         | 0.443           | 0.282            | 2.794          | 10.198            | 1.135           | 1.715           | 4.916            | 10.011         | 11.153          |
| 36               | 23.415                | 0.067            | 1.502         | 0.127           | 0.196            | 1.353          | 3.716             | 0.442           | 1.077           | 2.204            | 3.802          | 4.394           |
| 39               | 9.785                 | 0.026            | 0.503         | 0.070           | 0.116            | 0.522          | 1.089             | 0.140           | 0.639           | 0.907            | 1.156          | 1.469           |
| 42               | 4.513                 | 0.012            | 0.196         | 0.035           | 0.080            | 0.193          | 0.469             | 0.057           | 0.474           | 0.542            | 0.488          | 0.729           |
| 45               | 2.667                 | 0.012            | 0.042         | 0.015           | 0.075            | 0.076          | 0.181             | 0.026           | 0.483           | 0.501            | 0.172          | 0.530           |
| 48               | 2.118                 | 0.016            | 0.027         | 0.010           | 0.076            | 0.040          | 0.121             | 0.014           | 0.507           | 0.517            | 0.115          | 0.529           |
| 52               | 1.539                 | 0.020            | 0.030         | 0.010           | 0.092            | 0.033          | 0.098             | 0.012           | 0.695           | 0.703            | 0.093          | 0.709           |
| 56               | 0.911                 | 0.015            | 0.053         | 0.020           | 0.112            | 0.046          | 0.090             | 0.013           | 0.988           | 0.997            | 0.093          | 1.001           |
| 60               | 0.202                 | 0.019            | 0.092         | 0.022           | 0.160            | 0.035          | 0.070             | 0.012           | 1.240           | 1.254            | 0.082          | 1.256           |
| 64               | -0.186                | 0.044            | 0.367         | 0.102           | 0.281            | 0.249          | 0.291             | 0.033           | 1.608           | 1.674            | 0.396          | 1.720           |
| 68               | -0.092                | 0.054            | 0.493         | 0.142           | 0.309            | 0.312          | 0.397             | 0.042           | 1.636           | 1.739            | 0.520          | 1.815           |

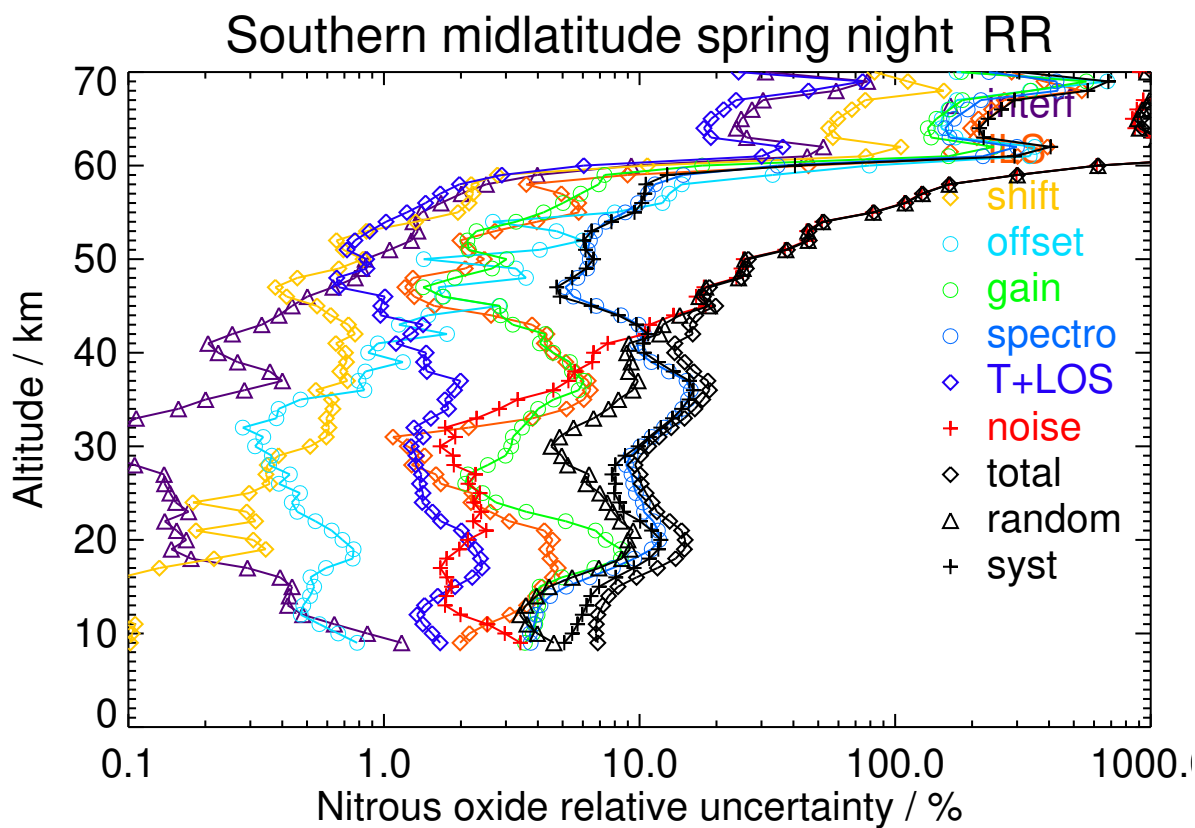

**Figure S192.** V8R\_N2O\_261 Southern midlatitude spring night

**Table S193.** Nitrous oxide error budget for Southern midlatitude summer day. All uncertainties are  $1\sigma$ .

| altitude<br>(km) | mean target<br>(ppbv) | interf<br>(ppbv) | ILS<br>(ppbv) | shift<br>(ppbv) | offset<br>(ppbv) | gain<br>(ppbv) | spectro<br>(ppbv) | T+LOS<br>(ppbv) | noise<br>(ppbv) | random<br>(ppbv) | syst<br>(ppbv) | total<br>(ppbv) |
|------------------|-----------------------|------------------|---------------|-----------------|------------------|----------------|-------------------|-----------------|-----------------|------------------|----------------|-----------------|
| 9                | 307.380               | 4.855            | 3.030         | 0.410           | 2.225            | 8.632          | 15.174            | 5.019           | 9.879           | 13.675           | 16.685         | 21.573          |
| 12               | 309.311               | 1.626            | 7.831         | 0.310           | 1.116            | 11.957         | 13.514            | 3.255           | 4.963           | 11.245           | 17.311         | 20.643          |
| 15               | 303.005               | 1.330            | 14.121        | 0.518           | 1.544            | 12.991         | 16.565            | 4.932           | 5.383           | 18.847           | 18.576         | 26.463          |
| 18               | 254.250               | 0.814            | 11.526        | 0.504           | 1.412            | 13.470         | 18.180            | 4.864           | 4.623           | 17.139           | 19.975         | 26.320          |
| 21               | 199.458               | 0.397            | 10.525        | 0.315           | 0.813            | 2.829          | 22.585            | 3.993           | 3.962           | 10.391           | 23.526         | 25.718          |
| 24               | 168.401               | 0.255            | 4.601         | 0.150           | 0.606            | 1.888          | 16.482            | 2.525           | 3.048           | 6.785            | 16.324         | 17.678          |
| 27               | 124.585               | 0.174            | 1.410         | 0.495           | 0.557            | 2.030          | 13.722            | 2.231           | 3.156           | 5.063            | 13.575         | 14.488          |
| 30               | 78.401                | 0.107            | 1.242         | 0.631           | 0.258            | 1.576          | 7.041             | 1.150           | 1.800           | 2.870            | 7.099          | 7.657           |
| 33               | 53.662                | 0.085            | 1.617         | 0.557           | 0.261            | 1.478          | 4.360             | 0.670           | 1.513           | 1.942            | 4.812          | 5.189           |
| 36               | 29.192                | 0.083            | 1.398         | 0.174           | 0.184            | 1.137          | 2.818             | 0.360           | 0.989           | 1.264            | 3.282          | 3.517           |
| 39               | 14.444                | 0.033            | 0.724         | 0.094           | 0.109            | 0.603          | 1.488             | 0.176           | 0.585           | 0.810            | 1.686          | 1.871           |
| 42               | 5.726                 | 0.012            | 0.183         | 0.044           | 0.068            | 0.183          | 0.630             | 0.073           | 0.385           | 0.539            | 0.577          | 0.790           |
| 45               | 2.758                 | 0.010            | 0.030         | 0.020           | 0.059            | 0.055          | 0.241             | 0.032           | 0.354           | 0.389            | 0.202          | 0.439           |
| 48               | 0.946                 | 0.014            | 0.016         | 0.007           | 0.056            | 0.020          | 0.144             | 0.017           | 0.351           | 0.370            | 0.106          | 0.385           |
| 52               | 0.180                 | 0.017            | 0.011         | 0.005           | 0.074            | 0.009          | 0.041             | 0.007           | 0.513           | 0.520            | 0.017          | 0.520           |
| 56               | 0.057                 | 0.014            | 0.045         | 0.017           | 0.101            | 0.012          | 0.039             | 0.007           | 0.792           | 0.799            | 0.051          | 0.801           |
| 60               | 0.201                 | 0.015            | 0.041         | 0.014           | 0.140            | 0.015          | 0.045             | 0.008           | 1.063           | 1.074            | 0.025          | 1.074           |
| 64               | -0.378                | 0.058            | 0.283         | 0.095           | 0.253            | 0.133          | 0.262             | 0.018           | 1.443           | 1.478            | 0.373          | 1.525           |
| 68               | -0.352                | 0.075            | 0.384         | 0.131           | 0.286            | 0.169          | 0.363             | 0.025           | 1.532           | 1.571            | 0.541          | 1.661           |

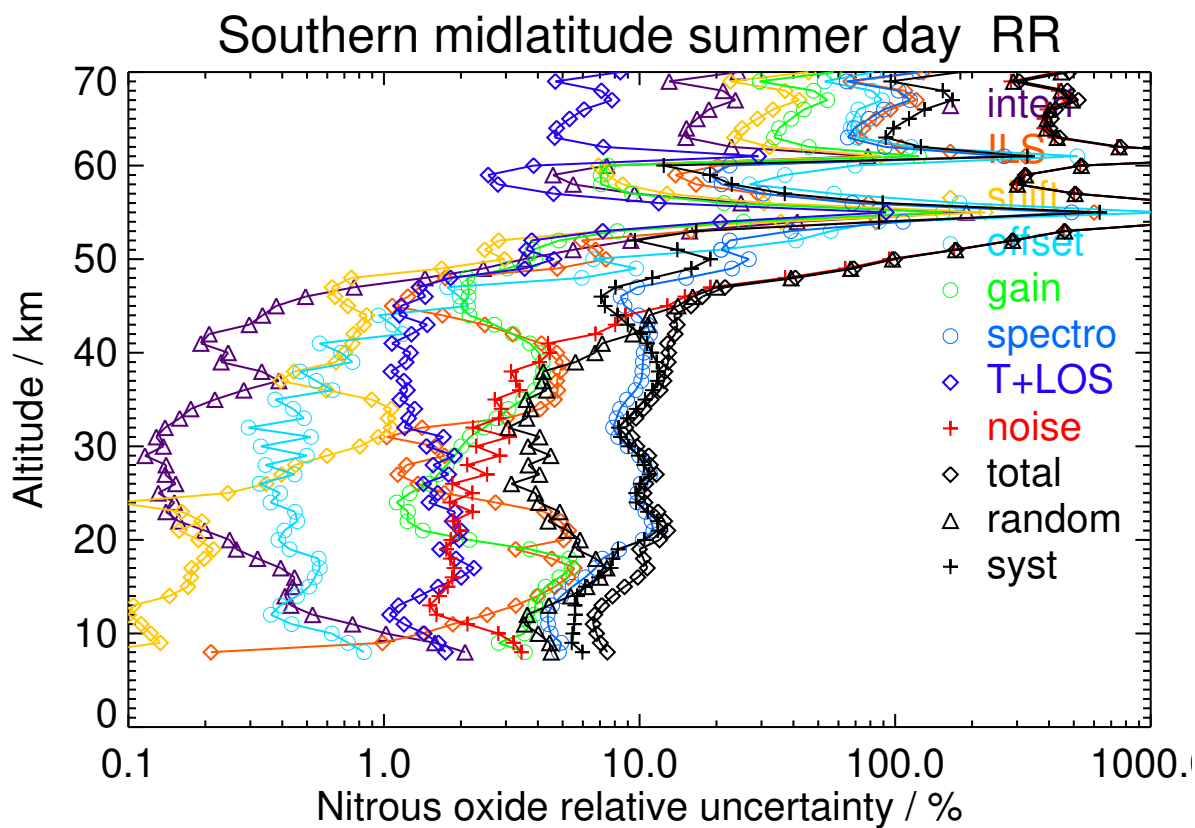

**Figure S193.** V8R\_N2O\_261 Southern midlatitude summer day

**Table S194.** Nitrous oxide error budget for Southern midlatitude summer night. All uncertainties are  $1\sigma$ .

| altitude<br>(km) | mean target<br>(ppbv) | interf<br>(ppbv) | ILS<br>(ppbv) | shift<br>(ppbv) | offset<br>(ppbv) | gain<br>(ppbv) | spectro<br>(ppbv) | T+LOS<br>(ppbv) | noise<br>(ppbv) | random<br>(ppbv) | syst<br>(ppbv) | total<br>(ppbv) |
|------------------|-----------------------|------------------|---------------|-----------------|------------------|----------------|-------------------|-----------------|-----------------|------------------|----------------|-----------------|
| 9                | 309.842               | 4.115            | 2.119         | 0.427           | 2.089            | 7.747          | 13.058            | 4.264           | 9.596           | 12.514           | 14.497         | 19.151          |
| 12               | 311.707               | 1.254            | 6.197         | 0.286           | 1.099            | 11.111         | 13.428            | 3.018           | 4.878           | 7.672            | 17.863         | 19.441          |
| 15               | 293.503               | 1.271            | 11.337        | 0.372           | 1.514            | 13.058         | 16.667            | 4.645           | 5.142           | 11.993           | 22.024         | 25.078          |
| 18               | 264.198               | 0.674            | 11.125        | 0.777           | 2.164            | 20.590         | 22.282            | 5.306           | 4.320           | 16.168           | 28.903         | 33.117          |
| 21               | 200.606               | 0.312            | 6.233         | 0.455           | 0.626            | 6.523          | 23.645            | 3.208           | 3.853           | 9.634            | 23.948         | 25.813          |
| 24               | 168.166               | 0.288            | 3.429         | 0.231           | 0.544            | 1.469          | 15.225            | 2.298           | 3.060           | 5.890            | 15.037         | 16.149          |
| 27               | 117.414               | 0.164            | 0.995         | 0.518           | 0.537            | 1.640          | 12.956            | 2.077           | 3.131           | 4.452            | 12.901         | 13.647          |
| 30               | 79.352                | 0.109            | 1.285         | 0.689           | 0.265            | 1.731          | 7.056             | 1.128           | 1.778           | 2.579            | 7.264          | 7.708           |
| 33               | 53.815                | 0.084            | 1.637         | 0.549           | 0.254            | 1.679          | 4.486             | 0.635           | 1.459           | 1.884            | 4.997          | 5.341           |
| 36               | 29.743                | 0.080            | 1.625         | 0.176           | 0.179            | 1.195          | 3.011             | 0.362           | 0.948           | 1.207            | 3.574          | 3.773           |
| 39               | 12.878                | 0.031            | 0.719         | 0.091           | 0.100            | 0.534          | 1.401             | 0.154           | 0.528           | 0.752            | 1.588          | 1.757           |
| 42               | 5.677                 | 0.010            | 0.227         | 0.054           | 0.065            | 0.160          | 0.580             | 0.064           | 0.350           | 0.503            | 0.542          | 0.739           |
| 45               | 2.138                 | 0.010            | 0.025         | 0.017           | 0.058            | 0.040          | 0.232             | 0.031           | 0.333           | 0.367            | 0.193          | 0.414           |
| 48               | 0.992                 | 0.014            | 0.016         | 0.007           | 0.057            | 0.020          | 0.106             | 0.013           | 0.340           | 0.356            | 0.068          | 0.362           |
| 52               | 0.153                 | 0.017            | 0.014         | 0.006           | 0.077            | 0.008          | 0.045             | 0.008           | 0.501           | 0.509            | 0.026          | 0.510           |
| 56               | 0.075                 | 0.014            | 0.035         | 0.014           | 0.103            | 0.013          | 0.033             | 0.006           | 0.769           | 0.776            | 0.040          | 0.777           |
| 60               | -0.254                | 0.015            | 0.033         | 0.012           | 0.134            | 0.016          | 0.034             | 0.006           | 1.029           | 1.039            | 0.019          | 1.039           |
| 64               | -0.639                | 0.049            | 0.241         | 0.079           | 0.240            | 0.123          | 0.233             | 0.015           | 1.362           | 1.393            | 0.330          | 1.432           |
| 68               | -0.855                | 0.073            | 0.392         | 0.136           | 0.279            | 0.179          | 0.385             | 0.026           | 1.499           | 1.542            | 0.555          | 1.638           |

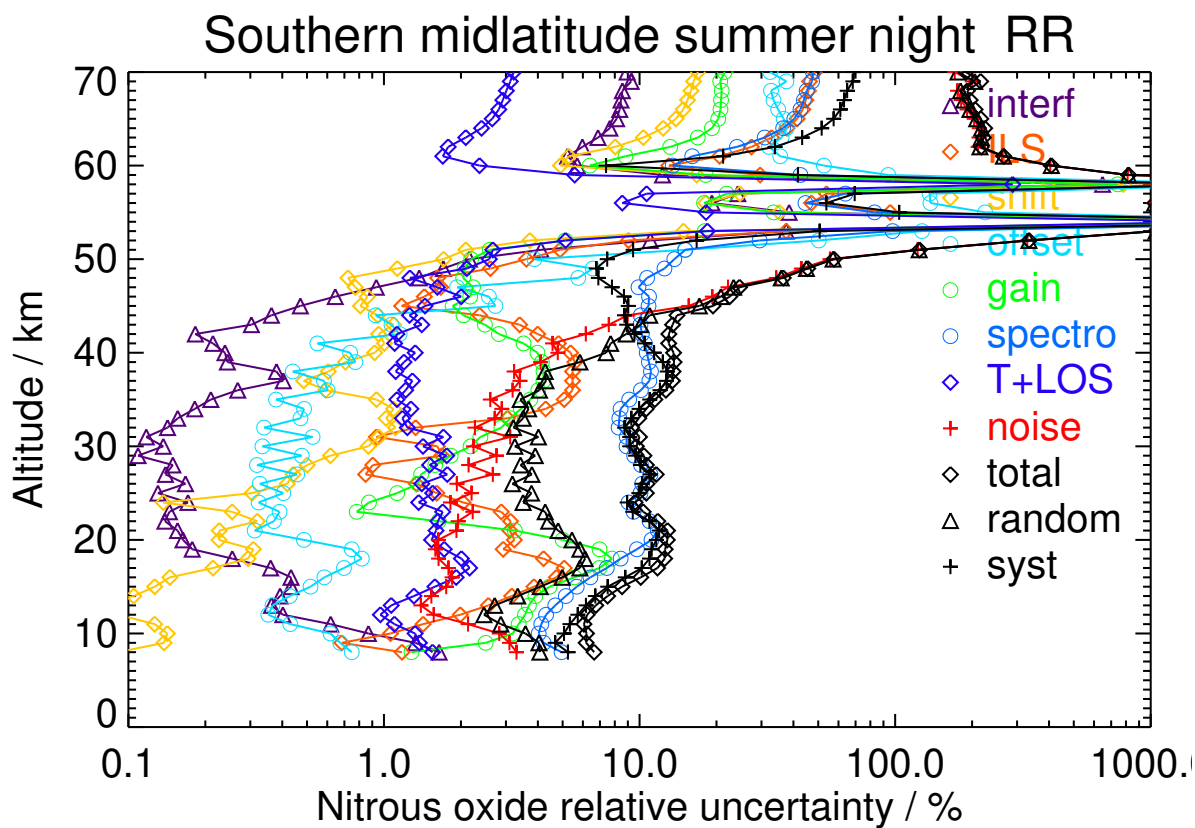

**Figure S194.** V8R\_N2O\_261 Southern midlatitude summer night

**Table S195.** Nitrous oxide error budget for Southern midlatitude autumn day. All uncertainties are  $1\sigma$ .

| altitude<br>(km) | mean target<br>(ppbv) | interf<br>(ppbv) | ILS<br>(ppbv) | shift<br>(ppbv) | offset<br>(ppbv) | gain<br>(ppbv) | spectro<br>(ppbv) | T+LOS<br>(ppbv) | noise<br>(ppbv) | random<br>(ppbv) | syst<br>(ppbv) | total<br>(ppbv) |
|------------------|-----------------------|------------------|---------------|-----------------|------------------|----------------|-------------------|-----------------|-----------------|------------------|----------------|-----------------|
| 9                | 313.316               | 3.401            | 3.298         | 0.430           | 2.283            | 11.001         | 12.879            | 4.670           | 10.164          | 12.714           | 16.679         | 20.973          |
| 12               | 318.161               | 0.988            | 6.977         | 0.250           | 1.179            | 12.556         | 13.119            | 3.670           | 5.184           | 8.344            | 18.750         | 20.523          |
| 15               | 309.010               | 0.928            | 10.462        | 0.230           | 1.532            | 13.499         | 15.317            | 5.435           | 5.172           | 10.946           | 21.587         | 24.204          |
| 18               | 273.866               | 0.305            | 9.964         | 0.475           | 1.832            | 21.388         | 20.019            | 5.697           | 4.231           | 14.771           | 28.167         | 31.805          |
| 21               | 205.309               | 0.271            | 5.240         | 0.330           | 1.093            | 12.527         | 21.708            | 3.718           | 3.896           | 11.985           | 23.289         | 26.192          |
| 24               | 152.843               | 0.172            | 2.210         | 0.283           | 0.748            | 6.082          | 17.246            | 2.686           | 3.797           | 7.146            | 17.622         | 19.016          |
| 27               | 104.994               | 0.111            | 1.389         | 0.303           | 0.458            | 2.596          | 12.313            | 1.896           | 2.925           | 4.629            | 12.301         | 13.143          |
| 30               | 61.560                | 0.054            | 0.627         | 0.325           | 0.345            | 1.680          | 8.103             | 1.237           | 2.313           | 3.965            | 7.762          | 8.716           |
| 33               | 34.829                | 0.063            | 1.160         | 0.224           | 0.281            | 1.439          | 4.565             | 0.615           | 1.712           | 2.910            | 4.385          | 5.263           |
| 36               | 17.696                | 0.049            | 0.999         | 0.123           | 0.191            | 1.099          | 2.611             | 0.268           | 1.067           | 2.358            | 2.173          | 3.207           |
| 39               | 11.299                | 0.041            | 0.707         | 0.038           | 0.136            | 0.796          | 1.570             | 0.144           | 0.762           | 1.649            | 1.225          | 2.054           |
| 42               | 7.239                 | 0.020            | 0.389         | 0.042           | 0.100            | 0.468          | 0.932             | 0.076           | 0.651           | 1.080            | 0.717          | 1.296           |
| 45               | 4.721                 | 0.014            | 0.118         | 0.030           | 0.091            | 0.187          | 0.488             | 0.045           | 0.653           | 0.764            | 0.377          | 0.852           |
| 48               | 3.303                 | 0.017            | 0.056         | 0.014           | 0.096            | 0.089          | 0.278             | 0.032           | 0.689           | 0.722            | 0.231          | 0.758           |
| 52               | 1.942                 | 0.020            | 0.038         | 0.012           | 0.106            | 0.062          | 0.161             | 0.023           | 0.896           | 0.909            | 0.141          | 0.920           |
| 56               | 1.399                 | 0.016            | 0.023         | 0.013           | 0.126            | 0.075          | 0.107             | 0.020           | 1.184           | 1.193            | 0.106          | 1.198           |
| 60               | 0.576                 | 0.020            | 0.073         | 0.019           | 0.207            | 0.056          | 0.083             | 0.019           | 1.443           | 1.462            | 0.060          | 1.463           |
| 64               | -0.657                | 0.029            | 0.109         | 0.034           | 0.329            | 0.167          | 0.105             | 0.028           | 1.765           | 1.804            | 0.154          | 1.810           |
| 68               | -1.131                | 0.025            | 0.074         | 0.024           | 0.351            | 0.221          | 0.090             | 0.032           | 1.740           | 1.781            | 0.203          | 1.793           |

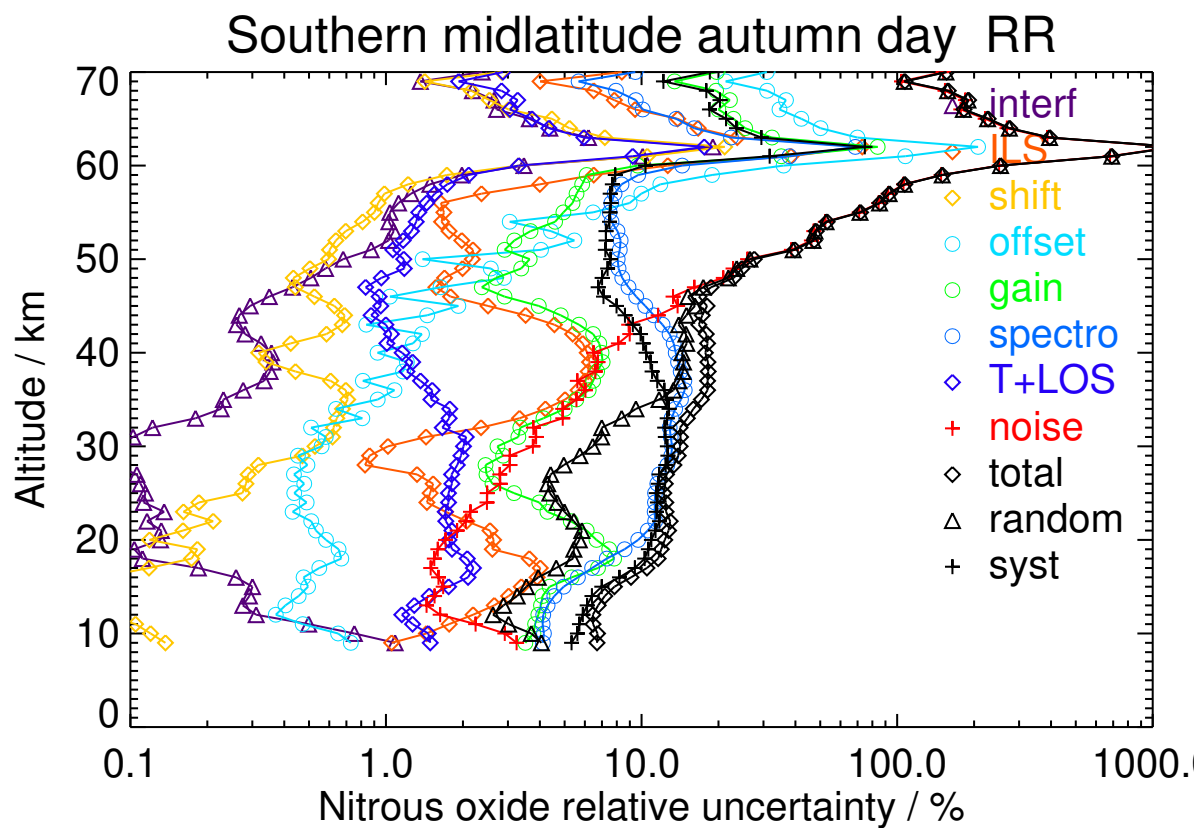

**Figure S195.** V8R\_N2O\_261 Southern midlatitude autumn day

**Table S196.** Nitrous oxide error budget for Southern midlatitude autumn night. All uncertainties are  $1\sigma$ .

| altitude<br>(km) | mean target<br>(ppbv) | interf<br>(ppbv) | ILS<br>(ppbv) | shift<br>(ppbv) | offset<br>(ppbv) | gain<br>(ppbv) | spectro<br>(ppbv) | T+LOS<br>(ppbv) | noise<br>(ppbv) | random<br>(ppbv) | syst<br>(ppbv) | total<br>(ppbv) |
|------------------|-----------------------|------------------|---------------|-----------------|------------------|----------------|-------------------|-----------------|-----------------|------------------|----------------|-----------------|
| 9                | 311.848               | 3.391            | 2.343         | 0.510           | 2.243            | 8.820          | 11.877            | 4.169           | 10.315          | 12.294           | 14.620         | 19.102          |
| 12               | 320.248               | 1.079            | 8.021         | 0.234           | 1.177            | 13.525         | 13.211            | 3.400           | 4.909           | 8.588            | 19.655         | 21.449          |
| 15               | 309.600               | 1.093            | 12.888        | 0.237           | 1.646            | 16.134         | 15.455            | 5.631           | 5.465           | 10.743           | 24.807         | 27.034          |
| 18               | 272.216               | 0.369            | 11.951        | 0.486           | 1.910            | 22.179         | 20.106            | 5.899           | 4.263           | 13.449           | 30.251         | 33.106          |
| 21               | 200.913               | 0.277            | 6.334         | 0.305           | 1.127            | 11.605         | 21.452            | 3.754           | 3.984           | 12.535           | 22.567         | 25.815          |
| 24               | 149.954               | 0.195            | 3.263         | 0.298           | 0.693            | 3.576          | 15.766            | 2.474           | 3.249           | 6.328            | 15.787         | 17.008          |
| 27               | 104.465               | 0.115            | 1.958         | 0.309           | 0.602            | 1.706          | 12.962            | 2.083           | 3.339           | 5.698            | 12.579         | 13.810          |
| 30               | 61.180                | 0.060            | 0.542         | 0.394           | 0.229            | 1.512          | 7.463             | 1.109           | 1.878           | 3.797            | 6.987          | 7.952           |
| 33               | 35.868                | 0.059            | 0.954         | 0.283           | 0.261            | 1.138          | 4.533             | 0.562           | 1.647           | 3.162            | 3.991          | 5.092           |
| 36               | 19.327                | 0.054            | 0.914         | 0.192           | 0.212            | 1.040          | 2.336             | 0.264           | 1.140           | 2.175            | 2.024          | 2.971           |
| 39               | 14.523                | 0.054            | 0.792         | 0.103           | 0.159            | 0.921          | 1.618             | 0.153           | 0.807           | 1.756            | 1.313          | 2.193           |
| 42               | 9.510                 | 0.026            | 0.511         | 0.058           | 0.116            | 0.604          | 1.160             | 0.092           | 0.673           | 1.272            | 0.912          | 1.565           |
| 45               | 5.432                 | 0.014            | 0.142         | 0.046           | 0.096            | 0.220          | 0.619             | 0.050           | 0.661           | 0.838            | 0.448          | 0.950           |
| 48               | 3.672                 | 0.018            | 0.061         | 0.018           | 0.088            | 0.087          | 0.306             | 0.029           | 0.655           | 0.701            | 0.229          | 0.737           |
| 52               | 2.379                 | 0.021            | 0.049         | 0.014           | 0.106            | 0.052          | 0.182             | 0.023           | 0.905           | 0.919            | 0.155          | 0.932           |
| 56               | 1.517                 | 0.017            | 0.034         | 0.013           | 0.123            | 0.058          | 0.118             | 0.020           | 1.169           | 1.179            | 0.108          | 1.184           |
| 60               | 0.425                 | 0.025            | 0.093         | 0.027           | 0.207            | 0.061          | 0.092             | 0.018           | 1.434           | 1.453            | 0.099          | 1.457           |
| 64               | -0.438                | 0.040            | 0.160         | 0.061           | 0.324            | 0.180          | 0.171             | 0.031           | 1.761           | 1.802            | 0.224          | 1.816           |
| 68               | -0.548                | 0.040            | 0.176         | 0.070           | 0.344            | 0.214          | 0.202             | 0.034           | 1.735           | 1.785            | 0.257          | 1.804           |

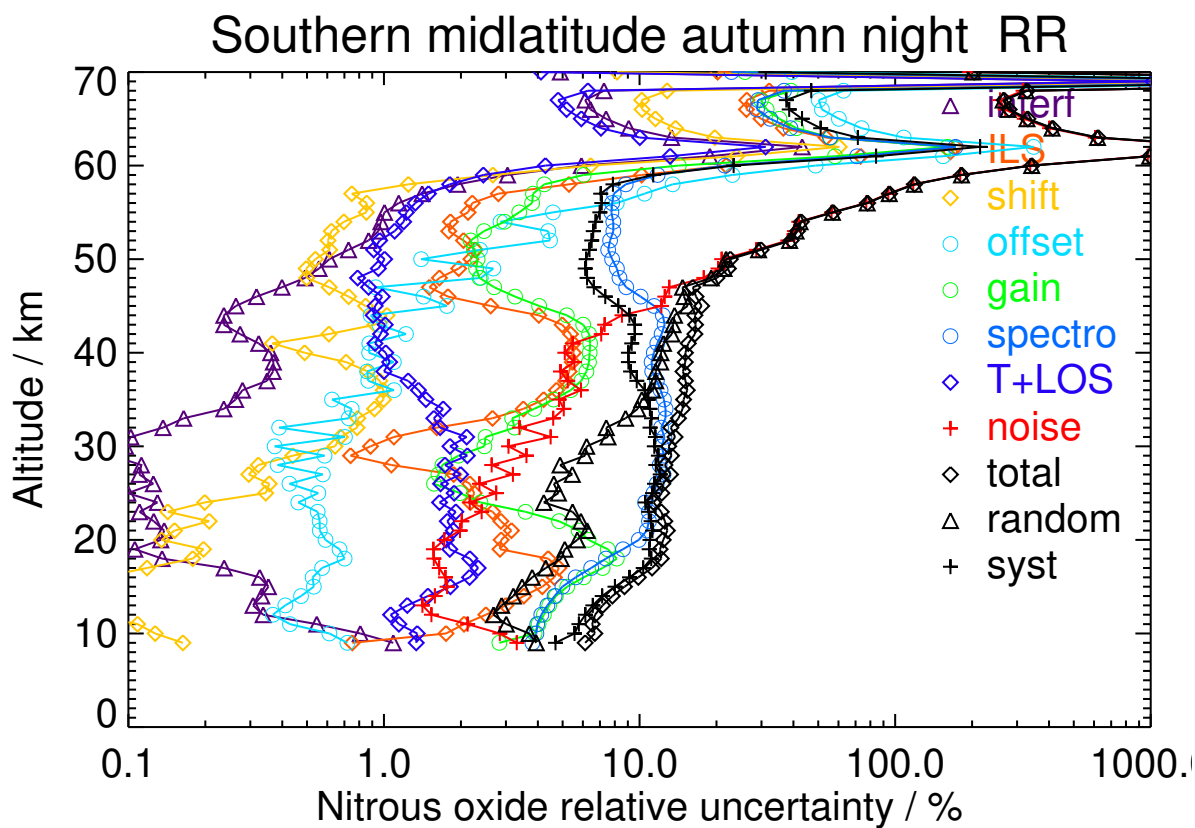

**Figure S196.** V8R\_N2O\_261 Southern midlatitude autumn night



**Table S197.** Nitrous oxide error budget for Southern polar winter day. All uncertainties are  $1\sigma$ .

| altitude<br>(km) | mean target<br>(ppbv) | interf<br>(ppbv) | ILS<br>(ppbv) | shift<br>(ppbv) | offset<br>(ppbv) | gain<br>(ppbv) | spectro<br>(ppbv) | T+LOS<br>(ppbv) | noise<br>(ppbv) | random<br>(ppbv) | syst<br>(ppbv) | total<br>(ppbv) |
|------------------|-----------------------|------------------|---------------|-----------------|------------------|----------------|-------------------|-----------------|-----------------|------------------|----------------|-----------------|
| 9                | 332.445               | 2.870            | 2.538         | 0.210           | 2.983            | 10.470         | 13.910            | 5.832           | 11.240          | 13.524           | 17.441         | 22.070          |
| 12               | 305.084               | 3.341            | 4.244         | 0.193           | 2.149            | 9.409          | 12.667            | 5.492           | 8.777           | 11.632           | 15.960         | 19.749          |
| 15               | 252.556               | 3.004            | 1.769         | 0.402           | 2.004            | 7.728          | 16.282            | 6.189           | 7.026           | 10.618           | 17.779         | 20.708          |
| 18               | 179.792               | 0.890            | 4.865         | 0.595           | 1.140            | 7.948          | 24.367            | 4.545           | 4.638           | 7.915            | 25.740         | 26.930          |
| 21               | 89.808                | 0.302            | 3.978         | 0.253           | 0.757            | 3.883          | 16.480            | 2.339           | 3.795           | 6.801            | 16.638         | 17.974          |
| 24               | 42.116                | 0.097            | 2.268         | 0.207           | 0.666            | 1.332          | 8.969             | 1.564           | 3.976           | 6.953            | 7.600          | 10.301          |
| 27               | 18.669                | 0.070            | 0.912         | 0.078           | 0.281            | 0.576          | 4.426             | 0.608           | 2.342           | 4.677            | 2.196          | 5.167           |
| 30               | 15.992                | 0.061            | 0.283         | 0.083           | 0.382            | 0.506          | 2.062             | 0.470           | 2.346           | 2.694            | 1.792          | 3.236           |
| 33               | 6.974                 | 0.036            | 0.273         | 0.060           | 0.231            | 0.373          | 1.253             | 0.242           | 1.436           | 1.649            | 1.115          | 1.991           |
| 36               | 2.486                 | 0.022            | 0.174         | 0.023           | 0.106            | 0.323          | 0.644             | 0.088           | 0.728           | 1.009            | 0.284          | 1.048           |
| 39               | 1.836                 | 0.010            | 0.112         | 0.011           | 0.055            | 0.122          | 0.387             | 0.033           | 0.478           | 0.623            | 0.150          | 0.640           |
| 42               | 1.140                 | 0.010            | 0.041         | 0.005           | 0.053            | 0.018          | 0.123             | 0.014           | 0.464           | 0.478            | 0.081          | 0.485           |
| 45               | 1.141                 | 0.013            | 0.027         | 0.005           | 0.065            | 0.018          | 0.079             | 0.009           | 0.542           | 0.550            | 0.053          | 0.553           |
| 48               | 0.847                 | 0.019            | 0.025         | 0.005           | 0.086            | 0.015          | 0.078             | 0.011           | 0.637           | 0.647            | 0.053          | 0.649           |
| 52               | 0.602                 | 0.019            | 0.024         | 0.006           | 0.094            | 0.013          | 0.066             | 0.010           | 0.795           | 0.803            | 0.036          | 0.804           |
| 56               | 0.316                 | 0.016            | 0.020         | 0.007           | 0.114            | 0.018          | 0.045             | 0.010           | 1.063           | 1.070            | 0.031          | 1.071           |
| 60               | 0.455                 | 0.013            | 0.021         | 0.012           | 0.197            | 0.024          | 0.044             | 0.011           | 1.401           | 1.415            | 0.031          | 1.416           |
| 64               | 0.716                 | 0.015            | 0.052         | 0.015           | 0.319            | 0.025          | 0.044             | 0.012           | 1.743           | 1.773            | 0.048          | 1.774           |
| 68               | 0.472                 | 0.014            | 0.058         | 0.013           | 0.334            | 0.025          | 0.039             | 0.013           | 1.699           | 1.732            | 0.048          | 1.733           |

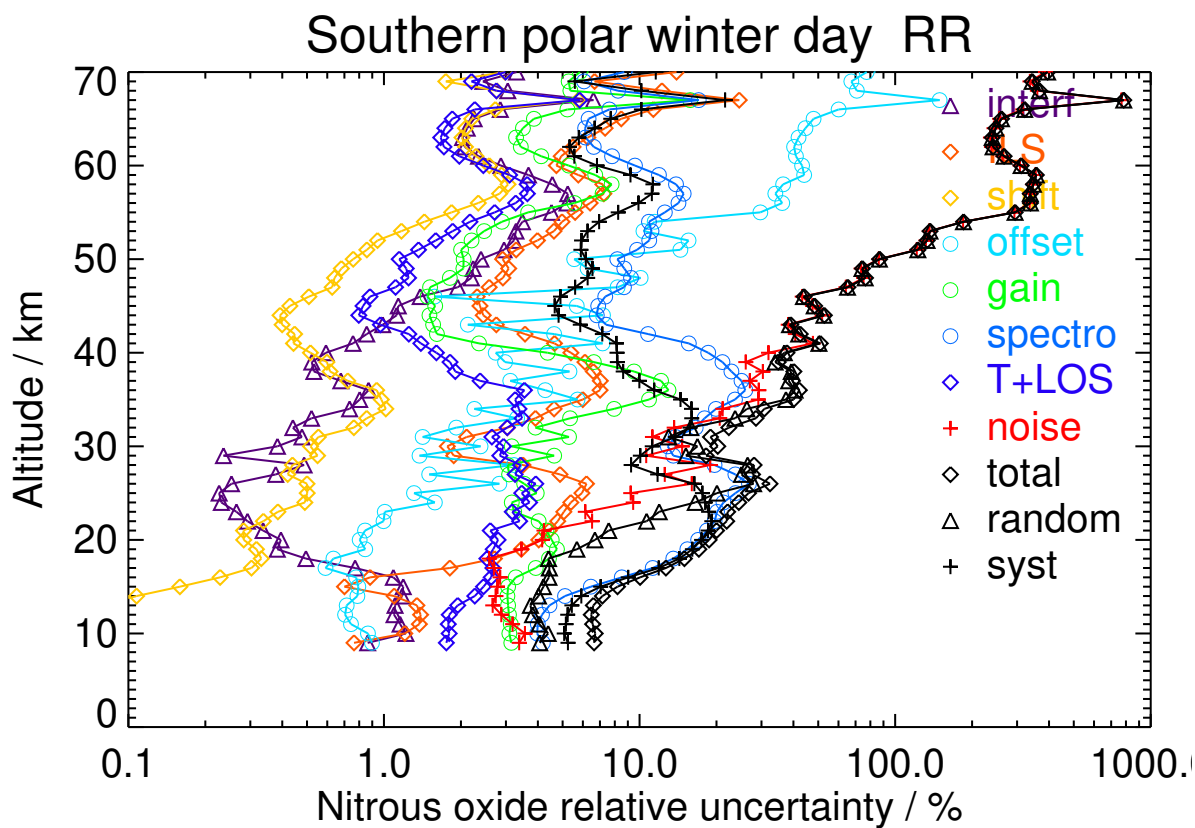

**Figure S197.** V8R\_N2O\_261 Southern polar winter day



**Table S198.** Nitrous oxide error budget for Southern polar winter night. All uncertainties are  $1\sigma$ .

| altitude<br>(km) | mean target<br>(ppbv) | interf<br>(ppbv) | ILS<br>(ppbv) | shift<br>(ppbv) | offset<br>(ppbv) | gain<br>(ppbv) | spectro<br>(ppbv) | T+LOS<br>(ppbv) | noise<br>(ppbv) | random<br>(ppbv) | syst<br>(ppbv) | total<br>(ppbv) |
|------------------|-----------------------|------------------|---------------|-----------------|------------------|----------------|-------------------|-----------------|-----------------|------------------|----------------|-----------------|
| 9                | 330.581               | 3.097            | 2.679         | 0.205           | 2.769            | 10.348         | 12.206            | 5.604           | 10.406          | 13.219           | 15.668         | 20.499          |
| 12               | 304.385               | 2.586            | 5.190         | 0.116           | 1.711            | 10.652         | 10.711            | 4.616           | 6.592           | 9.829            | 15.261         | 18.153          |
| 15               | 250.987               | 2.317            | 3.316         | 0.218           | 1.933            | 7.866          | 11.513            | 6.074           | 6.810           | 10.958           | 13.332         | 17.258          |
| 18               | 175.892               | 0.719            | 2.161         | 0.367           | 1.114            | 6.936          | 14.476            | 4.820           | 4.555           | 8.354            | 15.440         | 17.556          |
| 21               | 93.701                | 0.343            | 3.422         | 0.240           | 0.776            | 3.747          | 13.192            | 2.797           | 4.224           | 6.281            | 13.667         | 15.041          |
| 24               | 45.904                | 0.097            | 2.455         | 0.232           | 0.707            | 1.497          | 8.696             | 1.794           | 4.076           | 5.580            | 8.552          | 10.212          |
| 27               | 14.428                | 0.056            | 0.896         | 0.090           | 0.327            | 1.106          | 3.254             | 0.681           | 2.285           | 3.614            | 2.314          | 4.292           |
| 30               | 12.749                | 0.067            | 0.391         | 0.105           | 0.333            | 0.378          | 1.714             | 0.428           | 2.154           | 2.501            | 1.388          | 2.860           |
| 33               | 6.966                 | 0.038            | 0.247         | 0.062           | 0.206            | 0.436          | 1.182             | 0.224           | 1.247           | 1.475            | 1.060          | 1.817           |
| 36               | 2.231                 | 0.012            | 0.132         | 0.020           | 0.119            | 0.194          | 0.402             | 0.079           | 0.705           | 0.811            | 0.279          | 0.857           |
| 39               | 1.433                 | 0.008            | 0.064         | 0.008           | 0.073            | 0.113          | 0.205             | 0.034           | 0.498           | 0.547            | 0.119          | 0.560           |
| 42               | 0.905                 | 0.010            | 0.035         | 0.005           | 0.067            | 0.029          | 0.109             | 0.015           | 0.501           | 0.517            | 0.056          | 0.520           |
| 45               | 0.939                 | 0.013            | 0.020         | 0.005           | 0.074            | 0.023          | 0.073             | 0.011           | 0.573           | 0.581            | 0.046          | 0.583           |
| 48               | 0.626                 | 0.019            | 0.016         | 0.005           | 0.086            | 0.026          | 0.052             | 0.010           | 0.636           | 0.644            | 0.035          | 0.645           |
| 52               | 0.800                 | 0.020            | 0.016         | 0.007           | 0.099            | 0.031          | 0.052             | 0.012           | 0.840           | 0.848            | 0.036          | 0.849           |
| 56               | 0.221                 | 0.018            | 0.022         | 0.008           | 0.116            | 0.036          | 0.042             | 0.013           | 1.107           | 1.115            | 0.029          | 1.115           |
| 60               | 0.064                 | 0.015            | 0.036         | 0.010           | 0.194            | 0.029          | 0.040             | 0.011           | 1.396           | 1.411            | 0.028          | 1.411           |
| 64               | -0.225                | 0.017            | 0.068         | 0.012           | 0.320            | 0.032          | 0.039             | 0.013           | 1.742           | 1.772            | 0.050          | 1.773           |
| 68               | -0.431                | 0.017            | 0.056         | 0.011           | 0.335            | 0.037          | 0.038             | 0.015           | 1.700           | 1.734            | 0.049          | 1.735           |

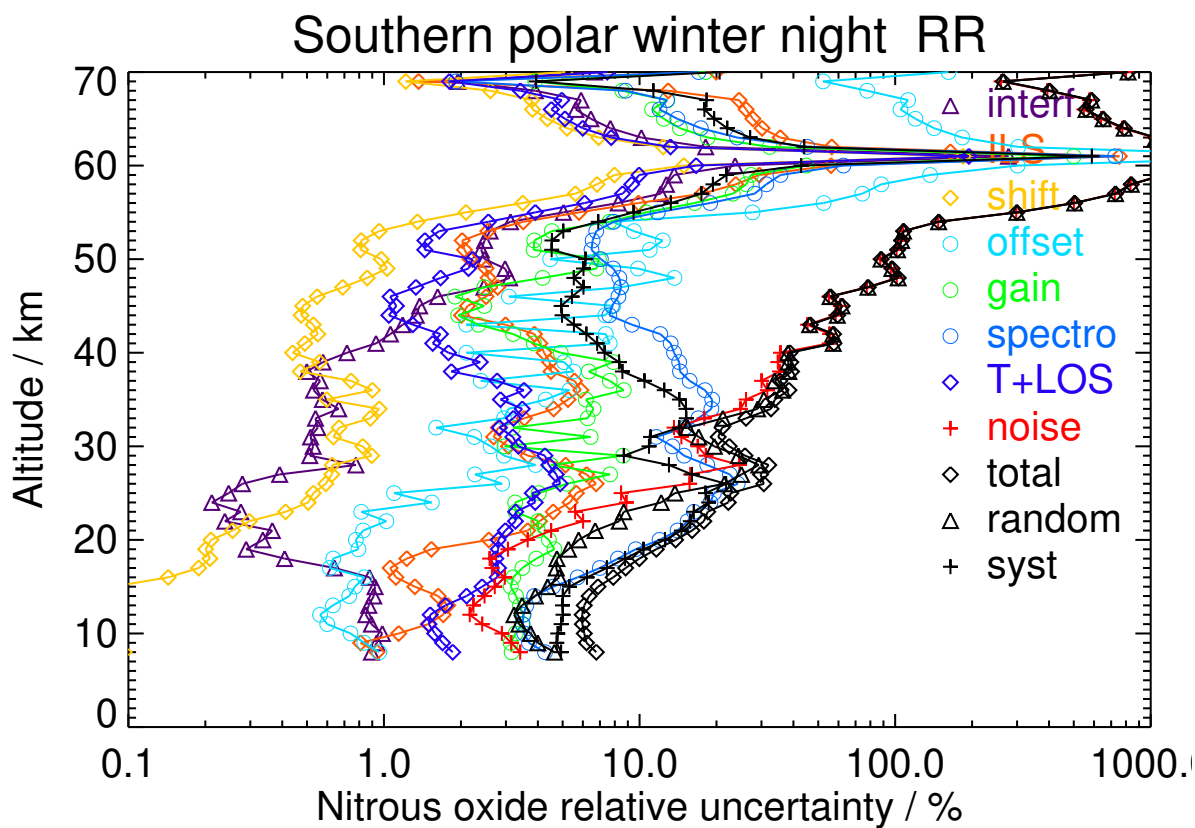

**Figure S198.** V8R\_N2O\_261 Southern polar winter night

**Table S199.** Nitrous oxide error budget for Southern polar spring day. All uncertainties are  $1\sigma$ .

| altitude<br>(km) | mean target<br>(ppbv) | interf<br>(ppbv) | ILS<br>(ppbv) | shift<br>(ppbv) | offset<br>(ppbv) | gain<br>(ppbv) | spectro<br>(ppbv) | T+LOS<br>(ppbv) | noise<br>(ppbv) | random<br>(ppbv) | syst<br>(ppbv) | total<br>(ppbv) |
|------------------|-----------------------|------------------|---------------|-----------------|------------------|----------------|-------------------|-----------------|-----------------|------------------|----------------|-----------------|
| 9                | 327.291               | 5.449            | 3.579         | 0.335           | 2.679            | 9.283          | 16.846            | 6.227           | 11.140          | 15.298           | 18.671         | 24.138          |
| 12               | 288.172               | 2.805            | 6.294         | 0.572           | 1.576            | 8.313          | 16.721            | 5.359           | 6.948           | 13.286           | 17.305         | 21.817          |
| 15               | 228.751               | 1.176            | 4.331         | 0.569           | 1.577            | 4.526          | 15.520            | 5.851           | 6.349           | 11.668           | 14.923         | 18.943          |
| 18               | 168.405               | 0.364            | 4.351         | 0.468           | 0.779            | 5.427          | 18.475            | 4.174           | 3.422           | 10.175           | 17.784         | 20.489          |
| 21               | 121.676               | 0.199            | 3.933         | 0.425           | 0.531            | 5.126          | 13.921            | 2.013           | 2.555           | 9.346            | 12.621         | 15.705          |
| 24               | 110.794               | 0.102            | 2.044         | 0.262           | 0.551            | 2.397          | 12.031            | 1.714           | 2.985           | 9.085            | 9.185          | 12.919          |
| 27               | 101.908               | 0.125            | 1.170         | 0.347           | 0.304            | 2.170          | 10.084            | 1.198           | 1.787           | 7.182            | 7.813          | 10.612          |
| 30               | 88.874                | 0.059            | 0.567         | 0.564           | 0.395            | 3.968          | 9.042             | 1.320           | 1.895           | 6.545            | 7.797          | 10.180          |
| 33               | 53.529                | 0.079            | 0.898         | 0.401           | 0.188            | 2.372          | 6.908             | 0.891           | 1.264           | 4.955            | 5.674          | 7.533           |
| 36               | 20.730                | 0.066            | 1.095         | 0.156           | 0.112            | 0.835          | 3.142             | 0.368           | 0.792           | 2.403            | 2.607          | 3.546           |
| 39               | 8.560                 | 0.022            | 0.481         | 0.064           | 0.078            | 0.558          | 1.027             | 0.136           | 0.493           | 0.964            | 0.970          | 1.368           |
| 42               | 4.298                 | 0.013            | 0.194         | 0.026           | 0.048            | 0.168          | 0.420             | 0.058           | 0.374           | 0.483            | 0.395          | 0.624           |
| 45               | 2.826                 | 0.011            | 0.061         | 0.015           | 0.049            | 0.084          | 0.173             | 0.028           | 0.384           | 0.403            | 0.171          | 0.438           |
| 48               | 2.312                 | 0.016            | 0.034         | 0.011           | 0.067            | 0.058          | 0.126             | 0.018           | 0.453           | 0.463            | 0.126          | 0.480           |
| 52               | 1.599                 | 0.018            | 0.029         | 0.009           | 0.074            | 0.033          | 0.094             | 0.012           | 0.577           | 0.584            | 0.090          | 0.591           |
| 56               | 1.086                 | 0.020            | 0.045         | 0.020           | 0.096            | 0.072          | 0.097             | 0.014           | 0.859           | 0.870            | 0.094          | 0.875           |
| 60               | 0.559                 | 0.019            | 0.069         | 0.010           | 0.151            | 0.055          | 0.065             | 0.014           | 1.193           | 1.205            | 0.078          | 1.208           |
| 64               | -0.255                | 0.050            | 0.297         | 0.083           | 0.279            | 0.441          | 0.233             | 0.046           | 1.591           | 1.660            | 0.450          | 1.720           |
| 68               | -0.318                | 0.064            | 0.403         | 0.120           | 0.298            | 0.516          | 0.333             | 0.056           | 1.608           | 1.699            | 0.590          | 1.799           |

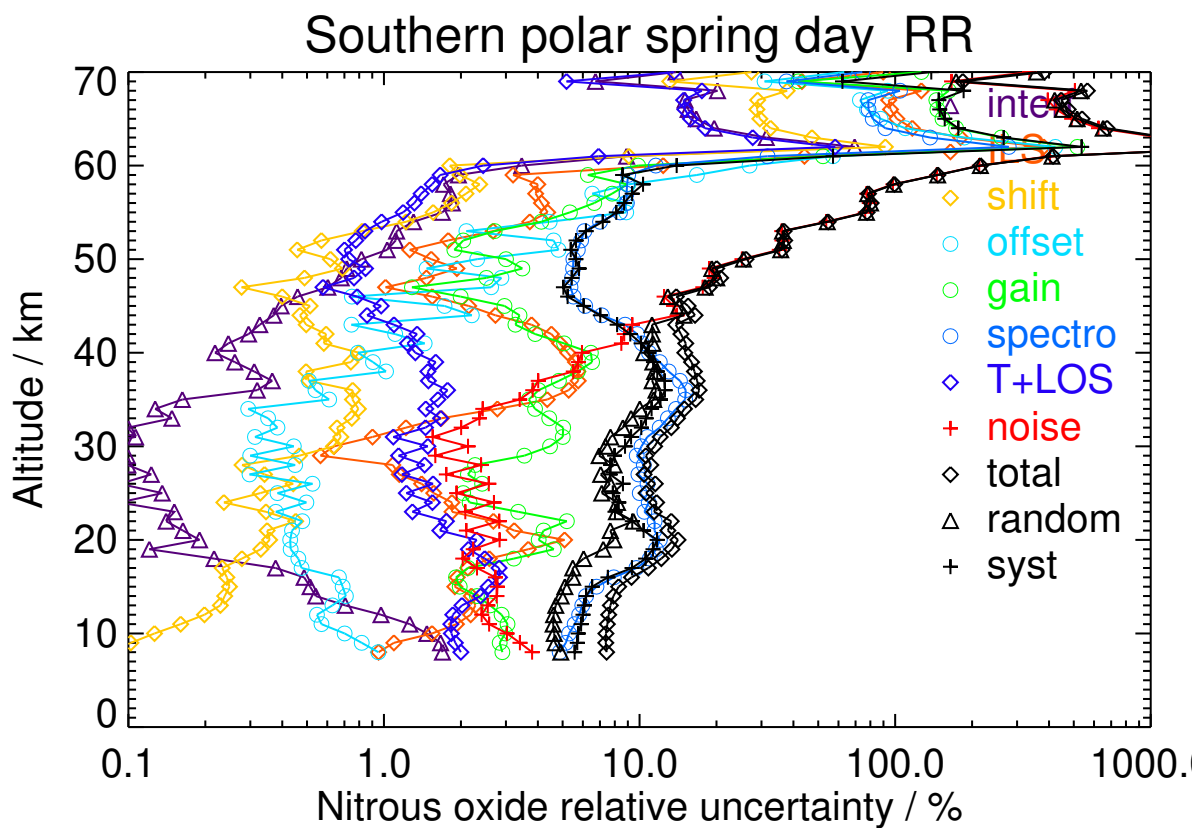

**Figure S199.** V8R\_N2O\_261 Southern polar spring day

**Table S200.** Nitrous oxide error budget for Southern polar spring night. All uncertainties are  $1\sigma$ .

| altitude<br>(km) | mean target<br>(ppbv) | interf<br>(ppbv) | ILS<br>(ppbv) | shift<br>(ppbv) | offset<br>(ppbv) | gain<br>(ppbv) | spectro<br>(ppbv) | T+LOS<br>(ppbv) | noise<br>(ppbv) | random<br>(ppbv) | syst<br>(ppbv) | total<br>(ppbv) |
|------------------|-----------------------|------------------|---------------|-----------------|------------------|----------------|-------------------|-----------------|-----------------|------------------|----------------|-----------------|
| 9                | 314.236               | 4.178            | 2.076         | 0.382           | 2.234            | 7.405          | 12.870            | 4.970           | 9.647           | 12.691           | 14.286         | 19.109          |
| 12               | 275.130               | 1.587            | 4.686         | 0.574           | 1.297            | 6.077          | 13.116            | 3.741           | 6.016           | 10.778           | 13.018         | 16.901          |
| 15               | 217.900               | 1.062            | 4.923         | 0.660           | 1.392            | 5.542          | 14.034            | 4.853           | 5.858           | 11.964           | 13.043         | 17.699          |
| 18               | 171.002               | 0.358            | 4.672         | 0.558           | 0.855            | 6.869          | 16.827            | 3.710           | 3.238           | 11.029           | 15.998         | 19.432          |
| 21               | 139.957               | 0.202            | 4.682         | 0.385           | 0.690            | 7.640          | 16.390            | 2.175           | 2.637           | 10.851           | 15.606         | 19.008          |
| 24               | 119.894               | 0.100            | 2.588         | 0.292           | 0.610            | 5.126          | 11.395            | 1.865           | 3.153           | 9.080            | 9.709          | 13.293          |
| 27               | 127.378               | 0.132            | 1.302         | 0.339           | 0.339            | 3.556          | 12.039            | 1.392           | 1.992           | 7.249            | 10.624         | 12.862          |
| 30               | 95.465                | 0.065            | 1.082         | 0.476           | 0.433            | 4.107          | 10.894            | 1.542           | 2.078           | 7.268            | 9.540          | 11.993          |
| 33               | 54.656                | 0.053            | 1.470         | 0.358           | 0.259            | 3.091          | 7.692             | 0.982           | 1.306           | 5.157            | 6.866          | 8.588           |
| 36               | 18.746                | 0.064            | 1.078         | 0.156           | 0.127            | 1.326          | 3.077             | 0.366           | 0.763           | 2.411            | 2.708          | 3.626           |
| 39               | 9.491                 | 0.028            | 0.439         | 0.064           | 0.077            | 0.539          | 0.919             | 0.134           | 0.501           | 0.893            | 0.900          | 1.268           |
| 42               | 5.822                 | 0.016            | 0.272         | 0.033           | 0.054            | 0.298          | 0.576             | 0.073           | 0.408           | 0.579            | 0.578          | 0.819           |
| 45               | 2.808                 | 0.012            | 0.077         | 0.015           | 0.051            | 0.067          | 0.256             | 0.038           | 0.409           | 0.447            | 0.219          | 0.497           |
| 48               | 2.358                 | 0.015            | 0.038         | 0.015           | 0.069            | 0.093          | 0.140             | 0.020           | 0.467           | 0.484            | 0.136          | 0.503           |
| 52               | 1.674                 | 0.018            | 0.027         | 0.009           | 0.073            | 0.038          | 0.108             | 0.014           | 0.588           | 0.596            | 0.100          | 0.604           |
| 56               | 1.239                 | 0.021            | 0.035         | 0.020           | 0.097            | 0.083          | 0.103             | 0.015           | 0.892           | 0.901            | 0.109          | 0.908           |
| 60               | 0.749                 | 0.021            | 0.115         | 0.040           | 0.159            | 0.124          | 0.119             | 0.017           | 1.233           | 1.254            | 0.133          | 1.261           |
| 64               | 0.162                 | 0.047            | 0.343         | 0.132           | 0.284            | 0.529          | 0.397             | 0.054           | 1.625           | 1.712            | 0.606          | 1.816           |
| 68               | -0.039                | 0.056            | 0.395         | 0.140           | 0.300            | 0.710          | 0.444             | 0.069           | 1.611           | 1.729            | 0.762          | 1.890           |

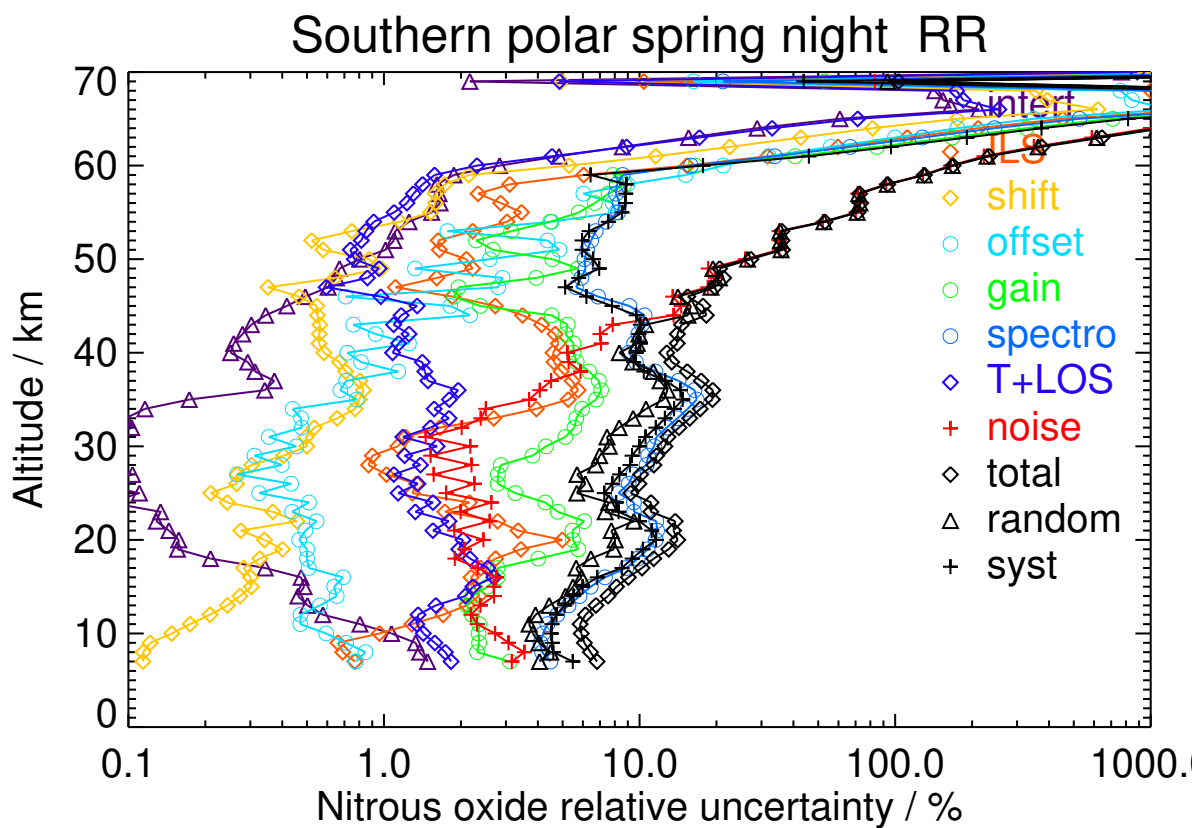

**Figure S200.** V8R\_N2O\_261 Southern polar spring night

**Table S201.** Nitrous oxide error budget for Southern polar summer day. All uncertainties are  $1\sigma$ .

| altitude<br>(km) | mean target<br>(ppbv) | interf<br>(ppbv) | ILS<br>(ppbv) | shift<br>(ppbv) | offset<br>(ppbv) | gain<br>(ppbv) | spectro<br>(ppbv) | T+LOS<br>(ppbv) | noise<br>(ppbv) | random<br>(ppbv) | syst<br>(ppbv) | total<br>(ppbv) |
|------------------|-----------------------|------------------|---------------|-----------------|------------------|----------------|-------------------|-----------------|-----------------|------------------|----------------|-----------------|
| 9                | 312.502               | 3.313            | 7.233         | 0.433           | 1.914            | 3.065          | 14.716            | 4.035           | 9.482           | 11.582           | 16.283         | 19.982          |
| 12               | 298.323               | 0.929            | 5.191         | 0.493           | 0.878            | 7.181          | 14.399            | 2.610           | 4.497           | 8.933            | 15.329         | 17.741          |
| 15               | 277.746               | 0.772            | 5.974         | 0.431           | 1.006            | 5.234          | 16.927            | 3.398           | 4.061           | 9.621            | 16.937         | 19.479          |
| 18               | 237.657               | 0.189            | 10.630        | 0.770           | 0.645            | 5.424          | 23.819            | 3.150           | 2.922           | 7.682            | 25.889         | 27.005          |
| 21               | 172.247               | 0.242            | 9.912         | 0.819           | 0.828            | 4.431          | 19.583            | 2.633           | 2.601           | 6.066            | 21.902         | 22.727          |
| 24               | 150.591               | 0.095            | 3.832         | 0.275           | 0.785            | 1.944          | 15.652            | 2.430           | 3.453           | 5.156            | 15.981         | 16.792          |
| 27               | 103.033               | 0.118            | 1.168         | 0.486           | 0.279            | 1.430          | 10.083            | 1.357           | 1.862           | 2.849            | 10.129         | 10.522          |
| 30               | 71.425                | 0.045            | 0.708         | 0.416           | 0.418            | 1.045          | 7.033             | 1.378           | 2.238           | 2.880            | 7.072          | 7.636           |
| 33               | 40.663                | 0.051            | 0.897         | 0.399           | 0.232            | 1.742          | 4.043             | 0.733           | 1.319           | 1.763            | 4.424          | 4.762           |
| 36               | 19.011                | 0.084            | 0.897         | 0.153           | 0.135            | 0.880          | 2.097             | 0.292           | 0.744           | 0.959            | 2.397          | 2.582           |
| 39               | 7.817                 | 0.023            | 0.525         | 0.065           | 0.065            | 0.338          | 0.940             | 0.123           | 0.425           | 0.654            | 1.025          | 1.216           |
| 42               | 2.151                 | 0.012            | 0.161         | 0.028           | 0.040            | 0.037          | 0.305             | 0.050           | 0.280           | 0.345            | 0.291          | 0.452           |
| 45               | 0.767                 | 0.008            | 0.018         | 0.009           | 0.039            | 0.017          | 0.074             | 0.020           | 0.272           | 0.281            | 0.057          | 0.286           |
| 48               | 0.139                 | 0.011            | 0.016         | 0.008           | 0.049            | 0.007          | 0.046             | 0.009           | 0.299           | 0.305            | 0.033          | 0.307           |
| 52               | 0.028                 | 0.014            | 0.006         | 0.003           | 0.056            | 0.007          | 0.020             | 0.005           | 0.381           | 0.386            | 0.011          | 0.386           |
| 56               | -0.042                | 0.014            | 0.021         | 0.010           | 0.078            | 0.008          | 0.032             | 0.007           | 0.611           | 0.617            | 0.026          | 0.617           |
| 60               | -0.032                | 0.014            | 0.019         | 0.014           | 0.116            | 0.014          | 0.039             | 0.008           | 0.911           | 0.919            | 0.029          | 0.920           |
| 64               | -0.124                | 0.032            | 0.088         | 0.034           | 0.233            | 0.095          | 0.118             | 0.013           | 1.286           | 1.309            | 0.166          | 1.319           |
| 68               | -0.207                | 0.048            | 0.195         | 0.083           | 0.270            | 0.139          | 0.237             | 0.022           | 1.458           | 1.488            | 0.328          | 1.523           |

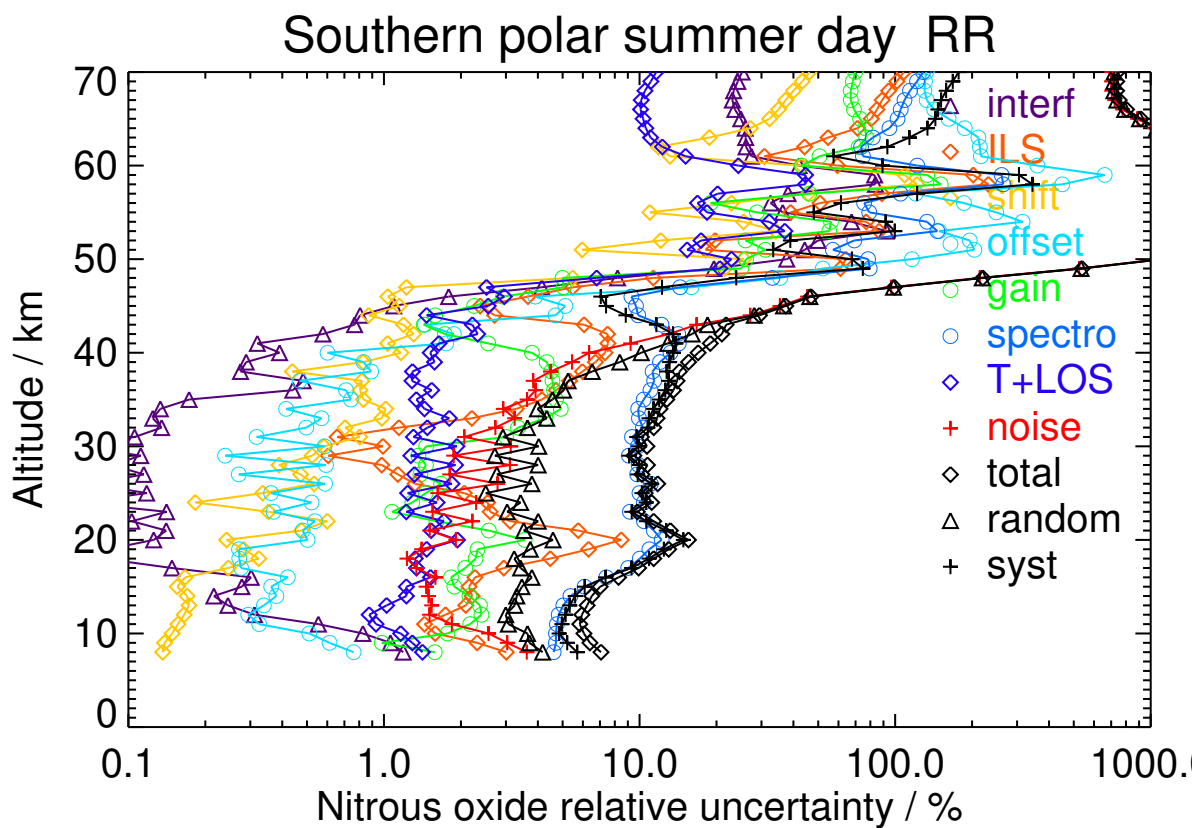

**Figure S201.** V8R\_N2O\_261 Southern polar summer day

**Table S202.** Nitrous oxide error budget for Southern polar summer night. All uncertainties are  $1\sigma$ .

| altitude<br>(km) | mean target<br>(ppbv) | interf<br>(ppbv) | ILS<br>(ppbv) | shift<br>(ppbv) | offset<br>(ppbv) | gain<br>(ppbv) | spectro<br>(ppbv) | T+LOS<br>(ppbv) | noise<br>(ppbv) | random<br>(ppbv) | syst<br>(ppbv) | total<br>(ppbv) |
|------------------|-----------------------|------------------|---------------|-----------------|------------------|----------------|-------------------|-----------------|-----------------|------------------|----------------|-----------------|
| 9                | 307.762               | 3.471            | 4.124         | 0.474           | 2.036            | 4.800          | 12.494            | 3.851           | 9.755           | 12.773           | 12.626         | 17.960          |
| 12               | 300.155               | 0.989            | 6.688         | 0.356           | 0.923            | 10.524         | 13.482            | 2.736           | 4.391           | 8.459            | 17.159         | 19.131          |
| 15               | 285.883               | 0.825            | 14.744        | 0.394           | 1.389            | 15.318         | 15.178            | 4.622           | 4.556           | 13.982           | 23.060         | 26.968          |
| 18               | 253.771               | 0.258            | 8.896         | 0.852           | 1.621            | 19.256         | 21.381            | 3.963           | 3.426           | 13.677           | 27.402         | 30.626          |
| 21               | 182.280               | 0.182            | 7.451         | 0.545           | 0.622            | 5.961          | 20.334            | 2.876           | 3.228           | 8.437            | 21.278         | 22.890          |
| 24               | 150.501               | 0.108            | 4.090         | 0.236           | 0.860            | 2.993          | 16.937            | 2.606           | 3.531           | 5.626            | 17.348         | 18.238          |
| 27               | 96.075                | 0.129            | 1.040         | 0.472           | 0.310            | 1.266          | 9.478             | 1.418           | 2.022           | 2.854            | 9.529          | 9.948           |
| 30               | 63.677                | 0.047            | 0.930         | 0.396           | 0.372            | 1.255          | 6.569             | 1.182           | 2.055           | 2.756            | 6.627          | 7.177           |
| 33               | 35.290                | 0.080            | 1.581         | 0.268           | 0.246            | 1.696          | 3.841             | 0.587           | 1.239           | 1.633            | 4.414          | 4.706           |
| 36               | 13.326                | 0.038            | 0.817         | 0.105           | 0.127            | 0.565          | 1.711             | 0.231           | 0.655           | 0.873            | 1.914          | 2.104           |
| 39               | 5.394                 | 0.012            | 0.328         | 0.041           | 0.060            | 0.161          | 0.649             | 0.087           | 0.359           | 0.442            | 0.708          | 0.835           |
| 42               | 1.009                 | 0.008            | 0.052         | 0.020           | 0.043            | 0.021          | 0.189             | 0.035           | 0.269           | 0.289            | 0.176          | 0.338           |
| 45               | 0.443                 | 0.008            | 0.016         | 0.006           | 0.044            | 0.010          | 0.042             | 0.012           | 0.287           | 0.293            | 0.024          | 0.294           |
| 48               | 0.058                 | 0.013            | 0.007         | 0.006           | 0.055            | 0.006          | 0.032             | 0.006           | 0.335           | 0.341            | 0.024          | 0.342           |
| 52               | -0.018                | 0.016            | 0.007         | 0.004           | 0.069            | 0.008          | 0.022             | 0.005           | 0.469           | 0.474            | 0.013          | 0.475           |
| 56               | 0.072                 | 0.013            | 0.022         | 0.010           | 0.094            | 0.010          | 0.031             | 0.006           | 0.736           | 0.743            | 0.027          | 0.743           |
| 60               | -0.036                | 0.014            | 0.015         | 0.008           | 0.132            | 0.011          | 0.030             | 0.007           | 1.031           | 1.040            | 0.018          | 1.040           |
| 64               | 0.001                 | 0.034            | 0.095         | 0.042           | 0.254            | 0.107          | 0.140             | 0.014           | 1.402           | 1.427            | 0.190          | 1.440           |
| 68               | 0.007                 | 0.049            | 0.182         | 0.082           | 0.284            | 0.140          | 0.241             | 0.022           | 1.513           | 1.545            | 0.318          | 1.578           |

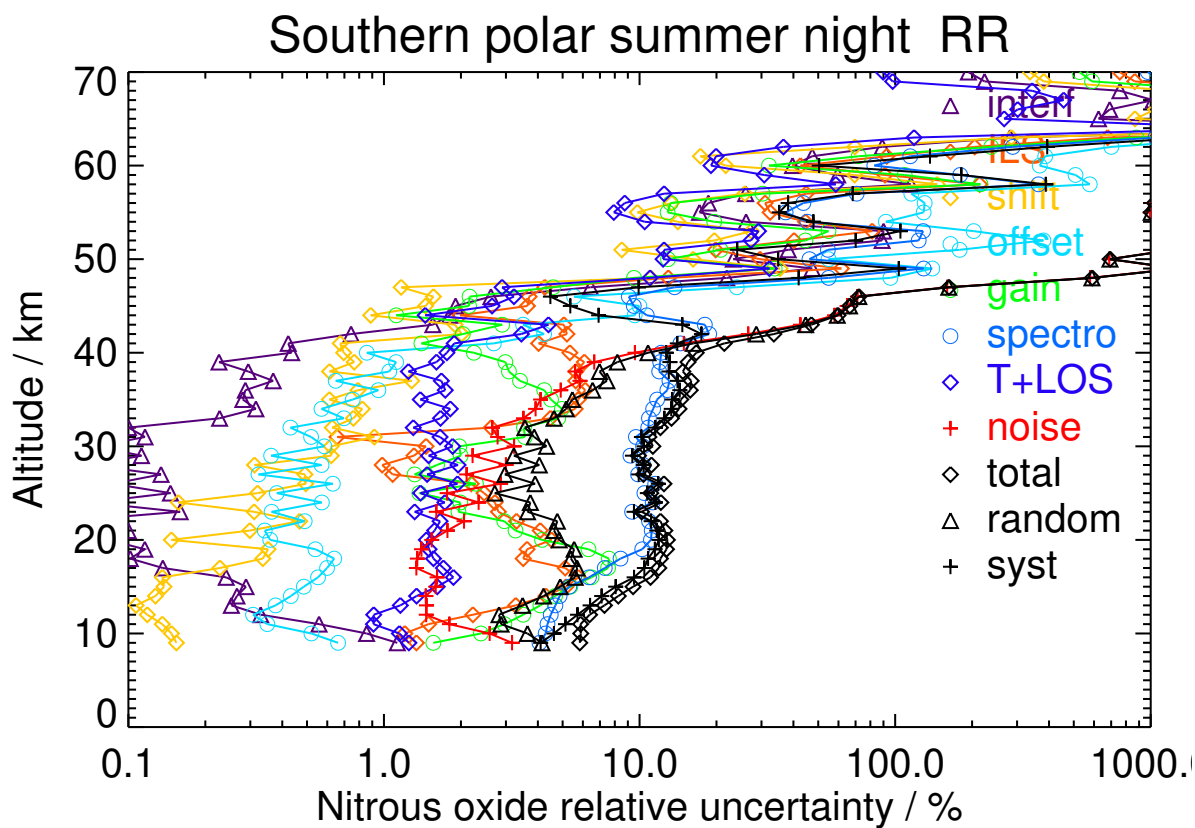

**Figure S202.** V8R\_N2O\_261 Southern polar summer night

**Table S203.** Nitrous oxide error budget for Southern polar autumn day. All uncertainties are  $1\sigma$ .

| altitude<br>(km) | mean target<br>(ppbv) | interf<br>(ppbv) | ILS<br>(ppbv) | shift<br>(ppbv) | offset<br>(ppbv) | gain<br>(ppbv) | spectro<br>(ppbv) | T+LOS<br>(ppbv) | noise<br>(ppbv) | random<br>(ppbv) | syst<br>(ppbv) | total<br>(ppbv) |
|------------------|-----------------------|------------------|---------------|-----------------|------------------|----------------|-------------------|-----------------|-----------------|------------------|----------------|-----------------|
| 12               | 309.987               | 4.628            | 6.199         | 0.192           | 1.028            | 9.890          | 13.770            | 3.264           | 4.816           | 8.215            | 17.740         | 19.550          |
| 15               | 285.655               | 3.768            | 6.804         | 0.297           | 1.352            | 8.277          | 15.778            | 4.808           | 5.233           | 8.803            | 18.785         | 20.745          |
| 18               | 239.379               | 0.325            | 2.849         | 0.709           | 0.870            | 11.586         | 22.128            | 3.868           | 3.729           | 7.125            | 24.728         | 25.734          |
| 21               | 171.486               | 0.343            | 3.724         | 0.285           | 0.790            | 9.778          | 20.683            | 2.555           | 3.368           | 5.764            | 22.864         | 23.579          |
| 24               | 116.691               | 0.130            | 2.764         | 0.296           | 0.754            | 6.016          | 14.485            | 2.539           | 4.179           | 5.778            | 15.647         | 16.680          |
| 27               | 64.207                | 0.111            | 1.480         | 0.136           | 0.302            | 1.747          | 9.731             | 1.382           | 2.558           | 3.505            | 9.809          | 10.417          |
| 30               | 26.898                | 0.039            | 0.353         | 0.113           | 0.398            | 0.777          | 4.585             | 0.885           | 2.381           | 2.836            | 4.509          | 5.327           |
| 33               | 8.813                 | 0.046            | 0.246         | 0.068           | 0.242            | 0.675          | 1.779             | 0.374           | 1.455           | 1.788            | 1.675          | 2.450           |
| 36               | 1.139                 | 0.016            | 0.109         | 0.030           | 0.084            | 0.289          | 0.363             | 0.098           | 0.653           | 0.756            | 0.314          | 0.819           |
| 39               | 0.210                 | 0.010            | 0.031         | 0.011           | 0.038            | 0.103          | 0.102             | 0.029           | 0.446           | 0.471            | 0.037          | 0.473           |
| 42               | 0.167                 | 0.008            | 0.018         | 0.004           | 0.046            | 0.024          | 0.061             | 0.010           | 0.496           | 0.502            | 0.019          | 0.503           |
| 45               | 0.206                 | 0.011            | 0.010         | 0.003           | 0.067            | 0.019          | 0.043             | 0.007           | 0.617           | 0.622            | 0.016          | 0.623           |
| 48               | 0.408                 | 0.015            | 0.017         | 0.006           | 0.095            | 0.045          | 0.052             | 0.011           | 0.739           | 0.747            | 0.044          | 0.749           |
| 52               | 0.512                 | 0.019            | 0.021         | 0.008           | 0.099            | 0.043          | 0.070             | 0.012           | 0.886           | 0.894            | 0.053          | 0.895           |
| 56               | 0.123                 | 0.015            | 0.021         | 0.011           | 0.121            | 0.070          | 0.053             | 0.017           | 1.161           | 1.169            | 0.070          | 1.171           |
| 60               | 0.642                 | 0.012            | 0.027         | 0.011           | 0.210            | 0.065          | 0.058             | 0.018           | 1.447           | 1.463            | 0.067          | 1.465           |
| 64               | 0.142                 | 0.013            | 0.030         | 0.008           | 0.336            | 0.062          | 0.054             | 0.017           | 1.771           | 1.804            | 0.045          | 1.805           |
| 68               | -0.523                | 0.013            | 0.031         | 0.006           | 0.356            | 0.098          | 0.050             | 0.019           | 1.738           | 1.776            | 0.075          | 1.778           |

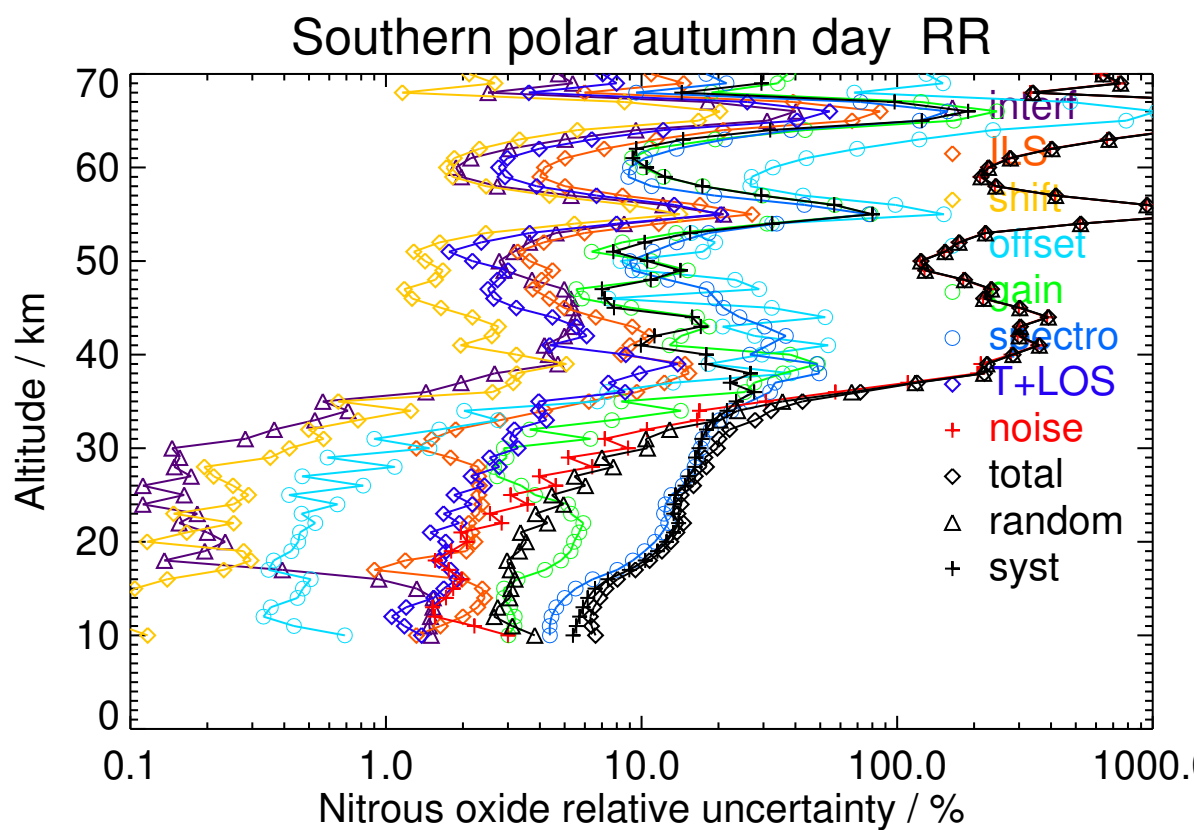

**Figure S203.** V8R\_N2O\_261 Southern polar autumn day

**Table S204.** Nitrous oxide error budget for Southern polar autumn night. All uncertainties are  $1\sigma$ .

| altitude<br>(km) | mean target<br>(ppbv) | interf<br>(ppbv) | ILS<br>(ppbv) | shift<br>(ppbv) | offset<br>(ppbv) | gain<br>(ppbv) | spectro<br>(ppbv) | T+LOS<br>(ppbv) | noise<br>(ppbv) | random<br>(ppbv) | syst<br>(ppbv) | total<br>(ppbv) |
|------------------|-----------------------|------------------|---------------|-----------------|------------------|----------------|-------------------|-----------------|-----------------|------------------|----------------|-----------------|
| 9                | 316.825               | 3.678            | 3.261         | 0.362           | 2.276            | 9.970          | 13.591            | 4.499           | 10.039          | 13.141           | 16.184         | 20.847          |
| 12               | 309.142               | 3.930            | 5.851         | 0.164           | 1.103            | 10.770         | 13.361            | 3.409           | 4.732           | 8.290            | 17.627         | 19.479          |
| 15               | 278.013               | 2.974            | 6.770         | 0.276           | 1.493            | 10.414         | 15.285            | 5.290           | 5.457           | 9.554            | 19.119         | 21.373          |
| 18               | 220.204               | 0.393            | 3.373         | 0.439           | 1.175            | 14.166         | 18.248            | 4.314           | 3.847           | 8.585            | 22.505         | 24.087          |
| 21               | 151.590               | 0.346            | 2.762         | 0.305           | 0.876            | 10.022         | 16.416            | 2.629           | 3.487           | 6.587            | 18.821         | 19.940          |
| 24               | 101.342               | 0.096            | 2.943         | 0.266           | 0.762            | 5.019          | 12.511            | 2.441           | 4.144           | 5.753            | 13.456         | 14.634          |
| 27               | 52.323                | 0.100            | 1.467         | 0.124           | 0.309            | 1.461          | 8.085             | 1.294           | 2.413           | 3.273            | 8.159          | 8.791           |
| 30               | 19.293                | 0.057            | 0.440         | 0.072           | 0.373            | 0.705          | 3.680             | 0.705           | 2.113           | 2.607            | 3.543          | 4.399           |
| 33               | 5.190                 | 0.027            | 0.222         | 0.045           | 0.207            | 0.719          | 1.175             | 0.241           | 1.159           | 1.552            | 0.993          | 1.842           |
| 36               | 0.599                 | 0.010            | 0.074         | 0.015           | 0.081            | 0.175          | 0.261             | 0.074           | 0.585           | 0.662            | 0.145          | 0.677           |
| 39               | 0.234                 | 0.007            | 0.021         | 0.007           | 0.047            | 0.088          | 0.074             | 0.023           | 0.451           | 0.465            | 0.054          | 0.469           |
| 42               | 0.103                 | 0.009            | 0.015         | 0.004           | 0.055            | 0.029          | 0.051             | 0.010           | 0.517           | 0.523            | 0.025          | 0.523           |
| 45               | 0.159                 | 0.012            | 0.007         | 0.004           | 0.072            | 0.028          | 0.040             | 0.008           | 0.638           | 0.644            | 0.028          | 0.644           |
| 48               | 0.715                 | 0.017            | 0.016         | 0.006           | 0.096            | 0.051          | 0.061             | 0.013           | 0.751           | 0.760            | 0.051          | 0.762           |
| 52               | 0.464                 | 0.020            | 0.019         | 0.008           | 0.103            | 0.063          | 0.062             | 0.015           | 0.908           | 0.917            | 0.062          | 0.919           |
| 56               | 0.341                 | 0.016            | 0.016         | 0.010           | 0.119            | 0.095          | 0.050             | 0.021           | 1.152           | 1.161            | 0.087          | 1.164           |
| 60               | 0.203                 | 0.012            | 0.019         | 0.008           | 0.195            | 0.060          | 0.042             | 0.015           | 1.388           | 1.403            | 0.047          | 1.403           |
| 64               | -0.435                | 0.014            | 0.036         | 0.006           | 0.322            | 0.135          | 0.046             | 0.024           | 1.725           | 1.758            | 0.098          | 1.761           |
| 68               | -0.454                | 0.014            | 0.040         | 0.005           | 0.343            | 0.140          | 0.038             | 0.025           | 1.704           | 1.741            | 0.114          | 1.745           |

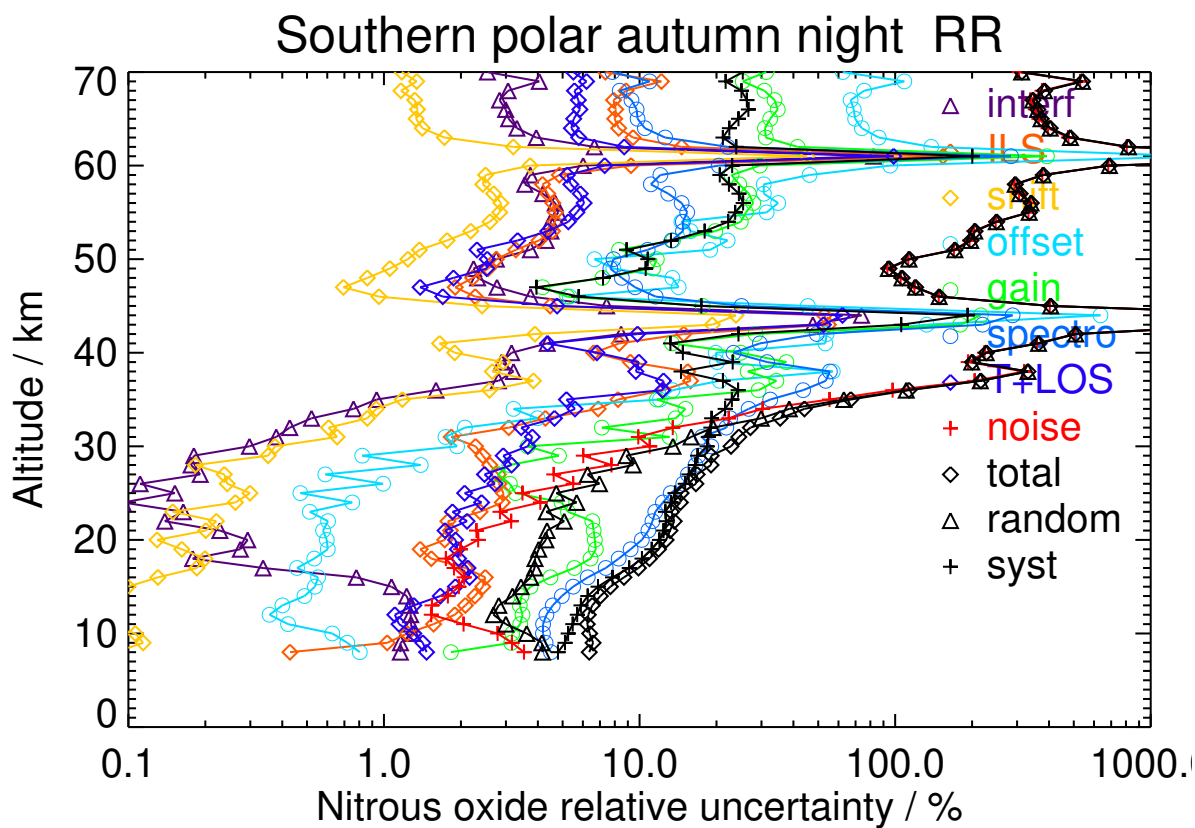

**Figure S204.** V8R\_N2O\_261 Southern polar autumn night



**Table S205.** Nitrous oxide error budget for Northern polar winter day. All uncertainties are  $1\sigma$ .

| altitude (km) | mean target (ppbv) | NLTE (ppbv) | interf (ppbv) | ILS (ppbv) | shift (ppbv) | offset (ppbv) | gain (ppbv) | spectro (ppbv) | T+LOS (ppbv) | noise (ppbv) | random (ppbv) | syst (ppbv) | total (ppbv) |
|---------------|--------------------|-------------|---------------|------------|--------------|---------------|-------------|----------------|--------------|--------------|---------------|-------------|--------------|
| 30            | 90.006             | <0.001      | 0.195         | 1.839      | 0.336        | 0.984         | 8.112       | 11.479         | 1.416        | 2.162        | 5.788         | 13.238      | 14.448       |
| 35            | 26.464             | <0.001      | 0.077         | 0.646      | 0.062        | 0.185         | 0.962       | 4.091          | 0.477        | 1.412        | 2.479         | 3.768       | 4.511        |
| 40            | 7.617              | <0.001      | 0.023         | 0.131      | 0.016        | 0.136         | 0.206       | 0.756          | 0.103        | 1.023        | 1.124         | 0.665       | 1.306        |
| 45            | 3.501              | <0.001      | 0.014         | 0.077      | 0.012        | 0.051         | 0.124       | 0.382          | 0.046        | 0.858        | 0.874         | 0.381       | 0.953        |
| 50            | 0.249              | <0.001      | 0.017         | 0.039      | 0.012        | 0.078         | 0.069       | 0.094          | 0.017        | 1.025        | 1.031         | 0.098       | 1.035        |
| 55            | 0.585              | <0.001      | 0.017         | 0.012      | 0.005        | 0.165         | 0.029       | 0.052          | 0.012        | 1.339        | 1.351         | 0.029       | 1.351        |
| 60            | 0.460              | <0.001      | 0.017         | 0.041      | 0.013        | 0.337         | 0.108       | 0.053          | 0.019        | 1.717        | 1.752         | 0.092       | 1.755        |
| 65            | 0.258              | <0.001      | 0.016         | 0.048      | 0.016        | 0.333         | 0.107       | 0.044          | 0.017        | 1.480        | 1.520         | 0.096       | 1.523        |

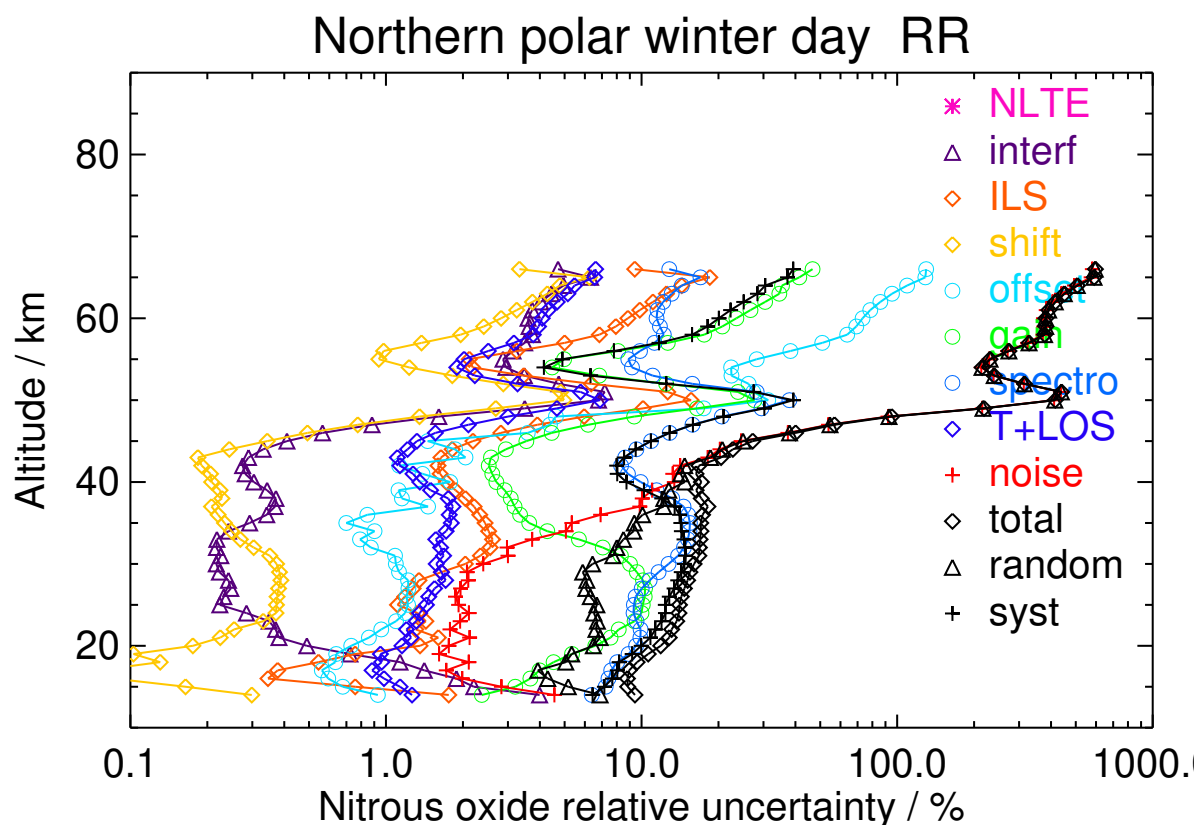

**Figure S205.** V8R\_N2O\_561 Northern polar winter day



**Table S206.** Nitrous oxide error budget for Northern polar winter night. All uncertainties are  $1\sigma$ .

| altitude (km) | mean target (ppbv) | NLTE (ppbv) | interf (ppbv) | ILS (ppbv) | shift (ppbv) | offset (ppbv) | gain (ppbv) | spectro (ppbv) | T+LOS (ppbv) | noise (ppbv) | random (ppbv) | syst (ppbv) | total (ppbv) |
|---------------|--------------------|-------------|---------------|------------|--------------|---------------|-------------|----------------|--------------|--------------|---------------|-------------|--------------|
| 30            | 28.127             | <0.001      | 0.097         | 1.060      | 0.132        | 0.450         | 3.628       | 6.954          | 0.534        | 1.399        | 6.521         | 4.754       | 8.070        |
| 35            | 10.466             | <0.001      | 0.047         | 0.343      | 0.033        | 0.140         | 0.694       | 2.074          | 0.175        | 0.957        | 2.099         | 1.211       | 2.423        |
| 40            | 3.002              | <0.001      | 0.018         | 0.095      | 0.012        | 0.112         | 0.108       | 0.717          | 0.050        | 0.809        | 1.020         | 0.407       | 1.098        |
| 45            | 1.073              | <0.001      | 0.013         | 0.021      | 0.004        | 0.050         | 0.033       | 0.149          | 0.016        | 0.704        | 0.717         | 0.090       | 0.723        |
| 50            | 0.388              | <0.001      | 0.018         | 0.017      | 0.006        | 0.069         | 0.028       | 0.073          | 0.011        | 0.876        | 0.882         | 0.039       | 0.883        |
| 55            | 0.478              | <0.001      | 0.016         | 0.019      | 0.009        | 0.125         | 0.062       | 0.048          | 0.012        | 1.180        | 1.189         | 0.041       | 1.189        |
| 60            | 0.516              | <0.001      | 0.011         | 0.021      | 0.009        | 0.259         | 0.059       | 0.045          | 0.014        | 1.464        | 1.488         | 0.044       | 1.489        |
| 65            | -0.028             | <0.001      | 0.011         | 0.021      | 0.006        | 0.298         | 0.022       | 0.030          | 0.008        | 1.423        | 1.454         | 0.021       | 1.454        |
| 70            | 0.805              | <0.001      | 0.007         | 0.002      | 0.002        | 0.233         | 0.009       | 0.021          | 0.004        | 1.019        | 1.045         | 0.023       | 1.046        |

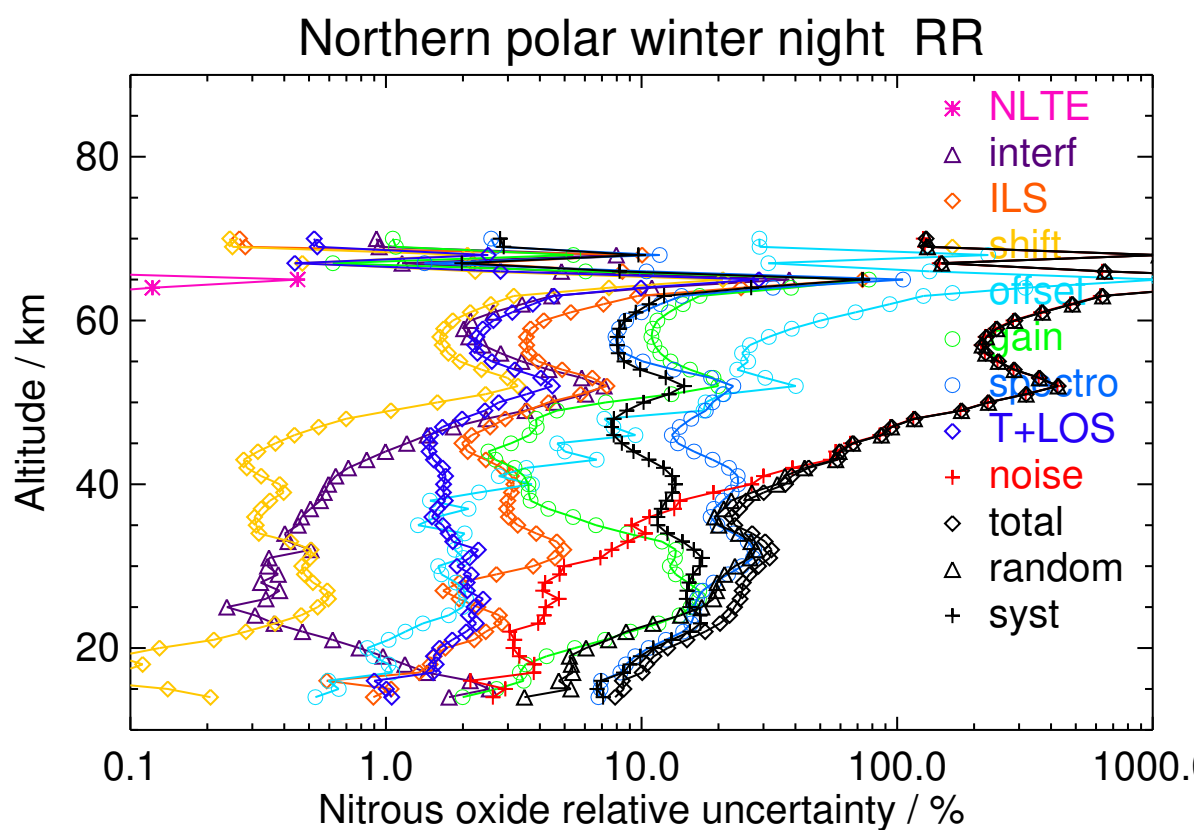

**Figure S206.** V8R\_N2O\_561 Northern polar winter night

**Table S207.** Nitrous oxide error budget for Northern polar spring day. All uncertainties are  $1\sigma$ .

| altitude (km) | mean target (ppbv) | NLTE (ppbv) | interf (ppbv) | ILS (ppbv) | shift (ppbv) | offset (ppbv) | gain (ppbv) | spectro (ppbv) | T+LOS (ppbv) | noise (ppbv) | random (ppbv) | syst (ppbv) | total (ppbv) |
|---------------|--------------------|-------------|---------------|------------|--------------|---------------|-------------|----------------|--------------|--------------|---------------|-------------|--------------|
| 30            | 56.373             | <0.001      | 0.079         | 0.967      | 0.264        | 0.433         | 1.561       | 7.191          | 1.233        | 2.132        | 3.325         | 7.097       | 7.837        |
| 35            | 12.630             | <0.001      | 0.069         | 0.350      | 0.053        | 0.123         | 0.220       | 1.703          | 0.316        | 1.013        | 1.151         | 1.702       | 2.055        |
| 40            | 3.008              | <0.001      | 0.011         | 0.058      | 0.009        | 0.079         | 0.067       | 0.301          | 0.046        | 0.470        | 0.495         | 0.287       | 0.573        |
| 45            | 0.577              | <0.001      | 0.011         | 0.015      | 0.004        | 0.055         | 0.018       | 0.075          | 0.010        | 0.433        | 0.443         | 0.027       | 0.444        |
| 50            | 0.568              | <0.001      | 0.016         | 0.021      | 0.004        | 0.026         | 0.015       | 0.065          | 0.009        | 0.498        | 0.502         | 0.044       | 0.504        |
| 55            | 0.323              | <0.001      | 0.017         | 0.017      | 0.006        | 0.090         | 0.010       | 0.038          | 0.007        | 0.881        | 0.887         | 0.024       | 0.887        |
| 60            | 0.845              | <0.001      | 0.012         | 0.029      | 0.005        | 0.138         | 0.021       | 0.052          | 0.010        | 1.071        | 1.081         | 0.041       | 1.082        |
| 65            | 1.266              | <0.001      | 0.023         | 0.098      | 0.011        | 0.249         | 0.028       | 0.054          | 0.012        | 1.332        | 1.358         | 0.083       | 1.361        |
| 70            | 0.829              | <0.001      | 0.010         | 0.005      | 0.002        | 0.218         | 0.006       | 0.020          | 0.005        | 1.011        | 1.034         | 0.021       | 1.035        |

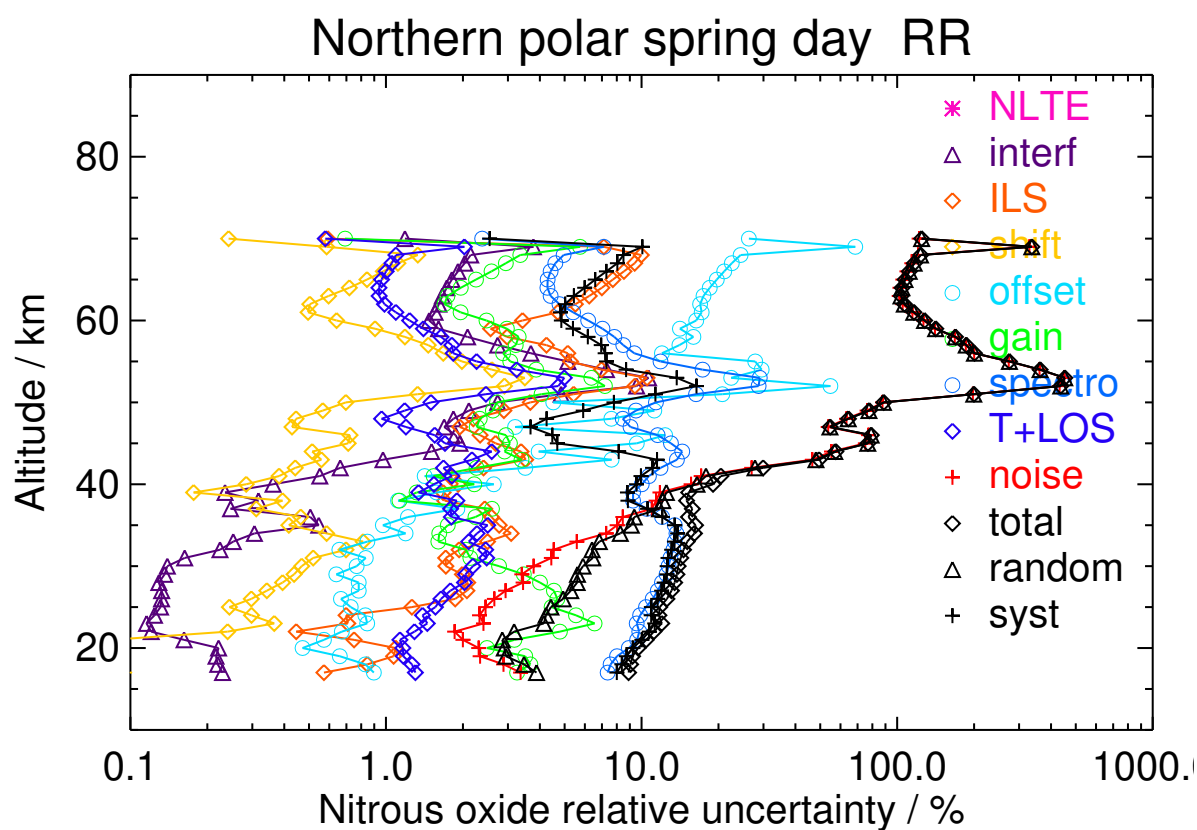

**Figure S207.** V8R\_N2O\_561 Northern polar spring day

**Table S208.** Nitrous oxide error budget for Northern polar spring night. All uncertainties are  $1\sigma$ .

| altitude (km) | mean target (ppbv) | NLTE (ppbv) | interf (ppbv) | ILS (ppbv) | shift (ppbv) | offset (ppbv) | gain (ppbv) | spectro (ppbv) | T+LOS (ppbv) | noise (ppbv) | random (ppbv) | syst (ppbv) | total (ppbv) |
|---------------|--------------------|-------------|---------------|------------|--------------|---------------|-------------|----------------|--------------|--------------|---------------|-------------|--------------|
| 30            | 57.705             | <0.001      | 0.076         | 0.963      | 0.266        | 0.410         | 1.201       | 7.246          | 1.204        | 2.073        | 3.192         | 7.119       | 7.802        |
| 35            | 15.230             | <0.001      | 0.077         | 0.434      | 0.057        | 0.124         | 0.202       | 2.081          | 0.346        | 1.010        | 1.167         | 2.088       | 2.392        |
| 40            | 3.827              | <0.001      | 0.012         | 0.055      | 0.010        | 0.081         | 0.077       | 0.314          | 0.049        | 0.472        | 0.502         | 0.295       | 0.583        |
| 45            | 0.715              | <0.001      | 0.011         | 0.023      | 0.005        | 0.052         | 0.027       | 0.105          | 0.014        | 0.427        | 0.439         | 0.070       | 0.445        |
| 50            | 0.610              | <0.001      | 0.016         | 0.018      | 0.004        | 0.032         | 0.013       | 0.068          | 0.008        | 0.511        | 0.516         | 0.033       | 0.517        |
| 55            | 0.314              | <0.001      | 0.017         | 0.021      | 0.007        | 0.092         | 0.013       | 0.046          | 0.008        | 0.904        | 0.910         | 0.030       | 0.910        |
| 60            | 0.383              | <0.001      | 0.013         | 0.029      | 0.006        | 0.146         | 0.020       | 0.041          | 0.009        | 1.097        | 1.108         | 0.028       | 1.108        |
| 65            | 0.294              | <0.001      | 0.022         | 0.091      | 0.011        | 0.255         | 0.021       | 0.041          | 0.008        | 1.346        | 1.372         | 0.070       | 1.374        |

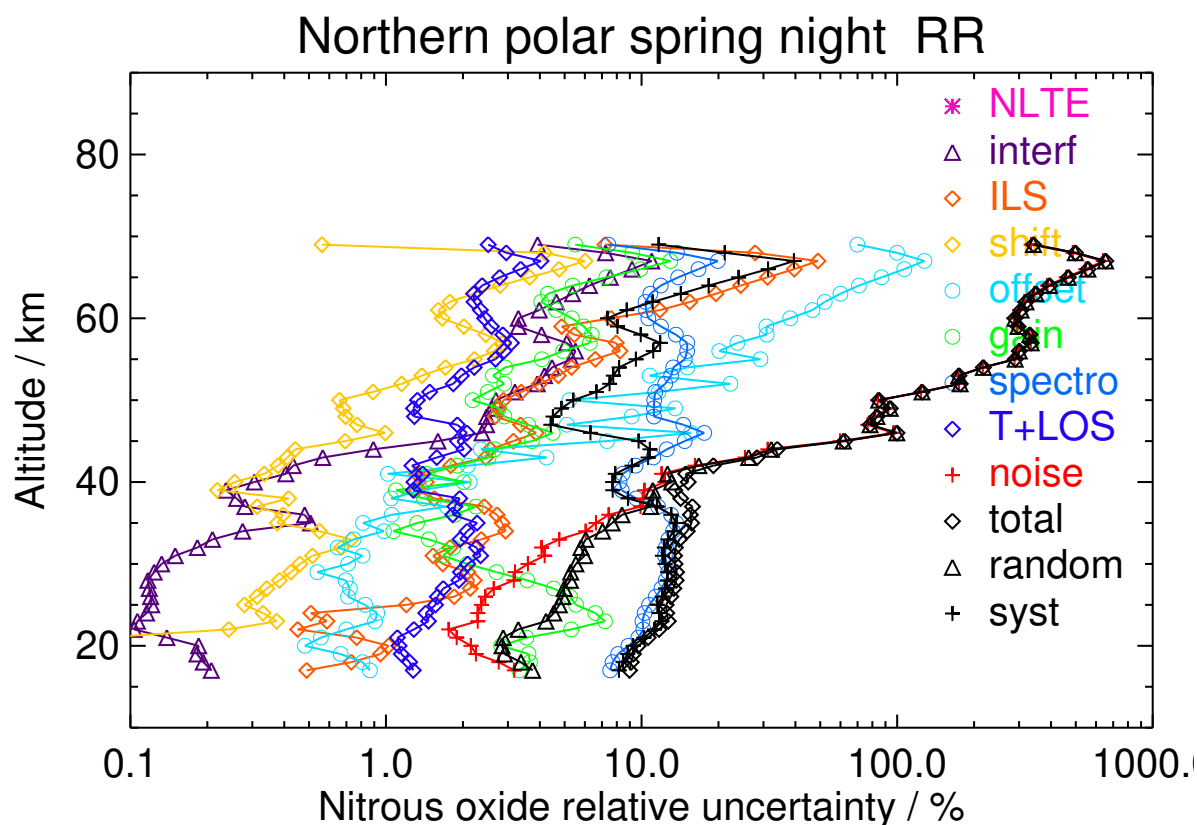

**Figure S208.** V8R\_N2O\_561 Northern polar spring night

**Table S209.** Nitrous oxide error budget for Northern polar summer day. All uncertainties are  $1\sigma$ .

| altitude (km) | mean target (ppbv) | NLTE (ppbv) | interf (ppbv) | ILS (ppbv) | shift (ppbv) | offset (ppbv) | gain (ppbv) | spectro (ppbv) | T+LOS (ppbv) | noise (ppbv) | random (ppbv) | syst (ppbv) | total (ppbv) |
|---------------|--------------------|-------------|---------------|------------|--------------|---------------|-------------|----------------|--------------|--------------|---------------|-------------|--------------|
| 30            | 77.297             | <0.001      | 0.141         | 1.024      | 0.233        | 0.630         | 3.383       | 7.850          | 1.419        | 1.639        | 2.477         | 8.553       | 8.904        |
| 35            | 21.594             | <0.001      | 0.136         | 0.452      | 0.194        | 0.148         | 0.428       | 2.330          | 0.412        | 0.827        | 1.042         | 2.380       | 2.598        |
| 40            | 3.083              | <0.001      | 0.020         | 0.012      | 0.014        | 0.056         | 0.065       | 0.311          | 0.056        | 0.308        | 0.337         | 0.298       | 0.450        |
| 45            | 0.548              | <0.001      | 0.009         | 0.015      | 0.006        | 0.038         | 0.013       | 0.055          | 0.011        | 0.271        | 0.275         | 0.051       | 0.280        |
| 50            | 0.168              | <0.001      | 0.013         | 0.007      | 0.003        | 0.018         | 0.009       | 0.027          | 0.006        | 0.319        | 0.321         | 0.013       | 0.321        |
| 55            | -0.045             | <0.001      | 0.020         | 0.010      | 0.004        | 0.091         | 0.007       | 0.033          | 0.008        | 0.687        | 0.694         | 0.012       | 0.694        |
| 60            | 0.413              | <0.001      | 0.011         | 0.022      | 0.012        | 0.095         | 0.018       | 0.047          | 0.010        | 0.839        | 0.845         | 0.040       | 0.846        |
| 65            | 1.222              | <0.001      | 0.032         | 0.118      | 0.025        | 0.192         | 0.051       | 0.077          | 0.015        | 1.151        | 1.169         | 0.144       | 1.178        |
| 70            | 0.871              | <0.001      | 0.030         | 0.144      | 0.035        | 0.175         | 0.065       | 0.084          | 0.014        | 0.932        | 0.950         | 0.176       | 0.966        |

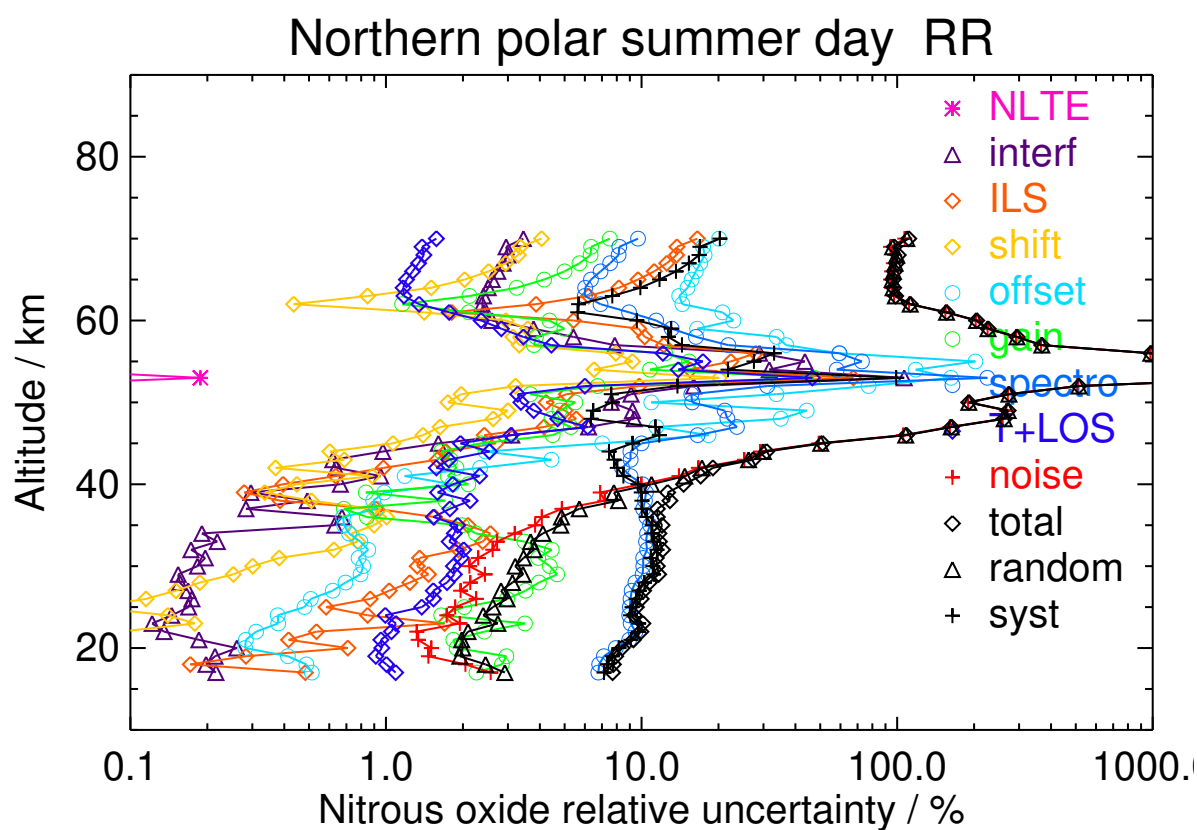

**Figure S209.** V8R\_N2O\_561 Northern polar summer day

**Table S210.** Nitrous oxide error budget for Northern polar summer night. All uncertainties are  $1\sigma$ .

| altitude (km) | mean target (ppbv) | NLTE (ppbv) | interf (ppbv) | ILS (ppbv) | shift (ppbv) | offset (ppbv) | gain (ppbv) | spectro (ppbv) | T+LOS (ppbv) | noise (ppbv) | random (ppbv) | syst (ppbv) | total (ppbv) |
|---------------|--------------------|-------------|---------------|------------|--------------|---------------|-------------|----------------|--------------|--------------|---------------|-------------|--------------|
| 30            | 61.095             | <0.001      | 0.101         | 1.082      | 0.292        | 0.545         | 2.415       | 7.349          | 1.223        | 1.620        | 2.377         | 7.737       | 8.094        |
| 35            | 10.143             | <0.001      | 0.055         | 0.284      | 0.070        | 0.128         | 0.396       | 1.533          | 0.285        | 0.794        | 0.946         | 1.558       | 1.823        |
| 40            | 1.062              | <0.001      | 0.011         | 0.010      | 0.011        | 0.056         | 0.045       | 0.137          | 0.026        | 0.323        | 0.337         | 0.127       | 0.360        |
| 45            | 0.175              | <0.001      | 0.009         | 0.010      | 0.003        | 0.048         | 0.011       | 0.033          | 0.007        | 0.349        | 0.354         | 0.021       | 0.354        |
| 50            | 0.155              | <0.001      | 0.015         | 0.007      | 0.002        | 0.025         | 0.008       | 0.027          | 0.005        | 0.435        | 0.436         | 0.010       | 0.437        |
| 55            | 0.137              | <0.001      | 0.019         | 0.014      | 0.006        | 0.094         | 0.014       | 0.040          | 0.008        | 0.851        | 0.857         | 0.027       | 0.857        |
| 60            | 0.287              | <0.001      | 0.014         | 0.014      | 0.009        | 0.132         | 0.012       | 0.045          | 0.009        | 1.022        | 1.031         | 0.028       | 1.031        |
| 65            | 0.055              | <0.001      | 0.025         | 0.097      | 0.013        | 0.241         | 0.100       | 0.051          | 0.020        | 1.319        | 1.342         | 0.142       | 1.349        |

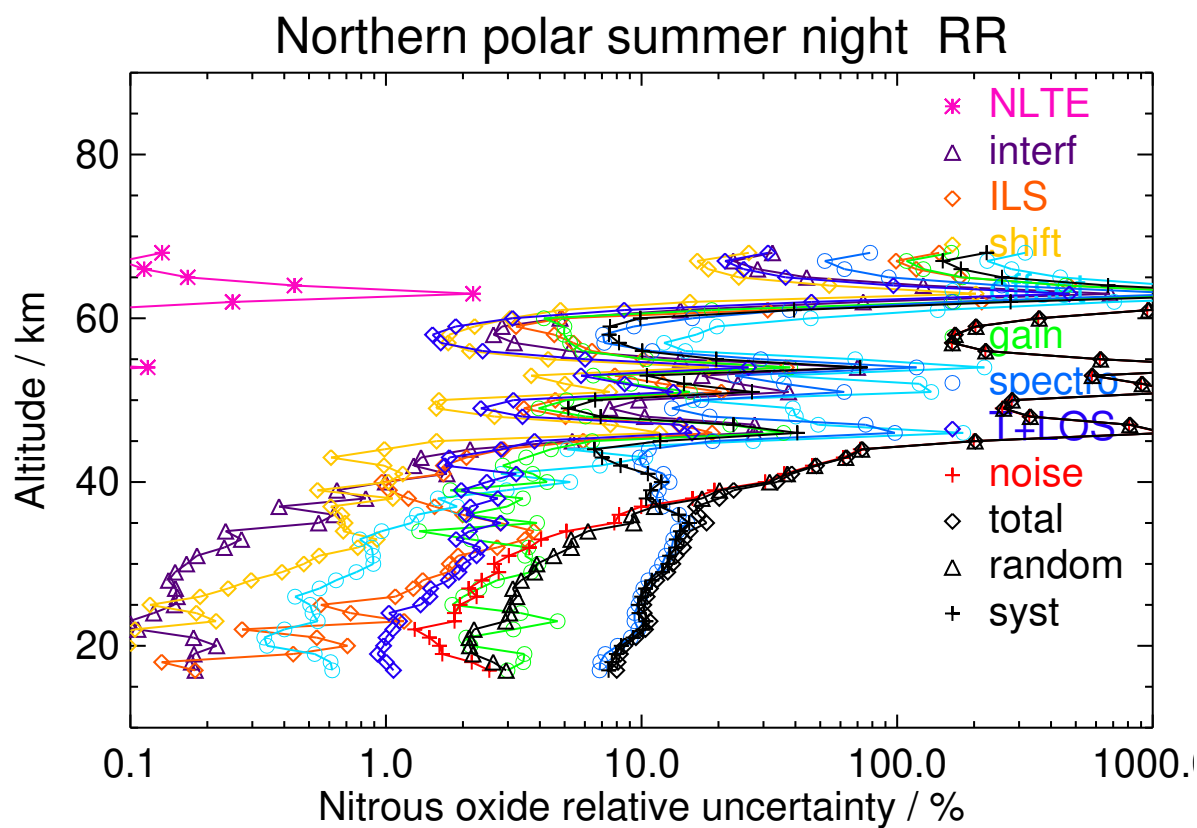

**Figure S210.** V8R\_N2O\_561 Northern polar summer night

**Table S211.** Nitrous oxide error budget for Northern polar autumn day. All uncertainties are  $1\sigma$ .

| altitude (km) | mean target (ppbv) | NLTE (ppbv) | interf (ppbv) | ILS (ppbv) | shift (ppbv) | offset (ppbv) | gain (ppbv) | spectro (ppbv) | T+LOS (ppbv) | noise (ppbv) | random (ppbv) | syst (ppbv) | total (ppbv) |
|---------------|--------------------|-------------|---------------|------------|--------------|---------------|-------------|----------------|--------------|--------------|---------------|-------------|--------------|
| 30            | 31.905             | <0.001      | 0.141         | 1.076      | 0.193        | 0.303         | 0.940       | 5.789          | 0.826        | 1.613        | 3.045         | 5.451       | 6.244        |
| 35            | 2.286              | <0.001      | 0.059         | 0.118      | 0.054        | 0.093         | 0.406       | 0.604          | 0.145        | 0.688        | 0.938         | 0.416       | 1.026        |
| 40            | 0.841              | <0.001      | 0.012         | 0.042      | 0.012        | 0.083         | 0.088       | 0.247          | 0.021        | 0.525        | 0.589         | 0.078       | 0.594        |
| 45            | 0.542              | <0.001      | 0.012         | 0.035      | 0.005        | 0.057         | 0.042       | 0.152          | 0.011        | 0.566        | 0.589         | 0.046       | 0.591        |
| 50            | 0.582              | <0.001      | 0.018         | 0.018      | 0.006        | 0.044         | 0.017       | 0.064          | 0.010        | 0.695        | 0.700         | 0.029       | 0.700        |
| 55            | 0.729              | <0.001      | 0.020         | 0.021      | 0.009        | 0.085         | 0.031       | 0.062          | 0.012        | 1.029        | 1.034         | 0.046       | 1.035        |
| 60            | 0.941              | <0.001      | 0.015         | 0.024      | 0.010        | 0.196         | 0.023       | 0.061          | 0.014        | 1.294        | 1.310         | 0.045       | 1.311        |
| 65            | 0.508              | <0.001      | 0.014         | 0.040      | 0.007        | 0.279         | 0.049       | 0.045          | 0.015        | 1.417        | 1.445         | 0.061       | 1.446        |
| 70            | -0.100             | <0.001      | 0.009         | 0.019      | 0.003        | 0.218         | 0.027       | 0.020          | 0.008        | 1.015        | 1.038         | 0.035       | 1.038        |

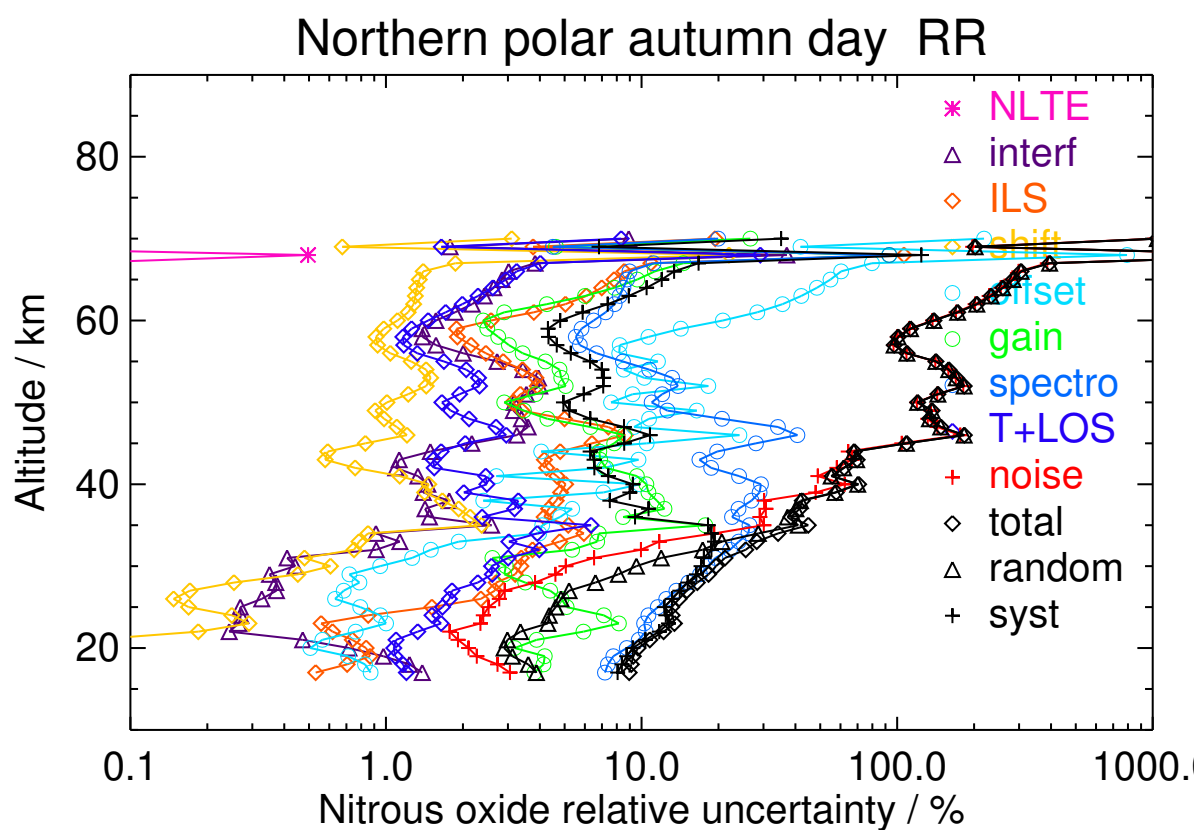

**Figure S211.** V8R\_N2O\_561 Northern polar autumn day

**Table S212.** Nitrous oxide error budget for Northern polar autumn night. All uncertainties are  $1\sigma$ .

| altitude (km) | mean target (ppbv) | NLTE (ppbv) | interf (ppbv) | ILS (ppbv) | shift (ppbv) | offset (ppbv) | gain (ppbv) | spectro (ppbv) | T+LOS (ppbv) | noise (ppbv) | random (ppbv) | syst (ppbv) | total (ppbv) |
|---------------|--------------------|-------------|---------------|------------|--------------|---------------|-------------|----------------|--------------|--------------|---------------|-------------|--------------|
| 30            | 22.468             | <0.001      | 0.093         | 1.076      | 0.150        | 0.246         | 0.836       | 4.720          | 0.683        | 1.548        | 2.089         | 4.767       | 5.204        |
| 35            | 0.960              | <0.001      | 0.037         | 0.066      | 0.027        | 0.072         | 0.236       | 0.184          | 0.093        | 0.606        | 0.672         | 0.160       | 0.691        |
| 40            | -0.023             | <0.001      | 0.008         | 0.010      | 0.002        | 0.089         | 0.021       | 0.051          | 0.009        | 0.573        | 0.583         | 0.010       | 0.583        |
| 45            | 0.081              | <0.001      | 0.011         | 0.008      | 0.004        | 0.040         | 0.020       | 0.033          | 0.006        | 0.555        | 0.558         | 0.019       | 0.558        |
| 50            | 0.706              | <0.001      | 0.018         | 0.013      | 0.006        | 0.058         | 0.022       | 0.054          | 0.008        | 0.729        | 0.733         | 0.033       | 0.734        |
| 55            | 0.684              | <0.001      | 0.019         | 0.024      | 0.009        | 0.081         | 0.031       | 0.055          | 0.011        | 1.034        | 1.038         | 0.050       | 1.040        |
| 60            | 0.322              | <0.001      | 0.013         | 0.010      | 0.010        | 0.189         | 0.034       | 0.045          | 0.012        | 1.258        | 1.273         | 0.041       | 1.273        |
| 65            | 0.101              | <0.001      | 0.013         | 0.025      | 0.006        | 0.277         | 0.026       | 0.028          | 0.008        | 1.406        | 1.433         | 0.028       | 1.434        |
| 70            | -0.485             | <0.001      | 0.008         | 0.021      | 0.003        | 0.214         | 0.017       | 0.008          | 0.004        | 0.971        | 0.994         | 0.025       | 0.994        |

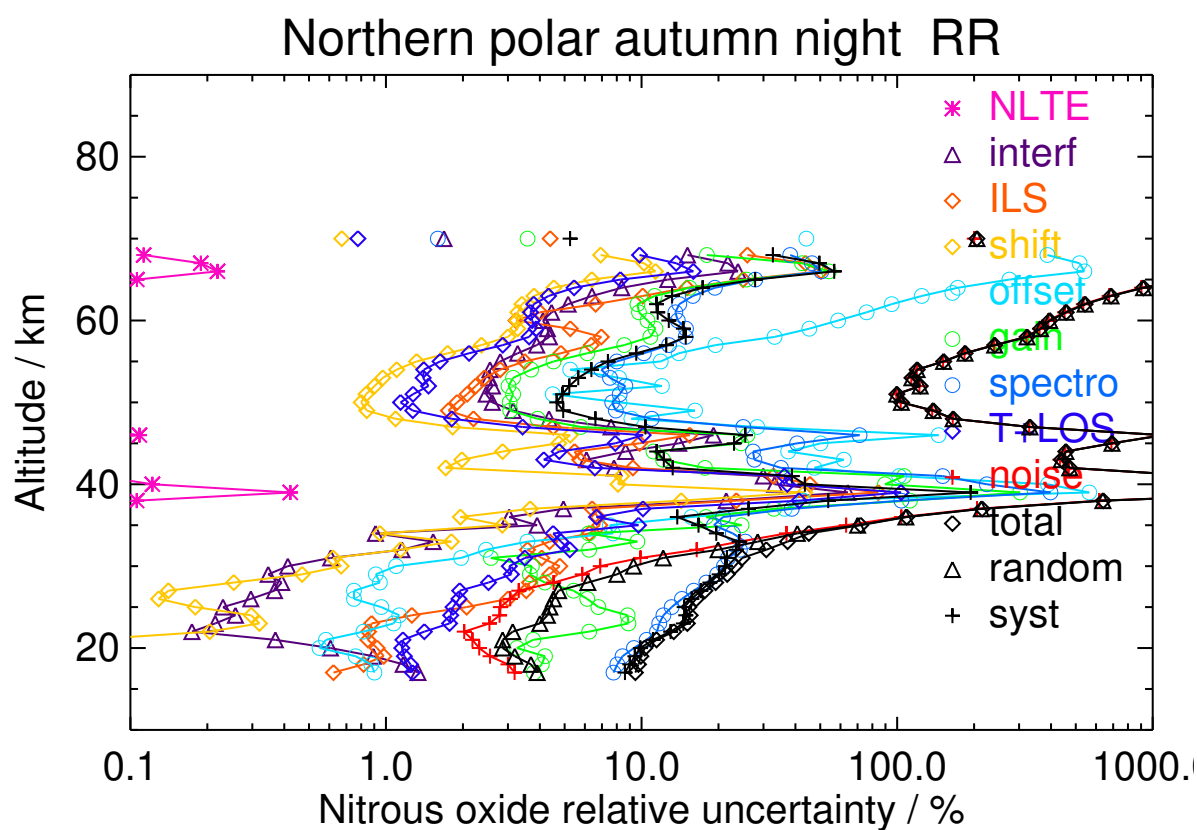

**Figure S212.** V8R\_N2O\_561 Northern polar autumn night

**Table S213.** Nitrous oxide error budget for Northern midlatitude winter day. All uncertainties are  $1\sigma$ .

| altitude (km) | mean target (ppbv) | NLTE (ppbv) | interf (ppbv) | ILS (ppbv) | shift (ppbv) | offset (ppbv) | gain (ppbv) | spectro (ppbv) | T+LOS (ppbv) | noise (ppbv) | random (ppbv) | syst (ppbv) | total (ppbv) |
|---------------|--------------------|-------------|---------------|------------|--------------|---------------|-------------|----------------|--------------|--------------|---------------|-------------|--------------|
| 30            | 80.838             | <0.001      | 0.194         | 1.671      | 0.259        | 0.622         | 3.248       | 9.720          | 1.399        | 2.047        | 5.084         | 9.413       | 10.698       |
| 35            | 30.470             | <0.001      | 0.137         | 0.466      | 0.167        | 0.182         | 0.385       | 3.872          | 0.491        | 1.217        | 2.191         | 3.515       | 4.142        |
| 40            | 7.838              | <0.001      | 0.030         | 0.120      | 0.029        | 0.125         | 0.160       | 0.631          | 0.091        | 0.775        | 0.889         | 0.522       | 1.031        |
| 45            | 4.459              | <0.001      | 0.014         | 0.081      | 0.013        | 0.040         | 0.099       | 0.455          | 0.043        | 0.555        | 0.594         | 0.427       | 0.732        |
| 50            | 0.505              | <0.001      | 0.016         | 0.025      | 0.007        | 0.060         | 0.020       | 0.088          | 0.014        | 0.692        | 0.700         | 0.041       | 0.701        |
| 55            | 0.323              | <0.001      | 0.015         | 0.022      | 0.011        | 0.087         | 0.022       | 0.055          | 0.009        | 1.033        | 1.038         | 0.036       | 1.039        |
| 60            | -0.057             | <0.001      | 0.021         | 0.046      | 0.008        | 0.211         | 0.046       | 0.051          | 0.012        | 1.331        | 1.349         | 0.056       | 1.350        |
| 65            | -0.100             | <0.001      | 0.038         | 0.088      | 0.022        | 0.286         | 0.089       | 0.067          | 0.017        | 1.421        | 1.452         | 0.118       | 1.457        |
| 70            | 1.172              | <0.001      | 0.030         | 0.061      | 0.016        | 0.235         | 0.016       | 0.062          | 0.010        | 1.040        | 1.068         | 0.067       | 1.071        |

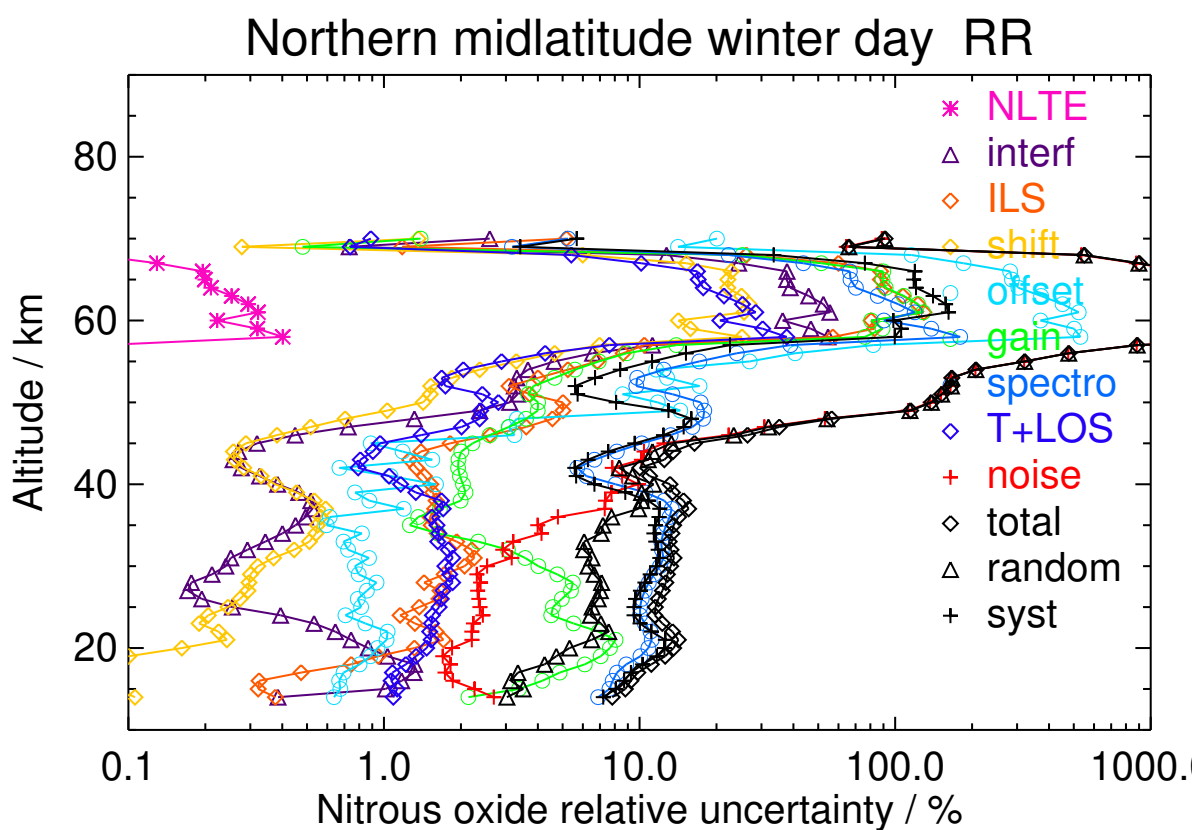

**Figure S213.** V8R\_N2O\_561 Northern midlatitude winter day



**Table S214.** Nitrous oxide error budget for Northern midlatitude winter night. All uncertainties are  $1\sigma$ .

| altitude (km) | mean target (ppbv) | NLTE (ppbv) | interf (ppbv) | ILS (ppbv) | shift (ppbv) | offset (ppbv) | gain (ppbv) | spectro (ppbv) | T+LOS (ppbv) | noise (ppbv) | random (ppbv) | syst (ppbv) | total (ppbv) |
|---------------|--------------------|-------------|---------------|------------|--------------|---------------|-------------|----------------|--------------|--------------|---------------|-------------|--------------|
| 30            | 88.715             | <0.001      | 0.188         | 2.052      | 0.313        | 0.714         | 5.110       | 10.676         | 1.508        | 2.055        | 6.267         | 10.591      | 12.306       |
| 35            | 29.272             | <0.001      | 0.139         | 0.777      | 0.184        | 0.247         | 0.887       | 4.463          | 0.527        | 1.398        | 2.593         | 4.115       | 4.864        |
| 40            | 8.273              | <0.001      | 0.031         | 0.134      | 0.035        | 0.081         | 0.187       | 0.652          | 0.092        | 0.676        | 0.824         | 0.523       | 0.976        |
| 45            | 5.098              | <0.001      | 0.015         | 0.091      | 0.014        | 0.061         | 0.098       | 0.476          | 0.052        | 0.560        | 0.602         | 0.449       | 0.751        |
| 50            | 1.057              | <0.001      | 0.017         | 0.038      | 0.006        | 0.086         | 0.034       | 0.155          | 0.018        | 0.757        | 0.774         | 0.089       | 0.779        |
| 55            | 0.451              | <0.001      | 0.016         | 0.027      | 0.011        | 0.066         | 0.042       | 0.066          | 0.011        | 0.959        | 0.963         | 0.061       | 0.965        |
| 60            | 0.015              | <0.001      | 0.020         | 0.066      | 0.009        | 0.213         | 0.046       | 0.048          | 0.012        | 1.348        | 1.368         | 0.050       | 1.369        |
| 65            | 0.033              | <0.001      | 0.030         | 0.107      | 0.018        | 0.291         | 0.095       | 0.059          | 0.015        | 1.421        | 1.454         | 0.120       | 1.459        |
| 70            | 0.110              | <0.001      | 0.030         | 0.092      | 0.015        | 0.233         | 0.031       | 0.043          | 0.007        | 1.016        | 1.043         | 0.104       | 1.048        |

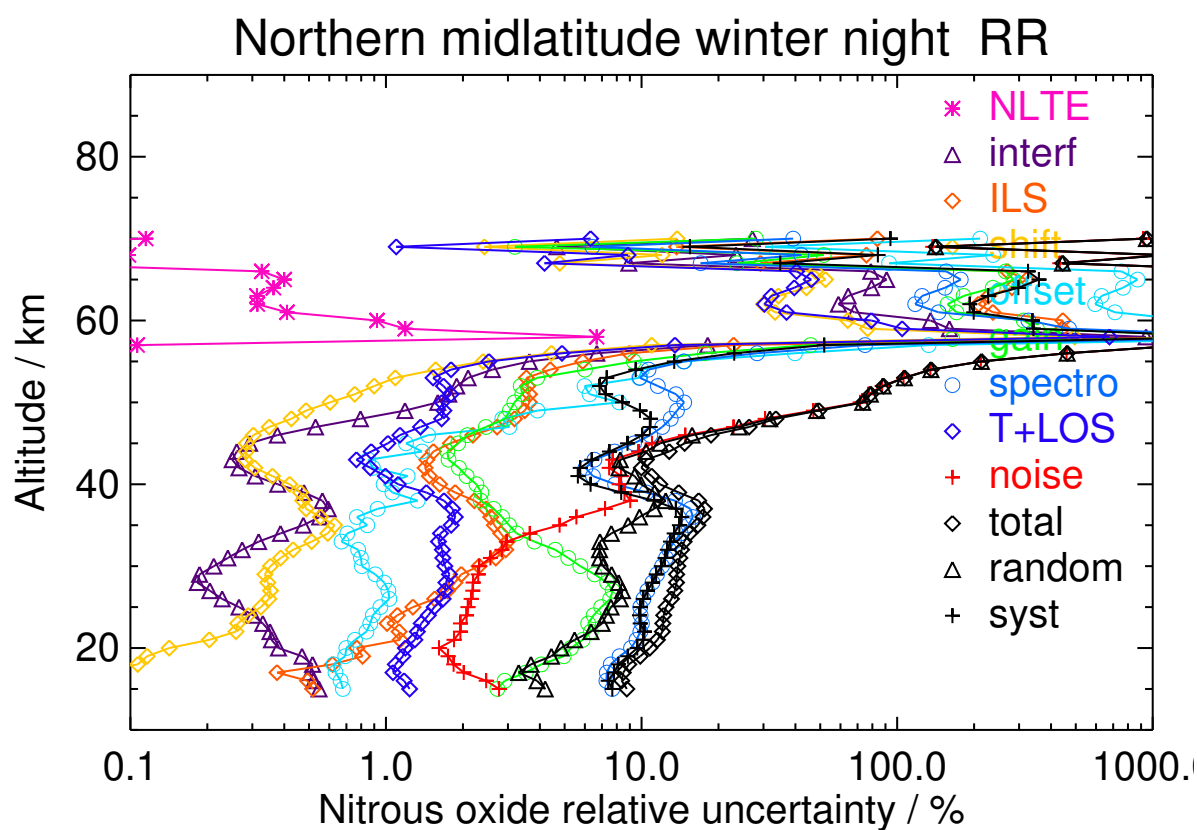

**Figure S214.** V8R\_N2O\_561 Northern midlatitude winter night

**Table S215.** Nitrous oxide error budget for Northern midlatitude spring day. All uncertainties are  $1\sigma$ .

| altitude (km) | mean target (ppbv) | NLTE (ppbv) | interf (ppbv) | ILS (ppbv) | shift (ppbv) | offset (ppbv) | gain (ppbv) | spectro (ppbv) | T+LOS (ppbv) | noise (ppbv) | random (ppbv) | syst (ppbv) | total (ppbv) |
|---------------|--------------------|-------------|---------------|------------|--------------|---------------|-------------|----------------|--------------|--------------|---------------|-------------|--------------|
| 30            | 89.815             | <0.001      | 0.205         | 0.924      | 0.355        | 0.654         | 2.162       | 9.356          | 1.704        | 2.136        | 3.605         | 9.387       | 10.056       |
| 35            | 27.357             | <0.001      | 0.161         | 0.497      | 0.227        | 0.170         | 0.563       | 3.183          | 0.480        | 0.989        | 1.611         | 3.068       | 3.465        |
| 40            | 9.894              | <0.001      | 0.049         | 0.065      | 0.100        | 0.089         | 0.226       | 0.851          | 0.106        | 0.559        | 0.847         | 0.636       | 1.059        |
| 45            | 4.261              | <0.001      | 0.014         | 0.060      | 0.013        | 0.078         | 0.081       | 0.330          | 0.033        | 0.516        | 0.571         | 0.259       | 0.627        |
| 50            | 2.267              | <0.001      | 0.017         | 0.045      | 0.006        | 0.019         | 0.039       | 0.172          | 0.021        | 0.522        | 0.535         | 0.146       | 0.554        |
| 55            | 1.070              | <0.001      | 0.019         | 0.039      | 0.012        | 0.076         | 0.022       | 0.099          | 0.015        | 0.859        | 0.865         | 0.087       | 0.870        |
| 60            | 0.285              | <0.001      | 0.018         | 0.054      | 0.009        | 0.156         | 0.017       | 0.050          | 0.010        | 1.162        | 1.174         | 0.055       | 1.175        |
| 65            | 0.723              | <0.001      | 0.046         | 0.180      | 0.036        | 0.259         | 0.078       | 0.095          | 0.016        | 1.365        | 1.394         | 0.197       | 1.408        |
| 70            | -1.031             | <0.001      | 0.024         | 0.085      | 0.014        | 0.213         | 0.040       | 0.040          | 0.006        | 0.988        | 1.011         | 0.102       | 1.016        |

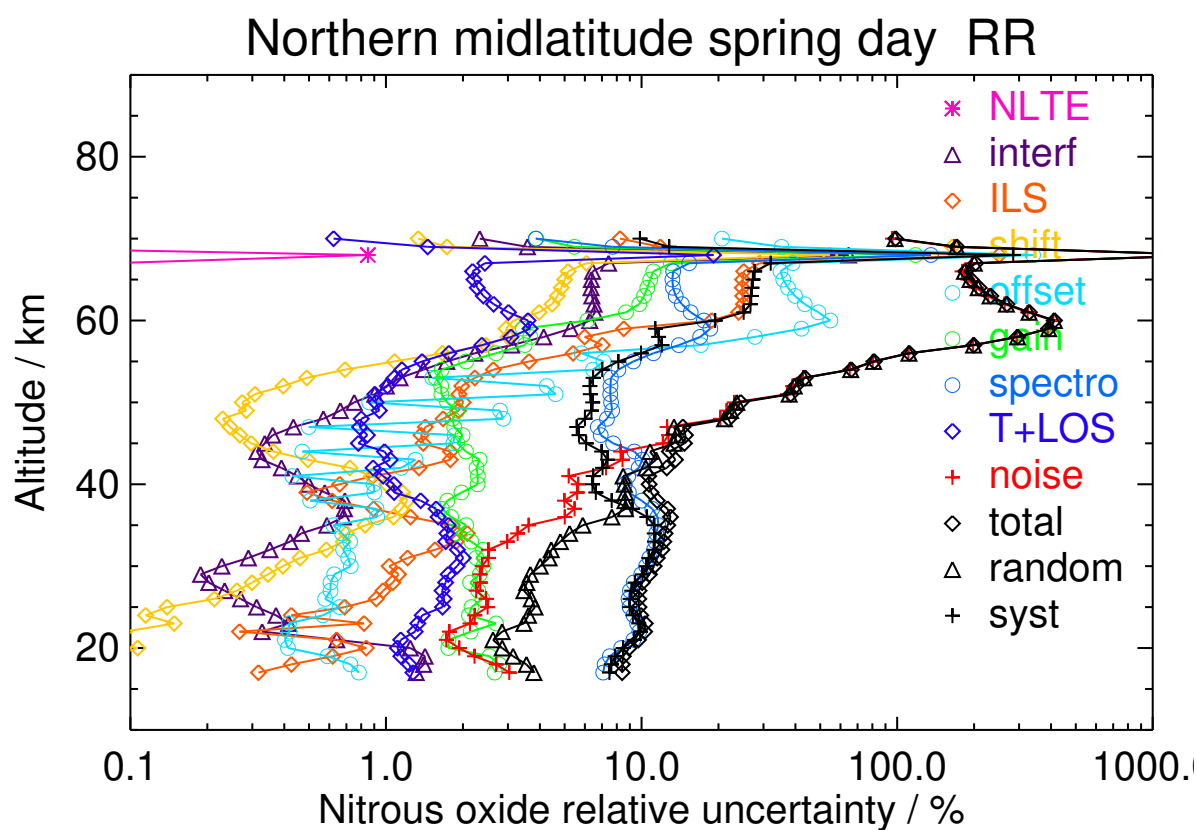

**Figure S215.** V8R\_N2O\_561 Northern midlatitude spring day

**Table S216.** Nitrous oxide error budget for Northern midlatitude spring night. All uncertainties are  $1\sigma$ .

| altitude (km) | mean target (ppbv) | NLTE (ppbv) | interf (ppbv) | ILS (ppbv) | shift (ppbv) | offset (ppbv) | gain (ppbv) | spectro (ppbv) | T+LOS (ppbv) | noise (ppbv) | random (ppbv) | syst (ppbv) | total (ppbv) |
|---------------|--------------------|-------------|---------------|------------|--------------|---------------|-------------|----------------|--------------|--------------|---------------|-------------|--------------|
| 30            | 86.958             | <0.001      | 0.190         | 1.216      | 0.354        | 0.535         | 1.587       | 9.428          | 1.592        | 2.140        | 3.286         | 9.469       | 10.023       |
| 35            | 23.578             | <0.001      | 0.155         | 0.502      | 0.207        | 0.154         | 0.278       | 2.919          | 0.461        | 1.022        | 1.562         | 2.785       | 3.193        |
| 40            | 7.832              | <0.001      | 0.044         | 0.052      | 0.097        | 0.091         | 0.226       | 0.747          | 0.089        | 0.536        | 0.794         | 0.544       | 0.962        |
| 45            | 2.372              | <0.001      | 0.013         | 0.055      | 0.010        | 0.060         | 0.074       | 0.266          | 0.023        | 0.450        | 0.508         | 0.168       | 0.535        |
| 50            | 1.466              | <0.001      | 0.017         | 0.036      | 0.005        | 0.026         | 0.030       | 0.130          | 0.014        | 0.512        | 0.523         | 0.098       | 0.532        |
| 55            | 0.817              | <0.001      | 0.018         | 0.025      | 0.009        | 0.088         | 0.017       | 0.077          | 0.012        | 0.899        | 0.906         | 0.045       | 0.907        |
| 60            | 0.489              | <0.001      | 0.016         | 0.041      | 0.008        | 0.154         | 0.015       | 0.055          | 0.011        | 1.138        | 1.150         | 0.044       | 1.151        |
| 65            | 0.271              | <0.001      | 0.037         | 0.126      | 0.027        | 0.259         | 0.046       | 0.073          | 0.012        | 1.360        | 1.389         | 0.116       | 1.394        |

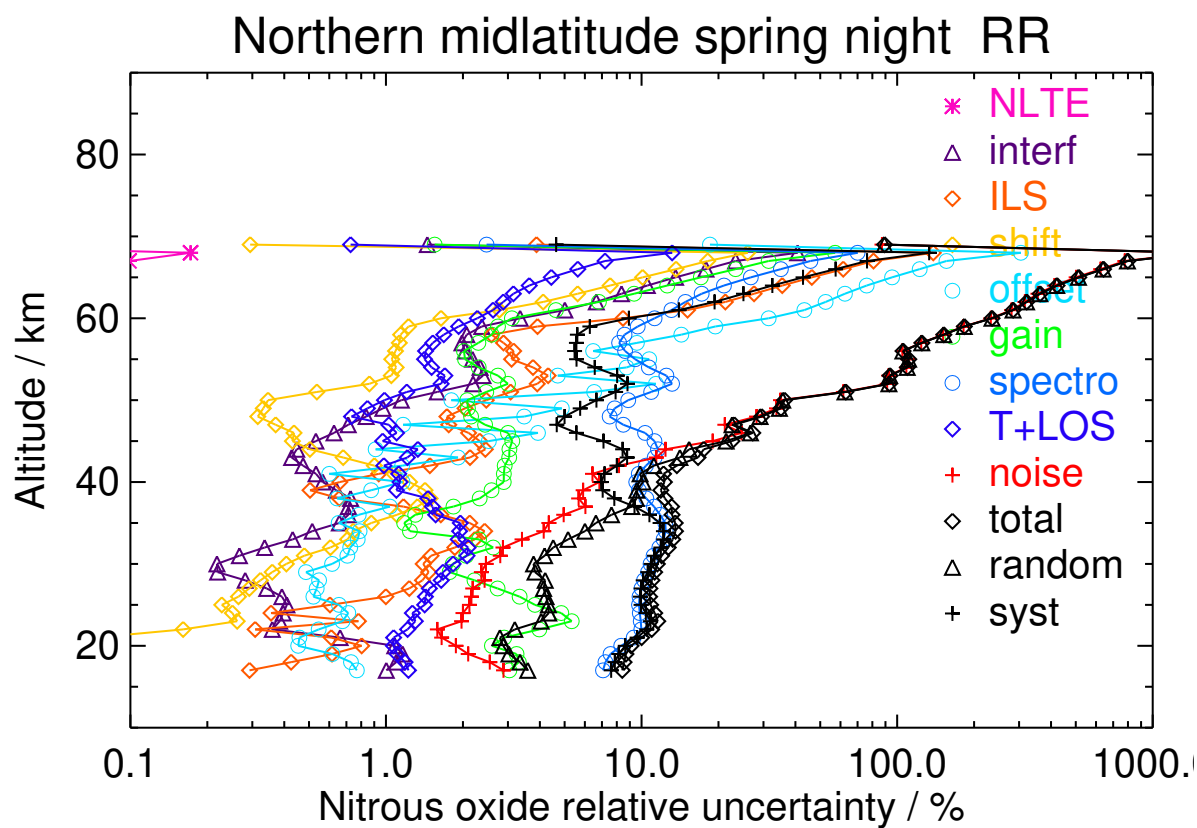

**Figure S216.** V8R\_N2O\_561 Northern midlatitude spring night

**Table S217.** Nitrous oxide error budget for Northern midlatitude summer day. All uncertainties are  $1\sigma$ .

| altitude (km) | mean target (ppbv) | NLTE (ppbv) | interf (ppbv) | ILS (ppbv) | shift (ppbv) | offset (ppbv) | gain (ppbv) | spectro (ppbv) | T+LOS (ppbv) | noise (ppbv) | random (ppbv) | syst (ppbv) | total (ppbv) |
|---------------|--------------------|-------------|---------------|------------|--------------|---------------|-------------|----------------|--------------|--------------|---------------|-------------|--------------|
| 30            | 80.160             | <0.001      | 0.175         | 1.008      | 0.271        | 0.627         | 2.930       | 7.729          | 1.494        | 1.753        | 2.771         | 8.214       | 8.669        |
| 35            | 22.005             | <0.001      | 0.148         | 0.474      | 0.195        | 0.140         | 0.328       | 2.517          | 0.418        | 0.841        | 1.191         | 2.492       | 2.762        |
| 40            | 3.336              | <0.001      | 0.019         | 0.021      | 0.013        | 0.061         | 0.069       | 0.360          | 0.061        | 0.357        | 0.399         | 0.333       | 0.520        |
| 45            | 1.288              | <0.001      | 0.010         | 0.022      | 0.005        | 0.059         | 0.028       | 0.131          | 0.012        | 0.375        | 0.394         | 0.087       | 0.403        |
| 50            | 0.441              | <0.001      | 0.015         | 0.013      | 0.004        | 0.014         | 0.010       | 0.063          | 0.008        | 0.413        | 0.419         | 0.021       | 0.419        |
| 55            | 1.001              | <0.001      | 0.019         | 0.029      | 0.009        | 0.080         | 0.026       | 0.108          | 0.012        | 0.766        | 0.777         | 0.049       | 0.779        |
| 60            | 1.251              | <0.001      | 0.016         | 0.036      | 0.008        | 0.131         | 0.012       | 0.079          | 0.014        | 1.045        | 1.055         | 0.060       | 1.057        |
| 65            | 0.896              | <0.001      | 0.056         | 0.196      | 0.038        | 0.235         | 0.101       | 0.106          | 0.021        | 1.311        | 1.336         | 0.234       | 1.356        |

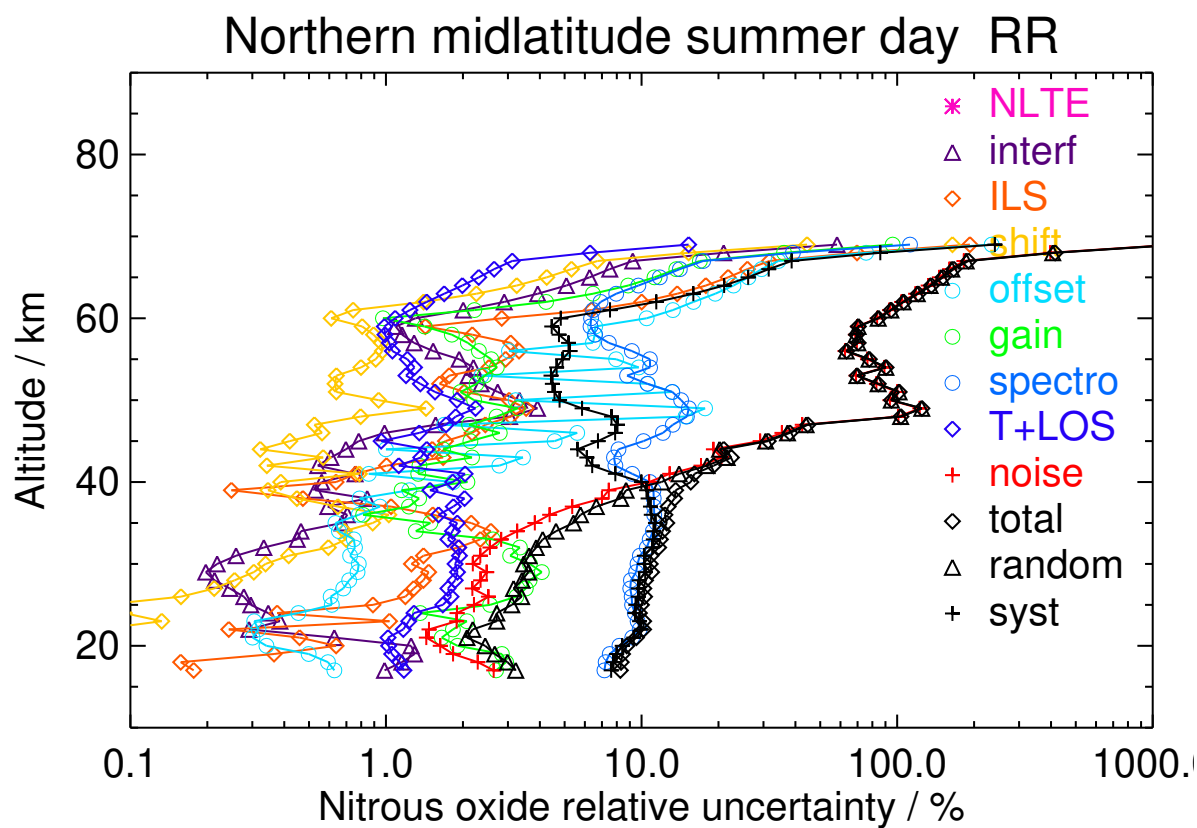

**Figure S217.** V8R\_N2O\_561 Northern midlatitude summer day

**Table S218.** Nitrous oxide error budget for Northern midlatitude summer night. All uncertainties are  $1\sigma$ .

| altitude (km) | mean target (ppbv) | NLTE (ppbv) | interf (ppbv) | ILS (ppbv) | shift (ppbv) | offset (ppbv) | gain (ppbv) | spectro (ppbv) | T+LOS (ppbv) | noise (ppbv) | random (ppbv) | syst (ppbv) | total (ppbv) |
|---------------|--------------------|-------------|---------------|------------|--------------|---------------|-------------|----------------|--------------|--------------|---------------|-------------|--------------|
| 30            | 83.327             | <0.001      | 0.178         | 1.003      | 0.266        | 0.599         | 2.380       | 8.558          | 1.518        | 1.743        | 2.660         | 8.867       | 9.258        |
| 35            | 22.055             | <0.001      | 0.159         | 0.465      | 0.207        | 0.123         | 0.159       | 2.470          | 0.404        | 0.831        | 1.107         | 2.461       | 2.698        |
| 40            | 3.122              | <0.001      | 0.018         | 0.016      | 0.012        | 0.061         | 0.062       | 0.340          | 0.058        | 0.342        | 0.379         | 0.316       | 0.494        |
| 45            | 0.888              | <0.001      | 0.010         | 0.016      | 0.005        | 0.048         | 0.019       | 0.080          | 0.011        | 0.329        | 0.338         | 0.059       | 0.343        |
| 50            | 0.364              | <0.001      | 0.014         | 0.012      | 0.003        | 0.017         | 0.008       | 0.052          | 0.007        | 0.385        | 0.390         | 0.019       | 0.390        |
| 55            | 1.518              | <0.001      | 0.019         | 0.024      | 0.008        | 0.090         | 0.021       | 0.086          | 0.012        | 0.789        | 0.798         | 0.057       | 0.800        |
| 60            | 1.343              | <0.001      | 0.014         | 0.019      | 0.010        | 0.123         | 0.018       | 0.091          | 0.013        | 0.989        | 0.999         | 0.070       | 1.001        |
| 65            | 0.666              | <0.001      | 0.058         | 0.189      | 0.035        | 0.230         | 0.054       | 0.094          | 0.016        | 1.297        | 1.320         | 0.213       | 1.337        |

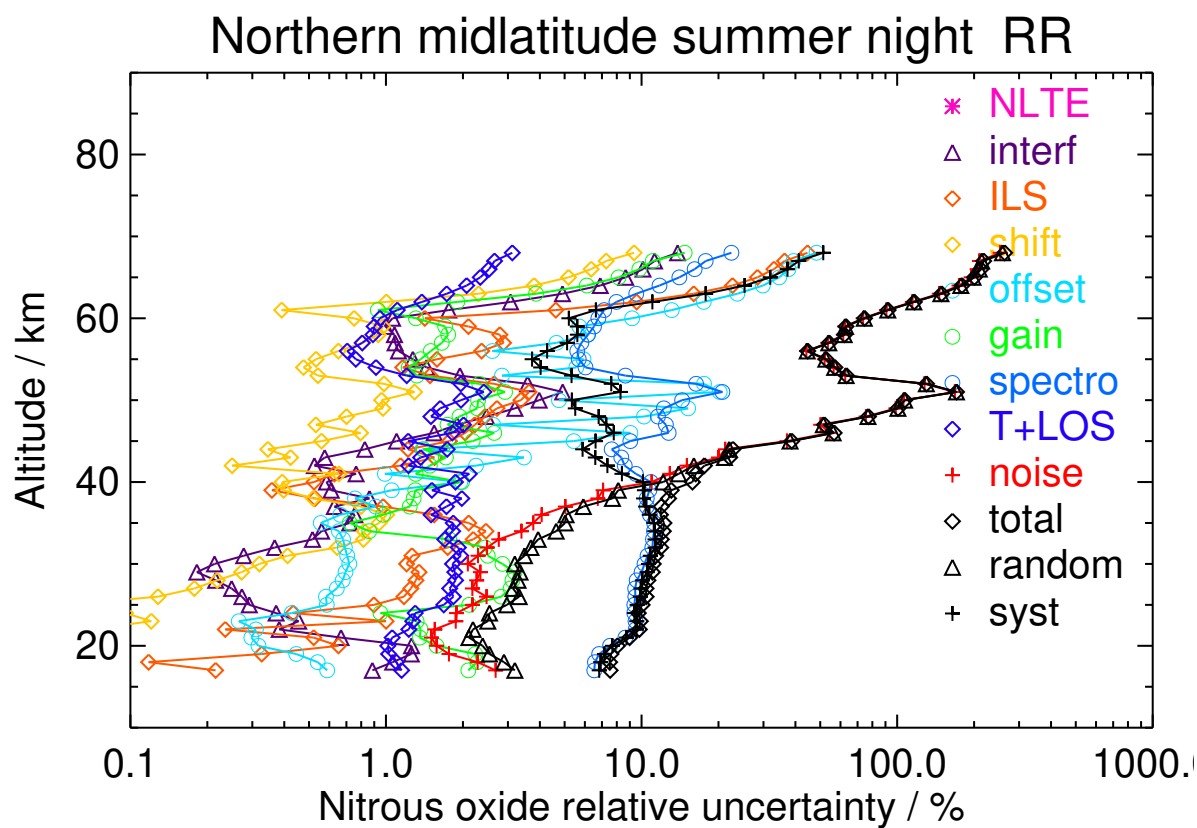

**Figure S218.** V8R\_N2O\_561 Northern midlatitude summer night

**Table S219.** Nitrous oxide error budget for Northern midlatitude autumn day. All uncertainties are  $1\sigma$ .

| altitude (km) | mean target (ppbv) | NLTE (ppbv) | interf (ppbv) | ILS (ppbv) | shift (ppbv) | offset (ppbv) | gain (ppbv) | spectro (ppbv) | T+LOS (ppbv) | noise (ppbv) | random (ppbv) | syst (ppbv) | total (ppbv) |
|---------------|--------------------|-------------|---------------|------------|--------------|---------------|-------------|----------------|--------------|--------------|---------------|-------------|--------------|
| 30            | 73.677             | <0.001      | 0.165         | 1.015      | 0.293        | 0.576         | 2.215       | 8.290          | 1.465        | 2.093        | 3.967         | 8.117       | 9.035        |
| 35            | 35.818             | <0.001      | 0.160         | 0.494      | 0.256        | 0.190         | 0.496       | 3.687          | 0.481        | 1.176        | 2.530         | 3.069       | 3.978        |
| 40            | 18.688             | <0.001      | 0.083         | 0.208      | 0.221        | 0.128         | 0.393       | 1.778          | 0.203        | 0.873        | 1.489         | 1.421       | 2.058        |
| 45            | 6.778              | <0.001      | 0.018         | 0.141      | 0.028        | 0.069         | 0.169       | 0.711          | 0.066        | 0.610        | 0.787         | 0.564       | 0.968        |
| 50            | 3.200              | <0.001      | 0.018         | 0.058      | 0.007        | 0.033         | 0.054       | 0.206          | 0.029        | 0.641        | 0.653         | 0.185       | 0.679        |
| 55            | 1.702              | <0.001      | 0.020         | 0.040      | 0.012        | 0.082         | 0.033       | 0.119          | 0.018        | 0.980        | 0.987         | 0.105       | 0.993        |
| 60            | 0.747              | <0.001      | 0.023         | 0.074      | 0.014        | 0.188         | 0.030       | 0.074          | 0.017        | 1.287        | 1.303         | 0.084       | 1.305        |
| 65            | 0.028              | <0.001      | 0.042         | 0.169      | 0.040        | 0.270         | 0.084       | 0.103          | 0.019        | 1.403        | 1.435         | 0.181       | 1.446        |
| 70            | -0.157             | <0.001      | 0.016         | 0.064      | 0.009        | 0.215         | 0.052       | 0.037          | 0.011        | 1.005        | 1.029         | 0.076       | 1.032        |

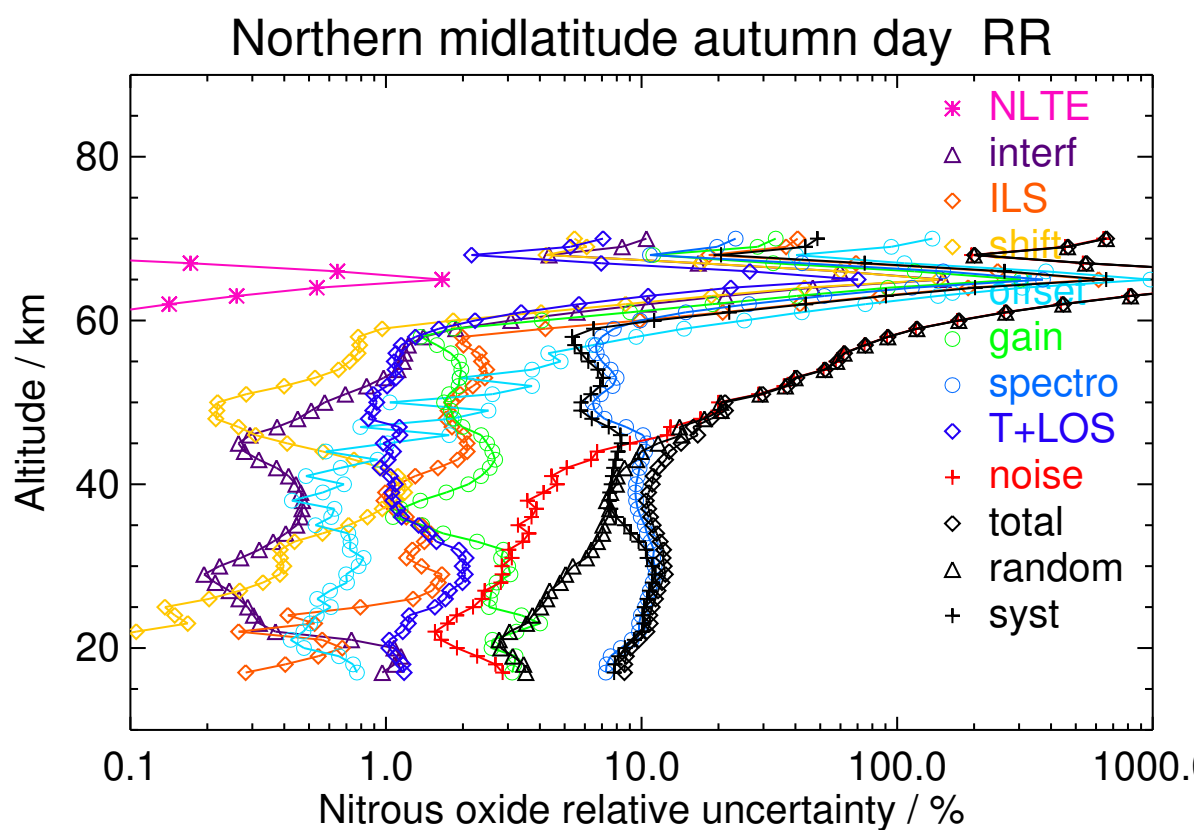

**Figure S219.** V8R\_N2O\_561 Northern midlatitude autumn day

**Table S220.** Nitrous oxide error budget for Northern midlatitude autumn night. All uncertainties are  $1\sigma$ .

| altitude (km) | mean target (ppbv) | NLTE (ppbv) | interf (ppbv) | ILS (ppbv) | shift (ppbv) | offset (ppbv) | gain (ppbv) | spectro (ppbv) | T+LOS (ppbv) | noise (ppbv) | random (ppbv) | syst (ppbv) | total (ppbv) |
|---------------|--------------------|-------------|---------------|------------|--------------|---------------|-------------|----------------|--------------|--------------|---------------|-------------|--------------|
| 30            | 83.306             | <0.001      | 0.205         | 1.057      | 0.300        | 0.537         | 2.063       | 9.145          | 1.467        | 2.135        | 4.272         | 8.825       | 9.805        |
| 35            | 40.049             | <0.001      | 0.173         | 0.680      | 0.246        | 0.212         | 0.657       | 4.406          | 0.579        | 1.290        | 2.471         | 4.042       | 4.737        |
| 40            | 16.893             | <0.001      | 0.073         | 0.241      | 0.155        | 0.131         | 0.405       | 1.736          | 0.198        | 0.900        | 1.495         | 1.378       | 2.033        |
| 45            | 6.631              | <0.001      | 0.017         | 0.144      | 0.018        | 0.060         | 0.156       | 0.708          | 0.066        | 0.613        | 0.780         | 0.567       | 0.964        |
| 50            | 3.360              | <0.001      | 0.019         | 0.057      | 0.007        | 0.044         | 0.056       | 0.215          | 0.030        | 0.673        | 0.689         | 0.184       | 0.713        |
| 55            | 1.662              | <0.001      | 0.020         | 0.040      | 0.011        | 0.086         | 0.036       | 0.137          | 0.020        | 1.015        | 1.022         | 0.125       | 1.029        |
| 60            | 1.068              | <0.001      | 0.020         | 0.052      | 0.008        | 0.201         | 0.029       | 0.067          | 0.016        | 1.317        | 1.334         | 0.068       | 1.336        |
| 65            | 0.443              | <0.001      | 0.031         | 0.120      | 0.025        | 0.275         | 0.086       | 0.072          | 0.017        | 1.412        | 1.442         | 0.135       | 1.449        |
| 70            | -0.356             | <0.001      | 0.009         | 0.019      | 0.006        | 0.212         | 0.009       | 0.003          | 0.004        | 0.989        | 1.011         | 0.021       | 1.012        |

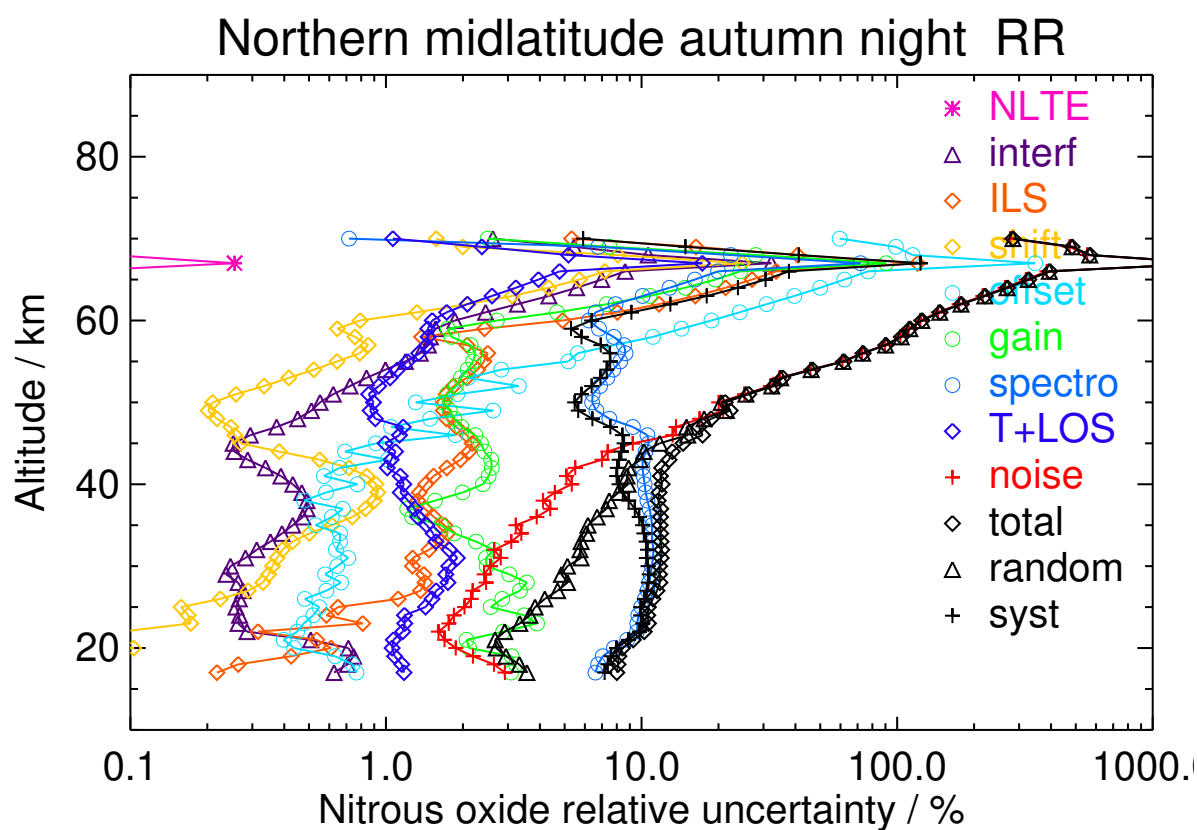

**Figure S220.** V8R\_N2O\_561 Northern midlatitude autumn night

**Table S221.** Nitrous oxide error budget for Tropics day. All uncertainties are  $1\sigma$ .

| altitude (km) | mean target (ppbv) | NLTE (ppbv) | interf (ppbv) | ILS (ppbv) | shift (ppbv) | offset (ppbv) | gain (ppbv) | spectro (ppbv) | T+LOS (ppbv) | noise (ppbv) | random (ppbv) | syst (ppbv) | total (ppbv) |
|---------------|--------------------|-------------|---------------|------------|--------------|---------------|-------------|----------------|--------------|--------------|---------------|-------------|--------------|
| 30            | 209.781            | <0.001      | 0.717         | 1.594      | 0.495        | 0.845         | 1.074       | 17.820         | 2.654        | 3.106        | 4.816         | 17.782      | 18.423       |
| 35            | 112.282            | <0.001      | 0.460         | 0.703      | 0.552        | 0.459         | 0.535       | 9.887          | 1.258        | 1.770        | 2.829         | 9.796       | 10.196       |
| 40            | 29.104             | <0.001      | 0.151         | 0.079      | 0.387        | 0.138         | 0.549       | 2.700          | 0.355        | 0.915        | 1.332         | 2.642       | 2.959        |
| 45            | 7.469              | <0.001      | 0.017         | 0.107      | 0.029        | 0.084         | 0.155       | 0.579          | 0.066        | 0.536        | 0.624         | 0.530       | 0.819        |
| 50            | 2.730              | <0.001      | 0.017         | 0.064      | 0.008        | 0.025         | 0.051       | 0.231          | 0.033        | 0.511        | 0.524         | 0.222       | 0.569        |
| 55            | 0.743              | <0.001      | 0.019         | 0.043      | 0.014        | 0.065         | 0.016       | 0.086          | 0.013        | 0.797        | 0.804         | 0.070       | 0.807        |
| 60            | 0.301              | <0.001      | 0.025         | 0.100      | 0.019        | 0.152         | 0.034       | 0.074          | 0.012        | 1.147        | 1.160         | 0.109       | 1.165        |
| 65            | -0.175             | <0.001      | 0.079         | 0.320      | 0.083        | 0.253         | 0.124       | 0.212          | 0.023        | 1.363        | 1.393         | 0.396       | 1.449        |

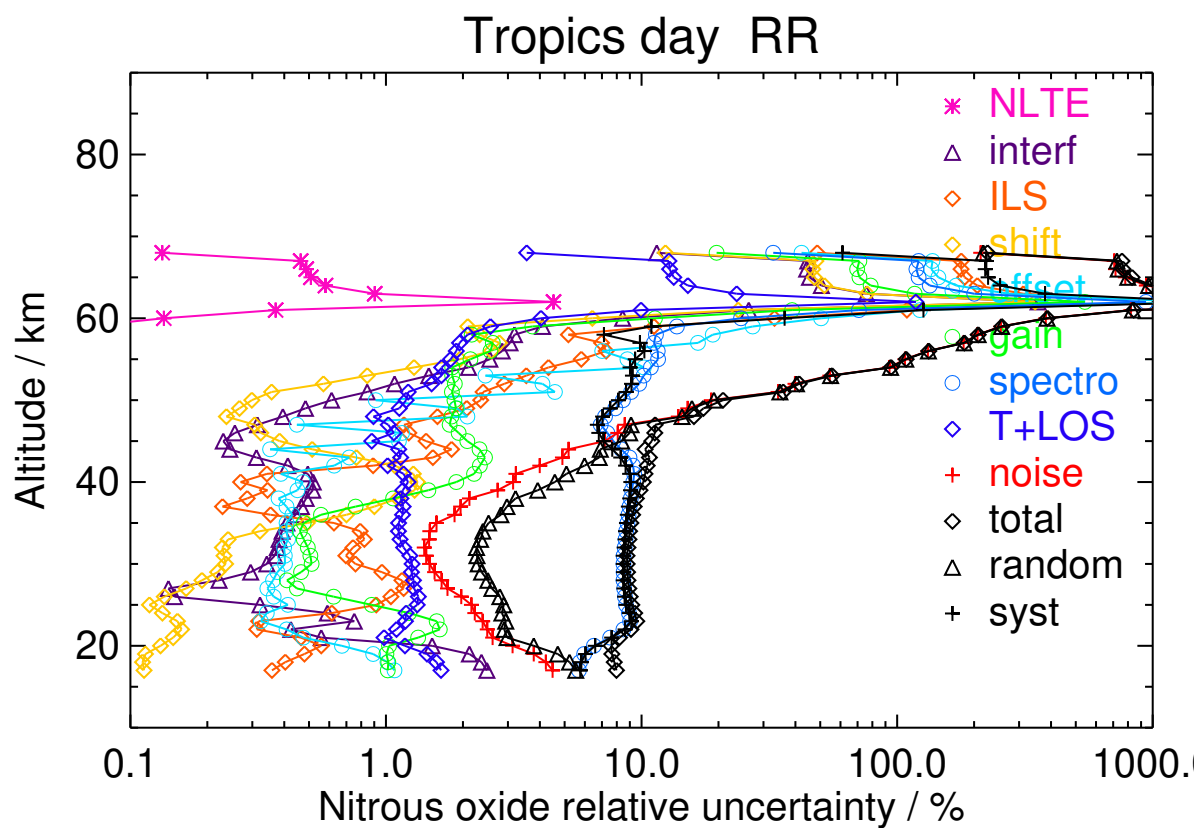

**Figure S221.** V8R\_N2O\_561 Tropics day



**Table S222.** Nitrous oxide error budget for Tropics night. All uncertainties are  $1\sigma$ .

| altitude (km) | mean target (ppbv) | NLTE (ppbv) | interf (ppbv) | ILS (ppbv) | shift (ppbv) | offset (ppbv) | gain (ppbv) | spectro (ppbv) | T+LOS (ppbv) | noise (ppbv) | random (ppbv) | syst (ppbv) | total (ppbv) |
|---------------|--------------------|-------------|---------------|------------|--------------|---------------|-------------|----------------|--------------|--------------|---------------|-------------|--------------|
| 30            | 207.480            | <0.001      | 0.793         | 1.562      | 0.511        | 0.778         | 1.055       | 17.769         | 2.562        | 3.014        | 4.795         | 17.704      | 18.342       |
| 35            | 110.066            | <0.001      | 0.446         | 0.737      | 0.516        | 0.432         | 0.578       | 9.633          | 1.220        | 1.742        | 2.779         | 9.546       | 9.942        |
| 40            | 32.483             | <0.001      | 0.161         | 0.113      | 0.451        | 0.155         | 0.596       | 2.824          | 0.368        | 0.979        | 1.415         | 2.772       | 3.112        |
| 45            | 7.568              | <0.001      | 0.019         | 0.127      | 0.036        | 0.062         | 0.170       | 0.633          | 0.075        | 0.483        | 0.565         | 0.609       | 0.831        |
| 50            | 2.503              | <0.001      | 0.017         | 0.061      | 0.007        | 0.024         | 0.046       | 0.213          | 0.034        | 0.494        | 0.506         | 0.202       | 0.545        |
| 55            | 0.605              | <0.001      | 0.019         | 0.037      | 0.014        | 0.084         | 0.015       | 0.067          | 0.010        | 0.842        | 0.848         | 0.059       | 0.851        |
| 60            | 0.653              | <0.001      | 0.023         | 0.086      | 0.017        | 0.156         | 0.027       | 0.071          | 0.012        | 1.132        | 1.145         | 0.098       | 1.149        |
| 65            | 0.279              | <0.001      | 0.078         | 0.312      | 0.083        | 0.248         | 0.121       | 0.212          | 0.024        | 1.355        | 1.385         | 0.389       | 1.438        |

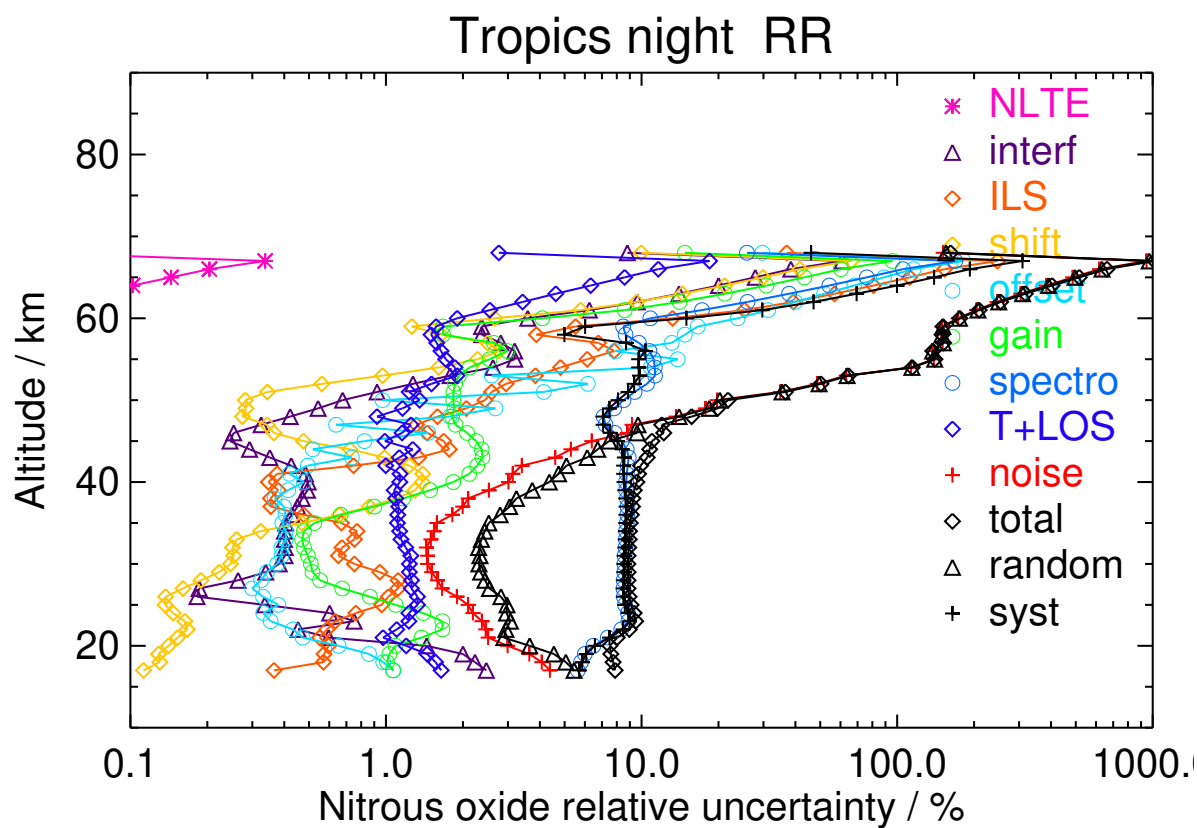

**Figure S222.** V8R\_N2O\_561 Tropics night

**Table S223.** Nitrous oxide error budget for Southern midlatitude winter day. All uncertainties are  $1\sigma$ .

| altitude (km) | mean target (ppbv) | NLTE (ppbv) | interf (ppbv) | ILS (ppbv) | shift (ppbv) | offset (ppbv) | gain (ppbv) | spectro (ppbv) | T+LOS (ppbv) | noise (ppbv) | random (ppbv) | syst (ppbv) | total (ppbv) |
|---------------|--------------------|-------------|---------------|------------|--------------|---------------|-------------|----------------|--------------|--------------|---------------|-------------|--------------|
| 30            | 122.327            | <0.001      | 0.290         | 2.117      | 0.487        | 0.937         | 6.441       | 13.265         | 2.119        | 2.435        | 8.691         | 12.570      | 15.282       |
| 35            | 38.824             | <0.001      | 0.142         | 1.375      | 0.226        | 0.332         | 1.871       | 6.407          | 0.823        | 1.332        | 3.872         | 5.838       | 7.006        |
| 40            | 3.294              | <0.001      | 0.017         | 0.144      | 0.013        | 0.090         | 0.132       | 0.776          | 0.063        | 0.568        | 0.906         | 0.393       | 0.988        |
| 45            | 2.334              | <0.001      | 0.012         | 0.028      | 0.006        | 0.019         | 0.043       | 0.144          | 0.022        | 0.440        | 0.457         | 0.097       | 0.467        |
| 50            | 2.055              | <0.001      | 0.017         | 0.039      | 0.007        | 0.077         | 0.041       | 0.162          | 0.017        | 0.692        | 0.707         | 0.123       | 0.718        |
| 55            | 0.876              | <0.001      | 0.017         | 0.030      | 0.010        | 0.076         | 0.027       | 0.087          | 0.014        | 1.011        | 1.016         | 0.071       | 1.019        |
| 60            | 1.035              | <0.001      | 0.023         | 0.082      | 0.012        | 0.204         | 0.061       | 0.062          | 0.016        | 1.328        | 1.347         | 0.070       | 1.349        |
| 65            | 0.862              | <0.001      | 0.043         | 0.152      | 0.027        | 0.273         | 0.166       | 0.083          | 0.024        | 1.398        | 1.436         | 0.170       | 1.446        |

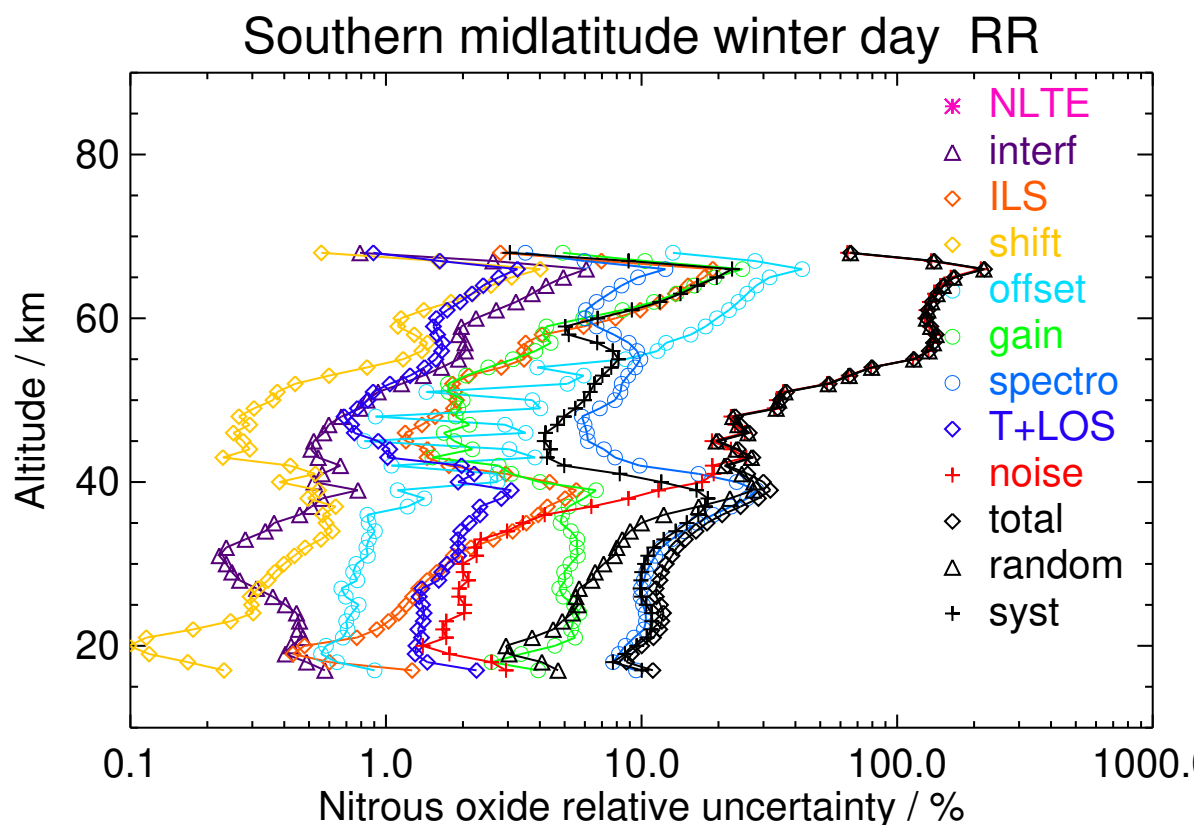

**Figure S223.** V8R\_N2O\_561 Southern midlatitude winter day

**Table S224.** Nitrous oxide error budget for Southern midlatitude winter night. All uncertainties are  $1\sigma$ .

| altitude (km) | mean target (ppbv) | NLTE (ppbv) | interf (ppbv) | ILS (ppbv) | shift (ppbv) | offset (ppbv) | gain (ppbv) | spectro (ppbv) | T+LOS (ppbv) | noise (ppbv) | random (ppbv) | syst (ppbv) | total (ppbv) |
|---------------|--------------------|-------------|---------------|------------|--------------|---------------|-------------|----------------|--------------|--------------|---------------|-------------|--------------|
| 30            | 84.126             | <0.001      | 0.240         | 1.190      | 0.299        | 0.604         | 3.277       | 9.835          | 1.594        | 2.453        | 6.387         | 8.784       | 10.861       |
| 35            | 29.462             | <0.001      | 0.126         | 0.917      | 0.174        | 0.253         | 0.914       | 4.591          | 0.640        | 1.395        | 3.019         | 4.013       | 5.022        |
| 40            | 2.383              | <0.001      | 0.014         | 0.122      | 0.012        | 0.095         | 0.084       | 0.575          | 0.061        | 0.610        | 0.782         | 0.355       | 0.859        |
| 45            | 1.624              | <0.001      | 0.012         | 0.025      | 0.005        | 0.023         | 0.029       | 0.115          | 0.017        | 0.467        | 0.479         | 0.069       | 0.484        |
| 50            | 1.391              | <0.001      | 0.018         | 0.029      | 0.006        | 0.070         | 0.030       | 0.112          | 0.013        | 0.668        | 0.678         | 0.073       | 0.682        |
| 55            | 0.696              | <0.001      | 0.018         | 0.027      | 0.009        | 0.080         | 0.024       | 0.077          | 0.012        | 0.999        | 1.004         | 0.053       | 1.006        |
| 60            | 0.359              | <0.001      | 0.019         | 0.065      | 0.010        | 0.198         | 0.036       | 0.052          | 0.013        | 1.296        | 1.314         | 0.051       | 1.315        |
| 65            | 0.128              | <0.001      | 0.030         | 0.128      | 0.017        | 0.268         | 0.088       | 0.053          | 0.015        | 1.387        | 1.418         | 0.110       | 1.422        |

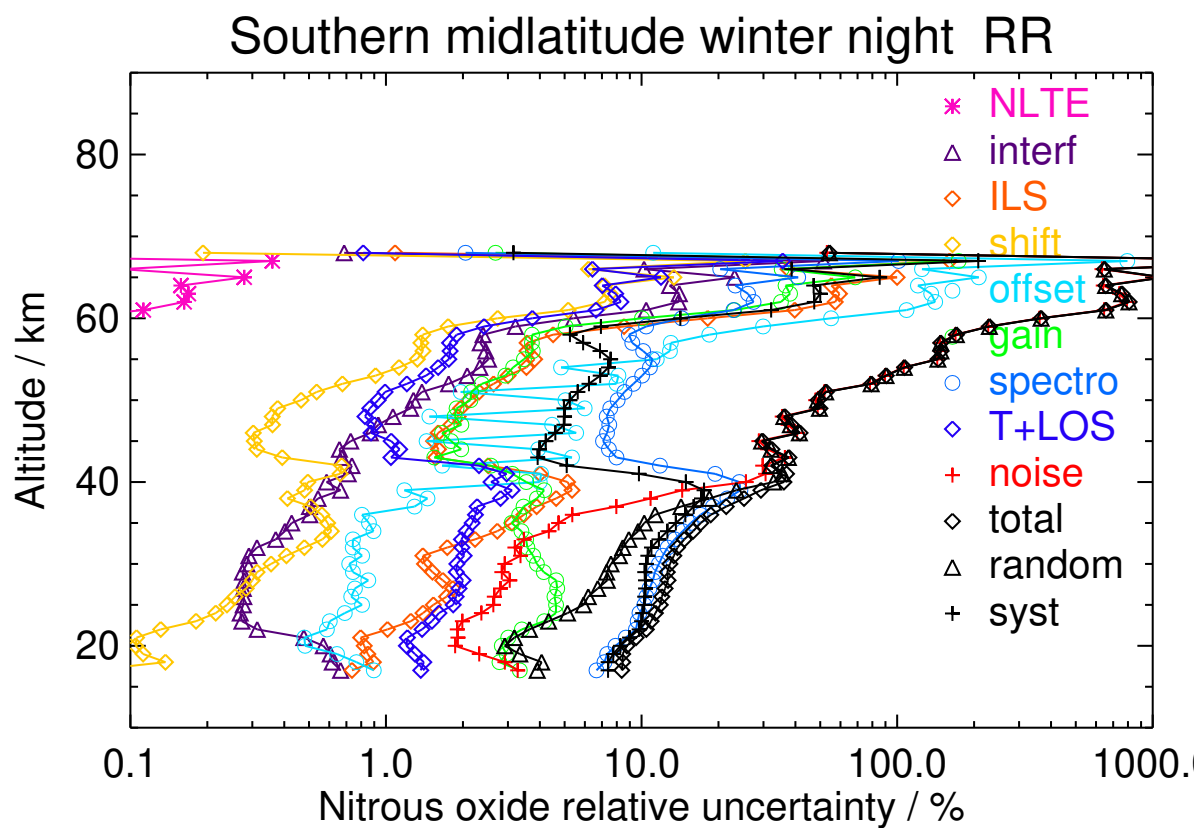

**Figure S224.** V8R\_N2O\_561 Southern midlatitude winter night

**Table S225.** Nitrous oxide error budget for Southern midlatitude spring day. All uncertainties are  $1\sigma$ .

| altitude (km) | mean target (ppbv) | NLTE (ppbv) | interf (ppbv) | ILS (ppbv) | shift (ppbv) | offset (ppbv) | gain (ppbv) | spectro (ppbv) | T+LOS (ppbv) | noise (ppbv) | random (ppbv) | syst (ppbv) | total (ppbv) |
|---------------|--------------------|-------------|---------------|------------|--------------|---------------|-------------|----------------|--------------|--------------|---------------|-------------|--------------|
| 30            | 128.987            | <0.001      | 0.320         | 1.497      | 0.428        | 0.841         | 4.629       | 13.244         | 1.997        | 2.135        | 6.128         | 13.079      | 14.443       |
| 35            | 35.698             | <0.001      | 0.164         | 1.060      | 0.222        | 0.235         | 0.626       | 5.140          | 0.696        | 1.154        | 2.620         | 4.798       | 5.466        |
| 40            | 7.661              | <0.001      | 0.030         | 0.076      | 0.027        | 0.092         | 0.091       | 0.702          | 0.096        | 0.586        | 0.685         | 0.633       | 0.932        |
| 45            | 2.612              | <0.001      | 0.012         | 0.044      | 0.004        | 0.017         | 0.039       | 0.205          | 0.032        | 0.410        | 0.425         | 0.185       | 0.464        |
| 50            | 2.128              | <0.001      | 0.017         | 0.035      | 0.007        | 0.078         | 0.038       | 0.128          | 0.015        | 0.631        | 0.641         | 0.115       | 0.651        |
| 55            | 0.753              | <0.001      | 0.016         | 0.031      | 0.011        | 0.073         | 0.032       | 0.067          | 0.011        | 0.908        | 0.912         | 0.061       | 0.915        |
| 60            | 1.129              | <0.001      | 0.019         | 0.047      | 0.010        | 0.156         | 0.051       | 0.065          | 0.015        | 1.152        | 1.165         | 0.057       | 1.167        |
| 65            | 0.403              | <0.001      | 0.045         | 0.158      | 0.030        | 0.255         | 0.208       | 0.090          | 0.029        | 1.365        | 1.399         | 0.226       | 1.417        |

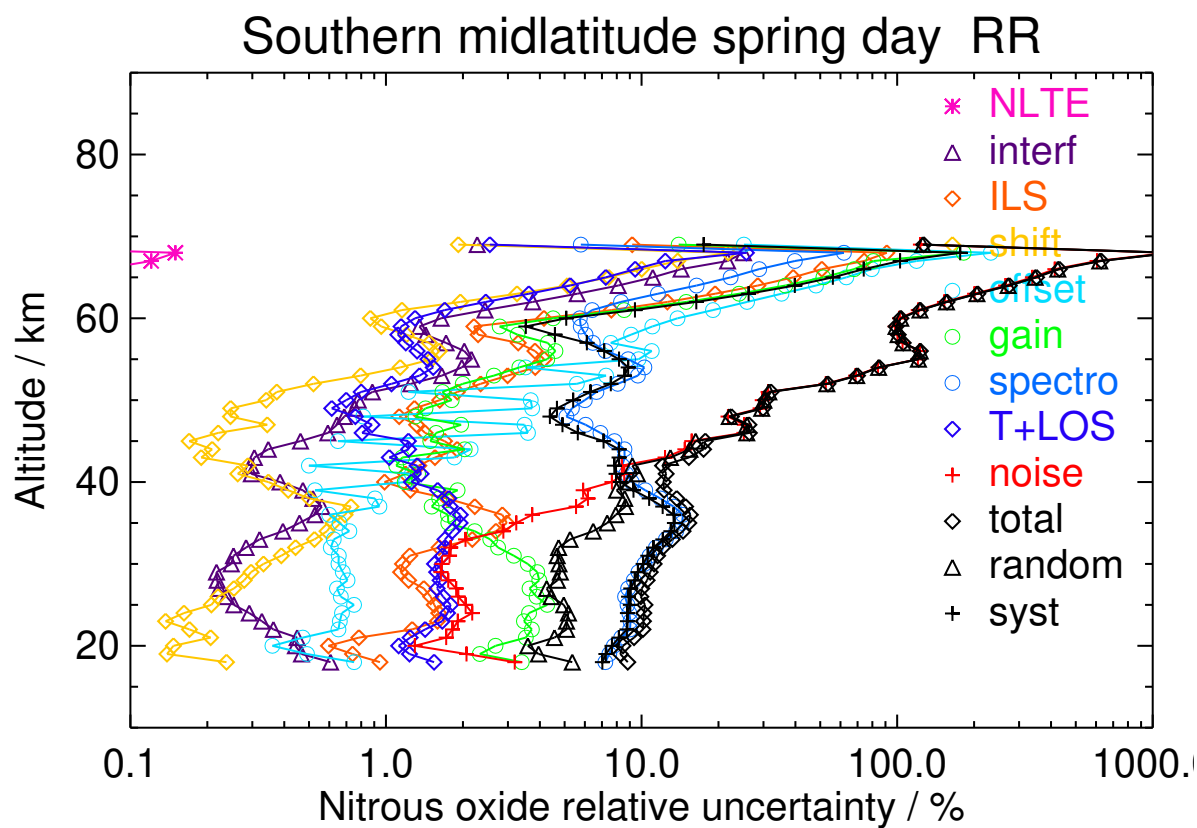

**Figure S225.** V8R\_N2O\_561 Southern midlatitude spring day

**Table S226.** Nitrous oxide error budget for Southern midlatitude spring night. All uncertainties are  $1\sigma$ .

| altitude (km) | mean target (ppbv) | NLTE (ppbv) | interf (ppbv) | ILS (ppbv) | shift (ppbv) | offset (ppbv) | gain (ppbv) | spectro (ppbv) | T+LOS (ppbv) | noise (ppbv) | random (ppbv) | syst (ppbv) | total (ppbv) |
|---------------|--------------------|-------------|---------------|------------|--------------|---------------|-------------|----------------|--------------|--------------|---------------|-------------|--------------|
| 30            | 127.074            | <0.001      | 0.273         | 1.876      | 0.450        | 0.876         | 5.139       | 11.562         | 1.929        | 2.264        | 6.164         | 11.641      | 13.172       |
| 35            | 43.191             | <0.001      | 0.164         | 1.141      | 0.271        | 0.289         | 1.366       | 5.644          | 0.762        | 1.158        | 2.950         | 5.331       | 6.093        |
| 40            | 8.228              | <0.001      | 0.030         | 0.069      | 0.029        | 0.103         | 0.098       | 0.764          | 0.111        | 0.626        | 0.736         | 0.688       | 1.007        |
| 45            | 2.827              | <0.001      | 0.012         | 0.047      | 0.006        | 0.029         | 0.053       | 0.211          | 0.029        | 0.419        | 0.433         | 0.200       | 0.477        |
| 50            | 1.857              | <0.001      | 0.017         | 0.034      | 0.007        | 0.057         | 0.036       | 0.117          | 0.014        | 0.573        | 0.581         | 0.105       | 0.591        |
| 55            | 1.033              | <0.001      | 0.018         | 0.039      | 0.011        | 0.087         | 0.040       | 0.092          | 0.014        | 0.935        | 0.942         | 0.083       | 0.945        |
| 60            | 0.232              | <0.001      | 0.019         | 0.058      | 0.007        | 0.161         | 0.053       | 0.053          | 0.013        | 1.165        | 1.178         | 0.067       | 1.180        |
| 65            | -0.227             | <0.001      | 0.040         | 0.172      | 0.031        | 0.258         | 0.221       | 0.108          | 0.026        | 1.368        | 1.404         | 0.245       | 1.425        |
| 70            | 0.479              | <0.001      | 0.018         | 0.069      | 0.014        | 0.208         | 0.077       | 0.042          | 0.012        | 0.998        | 1.021         | 0.106       | 1.026        |

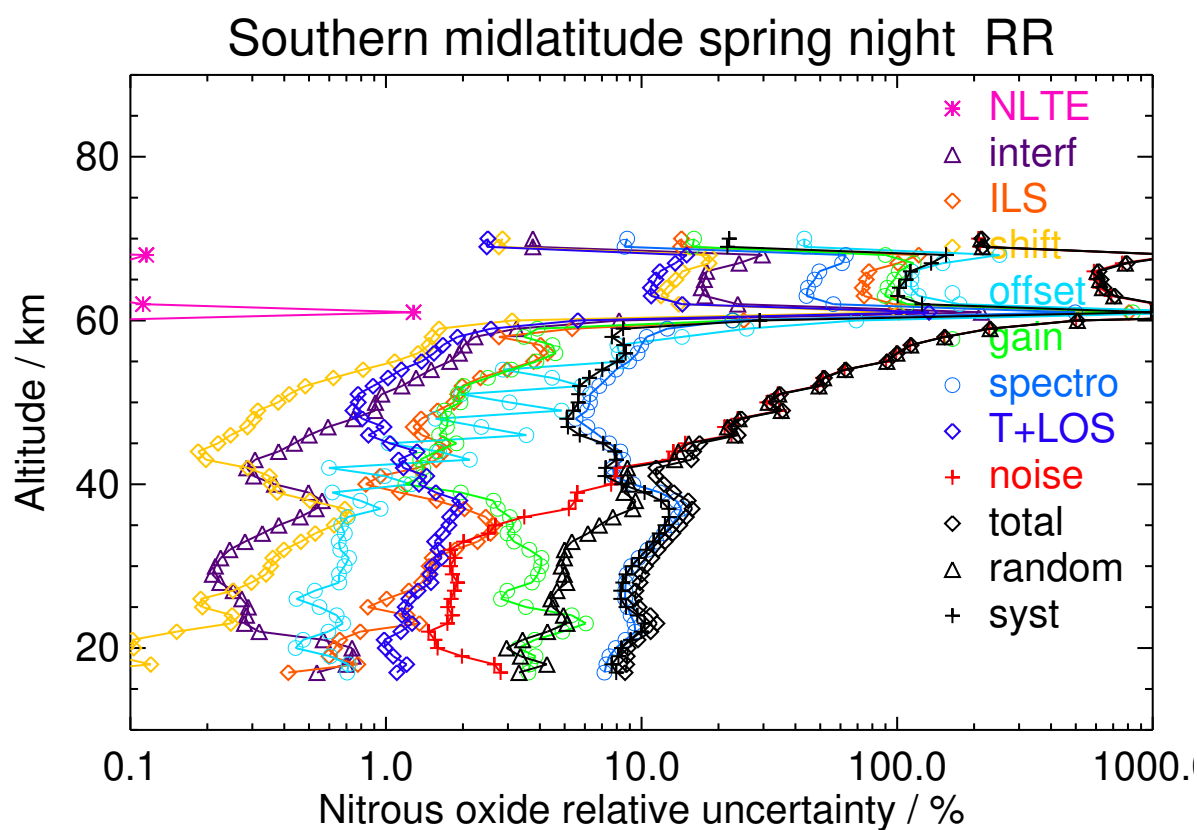

**Figure S226.** V8R\_N2O\_561 Southern midlatitude spring night

**Table S227.** Nitrous oxide error budget for Southern midlatitude summer day. All uncertainties are  $1\sigma$ .

| altitude (km) | mean target (ppbv) | NLTE (ppbv) | interf (ppbv) | ILS (ppbv) | shift (ppbv) | offset (ppbv) | gain (ppbv) | spectro (ppbv) | T+LOS (ppbv) | noise (ppbv) | random (ppbv) | syst (ppbv) | total (ppbv) |
|---------------|--------------------|-------------|---------------|------------|--------------|---------------|-------------|----------------|--------------|--------------|---------------|-------------|--------------|
| 30            | 75.999             | <0.001      | 0.223         | 1.004      | 0.274        | 0.565         | 2.054       | 7.810          | 1.421        | 1.745        | 2.858         | 7.973       | 8.469        |
| 35            | 30.024             | <0.001      | 0.194         | 0.485      | 0.401        | 0.151         | 0.247       | 2.741          | 0.387        | 0.922        | 1.210         | 2.751       | 3.005        |
| 40            | 7.968              | <0.001      | 0.045         | 0.032      | 0.087        | 0.068         | 0.181       | 0.690          | 0.101        | 0.446        | 0.553         | 0.653       | 0.856        |
| 45            | 2.930              | <0.001      | 0.014         | 0.039      | 0.018        | 0.071         | 0.080       | 0.228          | 0.026        | 0.421        | 0.462         | 0.172       | 0.493        |
| 50            | 1.342              | <0.001      | 0.013         | 0.032      | 0.005        | 0.033         | 0.037       | 0.126          | 0.014        | 0.452        | 0.468         | 0.075       | 0.473        |
| 55            | 1.506              | <0.001      | 0.014         | 0.043      | 0.012        | 0.080         | 0.034       | 0.132          | 0.016        | 0.782        | 0.796         | 0.076       | 0.800        |
| 60            | 1.387              | <0.001      | 0.023         | 0.070      | 0.012        | 0.141         | 0.012       | 0.104          | 0.018        | 1.072        | 1.086         | 0.087       | 1.089        |
| 65            | 0.731              | <0.001      | 0.077         | 0.240      | 0.053        | 0.248         | 0.077       | 0.135          | 0.018        | 1.333        | 1.362         | 0.270       | 1.389        |
| 70            | 0.691              | <0.001      | 0.061         | 0.187      | 0.046        | 0.190         | 0.052       | 0.116          | 0.009        | 0.953        | 0.975         | 0.226       | 1.000        |

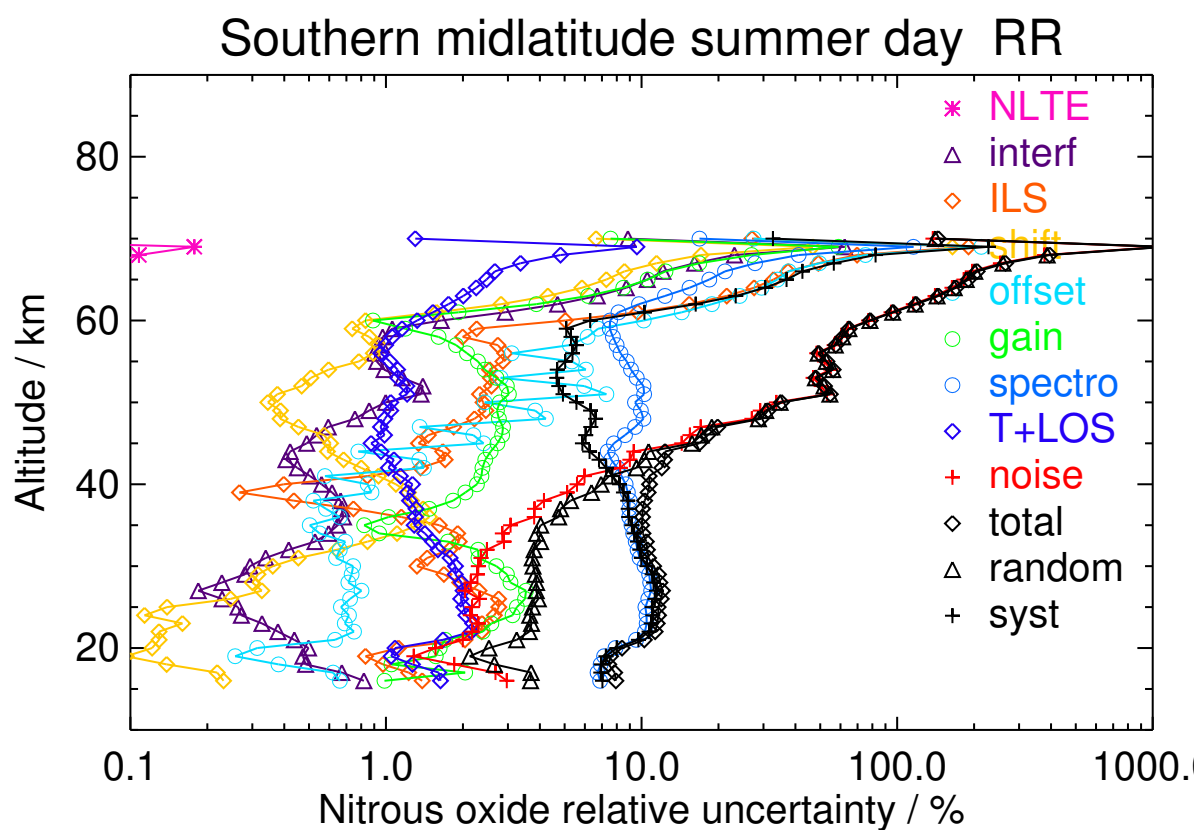

**Figure S227.** V8R\_N2O\_561 Southern midlatitude summer day

**Table S228.** Nitrous oxide error budget for Southern midlatitude summer night. All uncertainties are  $1\sigma$ .

| altitude (km) | mean target (ppbv) | NLTE (ppbv) | interf (ppbv) | ILS (ppbv) | shift (ppbv) | offset (ppbv) | gain (ppbv) | spectro (ppbv) | T+LOS (ppbv) | noise (ppbv) | random (ppbv) | syst (ppbv) | total (ppbv) |
|---------------|--------------------|-------------|---------------|------------|--------------|---------------|-------------|----------------|--------------|--------------|---------------|-------------|--------------|
| 30            | 72.755             | <0.001      | 0.195         | 1.272      | 0.277        | 0.616         | 2.722       | 6.994          | 1.393        | 1.715        | 2.903         | 7.409       | 7.957        |
| 35            | 30.803             | <0.001      | 0.182         | 0.530      | 0.401        | 0.161         | 0.292       | 2.653          | 0.414        | 0.899        | 1.211         | 2.672       | 2.933        |
| 40            | 7.065              | <0.001      | 0.038         | 0.025      | 0.076        | 0.071         | 0.138       | 0.648          | 0.098        | 0.408        | 0.507         | 0.608       | 0.792        |
| 45            | 2.056              | <0.001      | 0.012         | 0.039      | 0.013        | 0.053         | 0.060       | 0.193          | 0.022        | 0.349        | 0.384         | 0.142       | 0.410        |
| 50            | 1.011              | <0.001      | 0.013         | 0.029      | 0.005        | 0.027         | 0.037       | 0.107          | 0.012        | 0.404        | 0.419         | 0.048       | 0.422        |
| 55            | 1.049              | <0.001      | 0.014         | 0.030      | 0.009        | 0.094         | 0.027       | 0.117          | 0.013        | 0.791        | 0.805         | 0.052       | 0.806        |
| 60            | 0.862              | <0.001      | 0.019         | 0.049      | 0.009        | 0.123         | 0.014       | 0.085          | 0.014        | 0.985        | 0.996         | 0.057       | 0.998        |
| 65            | 0.069              | <0.001      | 0.075         | 0.236      | 0.055        | 0.236         | 0.089       | 0.138          | 0.016        | 1.292        | 1.320         | 0.274       | 1.348        |
| 70            | 0.313              | <0.001      | 0.072         | 0.228      | 0.056        | 0.191         | 0.067       | 0.140          | 0.011        | 0.954        | 0.978         | 0.273       | 1.016        |

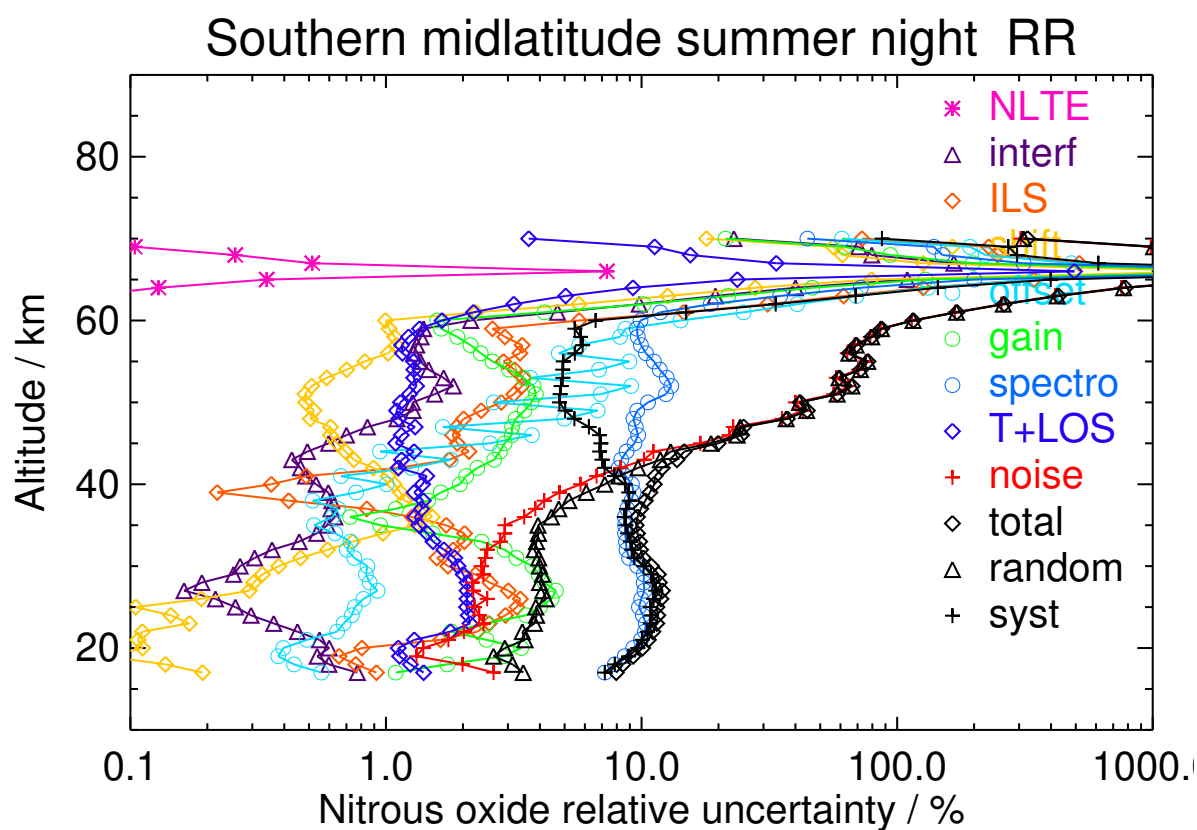

**Figure S228.** V8R\_N2O\_561 Southern midlatitude summer night

**Table S229.** Nitrous oxide error budget for Southern midlatitude autumn day. All uncertainties are  $1\sigma$ .

| altitude (km) | mean target (ppbv) | NLTE (ppbv) | interf (ppbv) | ILS (ppbv) | shift (ppbv) | offset (ppbv) | gain (ppbv) | spectro (ppbv) | T+LOS (ppbv) | noise (ppbv) | random (ppbv) | syst (ppbv) | total (ppbv) |
|---------------|--------------------|-------------|---------------|------------|--------------|---------------|-------------|----------------|--------------|--------------|---------------|-------------|--------------|
| 30            | 73.471             | <0.001      | 0.205         | 1.855      | 0.355        | 0.544         | 2.233       | 9.100          | 1.495        | 1.845        | 3.819         | 9.097       | 9.867        |
| 35            | 26.978             | <0.001      | 0.160         | 0.624      | 0.231        | 0.207         | 0.580       | 3.089          | 0.436        | 1.167        | 2.192         | 2.671       | 3.455        |
| 40            | 14.884             | <0.001      | 0.068         | 0.214      | 0.134        | 0.129         | 0.251       | 1.341          | 0.169        | 0.868        | 1.277         | 1.047       | 1.651        |
| 45            | 7.896              | <0.001      | 0.019         | 0.145      | 0.018        | 0.036         | 0.170       | 0.638          | 0.070        | 0.572        | 0.692         | 0.558       | 0.890        |
| 50            | 3.693              | <0.001      | 0.018         | 0.072      | 0.009        | 0.079         | 0.072       | 0.271          | 0.037        | 0.727        | 0.749         | 0.243       | 0.788        |
| 55            | 2.134              | <0.001      | 0.017         | 0.041      | 0.012        | 0.083         | 0.044       | 0.153          | 0.023        | 1.031        | 1.038         | 0.146       | 1.048        |
| 60            | 1.255              | <0.001      | 0.028         | 0.086      | 0.013        | 0.216         | 0.050       | 0.083          | 0.020        | 1.367        | 1.387         | 0.107       | 1.391        |
| 65            | 0.659              | <0.001      | 0.041         | 0.145      | 0.029        | 0.285         | 0.098       | 0.081          | 0.021        | 1.428        | 1.460         | 0.171       | 1.470        |
| 70            | 0.437              | <0.001      | 0.015         | 0.027      | 0.005        | 0.245         | 0.065       | 0.026          | 0.013        | 1.067        | 1.095         | 0.074       | 1.097        |

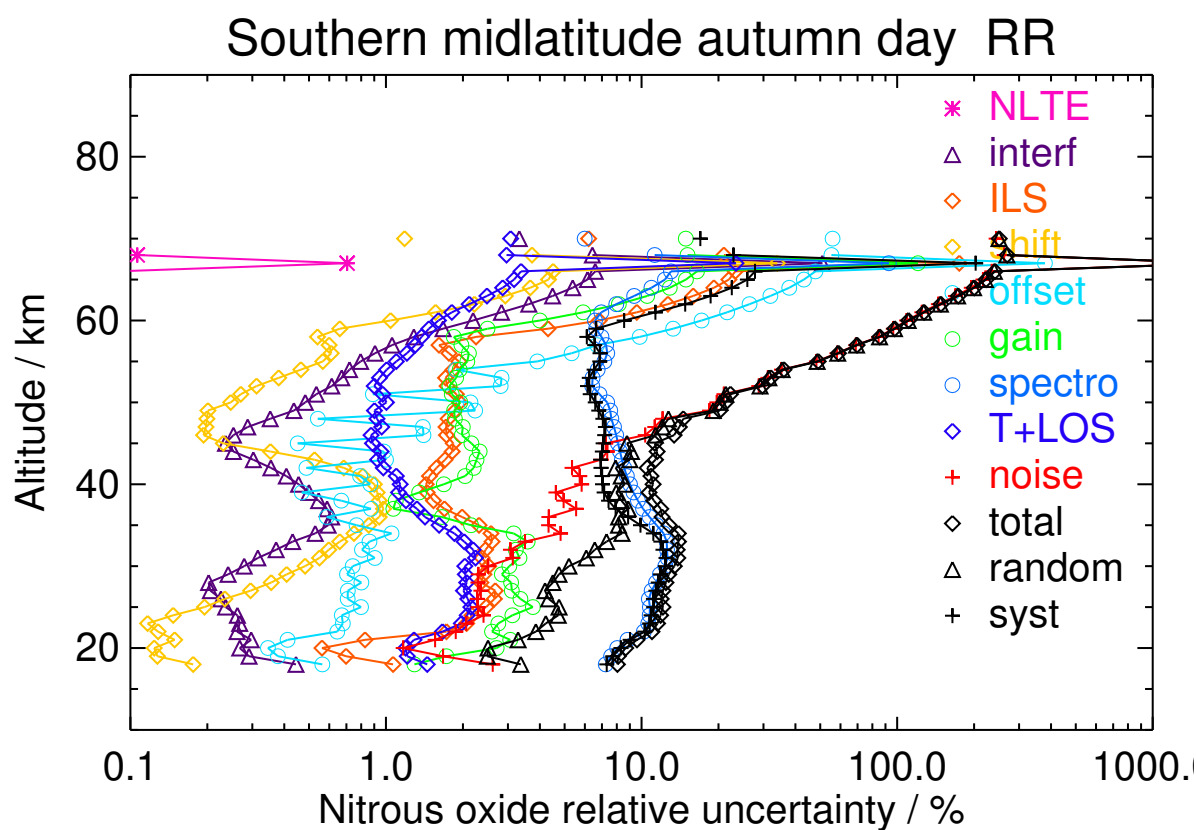

**Figure S229.** V8R\_N2O\_561 Southern midlatitude autumn day



**Table S230.** Nitrous oxide error budget for Southern midlatitude autumn night. All uncertainties are  $1\sigma$ .

| altitude (km) | mean target (ppbv) | NLTE (ppbv) | interf (ppbv) | ILS (ppbv) | shift (ppbv) | offset (ppbv) | gain (ppbv) | spectro (ppbv) | T+LOS (ppbv) | noise (ppbv) | random (ppbv) | syst (ppbv) | total (ppbv) |
|---------------|--------------------|-------------|---------------|------------|--------------|---------------|-------------|----------------|--------------|--------------|---------------|-------------|--------------|
| 30            | 64.901             | <0.001      | 0.166         | 1.549      | 0.305        | 0.561         | 2.522       | 8.002          | 1.479        | 1.834        | 3.561         | 8.130       | 8.876        |
| 35            | 22.302             | <0.001      | 0.125         | 0.517      | 0.197        | 0.164         | 0.388       | 2.520          | 0.380        | 1.061        | 1.737         | 2.259       | 2.850        |
| 40            | 9.227              | <0.001      | 0.043         | 0.115      | 0.080        | 0.117         | 0.148       | 0.737          | 0.110        | 0.741        | 0.885         | 0.616       | 1.078        |
| 45            | 6.193              | <0.001      | 0.017         | 0.098      | 0.018        | 0.028         | 0.108       | 0.419          | 0.049        | 0.514        | 0.585         | 0.351       | 0.682        |
| 50            | 3.563              | <0.001      | 0.017         | 0.067      | 0.008        | 0.078         | 0.066       | 0.256          | 0.034        | 0.710        | 0.735         | 0.217       | 0.766        |
| 55            | 2.147              | <0.001      | 0.017         | 0.039      | 0.011        | 0.082         | 0.038       | 0.141          | 0.022        | 1.037        | 1.043         | 0.132       | 1.052        |
| 60            | 0.858              | <0.001      | 0.029         | 0.083      | 0.014        | 0.210         | 0.068       | 0.079          | 0.020        | 1.355        | 1.374         | 0.109       | 1.378        |
| 65            | 0.246              | <0.001      | 0.041         | 0.129      | 0.025        | 0.285         | 0.118       | 0.070          | 0.023        | 1.438        | 1.469         | 0.166       | 1.479        |
| 70            | 0.671              | <0.001      | 0.018         | 0.036      | 0.010        | 0.226         | 0.097       | 0.033          | 0.016        | 1.036        | 1.062         | 0.095       | 1.066        |

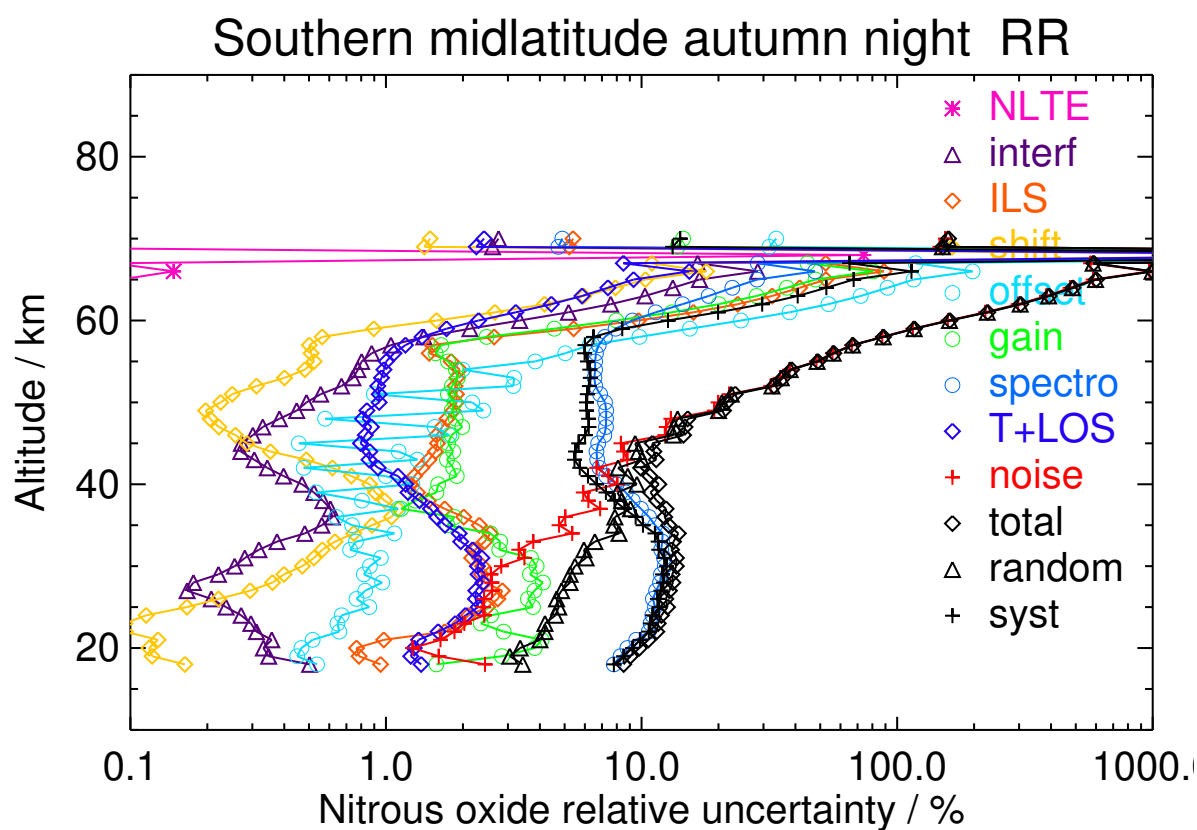

**Figure S230.** V8R\_N2O\_561 Southern midlatitude autumn night

**Table S231.** Nitrous oxide error budget for Southern polar winter day. All uncertainties are  $1\sigma$ .

| altitude (km) | mean target (ppbv) | NLTE (ppbv) | interf (ppbv) | ILS (ppbv) | shift (ppbv) | offset (ppbv) | gain (ppbv) | spectro (ppbv) | T+LOS (ppbv) | noise (ppbv) | random (ppbv) | syst (ppbv) | total (ppbv) |
|---------------|--------------------|-------------|---------------|------------|--------------|---------------|-------------|----------------|--------------|--------------|---------------|-------------|--------------|
| 30            | 14.387             | <0.001      | 0.267         | 0.402      | 0.231        | 0.276         | 0.830       | 1.598          | 0.458        | 1.553        | 1.966         | 1.537       | 2.495        |
| 35            | 2.883              | <0.001      | 0.060         | 0.189      | 0.048        | 0.109         | 0.242       | 0.550          | 0.125        | 0.646        | 0.862         | 0.323       | 0.921        |
| 40            | 1.329              | <0.001      | 0.011         | 0.021      | 0.006        | 0.070         | 0.022       | 0.102          | 0.014        | 0.439        | 0.455         | 0.048       | 0.457        |
| 45            | 1.835              | <0.001      | 0.014         | 0.028      | 0.005        | 0.020         | 0.021       | 0.095          | 0.011        | 0.396        | 0.402         | 0.076       | 0.409        |
| 50            | 1.320              | <0.001      | 0.018         | 0.032      | 0.006        | 0.091         | 0.020       | 0.102          | 0.013        | 0.719        | 0.730         | 0.070       | 0.733        |
| 55            | 1.042              | <0.001      | 0.015         | 0.030      | 0.009        | 0.059         | 0.013       | 0.064          | 0.011        | 0.898        | 0.902         | 0.050       | 0.903        |
| 60            | 0.292              | <0.001      | 0.019         | 0.093      | 0.016        | 0.203         | 0.013       | 0.054          | 0.011        | 1.336        | 1.354         | 0.071       | 1.356        |
| 65            | -0.017             | <0.001      | 0.030         | 0.187      | 0.016        | 0.263         | 0.019       | 0.038          | 0.009        | 1.374        | 1.405         | 0.153       | 1.413        |

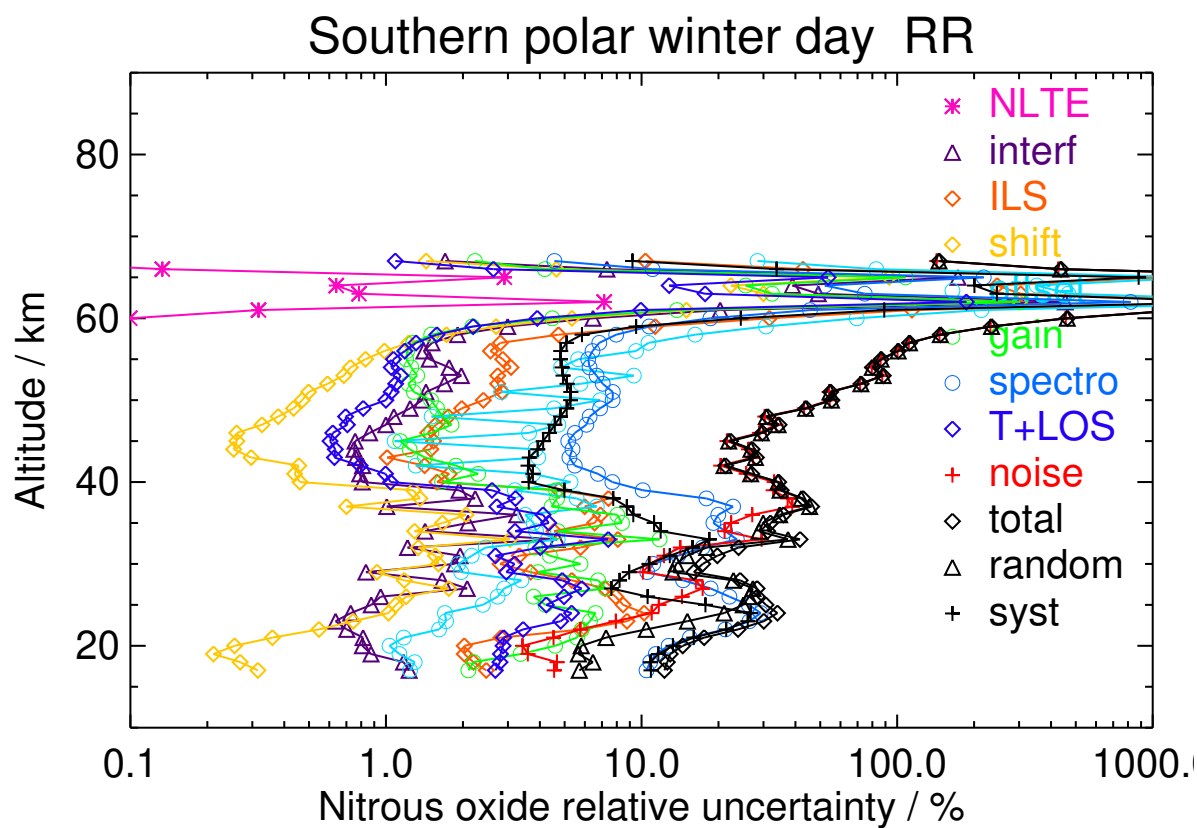

**Figure S231.** V8R\_N2O\_561 Southern polar winter day

**Table S232.** Nitrous oxide error budget for Southern polar winter night. All uncertainties are  $1\sigma$ .

| altitude (km) | mean target (ppbv) | NLTE (ppbv) | interf (ppbv) | ILS (ppbv) | shift (ppbv) | offset (ppbv) | gain (ppbv) | spectro (ppbv) | T+LOS (ppbv) | noise (ppbv) | random (ppbv) | syst (ppbv) | total (ppbv) |
|---------------|--------------------|-------------|---------------|------------|--------------|---------------|-------------|----------------|--------------|--------------|---------------|-------------|--------------|
| 30            | 14.679             | <0.001      | 0.172         | 0.375      | 0.213        | 0.222         | 0.355       | 1.701          | 0.456        | 1.603        | 1.845         | 1.630       | 2.462        |
| 35            | 2.471              | <0.001      | 0.036         | 0.158      | 0.033        | 0.116         | 0.183       | 0.599          | 0.096        | 0.693        | 0.911         | 0.306       | 0.961        |
| 40            | 1.332              | <0.001      | 0.010         | 0.033      | 0.005        | 0.064         | 0.028       | 0.130          | 0.015        | 0.437        | 0.457         | 0.073       | 0.463        |
| 45            | 1.840              | <0.001      | 0.013         | 0.024      | 0.004        | 0.023         | 0.029       | 0.096          | 0.009        | 0.402        | 0.410         | 0.071       | 0.416        |
| 50            | 1.077              | <0.001      | 0.019         | 0.031      | 0.006        | 0.093         | 0.019       | 0.098          | 0.014        | 0.719        | 0.730         | 0.068       | 0.733        |
| 55            | 0.799              | <0.001      | 0.015         | 0.028      | 0.008        | 0.051         | 0.011       | 0.052          | 0.010        | 0.873        | 0.876         | 0.042       | 0.877        |
| 60            | 0.357              | <0.001      | 0.020         | 0.091      | 0.012        | 0.181         | 0.017       | 0.041          | 0.010        | 1.261        | 1.277         | 0.063       | 1.278        |
| 65            | -0.117             | <0.001      | 0.035         | 0.203      | 0.015        | 0.261         | 0.036       | 0.034          | 0.010        | 1.381        | 1.413         | 0.154       | 1.421        |

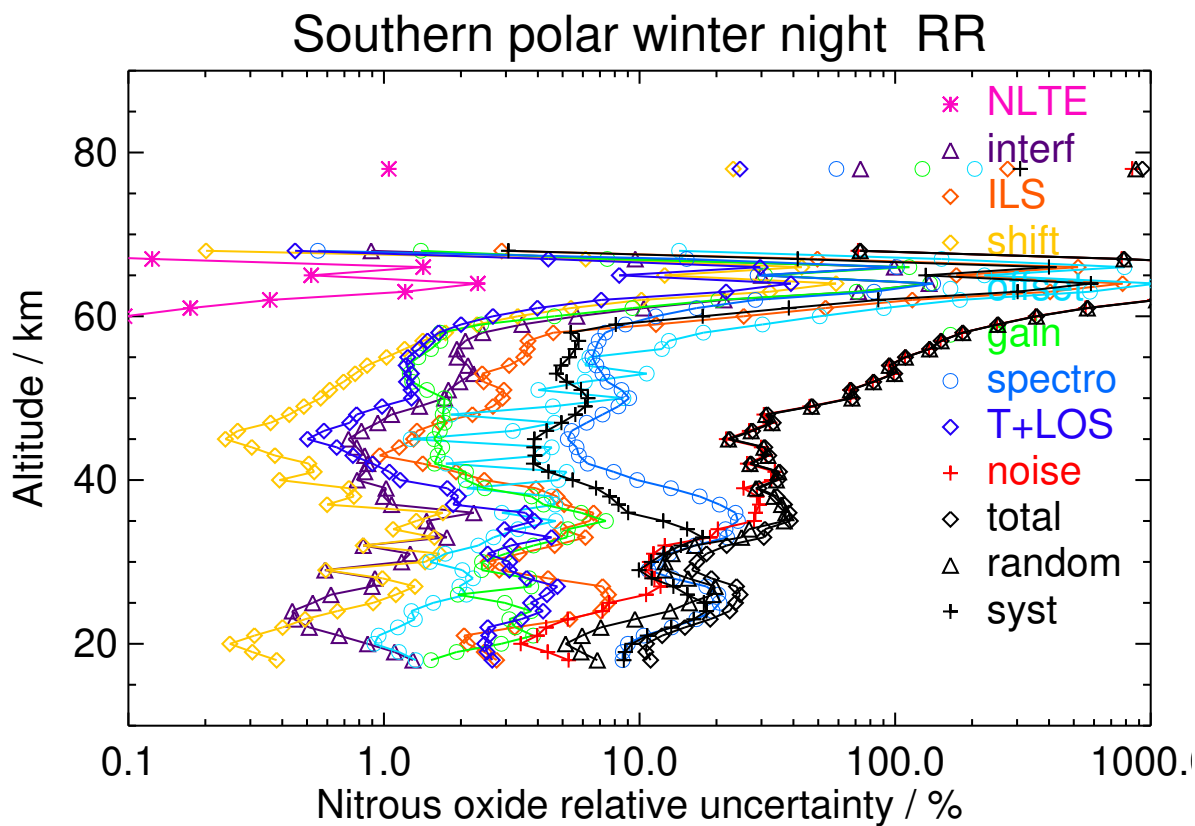

**Figure S232.** V8R\_N2O\_561 Southern polar winter night

**Table S233.** Nitrous oxide error budget for Southern polar spring day. All uncertainties are  $1\sigma$ .

| altitude (km) | mean target (ppbv) | NLTE (ppbv) | interf (ppbv) | ILS (ppbv) | shift (ppbv) | offset (ppbv) | gain (ppbv) | spectro (ppbv) | T+LOS (ppbv) | noise (ppbv) | random (ppbv) | syst (ppbv) | total (ppbv) |
|---------------|--------------------|-------------|---------------|------------|--------------|---------------|-------------|----------------|--------------|--------------|---------------|-------------|--------------|
| 30            | 51.123             | <0.001      | 0.264         | 2.000      | 0.524        | 0.464         | 3.828       | 7.649          | 0.659        | 1.858        | 7.408         | 5.169       | 9.033        |
| 35            | 17.631             | <0.001      | 0.077         | 0.455      | 0.128        | 0.112         | 0.456       | 1.884          | 0.239        | 0.666        | 1.481         | 1.520       | 2.122        |
| 40            | 5.837              | <0.001      | 0.017         | 0.040      | 0.030        | 0.066         | 0.065       | 0.434          | 0.056        | 0.391        | 0.460         | 0.379       | 0.596        |
| 45            | 2.611              | <0.001      | 0.013         | 0.042      | 0.011        | 0.017         | 0.037       | 0.148          | 0.023        | 0.325        | 0.339         | 0.132       | 0.363        |
| 50            | 1.953              | <0.001      | 0.017         | 0.039      | 0.007        | 0.086         | 0.031       | 0.131          | 0.016        | 0.604        | 0.616         | 0.117       | 0.627        |
| 55            | 1.105              | <0.001      | 0.015         | 0.044      | 0.013        | 0.056         | 0.026       | 0.087          | 0.013        | 0.795        | 0.800         | 0.074       | 0.803        |
| 60            | 0.429              | <0.001      | 0.021         | 0.082      | 0.014        | 0.133         | 0.032       | 0.068          | 0.013        | 1.081        | 1.092         | 0.079       | 1.095        |
| 65            | 0.892              | <0.001      | 0.061         | 0.374      | 0.076        | 0.239         | 0.188       | 0.182          | 0.026        | 1.341        | 1.376         | 0.425       | 1.440        |

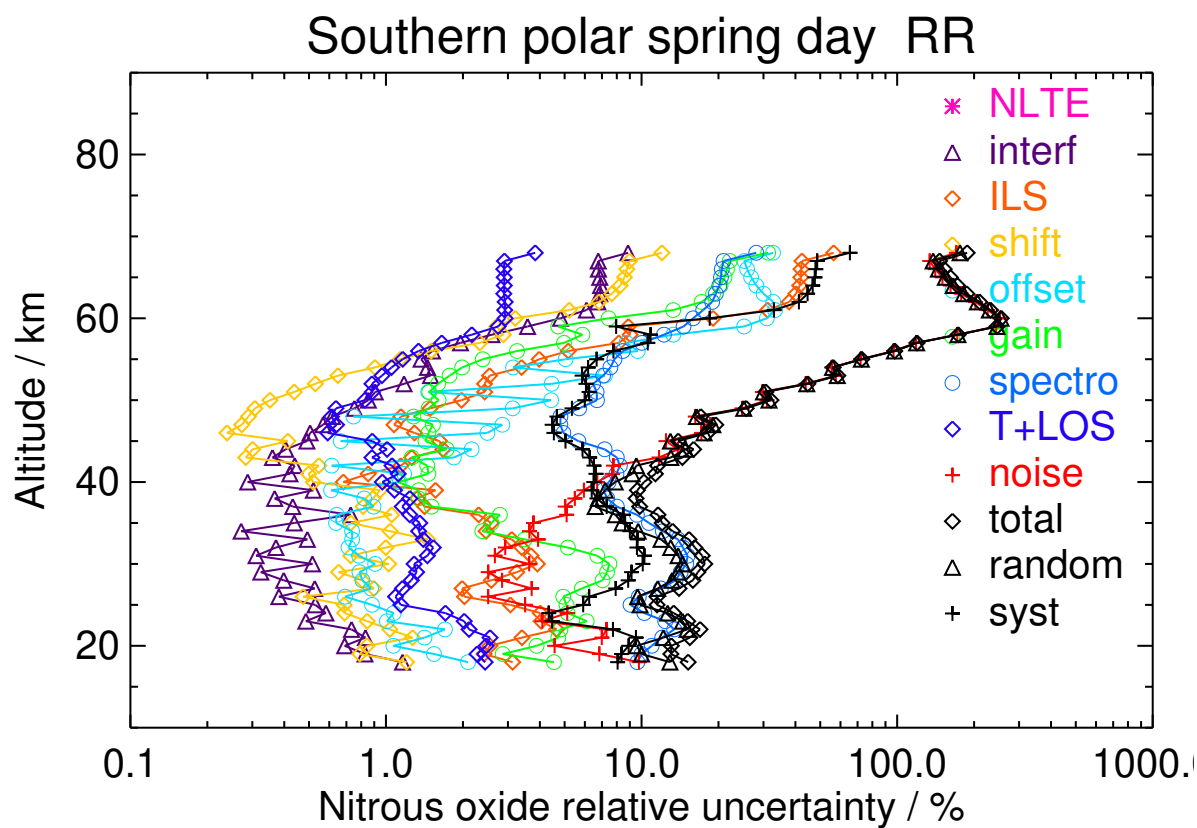

**Figure S233.** V8R\_N2O\_561 Southern polar spring day

**Table S234.** Nitrous oxide error budget for Southern polar spring night. All uncertainties are  $1\sigma$ .

| altitude (km) | mean target (ppbv) | NLTE (ppbv) | interf (ppbv) | ILS (ppbv) | shift (ppbv) | offset (ppbv) | gain (ppbv) | spectro (ppbv) | T+LOS (ppbv) | noise (ppbv) | random (ppbv) | syst (ppbv) | total (ppbv) |
|---------------|--------------------|-------------|---------------|------------|--------------|---------------|-------------|----------------|--------------|--------------|---------------|-------------|--------------|
| 30            | 68.768             | <0.001      | 0.249         | 2.157      | 0.467        | 0.647         | 6.287       | 8.222          | 0.787        | 1.719        | 8.245         | 6.934       | 10.773       |
| 35            | 16.666             | <0.001      | 0.080         | 0.632      | 0.142        | 0.129         | 0.550       | 2.532          | 0.292        | 0.683        | 2.085         | 1.834       | 2.776        |
| 40            | 5.775              | <0.001      | 0.016         | 0.031      | 0.019        | 0.075         | 0.094       | 0.464          | 0.061        | 0.428        | 0.503         | 0.406       | 0.646        |
| 45            | 2.663              | <0.001      | 0.012         | 0.044      | 0.009        | 0.017         | 0.050       | 0.155          | 0.022        | 0.338        | 0.352         | 0.140       | 0.379        |
| 50            | 1.799              | <0.001      | 0.016         | 0.040      | 0.009        | 0.078         | 0.046       | 0.116          | 0.014        | 0.590        | 0.601         | 0.107       | 0.610        |
| 55            | 1.226              | <0.001      | 0.015         | 0.048      | 0.013        | 0.067         | 0.041       | 0.097          | 0.014        | 0.856        | 0.862         | 0.090       | 0.866        |
| 60            | 0.802              | <0.001      | 0.020         | 0.104      | 0.017        | 0.148         | 0.075       | 0.084          | 0.015        | 1.132        | 1.147         | 0.111       | 1.152        |
| 65            | 0.177              | <0.001      | 0.045         | 0.351      | 0.070        | 0.249         | 0.257       | 0.212          | 0.028        | 1.362        | 1.408         | 0.419       | 1.469        |

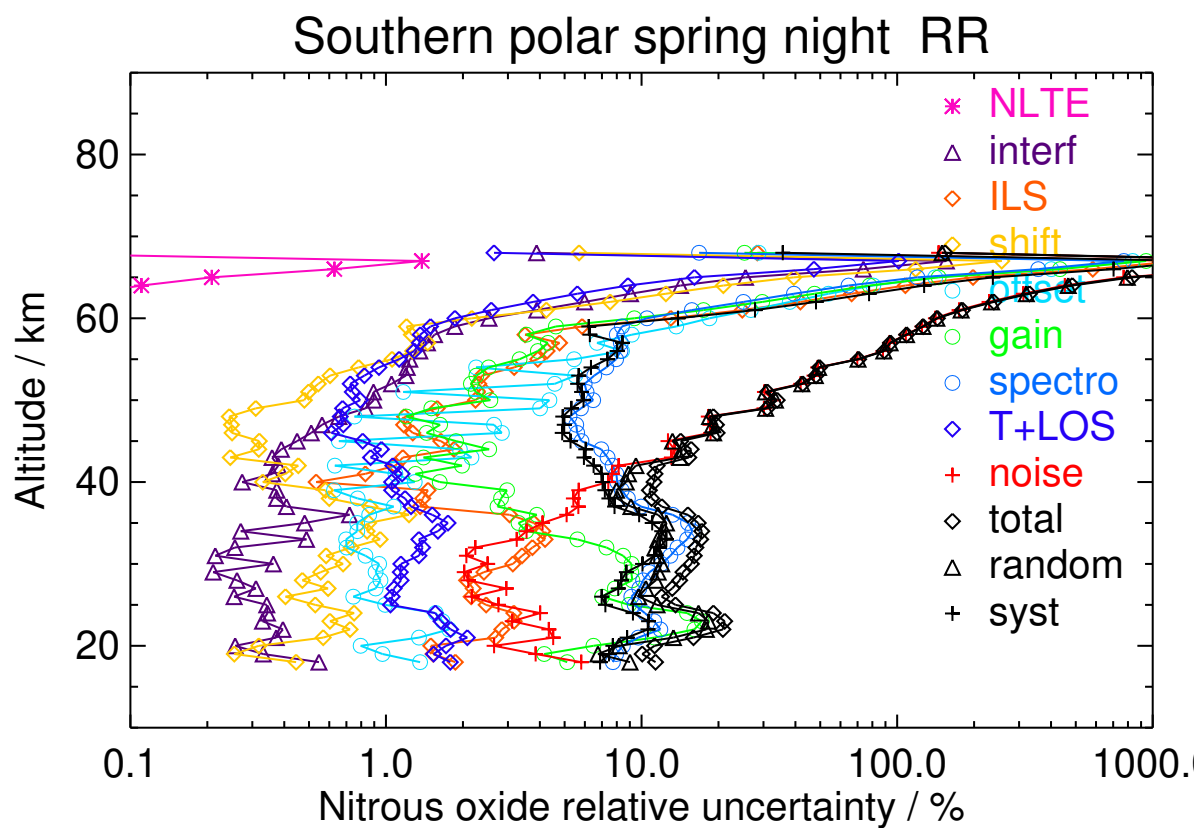

**Figure S234.** V8R\_N2O\_561 Southern polar spring night

**Table S235.** Nitrous oxide error budget for Southern polar summer day. All uncertainties are  $1\sigma$ .

| altitude (km) | mean target (ppbv) | NLTE (ppbv) | interf (ppbv) | ILS (ppbv) | shift (ppbv) | offset (ppbv) | gain (ppbv) | spectro (ppbv) | T+LOS (ppbv) | noise (ppbv) | random (ppbv) | syst (ppbv) | total (ppbv) |
|---------------|--------------------|-------------|---------------|------------|--------------|---------------|-------------|----------------|--------------|--------------|---------------|-------------|--------------|
| 30            | 73.175             | <0.001      | 0.111         | 1.211      | 0.247        | 0.729         | 4.531       | 6.894          | 1.429        | 1.672        | 2.907         | 8.156       | 8.658        |
| 35            | 29.042             | <0.001      | 0.087         | 0.636      | 0.316        | 0.217         | 0.885       | 2.480          | 0.469        | 0.865        | 1.191         | 2.654       | 2.909        |
| 40            | 7.541              | <0.001      | 0.026         | 0.046      | 0.079        | 0.057         | 0.049       | 0.612          | 0.089        | 0.336        | 0.416         | 0.580       | 0.714        |
| 45            | 1.231              | <0.001      | 0.009         | 0.037      | 0.007        | 0.027         | 0.026       | 0.111          | 0.028        | 0.263        | 0.273         | 0.105       | 0.292        |
| 50            | 0.111              | <0.001      | 0.013         | 0.009      | 0.005        | 0.060         | 0.008       | 0.029          | 0.006        | 0.388        | 0.394         | 0.009       | 0.395        |
| 55            | 0.033              | <0.001      | 0.013         | 0.009      | 0.004        | 0.071         | 0.007       | 0.026          | 0.007        | 0.609        | 0.614         | 0.012       | 0.614        |
| 60            | 0.303              | <0.001      | 0.012         | 0.033      | 0.016        | 0.073         | 0.015       | 0.040          | 0.008        | 0.788        | 0.792         | 0.042       | 0.793        |
| 65            | 0.814              | <0.001      | 0.036         | 0.153      | 0.032        | 0.183         | 0.079       | 0.085          | 0.013        | 1.091        | 1.109         | 0.182       | 1.124        |
| 70            | 0.430              | <0.001      | 0.039         | 0.213      | 0.053        | 0.182         | 0.084       | 0.123          | 0.012        | 0.949        | 0.971         | 0.252       | 1.003        |

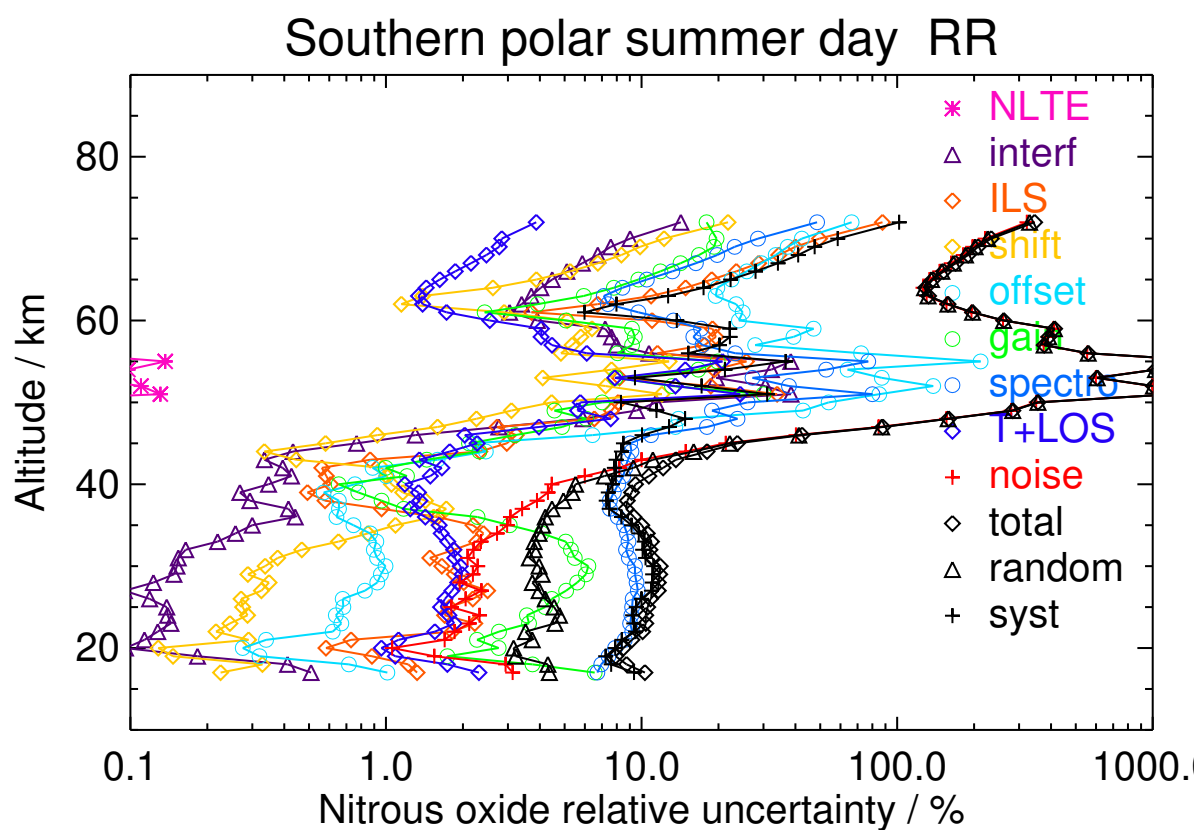

**Figure S235.** V8R\_N2O\_561 Southern polar summer day

**Table S236.** Nitrous oxide error budget for Southern polar summer night. All uncertainties are  $1\sigma$ .

| altitude (km) | mean target (ppbv) | NLTE (ppbv) | interf (ppbv) | ILS (ppbv) | shift (ppbv) | offset (ppbv) | gain (ppbv) | spectro (ppbv) | T+LOS (ppbv) | noise (ppbv) | random (ppbv) | syst (ppbv) | total (ppbv) |
|---------------|--------------------|-------------|---------------|------------|--------------|---------------|-------------|----------------|--------------|--------------|---------------|-------------|--------------|
| 30            | 56.490             | <0.001      | 0.104         | 1.285      | 0.251        | 0.710         | 4.336       | 6.012          | 1.408        | 1.649        | 2.766         | 7.364       | 7.866        |
| 35            | 16.535             | <0.001      | 0.093         | 0.506      | 0.123        | 0.146         | 0.342       | 1.826          | 0.308        | 0.753        | 0.913         | 1.893       | 2.101        |
| 40            | 2.297              | <0.001      | 0.013         | 0.017      | 0.008        | 0.058         | 0.059       | 0.270          | 0.043        | 0.313        | 0.331         | 0.266       | 0.424        |
| 45            | 0.264              | <0.001      | 0.009         | 0.013      | 0.004        | 0.026         | 0.021       | 0.036          | 0.010        | 0.287        | 0.291         | 0.020       | 0.292        |
| 50            | 0.027              | <0.001      | 0.014         | 0.010      | 0.003        | 0.069         | 0.008       | 0.030          | 0.006        | 0.500        | 0.506         | 0.011       | 0.506        |
| 55            | -0.009             | <0.001      | 0.014         | 0.015      | 0.006        | 0.072         | 0.013       | 0.035          | 0.007        | 0.763        | 0.768         | 0.020       | 0.768        |
| 60            | -0.155             | <0.001      | 0.014         | 0.017      | 0.005        | 0.118         | 0.015       | 0.030          | 0.007        | 0.989        | 0.997         | 0.021       | 0.997        |
| 65            | -0.472             | <0.001      | 0.037         | 0.111      | 0.030        | 0.242         | 0.152       | 0.080          | 0.024        | 1.299        | 1.324         | 0.196       | 1.338        |
| 70            | -0.124             | <0.001      | 0.041         | 0.122      | 0.035        | 0.194         | 0.142       | 0.094          | 0.021        | 0.949        | 0.971         | 0.207       | 0.993        |

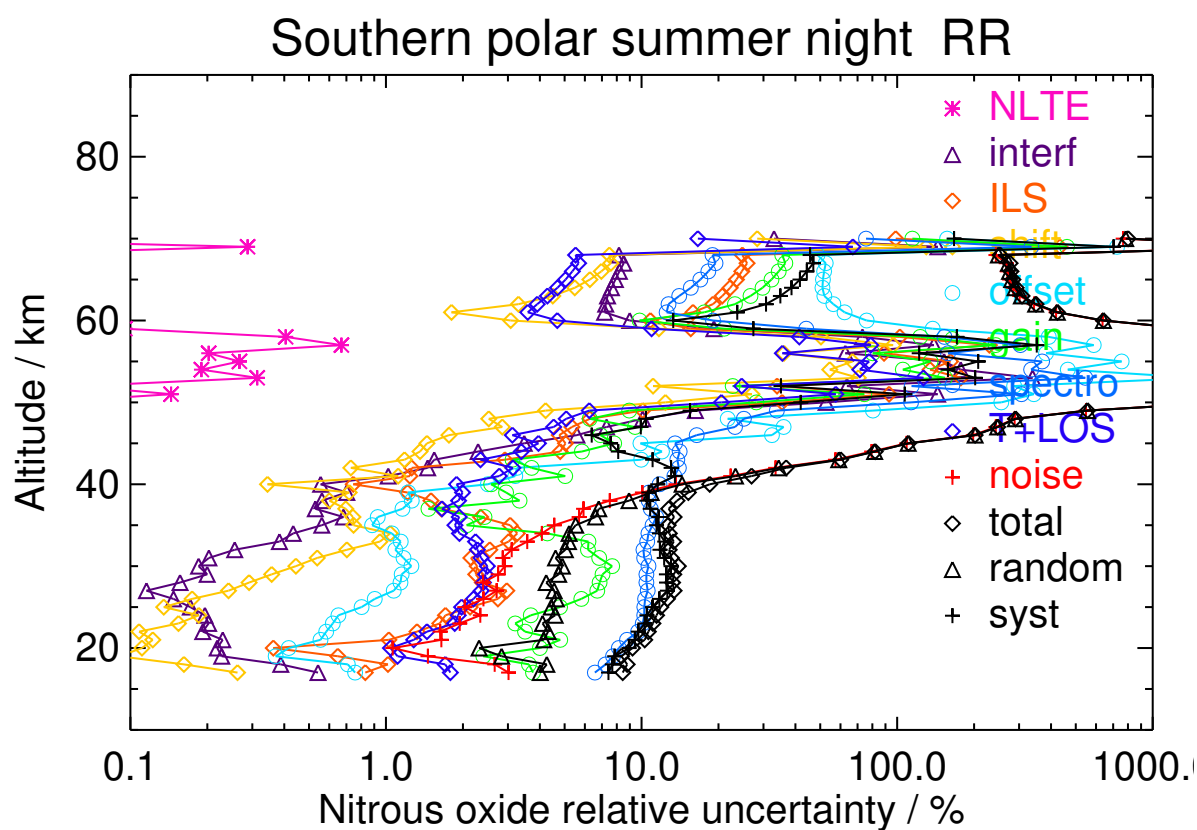

**Figure S236.** V8R\_N2O\_561 Southern polar summer night

**Table S237.** Nitrous oxide error budget for Southern polar autumn day. All uncertainties are  $1\sigma$ .

| altitude (km) | mean target (ppbv) | NLTE (ppbv) | interf (ppbv) | ILS (ppbv) | shift (ppbv) | offset (ppbv) | gain (ppbv) | spectro (ppbv) | T+LOS (ppbv) | noise (ppbv) | random (ppbv) | syst (ppbv) | total (ppbv) |
|---------------|--------------------|-------------|---------------|------------|--------------|---------------|-------------|----------------|--------------|--------------|---------------|-------------|--------------|
| 30            | 32.446             | <0.001      | 0.094         | 1.167      | 0.108        | 0.266         | 1.898       | 5.817          | 0.895        | 1.661        | 3.094         | 5.734       | 6.516        |
| 35            | 3.729              | <0.001      | 0.022         | 0.196      | 0.018        | 0.134         | 0.266       | 0.871          | 0.142        | 0.761        | 0.995         | 0.704       | 1.219        |
| 40            | 0.042              | <0.001      | 0.008         | 0.010      | 0.004        | 0.084         | 0.037       | 0.044          | 0.011        | 0.571        | 0.579         | 0.023       | 0.580        |
| 45            | 0.035              | <0.001      | 0.012         | 0.010      | 0.003        | 0.029         | 0.011       | 0.047          | 0.007        | 0.540        | 0.543         | 0.011       | 0.543        |
| 50            | 1.046              | <0.001      | 0.018         | 0.014      | 0.007        | 0.099         | 0.038       | 0.071          | 0.013        | 0.865        | 0.873         | 0.047       | 0.875        |
| 55            | 0.709              | <0.001      | 0.016         | 0.025      | 0.011        | 0.059         | 0.052       | 0.068          | 0.015        | 0.970        | 0.974         | 0.066       | 0.976        |
| 60            | 0.333              | <0.001      | 0.013         | 0.012      | 0.011        | 0.216         | 0.045       | 0.048          | 0.014        | 1.377        | 1.395         | 0.047       | 1.396        |
| 65            | 0.046              | <0.001      | 0.012         | 0.022      | 0.006        | 0.283         | 0.062       | 0.033          | 0.014        | 1.424        | 1.454         | 0.040       | 1.454        |

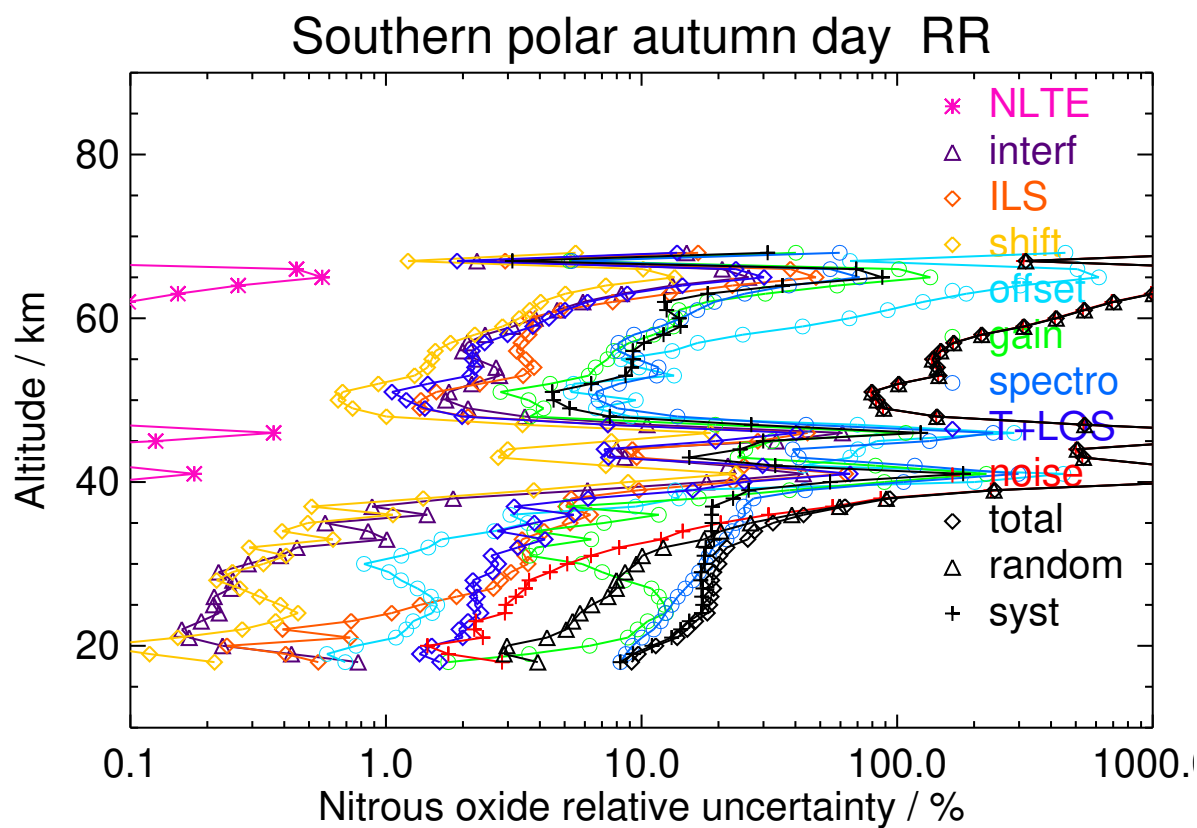

**Figure S237.** V8R\_N2O\_561 Southern polar autumn day



**Table S238.** Nitrous oxide error budget for Southern polar autumn night. All uncertainties are  $1\sigma$ .

| altitude (km) | mean target (ppbv) | NLTE (ppbv) | interf (ppbv) | ILS (ppbv) | shift (ppbv) | offset (ppbv) | gain (ppbv) | spectro (ppbv) | T+LOS (ppbv) | noise (ppbv) | random (ppbv) | syst (ppbv) | total (ppbv) |
|---------------|--------------------|-------------|---------------|------------|--------------|---------------|-------------|----------------|--------------|--------------|---------------|-------------|--------------|
| 30            | 24.587             | <0.001      | 0.117         | 0.914      | 0.122        | 0.280         | 1.265       | 4.600          | 0.840        | 1.647        | 2.773         | 4.408       | 5.208        |
| 35            | 1.919              | <0.001      | 0.023         | 0.159      | 0.018        | 0.118         | 0.256       | 0.624          | 0.118        | 0.686        | 0.876         | 0.462       | 0.990        |
| 40            | 0.180              | <0.001      | 0.008         | 0.010      | 0.003        | 0.085         | 0.027       | 0.058          | 0.011        | 0.595        | 0.604         | 0.027       | 0.604        |
| 45            | 0.184              | <0.001      | 0.012         | 0.010      | 0.003        | 0.029         | 0.016       | 0.049          | 0.008        | 0.555        | 0.558         | 0.018       | 0.558        |
| 50            | 0.686              | <0.001      | 0.018         | 0.014      | 0.006        | 0.096         | 0.030       | 0.057          | 0.011        | 0.866        | 0.873         | 0.036       | 0.874        |
| 55            | 0.940              | <0.001      | 0.016         | 0.017      | 0.010        | 0.061         | 0.045       | 0.062          | 0.016        | 0.994        | 0.998         | 0.056       | 0.999        |
| 60            | 0.600              | <0.001      | 0.013         | 0.012      | 0.008        | 0.212         | 0.033       | 0.058          | 0.014        | 1.361        | 1.378         | 0.040       | 1.379        |
| 65            | 0.058              | <0.001      | 0.013         | 0.019      | 0.005        | 0.283         | 0.088       | 0.041          | 0.021        | 1.427        | 1.457         | 0.074       | 1.459        |

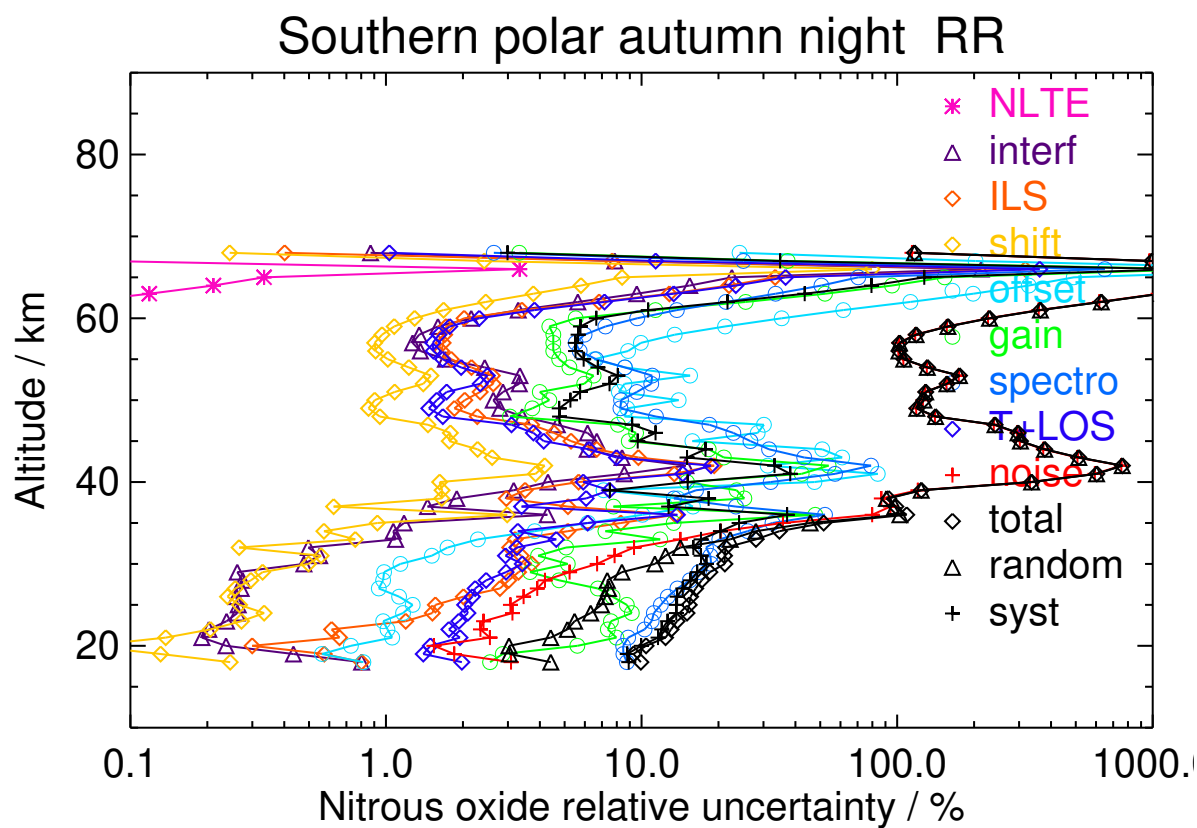

**Figure S238.** V8R\_N2O\_561 Southern polar autumn night

**Table S239.** Nitrous oxide error budget for Northern polar winter day. All uncertainties are  $1\sigma$ .

| altitude (km) | mean target (ppbv) | NLTE (ppbv) | interf (ppbv) | ILS (ppbv) | shift (ppbv) | offset (ppbv) | gain (ppbv) | spectro (ppbv) | T+LOS (ppbv) | noise (ppbv) | random (ppbv) | syst (ppbv) | total (ppbv) |
|---------------|--------------------|-------------|---------------|------------|--------------|---------------|-------------|----------------|--------------|--------------|---------------|-------------|--------------|
| 40            | 6.874              | <0.001      | 0.024         | 0.152      | 0.011        | 0.145         | 0.154       | 0.686          | 0.109        | 1.180        | 1.202         | 0.706       | 1.394        |
| 45            | 1.744              | <0.001      | 0.015         | 0.049      | 0.005        | 0.063         | 0.033       | 0.213          | 0.037        | 0.529        | 0.541         | 0.204       | 0.578        |
| 50            | 0.522              | <0.001      | 0.007         | 0.012      | 0.003        | 0.054         | 0.008       | 0.047          | 0.008        | 0.353        | 0.358         | 0.046       | 0.361        |
| 55            | 0.761              | <0.001      | 0.010         | 0.011      | 0.005        | 0.120         | 0.012       | 0.043          | 0.007        | 0.708        | 0.719         | 0.040       | 0.720        |
| 60            | 2.526              | <0.001      | 0.020         | 0.032      | 0.009        | 0.451         | 0.046       | 0.132          | 0.037        | 2.477        | 2.519         | 0.123       | 2.522        |
| 65            | 5.001              | <0.001      | 0.026         | 0.083      | 0.012        | 1.169         | 0.104       | 0.292          | 0.111        | 6.005        | 6.121         | 0.286       | 6.128        |
| 70            | 5.085              | <0.001      | 0.023         | 0.090      | 0.011        | 1.459         | 0.107       | 0.294          | 0.116        | 7.207        | 7.356         | 0.280       | 7.361        |
| 74            | 4.619              | <0.001      | 0.015         | 0.058      | 0.009        | 1.361         | 0.067       | 0.188          | 0.107        | 6.308        | 6.454         | 0.208       | 6.458        |

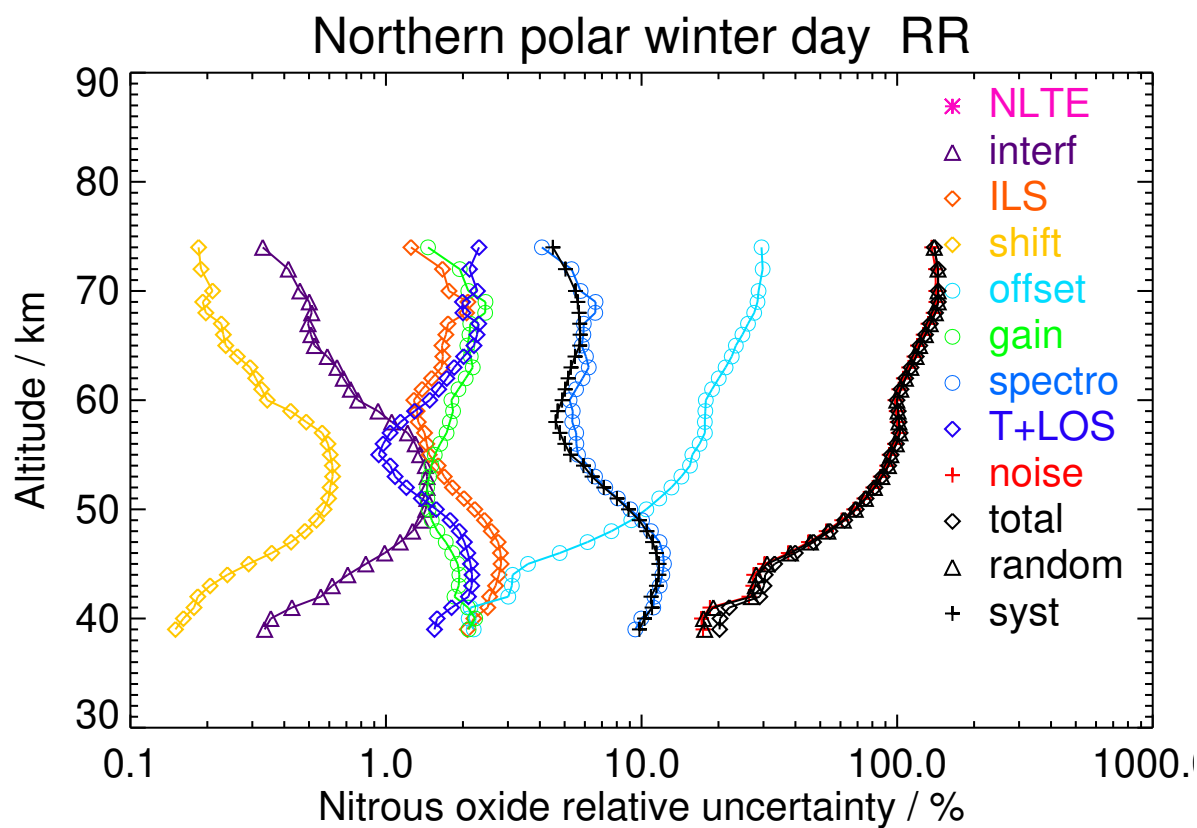

**Figure S239.** V8R\_N2O\_662 Northern polar winter day

**Table S240.** Nitrous oxide error budget for Northern polar winter night. All uncertainties are  $1\sigma$ .

| altitude (km) | mean target (ppbv) | NLTE (ppbv) | interf (ppbv) | ILS (ppbv) | shift (ppbv) | offset (ppbv) | gain (ppbv) | spectro (ppbv) | T+LOS (ppbv) | noise (ppbv) | random (ppbv) | syst (ppbv) | total (ppbv) |
|---------------|--------------------|-------------|---------------|------------|--------------|---------------|-------------|----------------|--------------|--------------|---------------|-------------|--------------|
| 45            | 0.313              | <0.001      | 0.007         | 0.004      | 0.003        | 0.020         | 0.002       | 0.013          | 0.003        | 0.179        | 0.180         | 0.011       | 0.181        |
| 50            | 0.266              | <0.001      | 0.008         | 0.004      | 0.004        | 0.030         | 0.003       | 0.012          | 0.002        | 0.198        | 0.201         | 0.011       | 0.201        |
| 55            | 0.374              | <0.001      | 0.009         | 0.005      | 0.006        | 0.058         | 0.004       | 0.017          | 0.002        | 0.331        | 0.337         | 0.015       | 0.337        |
| 60            | 0.909              | <0.001      | 0.013         | 0.010      | 0.009        | 0.141         | 0.007       | 0.049          | 0.007        | 0.816        | 0.829         | 0.036       | 0.830        |
| 65            | 6.779              | <0.001      | 0.020         | 0.112      | 0.012        | 0.547         | 0.099       | 0.313          | 0.087        | 3.448        | 3.503         | 0.215       | 3.510        |
| 70            | 7.663              | <0.001      | 0.017         | 0.076      | 0.010        | 0.687         | 0.075       | 0.216          | 0.116        | 5.079        | 5.129         | 0.195       | 5.132        |
| 74            | 25.061             | 0.001       | 0.035         | 0.243      | 0.048        | 2.873         | 0.237       | 0.728          | 0.654        | 21.410       | 21.612        | 0.802       | 21.627       |

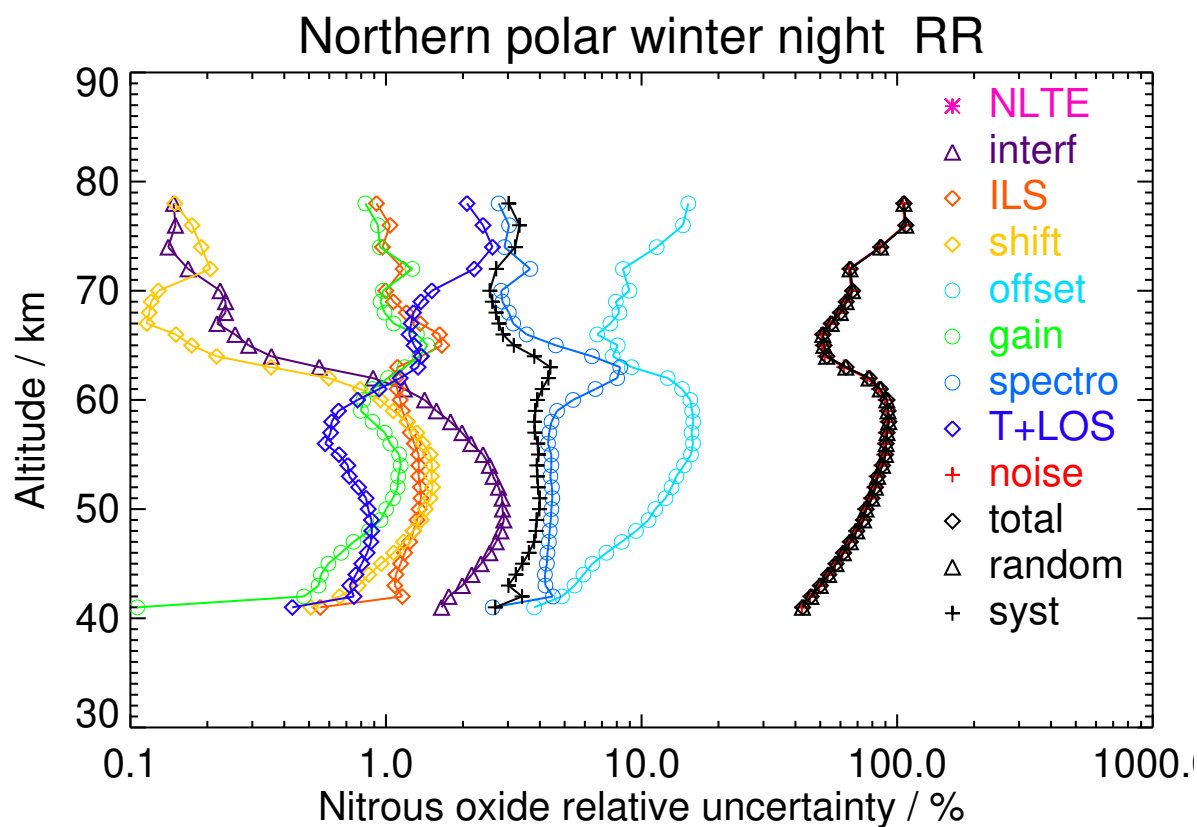

**Figure S240.** V8R\_N2O\_662 Northern polar winter night

**Table S241.** Nitrous oxide error budget for Northern polar spring day. All uncertainties are  $1\sigma$ .

| altitude (km) | mean target (ppbv) | NLTE (ppbv) | interf (ppbv) | ILS (ppbv) | shift (ppbv) | offset (ppbv) | gain (ppbv) | spectro (ppbv) | T+LOS (ppbv) | noise (ppbv) | random (ppbv) | syst (ppbv) | total (ppbv) |
|---------------|--------------------|-------------|---------------|------------|--------------|---------------|-------------|----------------|--------------|--------------|---------------|-------------|--------------|
| 45            | 0.446              | <0.001      | 0.006         | 0.007      | 0.003        | 0.009         | 0.003       | 0.027          | 0.005        | 0.118        | 0.119         | 0.026       | 0.121        |
| 50            | 0.359              | <0.001      | 0.007         | 0.005      | 0.003        | 0.017         | 0.004       | 0.020          | 0.003        | 0.150        | 0.152         | 0.015       | 0.152        |
| 55            | 0.272              | <0.001      | 0.007         | 0.004      | 0.004        | 0.031         | 0.003       | 0.015          | 0.003        | 0.205        | 0.208         | 0.011       | 0.208        |
| 60            | 0.500              | <0.001      | 0.009         | 0.004      | 0.006        | 0.073         | 0.004       | 0.026          | 0.003        | 0.437        | 0.444         | 0.018       | 0.444        |
| 65            | 1.075              | <0.001      | 0.014         | 0.013      | 0.011        | 0.226         | 0.009       | 0.041          | 0.008        | 1.283        | 1.303         | 0.040       | 1.304        |
| 70            | 2.094              | <0.001      | 0.023         | 0.044      | 0.019        | 0.527         | 0.022       | 0.072          | 0.022        | 2.837        | 2.886         | 0.087       | 2.887        |

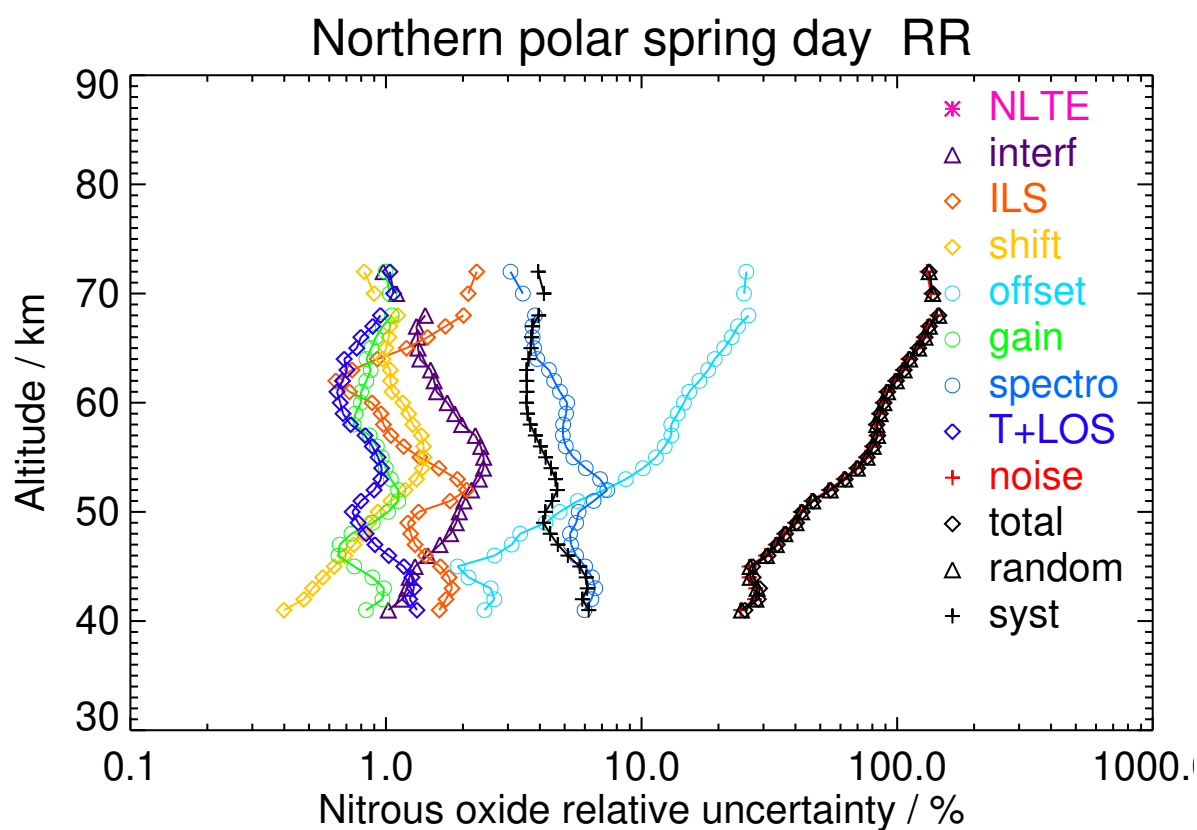

**Figure S241.** V8R\_N2O\_662 Northern polar spring day

**Table S242.** Nitrous oxide error budget for Northern polar spring night. All uncertainties are  $1\sigma$ .

| altitude (km) | mean target (ppbv) | NLTE (ppbv) | interf (ppbv) | ILS (ppbv) | shift (ppbv) | offset (ppbv) | gain (ppbv) | spectro (ppbv) | T+LOS (ppbv) | noise (ppbv) | random (ppbv) | syst (ppbv) | total (ppbv) |
|---------------|--------------------|-------------|---------------|------------|--------------|---------------|-------------|----------------|--------------|--------------|---------------|-------------|--------------|
| 40            | 3.346              | <0.001      | 0.010         | 0.065      | 0.006        | 0.040         | 0.064       | 0.300          | 0.045        | 0.317        | 0.323         | 0.313       | 0.450        |
| 45            | 1.194              | <0.001      | 0.009         | 0.037      | 0.006        | 0.021         | 0.023       | 0.129          | 0.016        | 0.226        | 0.242         | 0.109       | 0.265        |
| 50            | 0.793              | <0.001      | 0.008         | 0.016      | 0.004        | 0.021         | 0.017       | 0.069          | 0.006        | 0.211        | 0.221         | 0.037       | 0.224        |
| 55            | 0.537              | <0.001      | 0.008         | 0.013      | 0.005        | 0.041         | 0.007       | 0.047          | 0.005        | 0.311        | 0.316         | 0.031       | 0.318        |
| 60            | 0.499              | <0.001      | 0.007         | 0.003      | 0.005        | 0.075         | 0.005       | 0.027          | 0.004        | 0.477        | 0.484         | 0.022       | 0.484        |
| 65            | 0.750              | <0.001      | 0.014         | 0.009      | 0.008        | 0.199         | 0.006       | 0.031          | 0.005        | 1.137        | 1.155         | 0.026       | 1.155        |

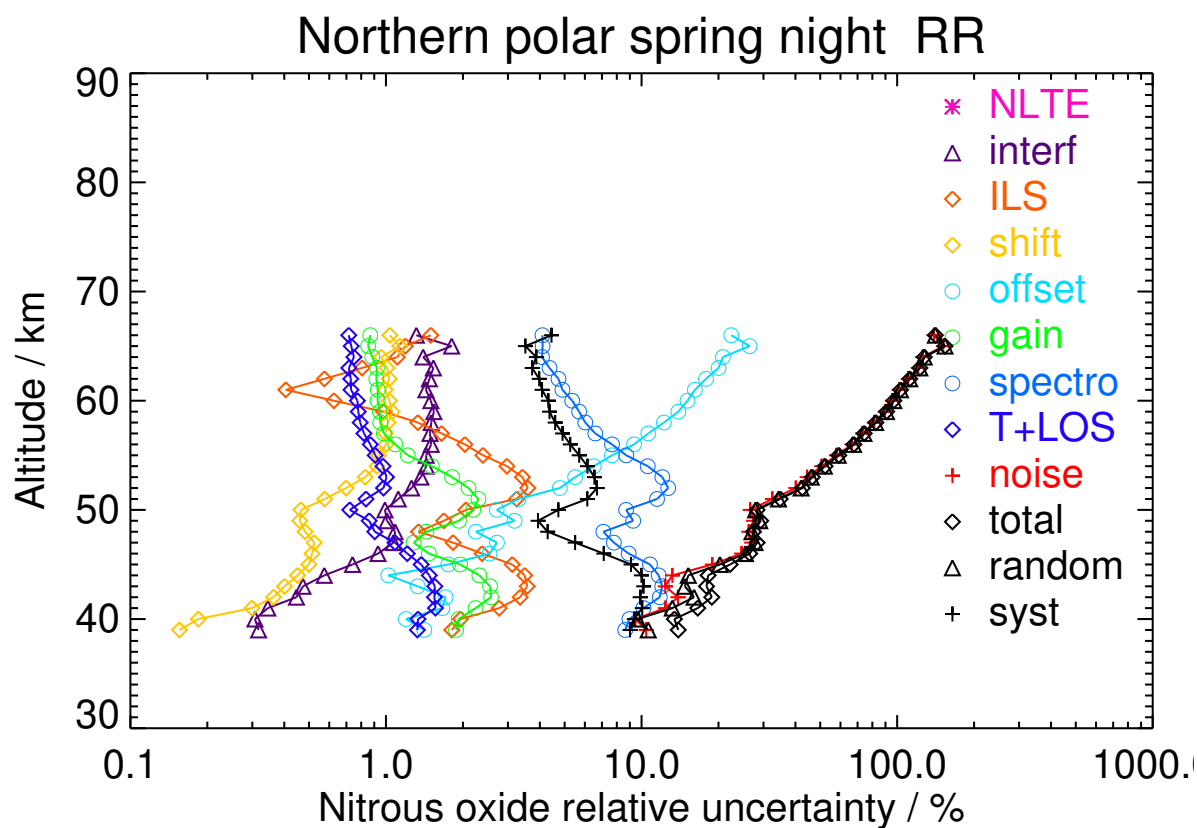

**Figure S242.** V8R\_N2O\_662 Northern polar spring night

**Table S243.** Nitrous oxide error budget for Northern polar summer day. All uncertainties are  $1\sigma$ .

| altitude (km) | mean target (ppbv) | NLTE (ppbv) | interf (ppbv) | ILS (ppbv) | shift (ppbv) | offset (ppbv) | gain (ppbv) | spectro (ppbv) | T+LOS (ppbv) | noise (ppbv) | random (ppbv) | syst (ppbv) | total (ppbv) |
|---------------|--------------------|-------------|---------------|------------|--------------|---------------|-------------|----------------|--------------|--------------|---------------|-------------|--------------|
| 45            | 0.564              | <0.001      | 0.005         | 0.010      | 0.003        | 0.010         | 0.007       | 0.044          | 0.008        | 0.111        | 0.112         | 0.044       | 0.120        |
| 50            | 0.127              | <0.001      | 0.004         | 0.002      | 0.002        | 0.009         | 0.002       | 0.007          | 0.002        | 0.072        | 0.073         | 0.007       | 0.073        |
| 55            | 0.112              | <0.001      | 0.004         | 0.001      | 0.002        | 0.015         | 0.003       | 0.005          | 0.002        | 0.095        | 0.097         | 0.005       | 0.097        |
| 60            | 0.190              | <0.001      | 0.006         | 0.002      | 0.003        | 0.037         | 0.004       | 0.007          | 0.003        | 0.217        | 0.220         | 0.008       | 0.221        |
| 65            | 0.505              | <0.001      | 0.013         | 0.015      | 0.008        | 0.125         | 0.006       | 0.017          | 0.006        | 0.701        | 0.712         | 0.023       | 0.712        |
| 70            | 1.168              | <0.001      | 0.027         | 0.044      | 0.016        | 0.339         | 0.009       | 0.038          | 0.013        | 1.809        | 1.841         | 0.059       | 1.842        |

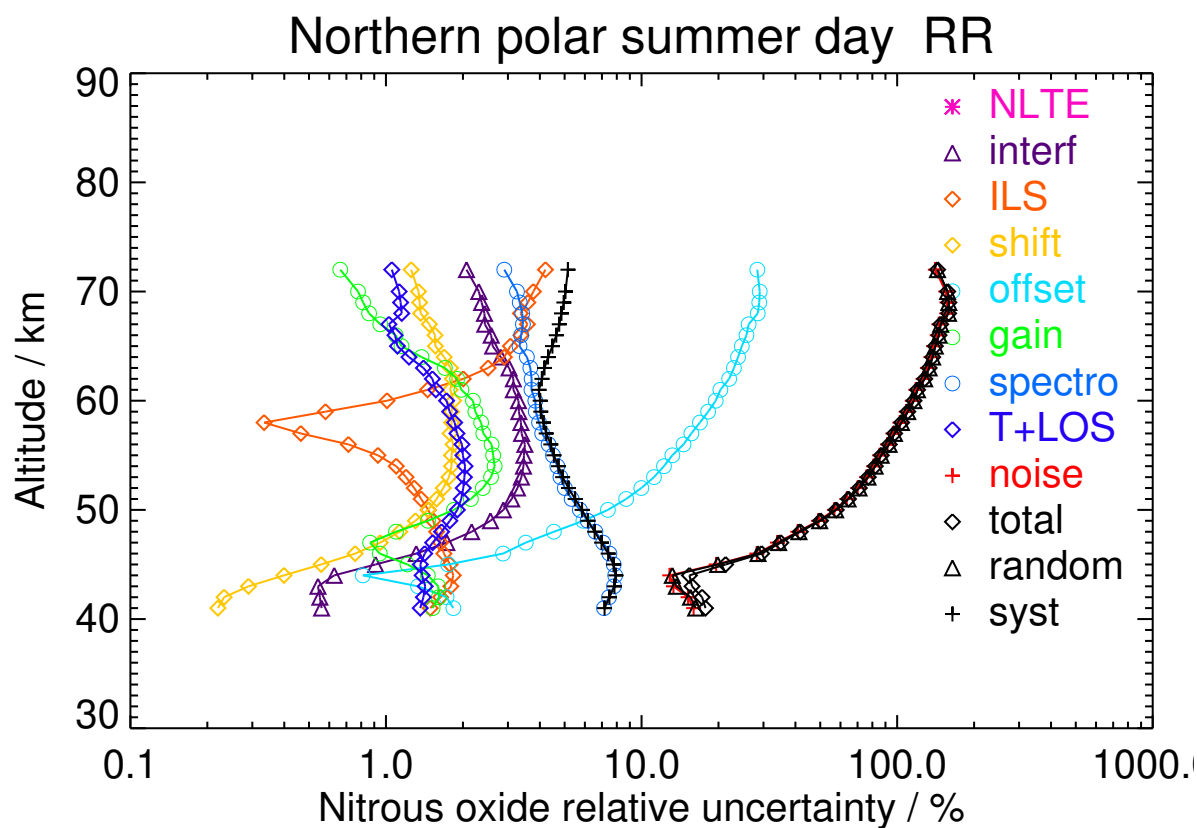

**Figure S243.** V8R\_N2O\_662 Northern polar summer day

**Table S244.** Nitrous oxide error budget for Northern polar summer night. All uncertainties are  $1\sigma$ .

| altitude (km) | mean target (ppbv) | NLTE (ppbv) | interf (ppbv) | ILS (ppbv) | shift (ppbv) | offset (ppbv) | gain (ppbv) | spectro (ppbv) | T+LOS (ppbv) | noise (ppbv) | random (ppbv) | syst (ppbv) | total (ppbv) |
|---------------|--------------------|-------------|---------------|------------|--------------|---------------|-------------|----------------|--------------|--------------|---------------|-------------|--------------|
| 45            | 0.401              | <0.001      | 0.005         | 0.008      | 0.002        | 0.008         | 0.004       | 0.033          | 0.005        | 0.103        | 0.106         | 0.029       | 0.110        |
| 50            | 0.195              | <0.001      | 0.005         | 0.003      | 0.002        | 0.011         | 0.002       | 0.010          | 0.002        | 0.102        | 0.103         | 0.009       | 0.103        |
| 55            | 0.306              | <0.001      | 0.007         | 0.004      | 0.004        | 0.028         | 0.003       | 0.014          | 0.003        | 0.200        | 0.202         | 0.011       | 0.202        |
| 60            | 0.579              | <0.001      | 0.011         | 0.003      | 0.007        | 0.073         | 0.004       | 0.025          | 0.004        | 0.456        | 0.462         | 0.020       | 0.463        |
| 65            | 1.652              | <0.001      | 0.022         | 0.024      | 0.015        | 0.281         | 0.023       | 0.098          | 0.024        | 1.638        | 1.664         | 0.074       | 1.666        |
| 70            | 6.160              | <0.001      | 0.058         | 0.132      | 0.046        | 1.364         | 0.096       | 0.328          | 0.173        | 7.716        | 7.839         | 0.340       | 7.846        |
| 74            | 6.269              | <0.001      | 0.037         | 0.149      | 0.034        | 1.451         | 0.097       | 0.269          | 0.190        | 7.800        | 7.936         | 0.322       | 7.943        |

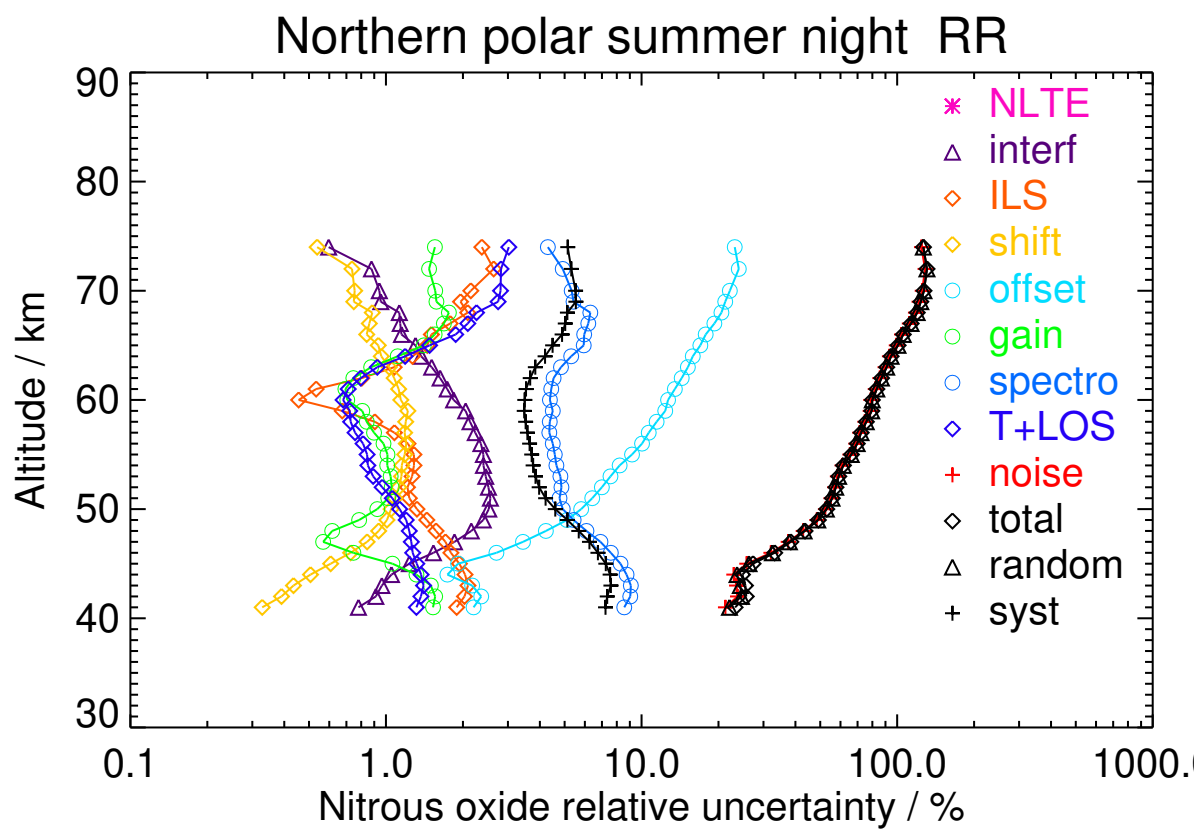

**Figure S244.** V8R\_N2O\_662 Northern polar summer night

**Table S245.** Nitrous oxide error budget for Northern polar autumn day. All uncertainties are  $1\sigma$ .

| altitude (km) | mean target (ppbv) | NLTE (ppbv) | interf (ppbv) | ILS (ppbv) | shift (ppbv) | offset (ppbv) | gain (ppbv) | spectro (ppbv) | T+LOS (ppbv) | noise (ppbv) | random (ppbv) | syst (ppbv) | total (ppbv) |
|---------------|--------------------|-------------|---------------|------------|--------------|---------------|-------------|----------------|--------------|--------------|---------------|-------------|--------------|
| 45            | 0.274              | <0.001      | 0.006         | 0.002      | 0.002        | 0.015         | 0.002       | 0.010          | 0.002        | 0.147        | 0.148         | 0.008       | 0.149        |
| 50            | 0.299              | <0.001      | 0.008         | 0.004      | 0.004        | 0.029         | 0.003       | 0.015          | 0.002        | 0.196        | 0.198         | 0.012       | 0.199        |
| 55            | 0.339              | <0.001      | 0.009         | 0.004      | 0.006        | 0.055         | 0.003       | 0.016          | 0.002        | 0.317        | 0.322         | 0.014       | 0.322        |
| 60            | 0.480              | <0.001      | 0.011         | 0.004      | 0.007        | 0.103         | 0.003       | 0.020          | 0.003        | 0.559        | 0.569         | 0.018       | 0.569        |
| 65            | 1.148              | <0.001      | 0.019         | 0.005      | 0.014        | 0.309         | 0.008       | 0.047          | 0.008        | 1.640        | 1.669         | 0.043       | 1.670        |
| 70            | 1.520              | <0.001      | 0.018         | 0.002      | 0.014        | 0.426         | 0.011       | 0.052          | 0.011        | 2.179        | 2.220         | 0.053       | 2.221        |

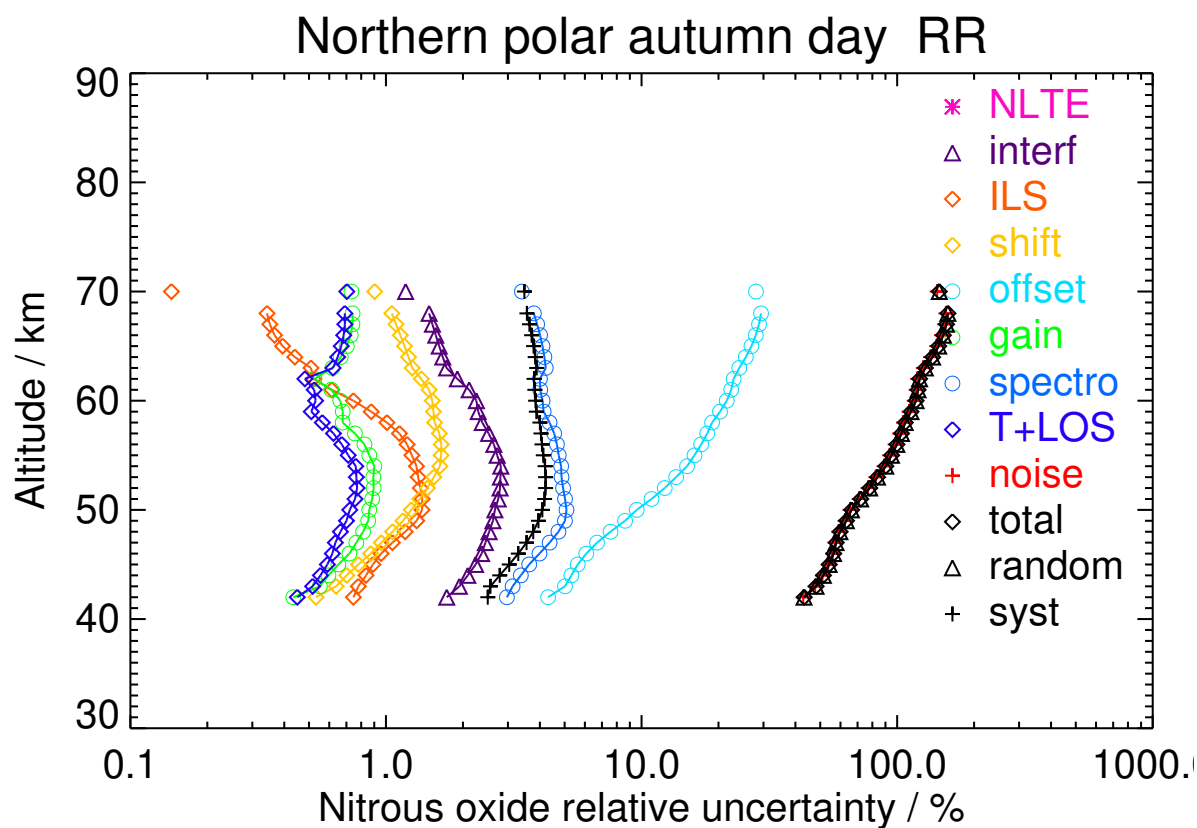

**Figure S245.** V8R\_N2O\_662 Northern polar autumn day



**Table S246.** Nitrous oxide error budget for Northern polar autumn night. All uncertainties are  $1\sigma$ .

| altitude (km) | mean target (ppbv) | NLTE (ppbv) | interf (ppbv) | ILS (ppbv) | shift (ppbv) | offset (ppbv) | gain (ppbv) | spectro (ppbv) | T+LOS (ppbv) | noise (ppbv) | random (ppbv) | syst (ppbv) | total (ppbv) |
|---------------|--------------------|-------------|---------------|------------|--------------|---------------|-------------|----------------|--------------|--------------|---------------|-------------|--------------|
| 45            | 0.631              | <0.001      | 0.009         | 0.023      | 0.004        | 0.020         | 0.019       | 0.075          | 0.004        | 0.249        | 0.261         | 0.029       | 0.263        |
| 50            | 0.588              | <0.001      | 0.011         | 0.009      | 0.005        | 0.037         | 0.005       | 0.034          | 0.003        | 0.308        | 0.312         | 0.026       | 0.313        |
| 55            | 0.558              | <0.001      | 0.010         | 0.008      | 0.006        | 0.066         | 0.004       | 0.026          | 0.003        | 0.421        | 0.426         | 0.024       | 0.427        |
| 60            | 0.834              | <0.001      | 0.010         | 0.009      | 0.007        | 0.125         | 0.008       | 0.038          | 0.004        | 0.750        | 0.760         | 0.033       | 0.761        |
| 65            | 1.404              | <0.001      | 0.013         | 0.012      | 0.008        | 0.274         | 0.017       | 0.061          | 0.011        | 1.591        | 1.615         | 0.055       | 1.616        |
| 70            | 3.669              | <0.001      | 0.025         | 0.041      | 0.009        | 0.810         | 0.060       | 0.184          | 0.046        | 4.796        | 4.866         | 0.155       | 4.868        |
| 74            | 4.125              | <0.001      | 0.022         | 0.028      | 0.007        | 0.955         | 0.051       | 0.146          | 0.054        | 4.925        | 5.017         | 0.157       | 5.020        |

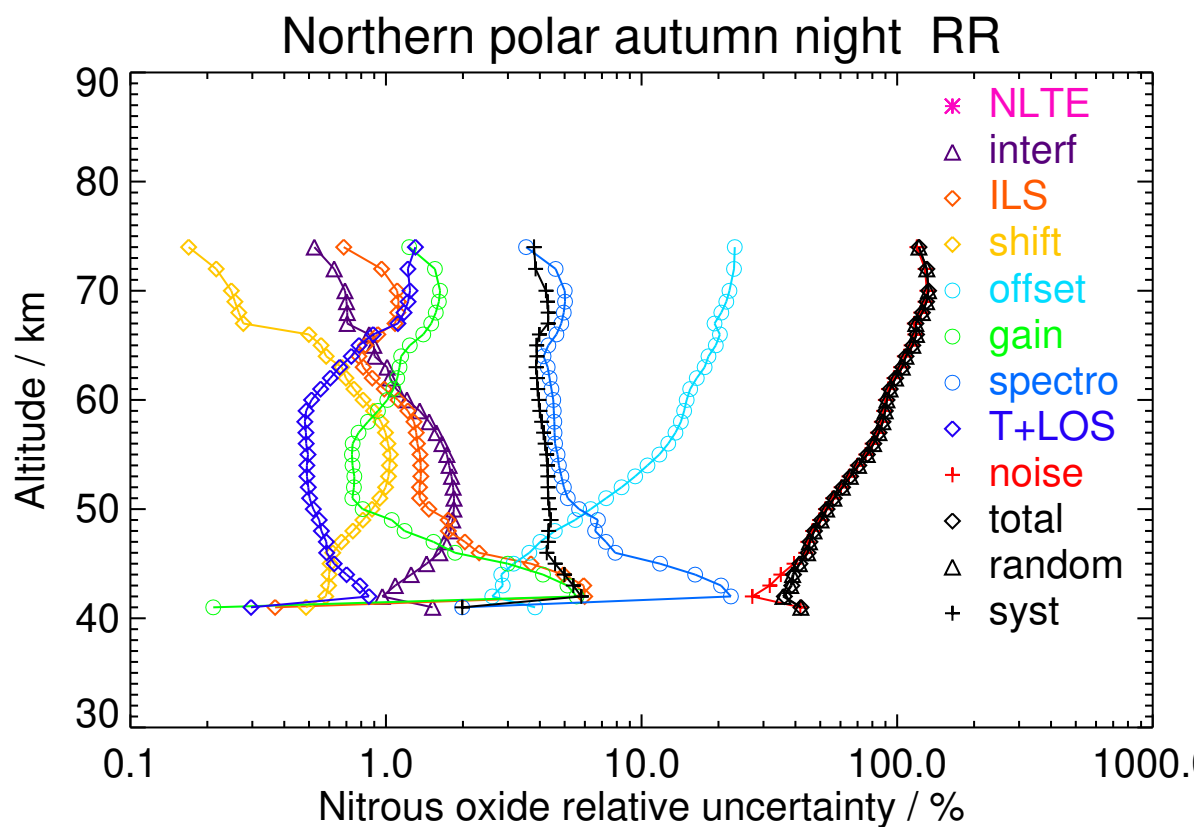

**Figure S246.** V8R\_N2O\_662 Northern polar autumn night

**Table S247.** Nitrous oxide error budget for Northern midlatitude winter day. All uncertainties are  $1\sigma$ .

| altitude (km) | mean target (ppbv) | NLTE (ppbv) | interf (ppbv) | ILS (ppbv) | shift (ppbv) | offset (ppbv) | gain (ppbv) | spectro (ppbv) | T+LOS (ppbv) | noise (ppbv) | random (ppbv) | syst (ppbv) | total (ppbv) |
|---------------|--------------------|-------------|---------------|------------|--------------|---------------|-------------|----------------|--------------|--------------|---------------|-------------|--------------|
| 40            | 9.471              | <0.001      | 0.031         | 0.163      | 0.015        | 0.131         | 0.244       | 0.568          | 0.102        | 0.823        | 0.881         | 0.582       | 1.056        |
| 45            | 3.261              | <0.001      | 0.014         | 0.094      | 0.012        | 0.038         | 0.079       | 0.352          | 0.043        | 0.423        | 0.465         | 0.325       | 0.567        |
| 50            | 0.666              | <0.001      | 0.009         | 0.019      | 0.004        | 0.033         | 0.010       | 0.078          | 0.009        | 0.269        | 0.276         | 0.059       | 0.283        |
| 55            | 0.351              | <0.001      | 0.007         | 0.005      | 0.004        | 0.045         | 0.002       | 0.023          | 0.003        | 0.286        | 0.289         | 0.021       | 0.290        |
| 60            | 0.522              | <0.001      | 0.010         | 0.012      | 0.006        | 0.101         | 0.002       | 0.028          | 0.004        | 0.584        | 0.593         | 0.024       | 0.593        |
| 65            | 1.536              | <0.001      | 0.029         | 0.077      | 0.009        | 0.410         | 0.017       | 0.067          | 0.021        | 2.254        | 2.291         | 0.103       | 2.294        |
| 70            | 2.684              | 0.001       | 0.054         | 0.189      | 0.009        | 0.828         | 0.044       | 0.107          | 0.043        | 4.234        | 4.315         | 0.222       | 4.320        |

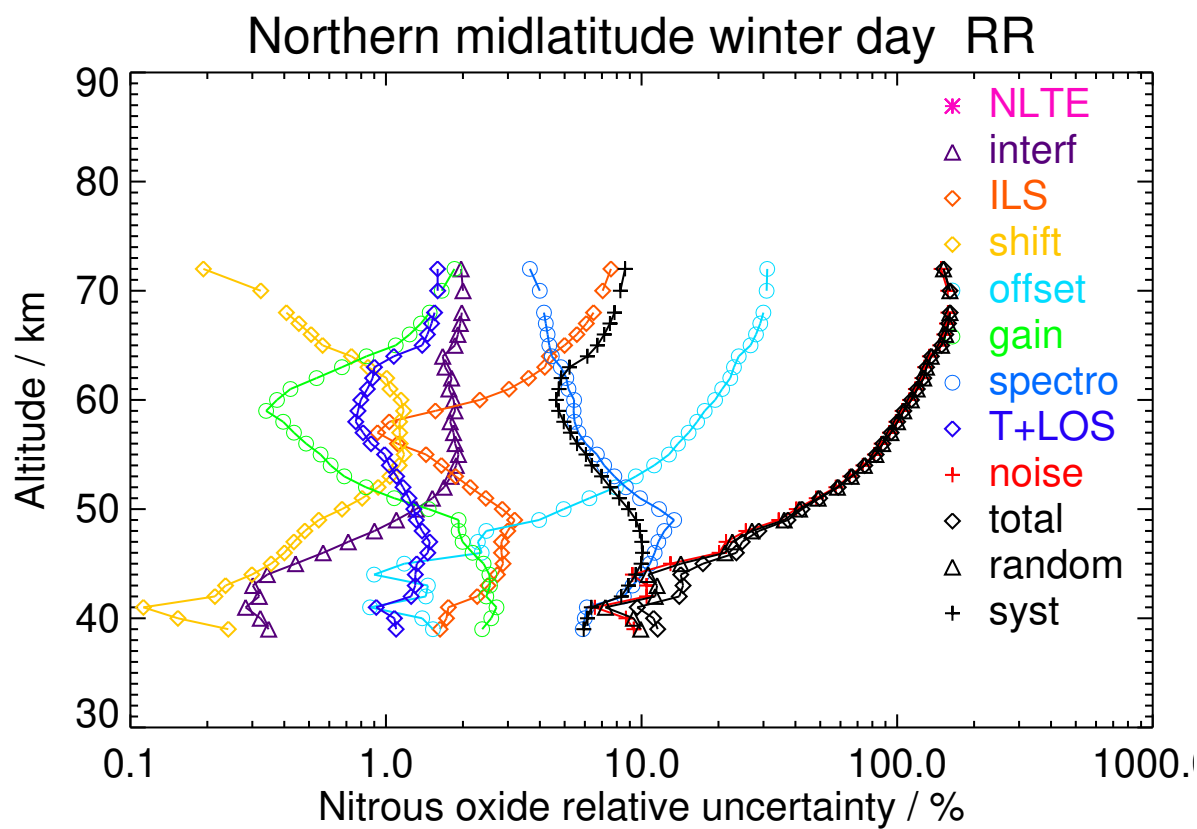

**Figure S247.** V8R\_N2O\_662 Northern midlatitude winter day

**Table S248.** Nitrous oxide error budget for Northern midlatitude winter night. All uncertainties are  $1\sigma$ .

| altitude (km) | mean target (ppbv) | NLTE (ppbv) | interf (ppbv) | ILS (ppbv) | shift (ppbv) | offset (ppbv) | gain (ppbv) | spectro (ppbv) | T+LOS (ppbv) | noise (ppbv) | random (ppbv) | syst (ppbv) | total (ppbv) |
|---------------|--------------------|-------------|---------------|------------|--------------|---------------|-------------|----------------|--------------|--------------|---------------|-------------|--------------|
| 40            | 8.913              | <0.001      | 0.032         | 0.195      | 0.017        | 0.155         | 0.241       | 0.799          | 0.107        | 1.020        | 1.110         | 0.761       | 1.346        |
| 45            | 3.392              | <0.001      | 0.014         | 0.102      | 0.011        | 0.048         | 0.109       | 0.395          | 0.038        | 0.462        | 0.543         | 0.317       | 0.629        |
| 50            | 0.777              | <0.001      | 0.010         | 0.028      | 0.005        | 0.039         | 0.013       | 0.119          | 0.012        | 0.313        | 0.328         | 0.083       | 0.338        |
| 55            | 0.462              | <0.001      | 0.009         | 0.008      | 0.005        | 0.060         | 0.003       | 0.034          | 0.004        | 0.379        | 0.384         | 0.028       | 0.386        |
| 60            | 0.750              | <0.001      | 0.012         | 0.008      | 0.008        | 0.138         | 0.006       | 0.034          | 0.005        | 0.771        | 0.784         | 0.028       | 0.784        |
| 65            | 1.807              | <0.001      | 0.019         | 0.018      | 0.012        | 0.418         | 0.025       | 0.092          | 0.023        | 2.256        | 2.295         | 0.074       | 2.296        |
| 70            | 2.620              | <0.001      | 0.028         | 0.030      | 0.016        | 0.813         | 0.033       | 0.125          | 0.037        | 4.102        | 4.183         | 0.099       | 4.184        |
| 74            | 3.498              | <0.001      | 0.028         | 0.024      | 0.015        | 1.084         | 0.034       | 0.127          | 0.047        | 4.961        | 5.079         | 0.113       | 5.080        |

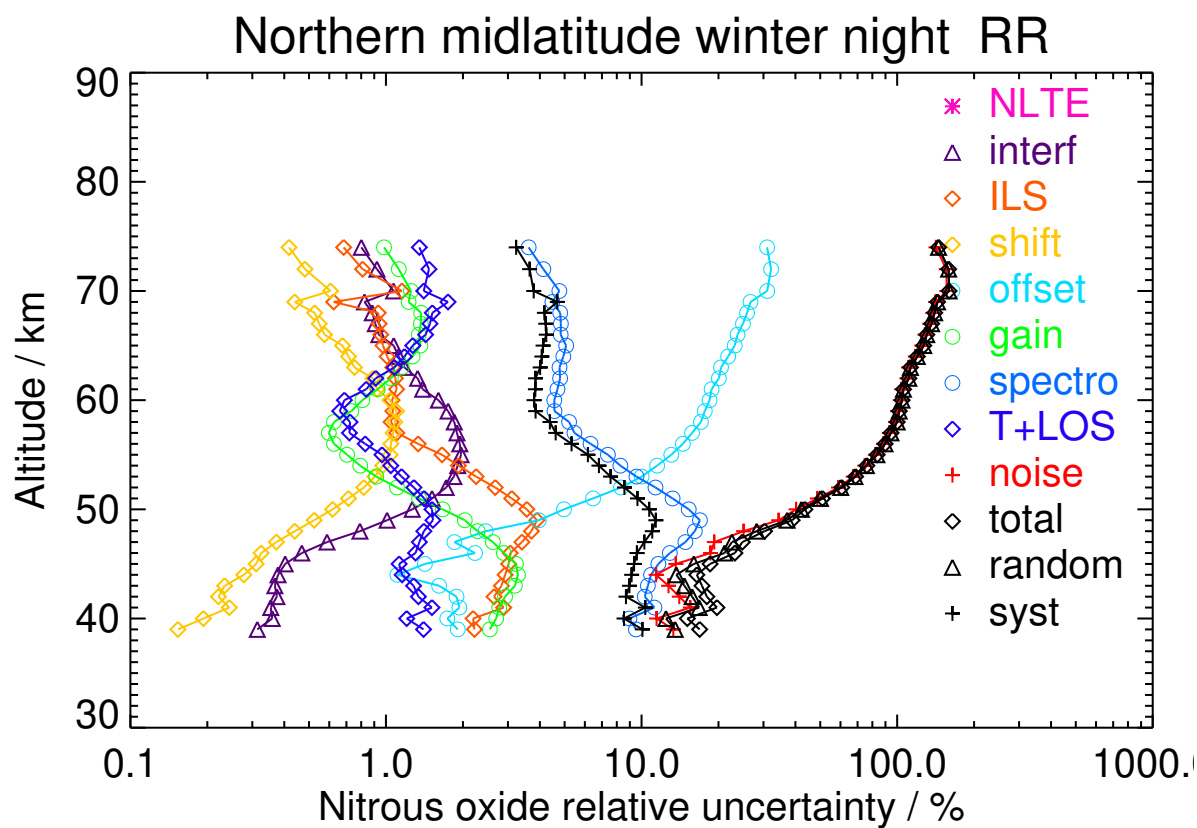

**Figure S248.** V8R\_N2O\_662 Northern midlatitude winter night

**Table S249.** Nitrous oxide error budget for Northern midlatitude spring day. All uncertainties are  $1\sigma$ .

| altitude (km) | mean target (ppbv) | NLTE (ppbv) | interf (ppbv) | ILS (ppbv) | shift (ppbv) | offset (ppbv) | gain (ppbv) | spectro (ppbv) | T+LOS (ppbv) | noise (ppbv) | random (ppbv) | syst (ppbv) | total (ppbv) |
|---------------|--------------------|-------------|---------------|------------|--------------|---------------|-------------|----------------|--------------|--------------|---------------|-------------|--------------|
| 45            | 2.994              | <0.001      | 0.011         | 0.098      | 0.014        | 0.034         | 0.105       | 0.324          | 0.025        | 0.297        | 0.408         | 0.224       | 0.465        |
| 50            | 1.380              | <0.001      | 0.011         | 0.033      | 0.005        | 0.024         | 0.027       | 0.123          | 0.011        | 0.300        | 0.317         | 0.087       | 0.329        |
| 55            | 0.596              | <0.001      | 0.009         | 0.011      | 0.005        | 0.044         | 0.006       | 0.048          | 0.006        | 0.336        | 0.341         | 0.036       | 0.343        |
| 60            | 0.525              | <0.001      | 0.008         | 0.004      | 0.006        | 0.078         | 0.003       | 0.028          | 0.004        | 0.495        | 0.502         | 0.023       | 0.502        |
| 65            | 0.907              | <0.001      | 0.013         | 0.025      | 0.010        | 0.203         | 0.006       | 0.035          | 0.007        | 1.153        | 1.171         | 0.037       | 1.172        |
| 70            | 1.425              | <0.001      | 0.026         | 0.043      | 0.022        | 0.451         | 0.008       | 0.046          | 0.014        | 2.319        | 2.363         | 0.063       | 2.364        |

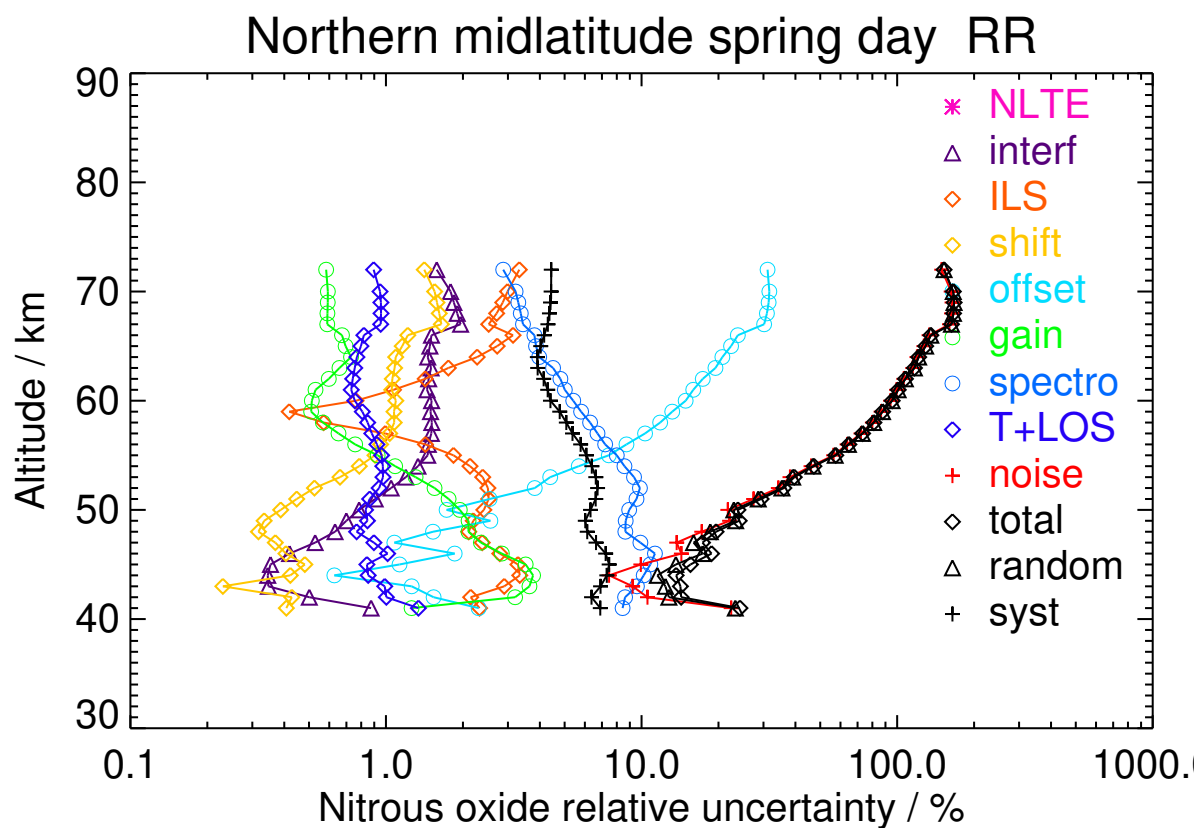

**Figure S249.** V8R\_N2O\_662 Northern midlatitude spring day

**Table S250.** Nitrous oxide error budget for Northern midlatitude spring night. All uncertainties are  $1\sigma$ .

| altitude (km) | mean target (ppbv) | NLTE (ppbv) | interf (ppbv) | ILS (ppbv) | shift (ppbv) | offset (ppbv) | gain (ppbv) | spectro (ppbv) | T+LOS (ppbv) | noise (ppbv) | random (ppbv) | syst (ppbv) | total (ppbv) |
|---------------|--------------------|-------------|---------------|------------|--------------|---------------|-------------|----------------|--------------|--------------|---------------|-------------|--------------|
| 40            | 12.832             | <0.001      | 0.039         | 0.264      | 0.014        | 0.145         | 0.372       | 0.970          | 0.141        | 0.883        | 0.909         | 1.070       | 1.404        |
| 45            | 3.535              | <0.001      | 0.011         | 0.093      | 0.014        | 0.034         | 0.096       | 0.298          | 0.027        | 0.312        | 0.386         | 0.239       | 0.454        |
| 50            | 2.021              | <0.001      | 0.013         | 0.039      | 0.006        | 0.029         | 0.034       | 0.150          | 0.014        | 0.368        | 0.385         | 0.116       | 0.402        |
| 55            | 1.027              | <0.001      | 0.011         | 0.016      | 0.006        | 0.051         | 0.010       | 0.070          | 0.009        | 0.457        | 0.462         | 0.060       | 0.465        |
| 60            | 0.677              | <0.001      | 0.008         | 0.004      | 0.006        | 0.079         | 0.005       | 0.039          | 0.006        | 0.535        | 0.541         | 0.033       | 0.542        |
| 65            | 1.701              | <0.001      | 0.019         | 0.068      | 0.014        | 0.306         | 0.015       | 0.076          | 0.022        | 1.914        | 1.940         | 0.085       | 1.942        |
| 70            | 3.226              | <0.001      | 0.043         | 0.325      | 0.039        | 0.790         | 0.026       | 0.132          | 0.062        | 4.411        | 4.489         | 0.254       | 4.496        |
| 74            | 7.133              | 0.002       | 0.100         | 0.806      | 0.096        | 2.003         | 0.050       | 0.243          | 0.166        | 9.785        | 9.990         | 0.843       | 10.026       |

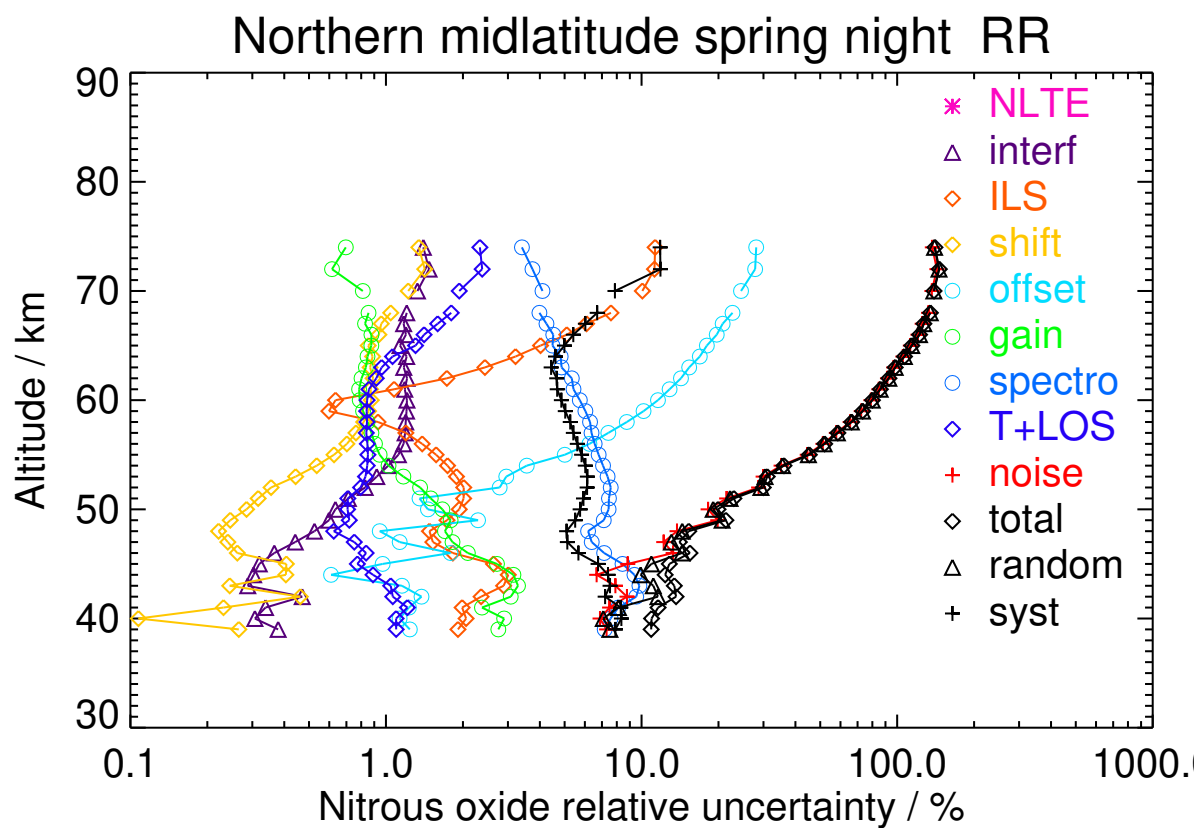

**Figure S250.** V8R\_N2O\_662 Northern midlatitude spring night

**Table S251.** Nitrous oxide error budget for Northern midlatitude summer day. All uncertainties are  $1\sigma$ .

| altitude (km) | mean target (ppbv) | NLTE (ppbv) | interf (ppbv) | ILS (ppbv) | shift (ppbv) | offset (ppbv) | gain (ppbv) | spectro (ppbv) | T+LOS (ppbv) | noise (ppbv) | random (ppbv) | syst (ppbv) | total (ppbv) |
|---------------|--------------------|-------------|---------------|------------|--------------|---------------|-------------|----------------|--------------|--------------|---------------|-------------|--------------|
| 45            | 2.181              | <0.001      | 0.009         | 0.057      | 0.009        | 0.024         | 0.056       | 0.211          | 0.019        | 0.253        | 0.303         | 0.157       | 0.341        |
| 50            | 1.024              | <0.001      | 0.010         | 0.020      | 0.004        | 0.019         | 0.015       | 0.074          | 0.007        | 0.268        | 0.275         | 0.053       | 0.280        |
| 55            | 1.185              | <0.001      | 0.013         | 0.016      | 0.006        | 0.046         | 0.013       | 0.064          | 0.007        | 0.449        | 0.454         | 0.048       | 0.456        |
| 60            | 1.031              | <0.001      | 0.011         | 0.009      | 0.009        | 0.103         | 0.008       | 0.059          | 0.008        | 0.715        | 0.724         | 0.046       | 0.725        |
| 65            | 1.553              | <0.001      | 0.018         | 0.075      | 0.015        | 0.266         | 0.010       | 0.072          | 0.018        | 1.684        | 1.706         | 0.088       | 1.709        |

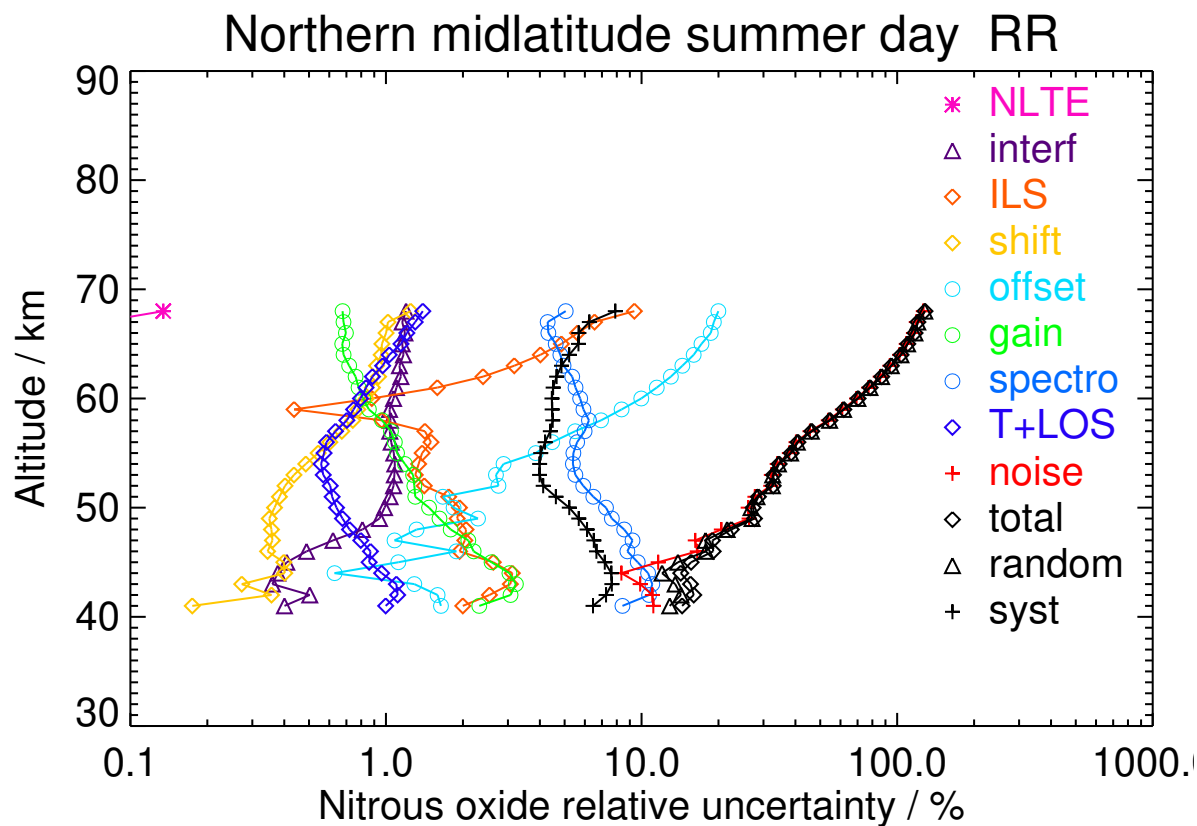

**Figure S251.** V8R\_N2O\_662 Northern midlatitude summer day

**Table S252.** Nitrous oxide error budget for Northern midlatitude summer night. All uncertainties are  $1\sigma$ .

| altitude (km) | mean target (ppbv) | NLTE (ppbv) | interf (ppbv) | ILS (ppbv) | shift (ppbv) | offset (ppbv) | gain (ppbv) | spectro (ppbv) | T+LOS (ppbv) | noise (ppbv) | random (ppbv) | syst (ppbv) | total (ppbv) |
|---------------|--------------------|-------------|---------------|------------|--------------|---------------|-------------|----------------|--------------|--------------|---------------|-------------|--------------|
| 45            | 2.045              | <0.001      | 0.008         | 0.040      | 0.005        | 0.025         | 0.057       | 0.143          | 0.014        | 0.228        | 0.256         | 0.113       | 0.280        |
| 50            | 1.694              | <0.001      | 0.012         | 0.035      | 0.005        | 0.021         | 0.035       | 0.154          | 0.012        | 0.330        | 0.360         | 0.078       | 0.369        |
| 55            | 1.826              | <0.001      | 0.015         | 0.027      | 0.006        | 0.052         | 0.024       | 0.110          | 0.013        | 0.583        | 0.593         | 0.070       | 0.597        |
| 60            | 1.779              | <0.001      | 0.013         | 0.011      | 0.010        | 0.128         | 0.018       | 0.099          | 0.016        | 0.958        | 0.969         | 0.076       | 0.972        |
| 65            | 1.968              | <0.001      | 0.018         | 0.077      | 0.015        | 0.286         | 0.019       | 0.092          | 0.026        | 1.887        | 1.910         | 0.104       | 1.913        |
| 70            | 3.698              | <0.001      | 0.036         | 0.227      | 0.038        | 0.757         | 0.052       | 0.196          | 0.082        | 4.675        | 4.741         | 0.233       | 4.746        |

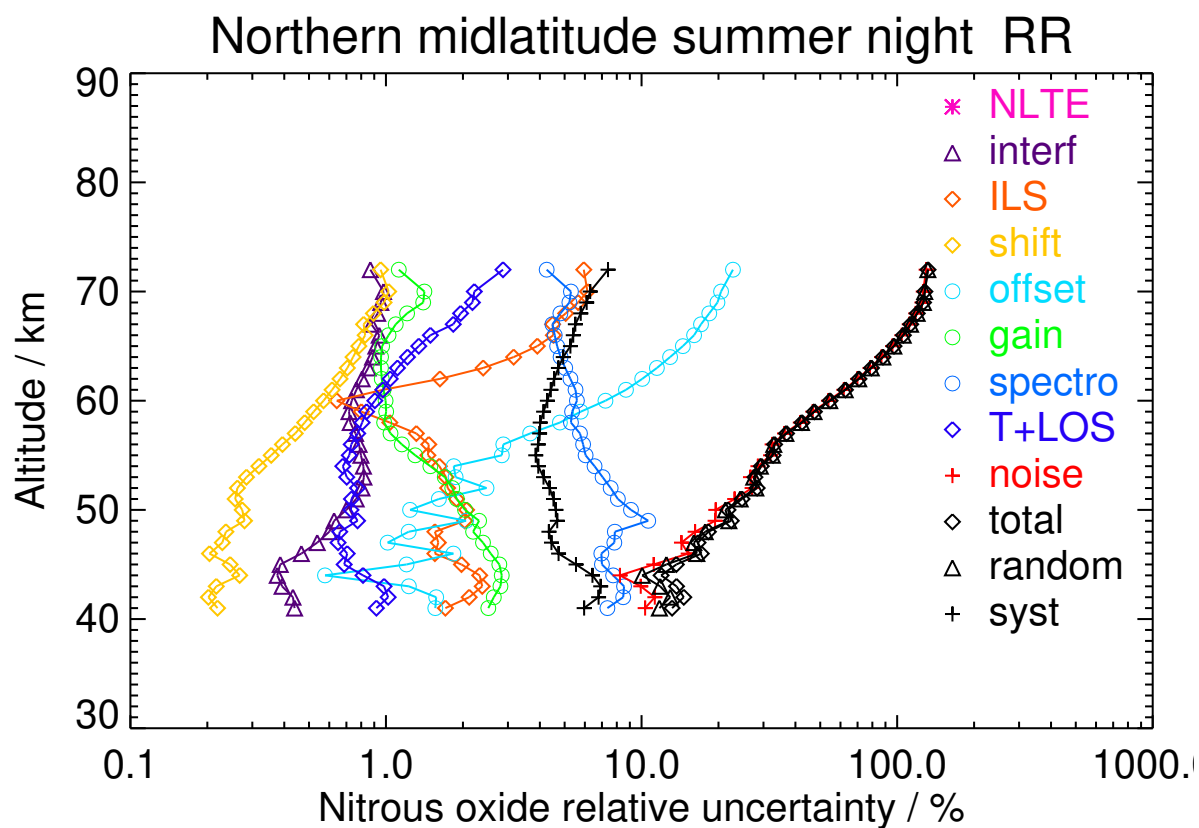

**Figure S252.** V8R\_N2O\_662 Northern midlatitude summer night

**Table S253.** Nitrous oxide error budget for Northern midlatitude autumn day. All uncertainties are  $1\sigma$ .

| altitude (km) | mean target (ppbv) | NLTE (ppbv) | interf (ppbv) | ILS (ppbv) | shift (ppbv) | offset (ppbv) | gain (ppbv) | spectro (ppbv) | T+LOS (ppbv) | noise (ppbv) | random (ppbv) | syst (ppbv) | total (ppbv) |
|---------------|--------------------|-------------|---------------|------------|--------------|---------------|-------------|----------------|--------------|--------------|---------------|-------------|--------------|
| 45            | 5.654              | <0.001      | 0.016         | 0.126      | 0.017        | 0.061         | 0.155       | 0.432          | 0.042        | 0.524        | 0.601         | 0.381       | 0.712        |
| 50            | 2.978              | <0.001      | 0.016         | 0.056      | 0.007        | 0.038         | 0.050       | 0.218          | 0.027        | 0.559        | 0.574         | 0.194       | 0.606        |
| 55            | 1.477              | <0.001      | 0.014         | 0.025      | 0.008        | 0.075         | 0.016       | 0.104          | 0.014        | 0.668        | 0.675         | 0.091       | 0.681        |
| 60            | 1.222              | <0.001      | 0.012         | 0.009      | 0.009        | 0.135         | 0.011       | 0.065          | 0.011        | 0.914        | 0.925         | 0.055       | 0.927        |
| 65            | 2.797              | <0.001      | 0.028         | 0.110      | 0.021        | 0.498         | 0.024       | 0.139          | 0.049        | 3.030        | 3.073         | 0.147       | 3.076        |
| 70            | 3.672              | <0.001      | 0.038         | 0.189      | 0.029        | 0.886         | 0.028       | 0.166          | 0.077        | 5.009        | 5.089         | 0.215       | 5.094        |

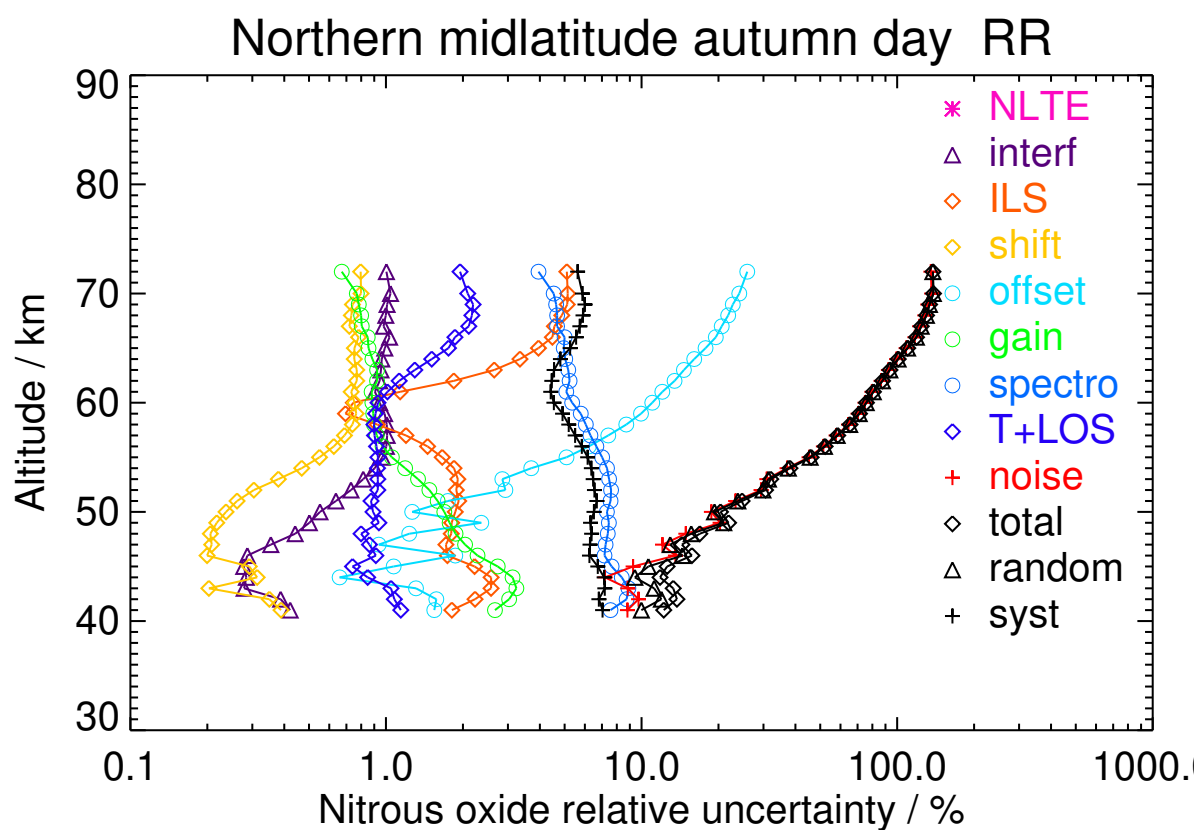

**Figure S253.** V8R\_N2O\_662 Northern midlatitude autumn day



**Table S254.** Nitrous oxide error budget for Northern midlatitude autumn night. All uncertainties are  $1\sigma$ .

| altitude (km) | mean target (ppbv) | NLTE (ppbv) | interf (ppbv) | ILS (ppbv) | shift (ppbv) | offset (ppbv) | gain (ppbv) | spectro (ppbv) | T+LOS (ppbv) | noise (ppbv) | random (ppbv) | syst (ppbv) | total (ppbv) |
|---------------|--------------------|-------------|---------------|------------|--------------|---------------|-------------|----------------|--------------|--------------|---------------|-------------|--------------|
| 45            | 4.921              | <0.001      | 0.018         | 0.184      | 0.036        | 0.054         | 0.208       | 0.586          | 0.047        | 0.486        | 0.689         | 0.434       | 0.815        |
| 50            | 1.730              | <0.001      | 0.013         | 0.042      | 0.006        | 0.037         | 0.032       | 0.159          | 0.016        | 0.426        | 0.442         | 0.126       | 0.460        |
| 55            | 1.092              | <0.001      | 0.013         | 0.017      | 0.007        | 0.067         | 0.011       | 0.070          | 0.008        | 0.549        | 0.555         | 0.060       | 0.558        |
| 60            | 1.037              | <0.001      | 0.012         | 0.006      | 0.008        | 0.124         | 0.009       | 0.053          | 0.008        | 0.833        | 0.843         | 0.044       | 0.844        |
| 65            | 2.514              | <0.001      | 0.017         | 0.038      | 0.012        | 0.340         | 0.049       | 0.163          | 0.039        | 2.183        | 2.215         | 0.095       | 2.217        |
| 70            | 4.474              | <0.001      | 0.023         | 0.024      | 0.014        | 0.807         | 0.051       | 0.176          | 0.084        | 5.033        | 5.099         | 0.167       | 5.101        |
| 74            | 3.949              | <0.001      | 0.016         | 0.017      | 0.003        | 0.788         | 0.026       | 0.110          | 0.074        | 4.294        | 4.366         | 0.114       | 4.368        |

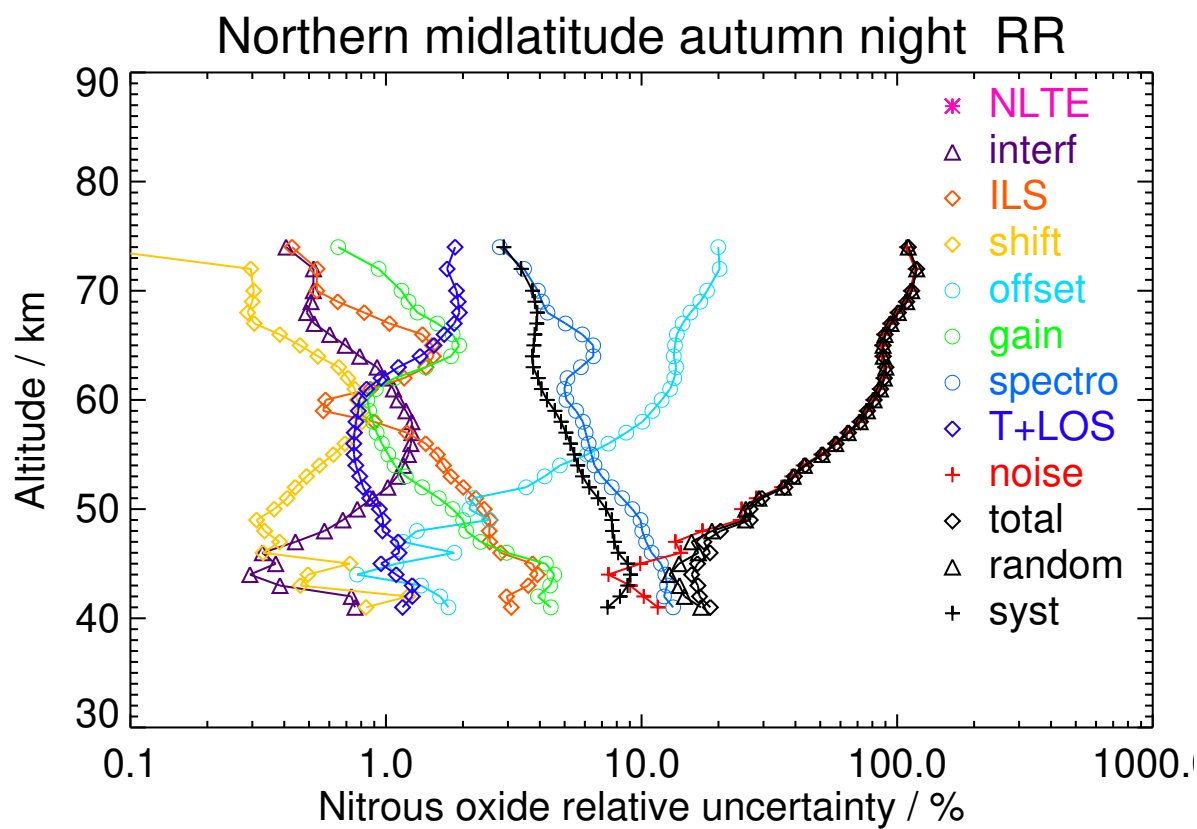

**Figure S254.** V8R\_N2O\_662 Northern midlatitude autumn night

**Table S255.** Nitrous oxide error budget for Tropics day. All uncertainties are  $1\sigma$ .

| altitude (km) | mean target (ppbv) | NLTE (ppbv) | interf (ppbv) | ILS (ppbv) | shift (ppbv) | offset (ppbv) | gain (ppbv) | spectro (ppbv) | T+LOS (ppbv) | noise (ppbv) | random (ppbv) | syst (ppbv) | total (ppbv) |
|---------------|--------------------|-------------|---------------|------------|--------------|---------------|-------------|----------------|--------------|--------------|---------------|-------------|--------------|
| 40            | 24.915             | 0.001       | 0.189         | 0.634      | 0.545        | 0.306         | 0.824       | 2.705          | 0.324        | 1.831        | 2.721         | 2.210       | 3.505        |
| 45            | 7.569              | <0.001      | 0.027         | 0.209      | 0.056        | 0.088         | 0.212       | 0.627          | 0.075        | 0.613        | 0.702         | 0.618       | 0.935        |
| 50            | 2.155              | <0.001      | 0.014         | 0.049      | 0.009        | 0.038         | 0.035       | 0.199          | 0.024        | 0.426        | 0.438         | 0.188       | 0.477        |
| 55            | 0.554              | <0.001      | 0.008         | 0.008      | 0.005        | 0.041         | 0.003       | 0.043          | 0.007        | 0.322        | 0.326         | 0.040       | 0.328        |
| 60            | 0.535              | <0.001      | 0.008         | 0.011      | 0.006        | 0.076         | 0.003       | 0.029          | 0.005        | 0.496        | 0.502         | 0.029       | 0.503        |
| 65            | 1.153              | <0.001      | 0.019         | 0.071      | 0.013        | 0.244         | 0.007       | 0.073          | 0.020        | 1.433        | 1.456         | 0.079       | 1.458        |
| 70            | 6.742              | 0.002       | 0.113         | 0.558      | 0.063        | 1.994         | 0.028       | 0.410          | 0.273        | 10.720       | 10.908        | 0.692       | 10.930       |
| 74            | 10.259             | 0.004       | 0.163         | 0.952      | 0.070        | 3.433         | 0.047       | 0.565          | 0.446        | 16.550       | 16.909        | 1.108       | 16.945       |

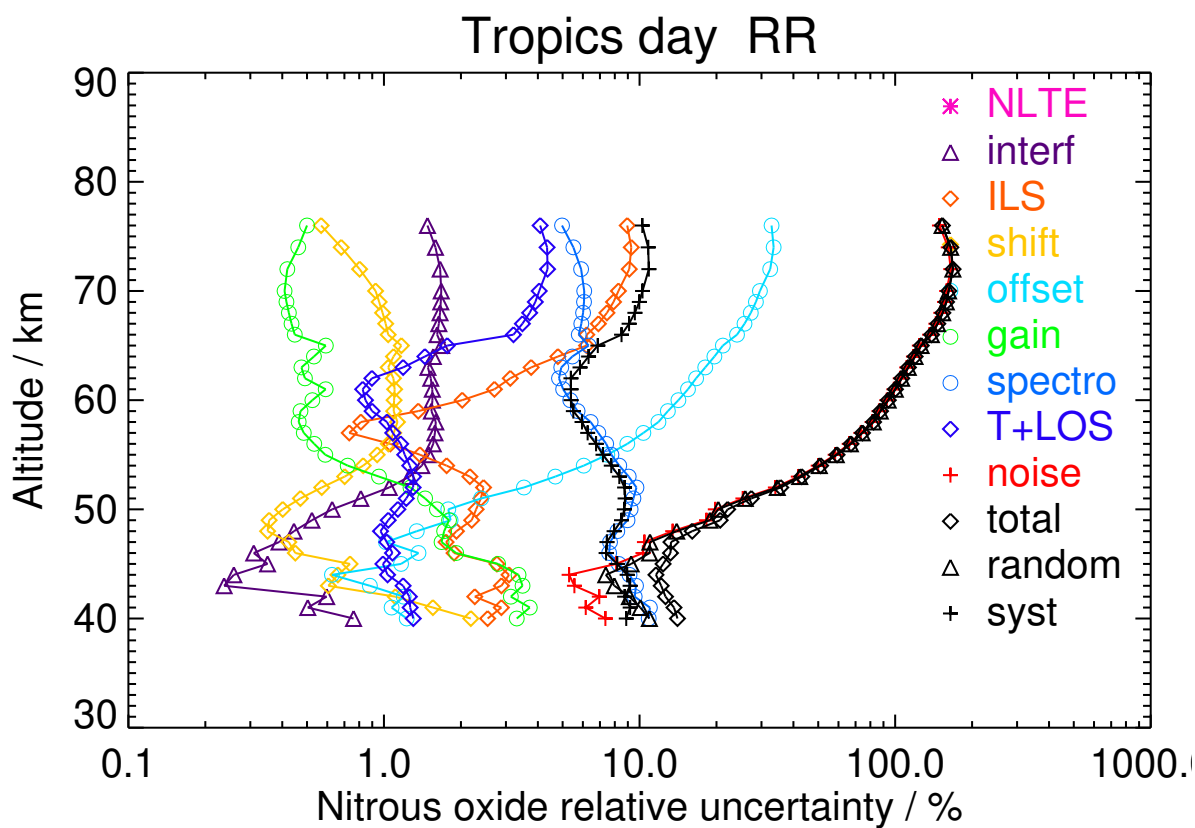

**Figure S255.** V8R\_N2O\_662 Tropics day

**Table S256.** Nitrous oxide error budget for Tropics night. All uncertainties are  $1\sigma$ .

| altitude<br>(km) | mean target<br>(ppbv) | NLTE<br>(ppbv) | interf<br>(ppbv) | ILS<br>(ppbv) | shift<br>(ppbv) | offset<br>(ppbv) | gain<br>(ppbv) | spectro<br>(ppbv) | T+LOS<br>(ppbv) | noise<br>(ppbv) | random<br>(ppbv) | syst<br>(ppbv) | total<br>(ppbv) |
|------------------|-----------------------|----------------|------------------|---------------|-----------------|------------------|----------------|-------------------|-----------------|-----------------|------------------|----------------|-----------------|
| 45               | 8.181                 | <0.001         | 0.033            | 0.264         | 0.066           | 0.078            | 0.255          | 0.690             | 0.082           | 0.615           | 0.707            | 0.713          | 1.004           |
| 50               | 2.491                 | <0.001         | 0.013            | 0.065         | 0.010           | 0.043            | 0.046          | 0.238             | 0.026           | 0.432           | 0.454            | 0.216          | 0.502           |
| 55               | 0.687                 | <0.001         | 0.009            | 0.014         | 0.005           | 0.043            | 0.006          | 0.058             | 0.008           | 0.359           | 0.363            | 0.051          | 0.366           |
| 60               | 0.692                 | <0.001         | 0.008            | 0.008         | 0.007           | 0.077            | 0.005          | 0.040             | 0.006           | 0.534           | 0.540            | 0.030          | 0.541           |
| 65               | 2.761                 | <0.001         | 0.031            | 0.137         | 0.015           | 0.403            | 0.015          | 0.141             | 0.045           | 2.582           | 2.616            | 0.156          | 2.621           |
| 70               | 3.612                 | 0.001          | 0.048            | 0.322         | 0.018           | 0.717            | 0.051          | 0.147             | 0.079           | 4.286           | 4.349            | 0.329          | 4.362           |

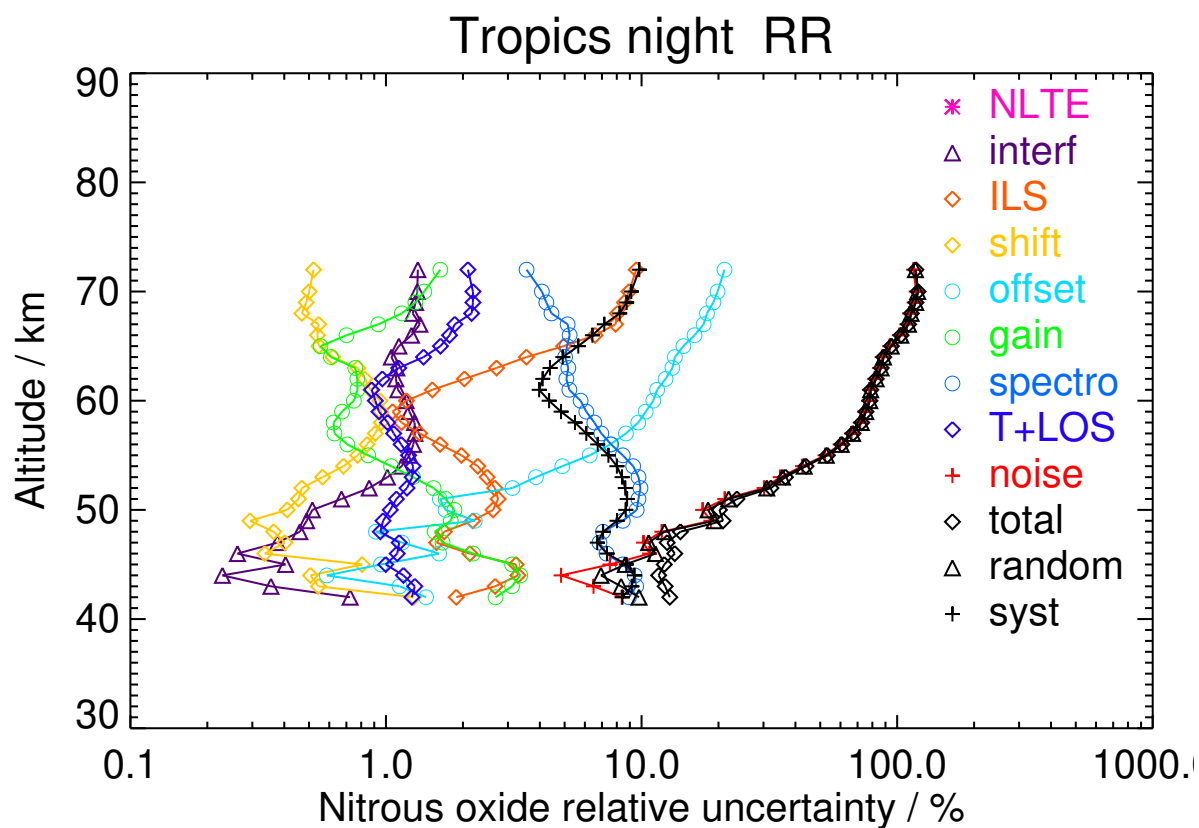

**Figure S256.** V8R\_N2O\_662 Tropics night

**Table S257.** Nitrous oxide error budget for Southern midlatitude winter day. All uncertainties are  $1\sigma$ .

| altitude (km) | mean target (ppbv) | NLTE (ppbv) | interf (ppbv) | ILS (ppbv) | shift (ppbv) | offset (ppbv) | gain (ppbv) | spectro (ppbv) | T+LOS (ppbv) | noise (ppbv) | random (ppbv) | syst (ppbv) | total (ppbv) |
|---------------|--------------------|-------------|---------------|------------|--------------|---------------|-------------|----------------|--------------|--------------|---------------|-------------|--------------|
| 45            | 0.894              | <0.001      | 0.010         | 0.016      | 0.003        | 0.014         | 0.013       | 0.056          | 0.007        | 0.229        | 0.233         | 0.046       | 0.237        |
| 50            | 0.921              | <0.001      | 0.012         | 0.014      | 0.006        | 0.034         | 0.009       | 0.051          | 0.005        | 0.341        | 0.344         | 0.042       | 0.347        |
| 55            | 0.660              | <0.001      | 0.010         | 0.008      | 0.006        | 0.067         | 0.005       | 0.034          | 0.004        | 0.463        | 0.468         | 0.031       | 0.469        |
| 60            | 0.774              | <0.001      | 0.010         | 0.006      | 0.008        | 0.129         | 0.006       | 0.036          | 0.005        | 0.806        | 0.817         | 0.032       | 0.817        |
| 65            | 1.361              | <0.001      | 0.017         | 0.013      | 0.014        | 0.346         | 0.016       | 0.070          | 0.012        | 1.952        | 1.983         | 0.059       | 1.984        |
| 70            | 4.435              | <0.001      | 0.059         | 0.039      | 0.042        | 1.584         | 0.060       | 0.235          | 0.062        | 8.513        | 8.660         | 0.246       | 8.663        |

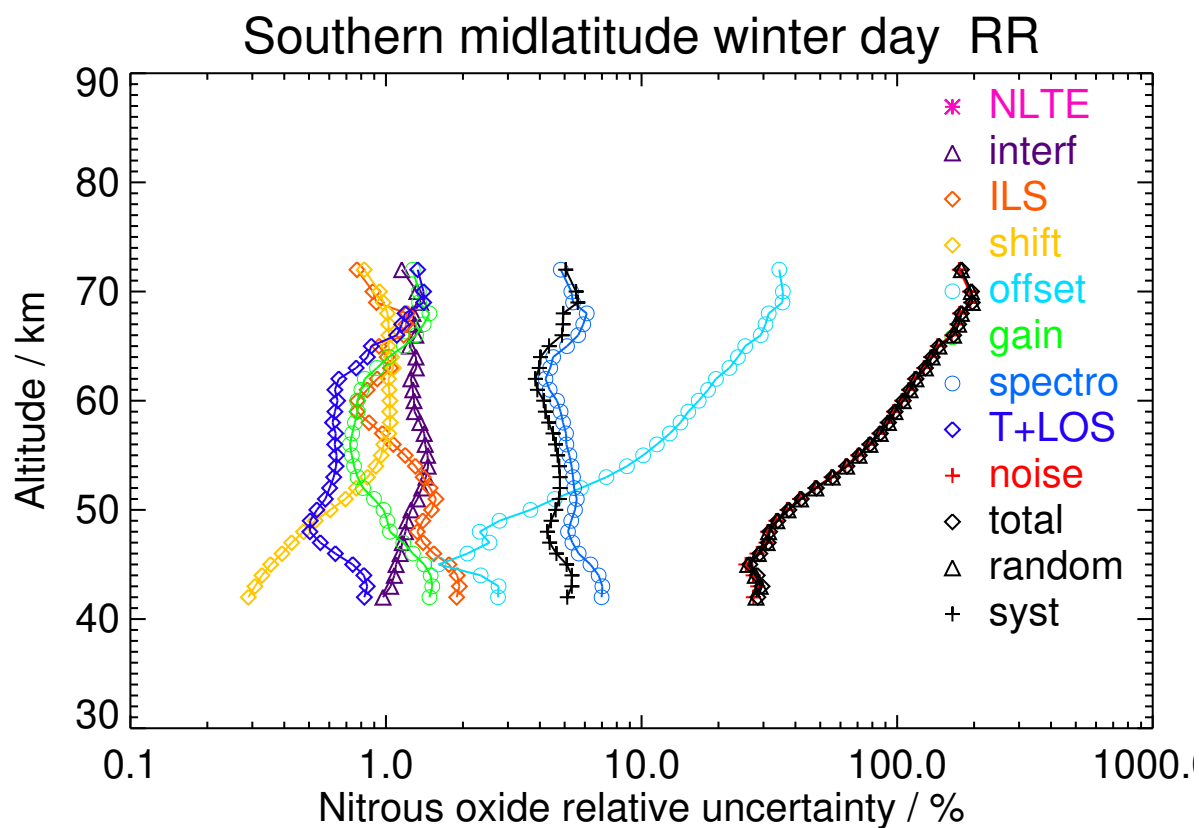

**Figure S257.** V8R\_N2O\_662 Southern midlatitude winter day

**Table S258.** Nitrous oxide error budget for Southern midlatitude winter night. All uncertainties are  $1\sigma$ .

| altitude (km) | mean target (ppbv) | NLTE (ppbv) | interf (ppbv) | ILS (ppbv) | shift (ppbv) | offset (ppbv) | gain (ppbv) | spectro (ppbv) | T+LOS (ppbv) | noise (ppbv) | random (ppbv) | syst (ppbv) | total (ppbv) |
|---------------|--------------------|-------------|---------------|------------|--------------|---------------|-------------|----------------|--------------|--------------|---------------|-------------|--------------|
| 45            | 1.328              | <0.001      | 0.011         | 0.024      | 0.004        | 0.017         | 0.023       | 0.087          | 0.009        | 0.263        | 0.271         | 0.072       | 0.280        |
| 50            | 1.136              | <0.001      | 0.012         | 0.017      | 0.005        | 0.034         | 0.014       | 0.067          | 0.007        | 0.393        | 0.397         | 0.057       | 0.401        |
| 55            | 0.906              | <0.001      | 0.010         | 0.013      | 0.006        | 0.066         | 0.011       | 0.056          | 0.007        | 0.512        | 0.518         | 0.043       | 0.520        |
| 60            | 1.206              | <0.001      | 0.011         | 0.011      | 0.009        | 0.154         | 0.013       | 0.062          | 0.010        | 0.997        | 1.010         | 0.050       | 1.011        |
| 65            | 2.218              | <0.001      | 0.017         | 0.057      | 0.016        | 0.415         | 0.029       | 0.102          | 0.030        | 2.522        | 2.557         | 0.088       | 2.559        |
| 70            | 5.672              | <0.001      | 0.030         | 0.034      | 0.026        | 1.339         | 0.073       | 0.210          | 0.121        | 7.893        | 8.007         | 0.225       | 8.010        |
| 74            | 3.443              | <0.001      | 0.015         | 0.023      | 0.013        | 0.829         | 0.035       | 0.101          | 0.061        | 4.287        | 4.367         | 0.109       | 4.368        |

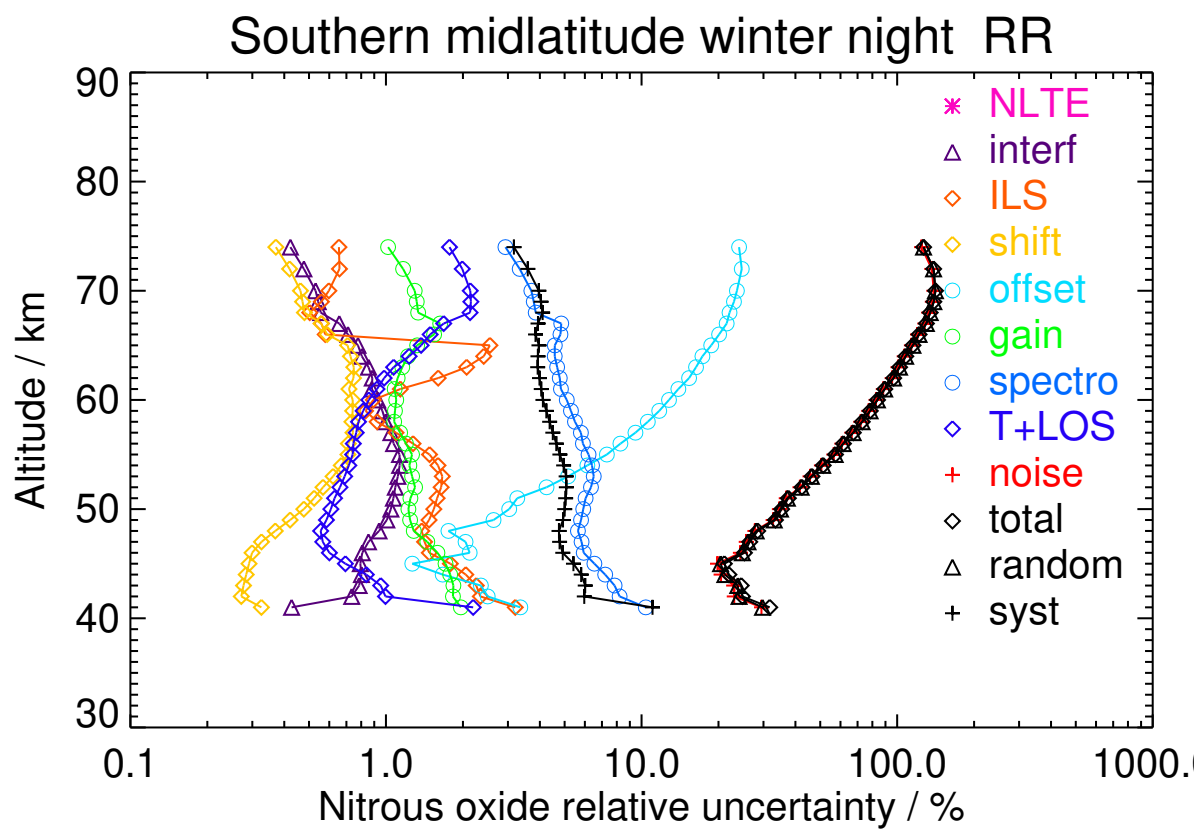

**Figure S258.** V8R\_N2O\_662 Southern midlatitude winter night

**Table S259.** Nitrous oxide error budget for Southern midlatitude spring day. All uncertainties are  $1\sigma$ .

| altitude (km) | mean target (ppbv) | NLTE (ppbv) | interf (ppbv) | ILS (ppbv) | shift (ppbv) | offset (ppbv) | gain (ppbv) | spectro (ppbv) | T+LOS (ppbv) | noise (ppbv) | random (ppbv) | syst (ppbv) | total (ppbv) |
|---------------|--------------------|-------------|---------------|------------|--------------|---------------|-------------|----------------|--------------|--------------|---------------|-------------|--------------|
| 45            | 2.688              | <0.001      | 0.011         | 0.049      | 0.006        | 0.019         | 0.051       | 0.168          | 0.019        | 0.281        | 0.293         | 0.166       | 0.336        |
| 50            | 1.876              | <0.001      | 0.014         | 0.030      | 0.006        | 0.041         | 0.024       | 0.120          | 0.012        | 0.467        | 0.473         | 0.110       | 0.486        |
| 55            | 1.073              | <0.001      | 0.010         | 0.016      | 0.007        | 0.053         | 0.010       | 0.067          | 0.008        | 0.483        | 0.488         | 0.059       | 0.491        |
| 60            | 0.846              | <0.001      | 0.009         | 0.004      | 0.008        | 0.098         | 0.006       | 0.044          | 0.006        | 0.686        | 0.694         | 0.039       | 0.695        |
| 65            | 1.725              | <0.001      | 0.016         | 0.035      | 0.016        | 0.286         | 0.021       | 0.082          | 0.021        | 1.789        | 1.813         | 0.074       | 1.815        |
| 70            | 4.005              | <0.001      | 0.031         | 0.114      | 0.030        | 0.876         | 0.045       | 0.173          | 0.077        | 5.159        | 5.234         | 0.197       | 5.238        |
| 74            | 5.976              | <0.001      | 0.034         | 0.195      | 0.031        | 1.427         | 0.051       | 0.206          | 0.134        | 7.761        | 7.892         | 0.288       | 7.898        |

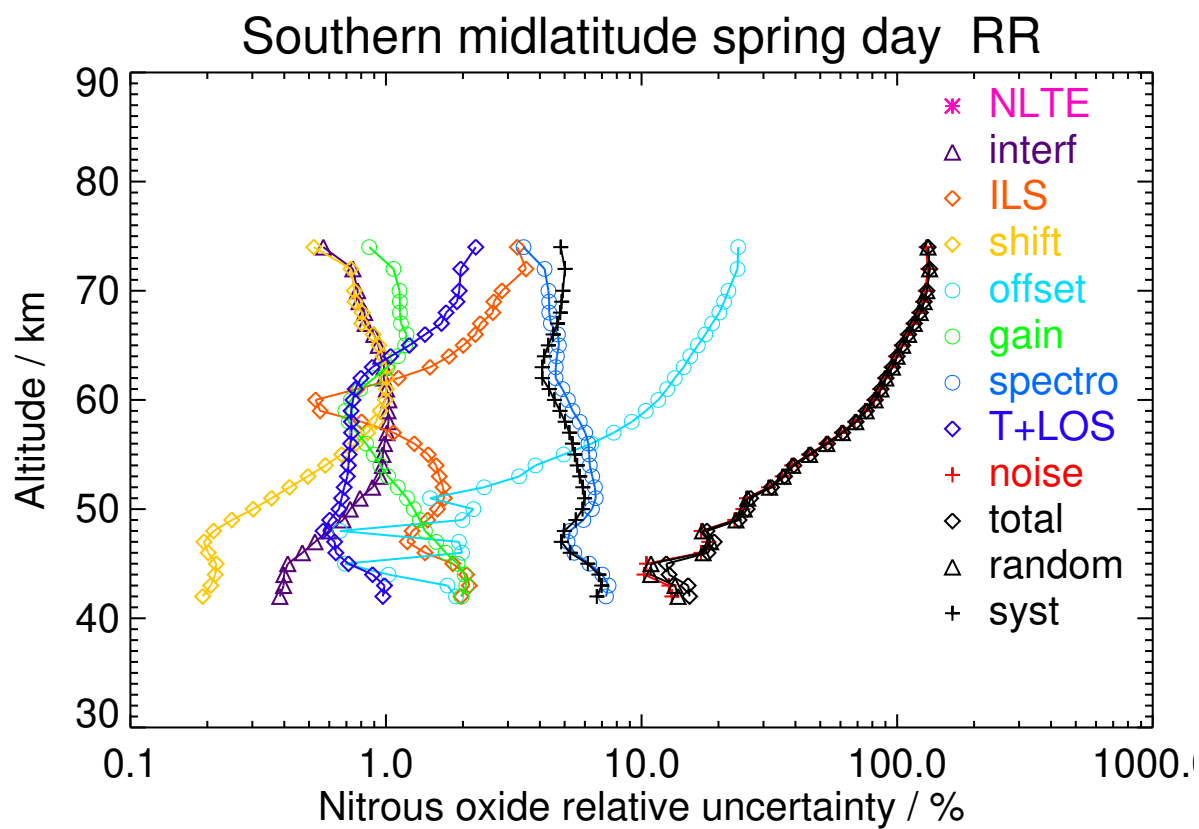

**Figure S259.** V8R\_N2O\_662 Southern midlatitude spring day

**Table S260.** Nitrous oxide error budget for Southern midlatitude spring night. All uncertainties are  $1\sigma$ .

| altitude (km) | mean target (ppbv) | NLTE (ppbv) | interf (ppbv) | ILS (ppbv) | shift (ppbv) | offset (ppbv) | gain (ppbv) | spectro (ppbv) | T+LOS (ppbv) | noise (ppbv) | random (ppbv) | syst (ppbv) | total (ppbv) |
|---------------|--------------------|-------------|---------------|------------|--------------|---------------|-------------|----------------|--------------|--------------|---------------|-------------|--------------|
| 45            | 2.630              | <0.001      | 0.011         | 0.050      | 0.006        | 0.024         | 0.048       | 0.170          | 0.019        | 0.288        | 0.299         | 0.169       | 0.343        |
| 50            | 1.617              | <0.001      | 0.013         | 0.025      | 0.005        | 0.032         | 0.018       | 0.092          | 0.009        | 0.404        | 0.407         | 0.089       | 0.417        |
| 55            | 1.032              | <0.001      | 0.011         | 0.015      | 0.007        | 0.055         | 0.008       | 0.057          | 0.007        | 0.482        | 0.486         | 0.053       | 0.489        |
| 60            | 0.738              | <0.001      | 0.008         | 0.007      | 0.008        | 0.089         | 0.007       | 0.042          | 0.006        | 0.600        | 0.607         | 0.035       | 0.608        |
| 65            | 1.108              | <0.001      | 0.010         | 0.030      | 0.010        | 0.193         | 0.009       | 0.046          | 0.010        | 1.236        | 1.251         | 0.051       | 1.252        |

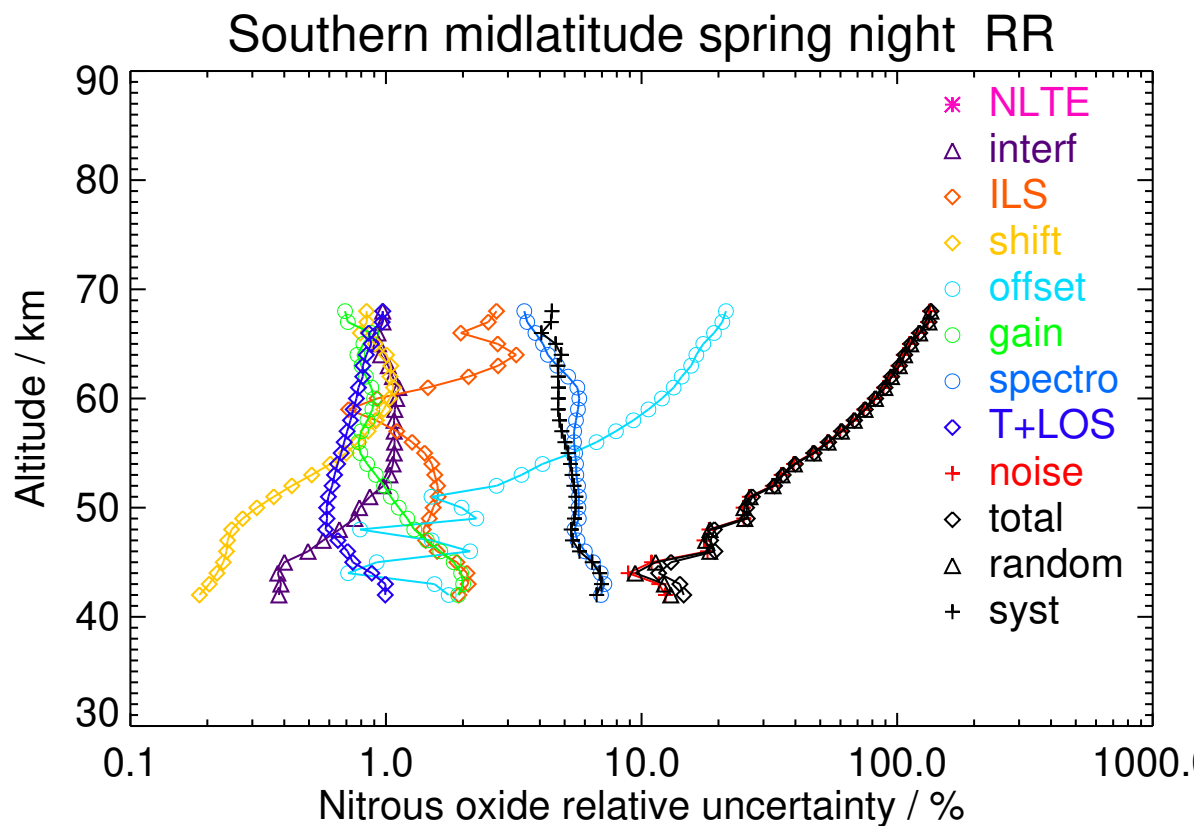

**Figure S260.** V8R\_N2O\_662 Southern midlatitude spring night

**Table S261.** Nitrous oxide error budget for Southern midlatitude summer day. All uncertainties are  $1\sigma$ .

| altitude (km) | mean target (ppbv) | NLTE (ppbv) | interf (ppbv) | ILS (ppbv) | shift (ppbv) | offset (ppbv) | gain (ppbv) | spectro (ppbv) | T+LOS (ppbv) | noise (ppbv) | random (ppbv) | syst (ppbv) | total (ppbv) |
|---------------|--------------------|-------------|---------------|------------|--------------|---------------|-------------|----------------|--------------|--------------|---------------|-------------|--------------|
| 45            | 1.650              | <0.001      | 0.008         | 0.050      | 0.007        | 0.017         | 0.043       | 0.161          | 0.019        | 0.193        | 0.224         | 0.136       | 0.261        |
| 50            | 0.512              | <0.001      | 0.006         | 0.010      | 0.003        | 0.017         | 0.007       | 0.036          | 0.004        | 0.172        | 0.176         | 0.027       | 0.178        |
| 55            | 0.810              | <0.001      | 0.008         | 0.012      | 0.005        | 0.034         | 0.011       | 0.053          | 0.006        | 0.310        | 0.316         | 0.028       | 0.317        |
| 60            | 0.904              | <0.001      | 0.009         | 0.008      | 0.008        | 0.088         | 0.009       | 0.050          | 0.007        | 0.594        | 0.602         | 0.036       | 0.603        |
| 65            | 1.919              | <0.001      | 0.023         | 0.126      | 0.023        | 0.313         | 0.024       | 0.127          | 0.035        | 1.930        | 1.961         | 0.111       | 1.964        |
| 70            | 7.336              | 0.004       | 0.104         | 0.991      | 0.102        | 1.657         | 0.075       | 0.619          | 0.307        | 9.345        | 9.538         | 0.755       | 9.568        |
| 74            | 10.434             | 0.005       | 0.128         | 1.113      | 0.121        | 2.701         | 0.045       | 0.547          | 0.471        | 13.440       | 13.718        | 1.241       | 13.774       |

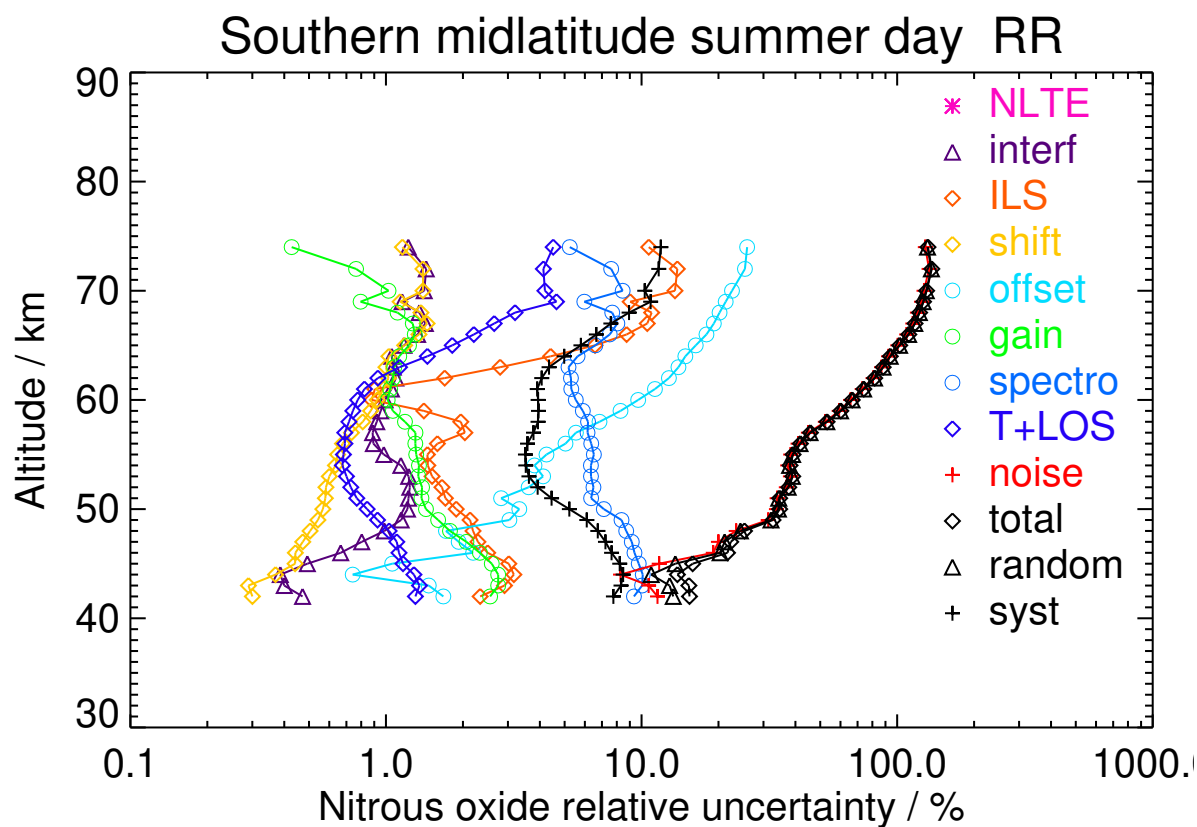

**Figure S261.** V8R\_N2O\_662 Southern midlatitude summer day



**Table S262.** Nitrous oxide error budget for Southern midlatitude summer night. All uncertainties are  $1\sigma$ .

| altitude (km) | mean target (ppbv) | NLTE (ppbv) | interf (ppbv) | ILS (ppbv) | shift (ppbv) | offset (ppbv) | gain (ppbv) | spectro (ppbv) | T+LOS (ppbv) | noise (ppbv) | random (ppbv) | syst (ppbv) | total (ppbv) |
|---------------|--------------------|-------------|---------------|------------|--------------|---------------|-------------|----------------|--------------|--------------|---------------|-------------|--------------|
| 45            | 2.747              | <0.001      | 0.010         | 0.082      | 0.013        | 0.027         | 0.090       | 0.248          | 0.024        | 0.242        | 0.314         | 0.194       | 0.369        |
| 50            | 1.276              | <0.001      | 0.009         | 0.027      | 0.005        | 0.029         | 0.032       | 0.128          | 0.012        | 0.261        | 0.288         | 0.067       | 0.296        |
| 55            | 1.076              | <0.001      | 0.009         | 0.024      | 0.006        | 0.042         | 0.018       | 0.088          | 0.009        | 0.385        | 0.395         | 0.053       | 0.398        |
| 60            | 0.897              | <0.001      | 0.010         | 0.009      | 0.008        | 0.095         | 0.008       | 0.057          | 0.008        | 0.631        | 0.639         | 0.042       | 0.641        |
| 65            | 1.099              | <0.001      | 0.014         | 0.046      | 0.011        | 0.200         | 0.007       | 0.057          | 0.012        | 1.203        | 1.220         | 0.063       | 1.222        |
| 70            | 1.566              | <0.001      | 0.027         | 0.052      | 0.021        | 0.417         | 0.009       | 0.056          | 0.017        | 2.075        | 2.117         | 0.077       | 2.118        |

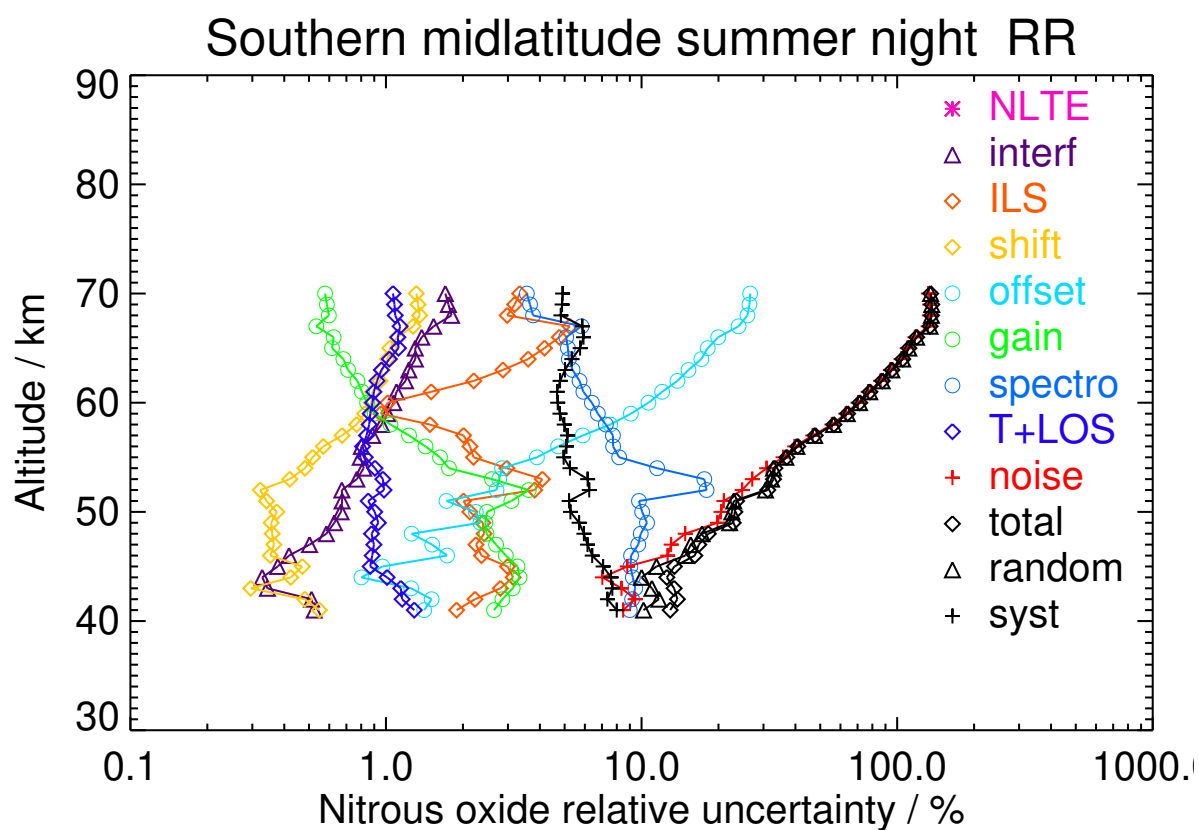

**Figure S262.** V8R\_N2O\_662 Southern midlatitude summer night

**Table S263.** Nitrous oxide error budget for Southern midlatitude autumn day. All uncertainties are  $1\sigma$ .

| altitude (km) | mean target (ppbv) | NLTE (ppbv) | interf (ppbv) | ILS (ppbv) | shift (ppbv) | offset (ppbv) | gain (ppbv) | spectro (ppbv) | T+LOS (ppbv) | noise (ppbv) | random (ppbv) | syst (ppbv) | total (ppbv) |
|---------------|--------------------|-------------|---------------|------------|--------------|---------------|-------------|----------------|--------------|--------------|---------------|-------------|--------------|
| 45            | 4.560              | <0.001      | 0.017         | 0.126      | 0.016        | 0.036         | 0.165       | 0.423          | 0.038        | 0.449        | 0.563         | 0.330       | 0.653        |
| 50            | 2.344              | <0.001      | 0.014         | 0.056      | 0.007        | 0.057         | 0.042       | 0.215          | 0.022        | 0.587        | 0.608         | 0.174       | 0.633        |
| 55            | 1.407              | <0.001      | 0.012         | 0.019      | 0.008        | 0.084         | 0.014       | 0.091          | 0.012        | 0.701        | 0.708         | 0.082       | 0.713        |
| 60            | 1.219              | <0.001      | 0.011         | 0.009      | 0.010        | 0.159         | 0.010       | 0.064          | 0.012        | 1.035        | 1.048         | 0.056       | 1.050        |
| 65            | 2.380              | <0.001      | 0.024         | 0.092      | 0.016        | 0.446         | 0.022       | 0.141          | 0.043        | 2.661        | 2.702         | 0.108       | 2.704        |
| 70            | 5.259              | 0.002       | 0.057         | 0.310      | 0.024        | 1.238         | 0.035       | 0.340          | 0.156        | 7.161        | 7.278         | 0.302       | 7.284        |
| 74            | 6.424              | 0.002       | 0.061         | 0.303      | 0.016        | 1.638         | 0.018       | 0.288          | 0.219        | 8.320        | 8.483         | 0.418       | 8.493        |

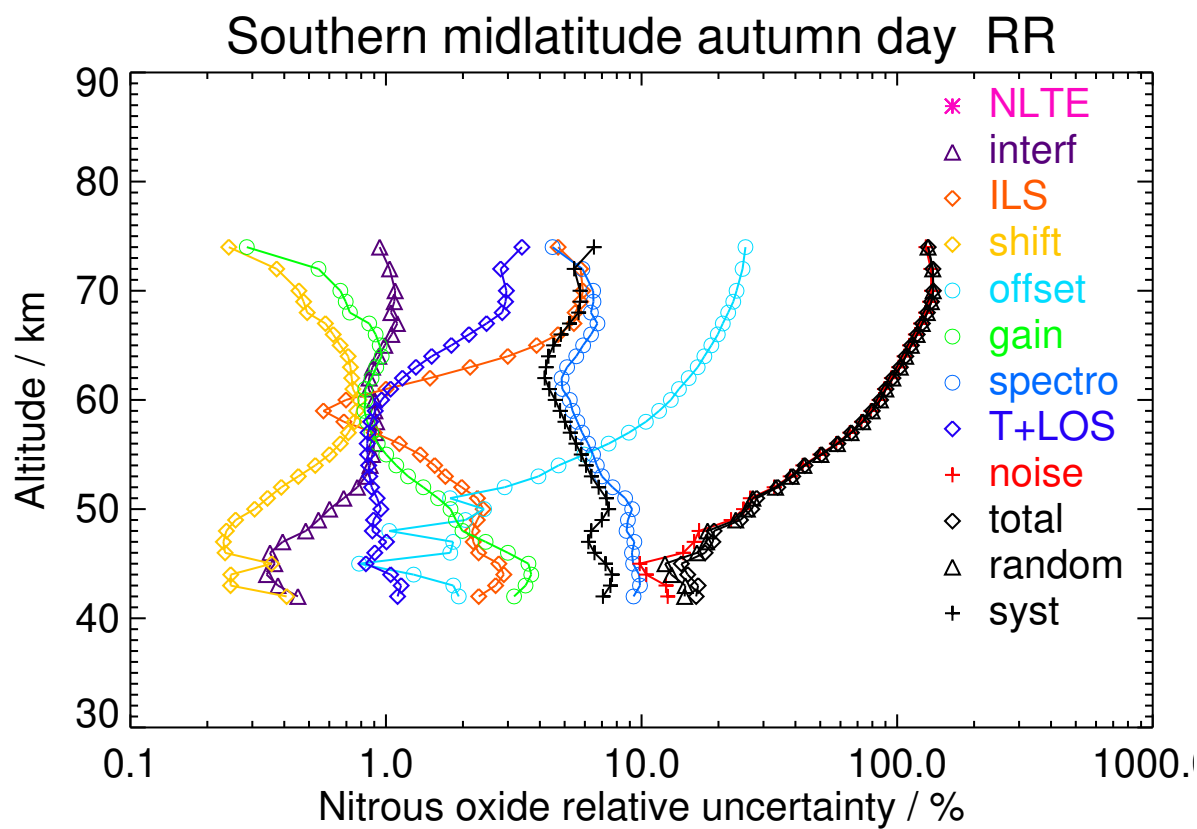

**Figure S263.** V8R\_N2O\_662 Southern midlatitude autumn day

**Table S264.** Nitrous oxide error budget for Southern midlatitude autumn night. All uncertainties are  $1\sigma$ .

| altitude (km) | mean target (ppbv) | NLTE (ppbv) | interf (ppbv) | ILS (ppbv) | shift (ppbv) | offset (ppbv) | gain (ppbv) | spectro (ppbv) | T+LOS (ppbv) | noise (ppbv) | random (ppbv) | syst (ppbv) | total (ppbv) |
|---------------|--------------------|-------------|---------------|------------|--------------|---------------|-------------|----------------|--------------|--------------|---------------|-------------|--------------|
| 45            | 7.016              | <0.001      | 0.022         | 0.190      | 0.031        | 0.057         | 0.230       | 0.579          | 0.059        | 0.552        | 0.684         | 0.519       | 0.859        |
| 50            | 3.264              | <0.001      | 0.016         | 0.069      | 0.008        | 0.068         | 0.055       | 0.261          | 0.030        | 0.667        | 0.688         | 0.230       | 0.726        |
| 55            | 1.755              | <0.001      | 0.013         | 0.024      | 0.008        | 0.086         | 0.018       | 0.117          | 0.017        | 0.752        | 0.759         | 0.106       | 0.767        |
| 60            | 1.149              | <0.001      | 0.010         | 0.011      | 0.008        | 0.142         | 0.008       | 0.067          | 0.012        | 0.961        | 0.972         | 0.062       | 0.974        |
| 65            | 1.457              | <0.001      | 0.013         | 0.035      | 0.011        | 0.289         | 0.011       | 0.071          | 0.018        | 1.775        | 1.799         | 0.069       | 1.800        |
| 70            | 3.268              | <0.001      | 0.032         | 0.114      | 0.023        | 0.925         | 0.029       | 0.133          | 0.056        | 5.164        | 5.247         | 0.167       | 5.249        |

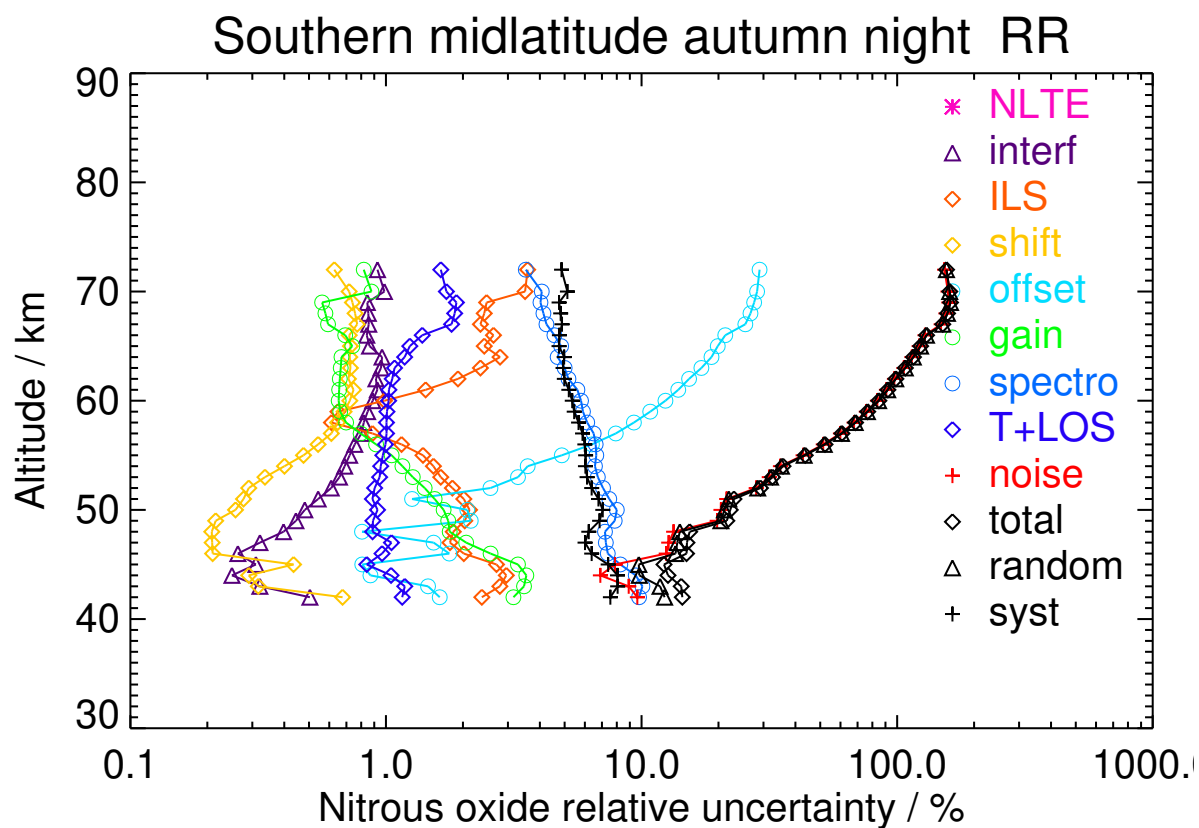

**Figure S264.** V8R\_N2O\_662 Southern midlatitude autumn night

**Table S265.** Nitrous oxide error budget for Southern polar winter day. All uncertainties are  $1\sigma$ .

| altitude (km) | mean target (ppbv) | NLTE (ppbv) | interf (ppbv) | ILS (ppbv) | shift (ppbv) | offset (ppbv) | gain (ppbv) | spectro (ppbv) | T+LOS (ppbv) | noise (ppbv) | random (ppbv) | syst (ppbv) | total (ppbv) |
|---------------|--------------------|-------------|---------------|------------|--------------|---------------|-------------|----------------|--------------|--------------|---------------|-------------|--------------|
| 45            | 1.100              | <0.001      | 0.014         | 0.013      | 0.004        | 0.017         | 0.011       | 0.051          | 0.006        | 0.292        | 0.294         | 0.047       | 0.298        |
| 50            | 0.744              | <0.001      | 0.010         | 0.010      | 0.006        | 0.027         | 0.005       | 0.034          | 0.005        | 0.301        | 0.303         | 0.033       | 0.305        |
| 55            | 0.649              | <0.001      | 0.008         | 0.008      | 0.006        | 0.056         | 0.004       | 0.028          | 0.004        | 0.410        | 0.414         | 0.026       | 0.415        |
| 60            | 0.872              | <0.001      | 0.009         | 0.009      | 0.007        | 0.122         | 0.008       | 0.036          | 0.005        | 0.772        | 0.782         | 0.032       | 0.783        |
| 65            | 1.629              | <0.001      | 0.015         | 0.007      | 0.014        | 0.333         | 0.018       | 0.066          | 0.014        | 2.020        | 2.048         | 0.059       | 2.049        |
| 70            | 3.167              | 0.001       | 0.023         | 0.022      | 0.019        | 0.797         | 0.045       | 0.127          | 0.039        | 4.677        | 4.745         | 0.118       | 4.747        |

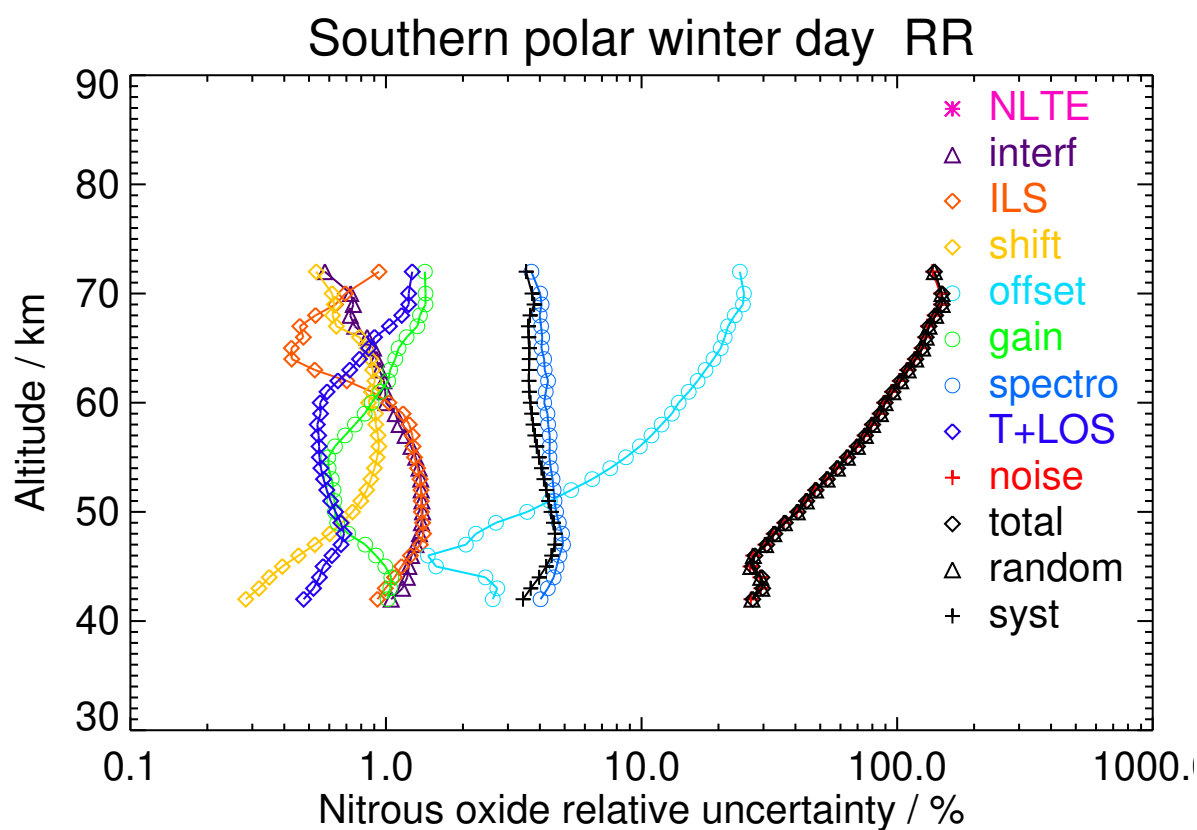

**Figure S265.** V8R\_N2O\_662 Southern polar winter day

**Table S266.** Nitrous oxide error budget for Southern polar winter night. All uncertainties are  $1\sigma$ .

| altitude (km) | mean target (ppbv) | NLTE (ppbv) | interf (ppbv) | ILS (ppbv) | shift (ppbv) | offset (ppbv) | gain (ppbv) | spectro (ppbv) | T+LOS (ppbv) | noise (ppbv) | random (ppbv) | syst (ppbv) | total (ppbv) |
|---------------|--------------------|-------------|---------------|------------|--------------|---------------|-------------|----------------|--------------|--------------|---------------|-------------|--------------|
| 45            | 0.383              | <0.001      | 0.009         | 0.004      | 0.003        | 0.020         | 0.002       | 0.015          | 0.002        | 0.203        | 0.204         | 0.012       | 0.205        |
| 50            | 0.366              | <0.001      | 0.009         | 0.004      | 0.004        | 0.034         | 0.003       | 0.017          | 0.003        | 0.242        | 0.244         | 0.014       | 0.245        |
| 55            | 0.422              | <0.001      | 0.008         | 0.005      | 0.005        | 0.061         | 0.004       | 0.020          | 0.003        | 0.374        | 0.379         | 0.017       | 0.379        |
| 60            | 0.698              | <0.001      | 0.010         | 0.009      | 0.007        | 0.122         | 0.006       | 0.034          | 0.004        | 0.698        | 0.709         | 0.027       | 0.709        |
| 65            | 3.214              | <0.001      | 0.028         | 0.040      | 0.018        | 0.654         | 0.034       | 0.150          | 0.032        | 3.641        | 3.700         | 0.149       | 3.703        |

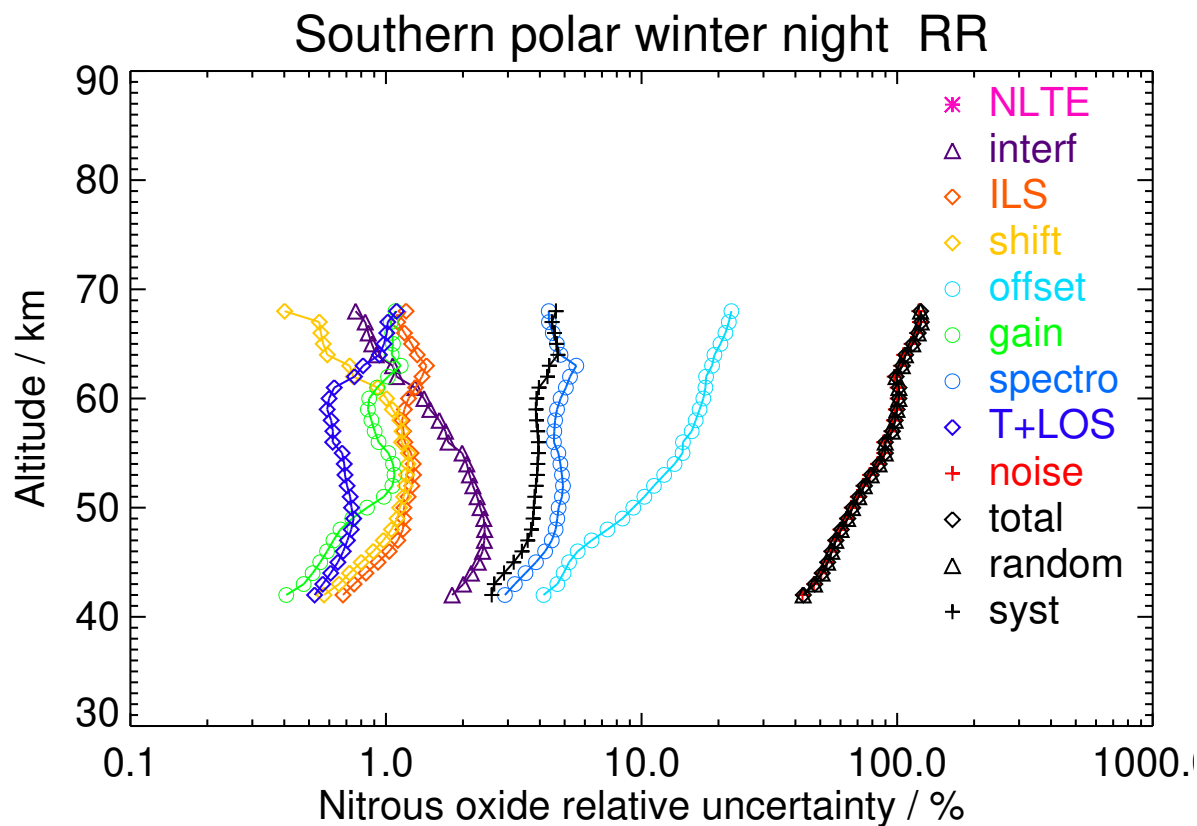

**Figure S266.** V8R\_N2O\_662 Southern polar winter night

**Table S267.** Nitrous oxide error budget for Southern polar spring day. All uncertainties are  $1\sigma$ .

| altitude (km) | mean target (ppbv) | NLTE (ppbv) | interf (ppbv) | ILS (ppbv) | shift (ppbv) | offset (ppbv) | gain (ppbv) | spectro (ppbv) | T+LOS (ppbv) | noise (ppbv) | random (ppbv) | syst (ppbv) | total (ppbv) |
|---------------|--------------------|-------------|---------------|------------|--------------|---------------|-------------|----------------|--------------|--------------|---------------|-------------|--------------|
| 45            | 1.883              | <0.001      | 0.009         | 0.032      | 0.005        | 0.013         | 0.029       | 0.102          | 0.013        | 0.199        | 0.205         | 0.103       | 0.229        |
| 50            | 1.229              | <0.001      | 0.011         | 0.019      | 0.005        | 0.027         | 0.011       | 0.066          | 0.007        | 0.327        | 0.330         | 0.064       | 0.336        |
| 55            | 0.693              | <0.001      | 0.009         | 0.010      | 0.007        | 0.039         | 0.003       | 0.037          | 0.006        | 0.337        | 0.340         | 0.035       | 0.342        |
| 60            | 0.465              | <0.001      | 0.007         | 0.006      | 0.007        | 0.060         | 0.002       | 0.022          | 0.004        | 0.410        | 0.415         | 0.021       | 0.415        |
| 65            | 1.327              | <0.001      | 0.017         | 0.062      | 0.021        | 0.229         | 0.008       | 0.061          | 0.015        | 1.448        | 1.467         | 0.074       | 1.469        |
| 70            | 3.583              | 0.002       | 0.040         | 0.310      | 0.062        | 0.774         | 0.028       | 0.189          | 0.073        | 4.519        | 4.590         | 0.316       | 4.600        |
| 74            | 6.671              | 0.008       | 0.066         | 0.854      | 0.122        | 1.681         | 0.047       | 0.293          | 0.165        | 8.885        | 9.059         | 0.758       | 9.090        |

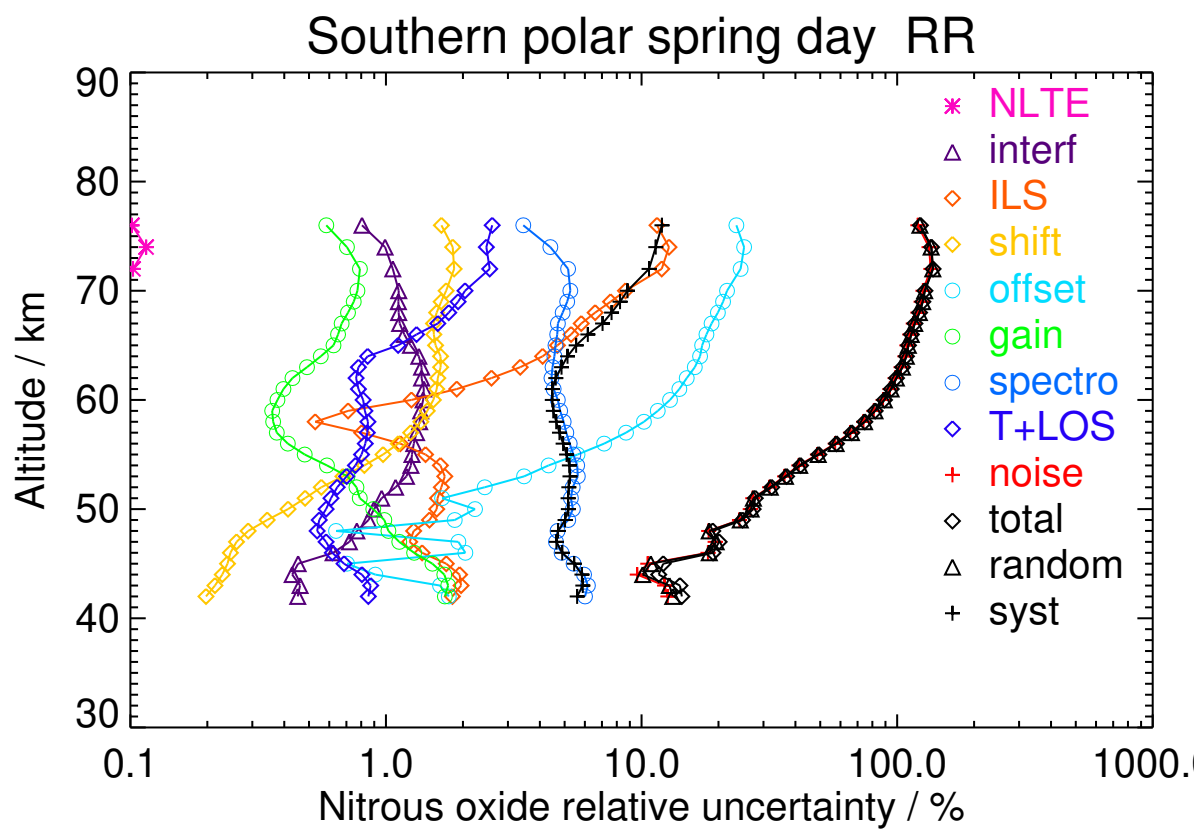

**Figure S267.** V8R\_N2O\_662 Southern polar spring day

**Table S268.** Nitrous oxide error budget for Southern polar spring night. All uncertainties are  $1\sigma$ .

| altitude (km) | mean target (ppbv) | NLTE (ppbv) | interf (ppbv) | ILS (ppbv) | shift (ppbv) | offset (ppbv) | gain (ppbv) | spectro (ppbv) | T+LOS (ppbv) | noise (ppbv) | random (ppbv) | syst (ppbv) | total (ppbv) |
|---------------|--------------------|-------------|---------------|------------|--------------|---------------|-------------|----------------|--------------|--------------|---------------|-------------|--------------|
| 45            | 2.658              | <0.001      | 0.011         | 0.046      | 0.006        | 0.020         | 0.048       | 0.156          | 0.015        | 0.269        | 0.282         | 0.149       | 0.319        |
| 50            | 1.847              | <0.001      | 0.013         | 0.030      | 0.005        | 0.038         | 0.024       | 0.106          | 0.011        | 0.439        | 0.444         | 0.099       | 0.455        |
| 55            | 1.178              | <0.001      | 0.011         | 0.017      | 0.008        | 0.056         | 0.010       | 0.068          | 0.008        | 0.521        | 0.526         | 0.061       | 0.529        |
| 60            | 0.915              | <0.001      | 0.009         | 0.010      | 0.009        | 0.106         | 0.007       | 0.048          | 0.008        | 0.725        | 0.734         | 0.040       | 0.735        |
| 65            | 1.784              | <0.001      | 0.018         | 0.074      | 0.020        | 0.322         | 0.016       | 0.085          | 0.026        | 1.990        | 2.018         | 0.090       | 2.020        |
| 70            | 6.426              | <0.001      | 0.049         | 0.290      | 0.053        | 1.487         | 0.049       | 0.268          | 0.176        | 8.637        | 8.766         | 0.398       | 8.775        |

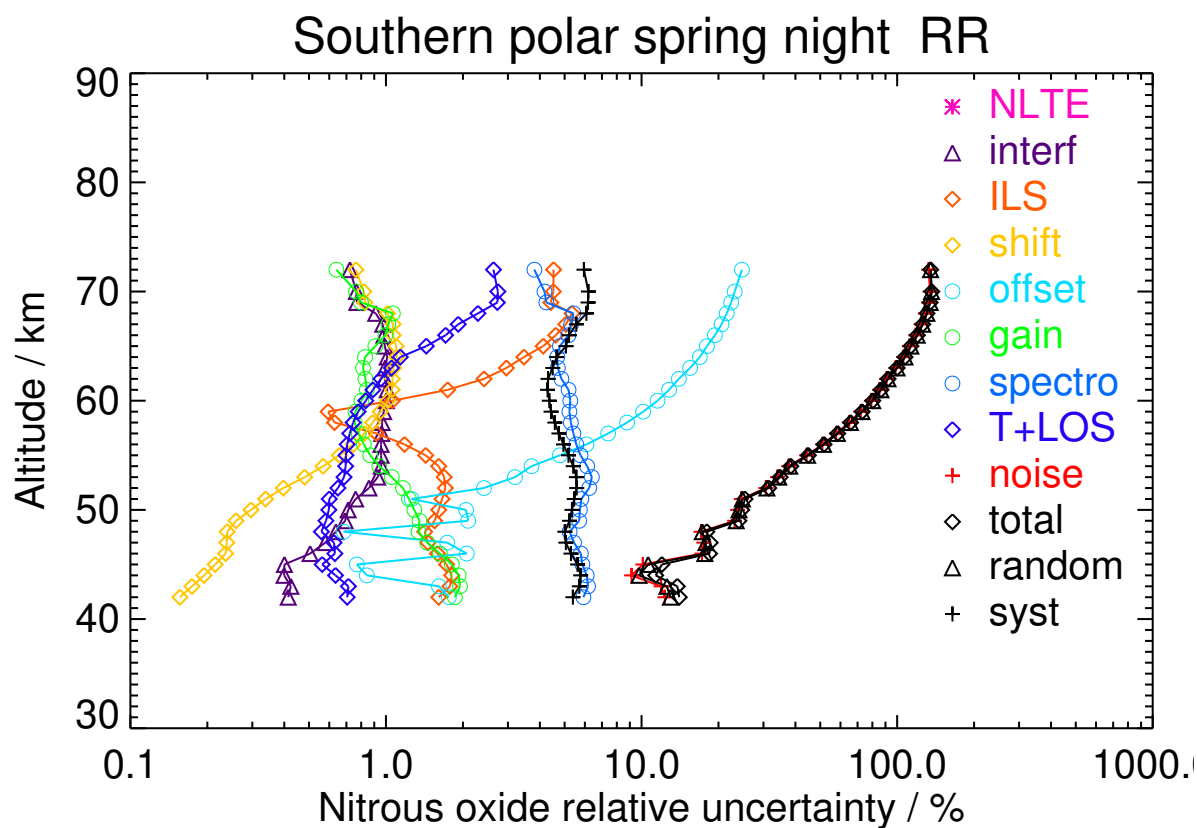

**Figure S268.** V8R\_N2O\_662 Southern polar spring night

**Table S269.** Nitrous oxide error budget for Southern polar summer day. All uncertainties are  $1\sigma$ .

| altitude (km) | mean target (ppbv) | NLTE (ppbv) | interf (ppbv) | ILS (ppbv) | shift (ppbv) | offset (ppbv) | gain (ppbv) | spectro (ppbv) | T+LOS (ppbv) | noise (ppbv) | random (ppbv) | syst (ppbv) | total (ppbv) |
|---------------|--------------------|-------------|---------------|------------|--------------|---------------|-------------|----------------|--------------|--------------|---------------|-------------|--------------|
| 45            | 1.464              | <0.001      | 0.008         | 0.041      | 0.008        | 0.020         | 0.033       | 0.126          | 0.023        | 0.196        | 0.200         | 0.134       | 0.241        |
| 50            | 0.176              | <0.001      | 0.004         | 0.003      | 0.002        | 0.010         | 0.003       | 0.011          | 0.003        | 0.082        | 0.083         | 0.011       | 0.083        |
| 55            | 0.093              | <0.001      | 0.003         | <0.001     | 0.002        | 0.012         | 0.003       | 0.005          | 0.002        | 0.080        | 0.081         | 0.005       | 0.081        |
| 60            | 0.143              | <0.001      | 0.004         | 0.004      | 0.003        | 0.025         | 0.004       | 0.006          | 0.003        | 0.156        | 0.159         | 0.006       | 0.159        |
| 65            | 0.675              | <0.001      | 0.013         | 0.019      | 0.010        | 0.091         | 0.008       | 0.040          | 0.009        | 0.597        | 0.605         | 0.031       | 0.606        |
| 70            | 2.275              | <0.001      | 0.028         | 0.129      | 0.028        | 0.343         | 0.027       | 0.141          | 0.040        | 1.984        | 2.019         | 0.138       | 2.024        |
| 74            | 6.448              | 0.002       | 0.059         | 0.655      | 0.085        | 1.427         | 0.032       | 0.226          | 0.178        | 8.119        | 8.246         | 0.694       | 8.275        |

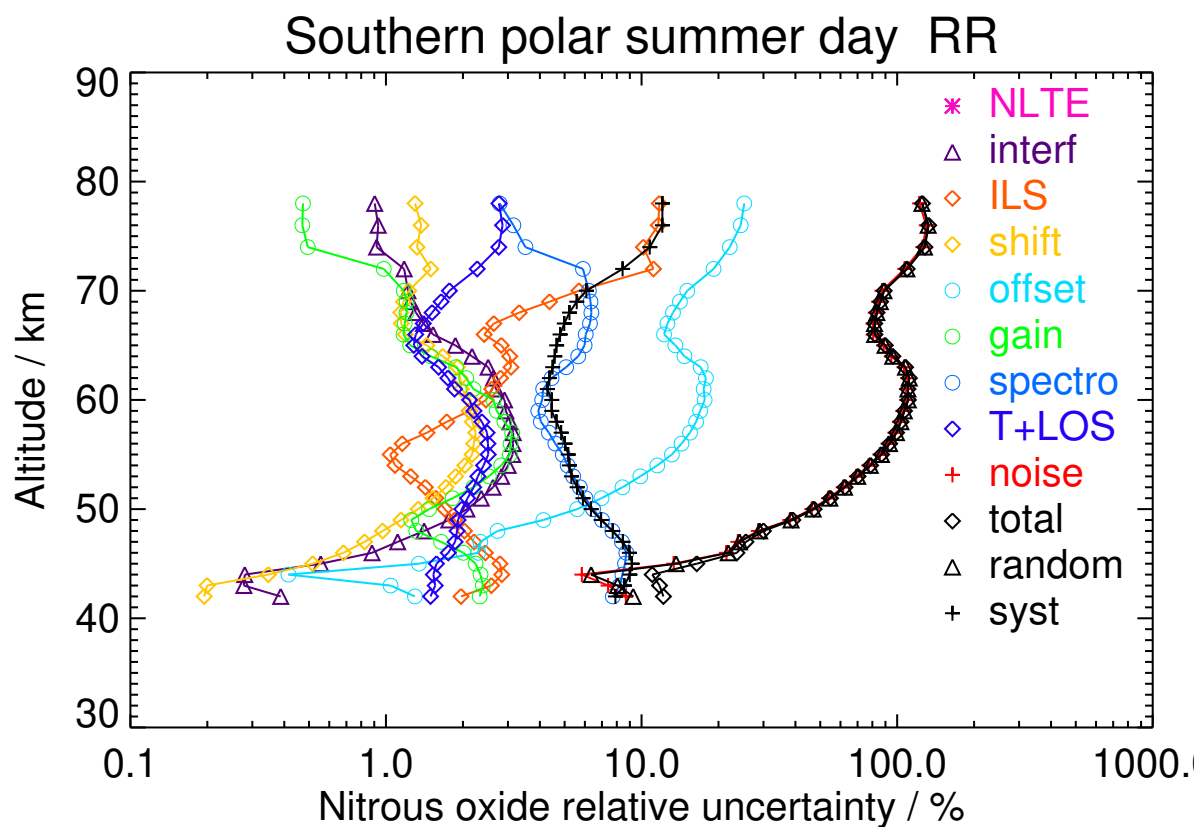

**Figure S269.** V8R\_N2O\_662 Southern polar summer day



**Table S270.** Nitrous oxide error budget for Southern polar summer night. All uncertainties are  $1\sigma$ .

| altitude (km) | mean target (ppbv) | NLTE (ppbv) | interf (ppbv) | ILS (ppbv) | shift (ppbv) | offset (ppbv) | gain (ppbv) | spectro (ppbv) | T+LOS (ppbv) | noise (ppbv) | random (ppbv) | syst (ppbv) | total (ppbv) |
|---------------|--------------------|-------------|---------------|------------|--------------|---------------|-------------|----------------|--------------|--------------|---------------|-------------|--------------|
| 45            | 0.279              | <0.001      | 0.005         | 0.007      | 0.002        | 0.010         | 0.002       | 0.024          | 0.005        | 0.091        | 0.093         | 0.021       | 0.095        |
| 50            | 0.123              | <0.001      | 0.004         | 0.002      | 0.002        | 0.012         | 0.002       | 0.007          | 0.002        | 0.078        | 0.080         | 0.007       | 0.080        |
| 55            | 0.178              | <0.001      | 0.005         | 0.002      | 0.003        | 0.027         | 0.003       | 0.008          | 0.002        | 0.157        | 0.160         | 0.008       | 0.160        |
| 60            | 0.290              | <0.001      | 0.008         | <0.001     | 0.005        | 0.060         | 0.004       | 0.012          | 0.003        | 0.329        | 0.334         | 0.011       | 0.334        |
| 65            | 1.713              | <0.001      | 0.026         | 0.020      | 0.019        | 0.367         | 0.009       | 0.068          | 0.019        | 1.948        | 1.983         | 0.072       | 1.984        |
| 70            | 2.178              | <0.001      | 0.027         | 0.035      | 0.021        | 0.553         | 0.013       | 0.077          | 0.027        | 2.827        | 2.881         | 0.086       | 2.882        |

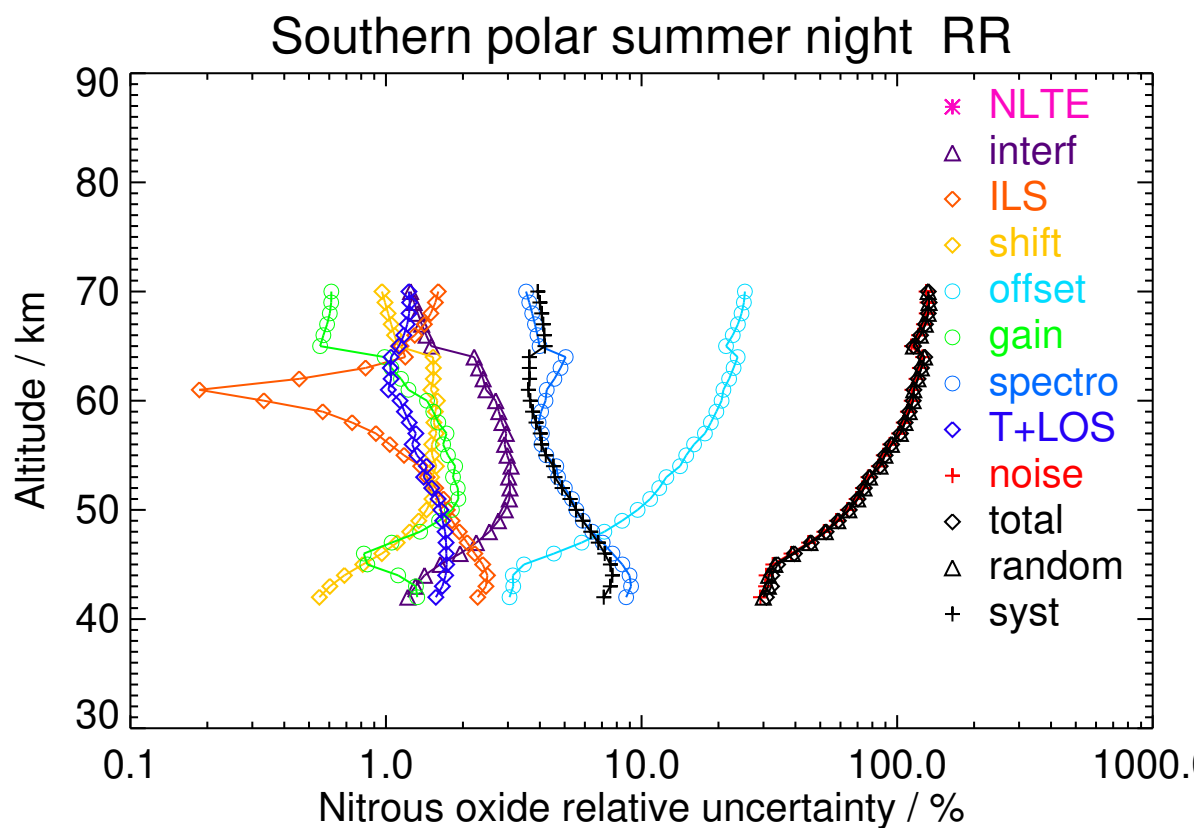

**Figure S270.** V8R\_N2O\_662 Southern polar summer night

**Table S271.** Nitrous oxide error budget for Southern polar autumn day. All uncertainties are  $1\sigma$ .

| altitude (km) | mean target (ppbv) | NLTE (ppbv) | interf (ppbv) | ILS (ppbv) | shift (ppbv) | offset (ppbv) | gain (ppbv) | spectro (ppbv) | T+LOS (ppbv) | noise (ppbv) | random (ppbv) | syst (ppbv) | total (ppbv) |
|---------------|--------------------|-------------|---------------|------------|--------------|---------------|-------------|----------------|--------------|--------------|---------------|-------------|--------------|
| 45            | 0.275              | <0.001      | 0.006         | 0.002      | 0.002        | 0.015         | 0.001       | 0.009          | 0.002        | 0.153        | 0.154         | 0.008       | 0.154        |
| 50            | 0.313              | <0.001      | 0.008         | 0.004      | 0.004        | 0.029         | 0.002       | 0.014          | 0.002        | 0.211        | 0.214         | 0.011       | 0.214        |
| 55            | 0.416              | <0.001      | 0.009         | 0.006      | 0.006        | 0.060         | 0.003       | 0.019          | 0.003        | 0.356        | 0.361         | 0.016       | 0.362        |
| 60            | 0.644              | <0.001      | 0.011         | 0.007      | 0.009        | 0.130         | 0.005       | 0.028          | 0.004        | 0.716        | 0.728         | 0.025       | 0.728        |
| 65            | 1.721              | <0.001      | 0.018         | 0.010      | 0.016        | 0.408         | 0.015       | 0.067          | 0.015        | 2.208        | 2.245         | 0.067       | 2.246        |
| 70            | 2.003              | <0.001      | 0.021         | 0.011      | 0.017        | 0.575         | 0.020       | 0.082          | 0.019        | 2.918        | 2.974         | 0.072       | 2.975        |

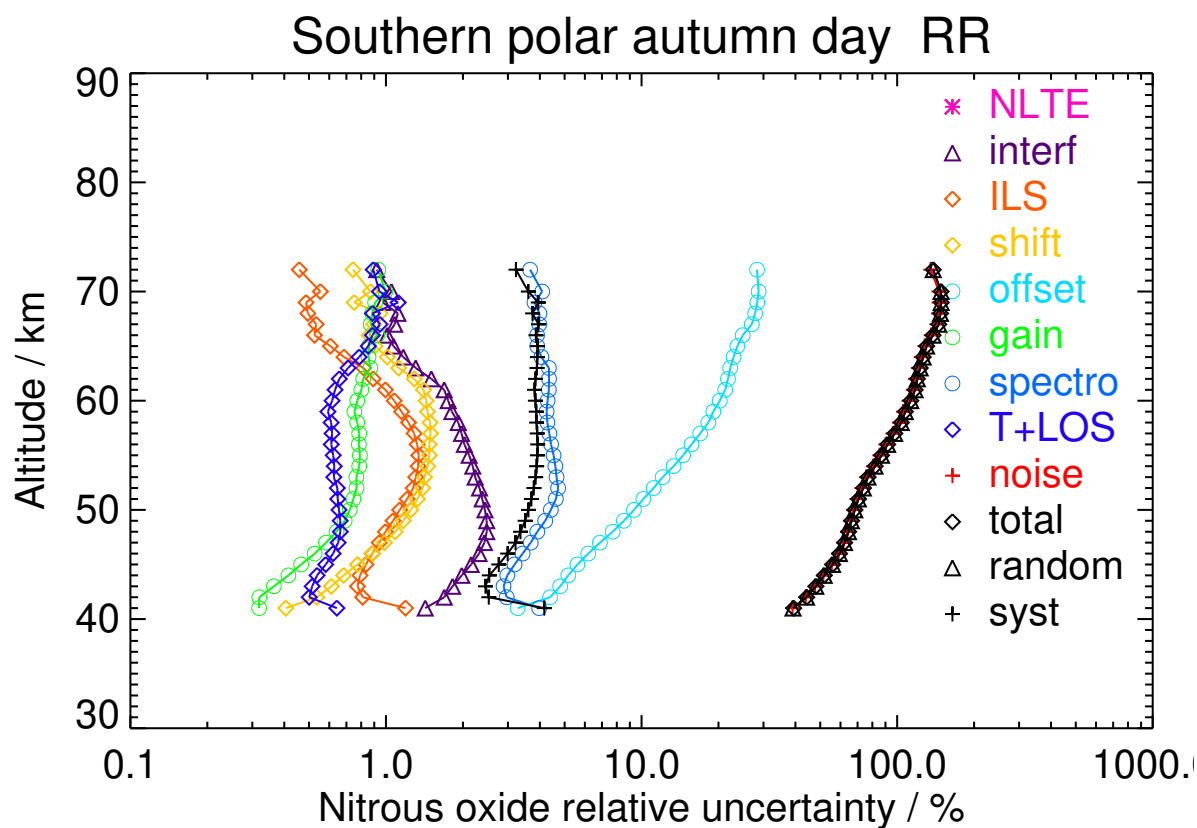

**Figure S271.** V8R\_N2O\_662 Southern polar autumn day

**Table S272.** Nitrous oxide error budget for Southern polar autumn night. All uncertainties are  $1\sigma$ .

| altitude (km) | mean target (ppbv) | NLTE (ppbv) | interf (ppbv) | ILS (ppbv) | shift (ppbv) | offset (ppbv) | gain (ppbv) | spectro (ppbv) | T+LOS (ppbv) | noise (ppbv) | random (ppbv) | syst (ppbv) | total (ppbv) |
|---------------|--------------------|-------------|---------------|------------|--------------|---------------|-------------|----------------|--------------|--------------|---------------|-------------|--------------|
| 45            | 0.396              | <0.001      | 0.008         | 0.003      | 0.003        | 0.019         | 0.002       | 0.014          | 0.002        | 0.205        | 0.206         | 0.012       | 0.206        |
| 50            | 0.444              | <0.001      | 0.009         | 0.005      | 0.005        | 0.035         | 0.004       | 0.021          | 0.003        | 0.269        | 0.272         | 0.017       | 0.273        |
| 55            | 0.507              | <0.001      | 0.009         | 0.007      | 0.006        | 0.067         | 0.004       | 0.025          | 0.003        | 0.410        | 0.416         | 0.021       | 0.417        |
| 60            | 0.727              | <0.001      | 0.010         | 0.010      | 0.007        | 0.128         | 0.006       | 0.035          | 0.004        | 0.723        | 0.734         | 0.029       | 0.735        |
| 65            | 1.913              | <0.001      | 0.015         | 0.025      | 0.009        | 0.371         | 0.023       | 0.081          | 0.017        | 2.095        | 2.128         | 0.076       | 2.129        |
| 70            | 2.487              | <0.001      | 0.016         | 0.019      | 0.008        | 0.598         | 0.026       | 0.081          | 0.025        | 3.257        | 3.312         | 0.087       | 3.313        |

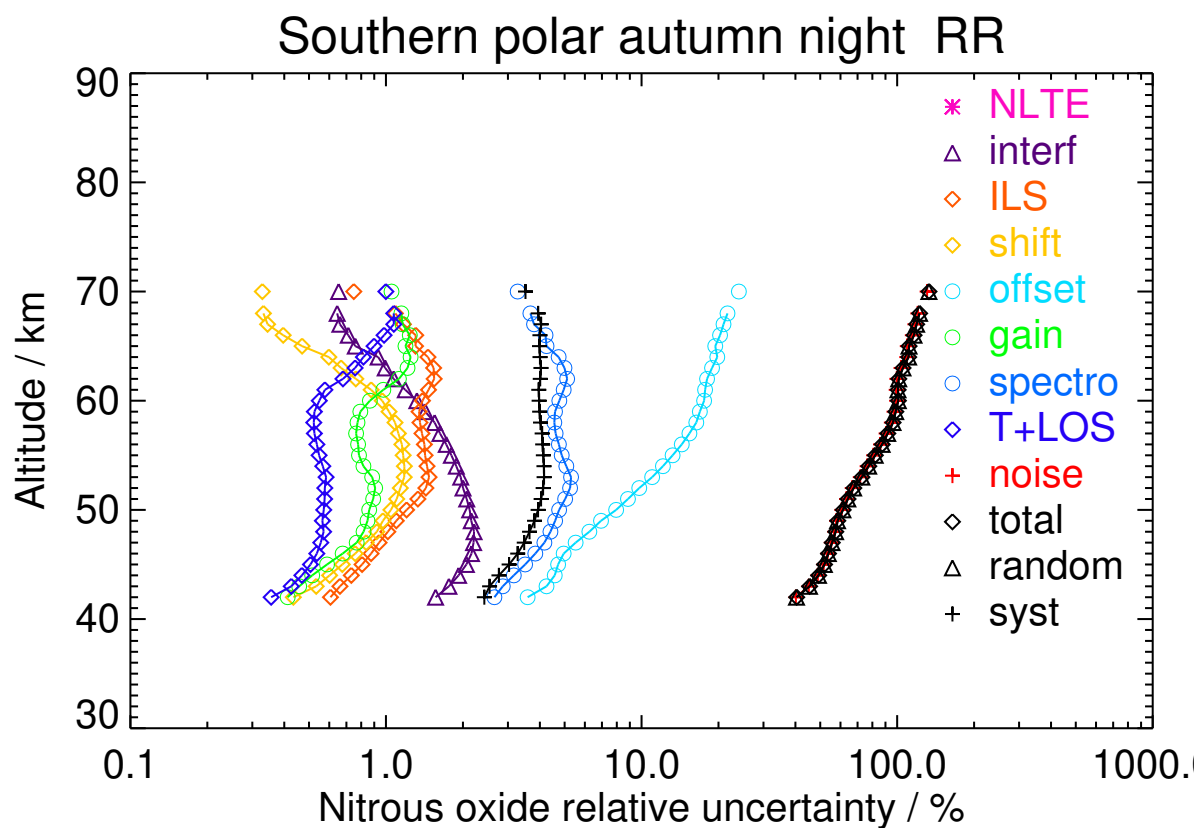

**Figure S272.** V8R\_N2O\_662 Southern polar autumn night
